# Supplementary material for: Inferring the depth and magnitude of pre-instrumental earthquakes from intensity attenuation curves
Source: Copernicus journal article supplement (doi:10.5194/nhess-23-1007-2023), 2023-03-06
Supplement: Supplementary file 68 [file nhess-23-1007-2023-supplement.zip]

Archive with 8 entries (7 files):
- nhess-2022-30-supplement-version3/
- nhess-2022-30-supplement-version3/Fig_S2.jpg
- nhess-2022-30-supplement-version3/Table_S1.pdf
- nhess-2022-30-supplement-version3/zip_S1.zip
- nhess-2022-30-supplement-version3/Fig_S1.jpg
- nhess-2022-30-supplement-version3/zip_S2.zip
- nhess-2022-30-supplement-version3/Table_S2.pdf
- nhess-23-1007-2023-supplement-title-page.pdf
