# Supplementary material for: Inferring the depth and magnitude of pre-instrumental earthquakes from intensity attenuation curves
Source: Copernicus journal article supplement (doi:10.5194/nhess-23-1007-2023), 2023-03-06
Supplement: Supplementary file 68 [file nhess-23-1007-2023-supplement.zip › nhess-23-1007-2023-supplement-title-page.pdf]

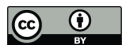

## *Supplement of*

# **Inferring the depth and magnitude of pre-instrumental earthquakes from intensity attenuation curves**

**Paola Sbarra et al.**

*Correspondence to:* Paola Sbarra ([paola.sbarra@ingv.it](mailto:paola.sbarra@ingv.it))

- [nhess-23-1007-2023-supplement-title-page.pdf](#)
- [nhess-2022-30-supplement-version3](#)
  - [Fig\\_S1.jpg](#)
  - [Fig\\_S2.jpg](#)
  - [Table\\_S1.pdf](#)
  - [Table\\_S2.pdf](#)
  - [zip\\_S1.zip](#)
  - [zip\\_S2.zip](#)

The copyright of individual parts of the supplement might differ from the article licence.
