# Supplementary material for: Inferring the depth and magnitude of pre-instrumental earthquakes from intensity attenuation curves
Source: Copernicus journal article supplement (doi:10.5194/nhess-23-1007-2023), 2023-03-06
Supplement: Supplementary file 68 [file nhess-23-1007-2023-supplement.zip › nhess-2022-30-supplement-version3/Table_S1.pdf]

Table S1. List of the 206 earthquakes comprising the analyzed set of this work. In the header "**Lon**" and "**Lat**" are the epicentral coordinates; "**Depth lower limit**" and "**Depth higher limit**" are the hypocenter depth uncertainty limits calculated using the confidence bands of eq. 3 (see. Fig. 5); "**Std Err**" is the standard error of the attenuation steepness; "**l<sub>e</sub>**" is the expected intensity at the epicenter; "**N. of averaged points**" is the number of intensity data points obtained by averaging the intensity values (if present) of the moving windows within 55 km from epicenter (see Fig. 2); "**Azimuth range**" is the azimuth range for which MDPs are present in the range of 10 - 55 km from epicenter; "**Mw lower limit**" and "**Mw higher limit**" are calculated applying the eq.4 to the lower and higher depth limit. The unit of the "**Steepness**" and of the "**Std Err**" is intensity/km. "**Inferred hypocentral depth**" is calculated using Eq. 5. The "**Mw y-intercept**" is calculated using Eq. 4. An asterisk in the field **l<sub>e</sub>** indicates that for the relevant earthquake we used the extended source approach, i.e. we corrected the **l<sub>e</sub>** value shown here using a geometric correction ( $l_e = l_c - S/R_e$ ) to obtain a more reliable **Mw** (for further details please refer to Sect. 3.8). **M<sub>0</sub>** is calculated using Hanks e Kanamori (1979) formula. Eq. 3 and Eq. 5 can be applied for a steepness interval  $0.058 \leq S \leq 0.010$ , which corresponds to the depth interval 5.0 - 73.0 km, respectively. Uncertainties of depth and magnitude were not calculated in these cases. We used Eq.4 on the analysed set even beyond the application limits of **l<sub>e</sub>** to still estimate an indicative magnitude (in these cases **Mw** y-intercept is marked with an asterisk).

| ID | Event date        | DBMI Id           | Lon    | Lat    | M <sub>w</sub> (CPT15) | Inferred Hypocentral Depth (km) | Depth lower limit | Depth higher limit | MDP (within 55 km) | MDP (all distances) | Steepness | Std Err | l <sub>e</sub> | N. of averaged points | Azimuth range | M <sub>w</sub> (y-intercept this work) | M <sub>0</sub> lower limit | M <sub>0</sub> higher limit | M <sub>0</sub> CPT15 (N°m) | M <sub>0</sub> y-intercept (N°m) |
|----|-------------------|-------------------|--------|--------|------------------------|---------------------------------|-------------------|--------------------|--------------------|---------------------|-----------|---------|----------------|-----------------------|---------------|----------------------------------------|----------------------------|-----------------------------|----------------------------|----------------------------------|
| 1  | December 5, 1456  | 14561205_0000_000 | 14.711 | 41.302 | 7.19                   | 35.24                           | 28.54             | 46.57              | 107                | 199                 | 0.023     | 0.0073  | 9.504*         | 7                     | 330           | 7.16*                                  | 7.12                       | 7.21                        | 6.10E+19                   | 5.50E+19                         |
| 2  | March 26, 1511    | 15110326_1440_000 | 13.216 | 46.209 | 6.32                   | 17.05                           | 14.23             | 20.22              | 61                 | 120                 | 0.036     | 0.0096  | 8.058          | 10                    | 190           | 6.46                                   | 6.43                       | 6.49                        | 3.02E+18                   | 4.90E+18                         |
| 3  | July 30, 1627     | 16270730_1050_000 | 15.342 | 41.737 | 6.66                   | ≤ 5                             | -                 | -                  | 39                 | 64                  | 0.063     | 0.0062  | 9.902*         | 7                     | 230           | 6.64*                                  | -                          | -                           | 9.77E+18                   | 9.12E+18                         |
| 4  | March 27, 1638    | 16380327_1505_000 | 16.289 | 39.048 | 7.09                   | 12.85                           | 10.42             | 15.33              | 184                | 213                 | 0.041     | 0.0074  | 10.011*        | 7                     | 250           | 6.91*                                  | 6.87                       | 6.94                        | 4.32E+19                   | 2.32E+19                         |
| 5  | June 8, 1638      | 16380608_0945_000 | 16.812 | 39.279 | 6.76                   | 11.59                           | 9.14              | 13.80              | 40                 | 41                  | 0.043     | 0.0063  | 9.718*         | 7                     | 180           | 6.89*                                  | 6.85                       | 6.92                        | 1.38E+19                   | 2.16E+19                         |
| 6  | November 5, 1659  | 16591105_2215_000 | 16.249 | 38.694 | 6.57                   | 24.13                           | 19.96             | 29.20              | 120                | 126                 | 0.03      | 0.0055  | 8.907*         | 8                     | 270           | 6.78*                                  | 6.75                       | 6.82                        | 7.16E+18                   | 1.48E+19                         |
| 7  | March 22, 1661    | 16610322_1250_000 | 11.898 | 44.021 | 6.05                   | ≤ 5                             | -                 | -                  | 74                 | 79                  | 0.077     | 0.0093  | 8.823          | 10                    | 250           | 6.67*                                  | -                          | -                           | 1.19E+18                   | 1.01E+19                         |
| 8  | September 8, 1694 | 16940908_1140_000 | 15.406 | 40.862 | 6.73                   | ≤ 5                             | -                 | -                  | 133                | 251                 | 0.058     | 0.006   | 9.752*         | 7                     | 350           | 6.67*                                  | -                          | -                           | 1.24E+19                   | 1.01E+19                         |
| 9  | June 11, 1695     | 16950611_0220_000 | 12.11  | 42.613 | 5.8                    | 49.71                           | 38.10             | 70.71              | 45                 | 50                  | 0.017     | 0.0095  | 6.927          | 9                     | 190           | 6.02                                   | 5.97                       | 6.09                        | 5.01E+17                   | 1.07E+18                         |
| 10 | January 14, 1703  | 17030114_1800_000 | 13.071 | 42.708 | 6.92                   | 5.82                            | 4.00              | 7.68               | 161                | 197                 | 0.055     | 0.008   | 9.506*         | 8                     | 310           | 6.65*                                  | 6.58                       | 6.70                        | 2.40E+19                   | 9.44E+18                         |
| 11 | February 2, 1703  | 17030202_1105_000 | 13.292 | 42.434 | 6.67                   | 28.48                           | 23.36             | 35.52              | 54                 | 69                  | 0.027     | 0.0074  | 9.193*         | 8                     | 180           | 6.97*                                  | 6.93                       | 7.01                        | 1.01E+19                   | 2.85E+19                         |
| 12 | November 3, 1706  | 17061103_1300_000 | 14.08  | 42.076 | 6.84                   | 19.09                           | 15.99             | 22.75              | 86                 | 99                  | 0.034     | 0.0074  | 9.246*         | 8                     | 330           | 6.86*                                  | 6.83                       | 6.90                        | 1.82E+19                   | 1.95E+19                         |
| 13 | May 12, 1730      | 17300512_0500_000 | 13.12  | 42.753 | 6.04                   | ≤ 5                             | -                 | -                  | 109                | 115                 | 0.08      | 0.0099  | 8.633          | 10                    | 260           | 6.56*                                  | -                          | -                           | 1.15E+18                   | 6.92E+18                         |
| 14 | November 29, 1732 | 17321129_0740_000 | 15.059 | 41.064 | 6.75                   | 9.37                            | 6.98              | 11.28              | 167                | 183                 | 0.047     | 0.0043  | 8.812*         | 8                     | 330           | 6.49*                                  | 6.44                       | 6.52                        | 1.33E+19                   | 5.43E+18                         |
| 15 | April 24, 1741    | 17410424_0900_000 | 13.005 | 43.425 | 6.17                   | 34.94                           | 28.54             | 46.57              | 110                | 135                 | 0.023     | 0.0042  | 7.601          | 10                    | 320           | 6.34                                   | 6.30                       | 6.39                        | 1.80E+18                   | 3.24E+18                         |
| 16 | June 3, 1781      | 17810603_0000_000 | 12.512 | 43.596 | 6.51                   | 10.36                           | 7.99              | 12.47              | 142                | 157                 | 0.045     | 0.009   | 8.241          | 10                    | 280           | 6.48*                                  | 6.43                       | 6.51                        | 5.82E+18                   | 5.25E+18                         |
| 17 | February 7, 1783  | 17830207_1310_000 | 16.201 | 38.58  | 6.74                   | ≤ 5                             | -                 | -                  | 139                | 191                 | 0.097     | 0.0066  | 9.847*         | 7                     | 290           | 6.26*                                  | -                          | -                           | 1.29E+19                   | 2.45E+18                         |
| 18 | March 28, 1783    | 17830328_1855_000 | 16.464 | 38.785 | 7.03                   | 5.74                            | 3.72              | 7.33               | 195                | 323                 | 0.056     | 0.007   | 9.587*         | 7                     | 270           | 6.63*                                  | 6.55                       | 6.67                        | 3.51E+19                   | 8.81E+18                         |
| 19 | October 13, 1791  | 17911013_0120_000 | 16.268 | 38.636 | 6.14                   | 7.88                            | 5.68              | 9.75               | 69                 | 76                  | 0.05      | 0.0094  | 7.94           | 10                    | 190           | 6.26                                   | 6.20                       | 6.30                        | 1.62E+18                   | 2.45E+18                         |
| 20 | July 28, 1799     | 17990728_2205_000 | 13.151 | 43.193 | 6.18                   | 6.22                            | 4.29              | 8.06               | 65                 | 70                  | 0.054     | 0.0031  | 8.601          | 8                     | 180           | 6.59*                                  | 6.52                       | 6.63                        | 1.86E+18                   | 7.67E+18                         |
| 21 | May 12, 1802      | 18020512_0930_000 | 9.839  | 45.424 | 5.6                    | 11.1                            | 8.55              | 13.11              | 56                 | 94                  | 0.044     | 0.0073  | 6.797          | 10                    | 200           | 5.68                                   | 5.63                       | 5.71                        | 2.51E+17                   | 3.31E+17                         |
| 22 | July 26, 1805     | 18050726_2100_000 | 14.474 | 41.5   | 6.68                   | 7.25                            | 5.29              | 9.29               | 135                | 220                 | 0.051     | 0.007   | 9.126*         | 8                     | 320           | 6.56*                                  | 6.51                       | 6.61                        | 1.05E+19                   | 6.92E+18                         |
| 23 | April 2, 1808     | 18080402_1643_000 | 7.248  | 44.838 | 5.64                   | 17.47                           | 14.23             | 20.22              | 68                 | 105                 | 0.036     | 0.0047  | 7.104          | 10                    | 230           | 5.93                                   | 5.90                       | 5.96                        | 2.88E+17                   | 7.85E+17                         |
| 24 | February 20, 1818 | 18180220_1815_000 | 15.14  | 37.603 | 6.28                   | 27.08                           | 22.19             | 33.25              | 98                 | 128                 | 0.028     | 0.004   | 8.115          | 10                    | 190           | 6.58*                                  | 6.54                       | 6.62                        | 2.63E+18                   | 7.41E+18                         |
| 25 | October 9, 1828   | 18281009_0220_000 | 9.047  | 44.821 | 5.72                   | 23.49                           | 19.96             | 29.20              | 73                 | 110                 | 0.03      | 0.0057  | 7.337          | 10                    | 290           | 6.12                                   | 6.09                       | 6.16                        | 3.80E+17                   | 1.51E+18                         |
| 26 | March 8, 1832     | 18320308_1830_000 | 16.919 | 39.079 | 6.65                   | 8.66                            | 6.52              | 10.74              | 63                 | 99                  | 0.048     | 0.0037  | 9.047*         | 8                     | 190           | 6.57*                                  | 6.52                       | 6.61                        | 9.44E+18                   | 7.16E+18                         |
| 27 | February 14, 1834 | 18340214_1315_000 | 9.859  | 44.432 | 5.96                   | ≤ 5                             | -                 | -                  | 100                | 112                 | 0.063     | 0.0094  | 7.572          | 9                     | 230           | 5.97                                   | -                          | -                           | 8.71E+17                   | 9.02E+17                         |
| 28 | August 14, 1846   | 18460814_1200_000 | 10.562 | 43.47  | 6.04                   | ≤ 5                             | -                 | -                  | 92                 | 121                 | 0.081     | 0.0094  | 8.1            | 10                    | 260           | 6.27                                   | -                          | -                           | 1.15E+18                   | 2.54E+18                         |
| 29 | December 16, 1857 | 18571216_2115_001 | 15.842 | 40.352 | 7.12                   | 11.08                           | 8.55              | 13.11              | 153                | 340                 | 0.044     | 0.0065  | 9.417*         | 7                     | 340           | 6.73*                                  | 6.68                       | 6.76                        | 4.79E+19                   | 1.24E+19                         |
| 30 | March 12, 1873    | 18730312_2004_000 | 13.244 | 43.089 | 5.85                   | 13.67                           | 11.11             | 16.17              | 32                 | 196                 | 0.04      | 0.0068  | 7.281          | 10                    | 190           | 5.99                                   | 5.95                       | 6.02                        | 5.96E+17                   | 9.66E+17                         |
| 31 | June 29, 1873     | 18730629_0358_000 | 12.383 | 46.159 | 6.29                   | 6.14                            | 4.29              | 8.06               | 104                | 197                 | 0.054     | 0.0061  | 8.16           | 10                    | 240           | 6.34*                                  | 6.27                       | 6.39                        | 2.72E+18                   | 3.24E+18                         |
| 32 | July 12, 1873     | 18730712_0606_000 | 13.778 | 41.686 | 5.38                   | 8.26                            | 6.08              | 10.24              | 44                 | 61                  | 0.049     | 0.0067  | 6.881          | 10                    | 190           | 5.67                                   | 5.62                       | 5.71                        | 1.17E+17                   | 3.20E+17                         |
| 33 | August 24, 1877   | 18770824_0245_000 | 13.351 | 41.71  | 5.21                   | 28.71                           | 23.36             | 35.52              | 44                 | 54                  | 0.027     | 0.0089  | 5.838          | 10                    | 200           | 5.31                                   | 5.28                       | 5.35                        | 6.53E+16                   | 9.23E+16                         |
| 34 | September 5, 1886 | 18860905_0000_000 | 7.306  | 45.036 | 5.22                   | 31.13                           | 25.85             | 40.63              | 73                 | 101                 | 0.025     | 0.0061  | 5.894          | 10                    | 280           | 5.36                                   | 5.33                       | 5.41                        | 6.76E+16                   | 1.10E+17                         |
| 35 | February 23, 1887 | 18870223_0521_000 | 7.992  | 43.891 | 6.27                   | 37.43                           | 29.97             | 49.88              | 237                | 1511                | 0.022     | 0.0028  | 7.663          | 10                    | 200           | 6.38                                   | 6.34                       | 6.44                        | 2.54E+18                   | 3.72E+18                         |
| 36 | November 14, 1887 | 18871114_0548_000 | 11.219 | 43.749 | 4.47                   | ≤ 5                             | -                 | -                  | 90                 | 101                 | 0.079     | 0.0045  | 5.172          | 10                    | 310           | 4.63                                   | -                          | -                           | 5.07E+15                   | 8.81E+15                         |
| 37 | December 3, 1887  | 18871203_0345_000 | 16.221 | 39.564 | 5.55                   | ≤ 5                             | -                 | -                  | 78                 | 142                 | 0.062     | 0.0065  | 7.049          | 10                    | 260           | 5.68                                   | -                          | -                           | 2.11E+17                   | 3.31E+17                         |
| 38 | May 9, 1891       | 18910509_0016_000 | 13.486 | 41.804 | 4.42                   | 27.02                           | 22.19             | 33.25              | 36                 | 41                  | 0.028     | 0.007   | 4.791          | 10                    | 190           | 4.72                                   | 4.68                       | 4.75                        | 4.27E+15                   | 1.20E+16                         |
| 39 | June 7, 1891      | 18910607_0106_000 | 11.165 | 45.564 | 5.87                   | 13.43                           | 11.11             | 16.17              | 184                | 403                 | 0.04      | 0.0066  | 6.456          | 10                    | 330           | 5.52                                   | 5.49                       | 5.56                        | 6.38E+17                   | 1.91E+17                         |
| 40 | June 15, 1891     | 18910615_0000_000 | 10.767 | 45.43  | 4.69                   | 58.84                           | 43.89             | 72.40              | 33                 | 35                  | 0.014     | 0.0098  | 4.508          | 8                     | 180           | 4.7                                    | 4.65                       | 4.74                        | 1.08E+16                   | 1.12E+16                         |
| 41 | January 5, 1892   | 18920105_0000_000 | 10.471 | 45.592 | 4.96                   | 10.32                           | 7.99              | 12.47              | 54                 | 93                  | 0.045     | 0.0051  | 5.93           | 10                    | 220           | 5.18                                   | 5.13                       | 5.21                        | 2.75E+16                   | 5.89E+16                         |
| 42 | March 5, 1892     | 18920305_0000_000 | 7.797  | 45.569 | 4.98                   | 9.38                            | 6.98              | 11.28              | 72                 | 86                  | 0.047     | 0.0068  | 5.198          | 9                     | 290           | 4.75                                   | 4.70                       | 4.79                        | 2.95E+16                   | 1.33E+16                         |
| 43 | August 9, 1892    | 18920809_0758_000 | 11.204 | 45.566 | 4.91                   | ≤ 5                             | -                 | -                  | 104                | 160                 | 0.066     | 0.0037  | 6.022          | 10                    | 310           | 5.1                                    | -                          | -                           | 2.32E+16                   | 4.47E+16                         |
| 44 | January 25, 1893  | 18930125_0000_000 | 15.36  | 40.513 | 5.15                   | 5.07                            | 3.23              | 6.68               | 66                 | 134                 | 0.058     | 0.0056  | 6.026          | 10                    | 290           | 5.11                                   | 5.03                       | 5.16                        | 5.31E+16                   | 4.62E+16                         |
| 45 | August 2, 1893    | 18930802_0059_000 | 13.002 | 42.608 | 4.55                   | 6.13                            | 4.29              | 8.06               | 60                 | 84                  | 0.054     | 0.0057  | 5.577          | 10                    | 320           | 4.89                                   | 4.83                       | 4.94                        | 6.68E+15                   | 2.16E+16                         |
| 46 | October 27, 1893  | 18931027_1631_000 | 12.265 | 46.18  | 4.42                   | 8.64                            | 6.52              | 10.74              | 32                 | 54                  | 0.048     | 0.0072  | 5.482          | 10                    | 220           | 4.9                                    | 4.85                       | 4.94                        | 4.27E+15                   | 2.24E+16                         |
| 47 | February 9, 1894  | 18940209_1248_000 | 11.14  | 45.584 | 4.74                   | ≤ 5                             | -                 | -                  | 76                 | 116                 | 0.066     | 0.0051  | 5.382          | 10                    | 310           | 4.74                                   | -                          | -                           | 1.29E+16                   | 1.29E+16</                       |

|     |                    |                   |        |        |      |       |       |       |     |      |       |        |        |    |       |       |      |      |          |          |
|-----|--------------------|-------------------|--------|--------|------|-------|-------|-------|-----|------|-------|--------|--------|----|-------|-------|------|------|----------|----------|
| 61  | September 6, 1897  | 18970906_0310_000 | 10.667 | 43.79  | 4.59 | 12.85 | 10.42 | 15.33 | 55  | 104  | 0.041 | 0.0067 | 5.021  | 10 | 280   | 4.71  | 4.67 | 4.74 | 7.67E+15 | 1.16E+16 |
| 62  | December 18, 1897  | 18971218_0724_000 | 12.382 | 43.498 | 5.09 | ≤ 5   | -     | -     | 60  | 132  | 0.066 | 0.0081 | 6.701  | 10 | 290   | 5.48  | -    | -    | 4.32E+16 | 1.66E+17 |
| 63  | February 20, 1898  | 18980220_0457_000 | 13.478 | 46.105 | 5.12 | 14.31 | 11.83 | 17.07 | 77  | 155  | 0.039 | 0.0058 | 5.608  | 10 | 280   | 5.06  | 5.03 | 5.09 | 4.79E+16 | 3.89E+16 |
| 64  | March 4, 1898      | 18980304_2105_000 | 10.26  | 44.655 | 5.37 | 9.22  | 6.98  | 11.28 | 87  | 313  | 0.047 | 0.0087 | 6.126  | 10 | 280   | 5.27  | 5.22 | 5.31 | 1.14E+17 | 8.04E+16 |
| 65  | June 26, 1899      | 18990626_2317_000 | 11.117 | 43.958 | 5.02 | ≤ 5   | -     | -     | 80  | 138  | 0.06  | 0.0088 | 6.326  | 10 | 300   | 5.27  | -    | -    | 3.39E+16 | 8.04E+16 |
| 66  | July 19, 1899      | 18990719_1318_000 | 12.686 | 41.798 | 5.1  | ≤ 5   | -     | -     | 53  | 122  | 0.06  | 0.0031 | 6.687  | 10 | 230   | 5.47  | -    | -    | 4.47E+16 | 1.60E+17 |
| 67  | April 24, 1901     | 19010424_1420_000 | 12.736 | 42.1   | 5.25 | ≤ 5   | -     | -     | 40  | 44   | 0.109 | 0.0081 | 6.76   | 10 | 220   | 5.52  | -    | -    | 7.50E+16 | 1.91E+17 |
| 68  | July 31, 1901      | 19010731_1038_000 | 13.75  | 41.719 | 5.16 | ≤ 5   | -     | -     | 45  | 76   | 0.063 | 0.005  | 7.326  | 10 | 240   | 5.83  | -    | -    | 5.50E+16 | 5.56E+17 |
| 69  | October 30, 1901   | 19011030_1449_000 | 10.49  | 45.584 | 5.44 | 18.14 | 15.09 | 21.44 | 147 | 289  | 0.035 | 0.0055 | 6.265  | 10 | 320   | 5.47  | 5.44 | 5.50 | 1.45E+17 | 1.60E+17 |
| 70  | June 19, 1902      | 19020619_0923_000 | 11.257 | 46.823 | 4.96 | 16.45 | 13.40 | 19.08 | 84  | 184  | 0.037 | 0.0041 | 5.498  | 10 | 320   | 5.02  | 4.99 | 5.05 | 2.75E+16 | 3.39E+16 |
| 71  | August 4, 1902     | 19020804_2236_000 | 10.28  | 44.113 | 4.78 | 26.78 | 22.19 | 33.25 | 38  | 60   | 0.028 | 0.0059 | 5.454  | 10 | 200   | 5.09  | 5.05 | 5.12 | 1.48E+16 | 4.32E+16 |
| 72  | November 2, 1904   | 19041102_1532_000 | 13.918 | 41.932 | 4.54 | ≤ 5   | -     | -     | 31  | 44   | 0.086 | 0.0066 | 5.481  | 10 | 190   | 4.8   | -    | -    | 6.46E+15 | 1.58E+16 |
| 73  | November 17, 1904  | 19041117_0502_000 | 10.821 | 43.965 | 5.1  | 28    | 23.36 | 35.52 | 68  | 204  | 0.027 | 0.0069 | 5.209  | 10 | 270   | 4.96  | 4.92 | 5.00 | 4.47E+16 | 2.75E+16 |
| 74  | February 12, 1905  | 19050212_0828_000 | 11.558 | 42.862 | 4.55 | ≤ 5   | -     | -     | 42  | 61   | 0.096 | 0.0054 | 6.197  | 10 | 260   | 5.2   | -    | -    | 6.68E+15 | 6.31E+16 |
| 75  | March 14, 1905     | 19050314_1916_000 | 14.807 | 40.951 | 4.9  | ≤ 5   | -     | -     | 70  | 94   | 0.06  | 0.0031 | 5.973  | 10 | 340   | 5.07  | -    | -    | 2.24E+16 | 4.03E+16 |
| 76  | September 8, 1905  | 19050908_0143_000 | 16     | 38.811 | 6.95 | 5.84  | 4.00  | 7.68  | 264 | 895  | 0.055 | 0.0037 | 9.199* | 8  | 220   | 6.57* | 6.50 | 6.62 | 2.66E+19 | 7.16E+18 |
| 77  | April 21, 1906     | 19060421_0635_000 | 11.137 | 43.446 | 4.3  | ≤ 5   | -     | -     | 42  | 45   | 0.09  | 0.0065 | 5.306  | 10 | 250   | 4.7   | -    | -    | 2.82E+15 | 1.12E+16 |
| 78  | November 10, 1906  | 19061110_1755_000 | 9.567  | 44.388 | 4.22 | ≤ 5   | -     | -     | 41  | 43   | 0.086 | 0.0088 | 5.116  | 10 | 220   | 4.59  | -    | -    | 2.14E+15 | 7.67E+15 |
| 79  | April 25, 1907     | 19070425_0452_000 | 11.073 | 45.318 | 4.79 | ≤ 5   | -     | -     | 52  | 122  | 0.06  | 0.0058 | 6.206  | 10 | 250   | 5.2   | -    | -    | 1.53E+16 | 6.31E+16 |
| 80  | July 2, 1907       | 19070702_0232_000 | 13.103 | 46.423 | 4.53 | 20.19 | 16.94 | 24.18 | 35  | 38   | 0.033 | 0.0044 | 4.751  | 10 | 210   | 4.64  | 4.61 | 4.67 | 6.24E+15 | 9.12E+15 |
| 81  | October 23, 1907   | 19071023_2028_000 | 15.985 | 38.086 | 5.96 | 19.31 | 15.99 | 22.75 | 177 | 274  | 0.034 | 0.003  | 7.965  | 10 | 320   | 6.43  | 6.40 | 6.46 | 8.71E+17 | 4.42E+18 |
| 82  | December 18, 1907  | 19071218_1921_000 | 14.892 | 40.845 | 4.52 | 5.04  | 3.23  | 6.68  | 32  | 35   | 0.058 | 0.0078 | 5.6    | 10 | 210   | 4.87  | 4.79 | 4.92 | 6.03E+15 | 2.02E+16 |
| 83  | July 10, 1908      | 19080710_0213_000 | 13.191 | 46.465 | 5.31 | 9.95  | 7.47  | 11.86 | 37  | 119  | 0.046 | 0.0067 | 6.158  | 10 | 180   | 5.3   | 5.25 | 5.33 | 9.23E+16 | 8.91E+16 |
| 84  | December 10, 1908  | 19081210_0620_000 | 15.036 | 38.059 | 5.11 | ≤ 5   | -     | -     | 30  | 64   | 0.071 | 0.0062 | 6.507  | 10 | 180   | 5.37  | -    | -    | 4.62E+16 | 1.14E+17 |
| 85  | December 28, 1908  | 19081228_0420_000 | 15.687 | 38.146 | 7.1  | 9.96  | 7.47  | 11.86 | 314 | 772  | 0.046 | 0.0101 | 9.618* | 7  | 330   | 6.75* | 6.70 | 6.79 | 4.47E+19 | 1.33E+19 |
| 86  | January 13, 1909   | 19090113_0045_000 | 11.688 | 44.579 | 5.36 | 43.54 | 34.63 | 61.47 | 106 | 867  | 0.019 | 0.0028 | 5.942  | 10 | 330   | 5.45  | 5.41 | 5.51 | 1.10E+17 | 1.50E+17 |
| 87  | January 23, 1910   | 19100123_0150_000 | 9.659  | 44.857 | 4.39 | ≤ 5   | -     | -     | 48  | 118  | 0.063 | 0.0088 | 4.984  | 10 | 240   | 4.52  | -    | -    | 3.85E+15 | 6.03E+15 |
| 88  | June 7, 1910       | 19100607_0204_000 | 15.421 | 40.898 | 5.76 | 7.54  | 5.29  | 9.29  | 138 | 376  | 0.051 | 0.0049 | 7.584  | 10 | 340   | 6.05  | 5.99 | 6.09 | 4.37E+17 | 1.19E+18 |
| 89  | February 19, 1911  | 19110219_0718_000 | 12.074 | 44.117 | 5.26 | 5.08  | 3.23  | 6.68  | 61  | 181  | 0.058 | 0.0075 | 6.861  | 10 | 260   | 5.57  | 5.49 | 5.62 | 7.76E+16 | 2.26E+17 |
| 90  | April 10, 1911     | 19110410_0943_000 | 12.648 | 41.779 | 4.74 | ≤ 5   | -     | -     | 52  | 79   | 0.067 | 0.0052 | 5.684  | 10 | 240   | 4.91  | -    | -    | 1.29E+16 | 2.32E+16 |
| 91  | September 13, 1911 | 19110913_2229_000 | 11.344 | 43.436 | 5.08 | 5.36  | 3.47  | 7.00  | 59  | 115  | 0.057 | 0.004  | 6.892  | 10 | 310   | 5.6   | 5.52 | 5.65 | 4.17E+16 | 2.51E+17 |
| 92  | January 3, 1913    | 19130103_1339_000 | 13.657 | 41.868 | 4.53 | ≤ 5   | -     | -     | 39  | 44   | 0.086 | 0.005  | 6.151  | 10 | 230   | 5.17  | -    | -    | 6.24E+15 | 5.69E+16 |
| 93  | June 28, 1913      | 19130628_0853_000 | 16.239 | 39.531 | 5.64 | 6.4   | 4.29  | 8.06  | 75  | 151  | 0.054 | 0.0029 | 7.685  | 10 | 280   | 6.08  | 6.01 | 6.12 | 2.88E+17 | 1.32E+18 |
| 94  | July 21, 1913      | 19130721_2235_000 | 11.762 | 44.041 | 4.79 | 6.66  | 4.60  | 8.45  | 31  | 43   | 0.053 | 0.0082 | 5.376  | 10 | 220   | 4.79  | 4.73 | 4.83 | 1.53E+16 | 1.53E+16 |
| 95  | October 4, 1913    | 19131004_1826_000 | 14.716 | 41.513 | 5.35 | 9.84  | 7.47  | 11.86 | 91  | 205  | 0.046 | 0.006  | 6.385  | 10 | 300   | 5.43  | 5.38 | 5.46 | 1.06E+17 | 1.40E+17 |
| 96  | October 27, 1914   | 19141027_0922_000 | 10.598 | 43.912 | 5.63 | 21.41 | 17.91 | 25.72 | 148 | 660  | 0.032 | 0.0021 | 6.538  | 10 | 320   | 5.65  | 5.62 | 5.69 | 2.79E+17 | 2.99E+17 |
| 97  | January 13, 1915   | 19150113_0652_000 | 13.53  | 42.014 | 7.08 | 10.88 | 8.55  | 13.11 | 427 | 1041 | 0.044 | 0.0036 | 9.211* | 8  | 360   | 6.68* | 6.64 | 6.72 | 4.17E+19 | 1.05E+19 |
| 98  | March 26, 1915     | 19150326_2337_000 | 12.463 | 43.078 | 4.55 | 6.61  | 4.60  | 8.45  | 37  | 40   | 0.053 | 0.01   | 4.894  | 10 | 210   | 4.52  | 4.46 | 4.56 | 6.68E+15 | 6.03E+15 |
| 99  | August 16, 1916    | 19160816_0706_000 | 12.737 | 44.019 | 5.82 | ≤ 5   | -     | -     | 193 | 257  | 0.06  | 0.0057 | 7.986  | 10 | 190   | 6.2   | -    | -    | 5.37E+17 | 2.00E+18 |
| 100 | April 26, 1917     | 19170426_0935_000 | 12.129 | 43.467 | 5.99 | ≤ 5   | -     | -     | 70  | 134  | 0.084 | 0.0096 | 7.796  | 10 | 290   | 6.1   | -    | -    | 9.66E+17 | 1.41E+18 |
| 101 | November 10, 1918  | 19181110_1512_000 | 11.933 | 43.917 | 5.96 | ≤ 5   | -     | -     | 156 | 187  | 0.067 | 0.0048 | 8.043  | 10 | 340   | 6.23  | -    | -    | 8.71E+17 | 2.21E+18 |
| 102 | June 29, 1919      | 19190629_1506_000 | 11.482 | 43.957 | 6.38 | 22.71 | 18.92 | 27.40 | 353 | 565  | 0.031 | 0.0063 | 7.674  | 10 | 350   | 6.3   | 6.27 | 6.33 | 3.72E+18 | 2.82E+18 |
| 103 | September 10, 1919 | 19190910_1657_000 | 11.788 | 42.793 | 5.36 | ≤ 5   | -     | -     | 43  | 67   | 0.084 | 0.0071 | 7.411  | 10 | 250   | 5.88  | -    | -    | 1.10E+17 | 6.61E+17 |
| 104 | September 7, 1920  | 19200907_0555_000 | 10.278 | 44.185 | 6.53 | 5.08  | 3.23  | 6.68  | 416 | 750  | 0.058 | 0.0017 | 8.926  | 10 | 360   | 6.73* | 6.65 | 6.78 | 6.24E+18 | 1.24E+19 |
| 105 | June 8, 1922       | 19220608_0747_000 | 13.286 | 43.148 | 4.73 | 5.25  | 3.47  | 7.00  | 38  | 47   | 0.057 | 0.0047 | 6.266  | 10 | 280   | 5.25  | 5.17 | 5.30 | 1.24E+16 | 7.50E+16 |
| 106 | December 29, 1922  | 19221229_1222_000 | 13.632 | 41.793 | 5.24 | 14.49 | 11.83 | 17.07 | 74  | 119  | 0.039 | 0.003  | 6.337  | 10 | 330   | 5.47  | 5.43 | 5.50 | 7.24E+16 | 1.60E+17 |
| 107 | December 12, 1924  | 19241212_0329_000 | 12.982 | 46.462 | 5.42 | 11.18 | 8.55  | 13.11 | 35  | 78   | 0.044 | 0.0066 | 6.586  | 10 | 190   | 5.56  | 5.51 | 5.59 | 1.35E+17 | 2.19E+17 |
| 108 | May 25, 1927       | 19270525_0250_000 | 14.624 | 41.25  | 4.98 | 7.94  | 5.68  | 9.75  | 36  | 54   | 0.05  | 0.0062 | 6.087  | 10 | 260   | 5.22  | 5.16 | 5.26 | 2.95E+16 | 6.76E+16 |
| 109 | October 11, 1927   | 19271011_1445_000 | 13.466 | 41.841 | 5.2  | ≤ 5   | -     | -     | 44  | 81   | 0.069 | 0.0058 | 6.966  | 10 | 250   | 5.63  | -    | -    | 6.31E+16 | 2.79E+17 |
| 110 | October 28, 1927   | 19271028_2149_000 | 9.59   | 44.52  | 4.66 | 6.93  | 4.94  | 8.86  | 33  | 39   | 0.052 | 0.0051 | 5.63   | 10 | 190   | 4.94  | 4.88 | 4.99 | 9.77E+15 | 2.57E+16 |
| 111 | March 27, 1928     | 19280327_0832_000 | 12.975 | 46.372 | 6.02 | ≤ 5   | -     | -     | 171 | 359  | 0.076 | 0.0064 | 7.475  | 10 | 330   | 5.92  | -    | -    | 1.07E+18 | 7.59E+17 |
| 112 | April 10, 1929     | 19290410_0543_000 | 11.387 | 44.445 | 5.05 | ≤ 5   | -     | -     | 35  | 87   | 0.06  | 0.0086 | 6.227  | 10 | 220   | 5.22  | -    | -    | 3.76E+16 | 6.76E+16 |
| 113 | April 19, 1929     | 19290419_0415_000 | 11.202 | 44.496 | 5.13 | 10.05 | 7.99  | 12.47 | 31  | 82   | 0.045 | 0.0084 | 5.919  | 10 | 180   | 5.17  | 5.13 | 5.21 | 4.95E+16 | 5.69E+16 |
| 114 | April 20, 1929     | 19290420_0109_000 | 11.15  | 44.481 | 5.36 | 6.7   | 4.60  | 8.45  | 46  | 109  | 0.053 | 0.0049 | 6.457  | 10 | 200   | 5.4   | 5.33 | 5.44 | 1.10E+17 | 1.26E+17 |
| 115 | July 18, 1929      | 19290718_2102_000 | 11.507 | 43.988 | 4.96 | ≤ 5   | -     | -     | 41  | 56   | 0.064 | 0.0066 | 6.573  | 10 | 250   | 5.41  | -    | -    | 2.75E+16 | 1.30E+17 |
| 116 | July 23, 1930      | 19300723_0008_000 | 15.318 | 41.068 | 6.67 | 12.25 | 9.76  | 14.54 | 155 | 547  | 0.042 | 0.0087 | 8.6*   | 9  | 340   | 6.47* | 6.43 | 6.50 | 1.01E+19 | 5.07E+18 |
| 117 | October 30, 1930   | 19301030_0713_000 | 13.385 | 43.689 | 5.83 | 63.17 | 48.16 | 72.40 | 99  | 268  | 0.012 | 0.0058 | 7.032  | 10 | 190   | 6.12  | 6.08 | 6.15 | 5.56E+17 | 1.51E+18 |
| 118 | April 14, 1931     | 19310414_2213_000 | 10.666 | 45.974 | 4.77 | 12.55 | 10.42 | 15.33 | 74  | 160  | 0.041 | 0.0034 | 5.435  | 10 | 290</ |       |      |      |          |          |

|     |                    |                   |        |        |      |       |       |       |     |     |       |        |        |    |     |       |      |      |          |          |
|-----|--------------------|-------------------|--------|--------|------|-------|-------|-------|-----|-----|-------|--------|--------|----|-----|-------|------|------|----------|----------|
| 126 | December 17, 1937  | 19371217_0311_000 | 6.586  | 44.67  | 4.41 | ≤ 5   | -     | -     | 64  | 64  | 0.073 | 0.009  | 5.146  | 10 | 230 | 4.61  | -    | -    | 4.12E+15 | 8.22E+15 |
| 127 | July 18, 1938      | 19380718_0057_000 | 6.582  | 44.612 | 5.07 | ≤ 5   | -     | -     | 115 | 381 | 0.07  | 0.0078 | 6.372  | 10 | 270 | 5.3   | -    | -    | 4.03E+16 | 8.91E+16 |
| 128 | October 16, 1940   | 19401016_1317_000 | 11.867 | 42.885 | 5.29 | ≤ 5   | -     | -     | 74  | 106 | 0.072 | 0.0038 | 7.037  | 10 | 280 | 5.67  | -    | -    | 8.61E+16 | 3.20E+17 |
| 129 | October 3, 1943    | 19431003_0828_000 | 13.626 | 42.94  | 5.67 | 8.51  | 6.52  | 10.74 | 154 | 170 | 0.048 | 0.0047 | 7.186  | 10 | 350 | 5.85  | 5.80 | 5.89 | 3.20E+17 | 5.96E+17 |
| 130 | February 17, 1947  | 19470217_0012_000 | 6.761  | 44.449 | 4.74 | 8.84  | 6.52  | 10.74 | 85  | 283 | 0.048 | 0.0054 | 5.518  | 10 | 230 | 4.92  | 4.87 | 4.96 | 1.29E+16 | 2.40E+16 |
| 131 | May 11, 1947       | 19470511_0632_000 | 16.518 | 38.652 | 5.7  | 16.62 | 14.23 | 20.22 | 130 | 254 | 0.036 | 0.003  | 7.716  | 10 | 200 | 6.27  | 6.24 | 6.30 | 3.55E+17 | 2.54E+18 |
| 132 | June 13, 1948      | 19480613_0633_000 | 12.127 | 43.598 | 5.04 | ≤ 5   | -     | -     | 65  | 142 | 0.085 | 0.0085 | 6.864  | 10 | 280 | 5.57  | -    | -    | 3.63E+16 | 2.26E+17 |
| 133 | December 31, 1948  | 19481231_0332_000 | 12.853 | 42.507 | 5.42 | ≤ 5   | -     | -     | 60  | 95  | 0.075 | 0.0067 | 6.691  | 10 | 250 | 5.48  | -    | -    | 1.35E+17 | 1.66E+17 |
| 134 | September 5, 1950  | 19500905_0408_000 | 13.457 | 42.547 | 5.69 | 16.42 | 13.40 | 19.08 | 252 | 386 | 0.037 | 0.0017 | 7.562  | 10 | 360 | 6.18  | 6.14 | 6.21 | 3.43E+17 | 1.86E+18 |
| 135 | May 15, 1951       | 19510515_2254_000 | 9.62   | 45.226 | 5.17 | 70.06 | 50.46 | 72.40 | 51  | 179 | 0.011 | 0.0023 | 6.051  | 10 | 260 | 5.59  | 5.53 | 5.60 | 5.69E+16 | 2.43E+17 |
| 136 | August 8, 1951     | 19510808_1956_000 | 13.461 | 42.466 | 5.25 | 10.22 | 7.99  | 12.47 | 53  | 94  | 0.045 | 0.0056 | 7.024  | 10 | 280 | 5.79  | 5.75 | 5.83 | 7.50E+16 | 4.84E+17 |
| 137 | September 1, 1951  | 19510901_0656_000 | 13.288 | 43.029 | 5.25 | 10.91 | 8.55  | 13.11 | 34  | 80  | 0.044 | 0.0048 | 7.281  | 10 | 250 | 5.95  | 5.90 | 5.98 | 7.50E+16 | 8.41E+17 |
| 138 | January 18, 1952   | 19520118_0136_000 | 12.542 | 45.995 | 4.44 | 5.17  | 3.47  | 7.00  | 78  | 108 | 0.057 | 0.0034 | 4.828  | 10 | 260 | 4.44  | 4.37 | 4.49 | 4.57E+15 | 4.57E+15 |
| 139 | July 4, 1952       | 19520704_2035_000 | 11.883 | 43.98  | 4.94 | ≤ 5   | -     | -     | 63  | 64  | 0.082 | 0.0059 | 6.947  | 10 | 240 | 5.62  | -    | -    | 2.57E+16 | 2.69E+17 |
| 140 | December 14, 1953  | 19531214_0711_000 | 12.061 | 44.064 | 4.7  | ≤ 5   | -     | -     | 47  | 48  | 0.082 | 0.0079 | 5.768  | 10 | 240 | 4.96  | -    | -    | 1.12E+16 | 2.75E+16 |
| 141 | June 20, 1955      | 19550620_0447_000 | 7.144  | 44.525 | 4.77 | 11.74 | 9.14  | 13.80 | 60  | 104 | 0.043 | 0.0086 | 5.766  | 10 | 250 | 5.11  | 5.07 | 5.14 | 1.43E+16 | 4.62E+16 |
| 142 | July 23, 1955      | 19550723_0354_000 | 12.711 | 46.187 | 4.49 | ≤ 5   | -     | -     | 43  | 47  | 0.081 | 0.0063 | 4.843  | 10 | 250 | 4.44  | -    | -    | 5.43E+15 | 4.57E+15 |
| 143 | April 26, 1956     | 19560426_0300_000 | 11.33  | 44.209 | 4.74 | ≤ 5   | -     | -     | 72  | 89  | 0.089 | 0.0046 | 5.957  | 10 | 260 | 5.07  | -    | -    | 1.29E+16 | 4.03E+16 |
| 144 | May 26, 1956       | 19560526_1840_000 | 11.897 | 43.939 | 4.99 | ≤ 5   | -     | -     | 63  | 76  | 0.086 | 0.0096 | 6.828  | 10 | 260 | 5.55  | -    | -    | 3.05E+16 | 2.11E+17 |
| 145 | June 1, 1956       | 19560601_0832_000 | 7.291  | 44.72  | 4.3  | ≤ 5   | -     | -     | 62  | 62  | 0.071 | 0.0065 | 4.396  | 10 | 240 | 4.19  | -    | -    | 2.82E+15 | 1.93E+15 |
| 146 | April 30, 1957     | 19570430_0605_000 | 12.013 | 43.733 | 4.23 | ≤ 5   | -     | -     | 51  | 57  | 0.073 | 0.0097 | 4.67   | 10 | 280 | 4.35  | -    | -    | 2.21E+15 | 3.35E+15 |
| 147 | August 27, 1957    | 19570827_1154_000 | 10.995 | 44.395 | 4.73 | ≤ 5   | -     | -     | 35  | 58  | 0.071 | 0.0092 | 5.299  | 10 | 200 | 4.7   | -    | -    | 1.24E+16 | 1.12E+16 |
| 148 | December 6, 1957   | 19571206_0454_000 | 12.029 | 42.707 | 4.97 | ≤ 5   | -     | -     | 62  | 63  | 0.096 | 0.0027 | 6.778  | 10 | 230 | 5.53  | -    | -    | 2.85E+16 | 1.97E+17 |
| 149 | June 24, 1958      | 19580624_0607_000 | 13.498 | 42.317 | 5.04 | ≤ 5   | -     | -     | 87  | 222 | 0.065 | 0.0037 | 6.43   | 10 | 290 | 5.33  | -    | -    | 3.63E+16 | 9.89E+16 |
| 150 | October 27, 1958   | 19581027_1009_000 | 16.488 | 38.992 | 4.59 | 8.91  | 6.52  | 10.74 | 49  | 62  | 0.048 | 0.009  | 5.523  | 10 | 200 | 4.93  | 4.87 | 4.96 | 7.67E+15 | 2.48E+16 |
| 151 | April 5, 1959      | 19590405_1048_000 | 6.764  | 44.522 | 5.39 | ≤ 5   | -     | -     | 106 | 207 | 0.071 | 0.0047 | 6.854  | 10 | 290 | 5.57  | -    | -    | 1.22E+17 | 2.26E+17 |
| 152 | April 26, 1959     | 19590426_1445_000 | 13.021 | 46.484 | 5.21 | ≤ 5   | -     | -     | 97  | 122 | 0.09  | 0.0034 | 7.218  | 10 | 210 | 5.77  | -    | -    | 6.53E+16 | 4.52E+17 |
| 153 | December 23, 1959  | 19591223_0929_000 | 14.908 | 37.357 | 5.11 | 11.41 | 9.14  | 13.80 | 45  | 108 | 0.043 | 0.0084 | 6.086  | 10 | 230 | 5.29  | 5.25 | 5.32 | 4.62E+16 | 8.61E+16 |
| 154 | March 24, 1961     | 19610324_1036_000 | 15.654 | 38.174 | 4.62 | 20.59 | 16.94 | 24.18 | 44  | 59  | 0.033 | 0.0019 | 5.657  | 10 | 200 | 5.15  | 5.12 | 5.18 | 8.51E+15 | 5.31E+16 |
| 155 | May 8, 1961        | 19610508_2245_000 | 11.962 | 44.134 | 4.37 | ≤ 5   | -     | -     | 37  | 40  | 0.069 | 0.0062 | 5.198  | 10 | 190 | 4.64  | -    | -    | 3.59E+15 | 9.12E+15 |
| 156 | November 23, 1961  | 19611123_0112_000 | 9.589  | 45.76  | 4.86 | ≤ 5   | -     | -     | 70  | 119 | 0.059 | 0.006  | 5.865  | 10 | 330 | 5.01  | -    | -    | 1.95E+16 | 3.27E+16 |
| 157 | August 21, 1962    | 19620821_1819_000 | 14.953 | 41.23  | 6.15 | ≤ 5   | -     | -     | 291 | 562 | 0.07  | 0.0061 | 8.601  | 10 | 360 | 6.55* | -    | -    | 1.68E+18 | 6.68E+18 |
| 158 | April 3, 1967      | 19670403_1636_000 | 10.602 | 44.73  | 4.44 | ≤ 5   | -     | -     | 41  | 45  | 0.092 | 0.0072 | 5.634  | 10 | 180 | 4.88  | -    | -    | 4.57E+15 | 2.09E+16 |
| 159 | October 31, 1967   | 19671031_2108_000 | 14.413 | 37.862 | 5.33 | ≤ 5   | -     | -     | 37  | 60  | 0.061 | 0.0099 | 8.053  | 10 | 230 | 6.24  | -    | -    | 9.89E+16 | 2.29E+18 |
| 160 | January 15, 1968   | 19680115_0201_000 | 12.981 | 37.756 | 6.41 | ≤ 5   | -     | -     | 87  | 162 | 0.07  | 0.0108 | 9.153* | 8  | 280 | 6.42* | -    | -    | 4.12E+18 | 4.27E+18 |
| 161 | January 25, 1968   | 19680125_0956_000 | 13.06  | 37.71  | 5.37 | 12.99 | 10.42 | 15.33 | 31  | 32  | 0.041 | 0.0052 | 7.756  | 10 | 190 | 6.24  | 6.21 | 6.27 | 1.14E+17 | 2.29E+18 |
| 162 | April 18, 1968     | 19680418_1938_000 | 8.037  | 44.051 | 4.93 | 12.06 | 9.76  | 14.54 | 37  | 51  | 0.042 | 0.0082 | 5.797  | 10 | 190 | 5.13  | 5.10 | 5.17 | 2.48E+16 | 4.95E+16 |
| 163 | January 6, 1969    | 19690106_2203_000 | 10.727 | 44.049 | 4.67 | 7.72  | 5.68  | 9.75  | 63  | 74  | 0.05  | 0.0052 | 5.749  | 10 | 210 | 5.03  | 4.97 | 5.07 | 1.01E+16 | 3.51E+16 |
| 164 | July 2, 1969       | 19690702_0755_000 | 12.002 | 42.168 | 4.77 | ≤ 5   | -     | -     | 69  | 72  | 0.101 | 0.0095 | 6.261  | 10 | 260 | 5.24  | -    | -    | 1.43E+16 | 7.24E+16 |
| 165 | August 9, 1969     | 19690809_0920_000 | 11.962 | 43.76  | 4.2  | ≤ 5   | -     | -     | 31  | 33  | 0.098 | 0.0053 | 5.692  | 10 | 190 | 4.92  | -    | -    | 2.00E+15 | 2.40E+16 |
| 166 | August 11, 1969    | 19690811_1355_000 | 12.227 | 43.036 | 4.7  | ≤ 5   | -     | -     | 41  | 46  | 0.085 | 0.0049 | 6.922  | 10 | 240 | 5.61  | -    | -    | 1.12E+16 | 2.60E+17 |
| 167 | September 26, 1969 | 19690926_2340_000 | 13.567 | 42.707 | 4.39 | 5.3   | 3.47  | 7.00  | 52  | 97  | 0.057 | 0.0078 | 5.402  | 10 | 300 | 4.76  | 4.69 | 4.82 | 3.85E+15 | 1.38E+16 |
| 168 | December 31, 1970  | 19701231_2204_000 | 8.137  | 44.138 | 4.62 | 6.77  | 4.60  | 8.45  | 46  | 79  | 0.053 | 0.0047 | 5.764  | 10 | 200 | 5.01  | 4.94 | 5.05 | 8.51E+15 | 3.27E+16 |
| 169 | February 6, 1971   | 19710206_1809_000 | 11.846 | 42.442 | 4.83 | ≤ 5   | -     | -     | 68  | 89  | 0.098 | 0.0077 | 6.975  | 10 | 280 | 5.64  | -    | -    | 1.76E+16 | 2.88E+17 |
| 170 | February 11, 1971  | 19710211_1849_000 | 12.604 | 43.121 | 4.61 | 6.54  | 4.60  | 8.45  | 38  | 71  | 0.053 | 0.0084 | 5.471  | 10 | 180 | 4.84  | 4.78 | 4.89 | 8.22E+15 | 1.82E+16 |
| 171 | February 12, 1971  | 19710212_0454_000 | 12.605 | 43.15  | 4.89 | ≤ 5   | -     | -     | 30  | 47  | 0.066 | 0.0082 | 6.259  | 10 | 180 | 5.23  | -    | -    | 2.16E+16 | 7.00E+16 |
| 172 | April 2, 1971      | 19710402_0143_000 | 13.054 | 42.746 | 4.5  | 5.71  | 3.72  | 7.33  | 42  | 68  | 0.056 | 0.0085 | 5.907  | 10 | 230 | 5.06  | 4.98 | 5.11 | 5.62E+15 | 3.89E+16 |
| 173 | May 6, 1971        | 19710506_0345_000 | 15.275 | 41.169 | 4.83 | 19.32 | 15.99 | 22.75 | 54  | 68  | 0.034 | 0.0023 | 5.592  | 10 | 260 | 5.1   | 5.07 | 5.13 | 1.76E+16 | 4.47E+16 |
| 174 | July 15, 1971      | 19710715_0133_000 | 10.345 | 44.814 | 5.51 | 6.95  | 4.94  | 8.86  | 107 | 228 | 0.052 | 0.0047 | 7.52   | 10 | 330 | 6     | 5.94 | 6.04 | 1.84E+17 | 1.00E+18 |
| 175 | November 26, 1972  | 19721126_1603_000 | 13.454 | 42.967 | 5.48 | ≤ 5   | -     | -     | 46  | 73  | 0.063 | 0.0073 | 7.822  | 10 | 260 | 6.11  | -    | -    | 1.66E+17 | 1.46E+18 |
| 176 | January 16, 1975   | 19750116_0009_000 | 15.643 | 38.114 | 5.18 | ≤ 5   | -     | -     | 239 | 346 | 0.091 | 0.0052 | 7.849  | 10 | 310 | 6.13  | -    | -    | 5.89E+16 | 1.57E+18 |
| 177 | May 6, 1976        | 19760506_2000_000 | 13.119 | 46.241 | 6.45 | ≤ 5   | -     | -     | 553 | 770 | 0.064 | 0.0019 | 8.771  | 10 | 360 | 6.64* | -    | -    | 4.73E+18 | 9.12E+18 |
| 178 | September 17, 1976 | 19760917_0123_000 | 14.276 | 37.854 | 4.55 | 34.23 | 28.54 | 46.57 | 38  | 40  | 0.023 | 0.0053 | 5.297  | 10 | 220 | 5.04  | 5.01 | 5.10 | 6.68E+15 | 3.63E+16 |
| 179 | December 13, 1976  | 19761213_0524_000 | 10.799 | 45.894 | 4.9  | ≤ 5   | -     | -     | 97  | 128 | 0.063 | 0.004  | 6.2    | 10 | 350 | 5.2   | -    | -    | 2.24E+16 | 6.31E+16 |
| 180 | June 5, 1977       | 19770605_1359_000 | 14.344 | 37.893 | 4.61 | ≤ 5   | -     | -     | 66  | 108 | 0.068 | 0.0072 | 5.857  | 10 | 310 | 5.01  | -    | -    | 8.22E+15 | 3.27E+16 |
| 181 | July 24, 1977      | 19770724_0955_000 | 15.02  | 41.097 | 4.37 | ≤ 5   | -     | -     | 78  | 85  | 0.095 | 0.0071 | 5.435  | 10 | 290 | 4.77  | -    | -    | 3.59E+15 | 1.43E+16 |
| 182 | September 16, 1977 | 19770916_2348_000 | 13.019 | 46.283 | 5.26 | ≥ 73  | -     | -     | 61  | 94  | 0.003 | 0.0051 | 5.422  | 10 | 260 | 5.25  | -    | -    | 7.76E+16 | 7.50E+16 |
| 183 | February 8, 1978   | 19780208_0410_000 | 14.991 | 41.106 | 4.44 | ≤ 5   | -     | -     | 97  | 100 | 0.096 | 0.005  | 5.513  | 10 | 340 | 4.82  | -    | -    | 4.57E+15 | 1.70E+16 |
| 184 | March 11, 1978     | 19780311_1920_000 | 16.073 | 38.055 | 5.22 | 7.76  | 5.68  | 9.75  | 73  | 126 | 0.05  | 0.0042 | 6.902  | 10 |     |       |      |      |          |          |

|     |                   |                   |        |        |      |       |       |       |     |      |       |        |        |    |     |      |      |      |          |          |
|-----|-------------------|-------------------|--------|--------|------|-------|-------|-------|-----|------|-------|--------|--------|----|-----|------|------|------|----------|----------|
| 191 | January 5, 1980   | 19800105_1432_000 | 7.319  | 45.013 | 4.82 | 15.52 | 12.60 | 18.04 | 82  | 120  | 0.038 | 0.0043 | 6.199  | 10 | 290 | 5.4  | 5.37 | 5.43 | 1.70E+16 | 1.26E+17 |
| 192 | January 23, 1980  | 19800123_2100_000 | 14.807 | 36.904 | 4.39 | 11.36 | 9.14  | 13.80 | 62  | 122  | 0.043 | 0.0033 | 5.142  | 10 | 280 | 4.76 | 4.72 | 4.79 | 3.85E+15 | 1.38E+16 |
| 193 | February 28, 1980 | 19800228_2104_000 | 12.967 | 42.8   | 4.97 | 19.31 | 15.99 | 22.75 | 86  | 146  | 0.034 | 0.0072 | 5.783  | 10 | 270 | 5.21 | 5.18 | 5.24 | 2.85E+16 | 6.53E+16 |
| 194 | May 24, 1980      | 19800524_2016_000 | 13.19  | 43.087 | 4.48 | 26.15 | 22.19 | 33.25 | 55  | 58   | 0.028 | 0.0036 | 4.981  | 10 | 220 | 4.82 | 4.79 | 4.86 | 5.25E+15 | 1.70E+16 |
| 195 | June 7, 1980      | 19800607_1835_000 | 10.564 | 44.07  | 4.64 | 7.65  | 5.68  | 9.75  | 91  | 102  | 0.05  | 0.004  | 6.25   | 10 | 230 | 5.31 | 5.25 | 5.35 | 9.12E+15 | 9.23E+16 |
| 196 | June 14, 1980     | 19800614_2056_000 | 13.696 | 41.905 | 4.96 | 48.08 | 38.10 | 70.71 | 60  | 69   | 0.017 | 0.0027 | 4.934  | 10 | 280 | 4.9  | 4.86 | 4.97 | 2.75E+16 | 2.24E+16 |
| 197 | October 1, 1980   | 19801001_0057_000 | 13.281 | 41.703 | 4.26 | ≤ 5   | -     | -     | 35  | 41   | 0.069 | 0.0043 | 5.483  | 10 | 240 | 4.8  | -    | -    | 2.45E+15 | 1.58E+16 |
| 198 | November 23, 1980 | 19801123_1834_000 | 15.283 | 40.842 | 6.81 | 11.59 | 9.14  | 13.80 | 244 | 1394 | 0.043 | 0.0089 | 8.685* | 9  | 350 | 6.5* | 6.46 | 6.54 | 1.64E+19 | 5.62E+18 |
| 199 | December 2, 1980  | 19801202_0558_000 | 6.371  | 45.67  | 4.8  | 7.58  | 5.29  | 9.29  | 206 | 292  | 0.051 | 0.0023 | 5.303  | 10 | 300 | 4.77 | 4.71 | 4.81 | 1.58E+16 | 1.43E+16 |
| 200 | February 14, 1981 | 19810214_1727_000 | 14.62  | 40.992 | 4.88 | 7.47  | 5.29  | 9.29  | 76  | 85   | 0.051 | 0.0029 | 7.107  | 10 | 270 | 5.78 | 5.72 | 5.82 | 2.09E+16 | 4.68E+17 |
| 201 | July 6, 1982      | 19820706_1437_000 | 15.11  | 37.707 | 3.27 | ≤ 5   | -     | -     | 149 | 150  | 0.133 | 0.0087 | 4.745  | 6  | 240 | 4.39 | -    | -    | 8.04E+13 | 3.85E+15 |
| 202 | September 1, 1982 | 19820901_1533_000 | 10.53  | 43.932 | 4.21 | ≤ 5   | -     | -     | 47  | 47   | 0.085 | 0.0047 | 5.605  | 10 | 190 | 4.87 | -    | -    | 2.07E+15 | 2.02E+16 |
| 203 | February 2, 1983  | 19830202_0814_000 | 15.655 | 40.638 | 4.35 | ≤ 5   | -     | -     | 42  | 42   | 0.081 | 0.0071 | 5.649  | 10 | 220 | 4.89 | -    | -    | 3.35E+15 | 2.16E+16 |
| 204 | February 10, 1983 | 19830210_2230_000 | 13.395 | 46.271 | 4.32 | ≥ 73  | -     | -     | 39  | 40   | 0.008 | 0.0037 | 4.847  | 10 | 210 | 4.93 | -    | -    | 3.02E+15 | 2.48E+16 |
| 205 | August 12, 1983   | 19830812_1936_000 | 14.045 | 41.655 | 4.76 | 31.71 | 25.85 | 40.63 | 49  | 53   | 0.025 | 0.0075 | 4.834  | 10 | 200 | 4.77 | 4.73 | 4.81 | 1.38E+16 | 1.43E+16 |
| 206 | November 9, 1983  | 19831109_1629_000 | 10.265 | 44.755 | 5.04 | 10.07 | 7.99  | 12.47 | 223 | 850  | 0.045 | 0.0031 | 6.493  | 10 | 360 | 5.49 | 5.45 | 5.53 | 3.63E+16 | 1.72E+17 |
