# Supplementary material for: Inferring the depth and magnitude of pre-instrumental earthquakes from intensity attenuation curves
Source: Copernicus journal article supplement (doi:10.5194/nhess-23-1007-2023), 2023-03-06
Supplement: Supplementary file 68 [file nhess-23-1007-2023-supplement.zip › nhess-2022-30-supplement-version3/Table_S2.pdf]

**Table S2.** Recalculation of magnitude and depth for the learning set events using the methodology proposed in this work. In the header "Lon" and "Lat" are the epicentral coordinates;  $I_E$  is the expected intensity at the epicenter; The unit of the steepness is intensity/km. Inferred hypocentral depth is calculated using Eq. 5. The  $M_w$  y-intercept is calculated using Eq. 4. Eq. 3 and Eq. 5 can be applied for a steepness interval  $0.058 \leq S \leq 0.010$ , which corresponds to the depth interval 5.0 - 73.0 km, respectively.

| ID | Event date  | Time (UTC) | Lon   | Lat   | Hypocentral depth (km) | $M_w$ (instrumental) | Steepness | $I_E$ | Inferred Hypocentral Depth (km) | $M_w$ (y-intercept this work) | MDP (within 55 km) | MDP source               |
|----|-------------|------------|-------|-------|------------------------|----------------------|-----------|-------|---------------------------------|-------------------------------|--------------------|--------------------------|
| 1  | 9-nov-1983  | 16:29:52   | 10.27 | 44.76 | 18.0                   | 5.0                  | 0.040     | 6.35  | 13.61                           | 5.47                          | 231                | CFTI5Med                 |
| 2  | 2-may-1987  | 20:43:53   | 10.69 | 44.81 | 3.0                    | 4.7                  | 0.061     | 6.52  | $\leq 5.00$                     | 5.38                          | 175                | DBMI15                   |
| 3  | 10-may-2000 | 16:52:11   | 11.93 | 44.24 | 13.1                   | 4.8                  | 0.068     | 4.75  | $\leq 5.00$                     | 4.39                          | 89                 | Gasparini et al. 2011    |
| 4  | 11-apr-2003 | 9:26:57    | 8.87  | 44.76 | 8.2                    | 4.8                  | 0.048     | 5.84  | 8.73                            | 5.10                          | 299                | Gasparini et al. 2011    |
| 5  | 14-sep-2003 | 21:42:53   | 11.38 | 44.26 | 20.1                   | 5.3                  | 0.033     | 5.74  | 20.09                           | 5.19                          | 100                | DBMI15                   |
| 6  | 26-mar-2008 | 9:19:30    | 9.81  | 44.34 | 72.2                   | 4.0                  | 0.017     | 4.13  | 48.86                           | 4.45                          | 27                 | HSIT                     |
| 7  | 23-dec-2008 | 15:24:22   | 10.35 | 44.54 | 22.9                   | 4.9                  | 0.045     | 5.67  | 10.31                           | 5.04                          | 85                 | HSIT                     |
| 8  | 5-apr-2009  | 20:20:53   | 11.91 | 44.23 | 24.5                   | 4.5                  | 0.021     | 4.2   | 39.12                           | 4.45                          | 61                 | HSIT                     |
| 9  | 19-apr-2009 | 12:39:50   | 7.87  | 44.74 | 45.3                   | 4.2                  | 0.012     | 3.57  | 64.50                           | 4.19                          | 200                | HSIT                     |
| 10 | 13-oct-2010 | 22:43:14   | 12.38 | 44.21 | 26.5                   | 4.0                  | 0.023     | 3.94  | 35.01                           | 4.29                          | 64                 | HSIT                     |
| 11 | 25-jan-2012 | 8:06:37    | 10.51 | 44.87 | 29.0                   | 4.9                  | 0.027     | 4.8   | 28.03                           | 4.73                          | 160                | HSIT                     |
| 12 | 27-jan-2012 | 14:53:13   | 10.01 | 44.52 | 72.4                   | 4.9                  | 0.007     | 4.24  | $\geq 73.00$                    | 4.59                          | 112                | HSIT                     |
| 13 | 20-may-2012 | 2:03:52    | 11.26 | 44.90 | 6.3                    | 5.9                  | 0.052     | 6.73  | 6.99                            | 5.56                          | 207                | HSIT                     |
| 14 | 29-may-2012 | 7:00:03    | 11.07 | 44.84 | 8.1                    | 5.7                  | 0.062     | 7.14  | $\leq 5.00$                     | 5.73                          | 164                | HSIT                     |
| 15 | 29-may-2012 | 10:55:57   | 10.98 | 44.87 | 8.7                    | 5.3                  | 0.059     | 6.62  | $\leq 5.00$                     | 5.44                          | 118                | HSIT                     |
| 16 | 3-jun-2012  | 19:20:43   | 10.95 | 44.89 | 8.7                    | 4.8                  | 0.045     | 5.68  | 10.31                           | 5.04                          | 167                | HSIT                     |
| 17 | 6-jun-2012  | 4:08:31    | 12.32 | 44.40 | 31.1                   | 4.0                  | 0.023     | 4.19  | 35.01                           | 4.43                          | 55                 | HSIT                     |
| 18 | 25-jan-2013 | 14:48:18   | 10.45 | 44.16 | 19.8                   | 4.8                  | 0.016     | 4.42  | 51.65                           | 4.62                          | 142                | HSIT                     |
| 19 | 18-nov-2018 | 12:48:46   | 12.49 | 44.05 | 36.8                   | 4.0                  | 0.005     | 3.53  | $\geq 73.00$                    | 4.19                          | 90                 | HSIT                     |
| 20 | 14-jan-2019 | 23:03:56   | 12.32 | 44.37 | 20.6                   | 4.3                  | 0.031     | 4.47  | 22.45                           | 4.50                          | 60                 | HSIT                     |
| 21 | 5-may-1990  | 7:21:29    | 15.74 | 40.74 | 18.8                   | 5.8                  | 0.022     | 6.38  | 37.01                           | 5.66                          | 139                | DBMI15                   |
| 22 | 26-may-1991 | 12:25:59   | 15.82 | 40.69 | 18.0                   | 5.1                  | 0.036     | 6.39  | 17.00                           | 5.52                          | 137                | DBMI15                   |
| 23 | 15-oct-1996 | 9:55:59    | 10.68 | 44.80 | 15.0                   | 5.4                  | 0.040     | 6.36  | 13.61                           | 5.47                          | 101                | DBMI15                   |
| 24 | 26-sep-1997 | 9:40:26    | 12.85 | 43.01 | 8.0                    | 6.0                  | 0.046     | 7.71  | 9.75                            | 6.17                          | 135                | DBMI15                   |
| 25 | 26-mar-1998 | 16:26:17   | 12.80 | 43.14 | 51.0                   | 5.2                  | 0.014     | 5.52  | 57.71                           | 5.26                          | 82                 | DBMI15                   |
| 26 | 9-sep-1998  | 11:28:00   | 15.95 | 40.06 | 29.2                   | 5.6                  | 0.025     | 5.96  | 31.33                           | 5.40                          | 115                | Gasparini et al. 2011    |
| 27 | 31-oct-2002 | 10:32:59   | 14.89 | 41.72 | 16.0                   | 5.8                  | 0.048     | 6.88  | 8.72                            | 5.68                          | 173                | Gasparini et al. 2011    |
| 28 | 1-nov-2002  | 15:09:01   | 14.84 | 41.74 | 18.0                   | 5.8                  | 0.044     | 6.35  | 10.90                           | 5.43                          | 165                | Gasparini et al. 2011    |
| 29 | 21-oct-2006 | 7:04:10    | 12.89 | 43.63 | 32.3                   | 4.2                  | 0.027     | 4.9   | 28.03                           | 4.78                          | 66                 | HSIT                     |
| 30 | 6-apr-2009  | 1:32:40    | 13.38 | 42.34 | 8.6                    | 6.1                  | 0.043     | 6.92  | 11.52                           | 5.75                          | 313                | Galli et al. 2009        |
| 31 | 20-sep-2009 | 3:50:17    | 13.42 | 43.40 | 34.0                   | 4.5                  | 0.004     | 4.06  | $\geq 73.00$                    | 4.49                          | 128                | HSIT                     |
| 32 | 15-oct-2010 | 5:21:19    | 16.63 | 38.88 | 37.2                   | 4.3                  | 0.027     | 3.84  | 28.03                           | 4.19                          | 62                 | HSIT                     |
| 33 | 28-aug-2012 | 23:12:15   | 15.73 | 38.20 | 48.9                   | 4.5                  | 0.015     | 4.21  | 54.59                           | 4.52                          | 91                 | HSIT                     |
| 34 | 25-oct-2012 | 23:05:24   | 16.02 | 39.88 | 9.7                    | 5.2                  | 0.035     | 5.13  | 17.97                           | 4.83                          | 97                 | HSIT                     |
| 35 | 5-dec-2012  | 1:18:20    | 13.66 | 42.91 | 23.1                   | 4.1                  | 0.049     | 4.44  | 8.25                            | 4.31                          | 119                | HSIT                     |
| 36 | 16-feb-2013 | 21:16:09   | 13.57 | 41.71 | 18.6                   | 4.8                  | 0.025     | 4.77  | 31.32                           | 4.73                          | 191                | HSIT                     |
| 37 | 29-dec-2013 | 17:08:43   | 14.44 | 41.39 | 20.4                   | 5.0                  | 0.035     | 5.07  | 17.97                           | 4.80                          | 219                | HSIT                     |
| 38 | 24-aug-2016 | 1:36:32    | 13.23 | 42.70 | 7.9                    | 6.0                  | 0.040     | 6.99  | 13.61                           | 5.82                          | 142                | Tertulliani et al. 2016a |
| 39 | 30-oct-2016 | 6:40:17    | 13.11 | 42.83 | 7.3                    | 6.5                  | 0.051     | 8.06  | 7.39                            | 6.31                          | 236                | Tertulliani et al. 2016b |
| 40 | 18-jan-2017 | 10:14:09   | 13.28 | 42.53 | 8.4                    | 5.5                  | 0.034     | 7.26  | 19.00                           | 6.03                          | 66                 | Azzaro et al. 2017       |
| 41 | 16-aug-2018 | 18:19:04   | 14.87 | 41.87 | 19.6                   | 5.1                  | 0.041     | 5.27  | 12.87                           | 4.85                          | 110                | HSIT                     |
| 42 | 6-oct-2018  | 0:34:19    | 14.88 | 37.63 | 5.5                    | 4.6                  | 0.060     | 5.11  | $\leq 5.00$                     | 4.59                          | 71                 | HSIT                     |
