# Supplementary figures and images for: Inferring the depth and magnitude of pre-instrumental earthquakes from intensity attenuation curves (part 1 of 3)
Source: Copernicus journal article supplement (doi:10.5194/nhess-23-1007-2023), 2023-03-06

# DBMI\_ 19100607\_0204\_000 | 1910-06-07 – Irpinia–Basilicata

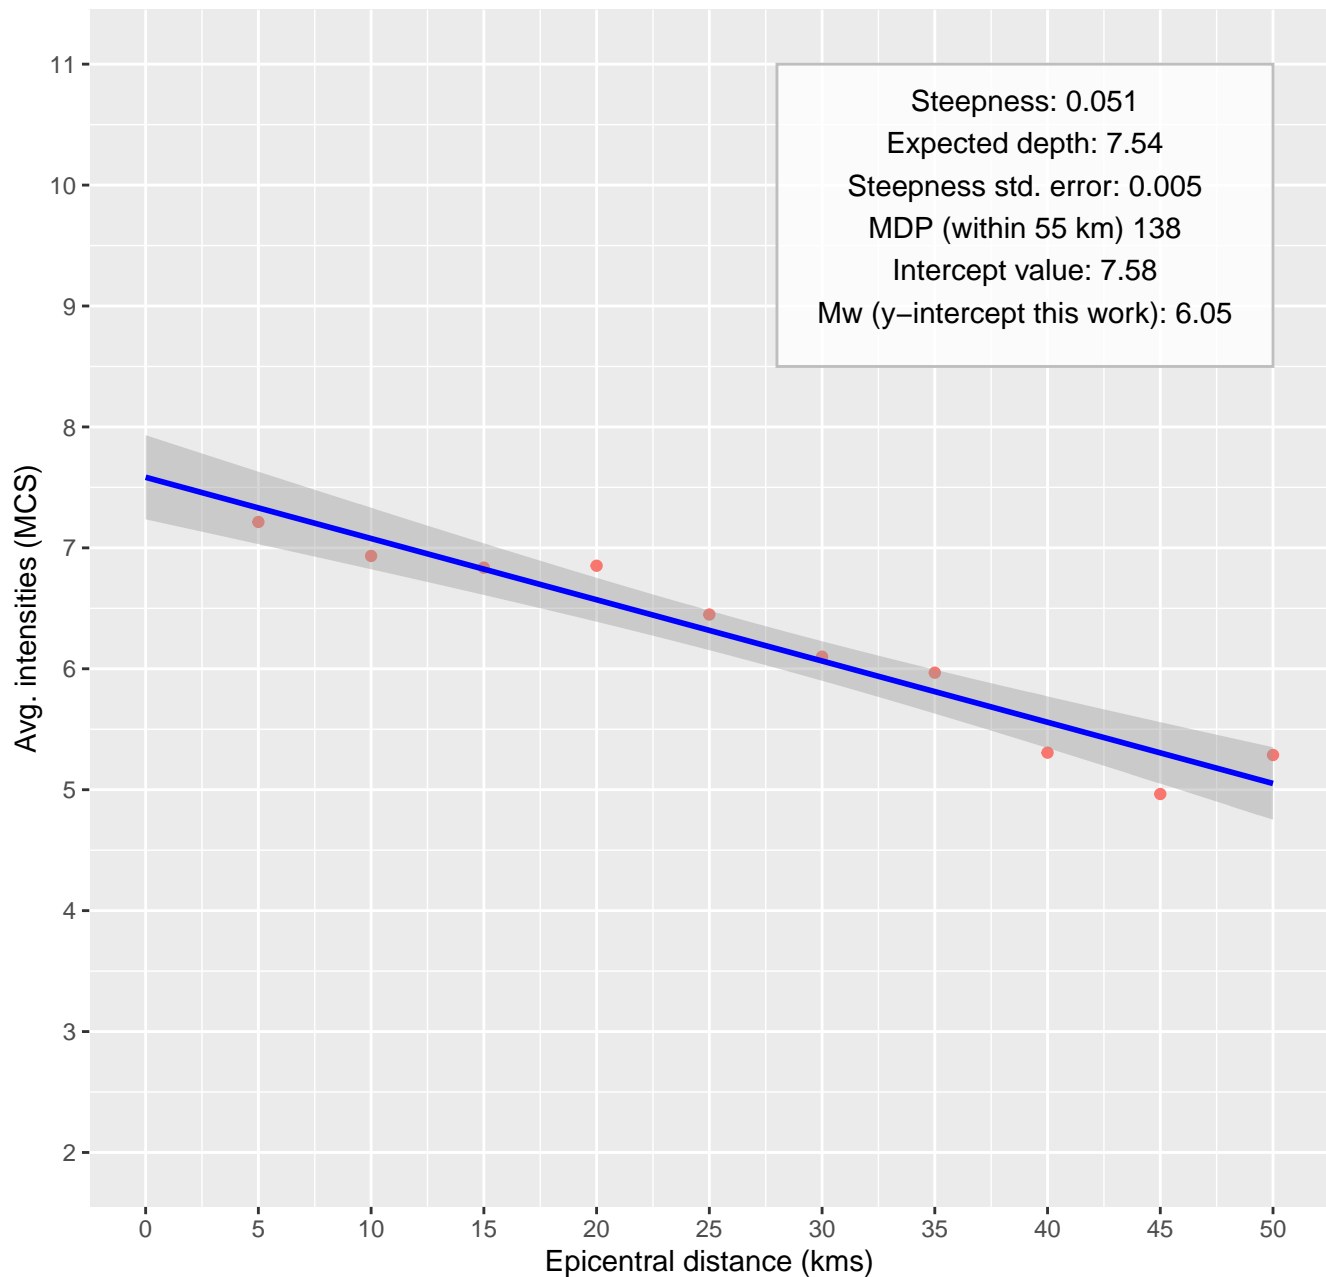

Supplement: Supplementary file 1 [file nhess-23-1007-2023-supplement.zip]

# DBMI\_ 19761213\_0524\_000 | 1976-12-13 – Garda settentrionale

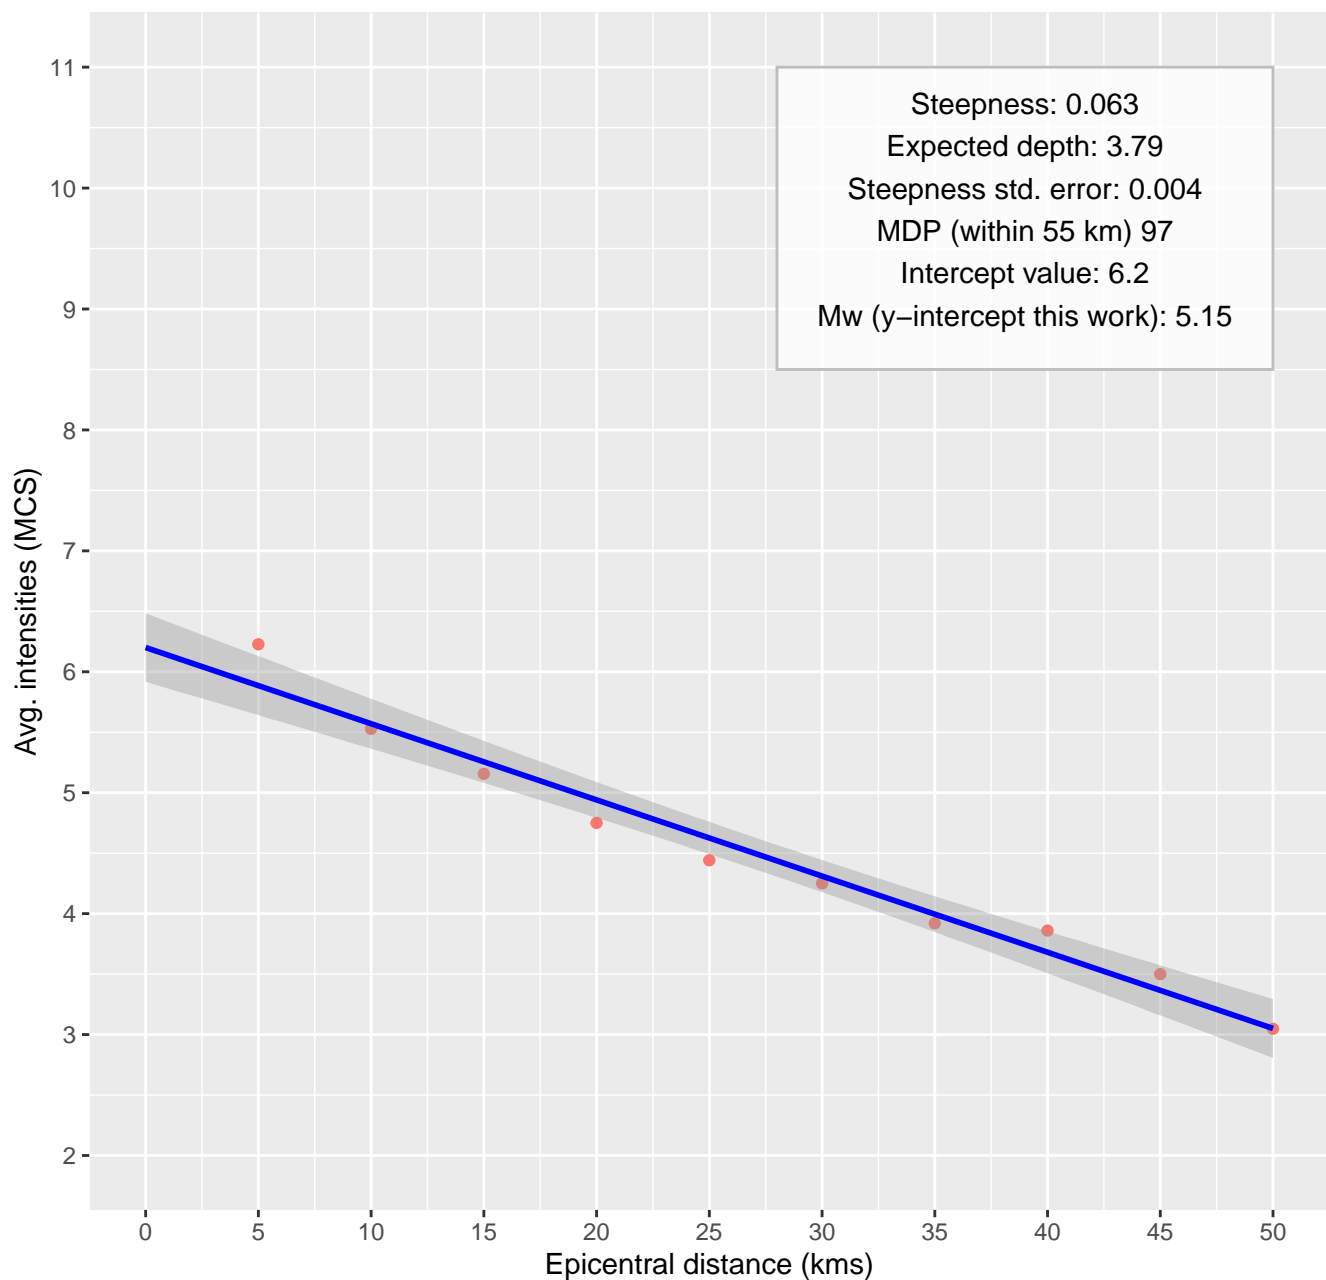

Supplement: Supplementary file 2 [file nhess-23-1007-2023-supplement.zip]

# DBMI\_ 18320308\_1830\_000 | 1832-03-08 – Crotonese

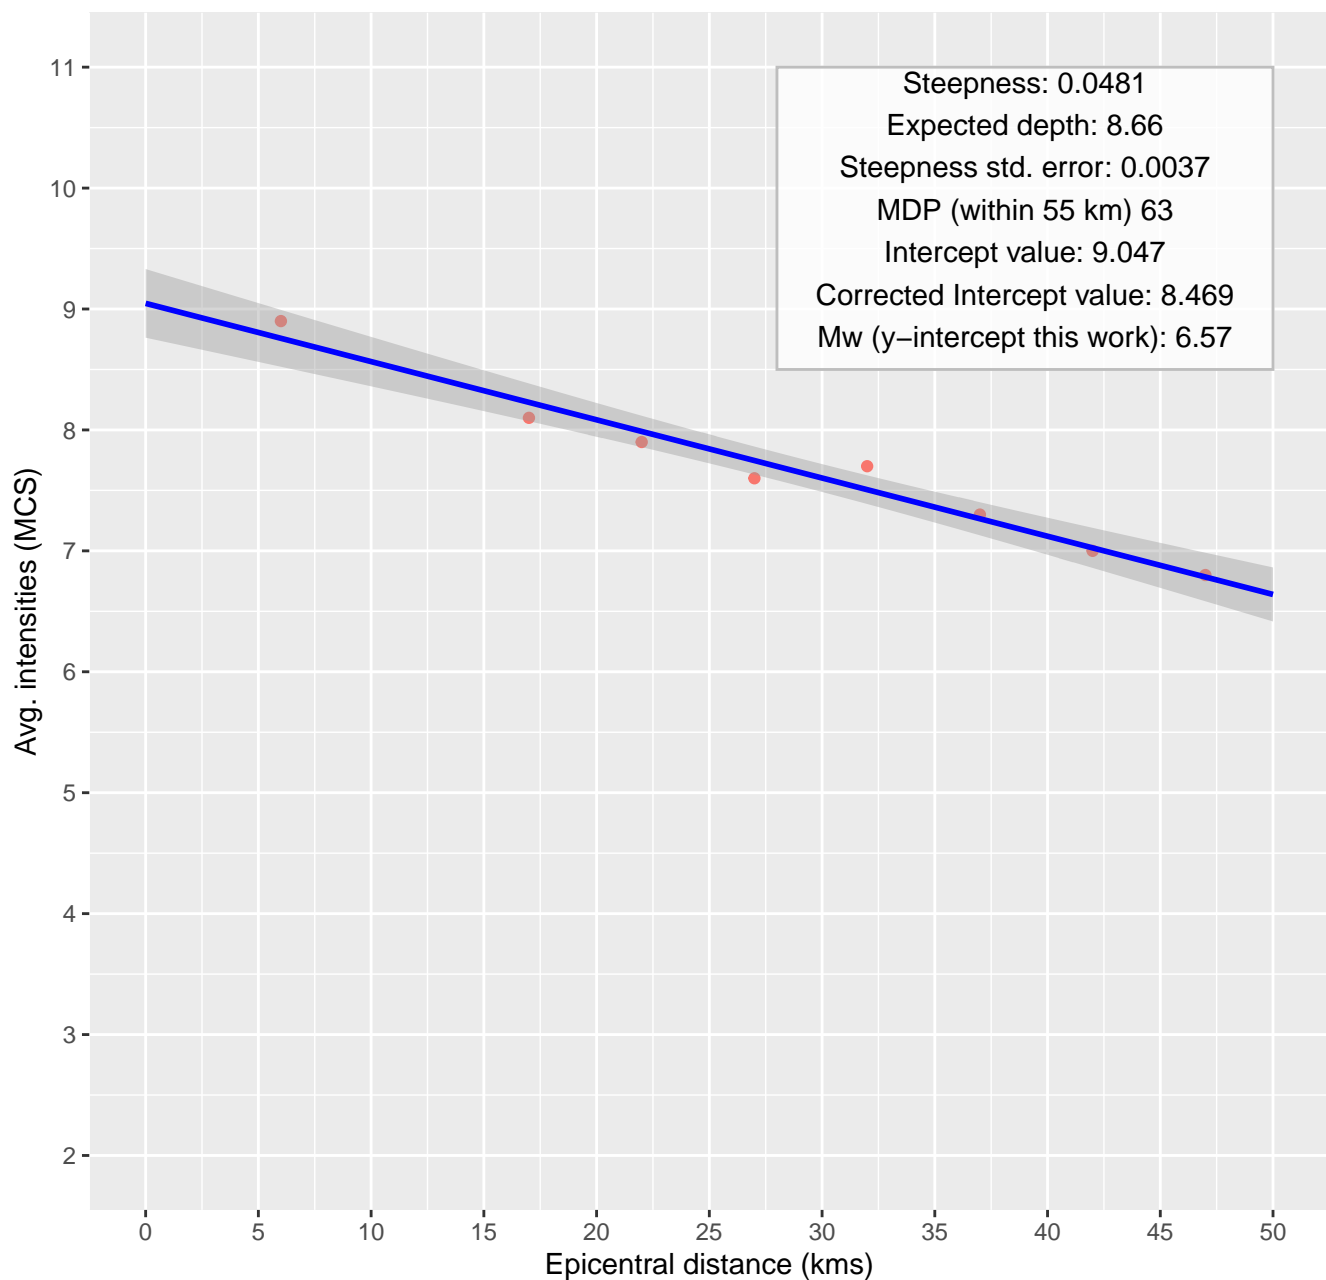

Supplement: Supplementary file 3 [file nhess-23-1007-2023-supplement.zip]

# DBMI\_ 19710211\_1849\_000 | 1971-02-11 – Valle del Chiascio

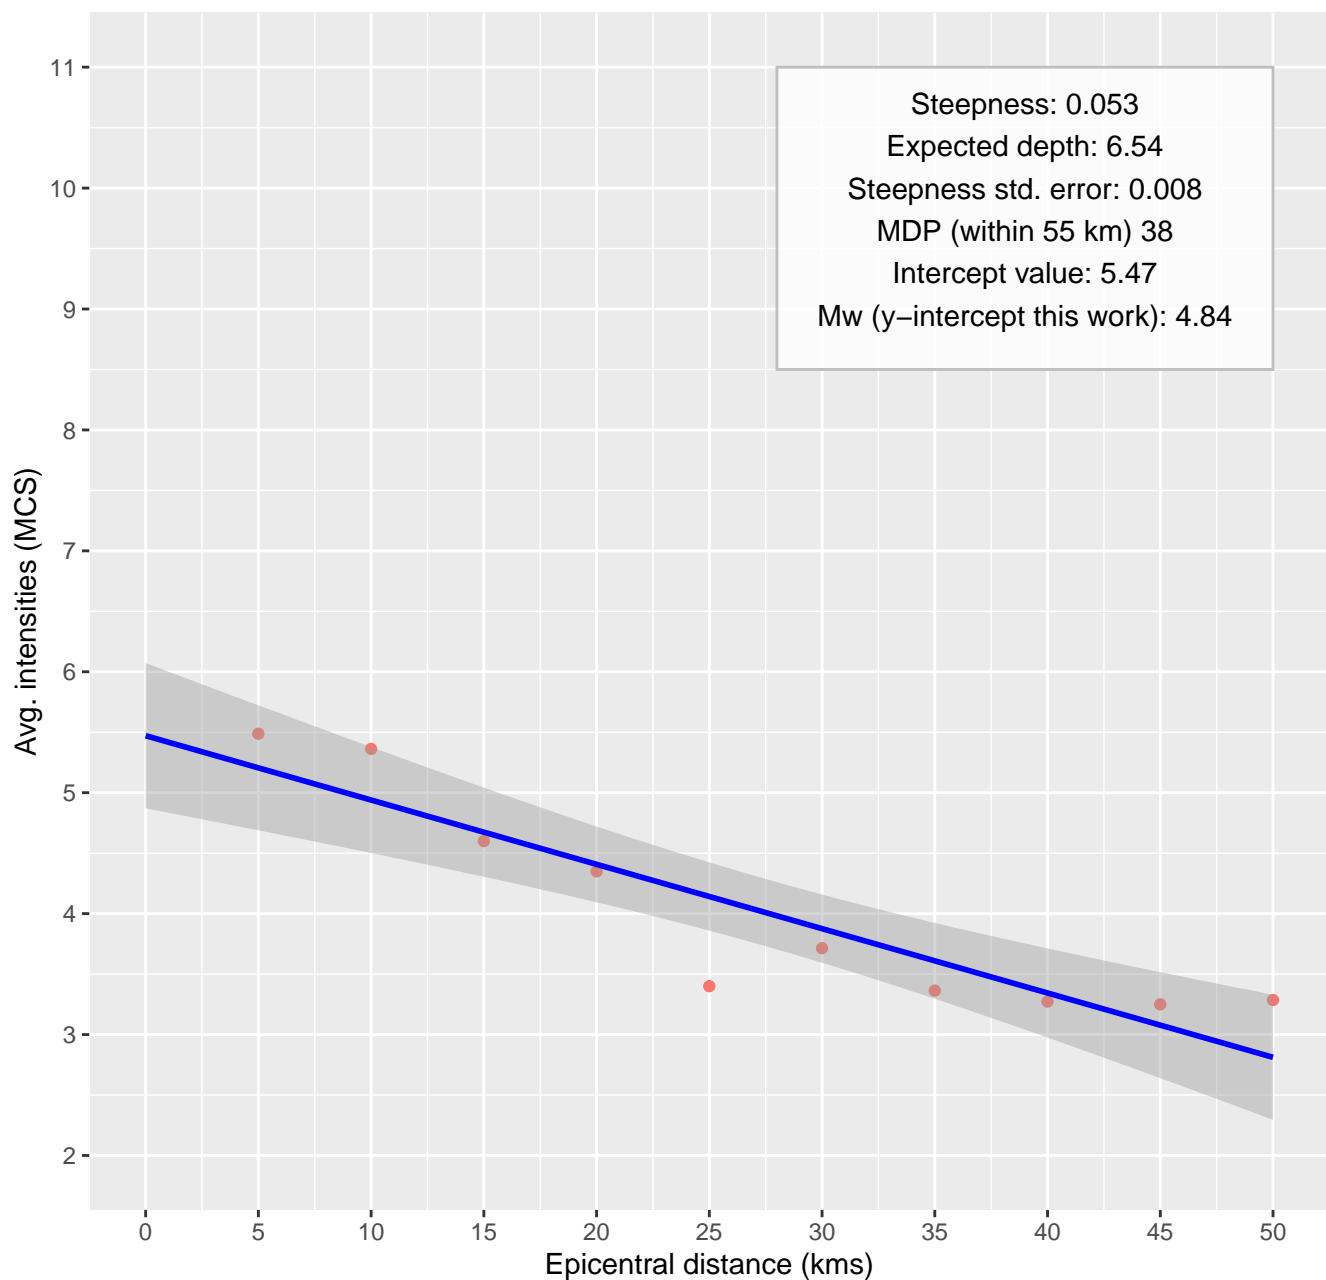

Supplement: Supplementary file 4 [file nhess-23-1007-2023-supplement.zip]

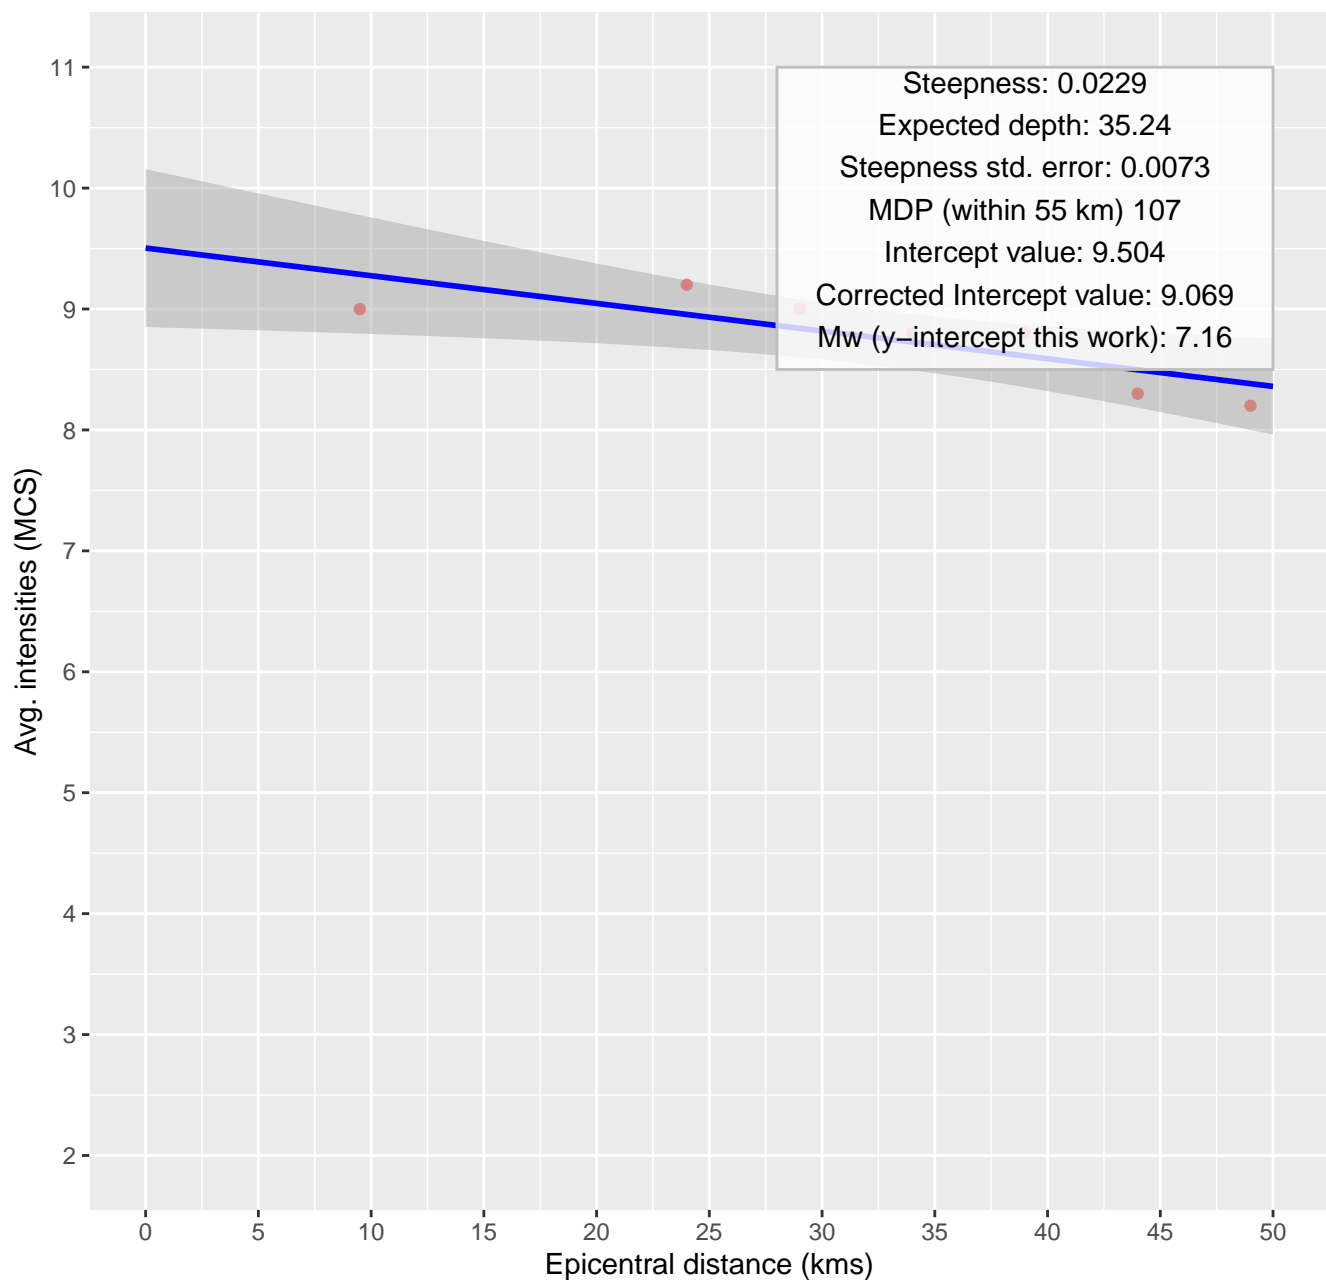

Supplement: Supplementary file 5 [file nhess-23-1007-2023-supplement.zip]

# DBMI\_ 18950518\_1955\_000 | 1895-05-18 – Fiorentino

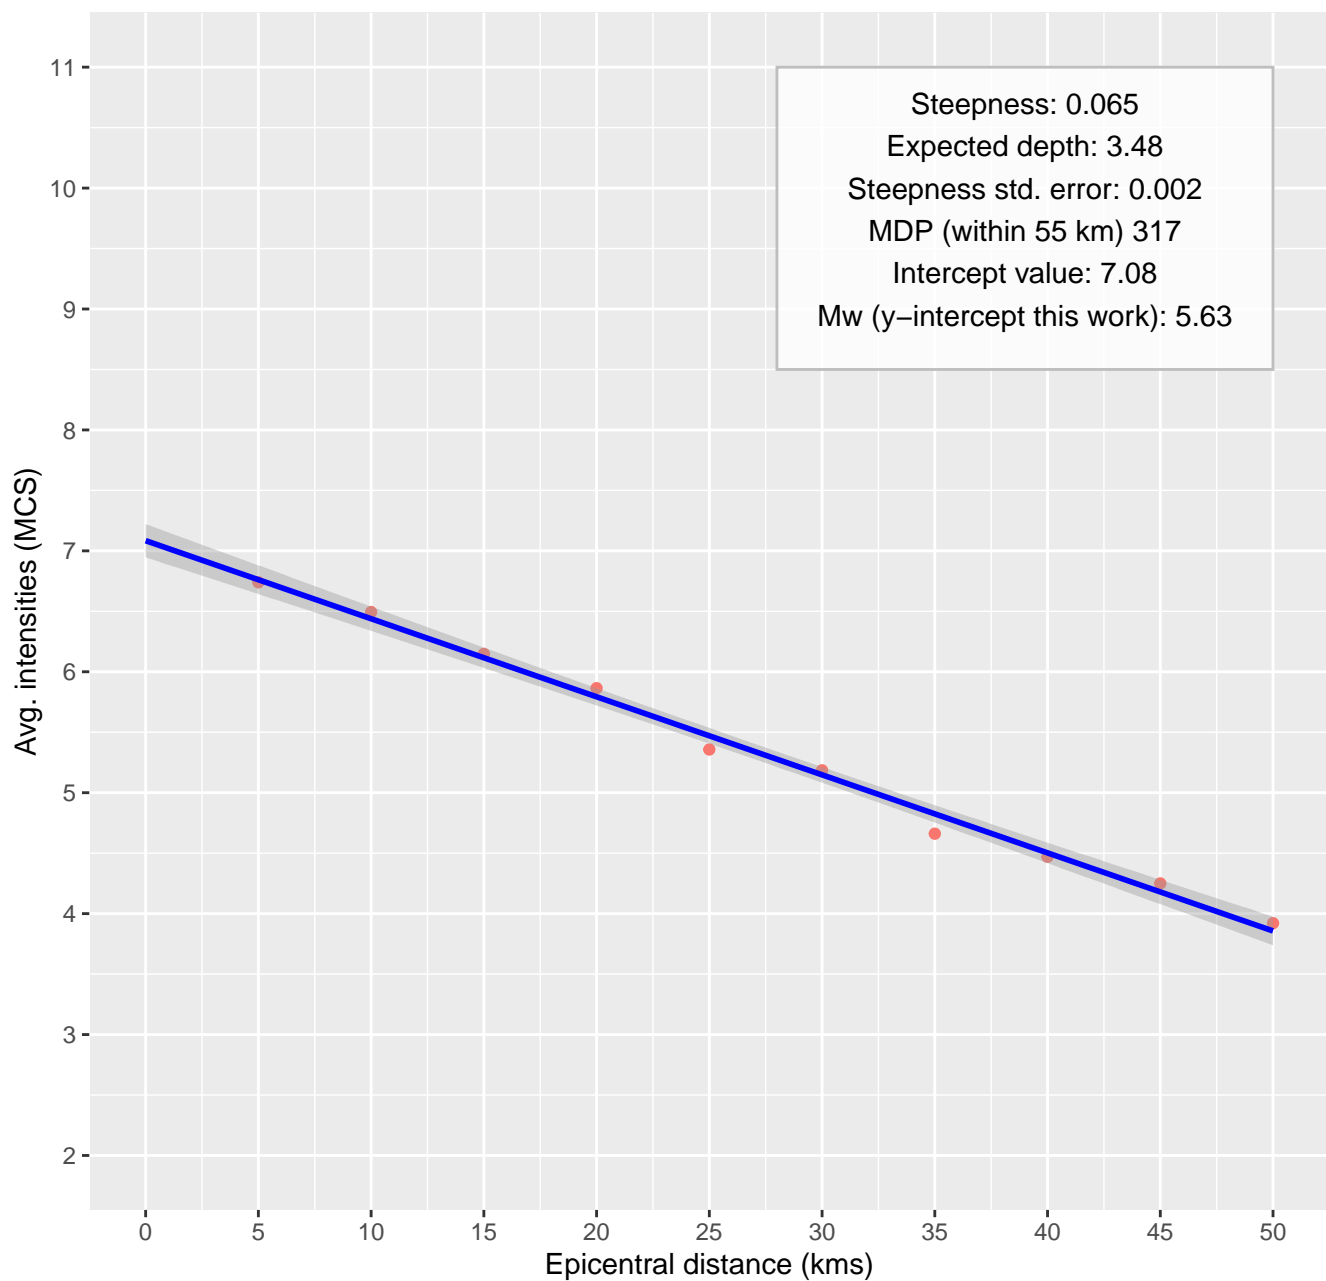

Supplement: Supplementary file 6 [file nhess-23-1007-2023-supplement.zip]

# DBMI\_ 18951101\_0000\_000 | 1895-11-01 – Campagna romana

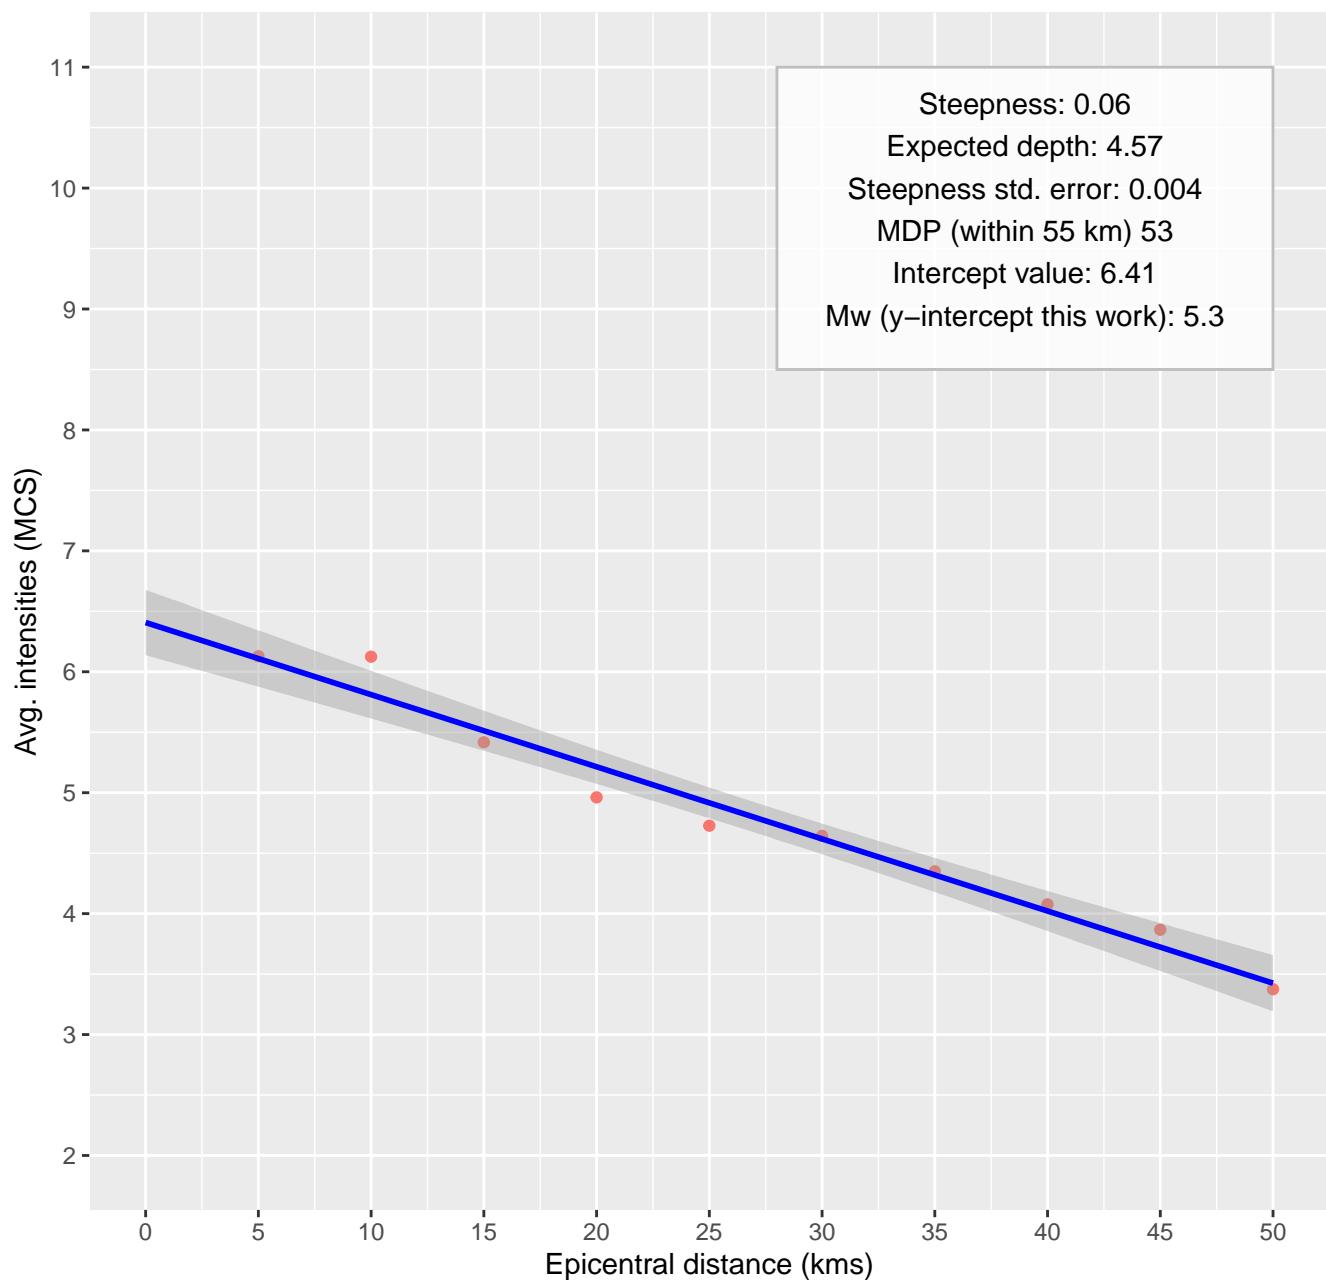

Supplement: Supplementary file 7 [file nhess-23-1007-2023-supplement.zip]

# DBMI\_ 19470511\_0632\_000 | 1947-05-11 – Calabria centrale

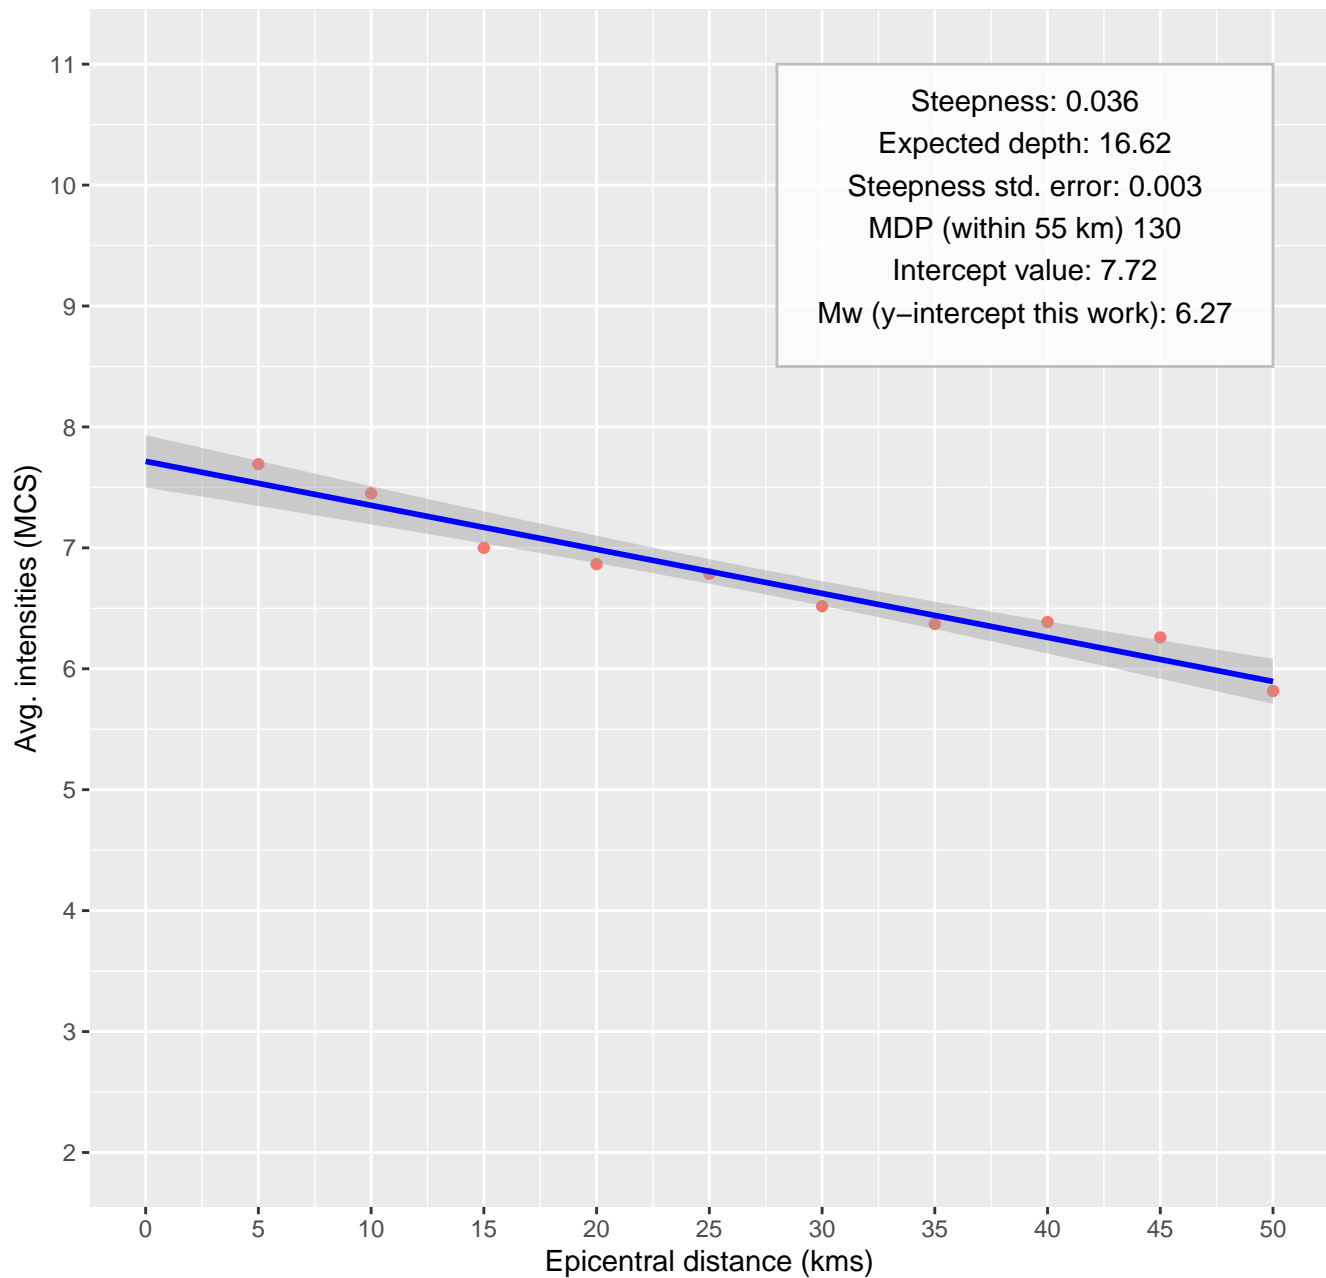

Supplement: Supplementary file 8 [file nhess-23-1007-2023-supplement.zip]

# DBMI\_ 18970706\_2044\_000 | 1897-07-06 – Mar Figure

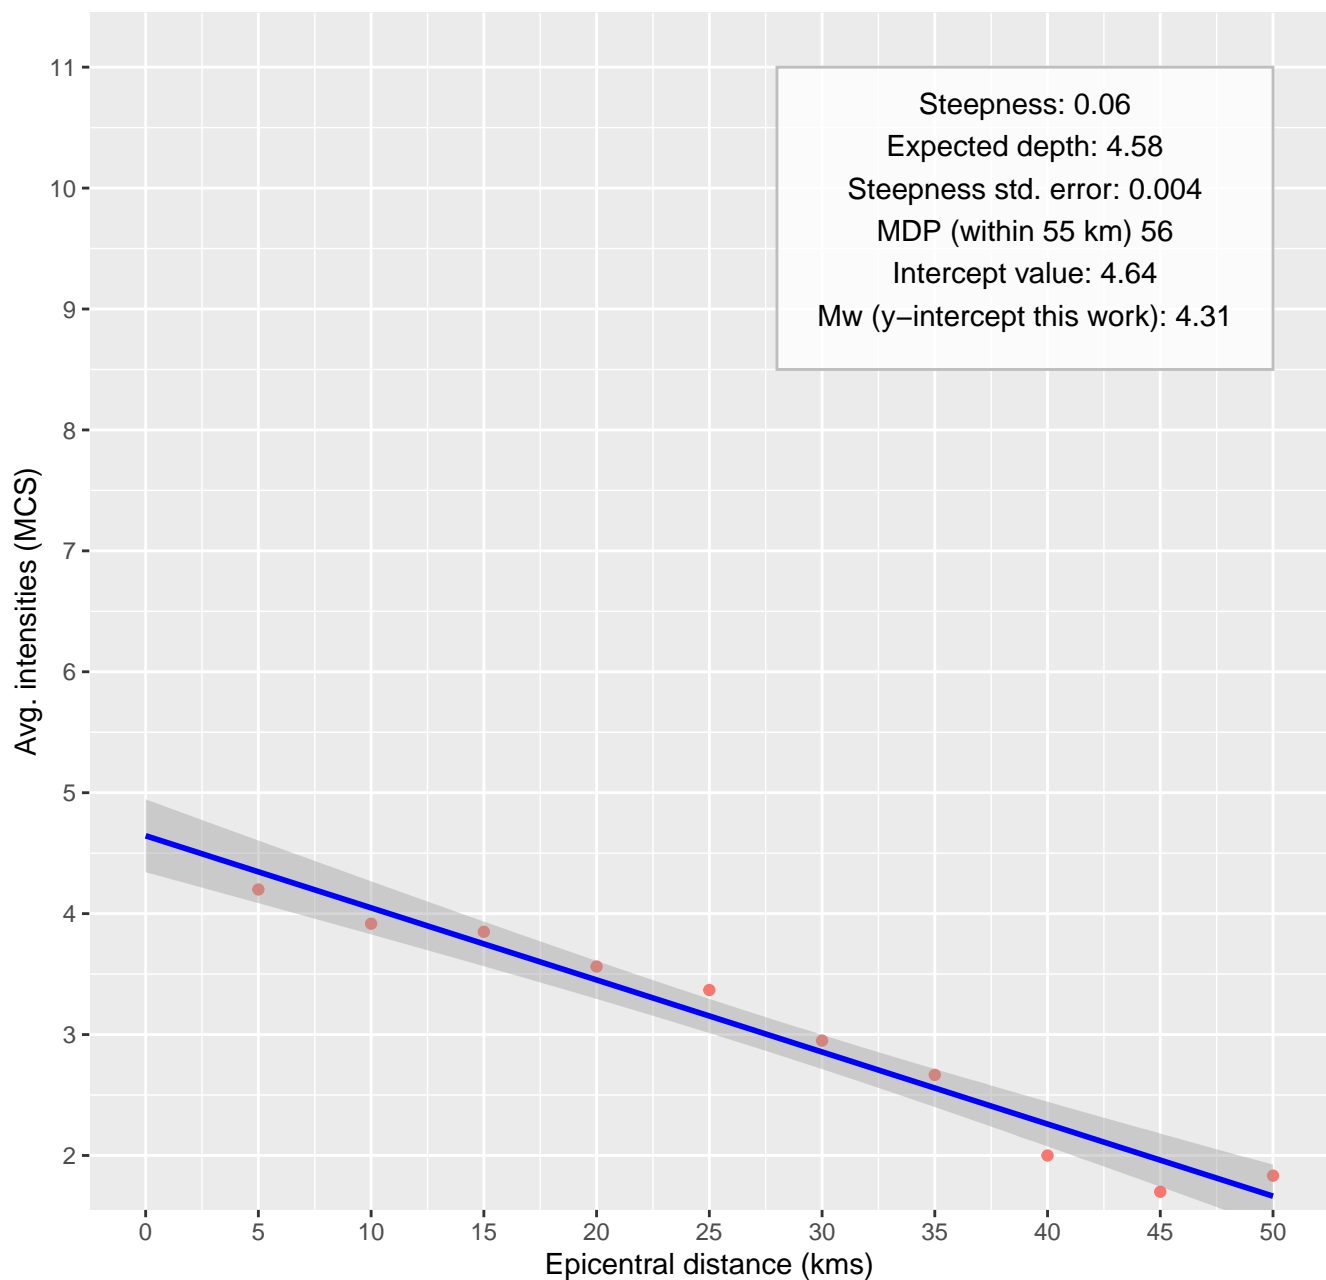

Supplement: Supplementary file 9 [file nhess-23-1007-2023-supplement.zip]

# DBMI\_ 18180220\_1815\_000 | 1818-02-20 – Catanese

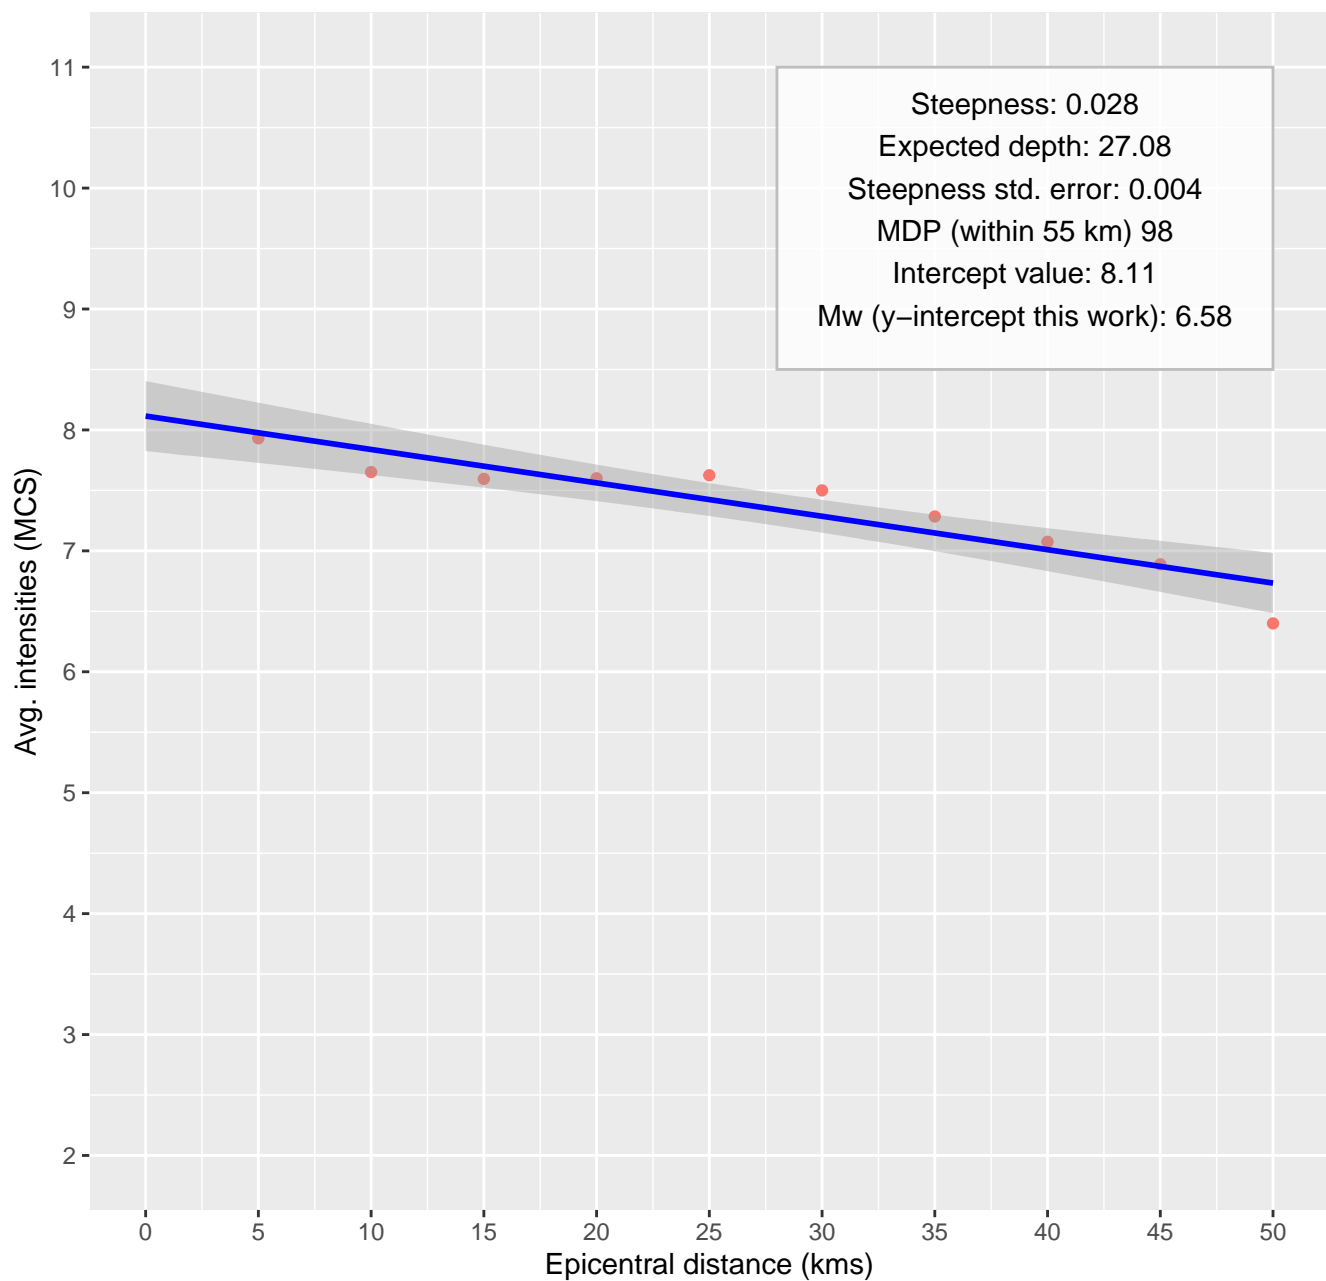

Supplement: Supplementary file 10 [file nhess-23-1007-2023-supplement.zip]

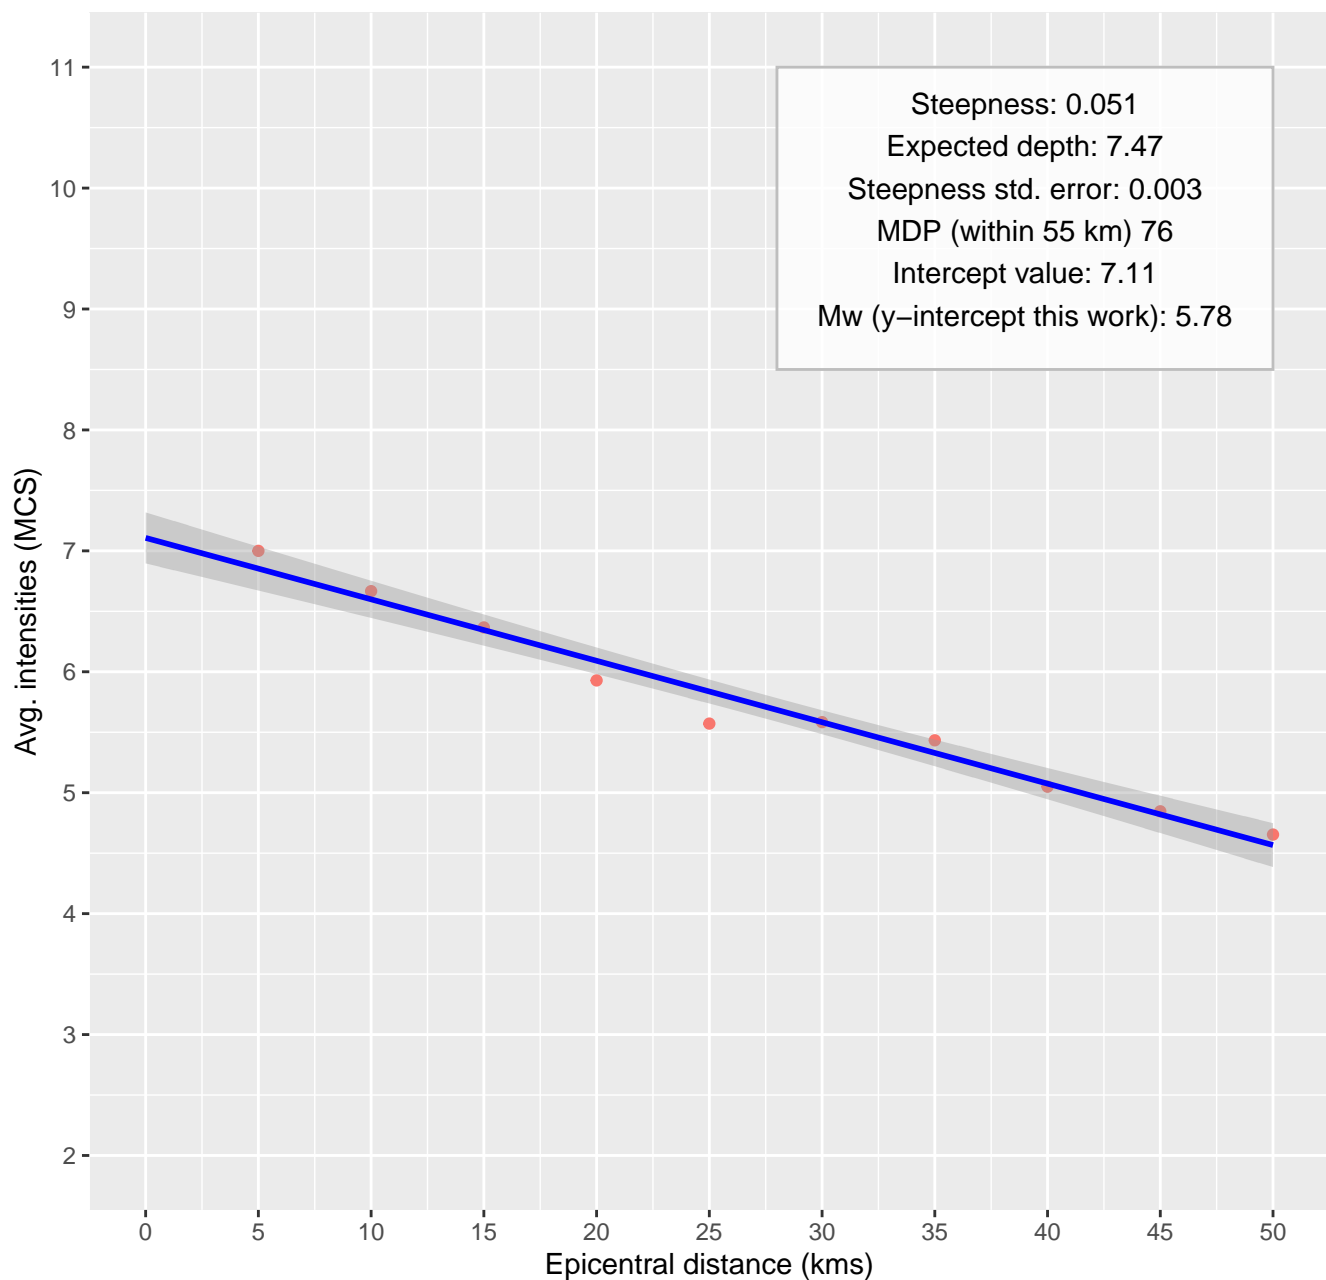

Supplement: Supplementary file 11 [file nhess-23-1007-2023-supplement.zip]

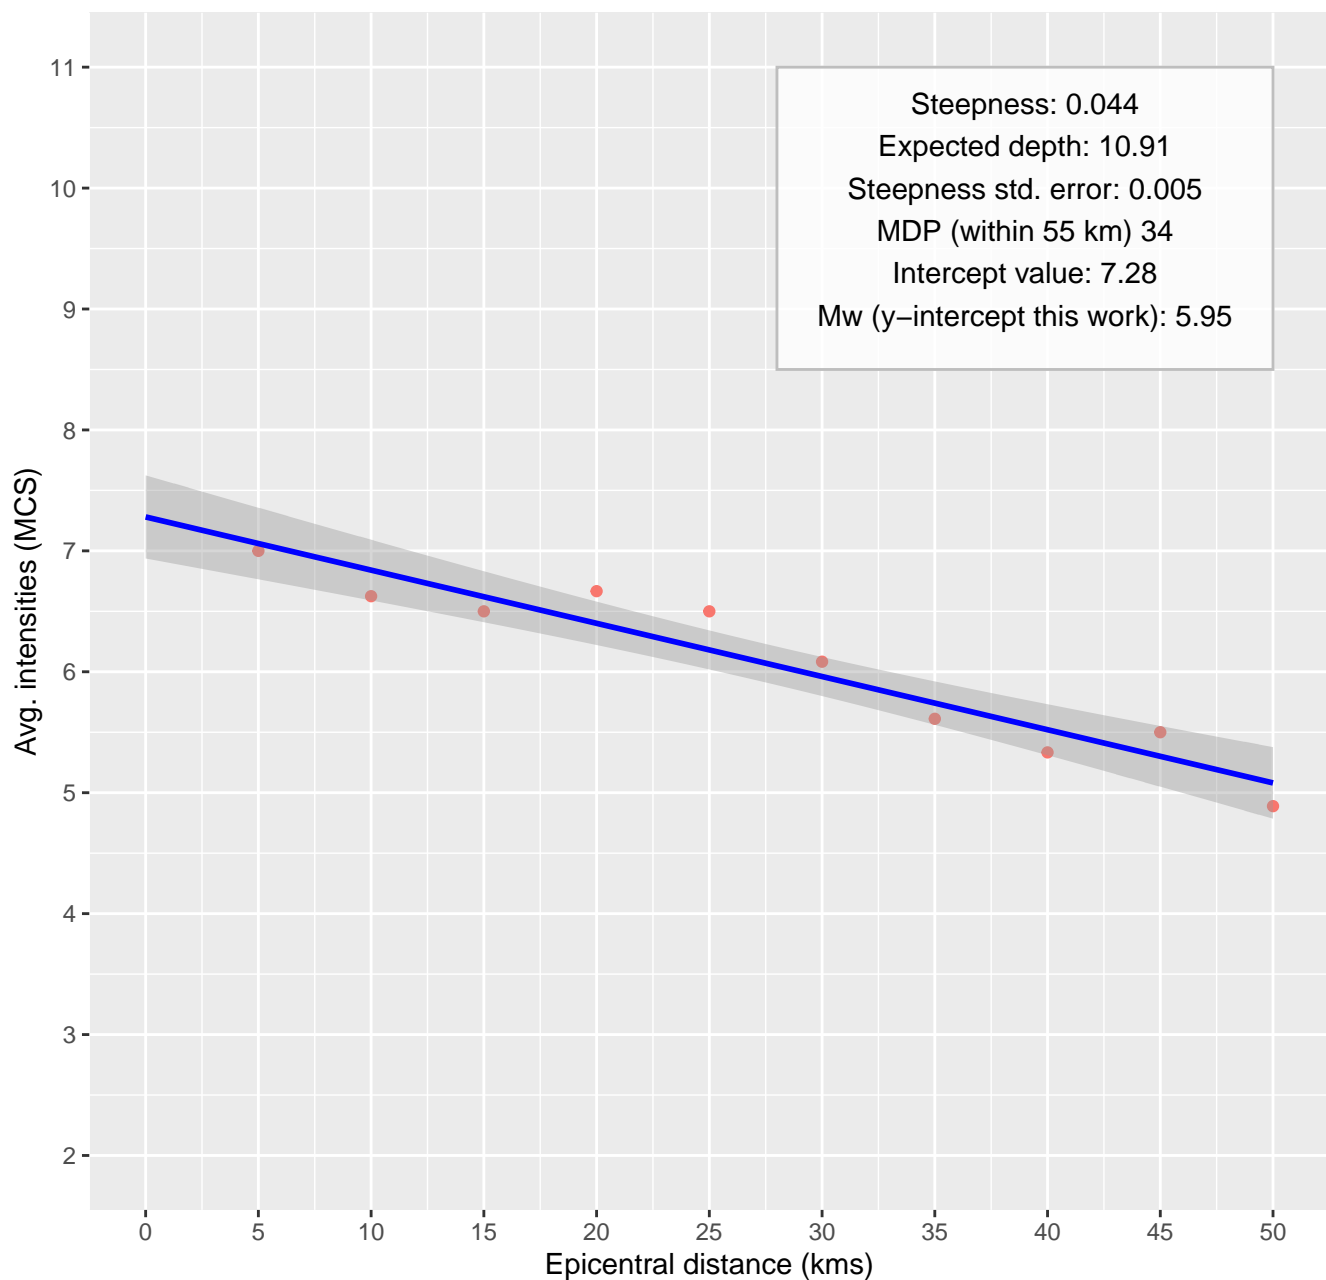

Supplement: Supplementary file 12 [file nhess-23-1007-2023-supplement.zip]

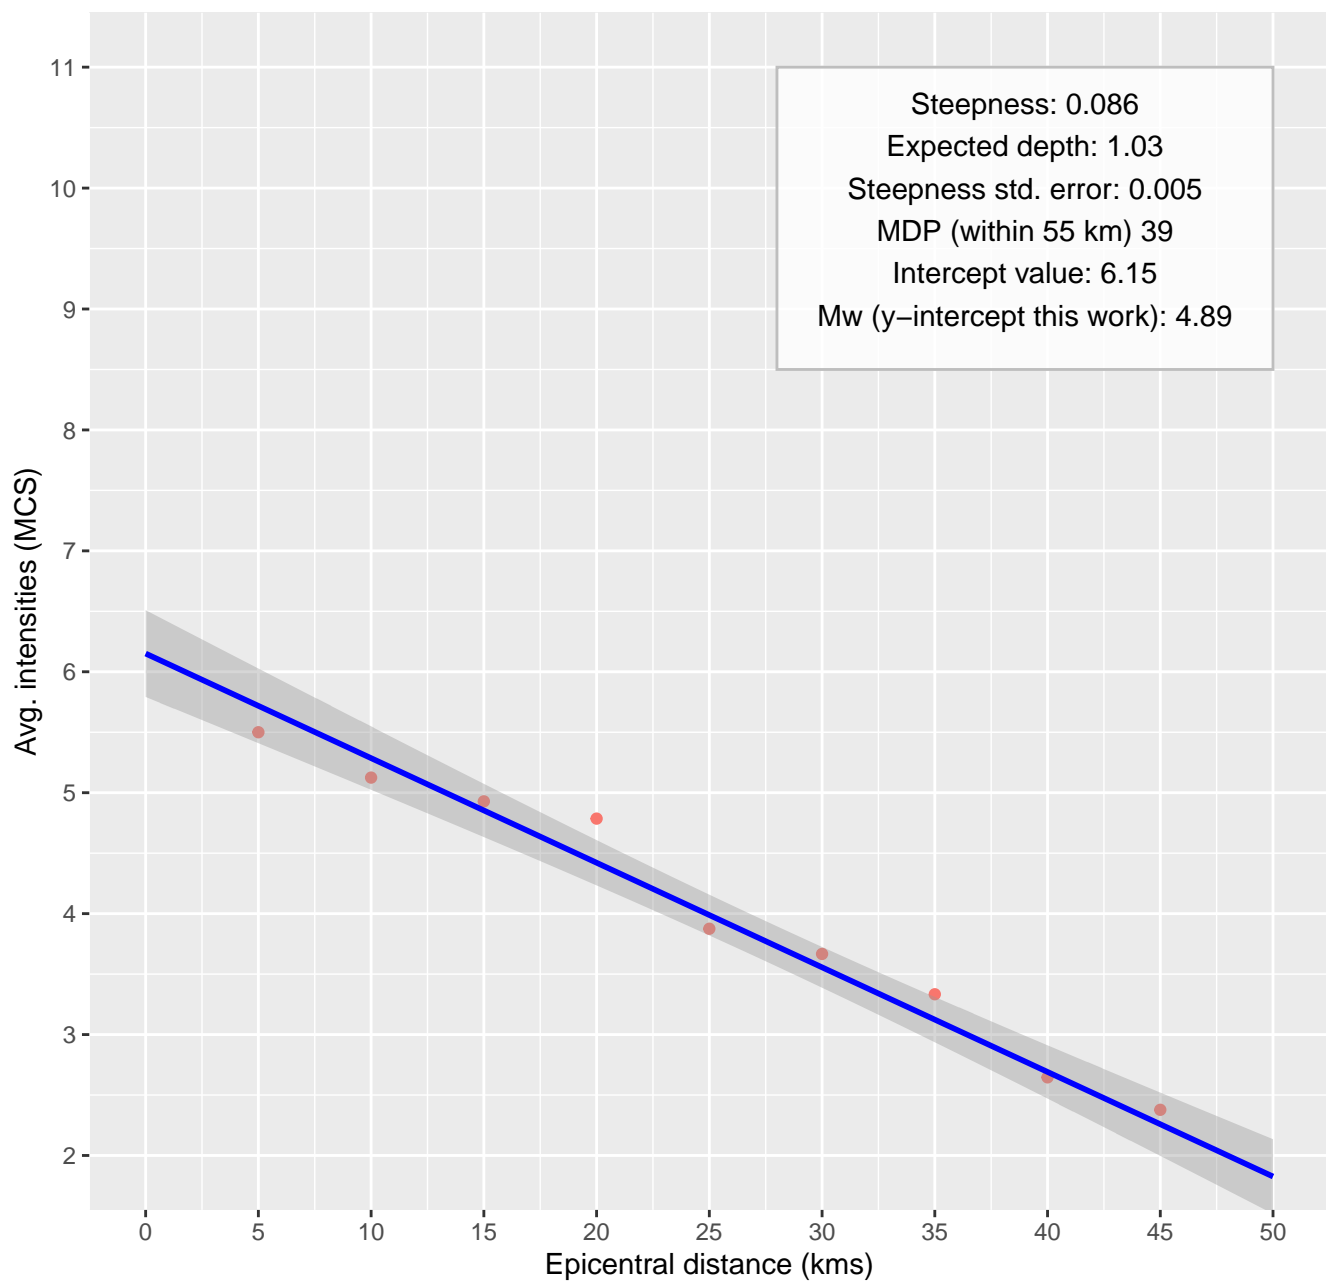

Supplement: Supplementary file 13 [file nhess-23-1007-2023-supplement.zip]

# DBMI\_ 18951025\_0024\_000 | 1895-10-25 – Chianti

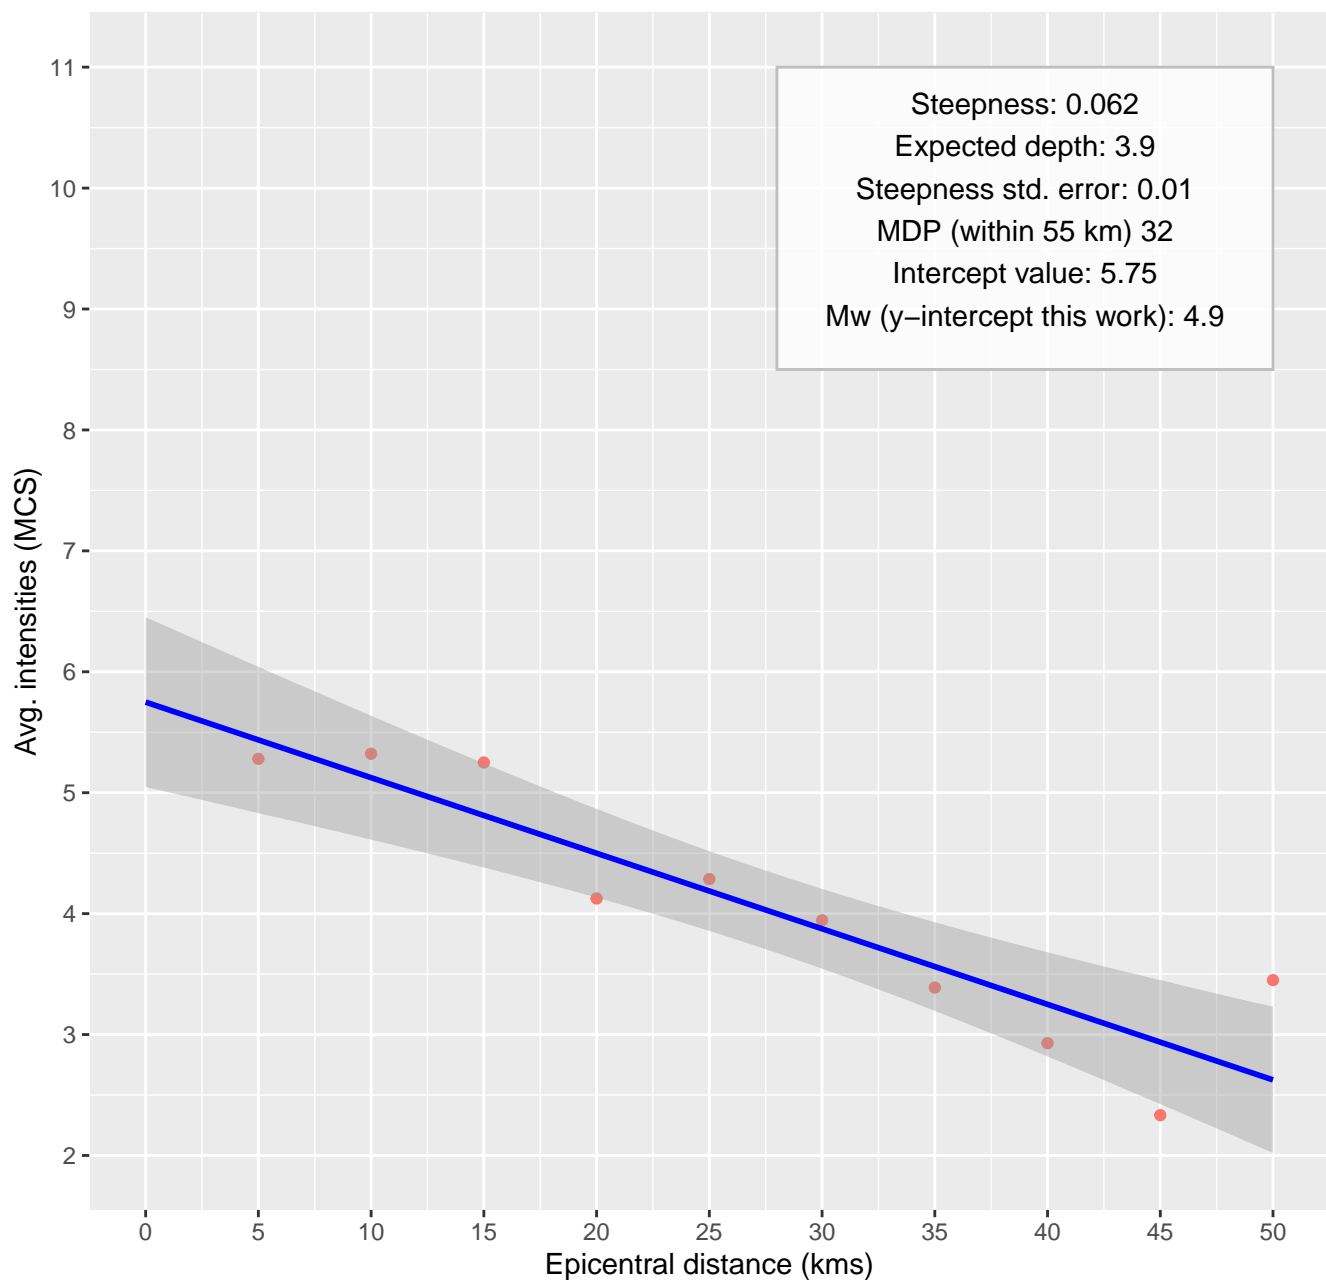

Supplement: Supplementary file 14 [file nhess-23-1007-2023-supplement.zip]

# DBMI\_ 19550723\_0354\_000 | 1955-07-23 – Prealpi Friulane

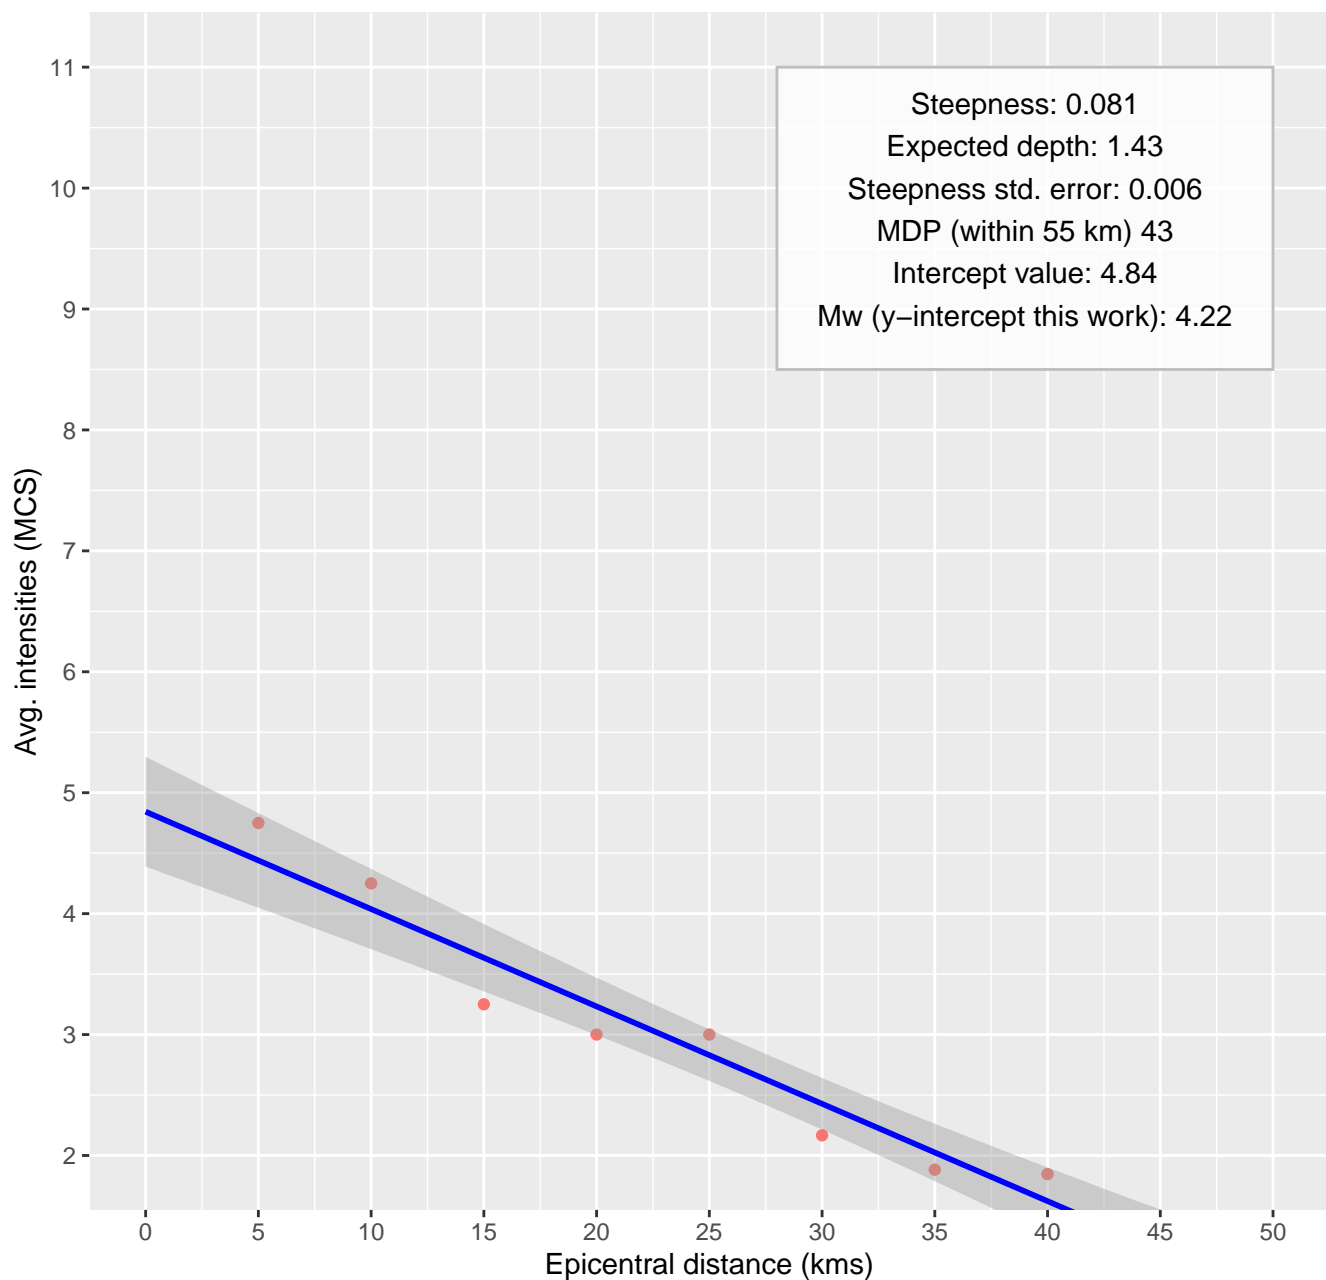

Supplement: Supplementary file 15 [file nhess-23-1007-2023-supplement.zip]

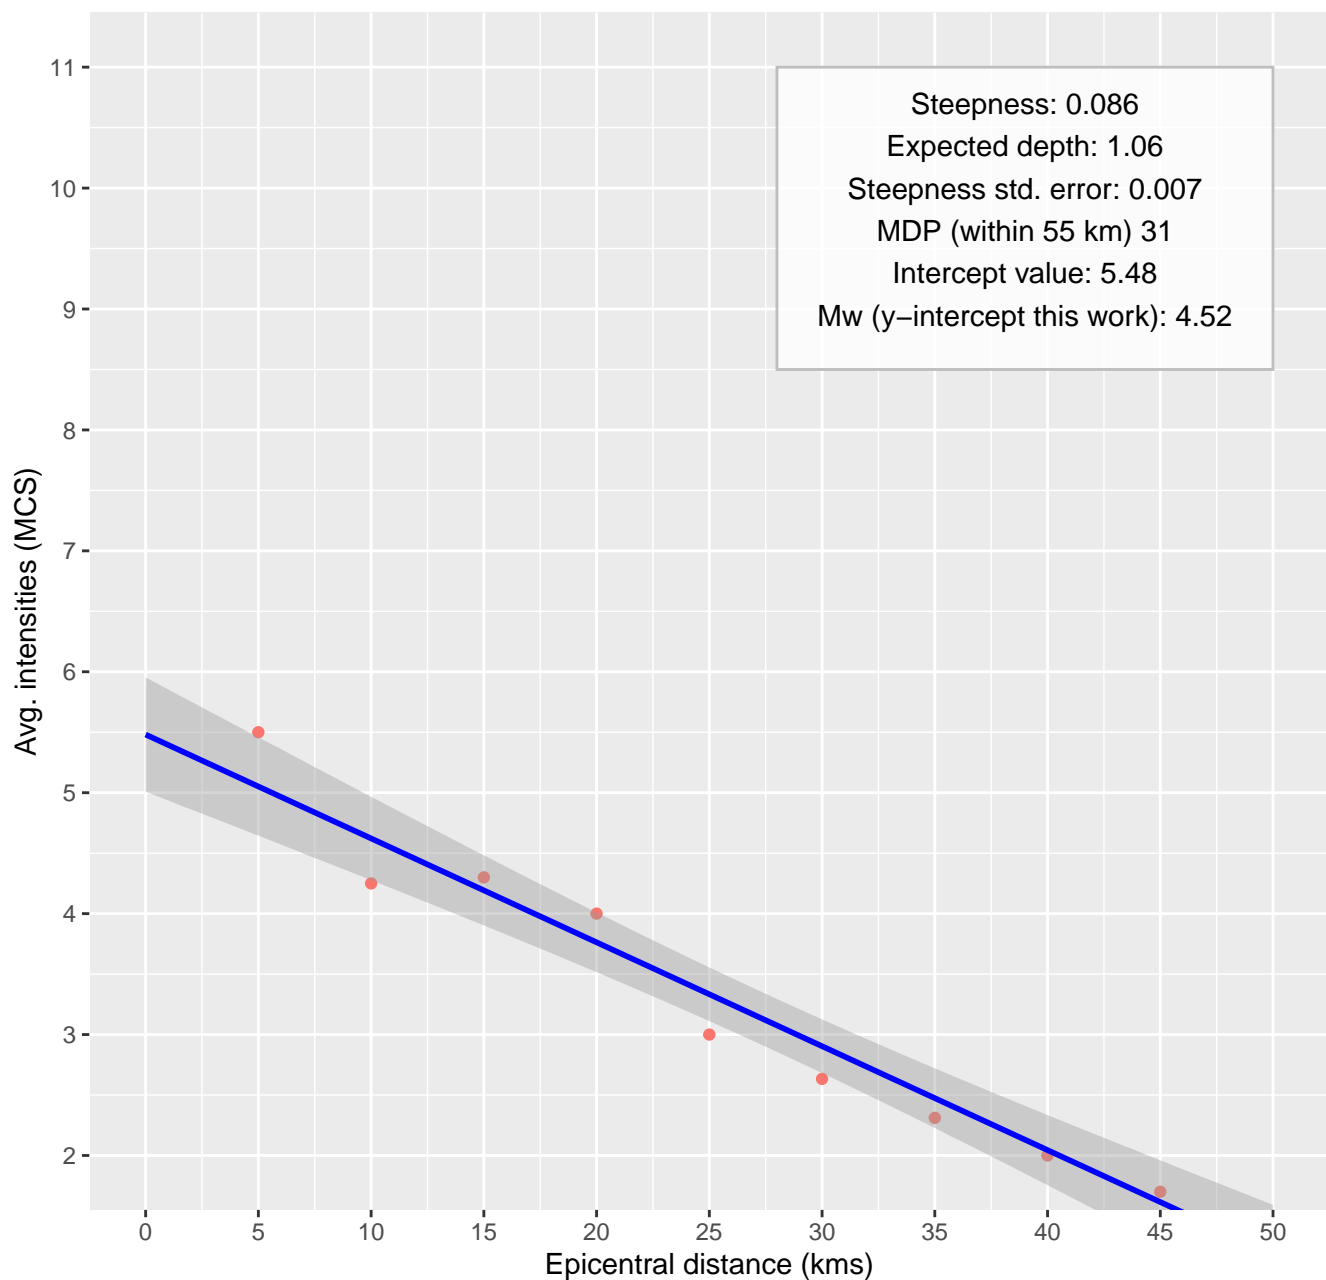

Supplement: Supplementary file 16 [file nhess-23-1007-2023-supplement.zip]

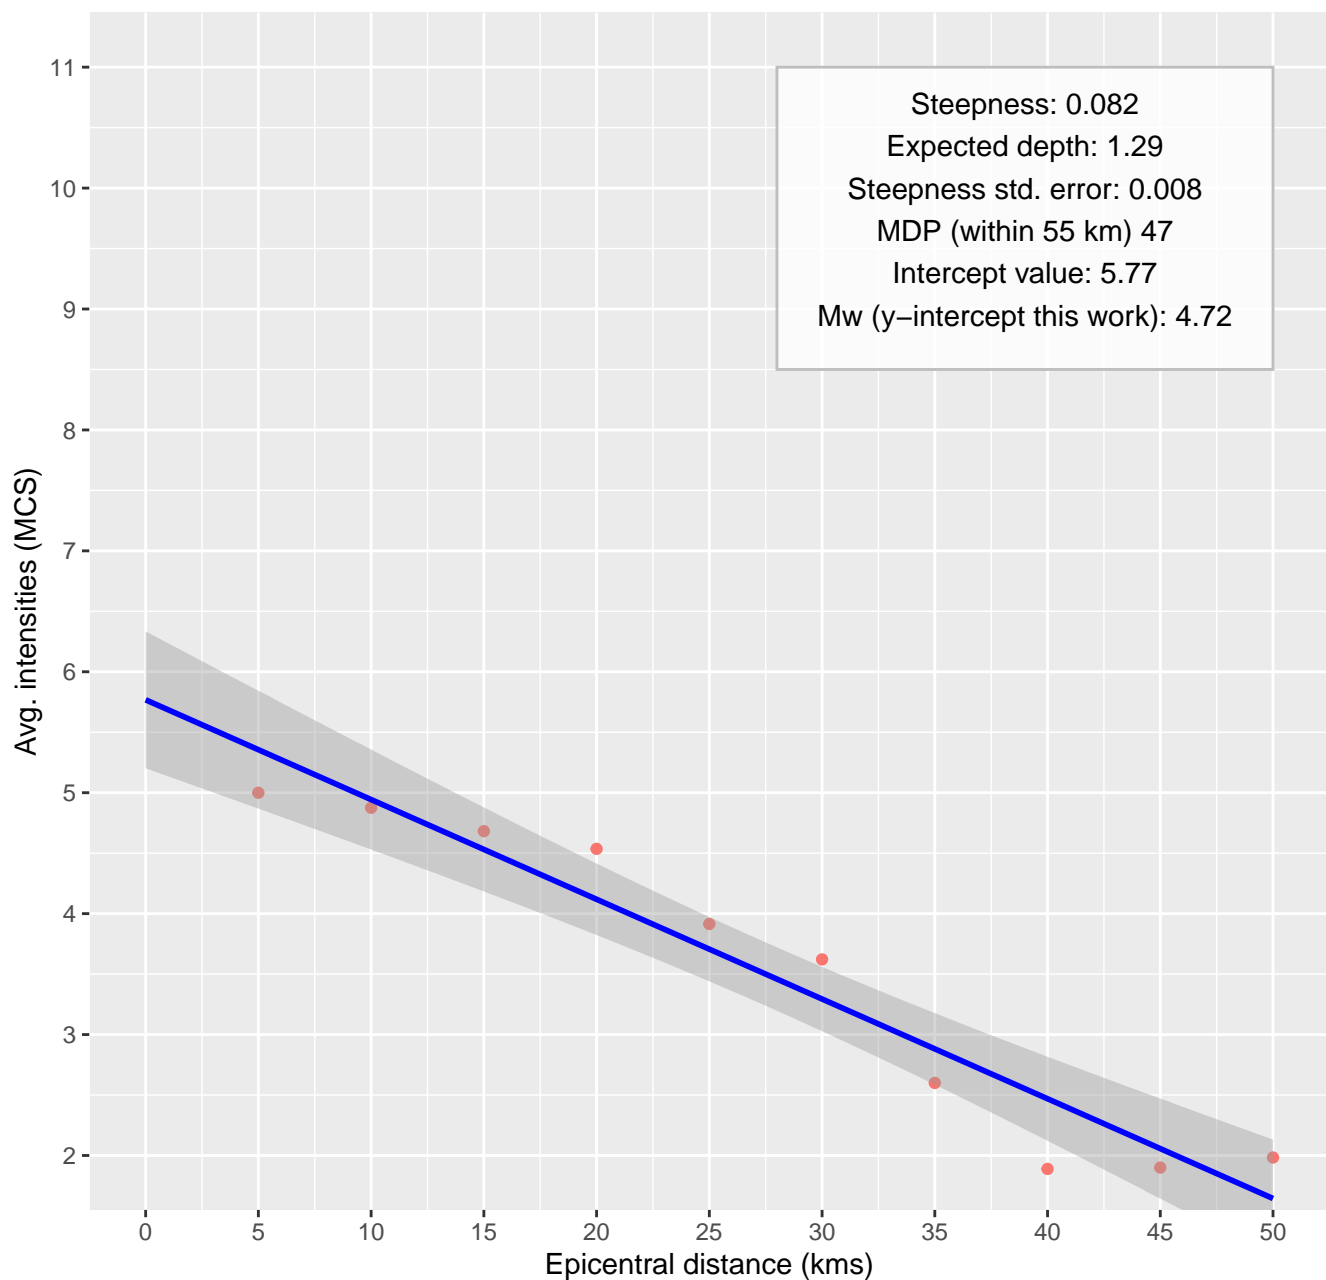

Supplement: Supplementary file 17 [file nhess-23-1007-2023-supplement.zip]

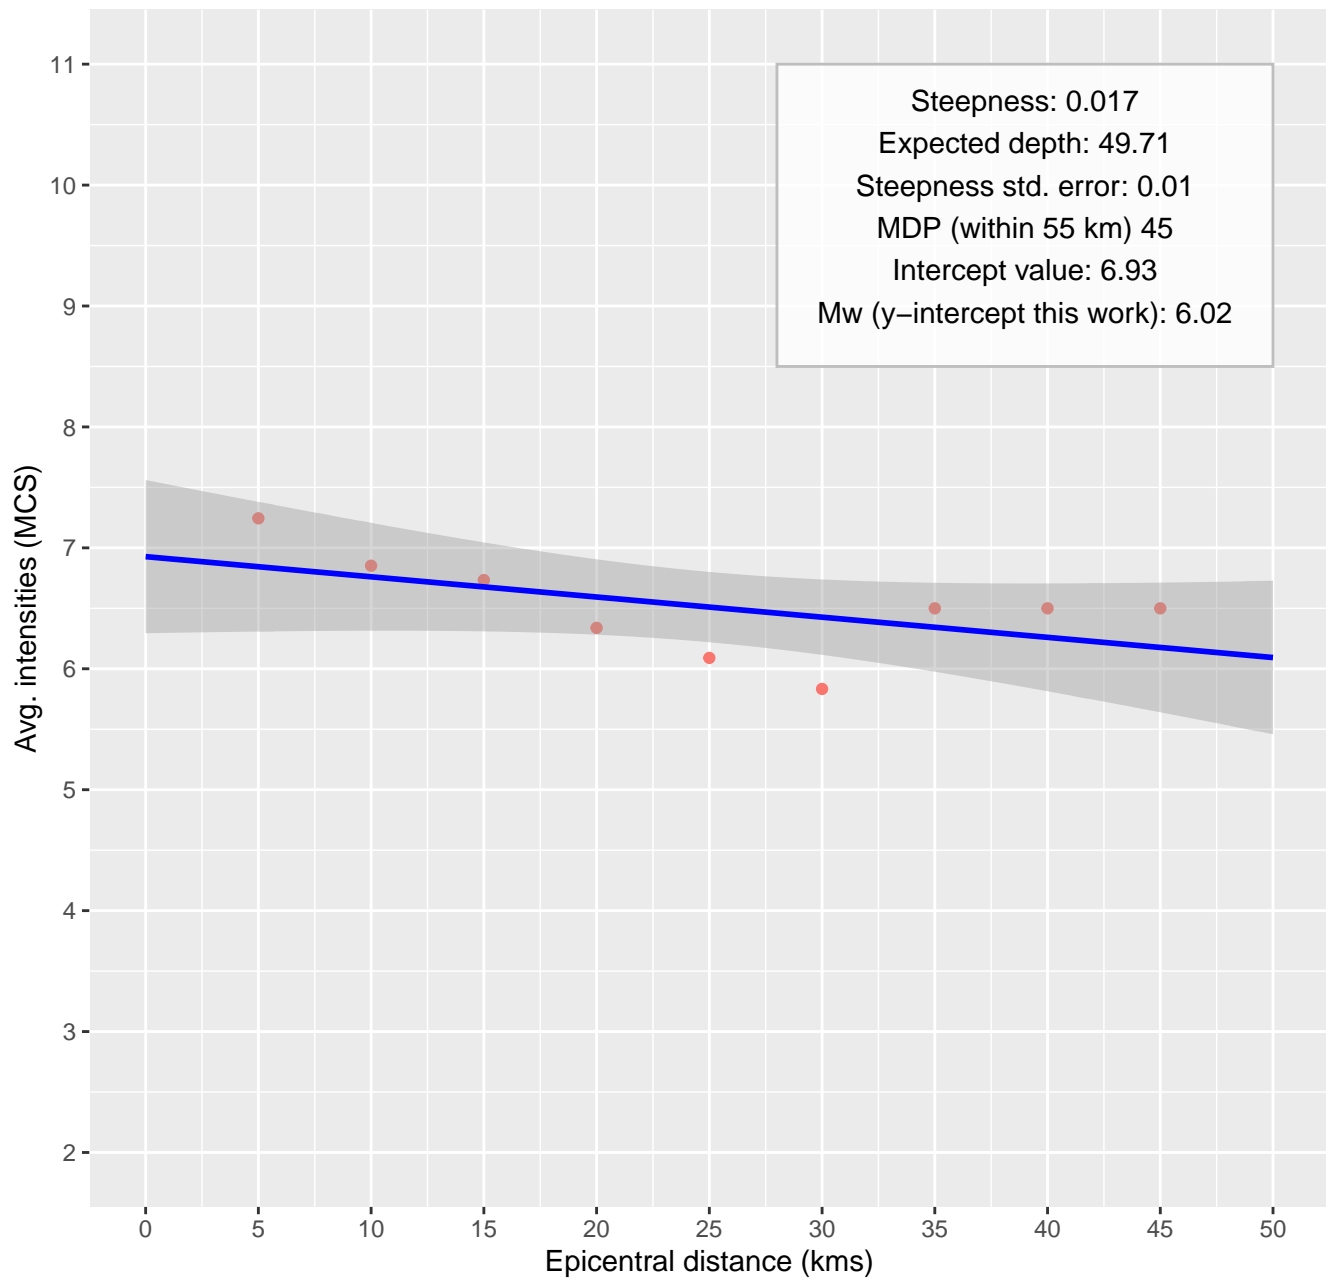

Supplement: Supplementary file 18 [file nhess-23-1007-2023-supplement.zip]

# DBMI\_ 19750116\_0009\_000 | 1975-01-16 – Stretto di Messina

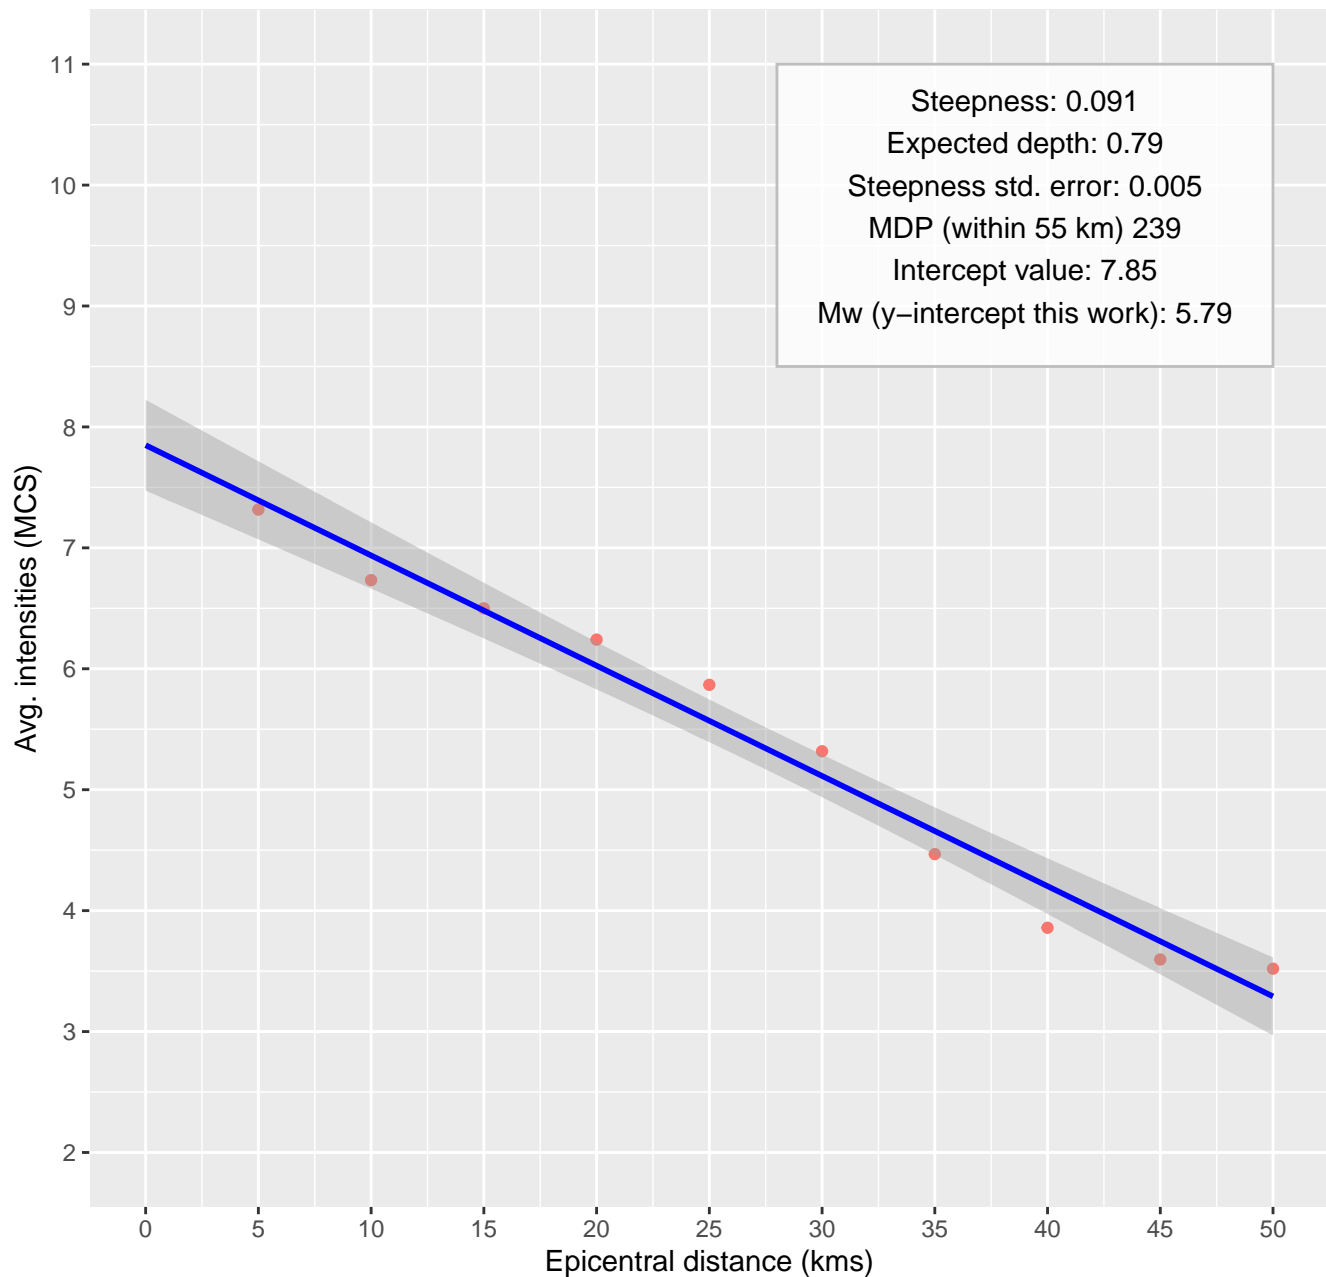

Supplement: Supplementary file 19 [file nhess-23-1007-2023-supplement.zip]

# DBMI\_ 19830202\_0814\_000 | 1983-02-02 – Potentino

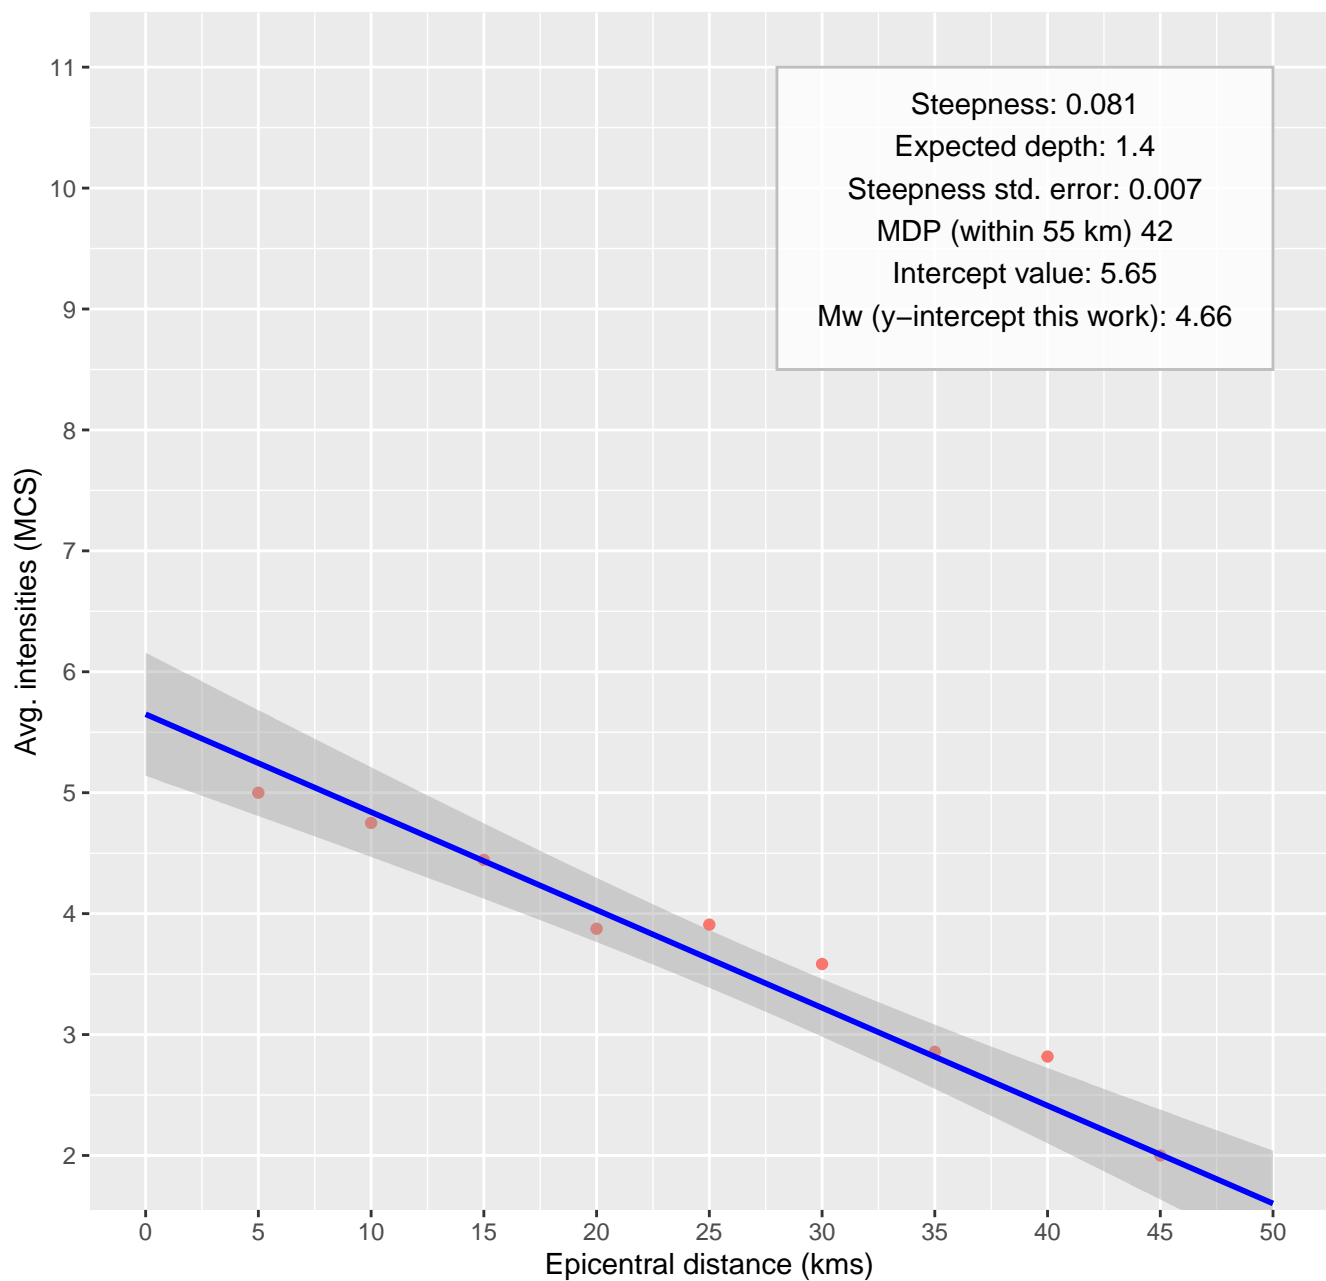

Supplement: Supplementary file 20 [file nhess-23-1007-2023-supplement.zip]

# DBMI\_ 19780311\_1920\_000 | 1978-03-11 – Aspromonte

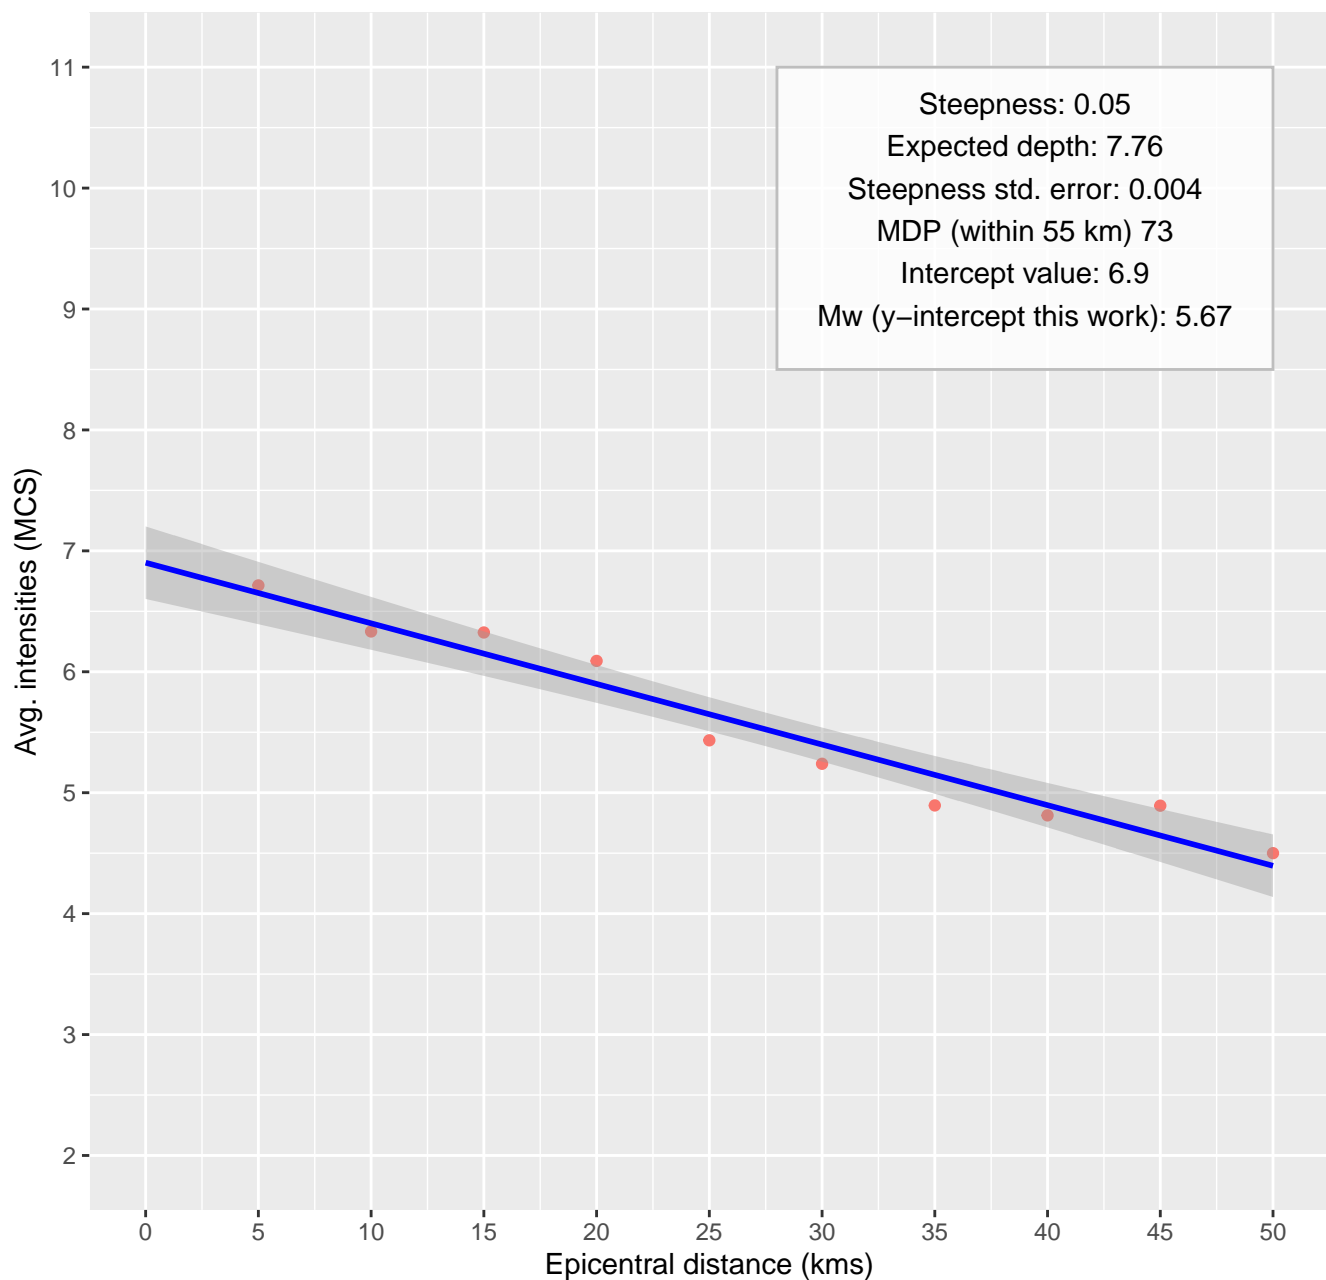

Supplement: Supplementary file 21 [file nhess-23-1007-2023-supplement.zip]

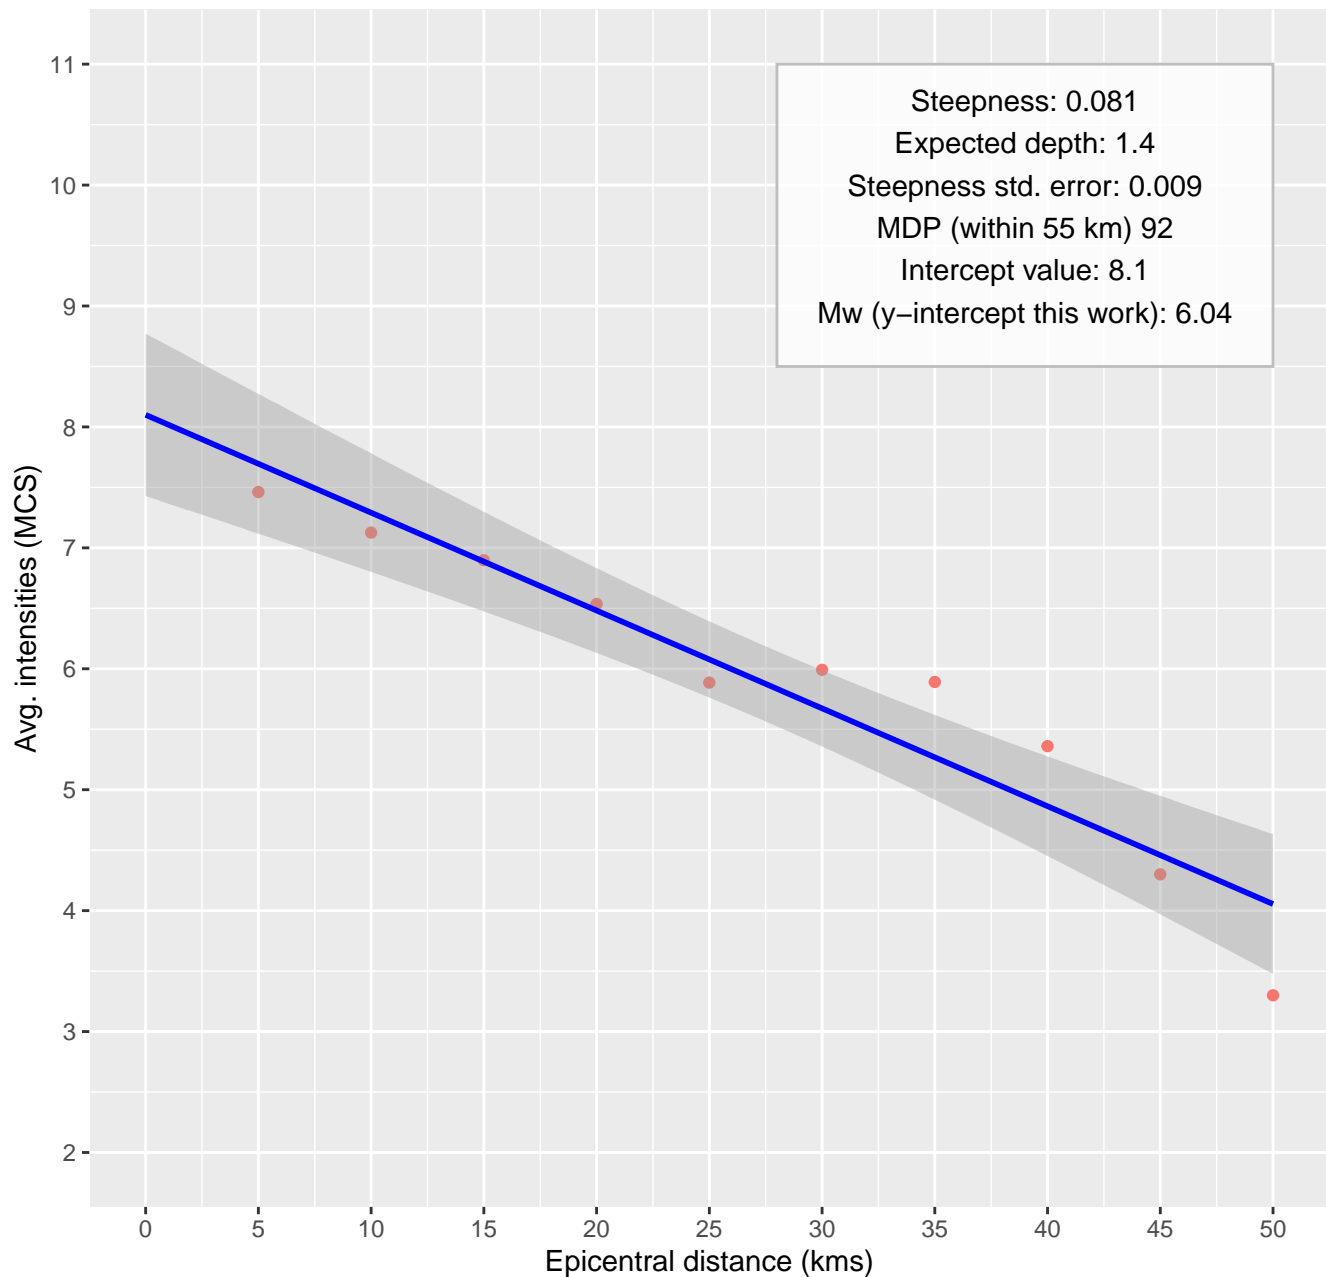

Supplement: Supplementary file 22 [file nhess-23-1007-2023-supplement.zip]

# DBMI\_ 19100123\_0150\_000 | 1910-01-23 – Piacentino

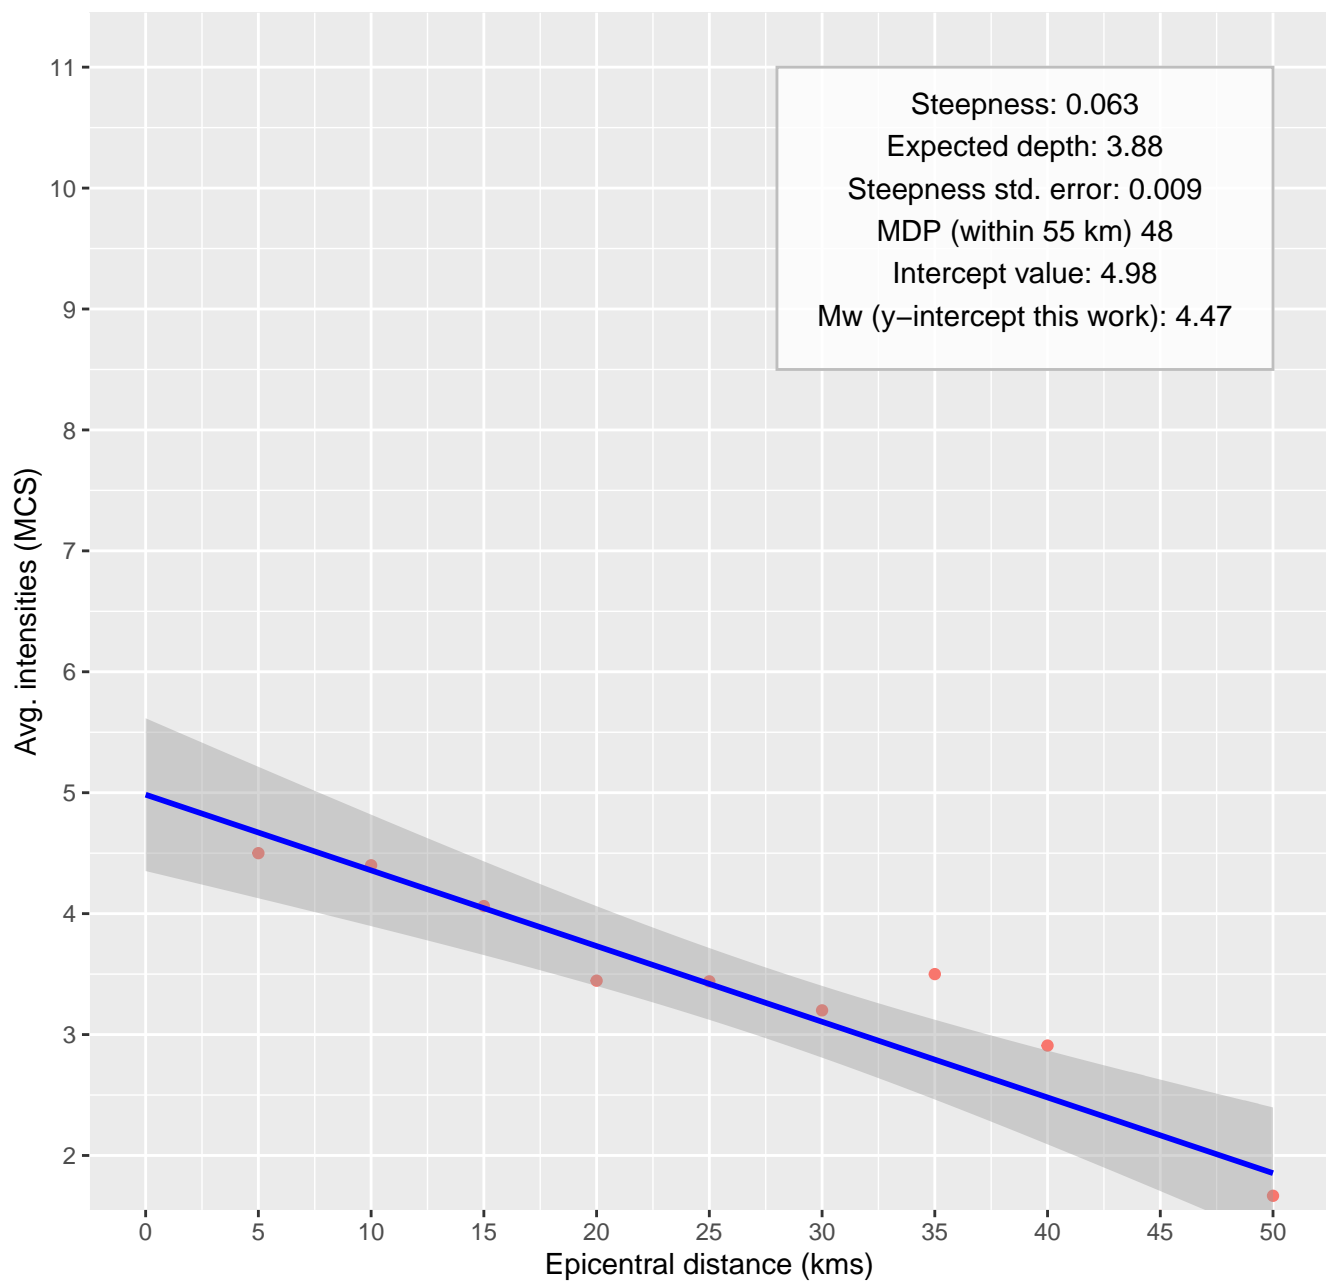

Supplement: Supplementary file 23 [file nhess-23-1007-2023-supplement.zip]

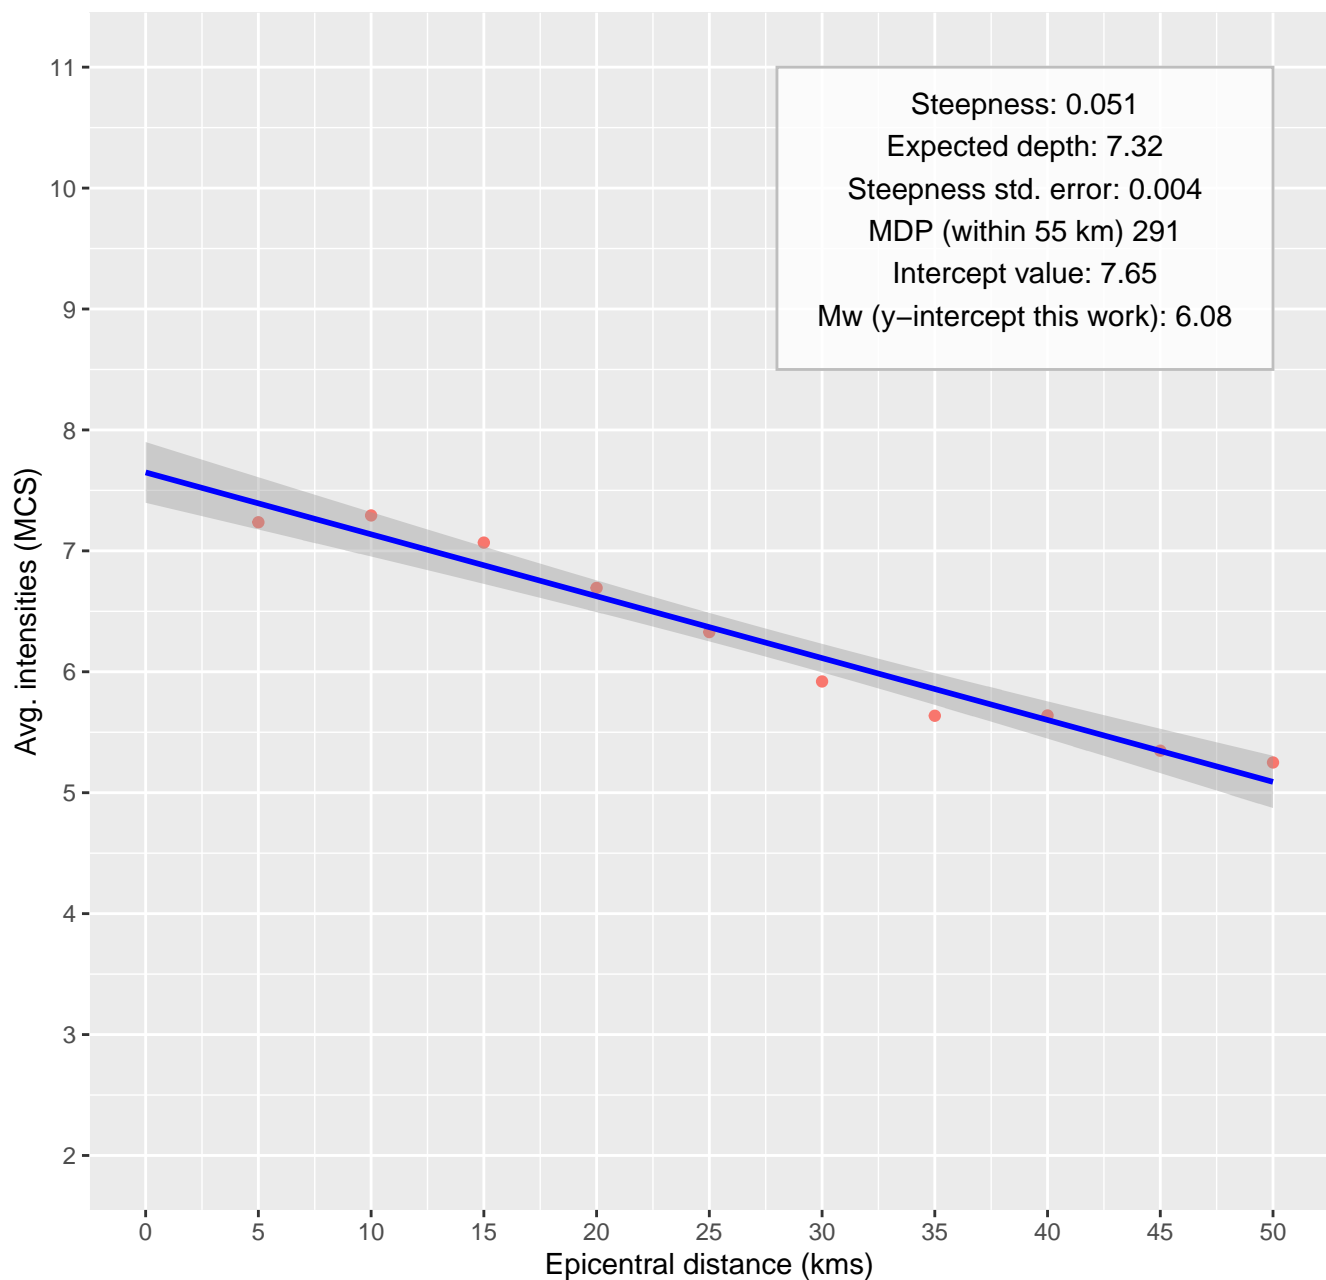

Supplement: Supplementary file 24 [file nhess-23-1007-2023-supplement.zip]

# DBMI\_ 19560601\_0832\_000 | 1956-06-01 – Alta Valle del Po

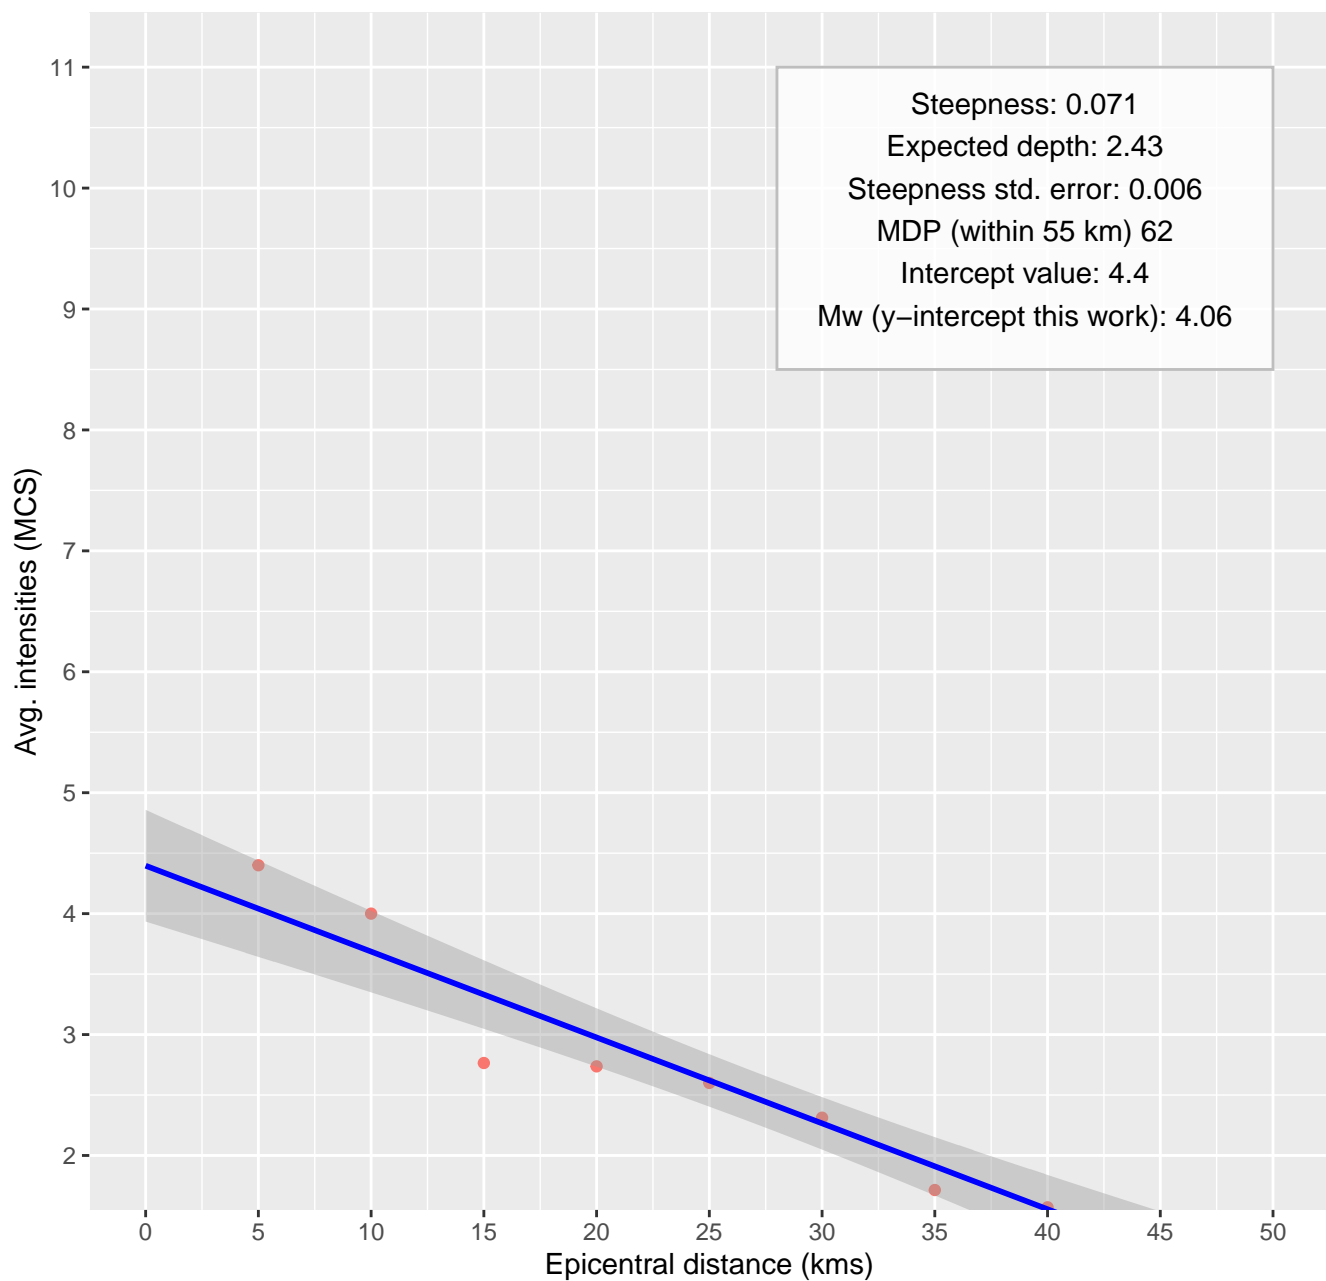

Supplement: Supplementary file 25 [file nhess-23-1007-2023-supplement.zip]

# DBMI\_ 19800524\_2016\_000 | 1980-05-24 – Monti Sibillini

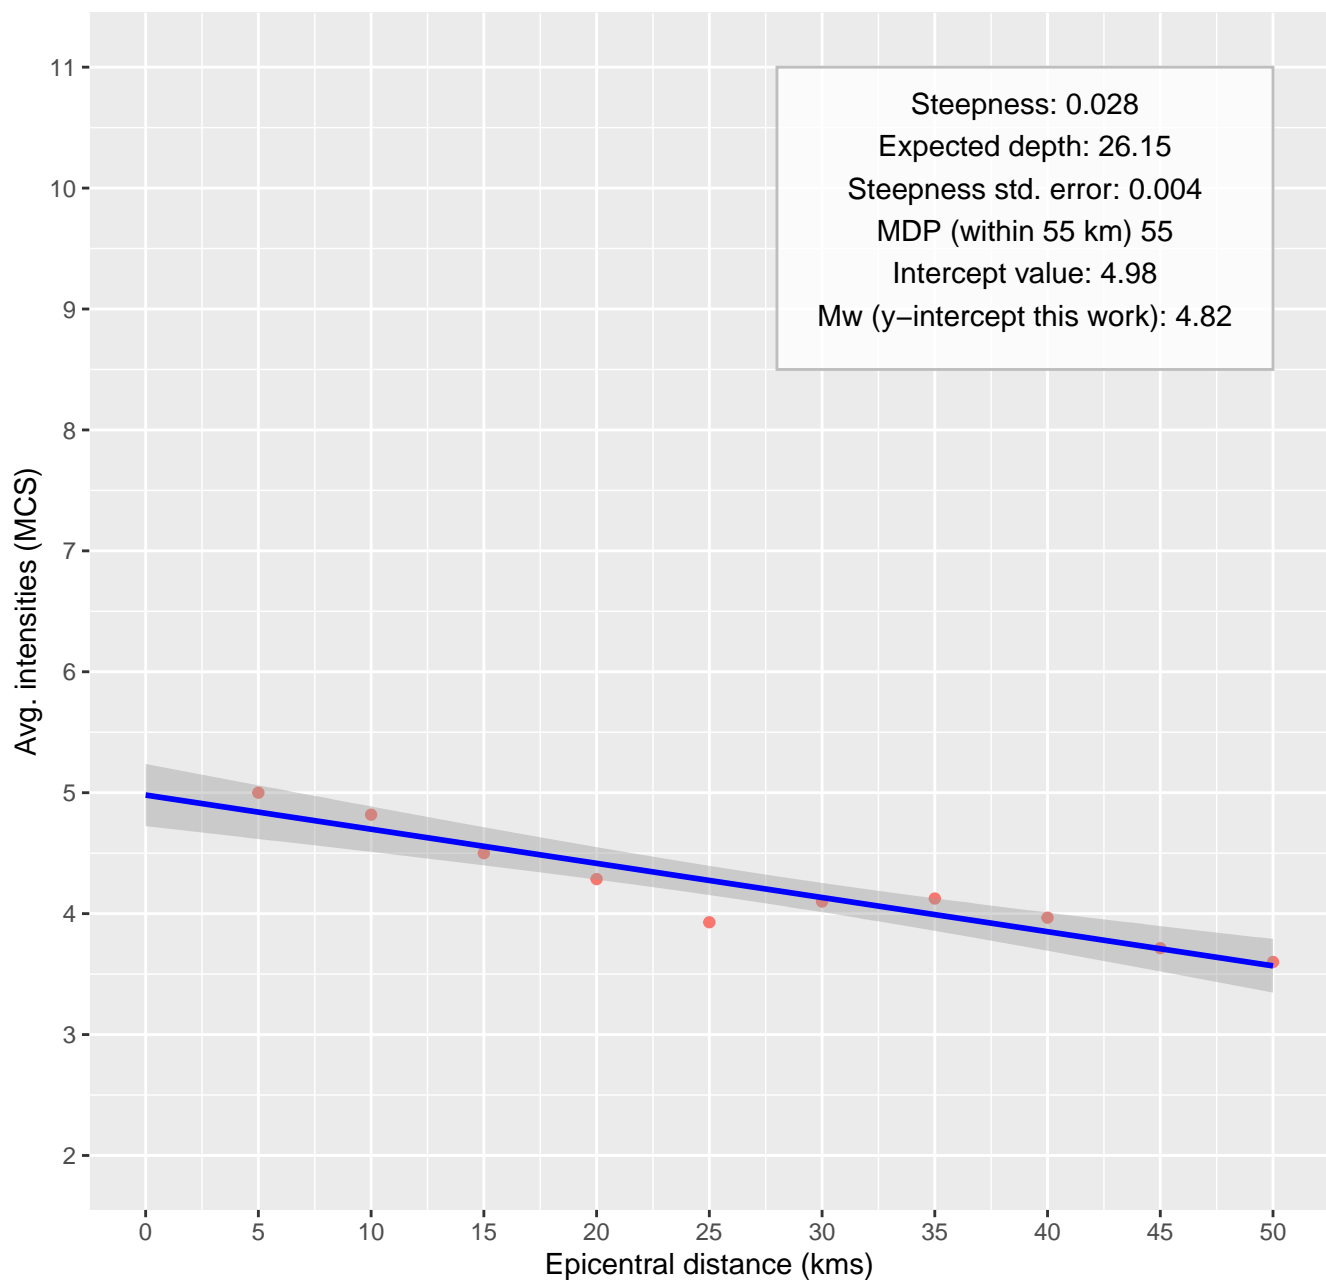

Supplement: Supplementary file 26 [file nhess-23-1007-2023-supplement.zip]

# DBMI\_ 19721126\_1603\_000 | 1972-11-26 – Marche meridionali

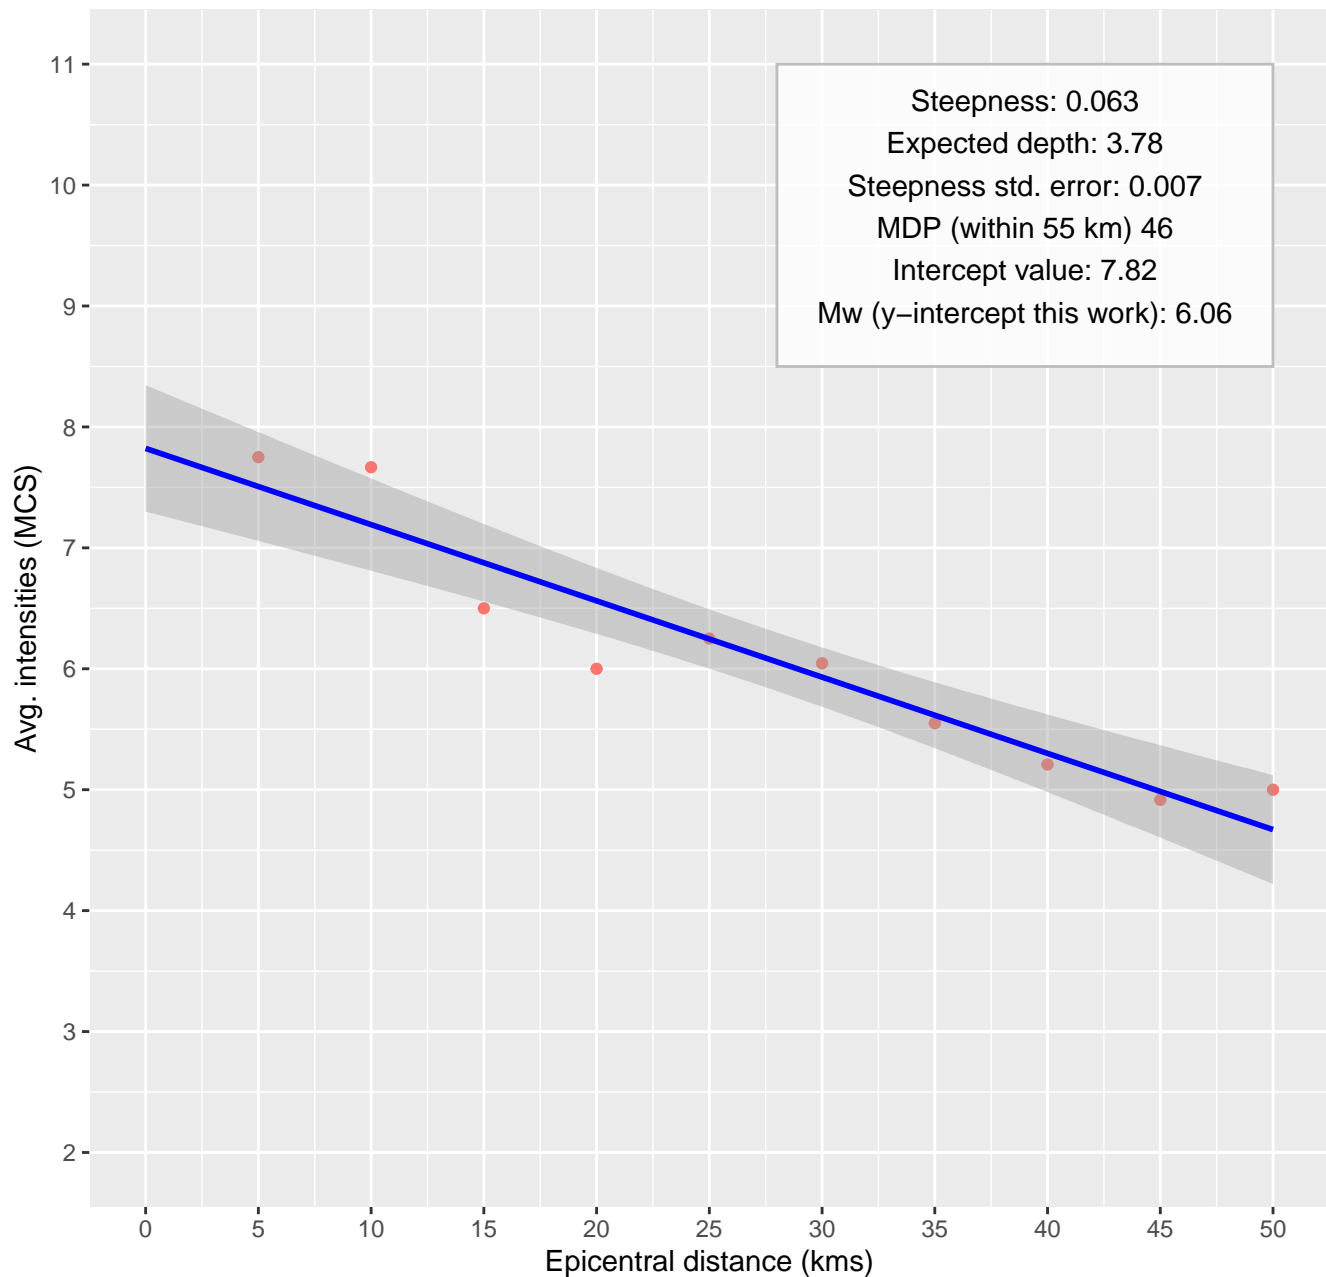

Supplement: Supplementary file 27 [file nhess-23-1007-2023-supplement.zip]

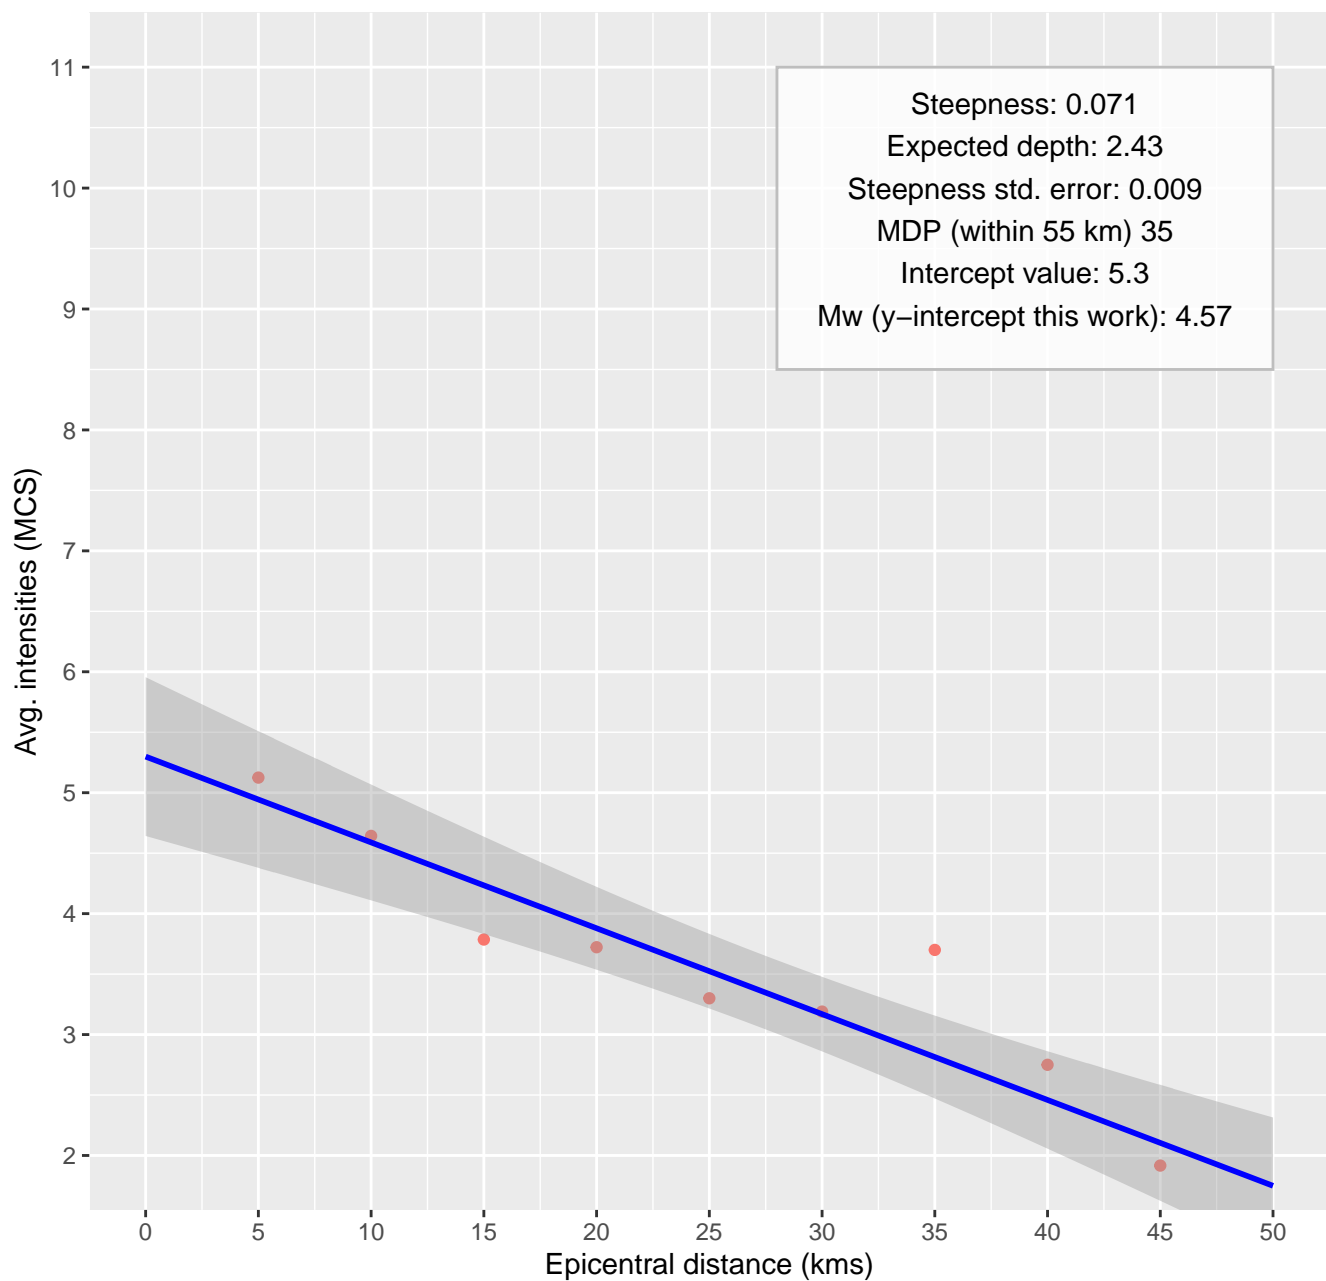

Supplement: Supplementary file 28 [file nhess-23-1007-2023-supplement.zip]

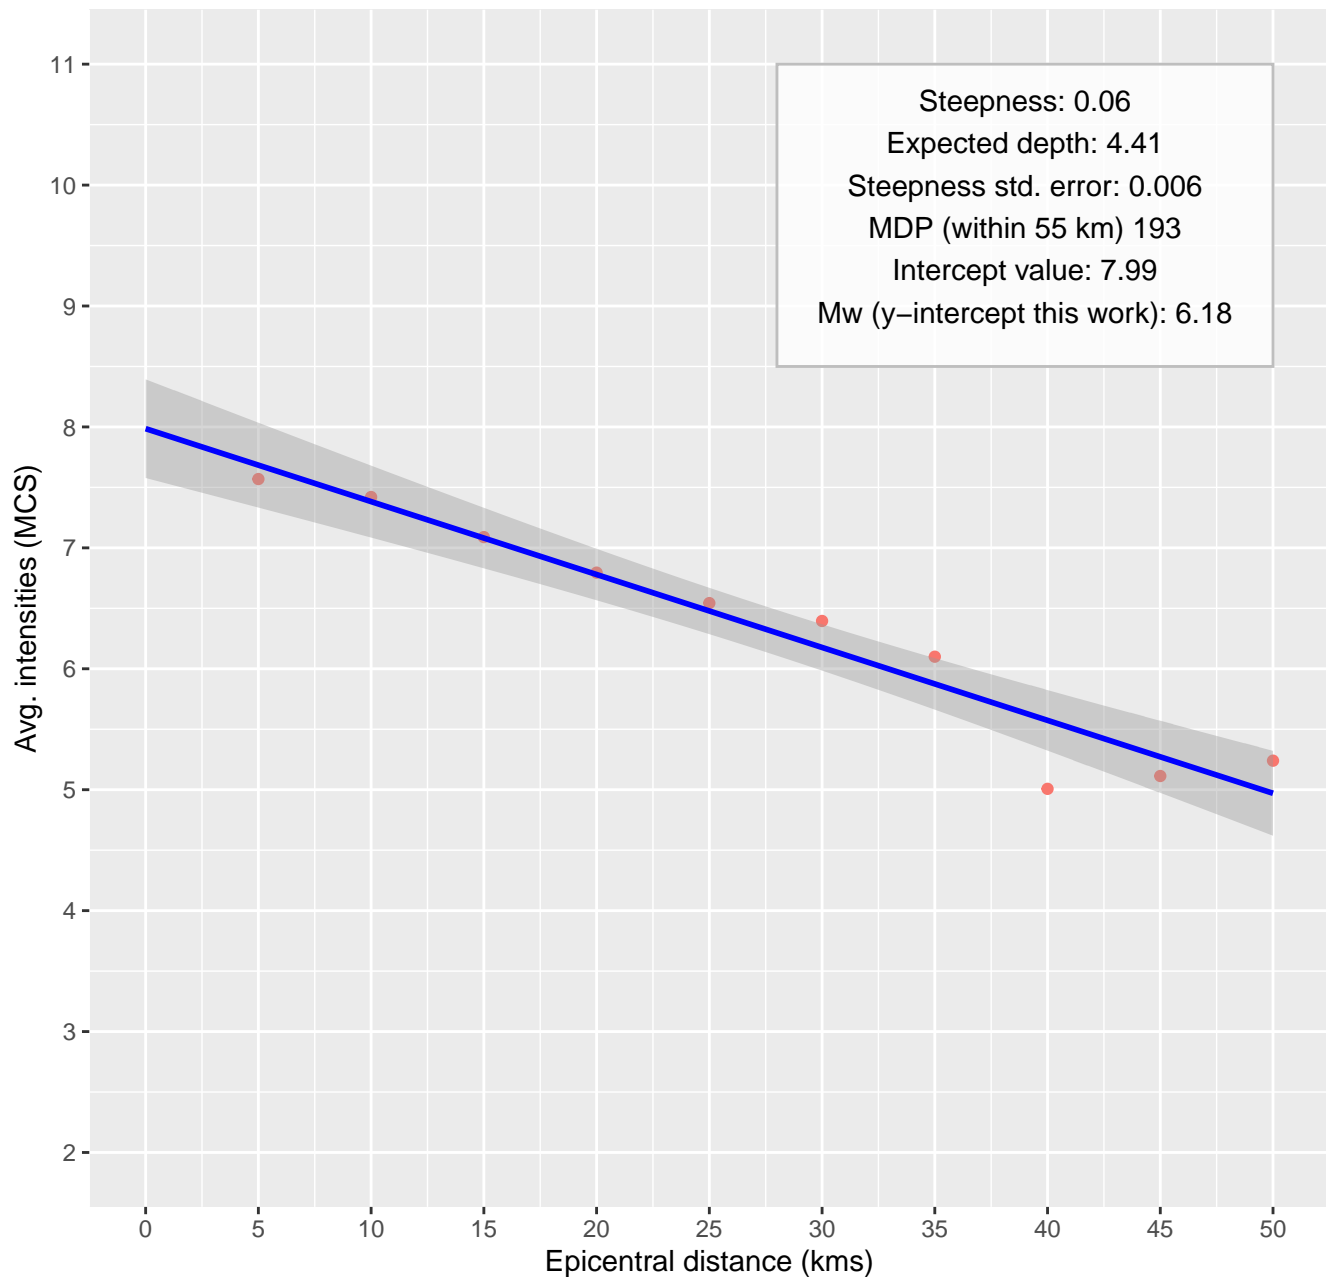

Supplement: Supplementary file 29 [file nhess-23-1007-2023-supplement.zip]

# DBMI\_ 19290419\_0415\_000 | 1929-04-19 – Bolognese

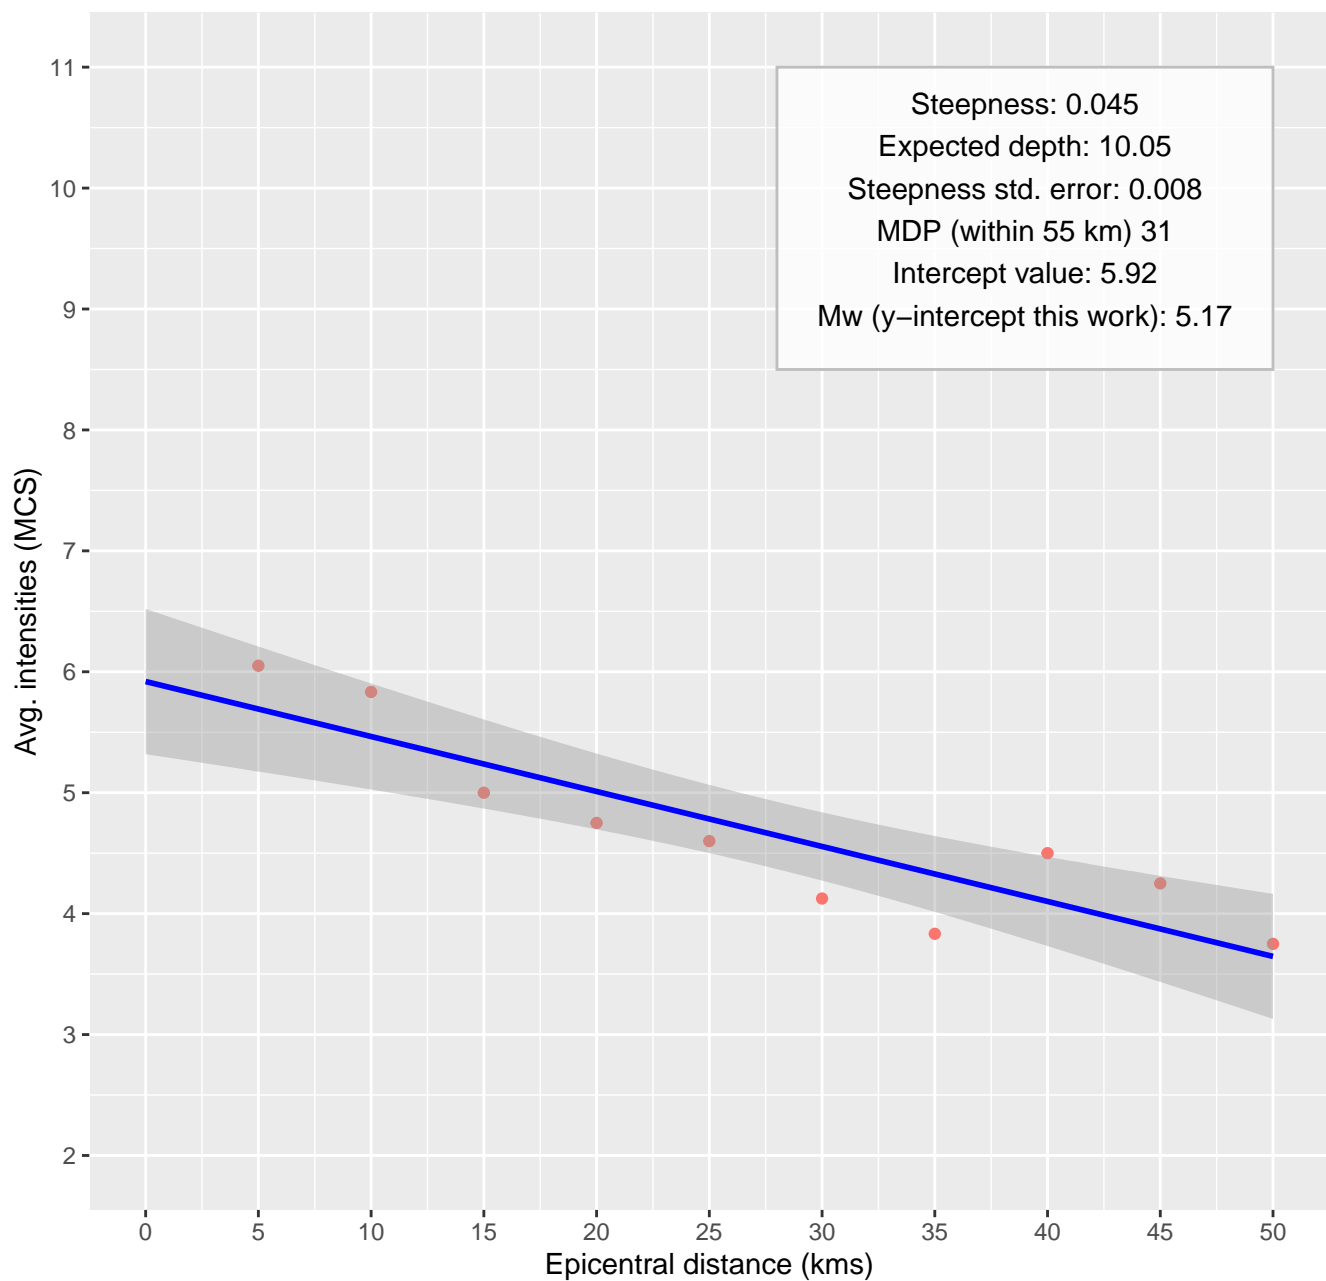

Supplement: Supplementary file 30 [file nhess-23-1007-2023-supplement.zip]

# DBMI\_ 16380327\_1505\_000 | 1638-03-27 – Calabria centrale

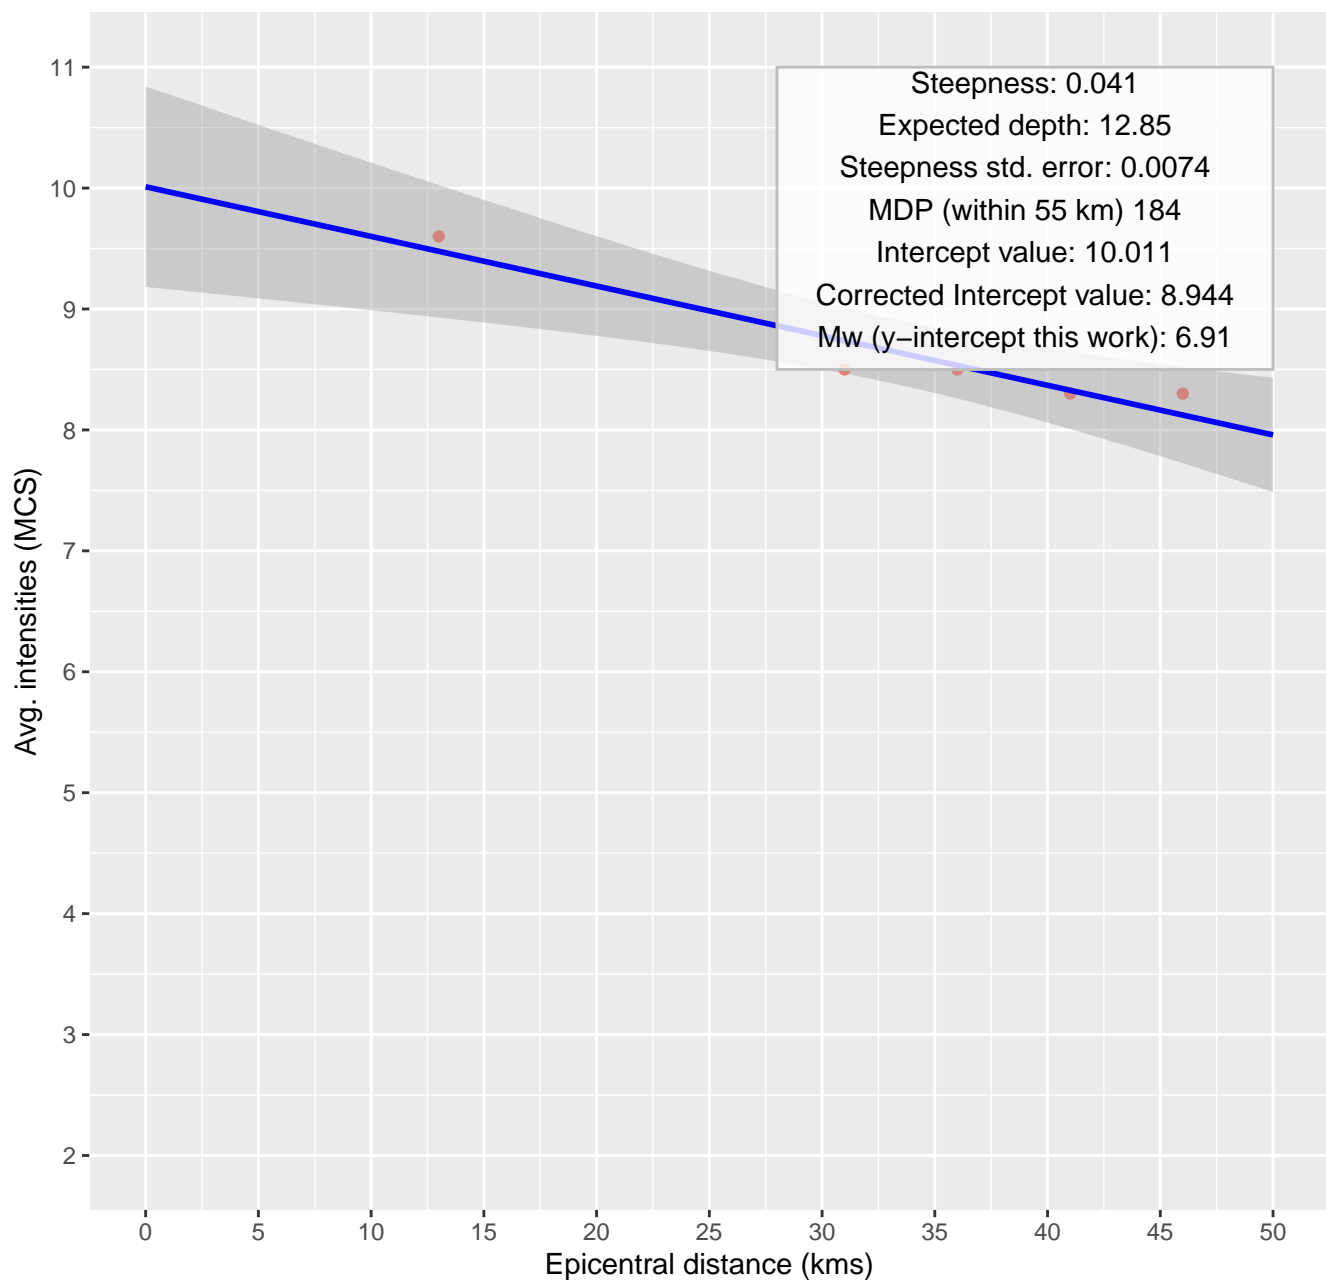

Supplement: Supplementary file 31 [file nhess-23-1007-2023-supplement.zip]

# DBMI\_ 19071218\_1921\_000 | 1907-12-18 – Monti Picentini

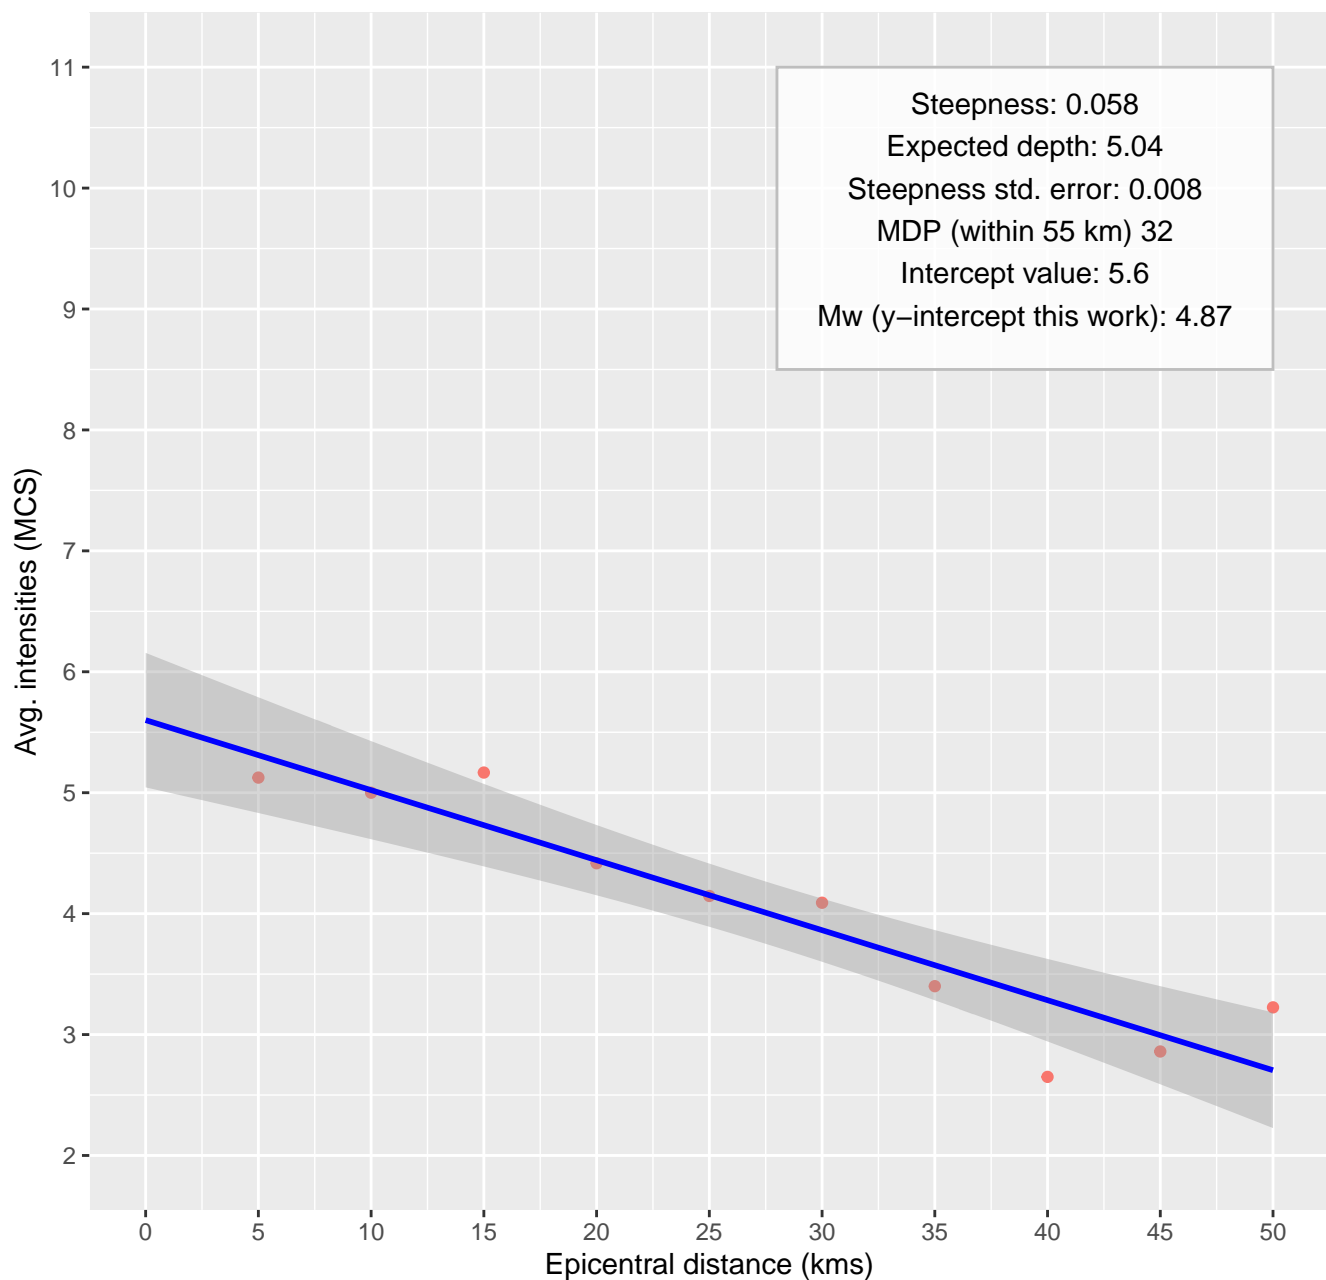

Supplement: Supplementary file 32 [file nhess-23-1007-2023-supplement.zip]

# DBMI\_ 19560426\_0300\_000 | 1956-04-26 – Appennino bolognese

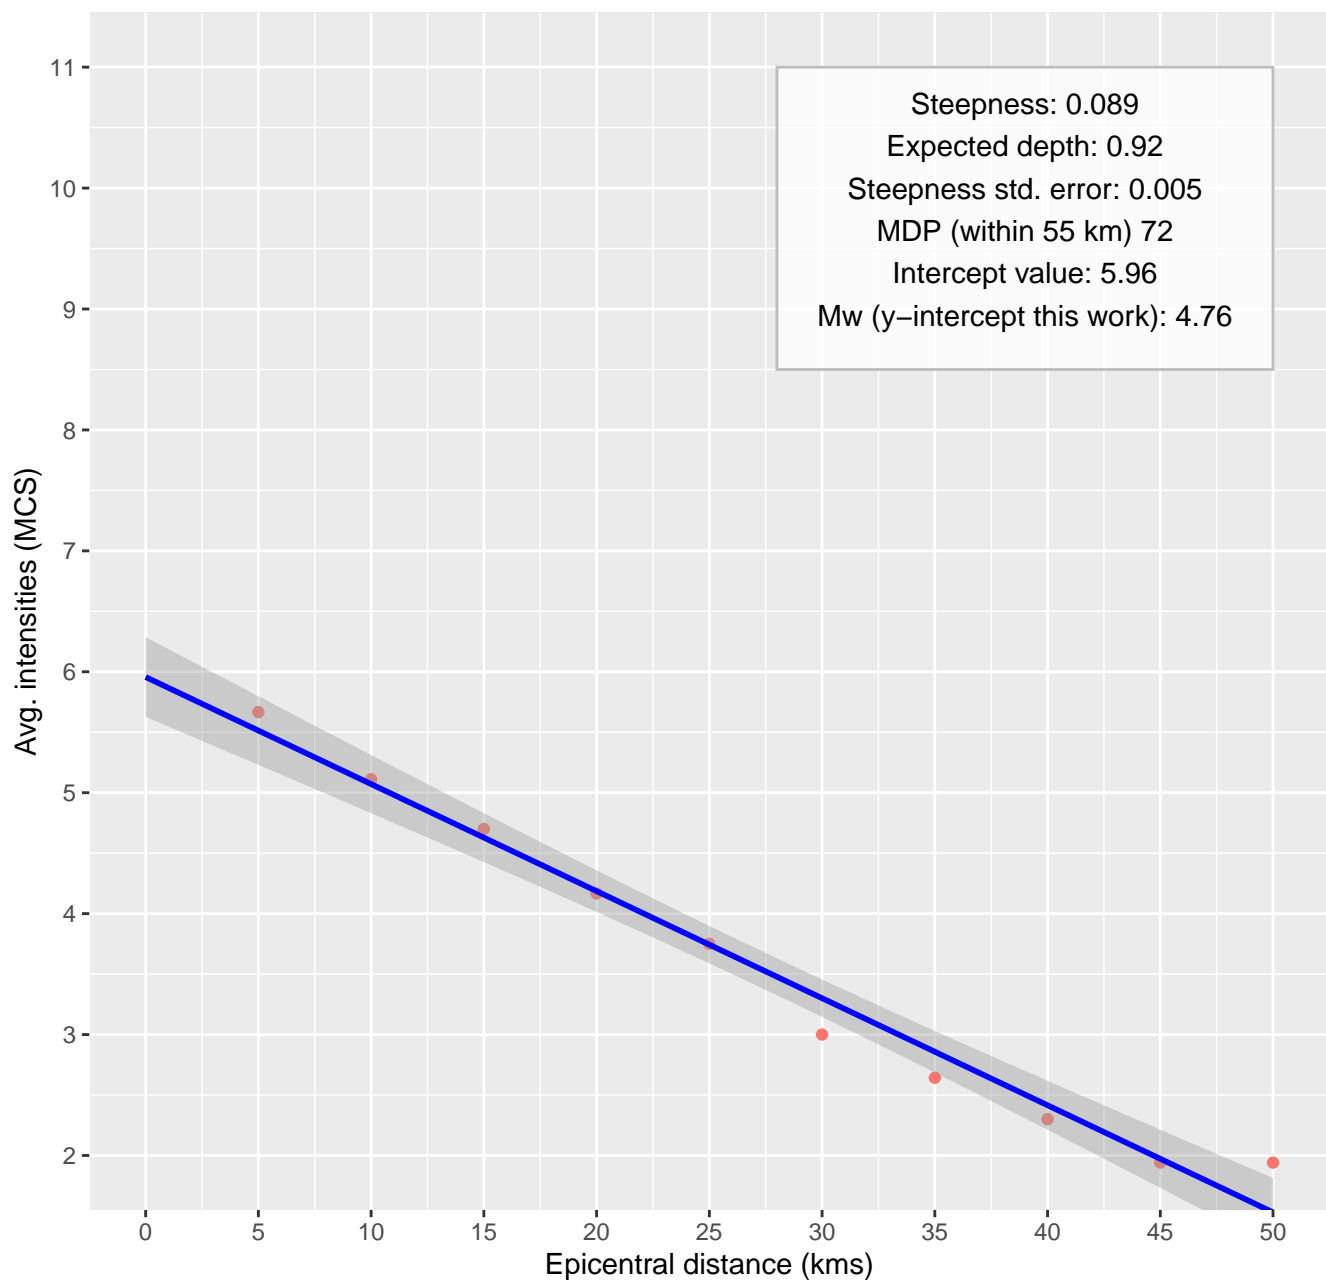

Supplement: Supplementary file 33 [file nhess-23-1007-2023-supplement.zip]

# DBMI\_ 19181110\_1512\_000 | 1918-11-10 – Appennino forlivese

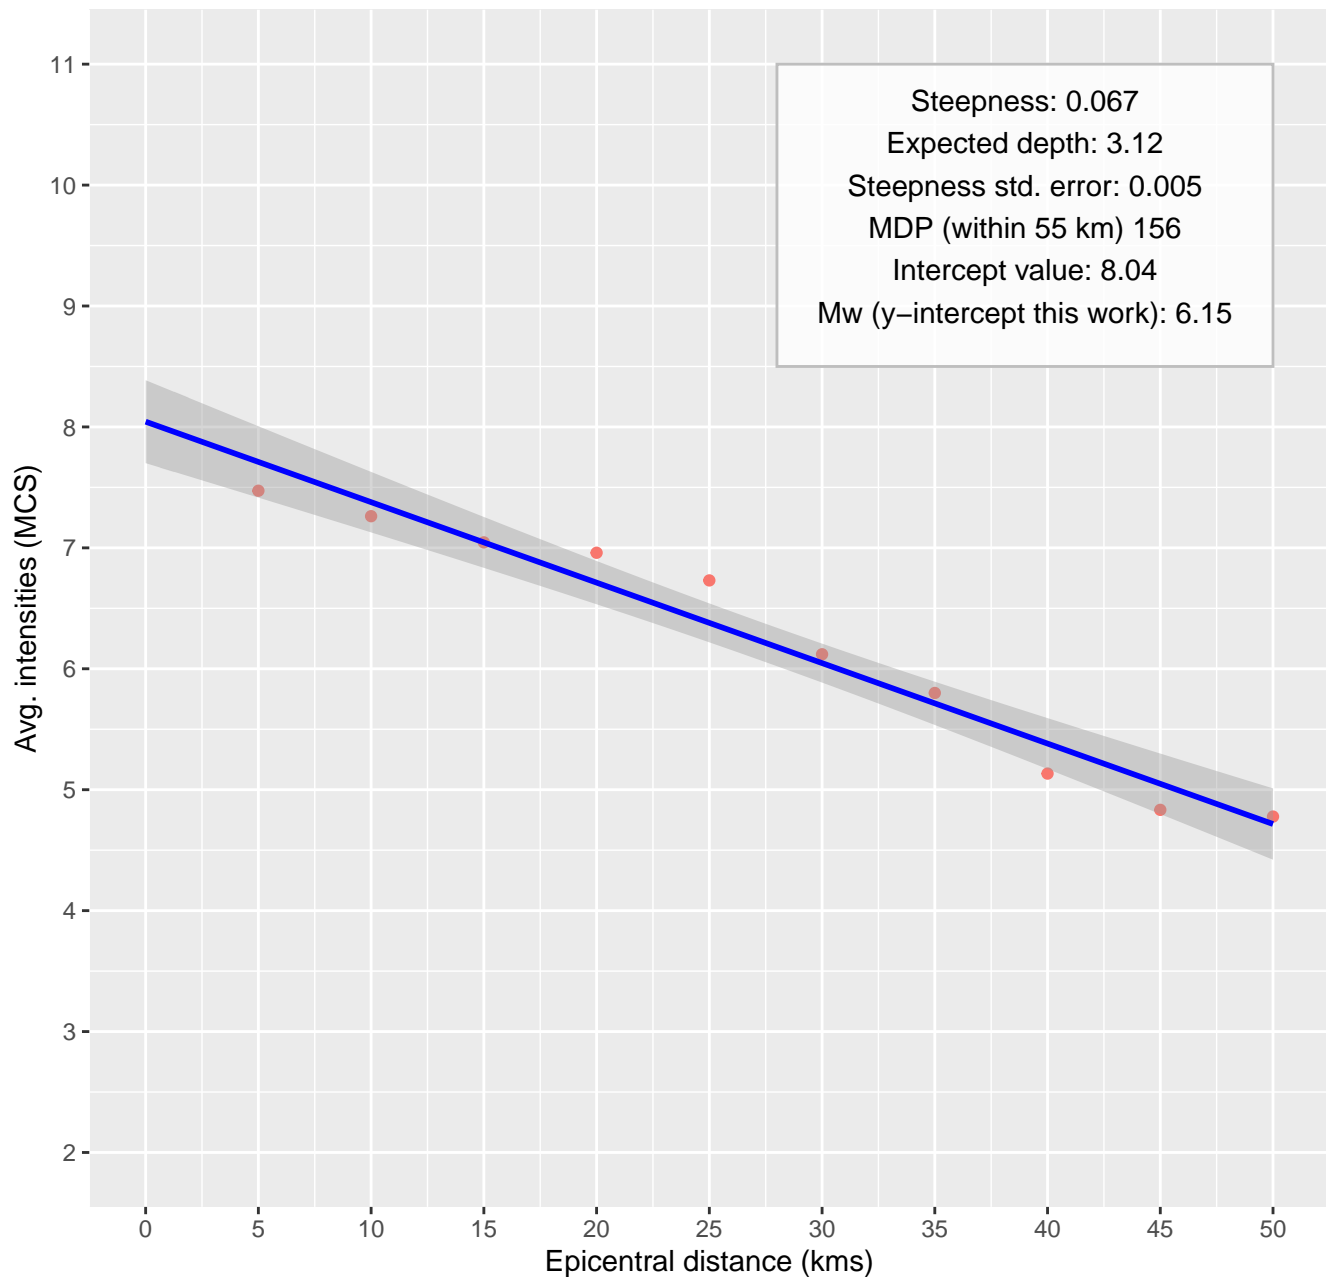

Supplement: Supplementary file 34 [file nhess-23-1007-2023-supplement.zip]

# DBMI\_ 19560526\_1840\_000 | 1956-05-26 – Appennino forlivese

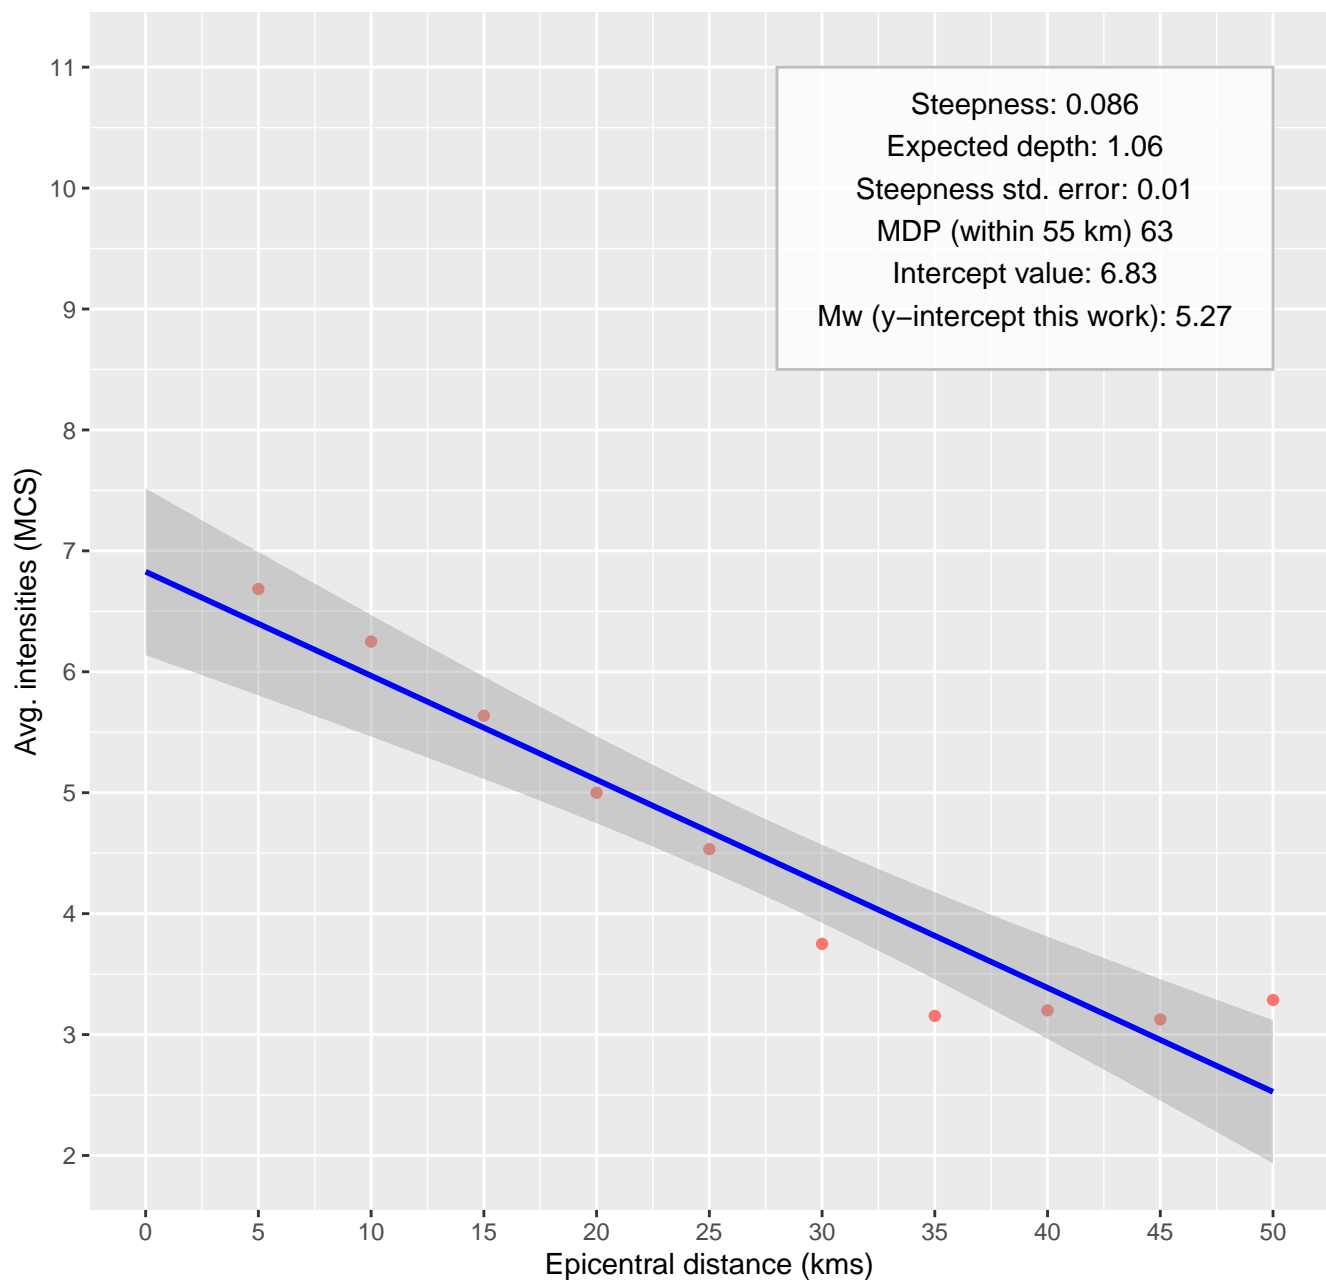

Supplement: Supplementary file 35 [file nhess-23-1007-2023-supplement.zip]

# DBMI\_ 19710206\_1809\_000 | 1971-02-06 – Tuscania

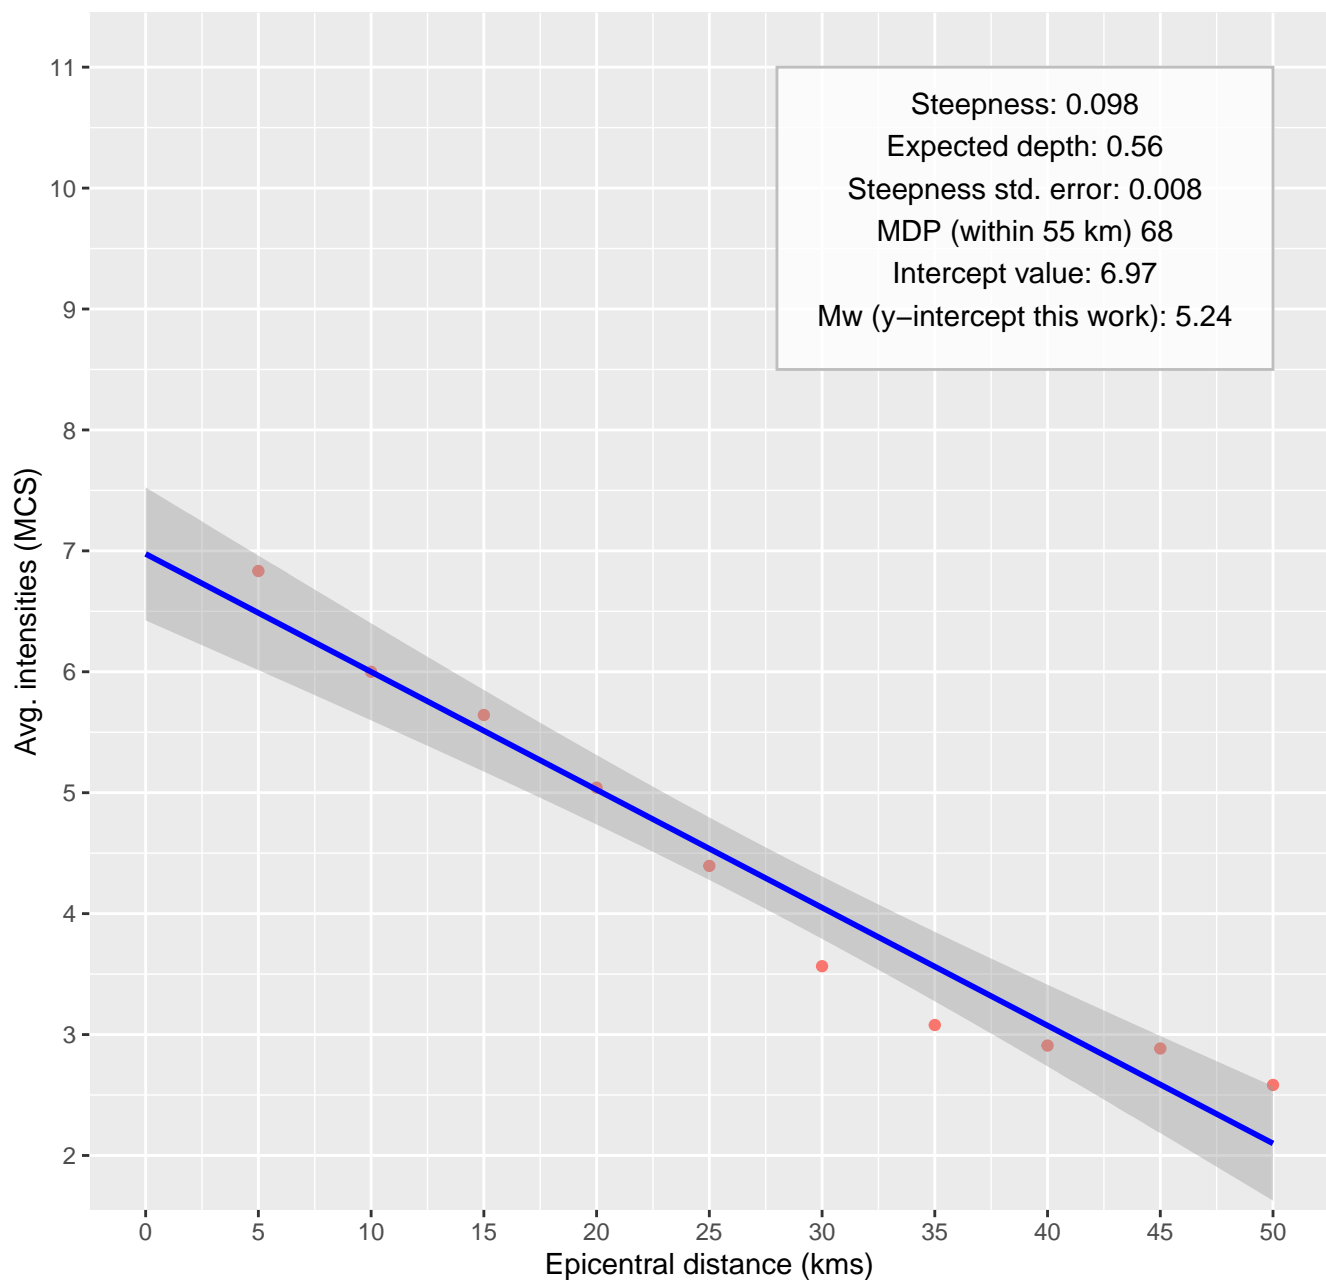

Supplement: Supplementary file 36 [file nhess-23-1007-2023-supplement.zip]

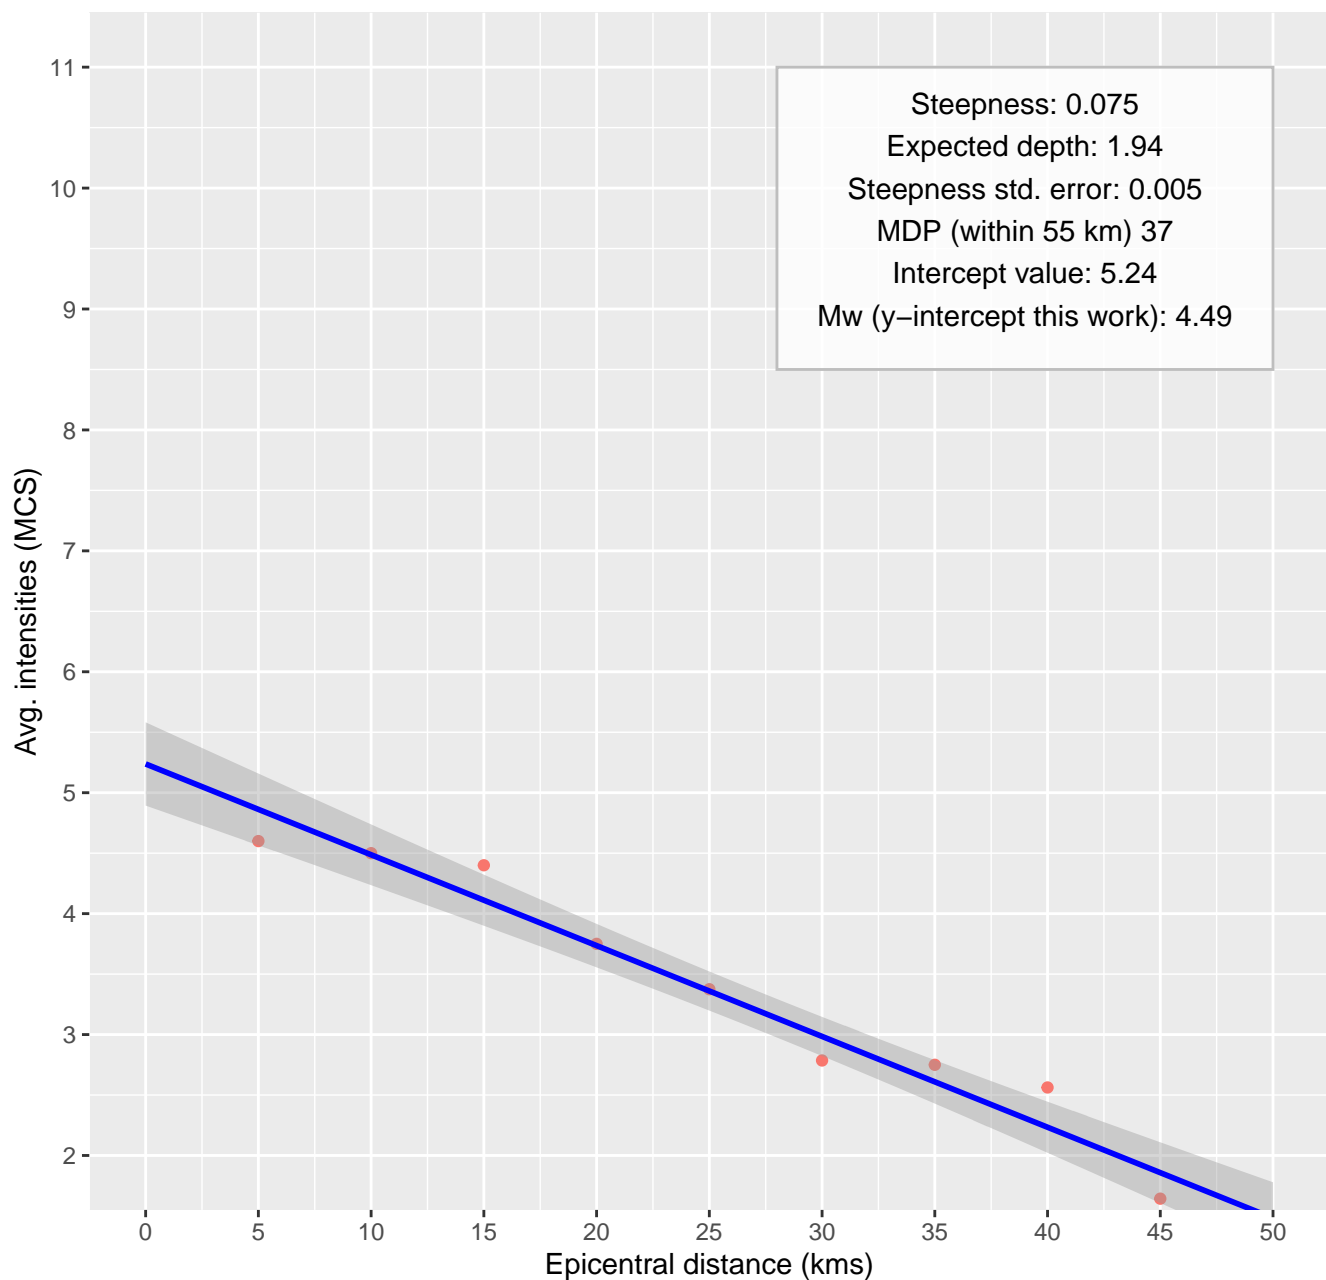

Supplement: Supplementary file 37 [file nhess-23-1007-2023-supplement.zip]

# DBMI\_ 19221229\_1222\_000 | 1922-12-29 – Val Roveto

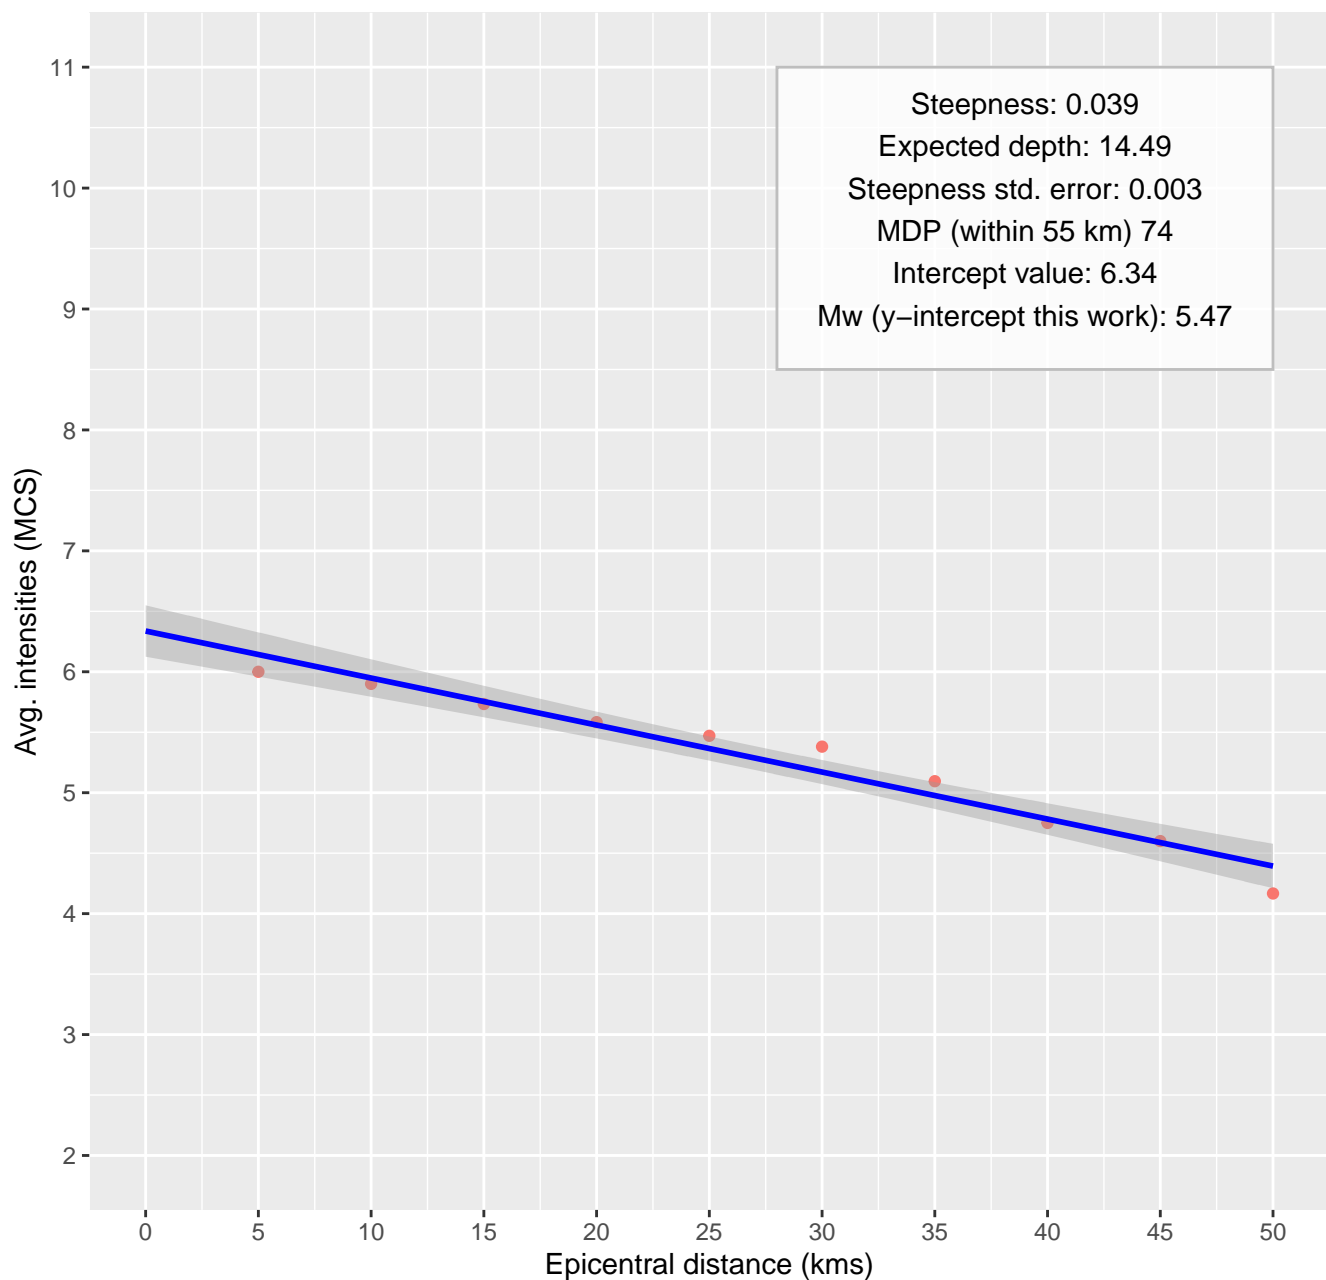

Supplement: Supplementary file 38 [file nhess-23-1007-2023-supplement.zip]

# DBMI\_ 19481231\_0332\_000 | 1948-12-31 – Monti Reatini

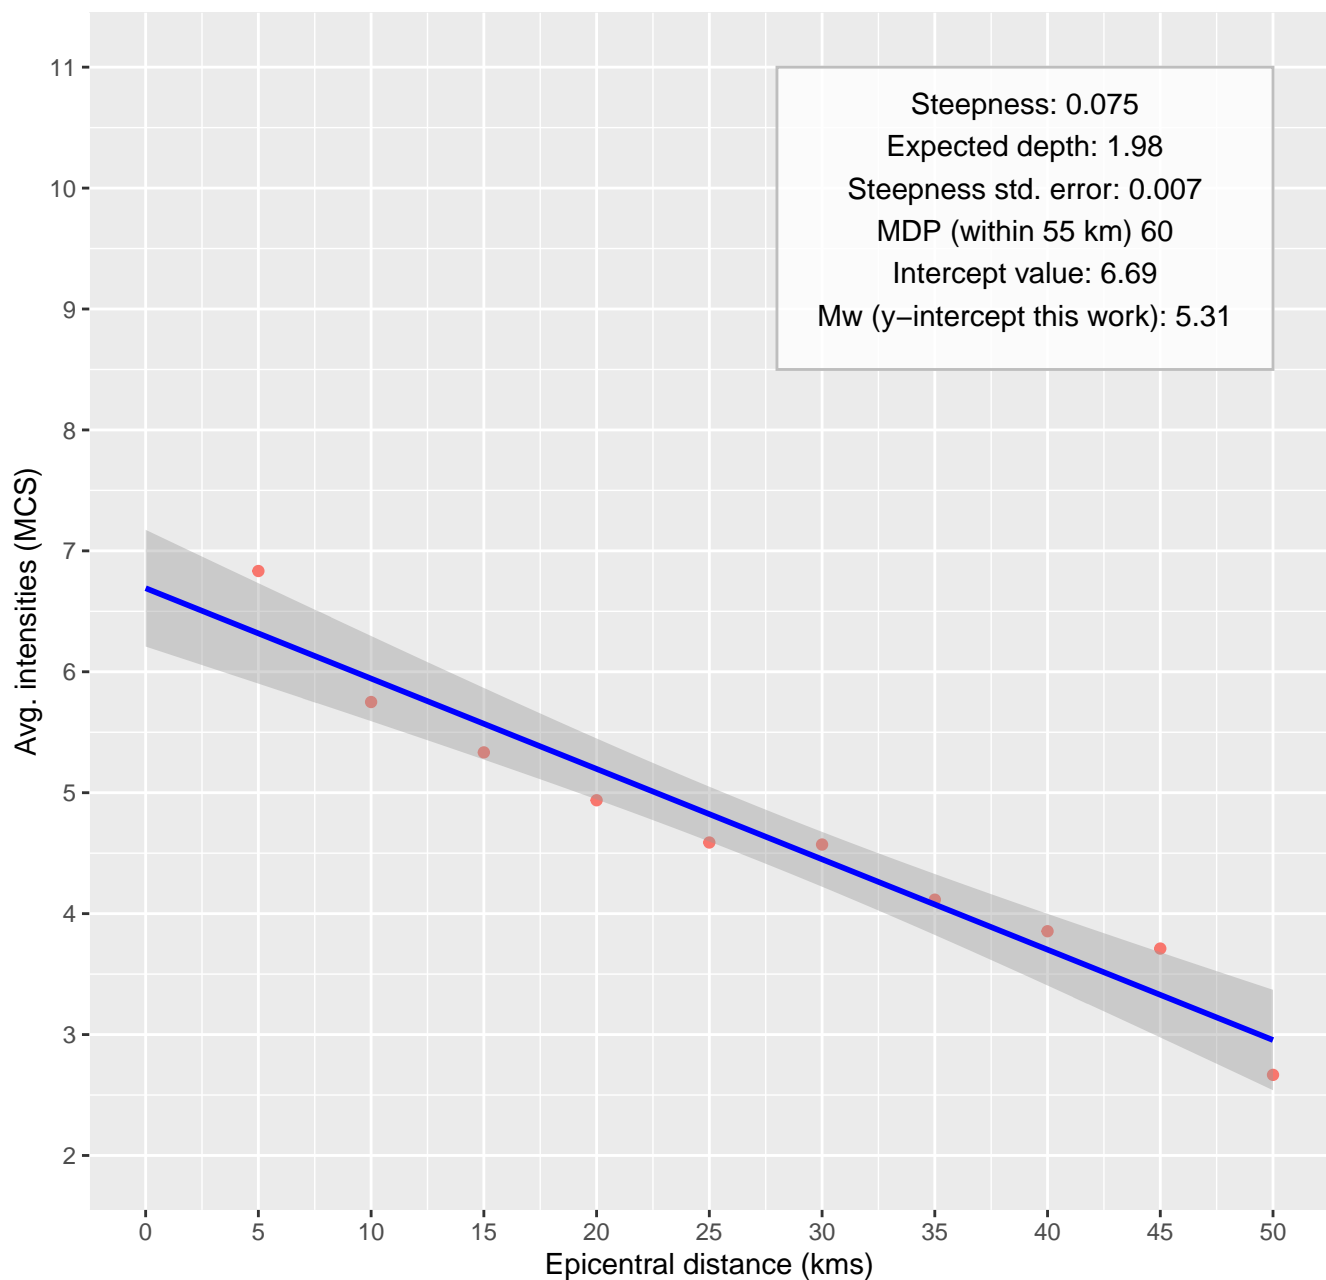

Supplement: Supplementary file 39 [file nhess-23-1007-2023-supplement.zip]

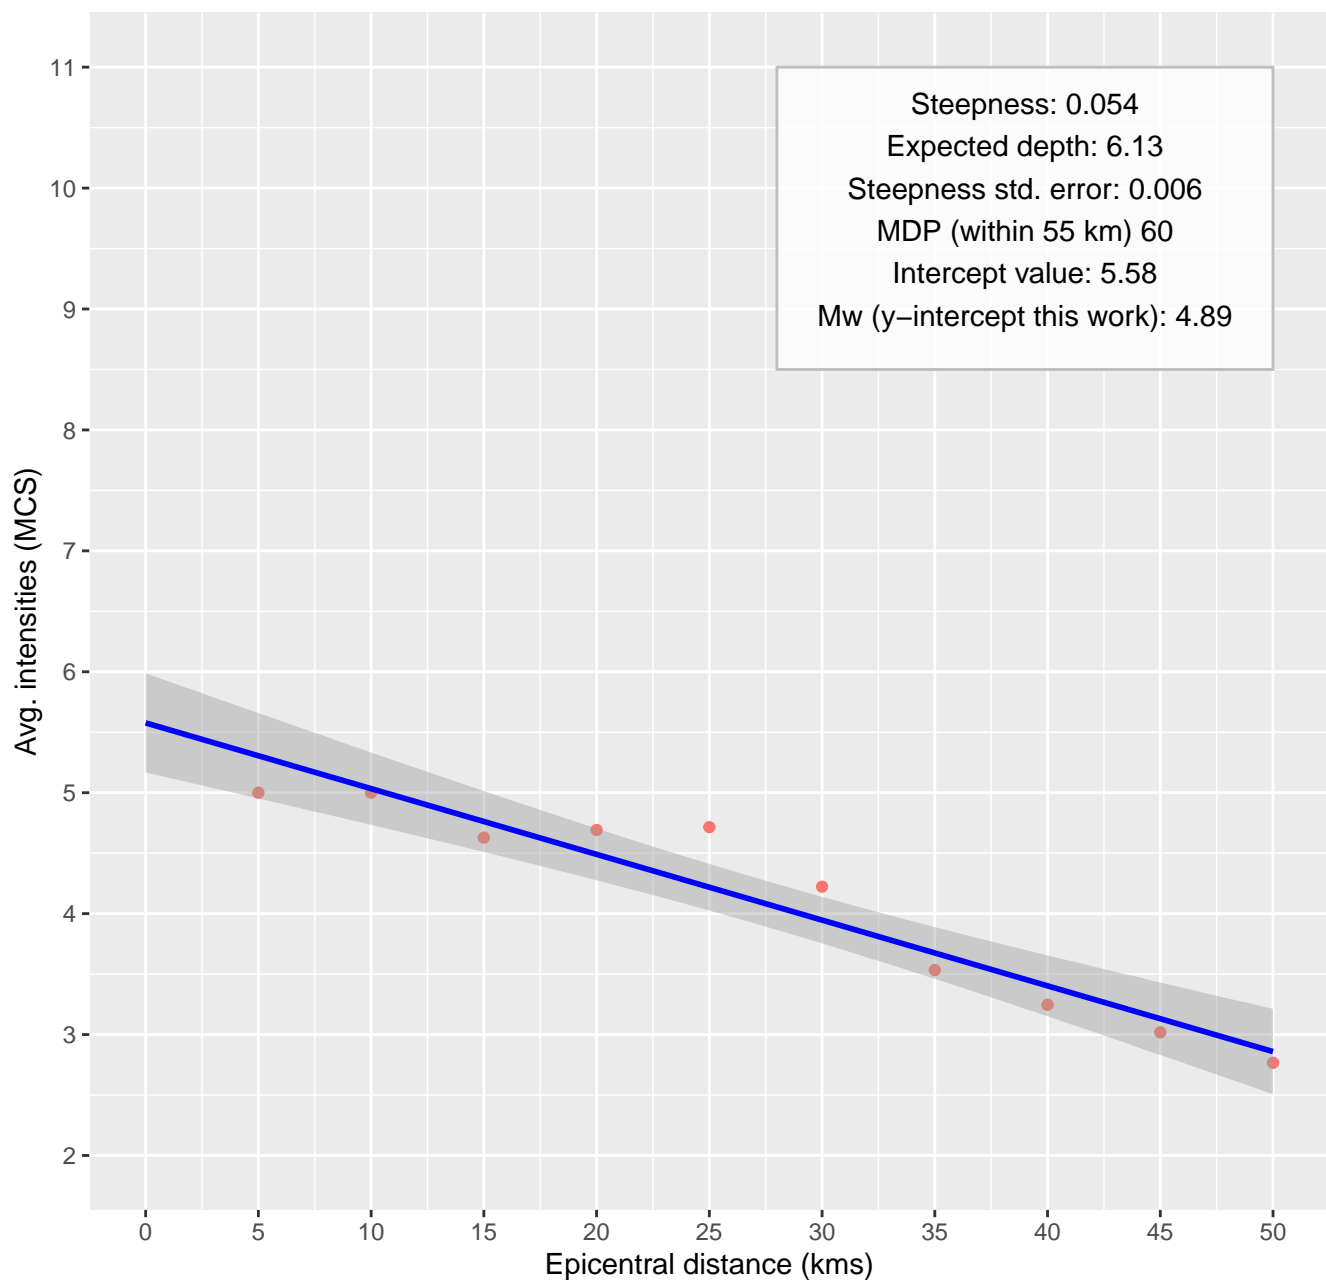

Supplement: Supplementary file 40 [file nhess-23-1007-2023-supplement.zip]

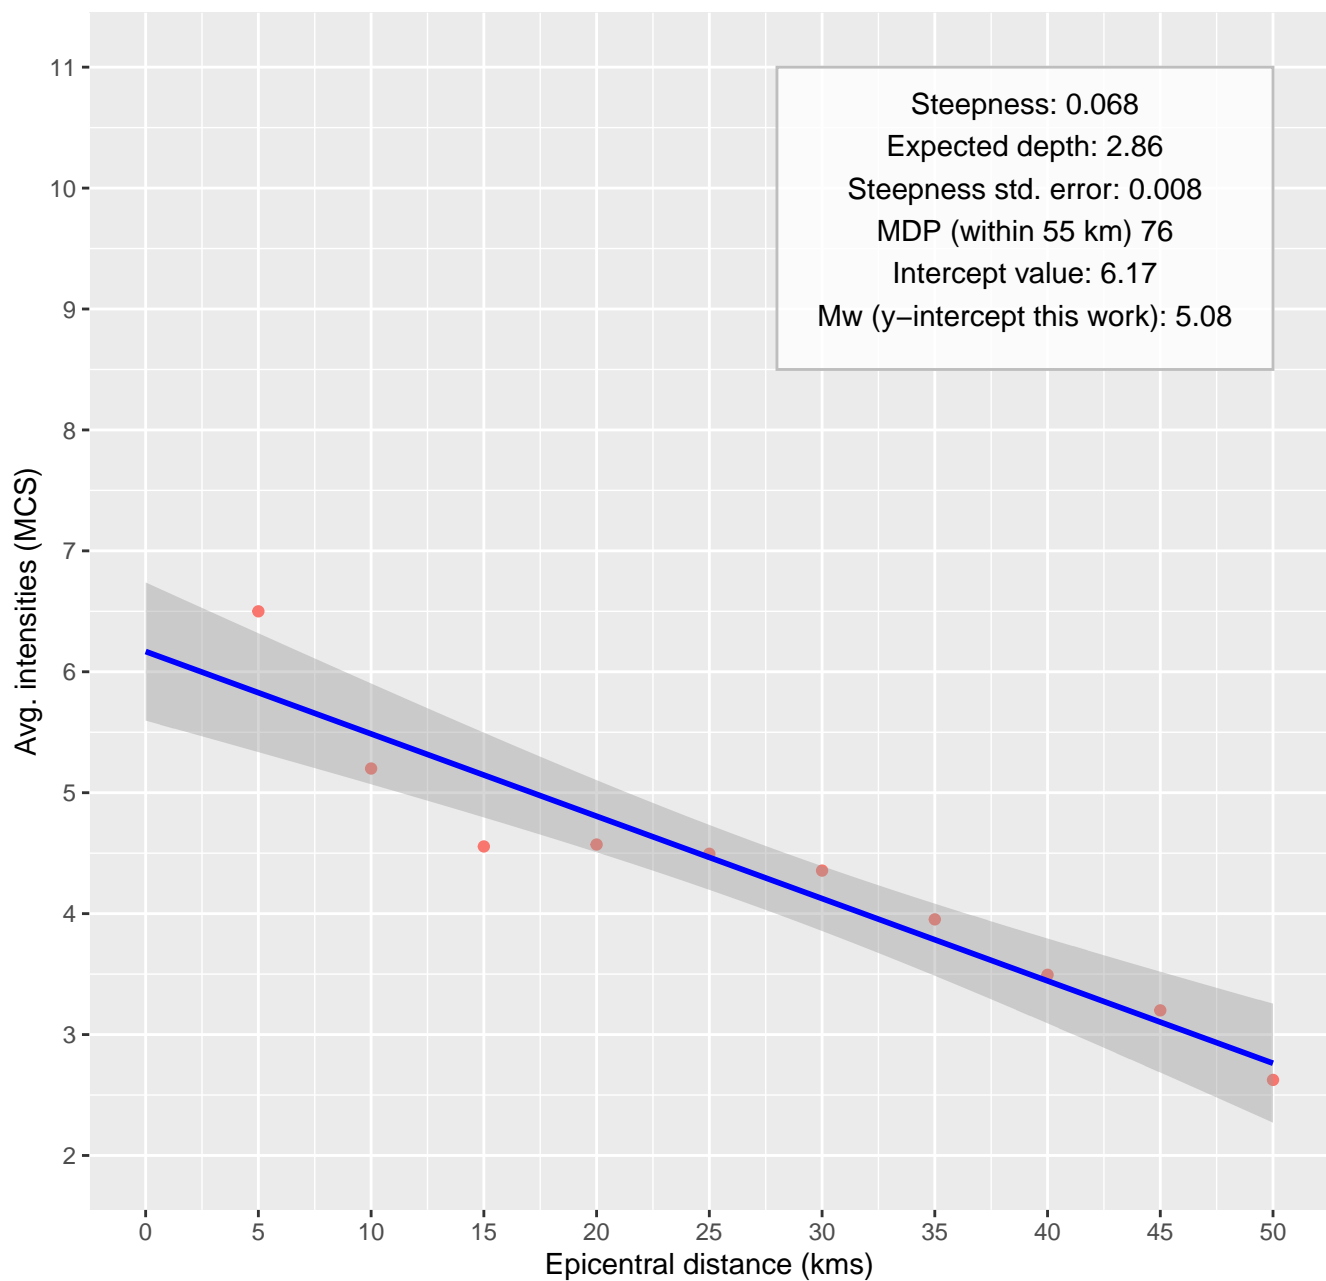

Supplement: Supplementary file 41 [file nhess-23-1007-2023-supplement.zip]

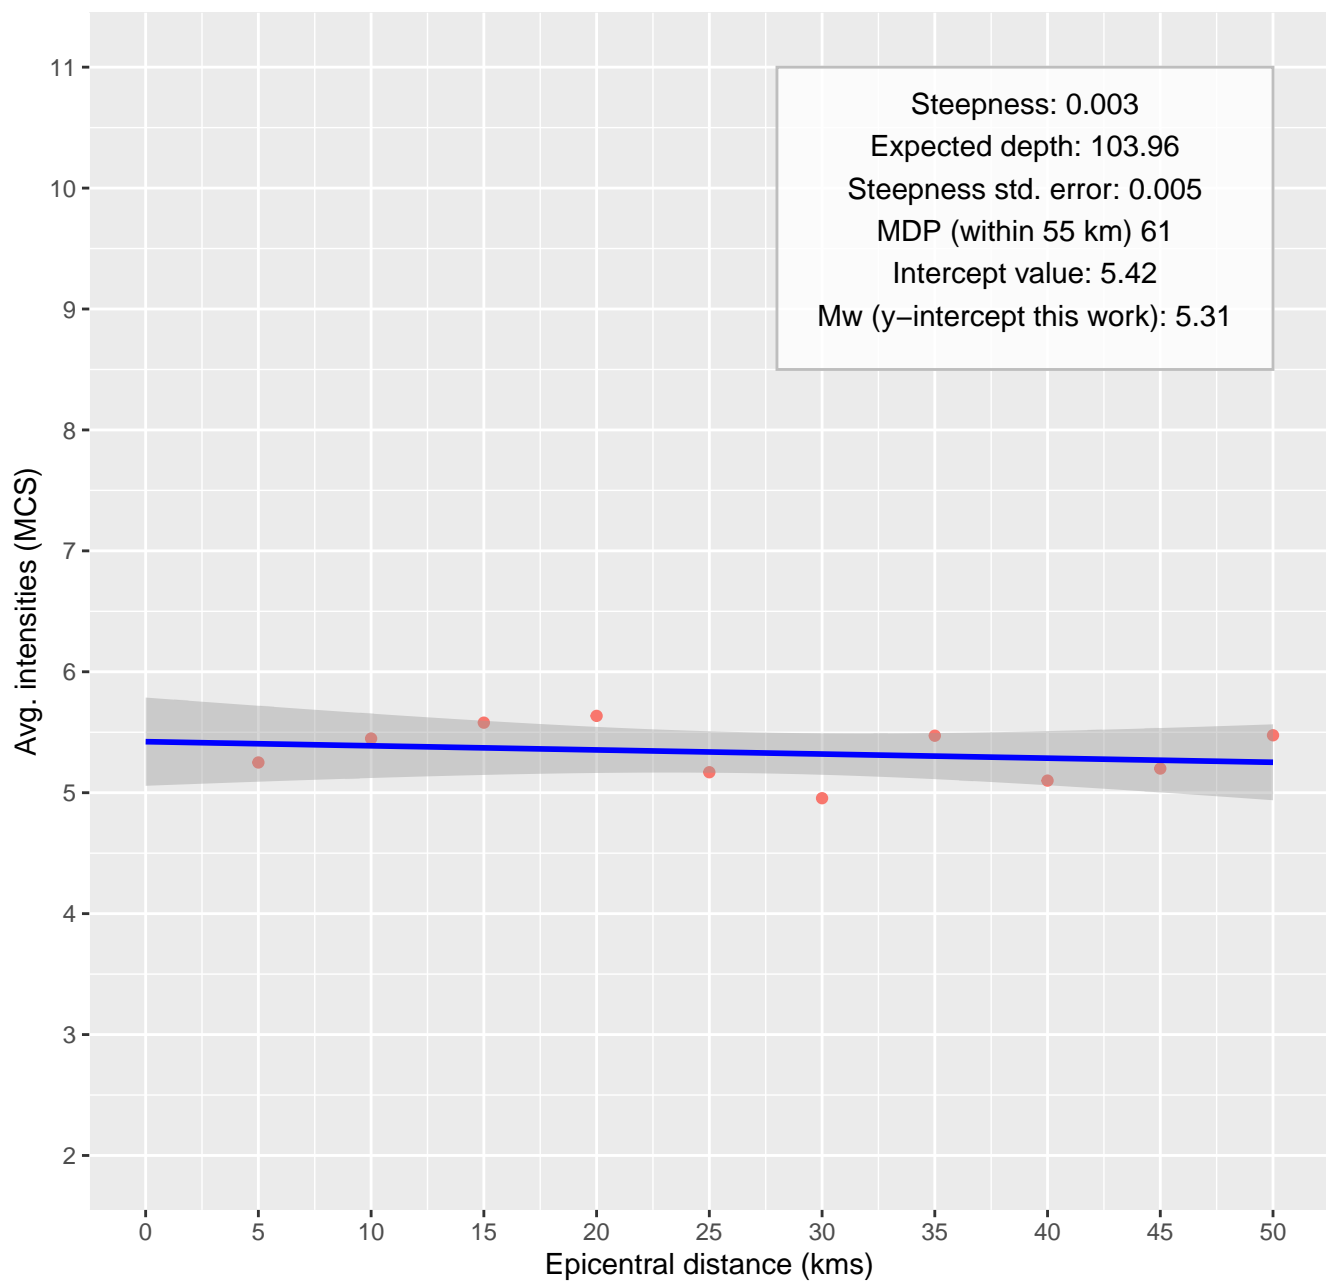

Supplement: Supplementary file 42 [file nhess-23-1007-2023-supplement.zip]

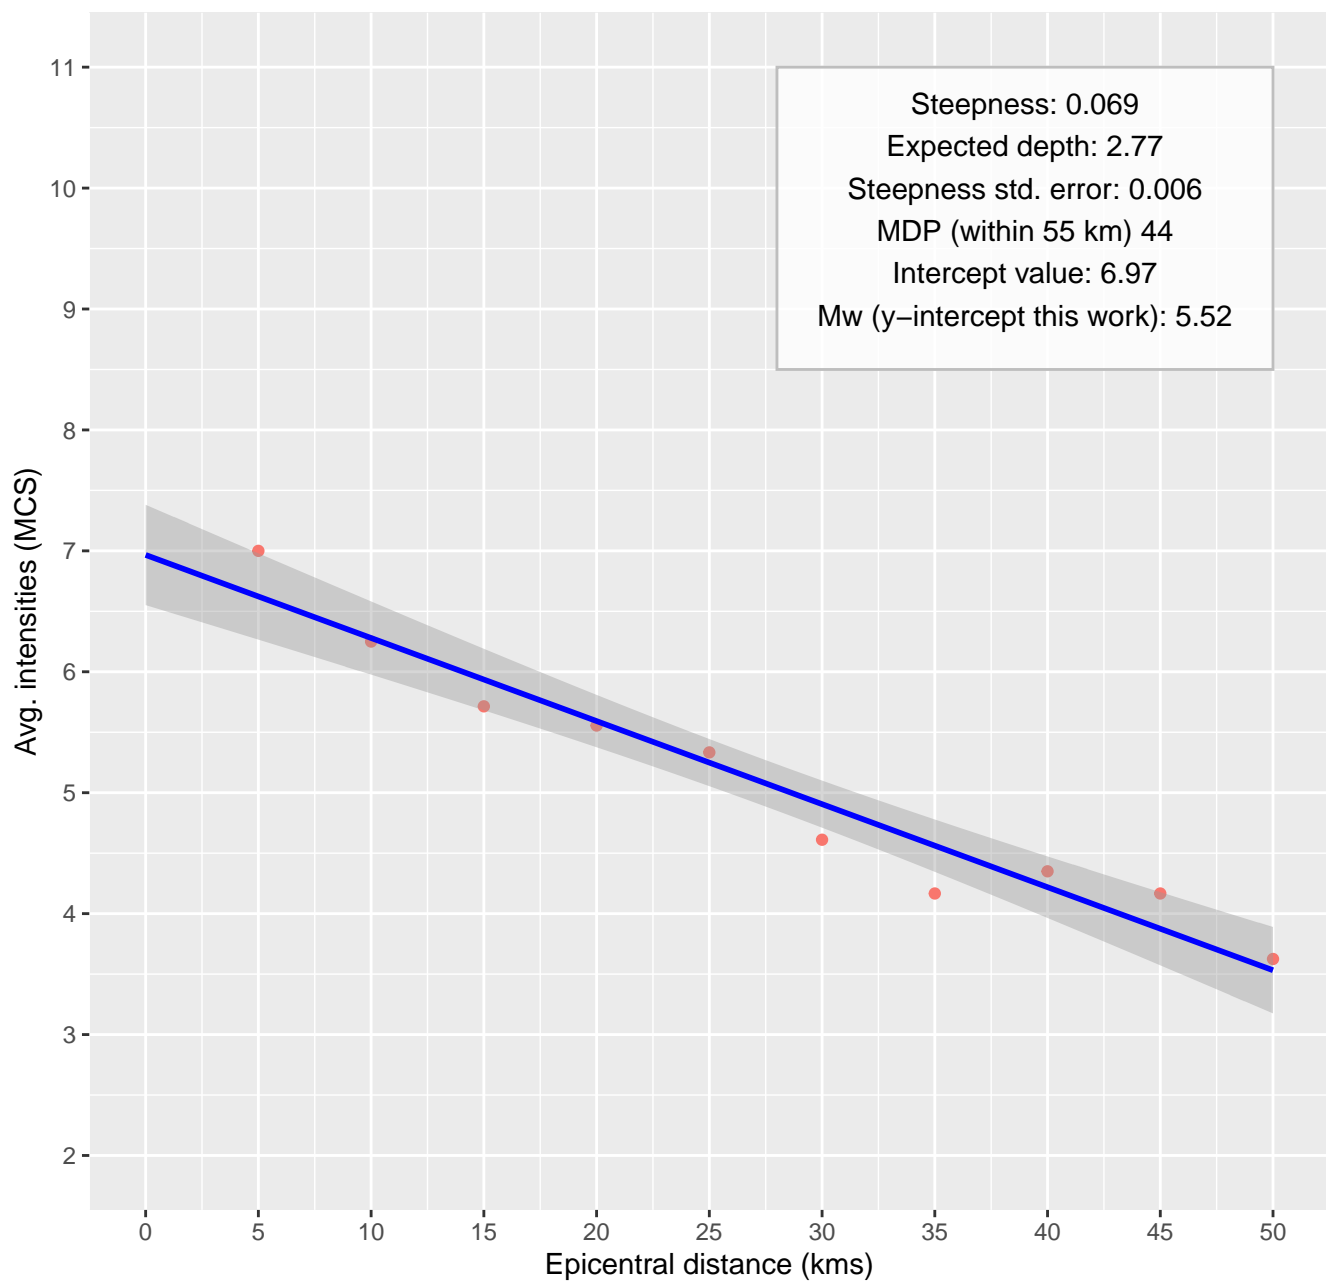

Supplement: Supplementary file 43 [file nhess-23-1007-2023-supplement.zip]

# DBMI\_ 19820901\_1533\_000 | 1982-09-01 – Valle del Serchio

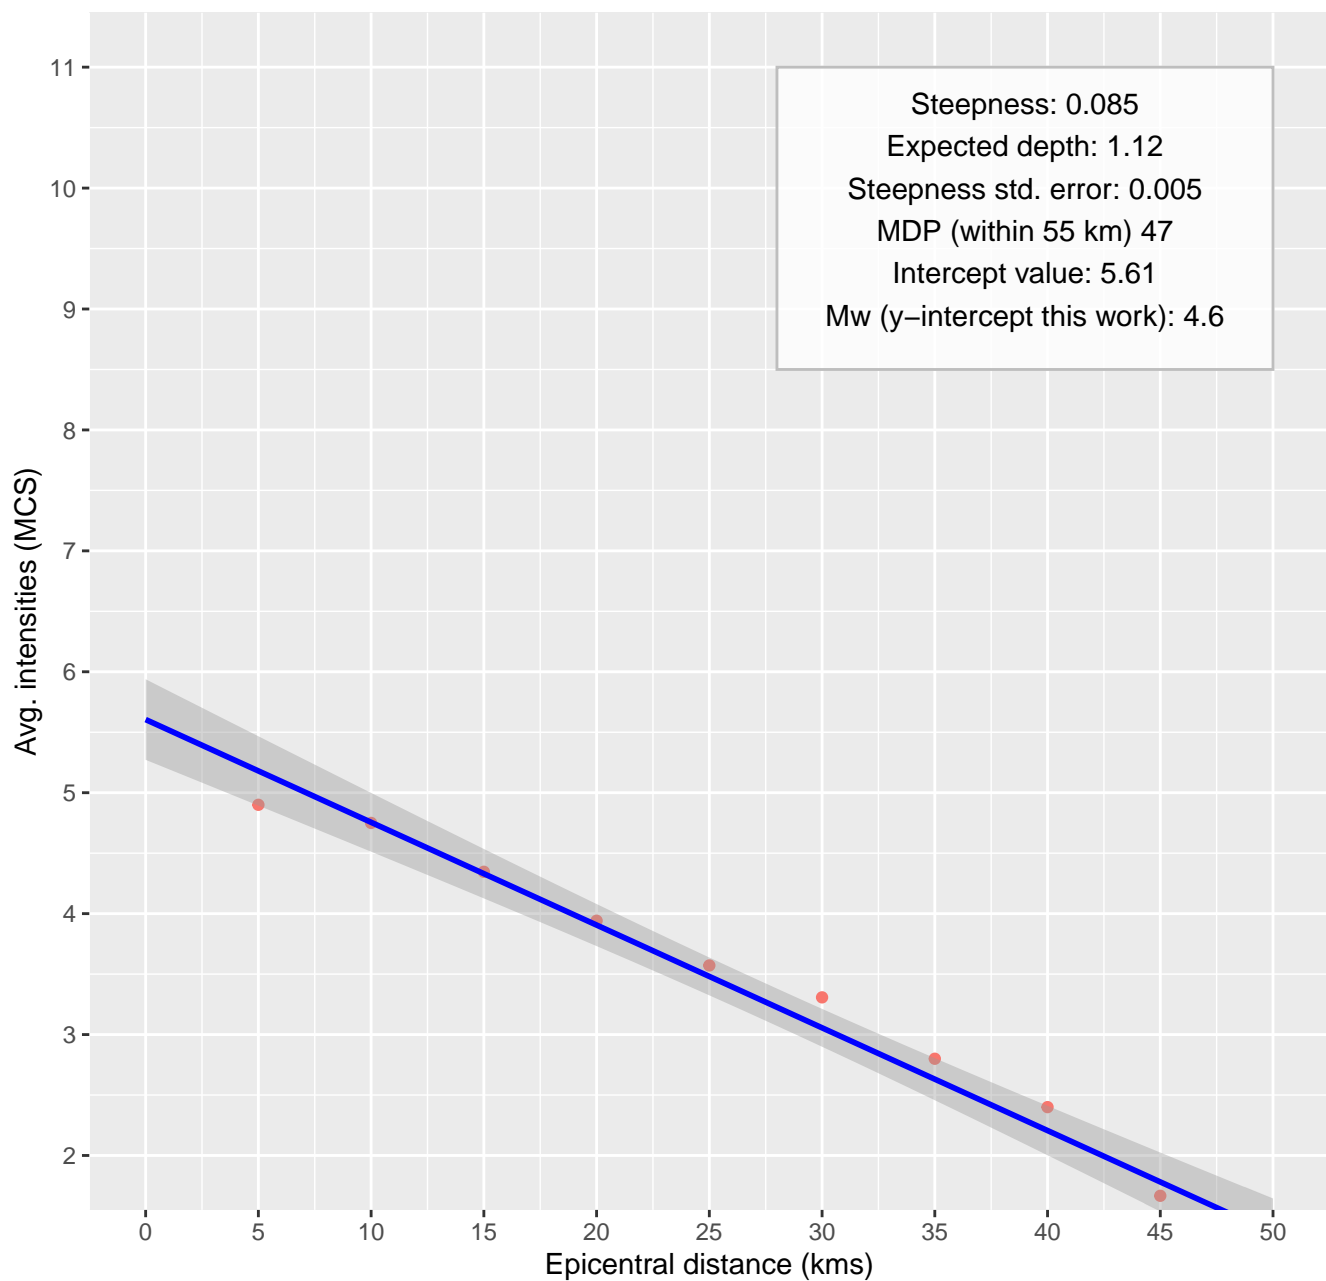

Supplement: Supplementary file 44 [file nhess-23-1007-2023-supplement.zip]

# DBMI\_ 19510808\_1956\_000 | 1951-08-08 – Gran Sasso

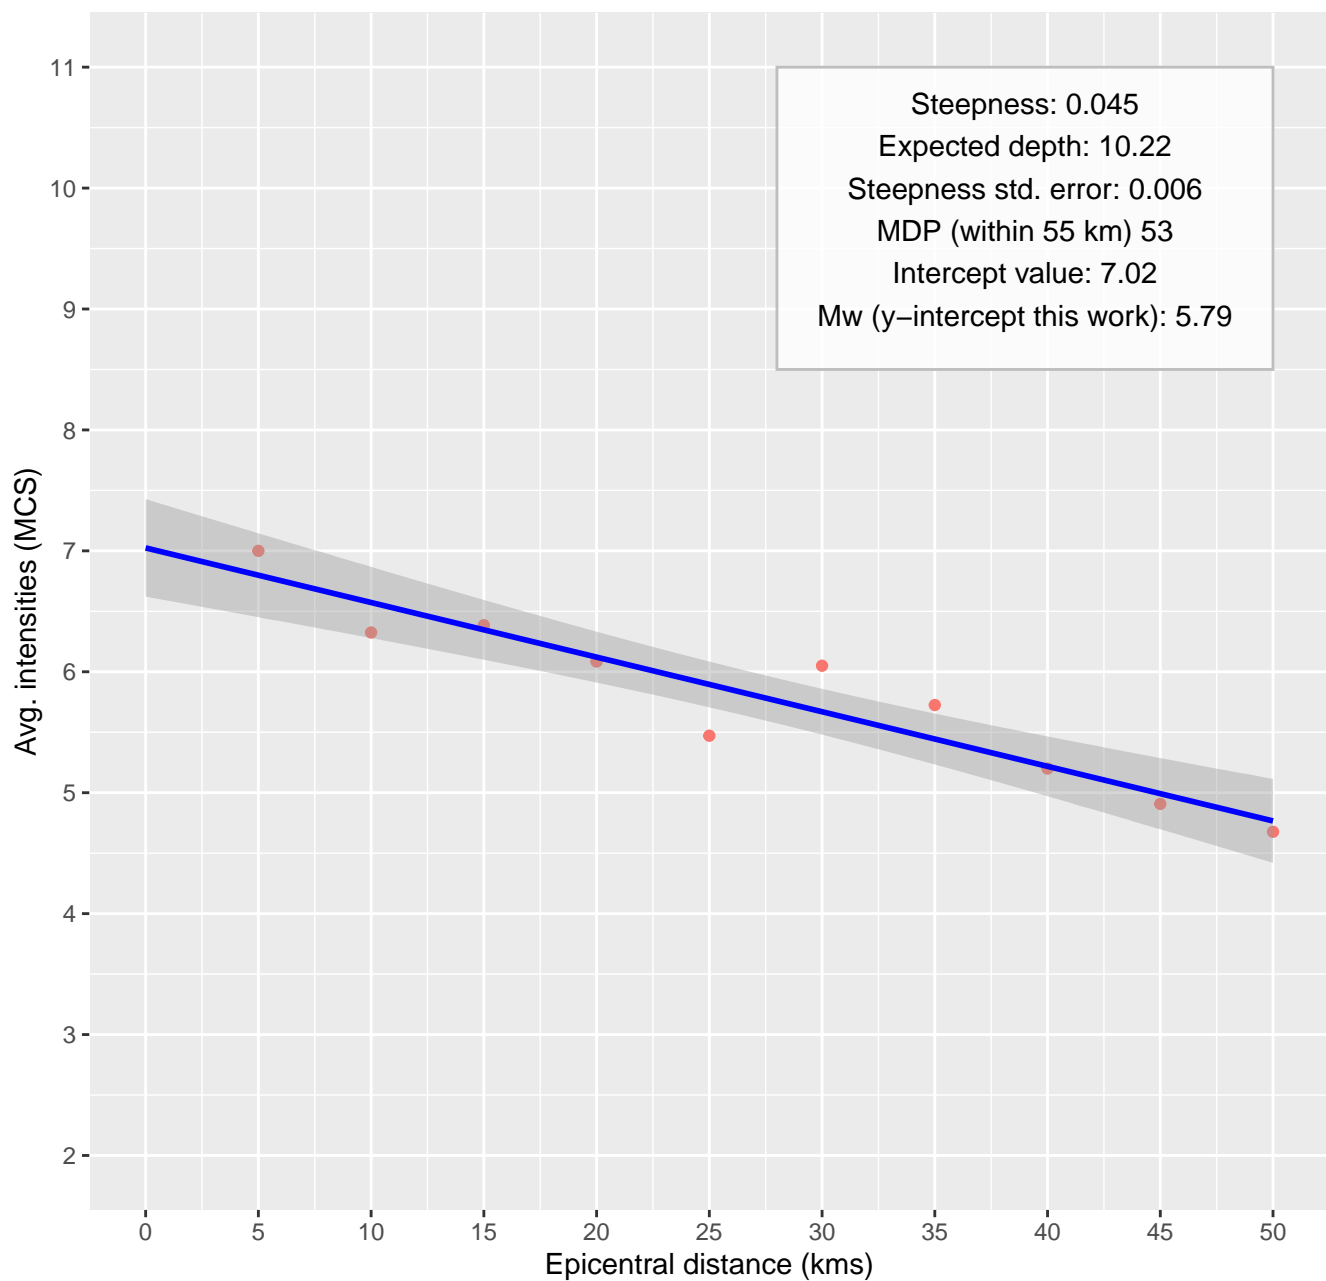

Supplement: Supplementary file 45 [file nhess-23-1007-2023-supplement.zip]

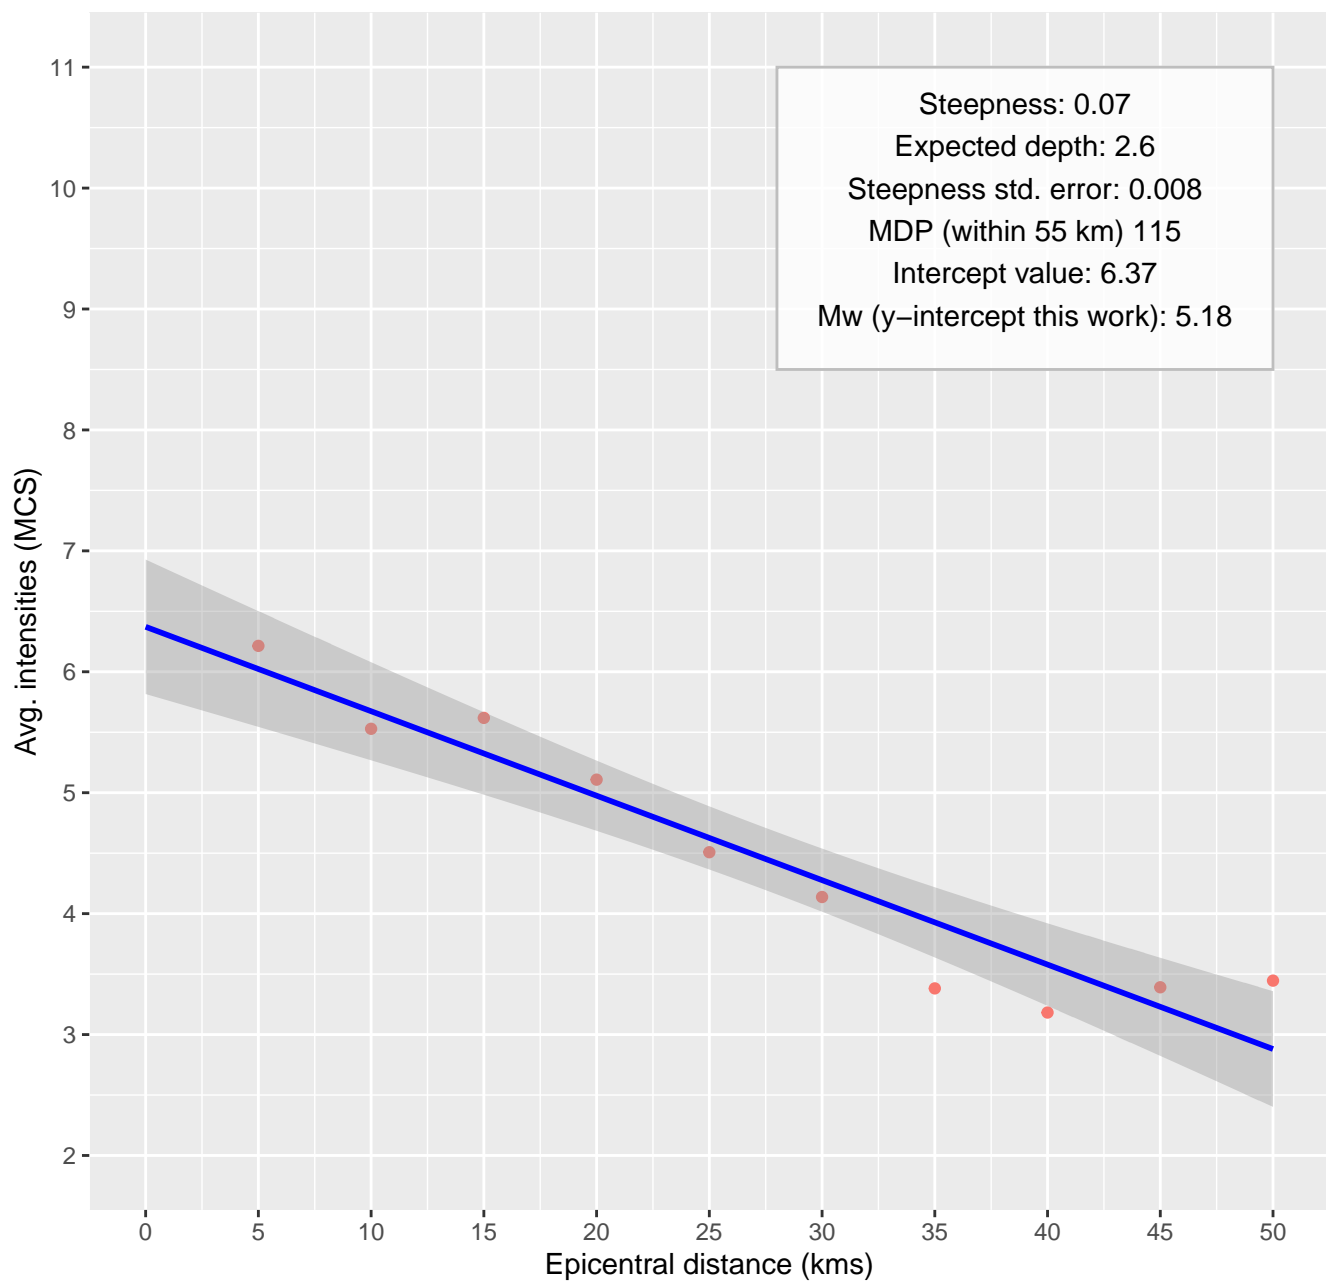

Supplement: Supplementary file 46 [file nhess-23-1007-2023-supplement.zip]

# DBMI\_ 19801123\_1834\_000 | 1980-11-23 – Irpinia–Basilicata

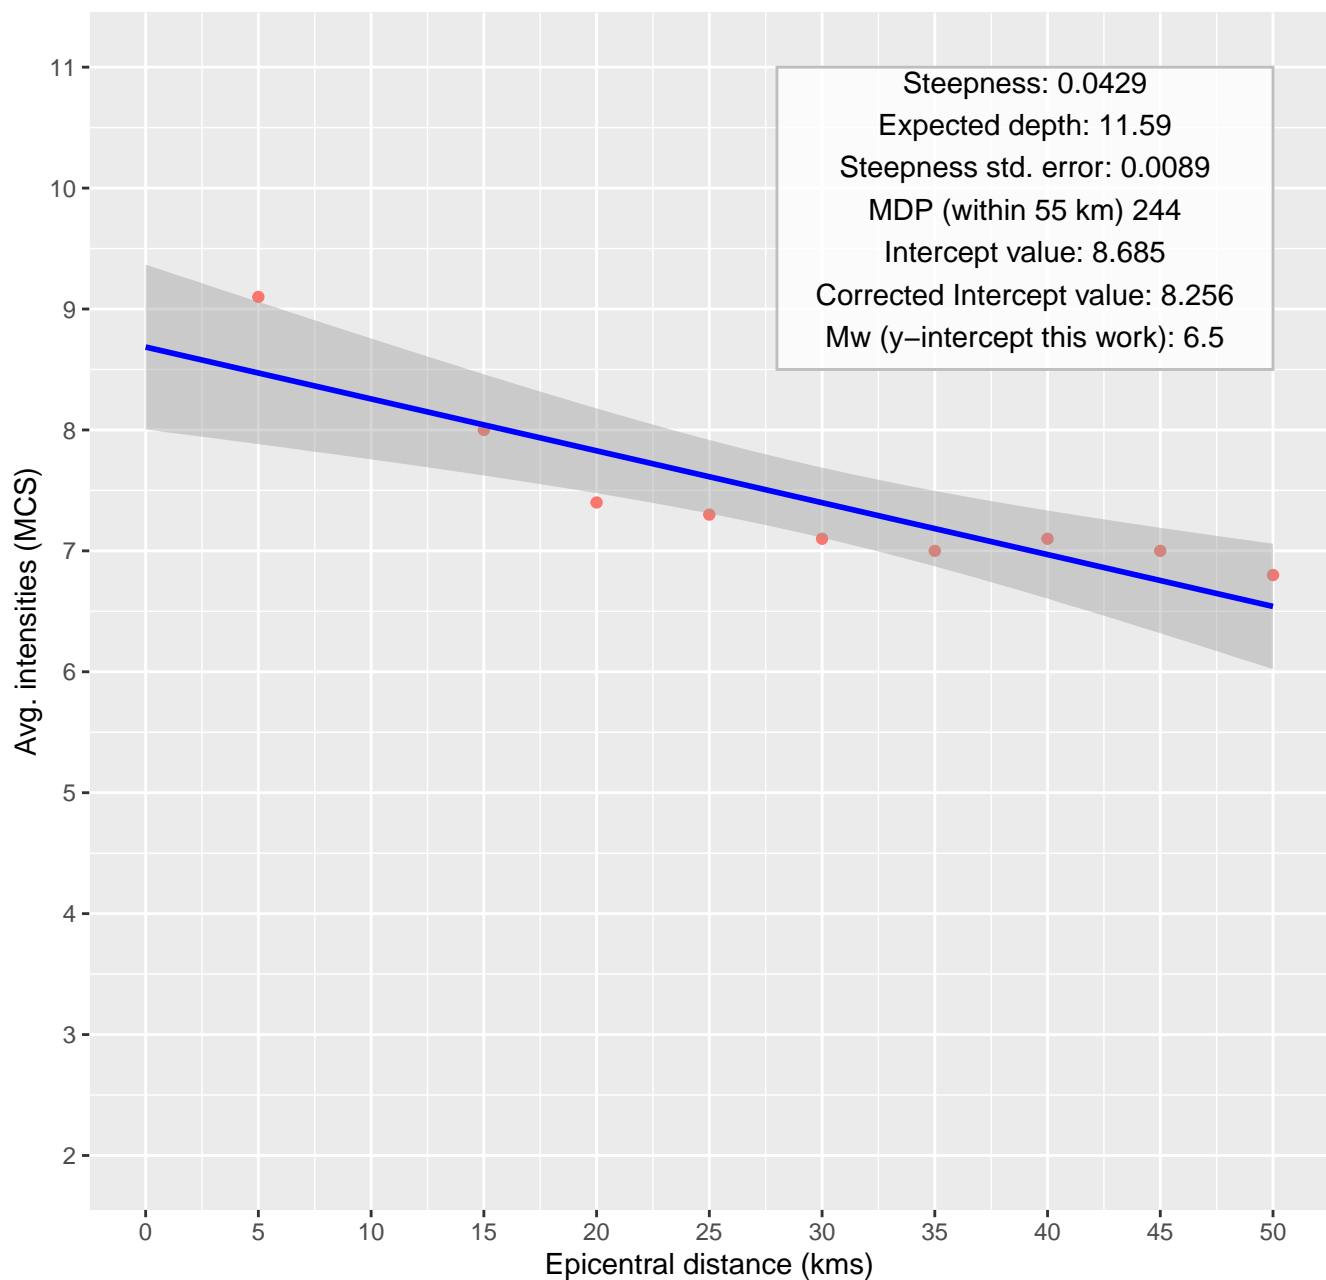

Supplement: Supplementary file 47 [file nhess-23-1007-2023-supplement.zip]

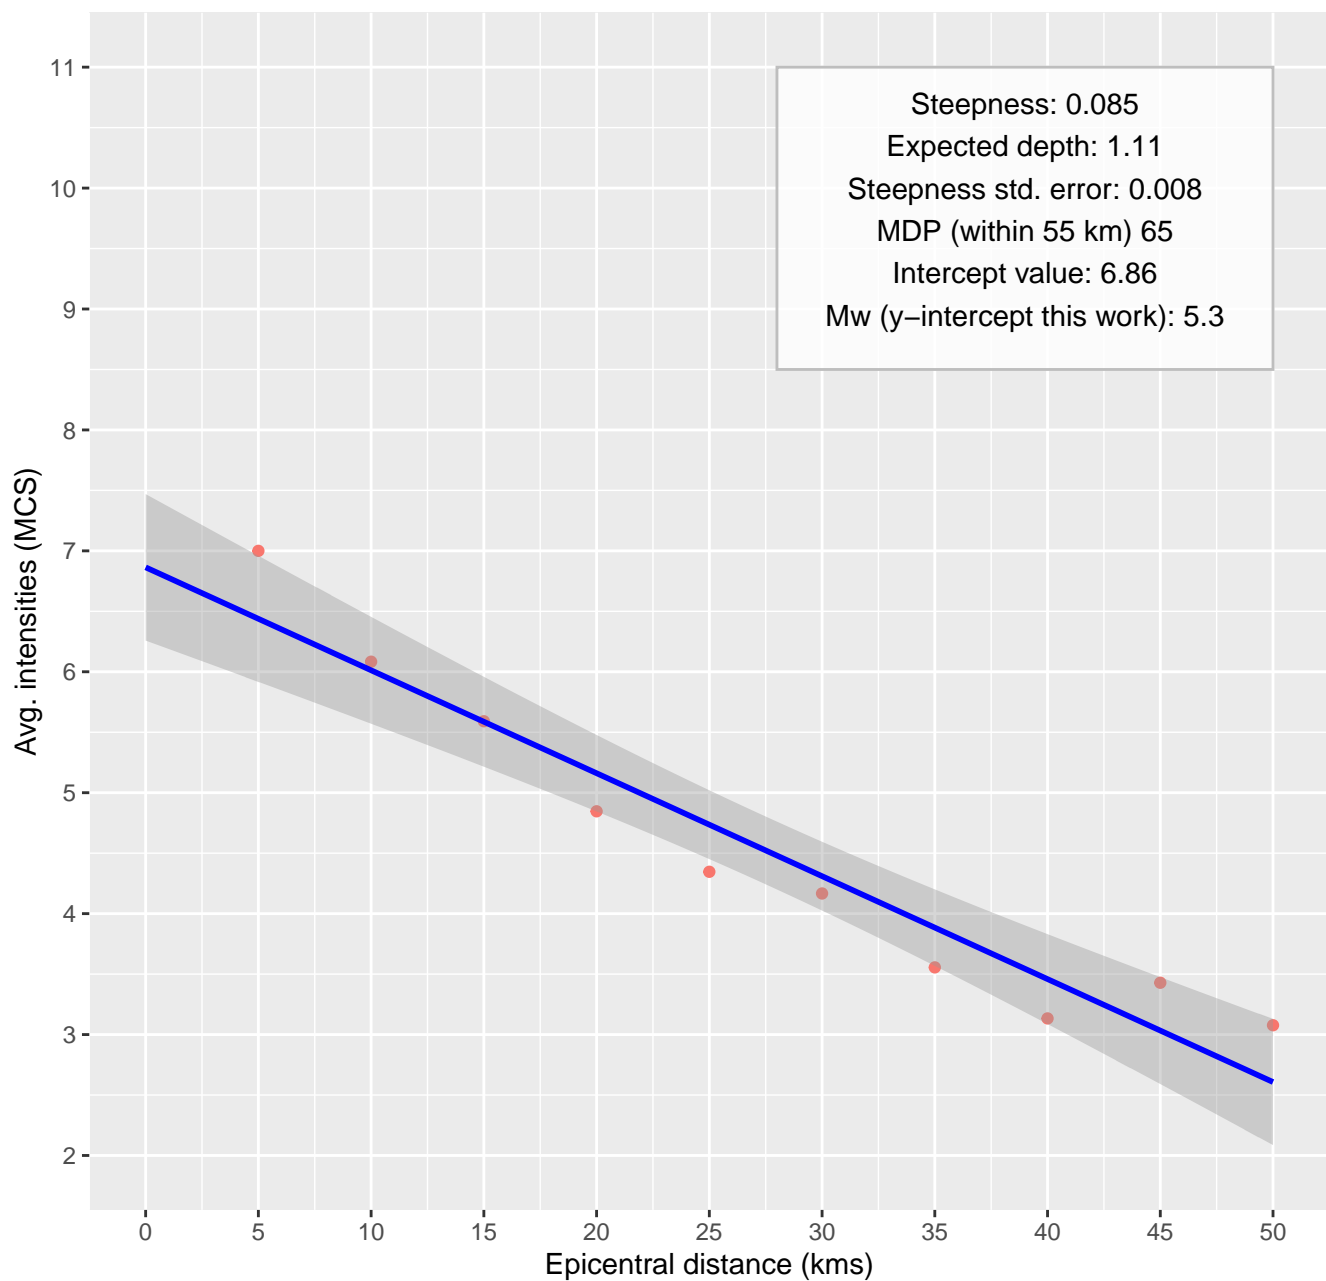

Supplement: Supplementary file 48 [file nhess-23-1007-2023-supplement.zip]

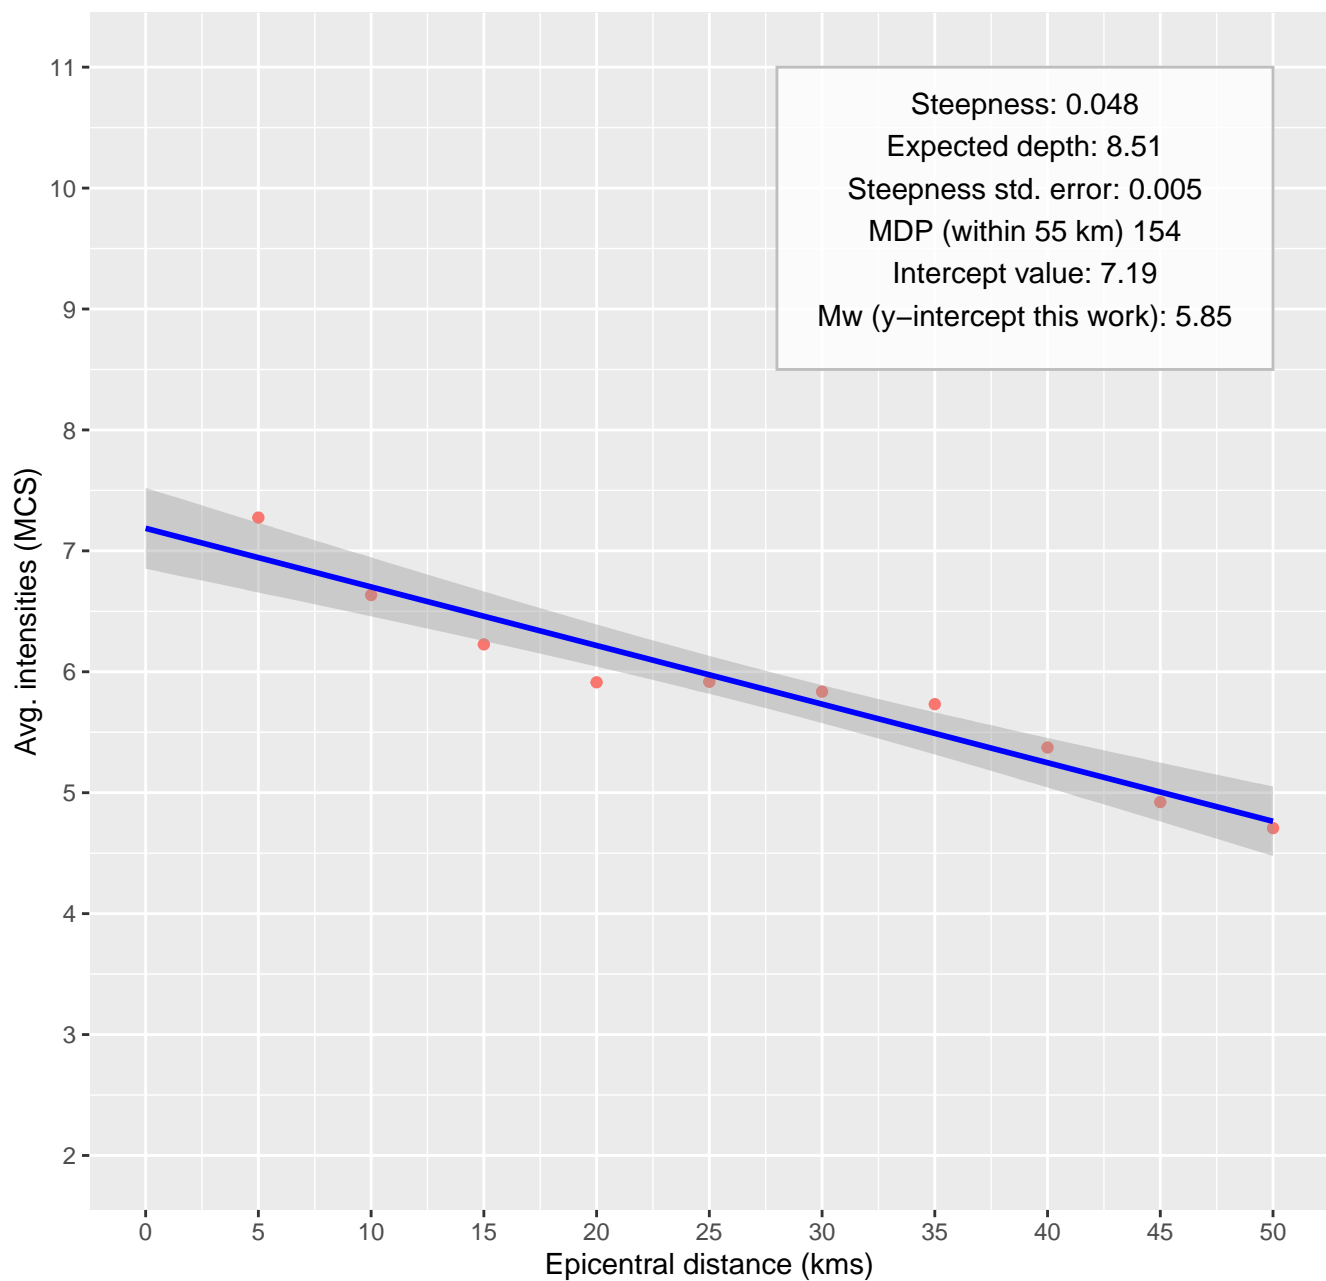

Supplement: Supplementary file 49 [file nhess-23-1007-2023-supplement.zip]

# DBMI\_ 18910607\_0106\_000 | 1891-06-07 – Valle d'Illasi

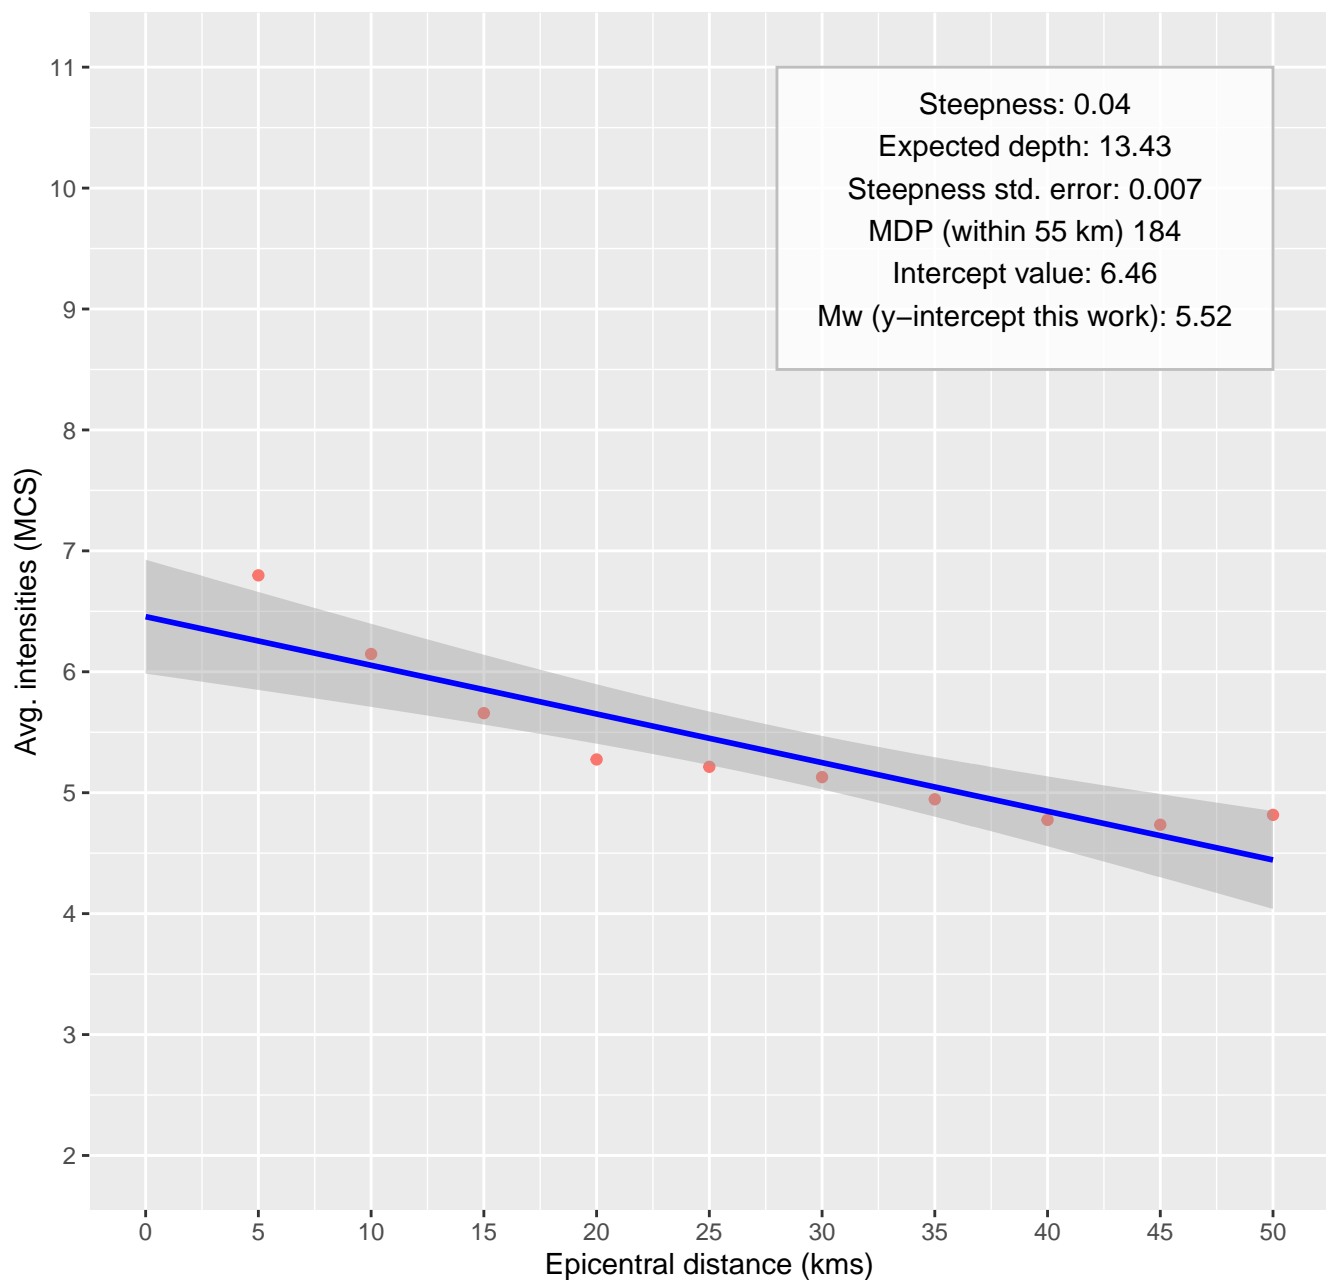

Supplement: Supplementary file 50 [file nhess-23-1007-2023-supplement.zip]

# DBMI\_ 19081210\_0620\_000 | 1908-12-10 – Monti Peloritani

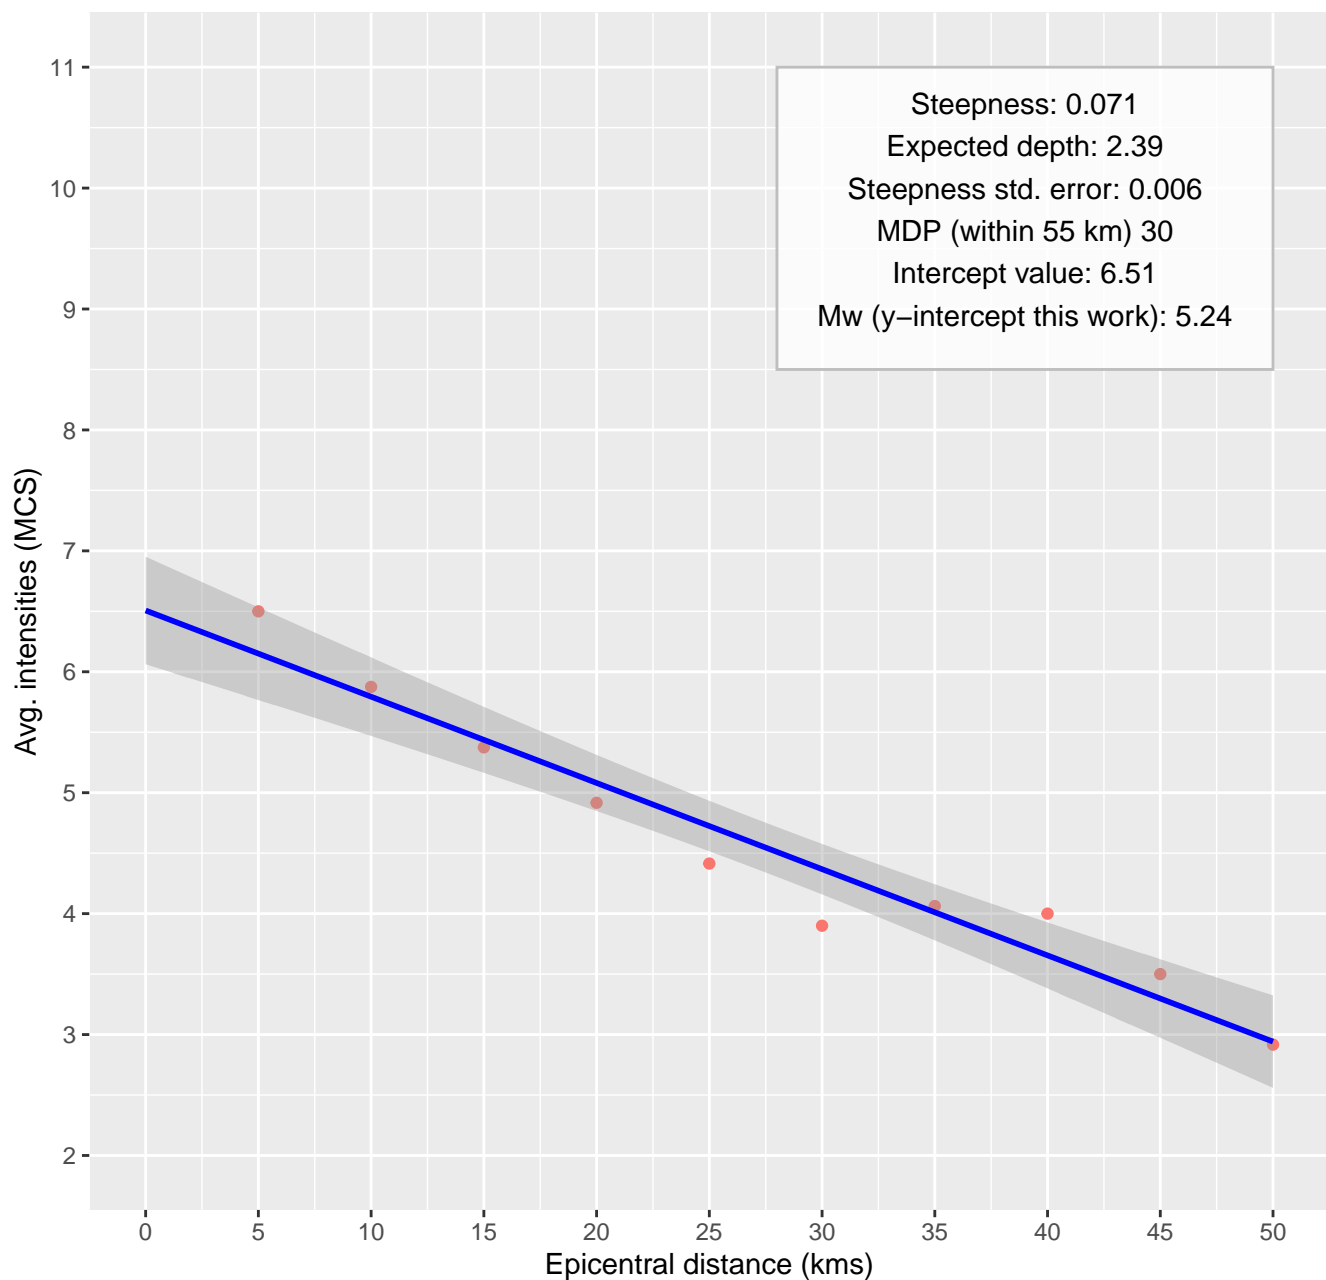

Supplement: Supplementary file 51 [file nhess-23-1007-2023-supplement.zip]

# DBMI\_ 18920809\_0758\_000 | 1892-08-09 – Valle d'Alpone

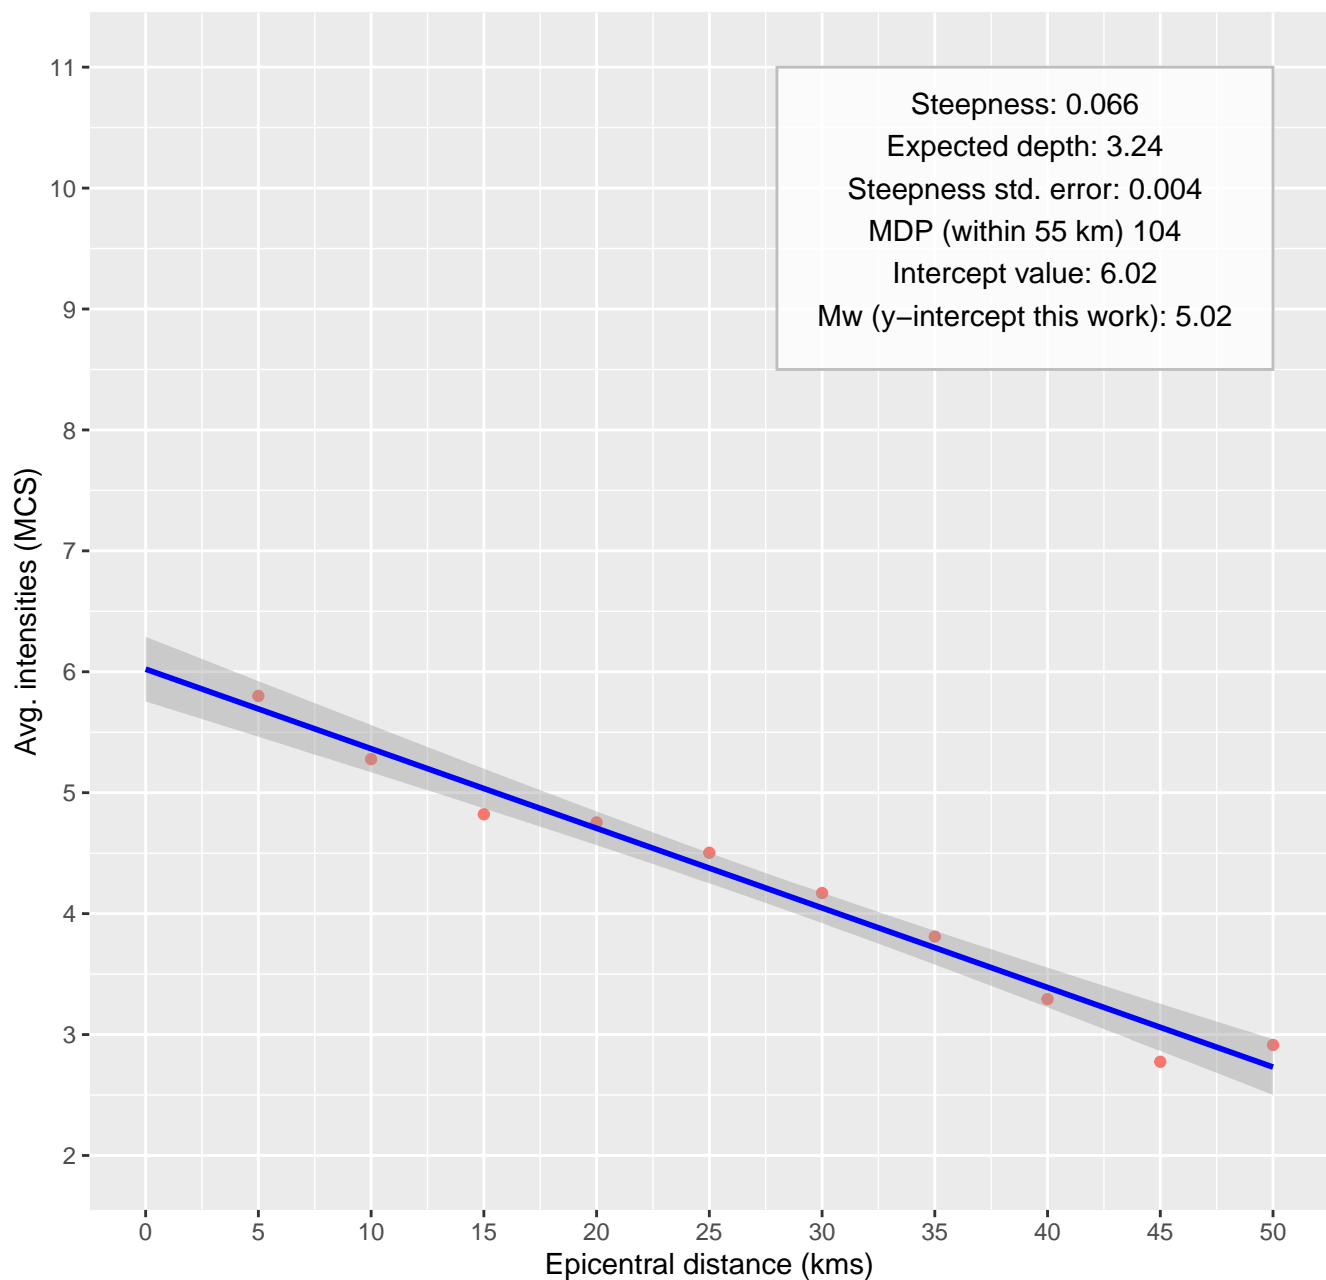

Supplement: Supplementary file 52 [file nhess-23-1007-2023-supplement.zip]

# DBMI\_ 18950201\_0724\_000 | 1895-02-01 – Monti del Partenio

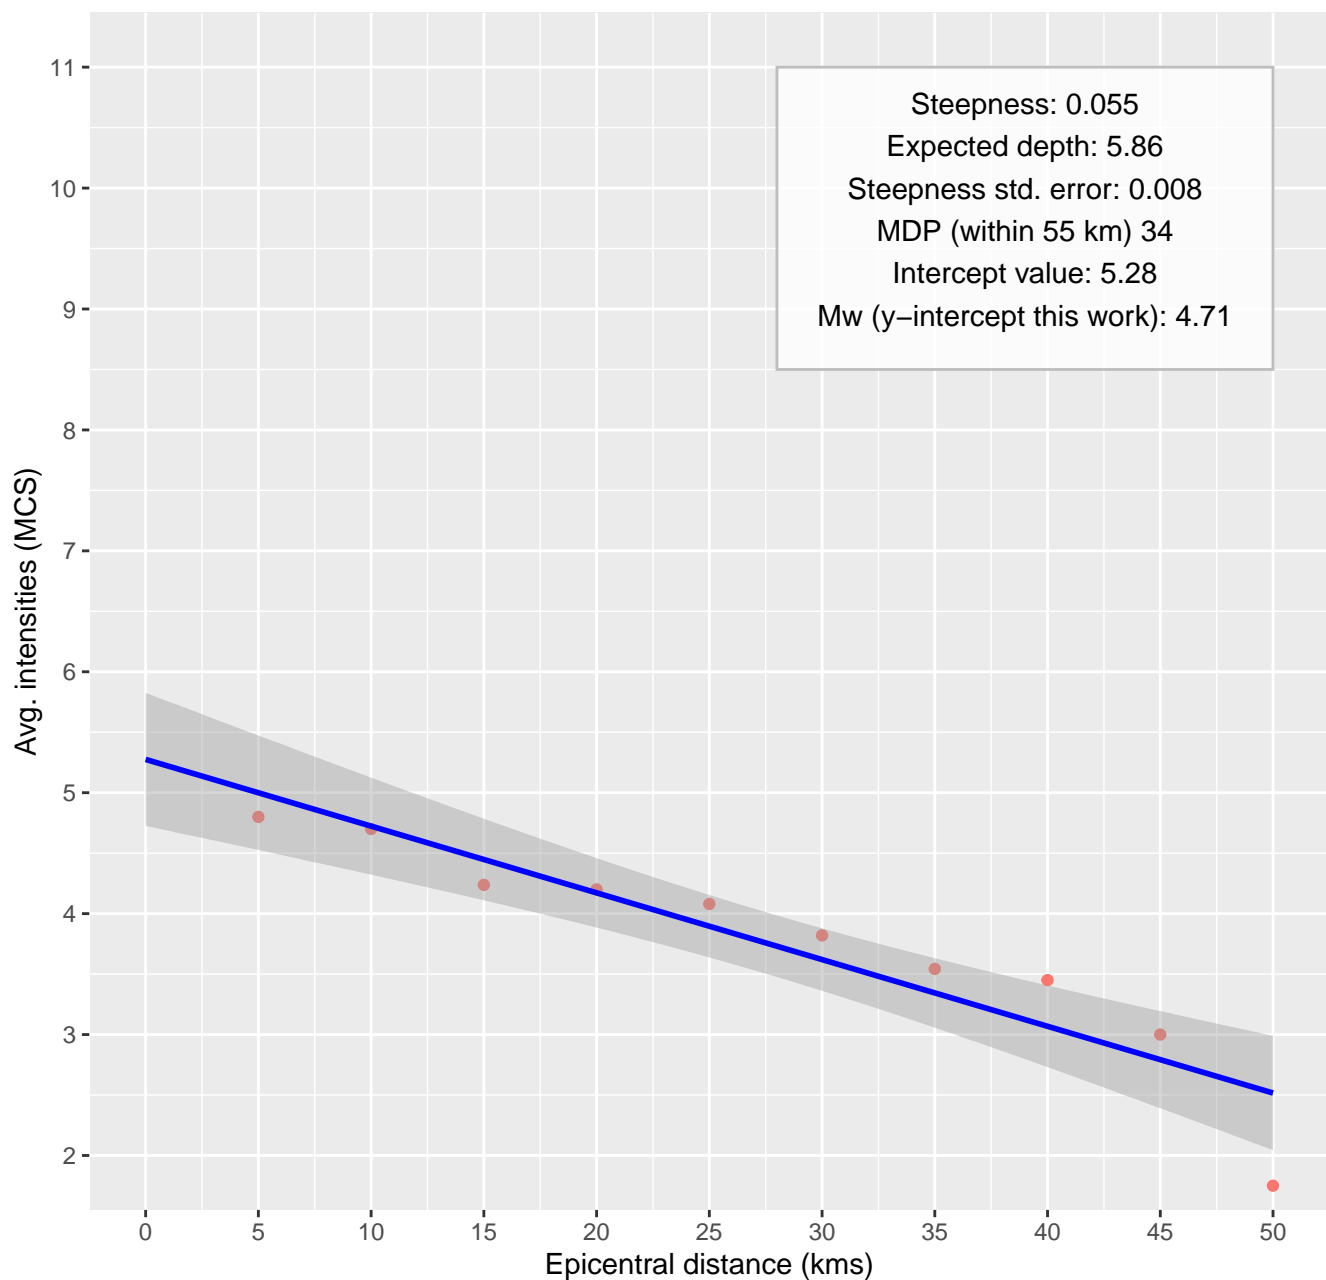

Supplement: Supplementary file 53 [file nhess-23-1007-2023-supplement.zip]

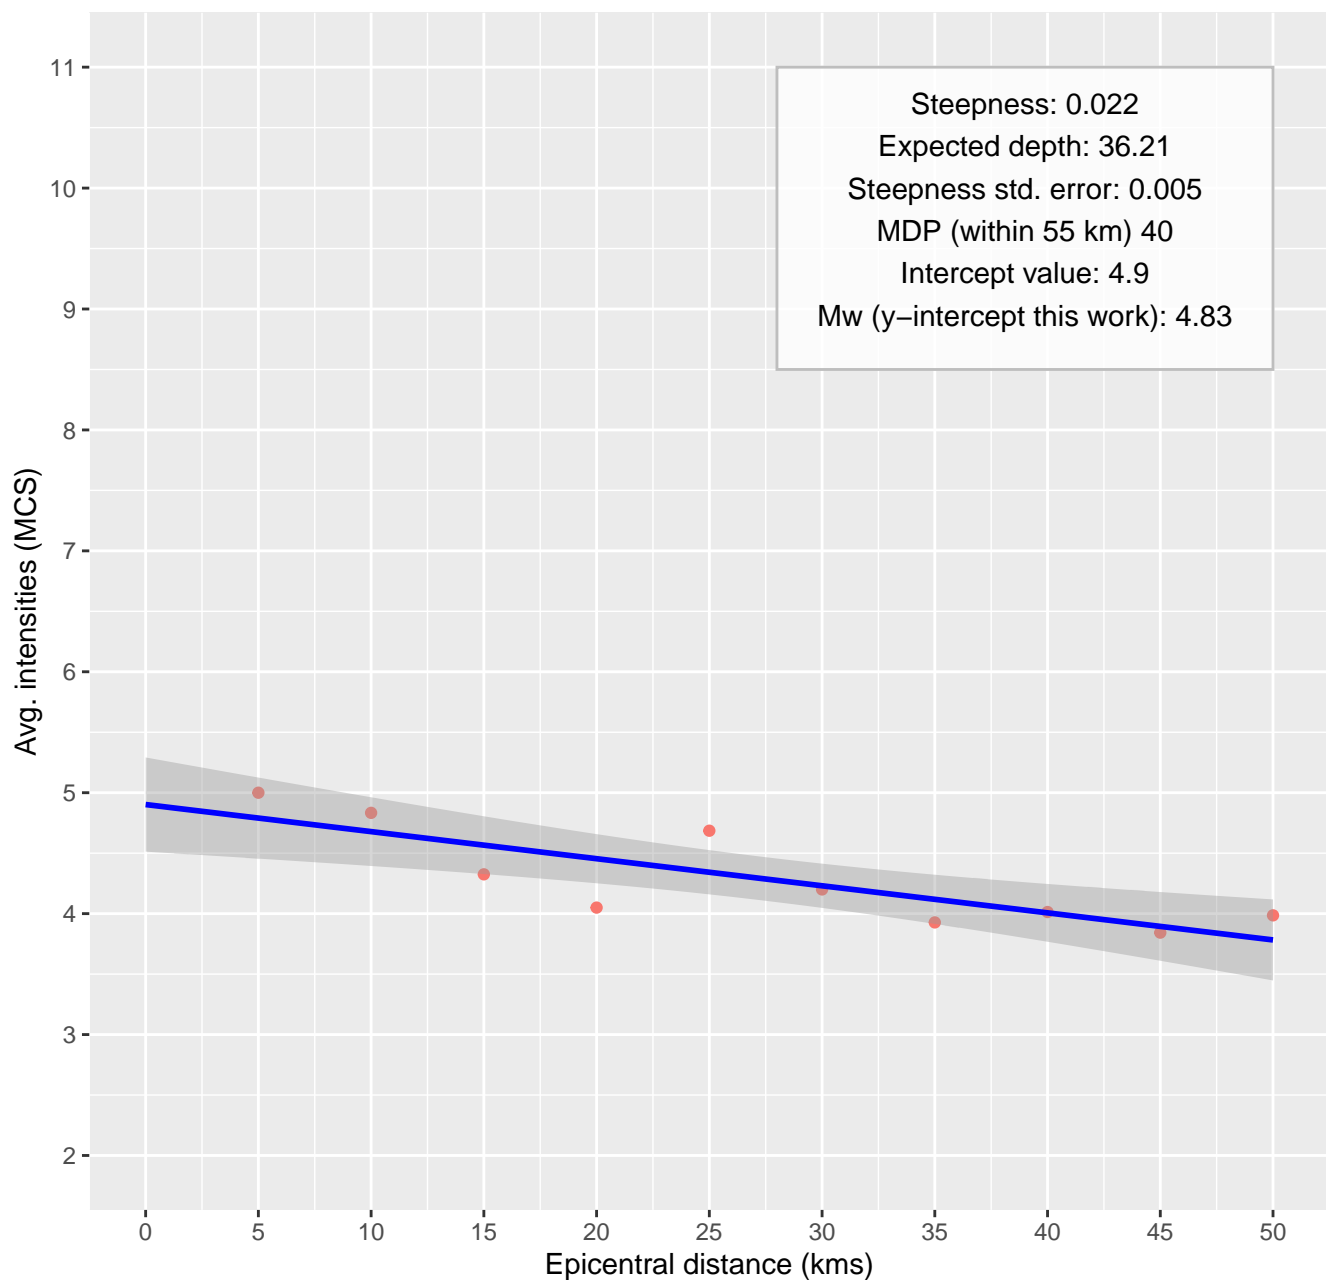

Supplement: Supplementary file 54 [file nhess-23-1007-2023-supplement.zip]

# DBMI\_ 18571216\_2115\_001 | 1857-12-16 – Basilicata

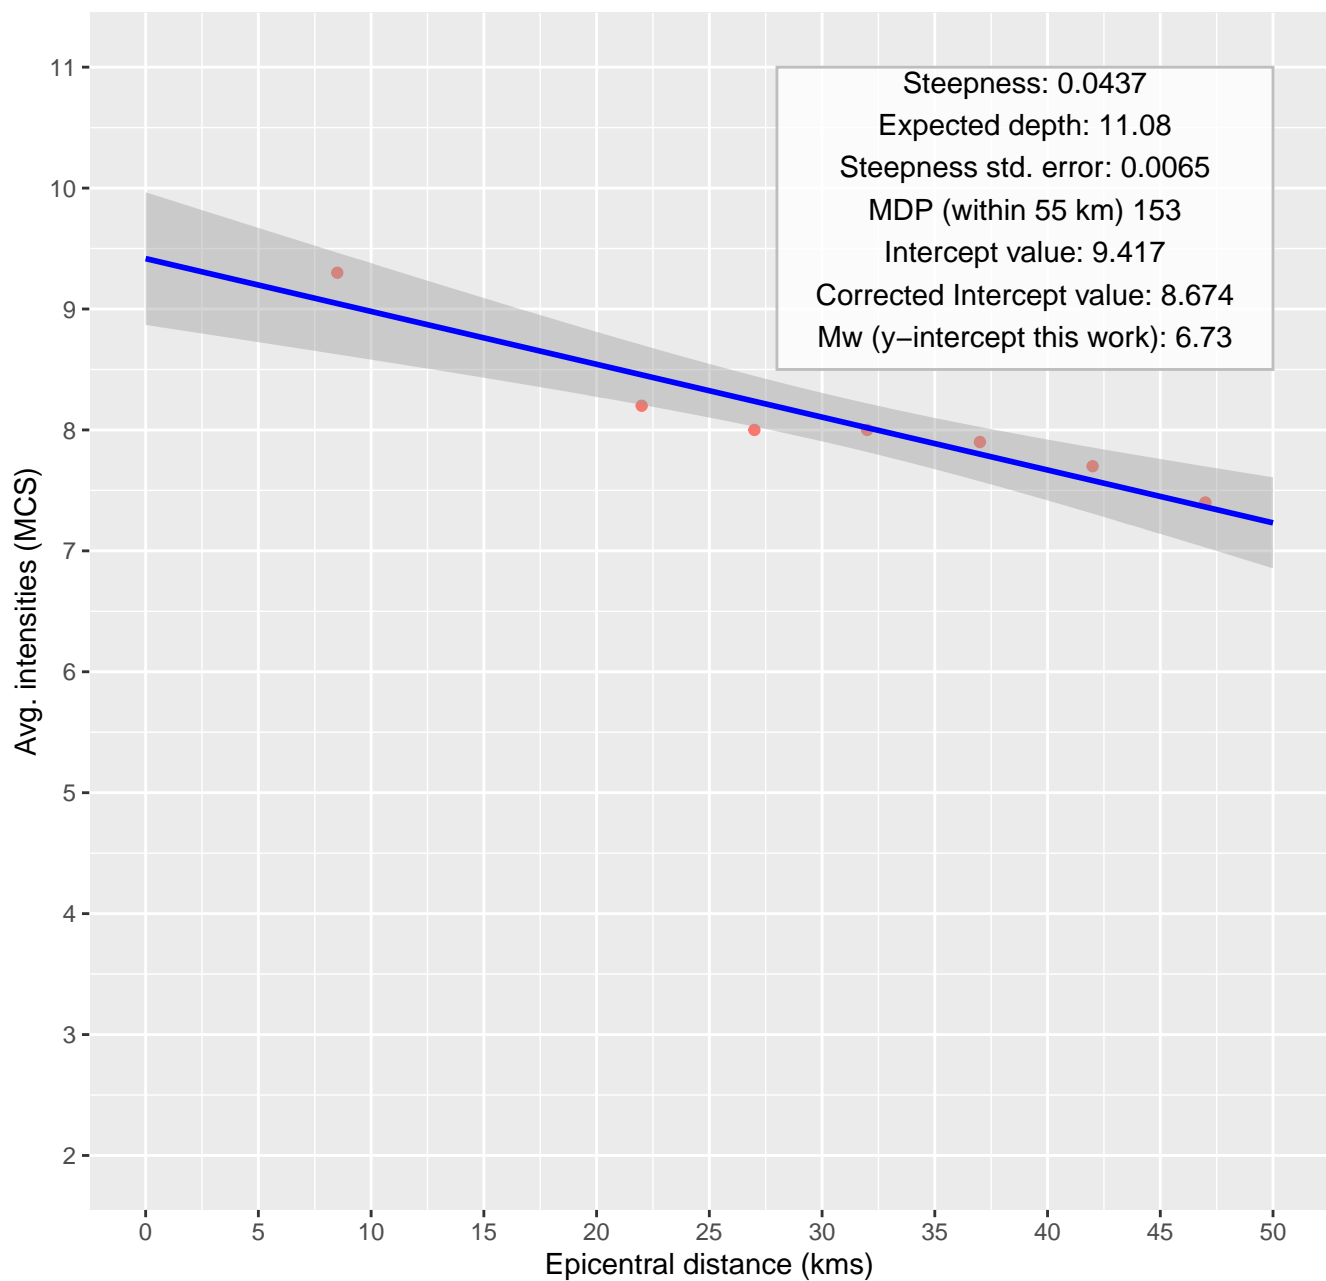

Supplement: Supplementary file 55 [file nhess-23-1007-2023-supplement.zip]

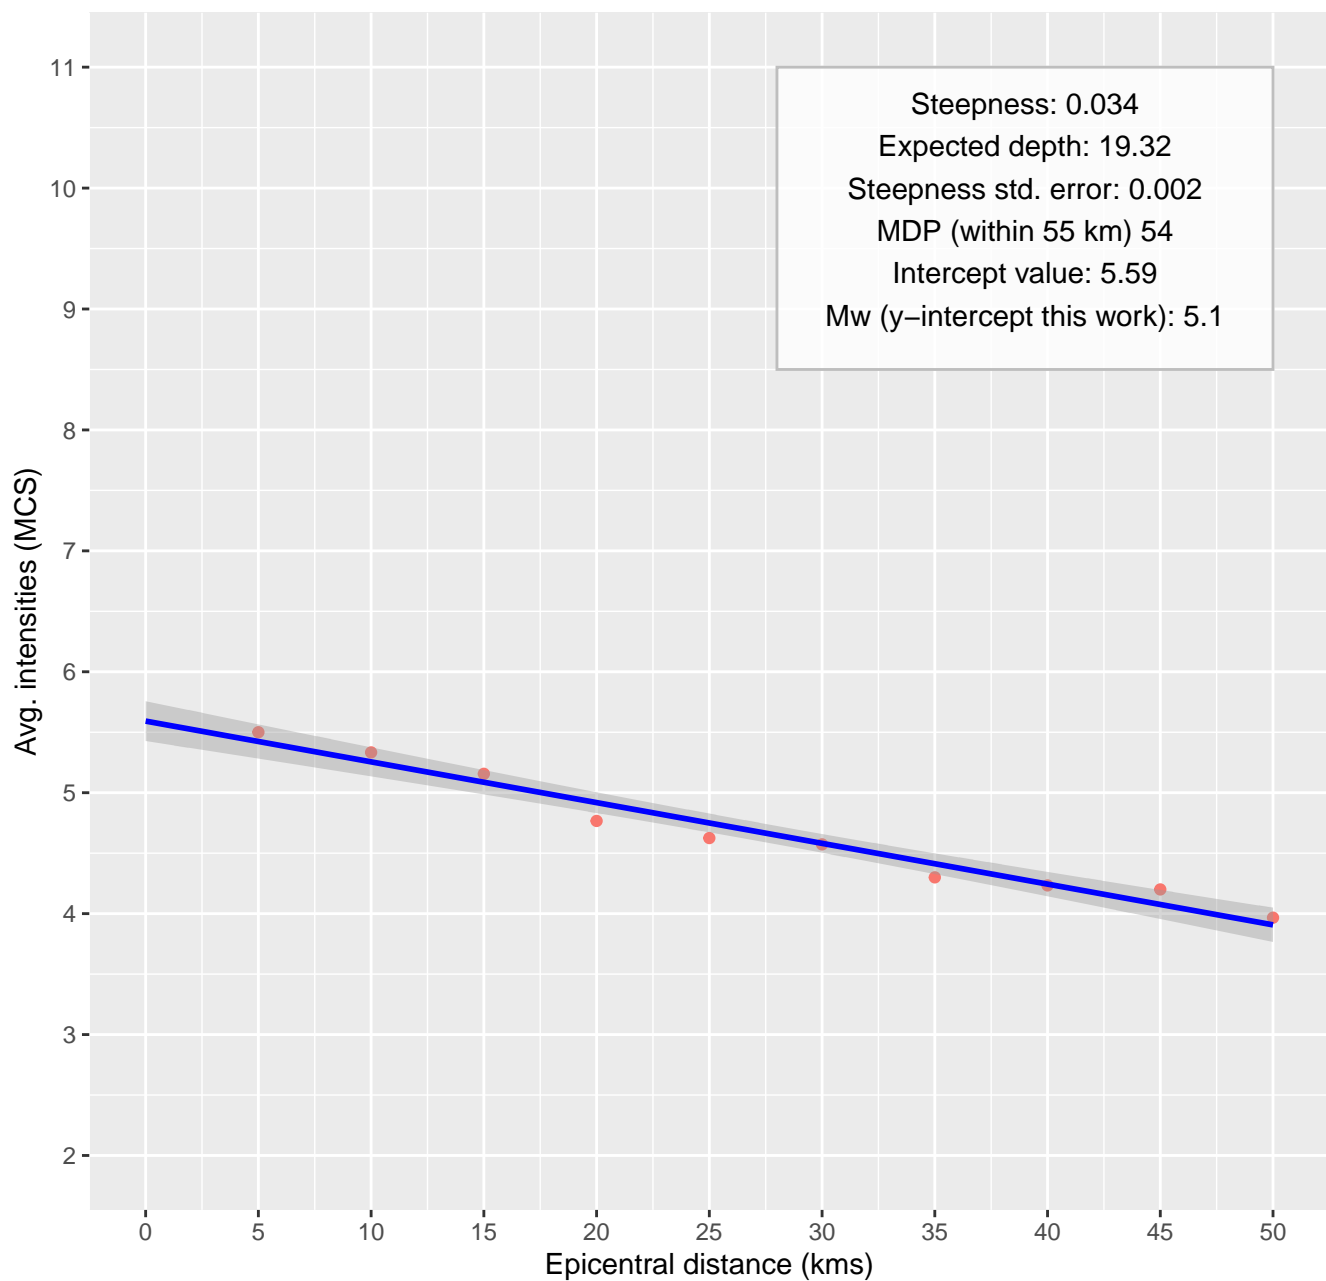

Supplement: Supplementary file 56 [file nhess-23-1007-2023-supplement.zip]

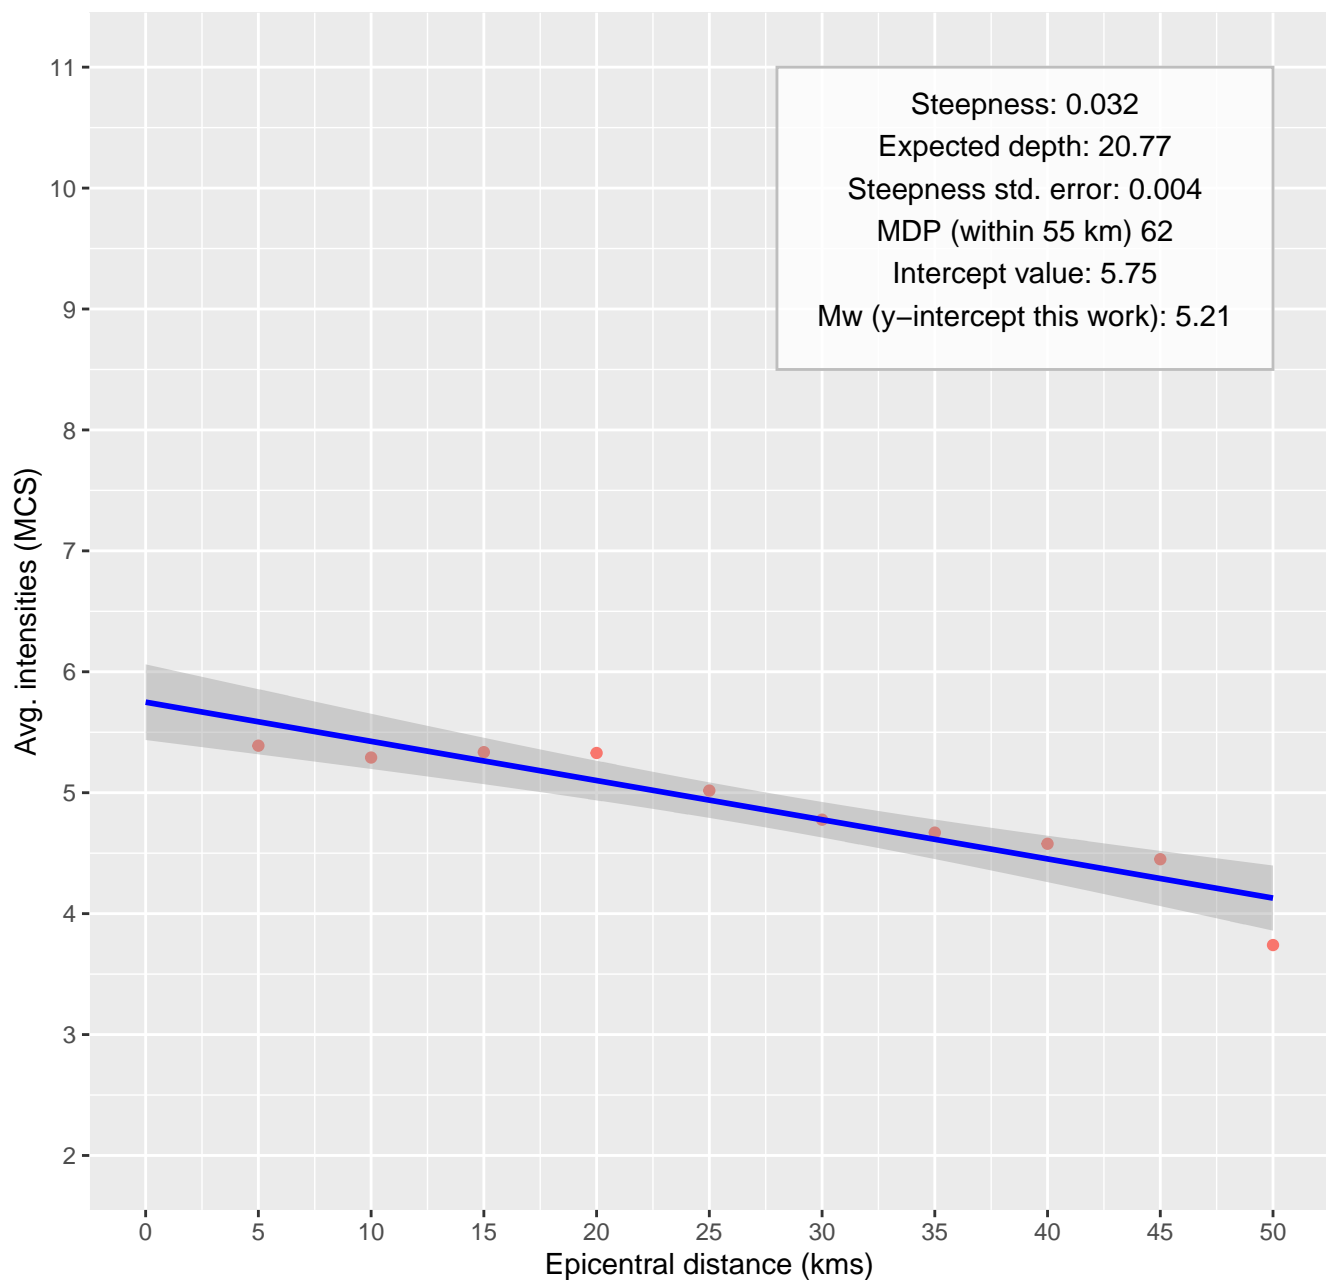

Supplement: Supplementary file 57 [file nhess-23-1007-2023-supplement.zip]

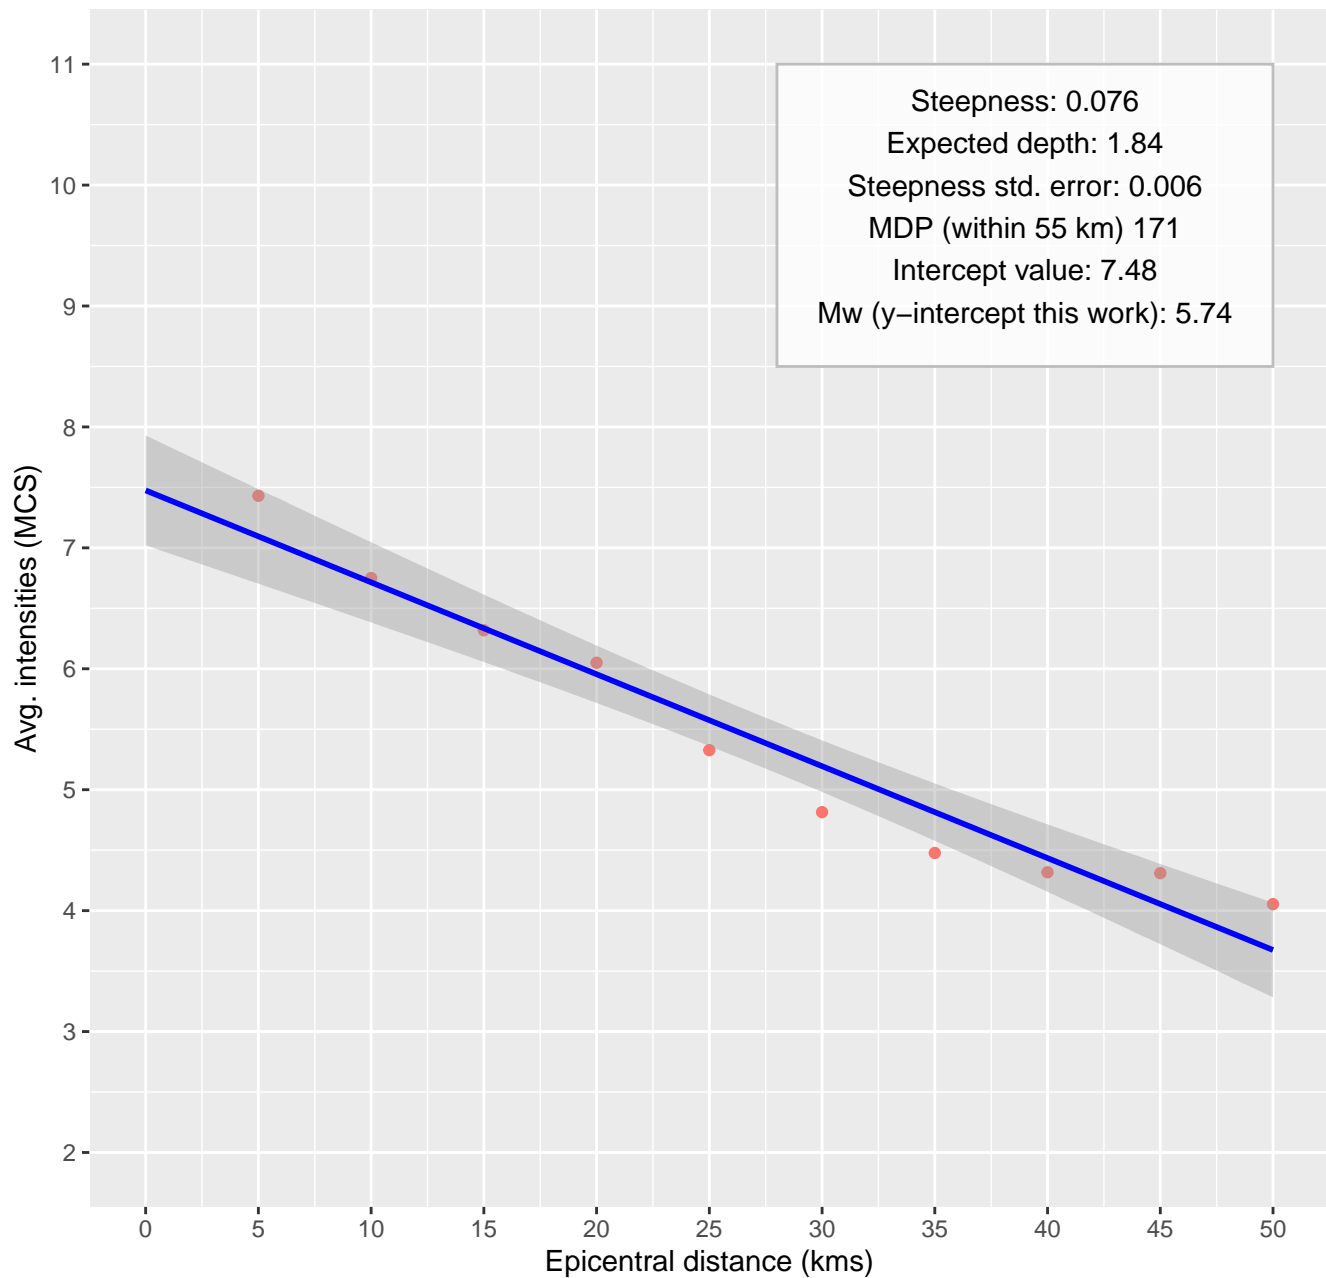

Supplement: Supplementary file 58 [file nhess-23-1007-2023-supplement.zip]

# DBMI\_ 18990719\_1318\_000 | 1899-07-19 – Colli Albani

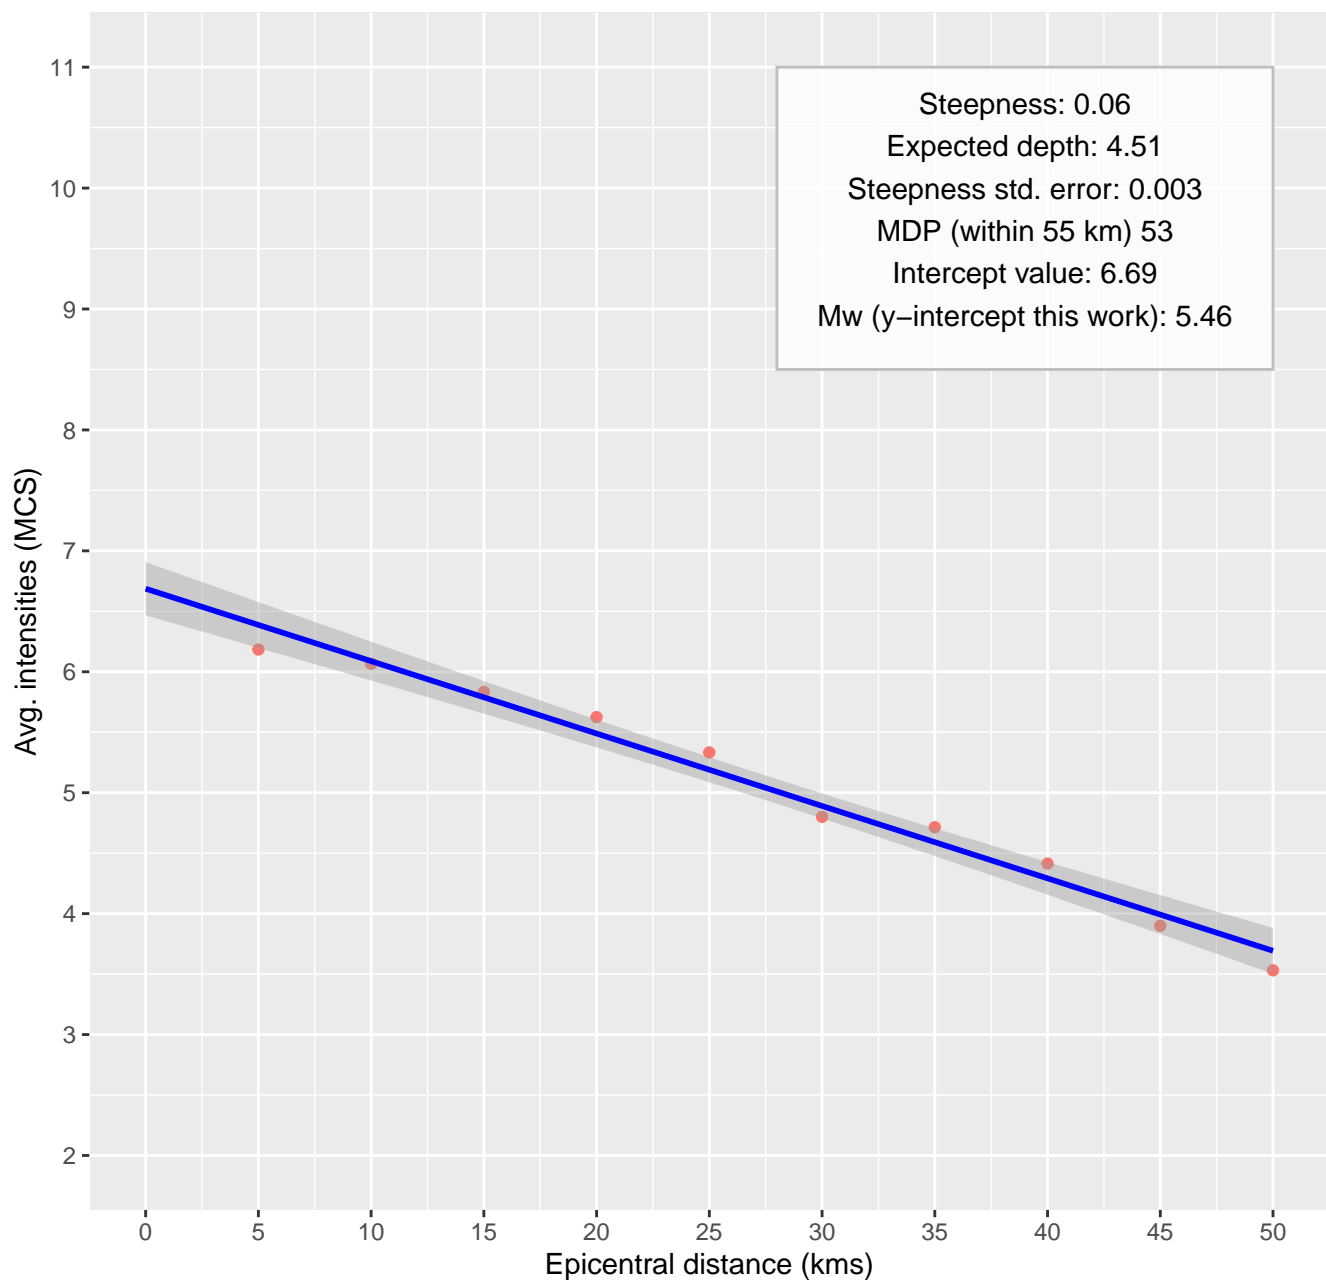

Supplement: Supplementary file 59 [file nhess-23-1007-2023-supplement.zip]

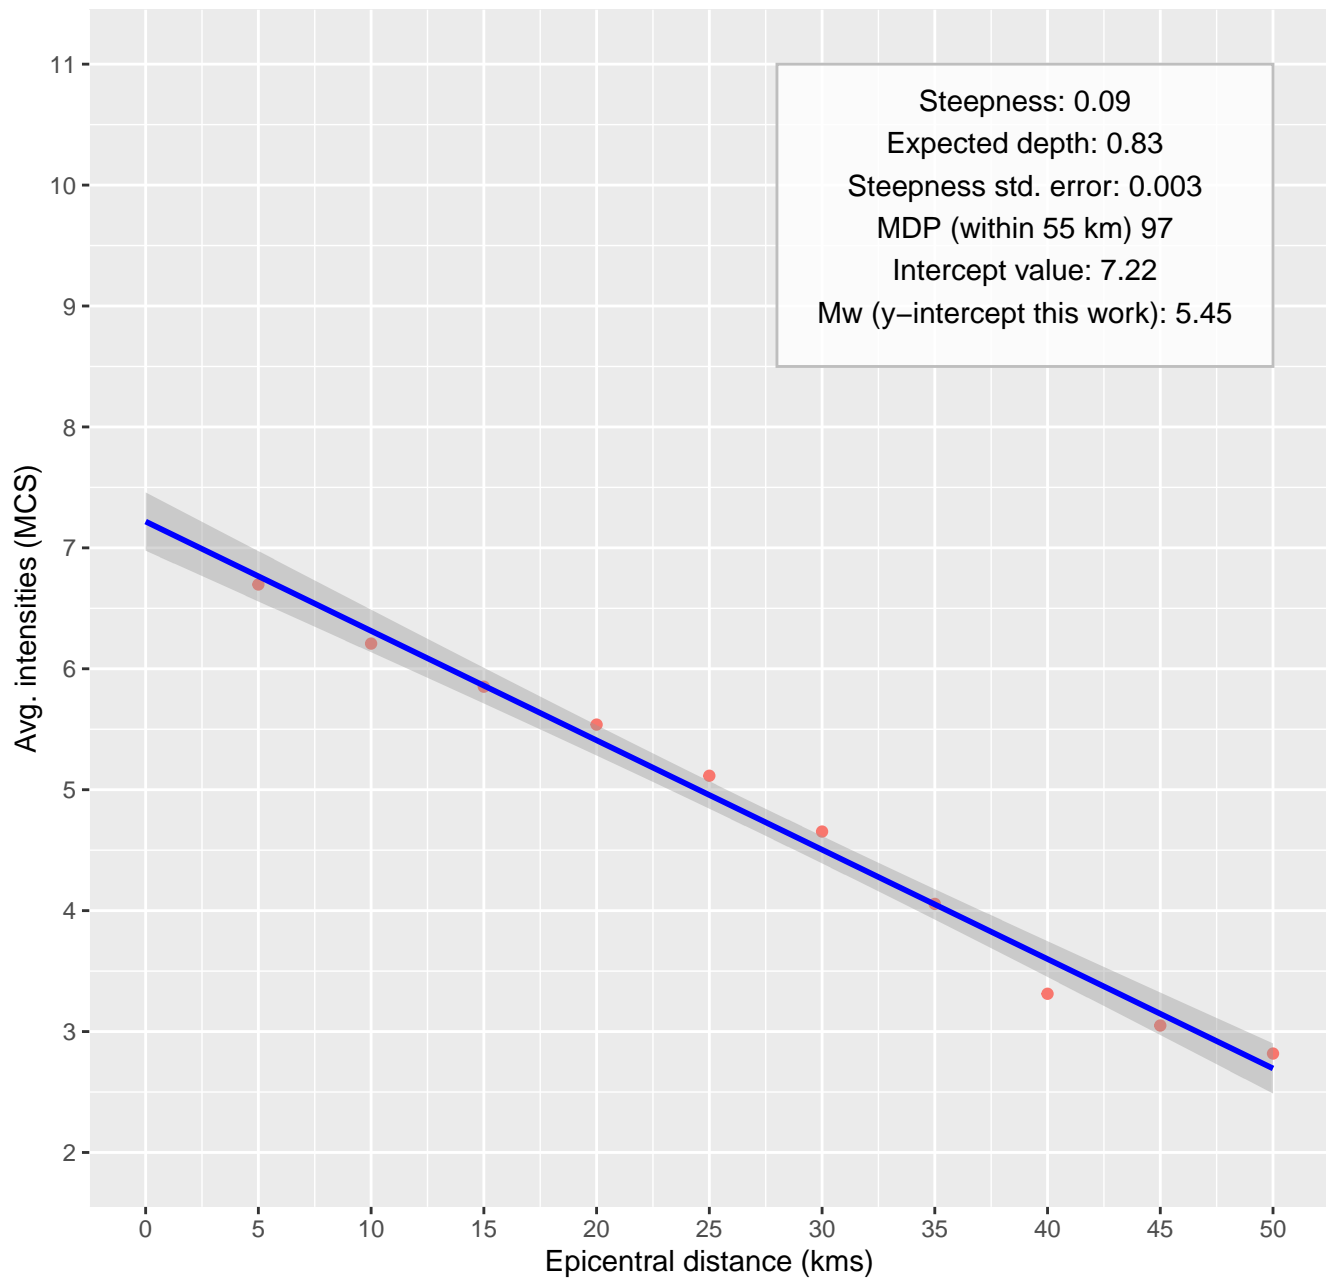

Supplement: Supplementary file 60 [file nhess-23-1007-2023-supplement.zip]

# DBMI\_ 19290718\_2102\_000 | 1929-07-18 – Mugello

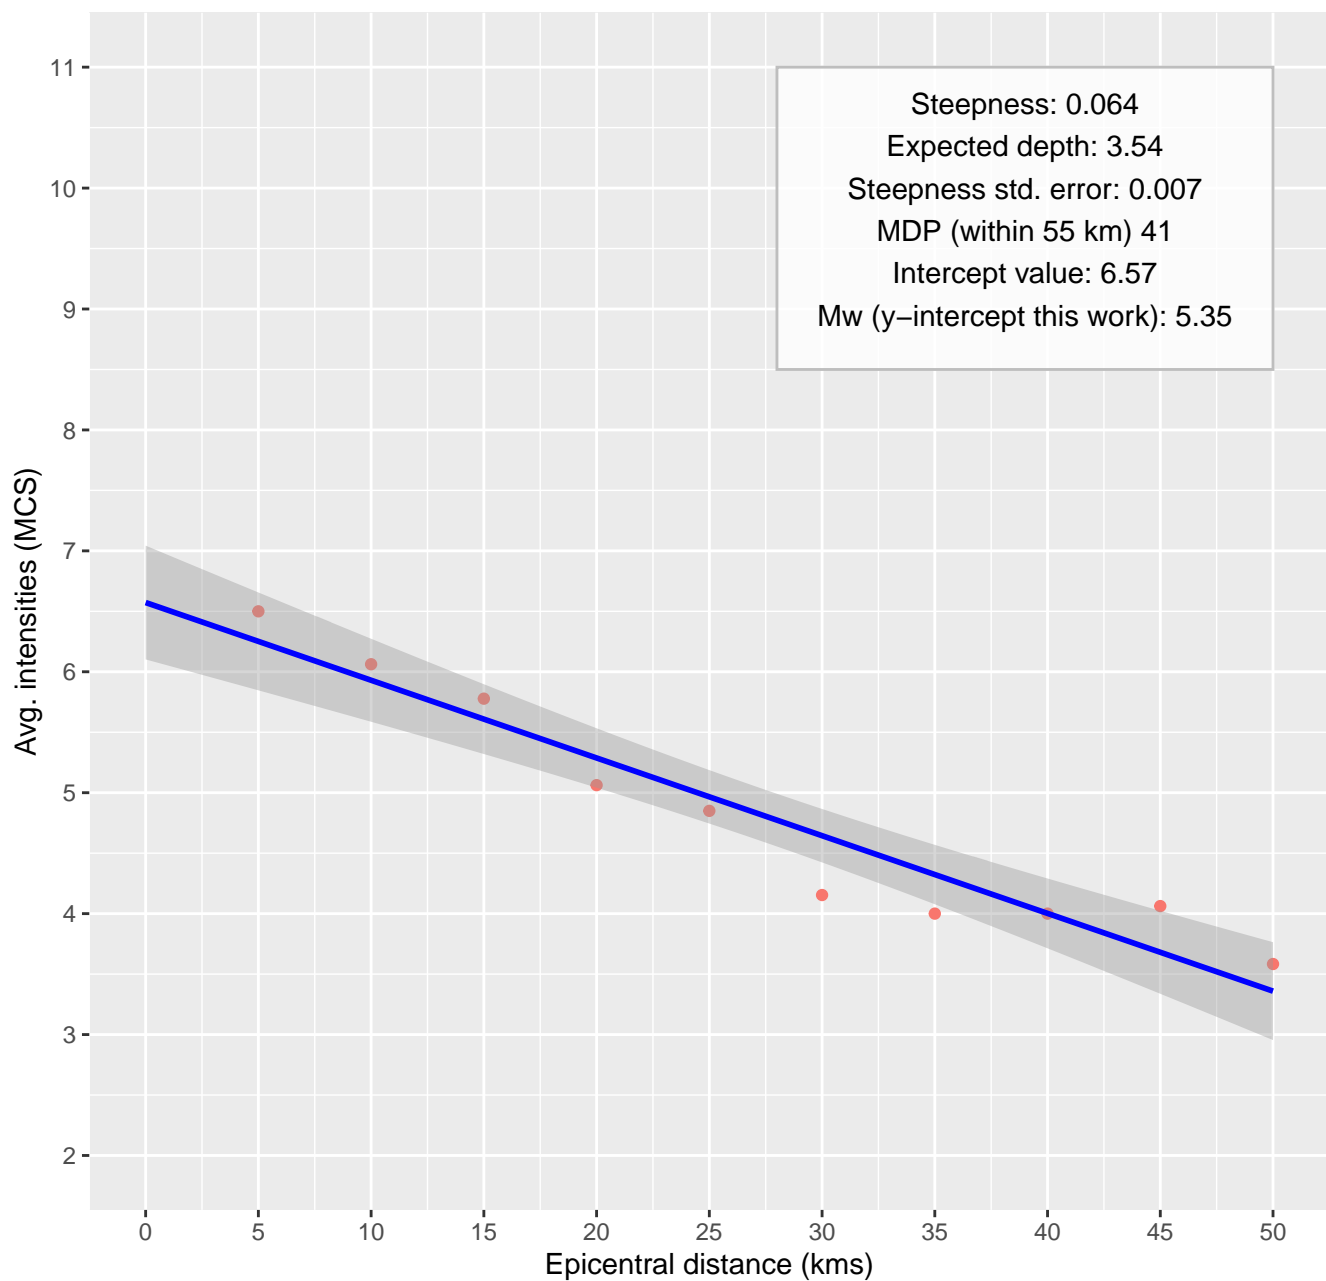

Supplement: Supplementary file 61 [file nhess-23-1007-2023-supplement.zip]

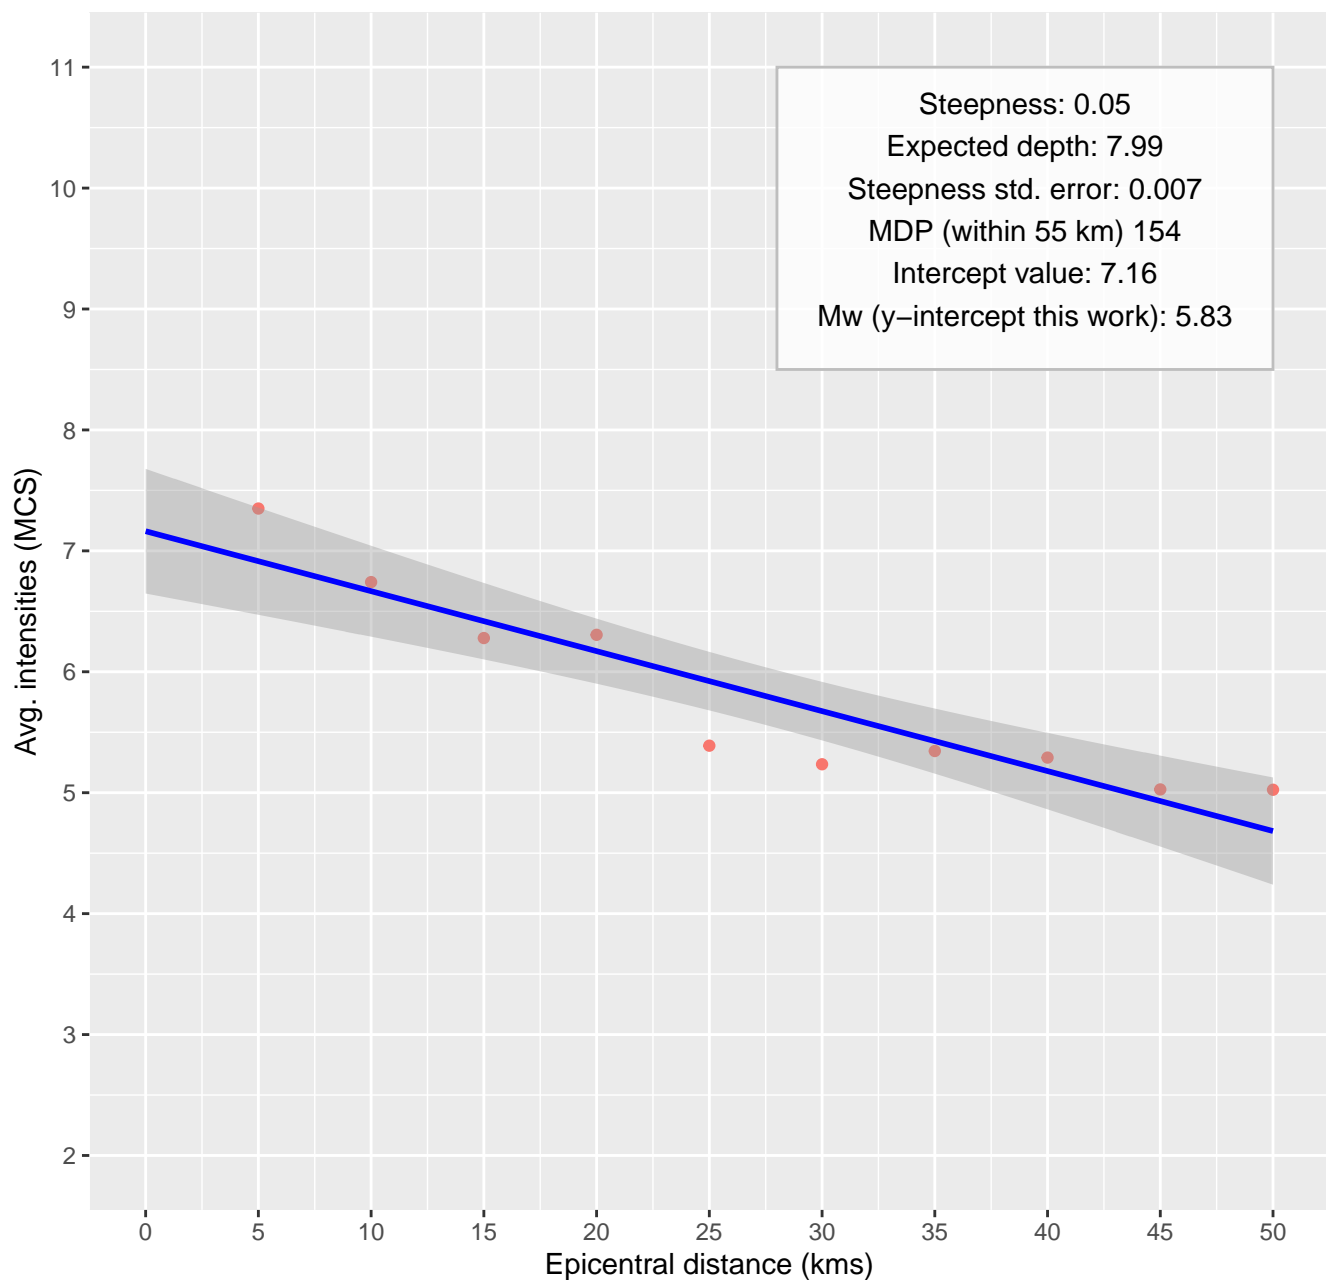

Supplement: Supplementary file 62 [file nhess-23-1007-2023-supplement.zip]

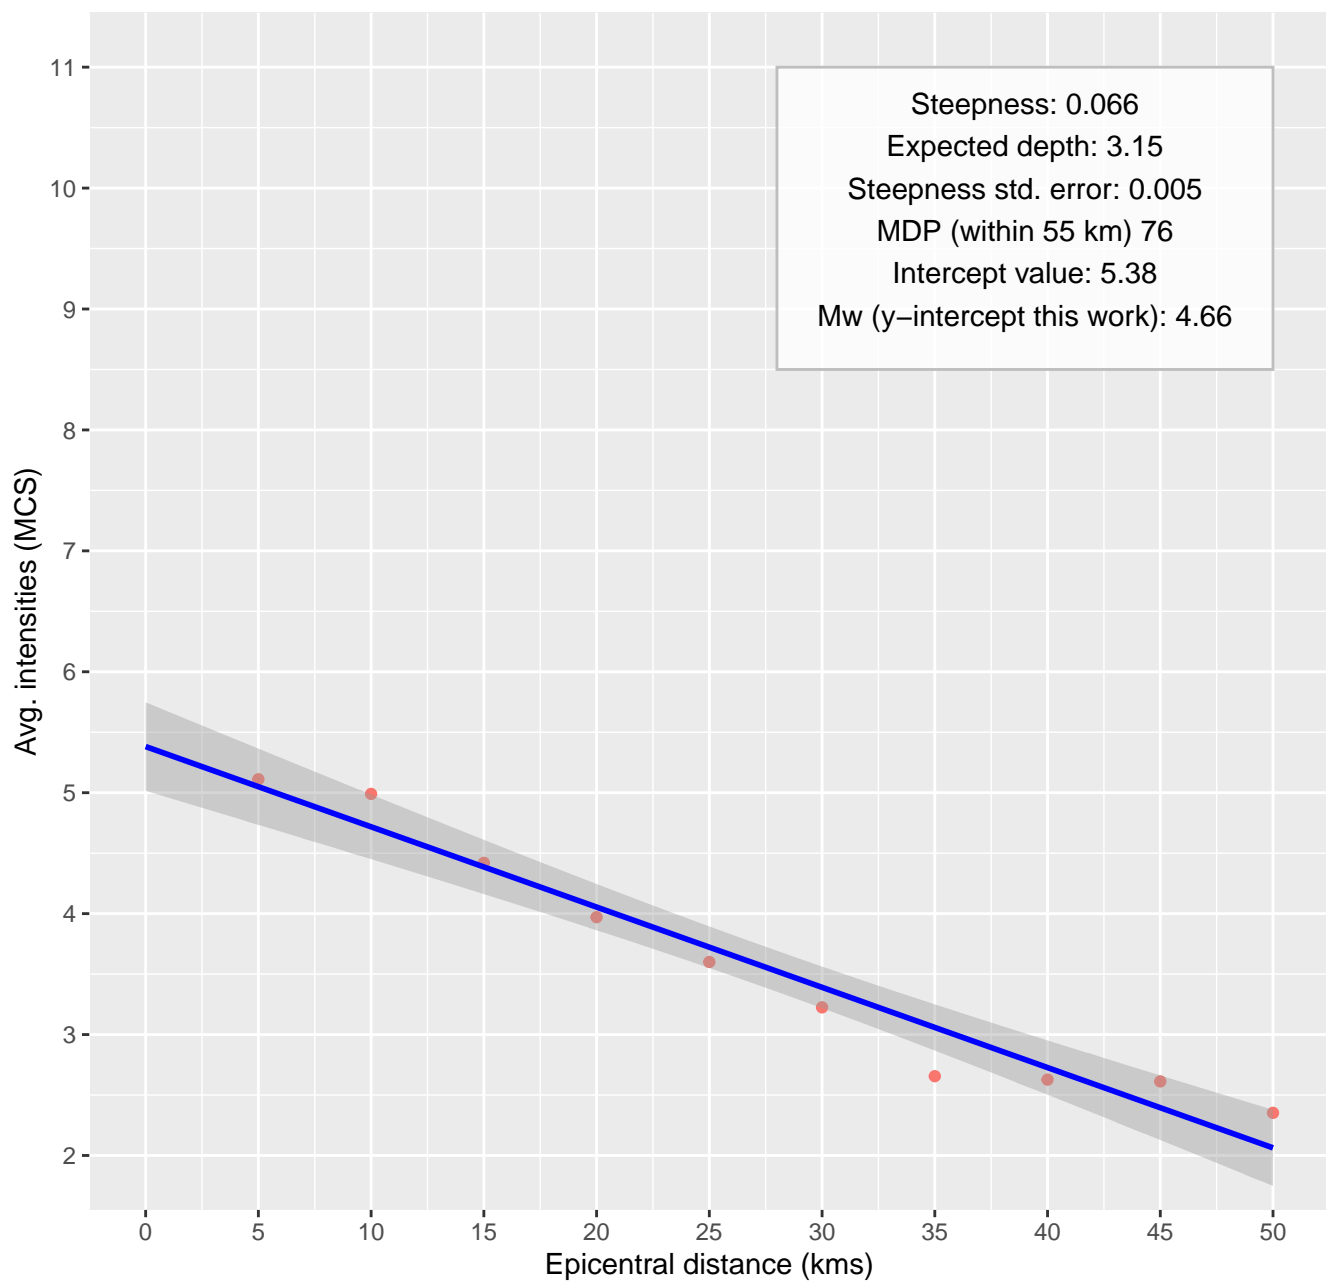

Supplement: Supplementary file 63 [file nhess-23-1007-2023-supplement.zip]

# DBMI\_ 19050908\_0143\_000 | 1905-09-08 – Calabria centrale

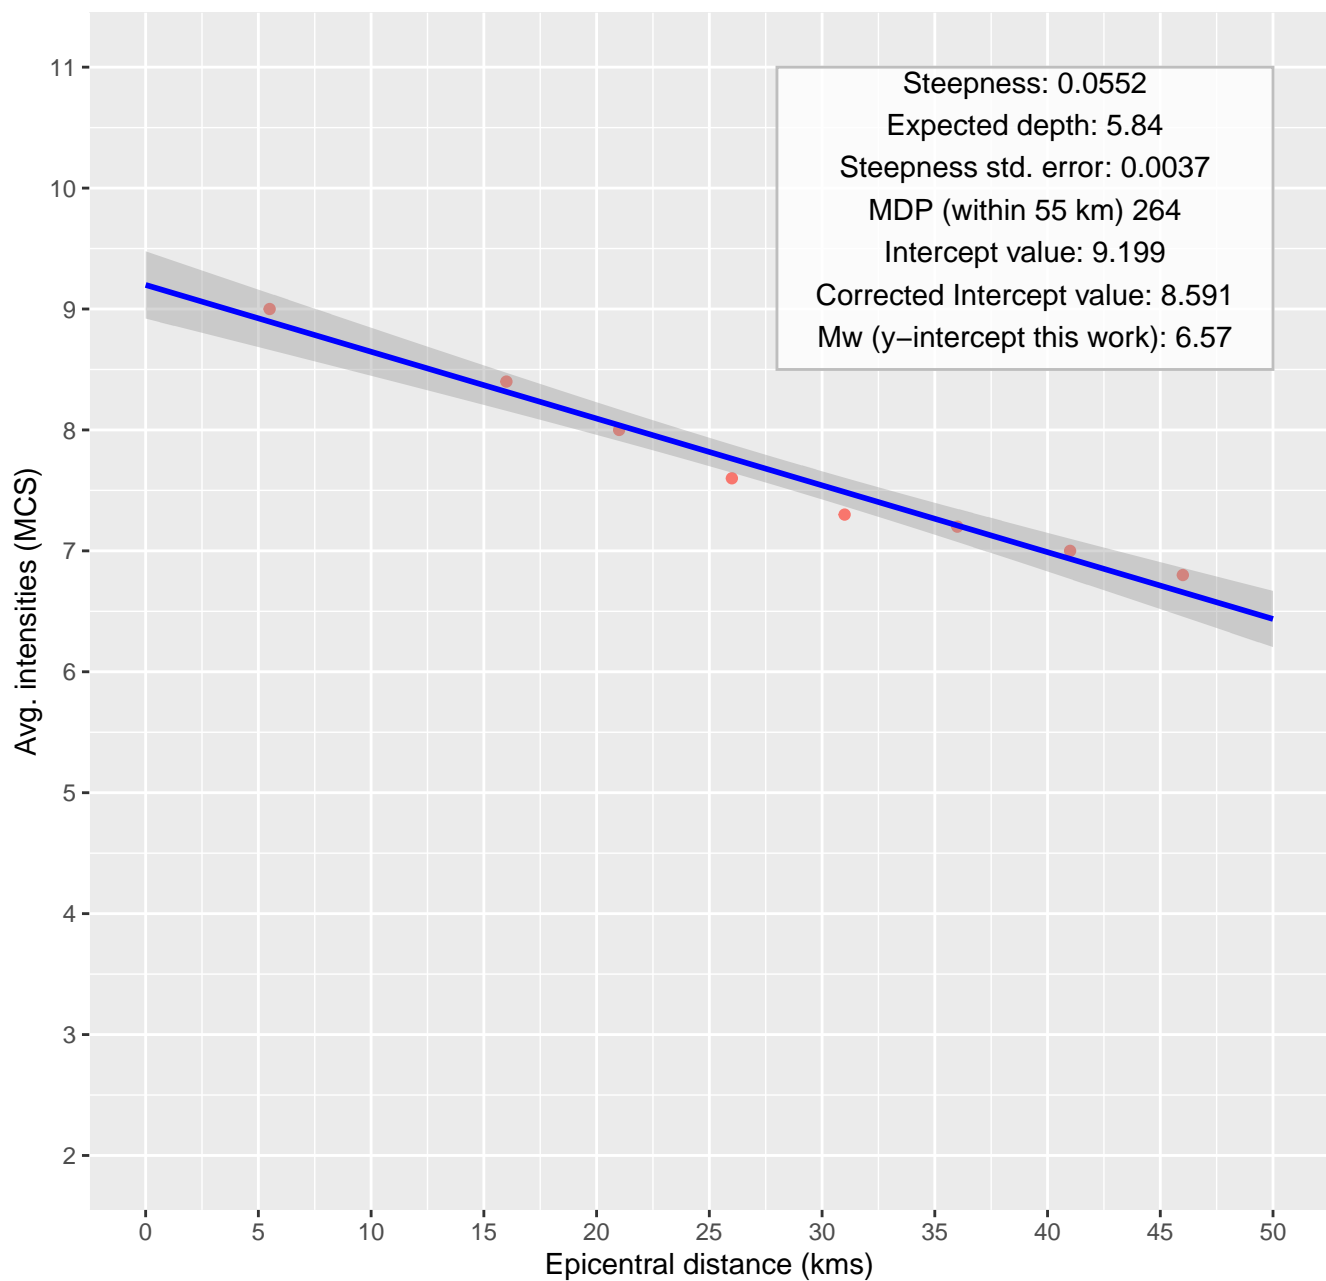

Supplement: Supplementary file 64 [file nhess-23-1007-2023-supplement.zip]

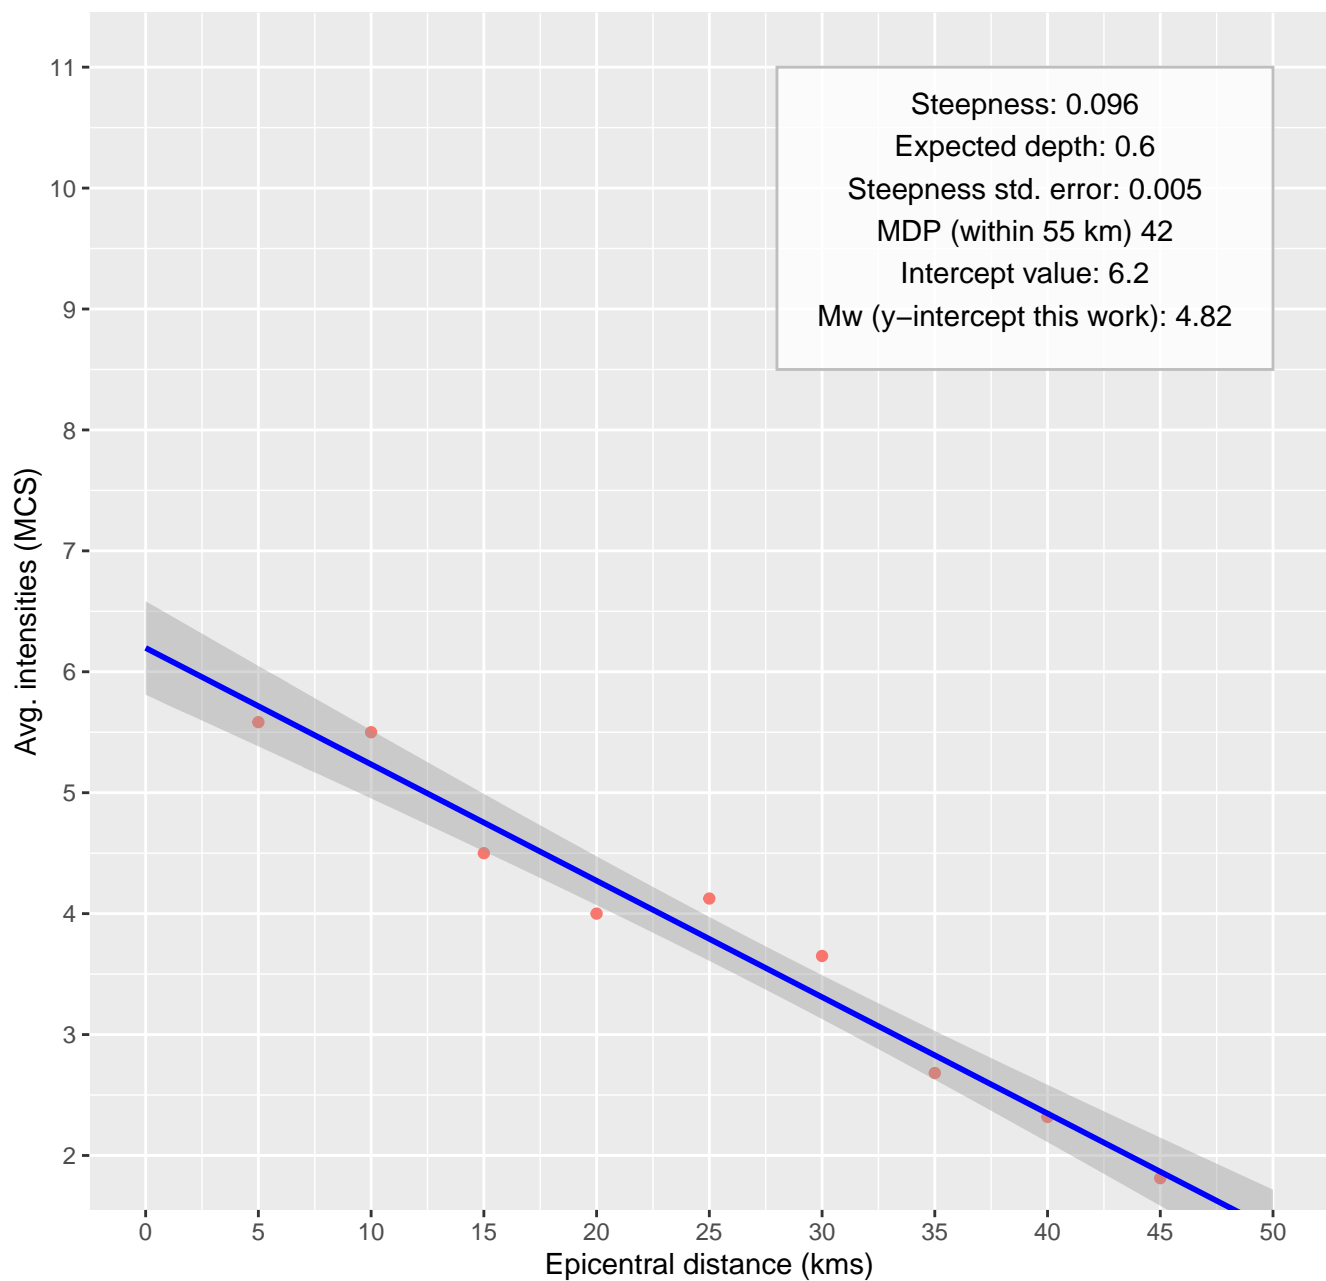

Supplement: Supplementary file 65 [file nhess-23-1007-2023-supplement.zip]

# DBMI\_ 19090113\_0045\_000 | 1909-01-13 – Emilia Romagna orientale

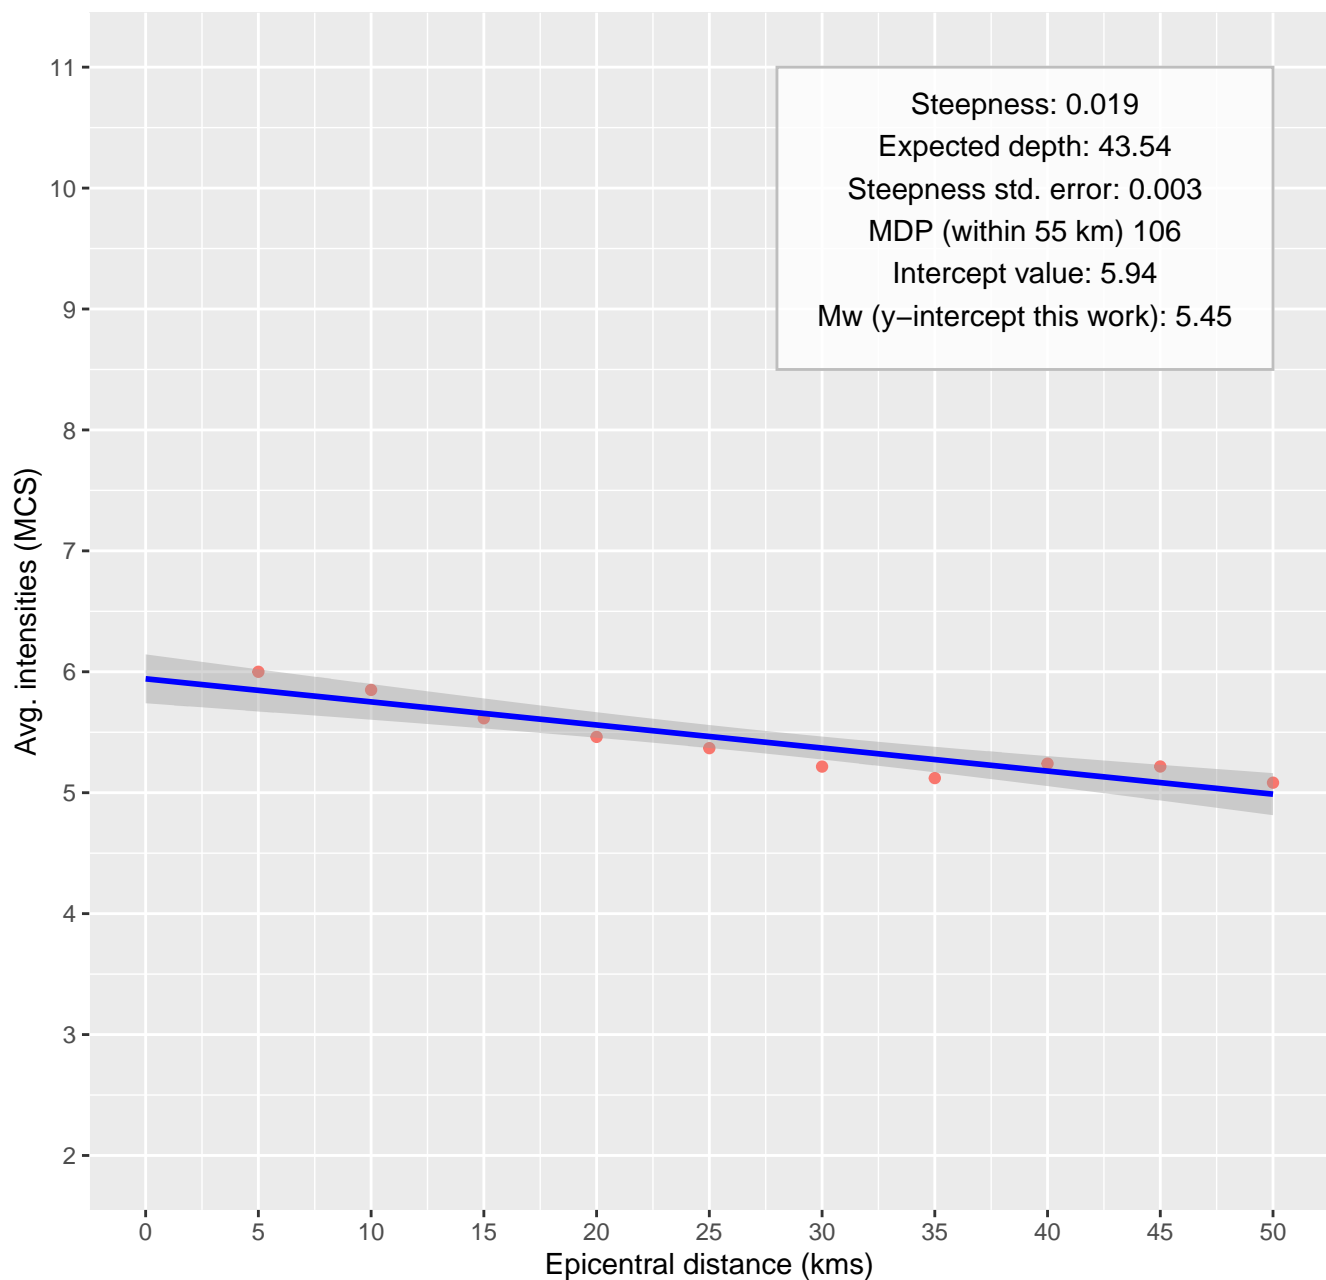

Supplement: Supplementary file 66 [file nhess-23-1007-2023-supplement.zip]

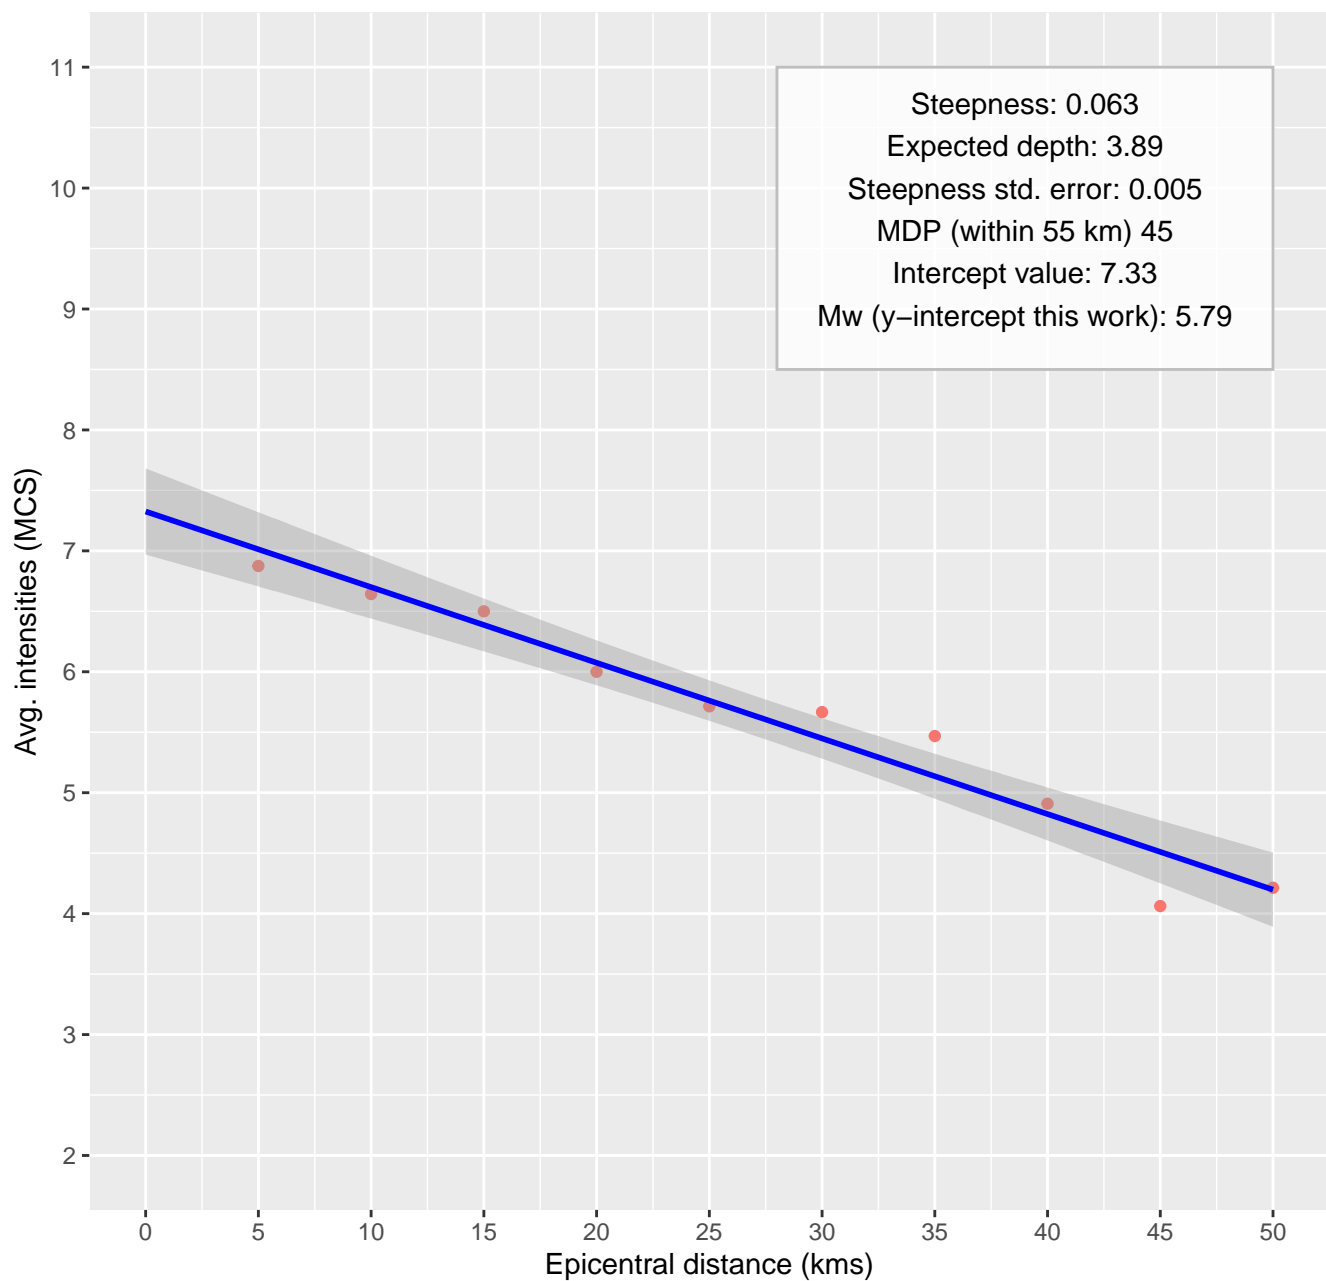

Supplement: Supplementary file 67 [file nhess-23-1007-2023-supplement.zip]

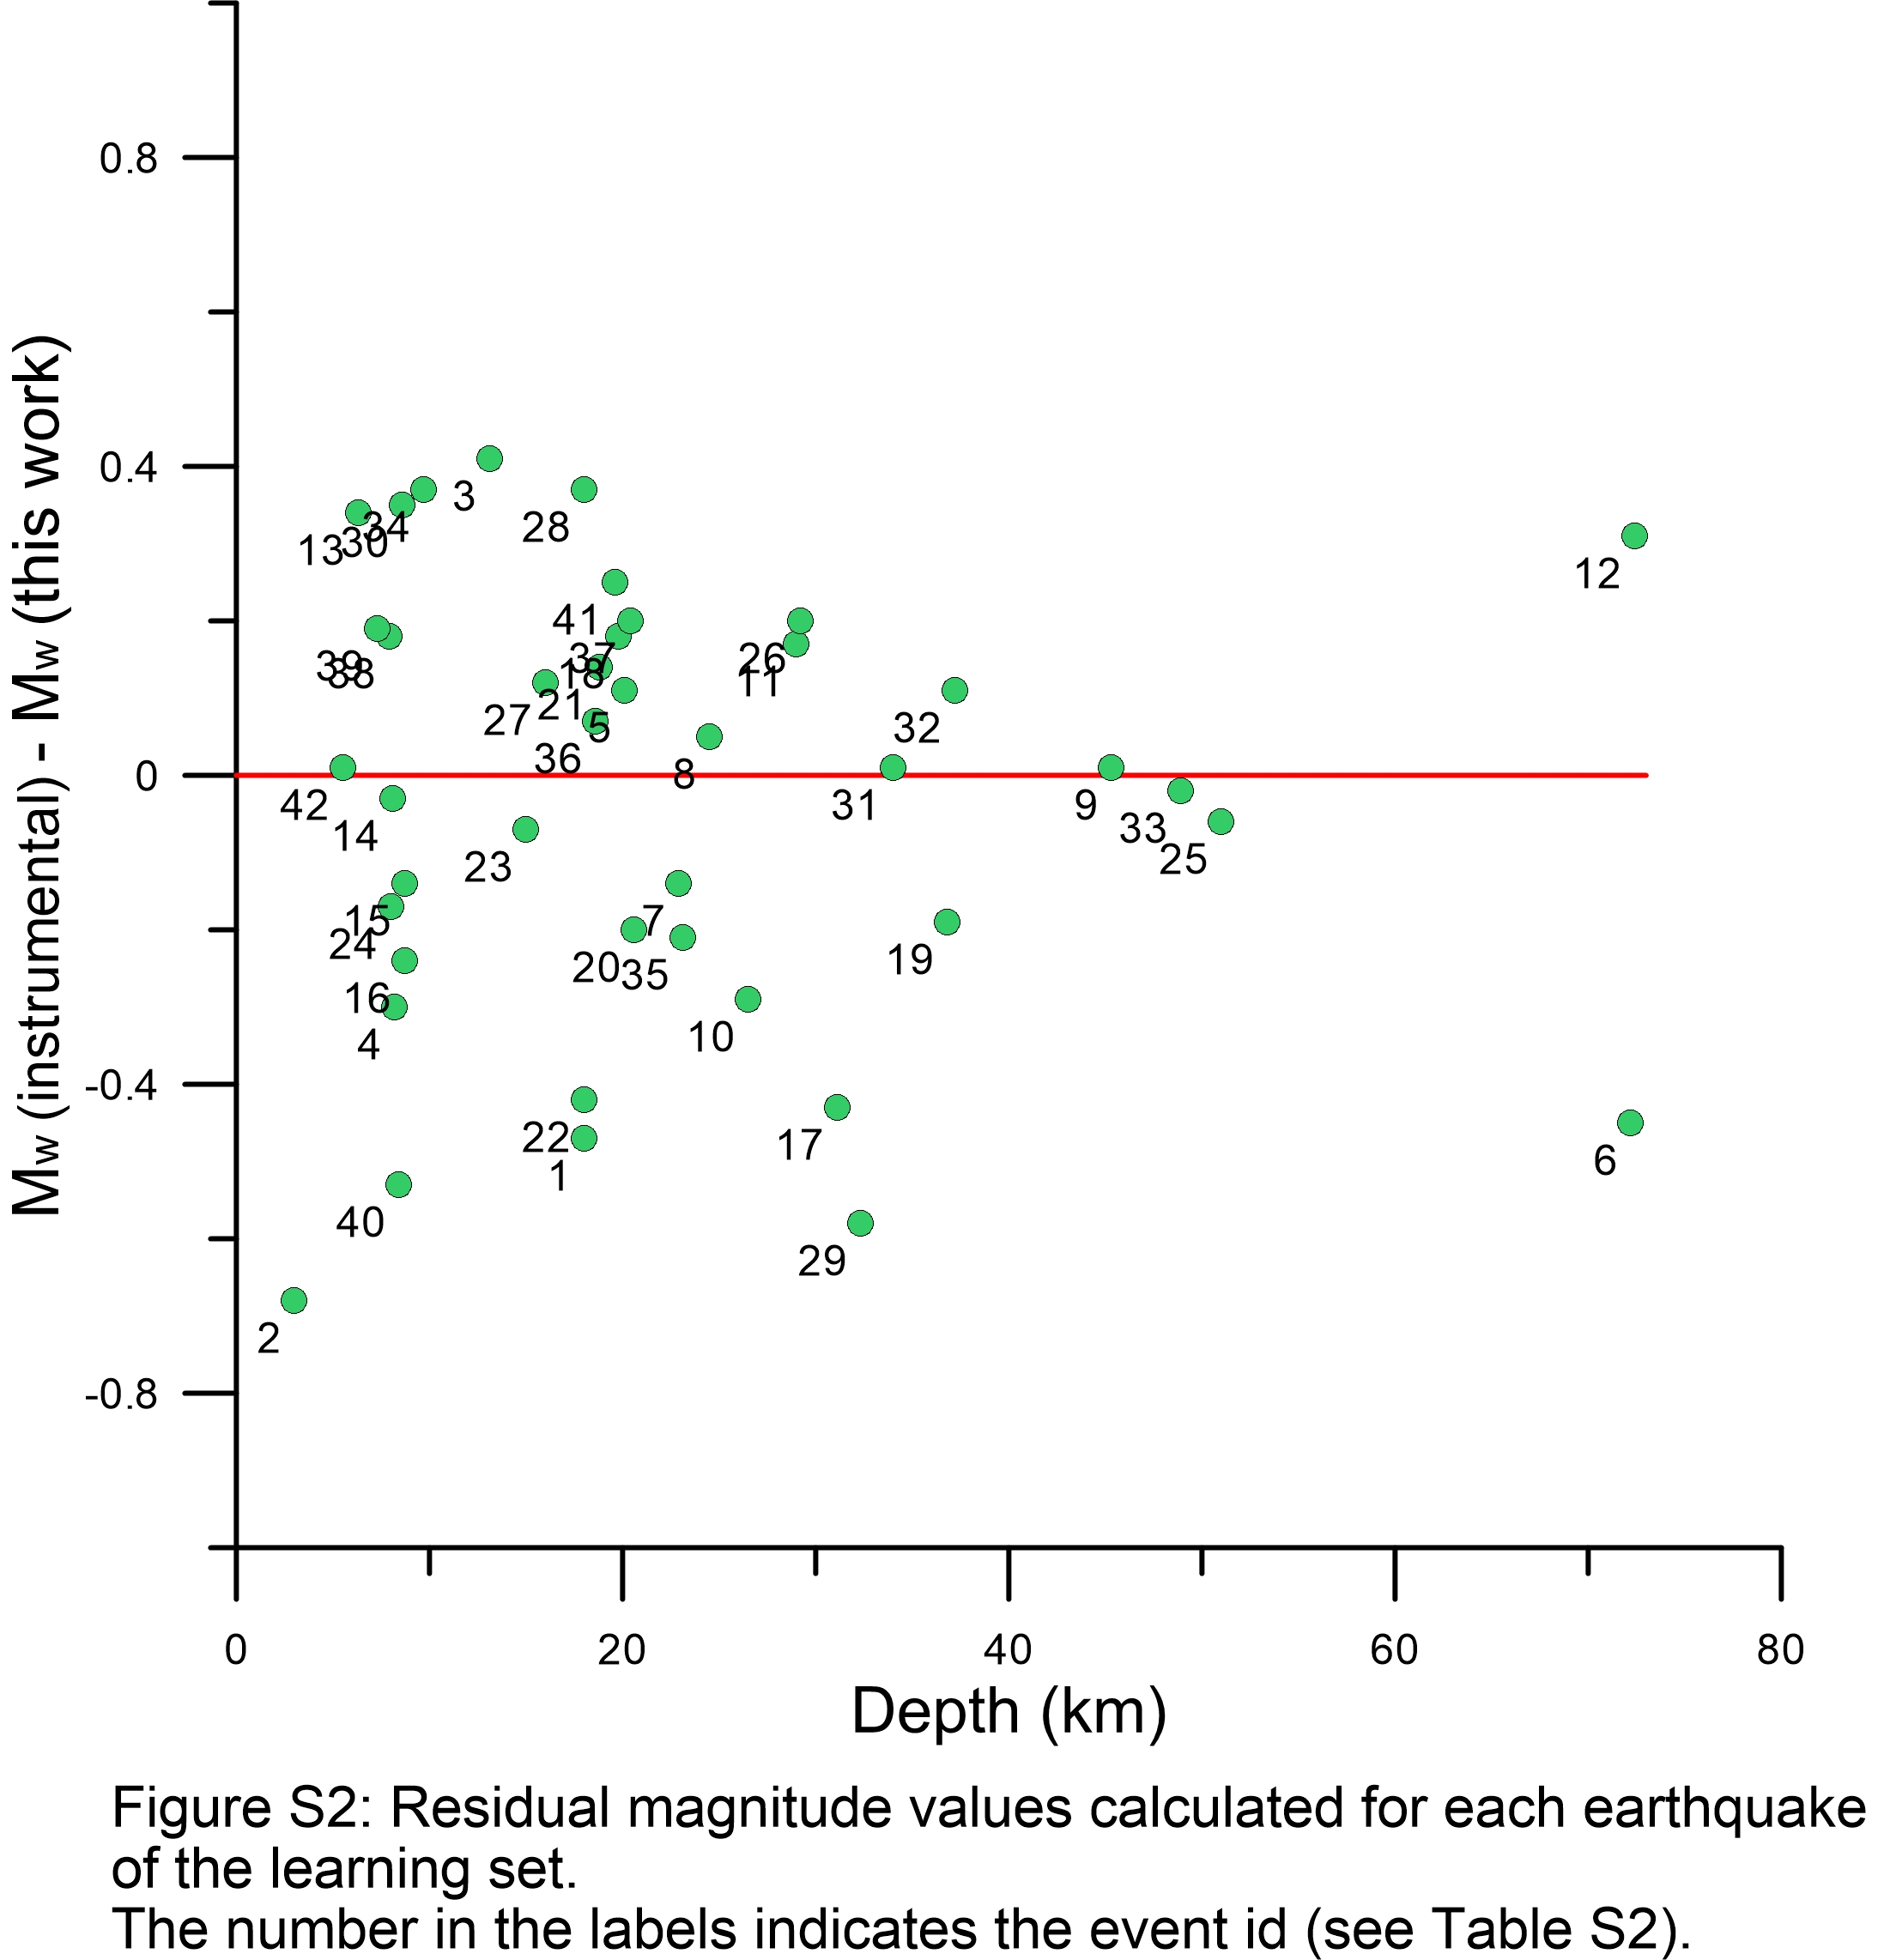

Supplement: Supplementary file 68 [file nhess-23-1007-2023-supplement.zip › nhess-2022-30-supplement-version3/Fig_S2.jpg]

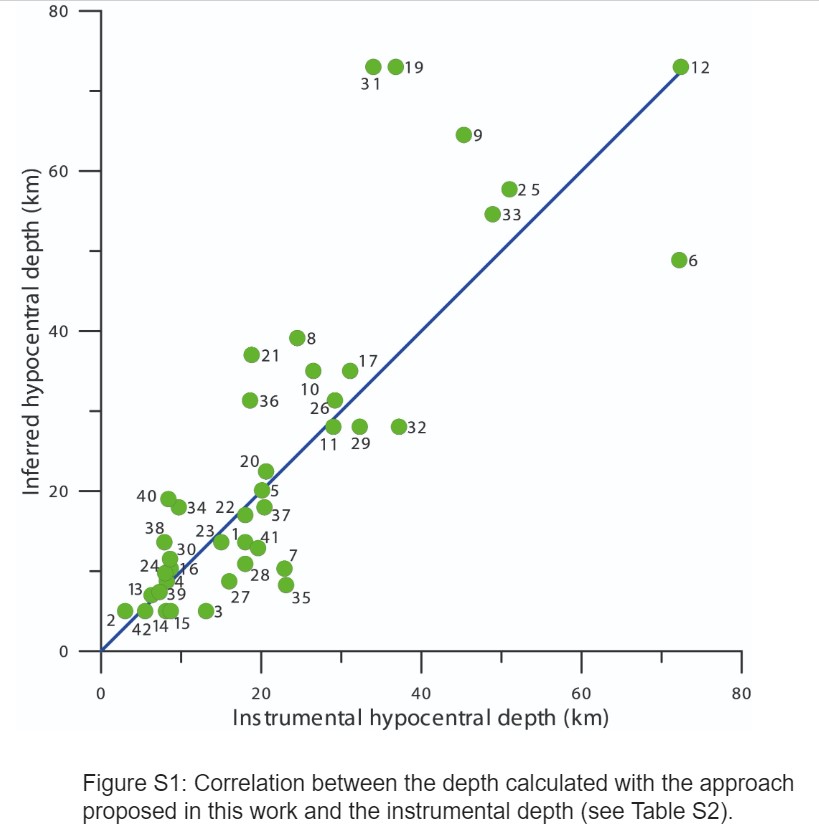

Supplement: Supplementary file 68 [file nhess-23-1007-2023-supplement.zip › nhess-2022-30-supplement-version3/Fig_S1.jpg]

# DBMI\_ 19801001\_0057\_000 | 1980-10-01 – Frusinate

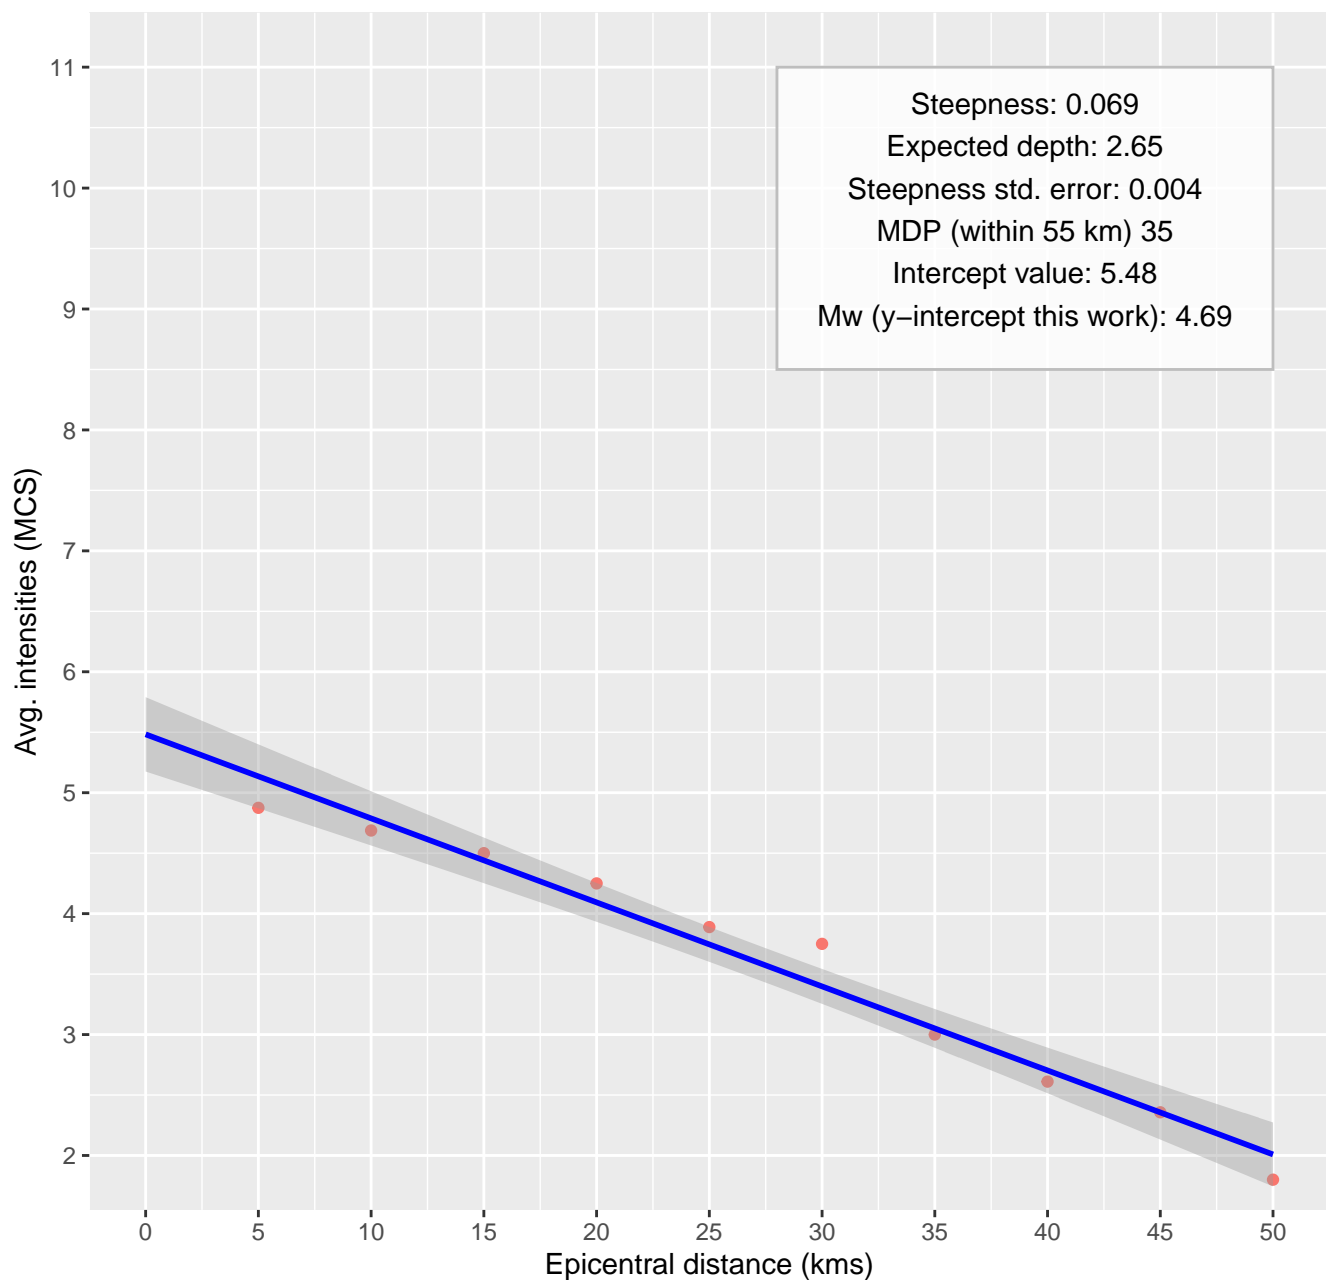

Supplement: Supplementary file 69 [file nhess-23-1007-2023-supplement.zip]

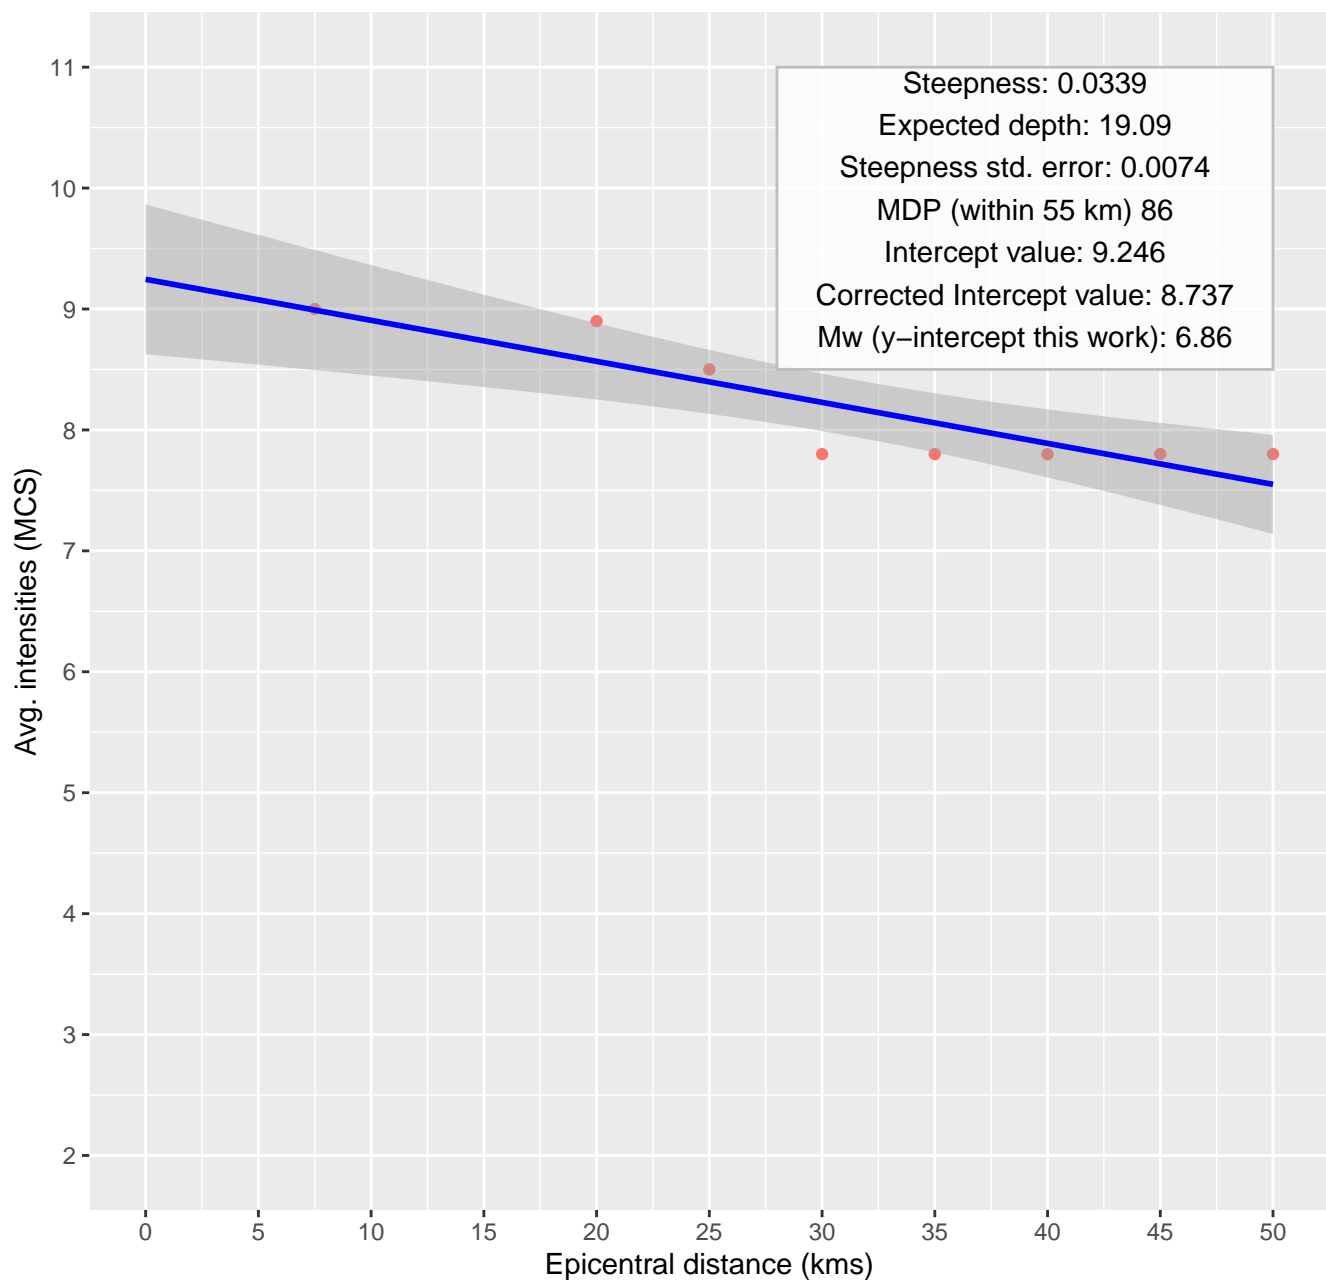

Supplement: Supplementary file 70 [file nhess-23-1007-2023-supplement.zip]

# DBMI\_ 18970906\_0310\_000 | 1897-09-06 – Valdarno inferiore

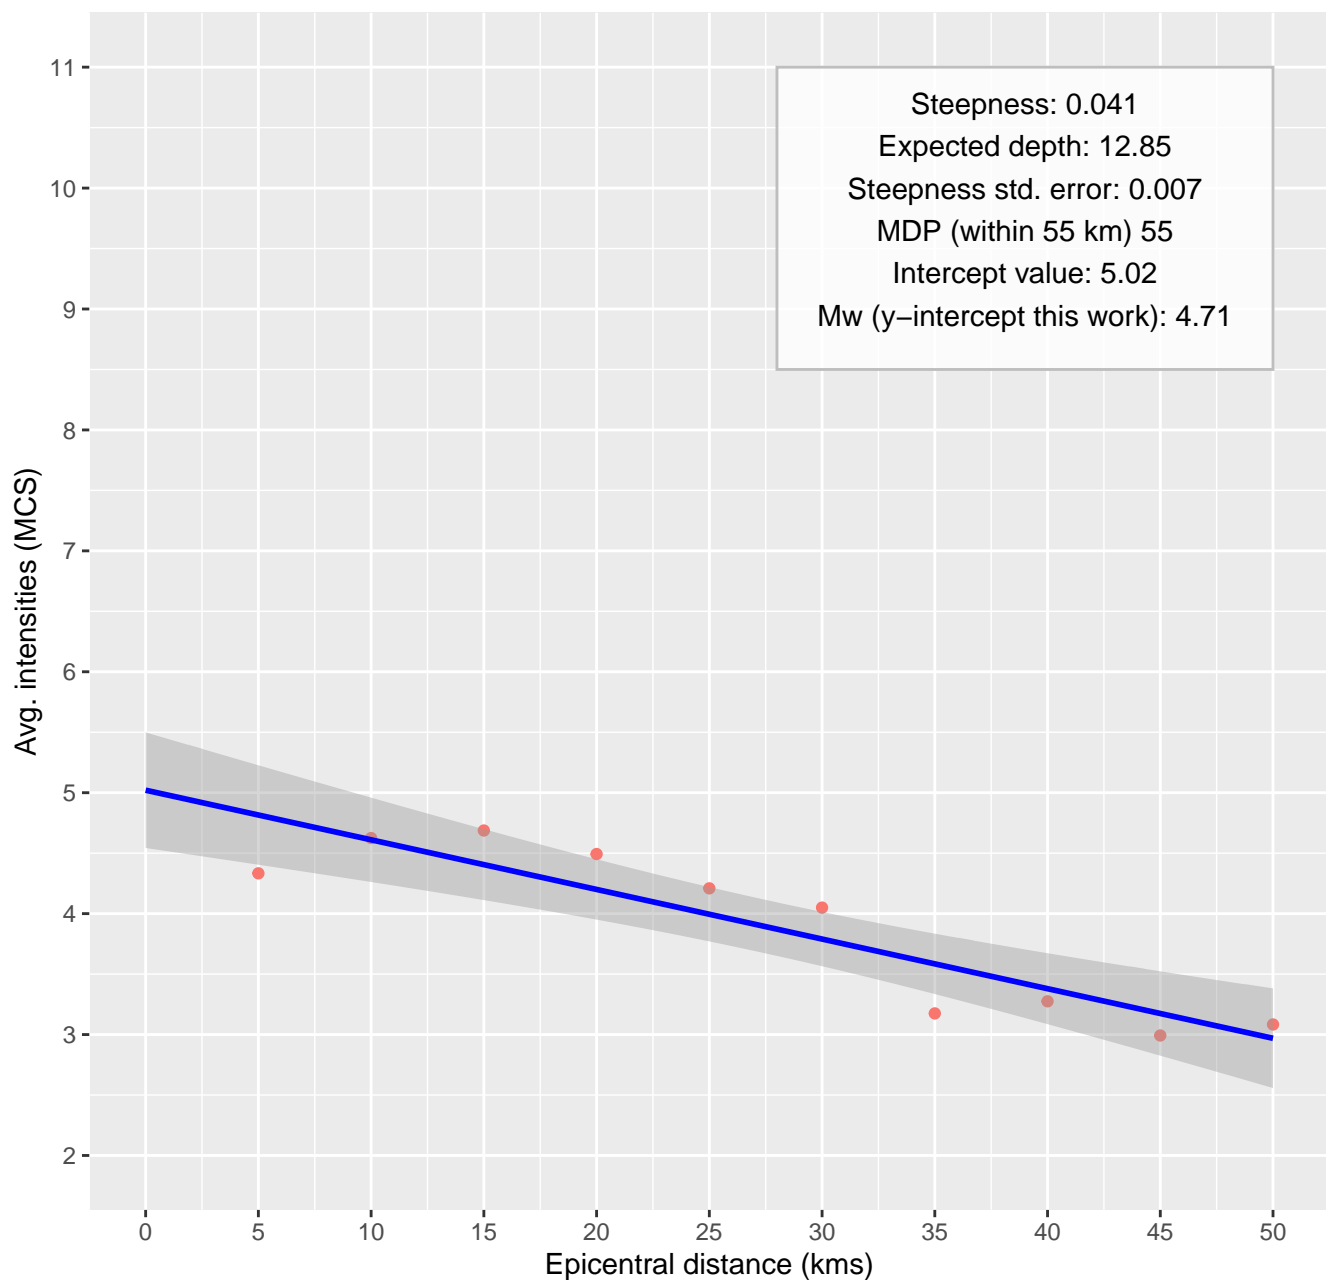

Supplement: Supplementary file 71 [file nhess-23-1007-2023-supplement.zip]

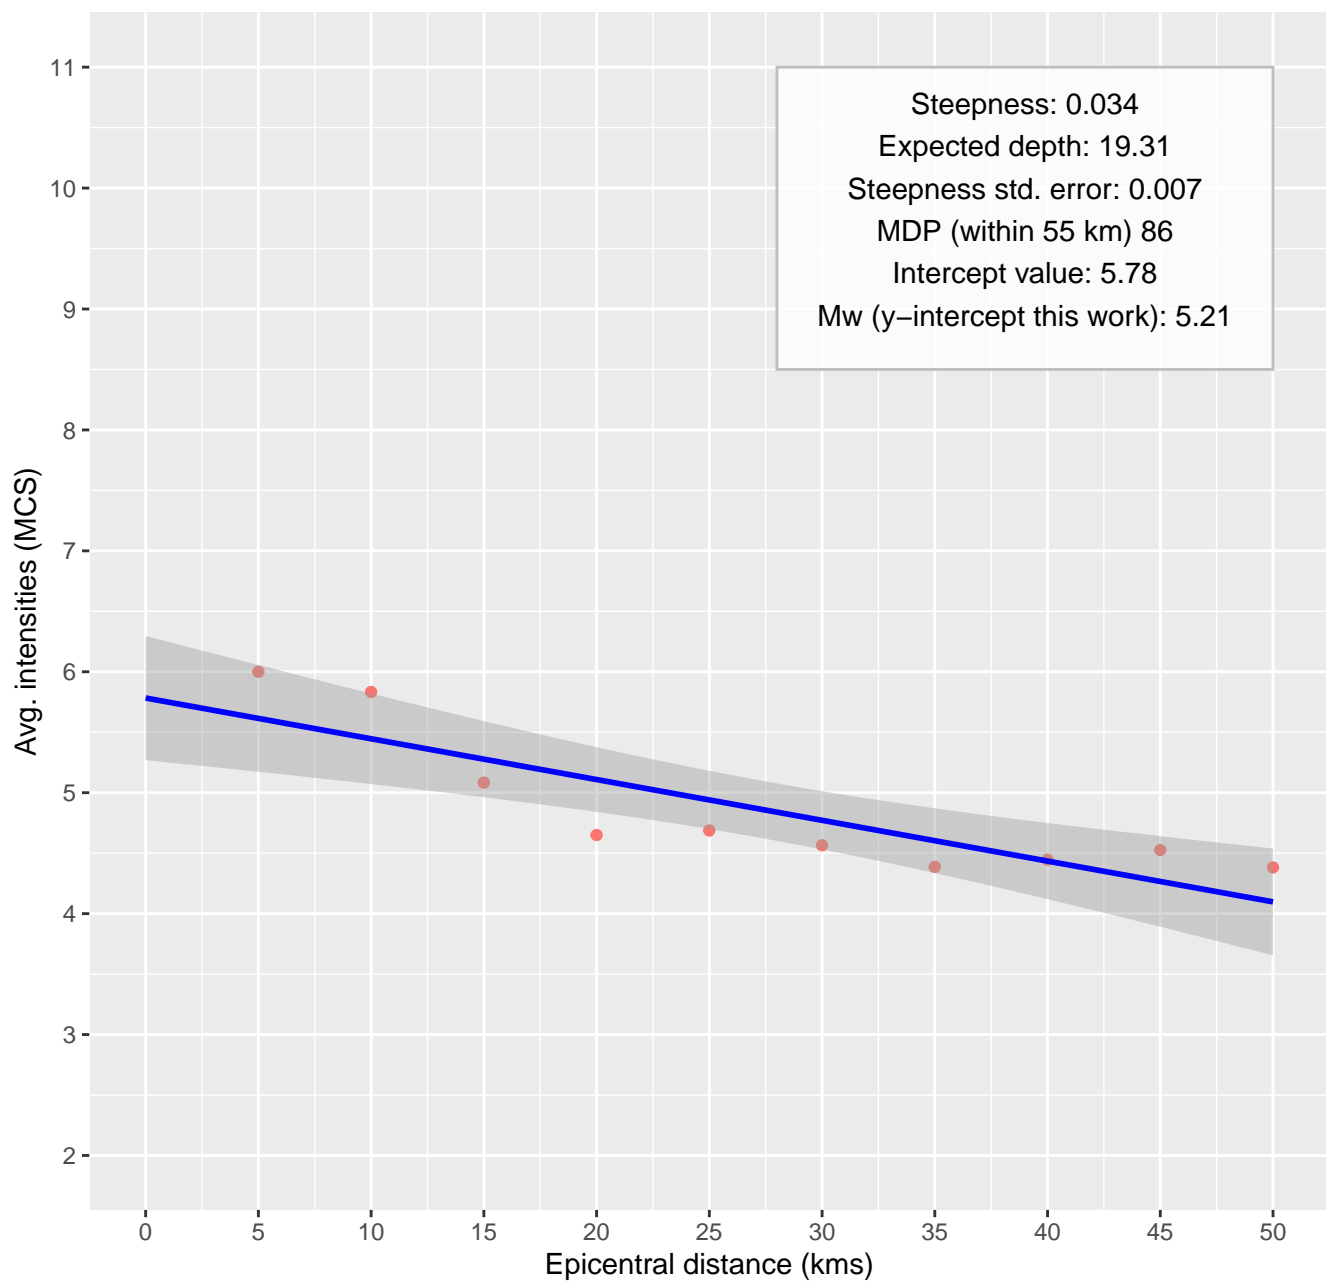

Supplement: Supplementary file 72 [file nhess-23-1007-2023-supplement.zip]

# DBMI\_ 18930125\_0000\_000 | 1893-01-25 – Vallo di Diano

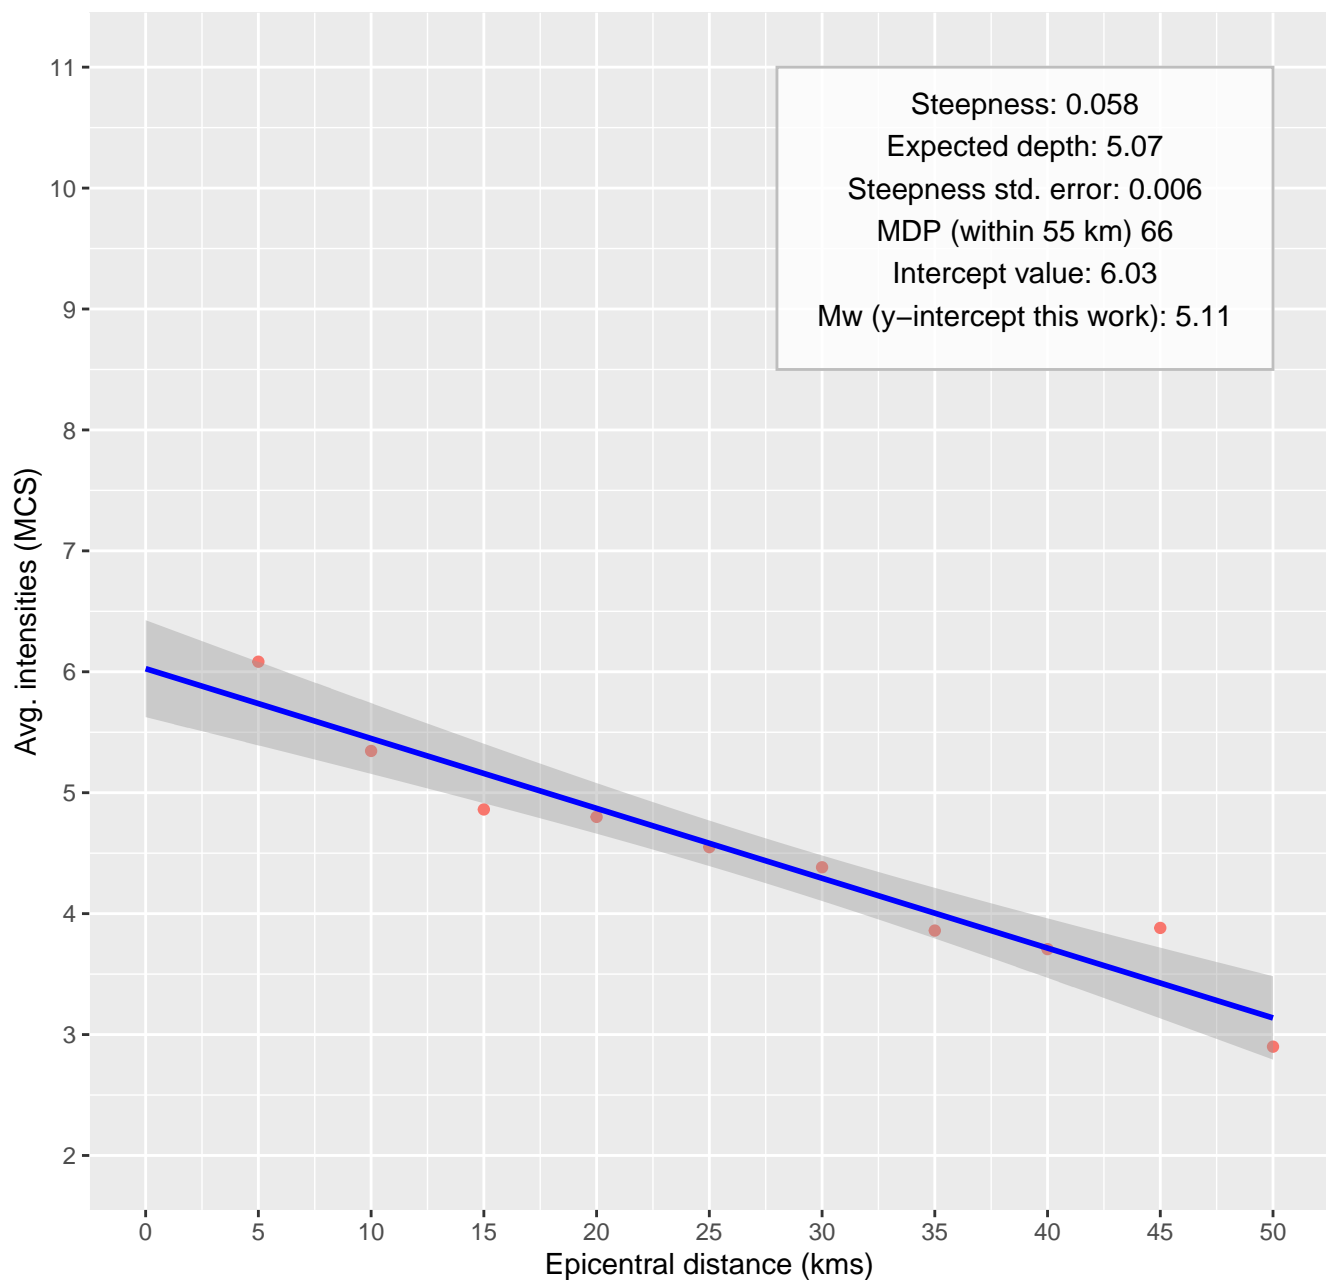

Supplement: Supplementary file 73 [file nhess-23-1007-2023-supplement.zip]

# DBMI\_ 19690106\_2203\_000 | 1969-01-06 – Appennino pistoiese

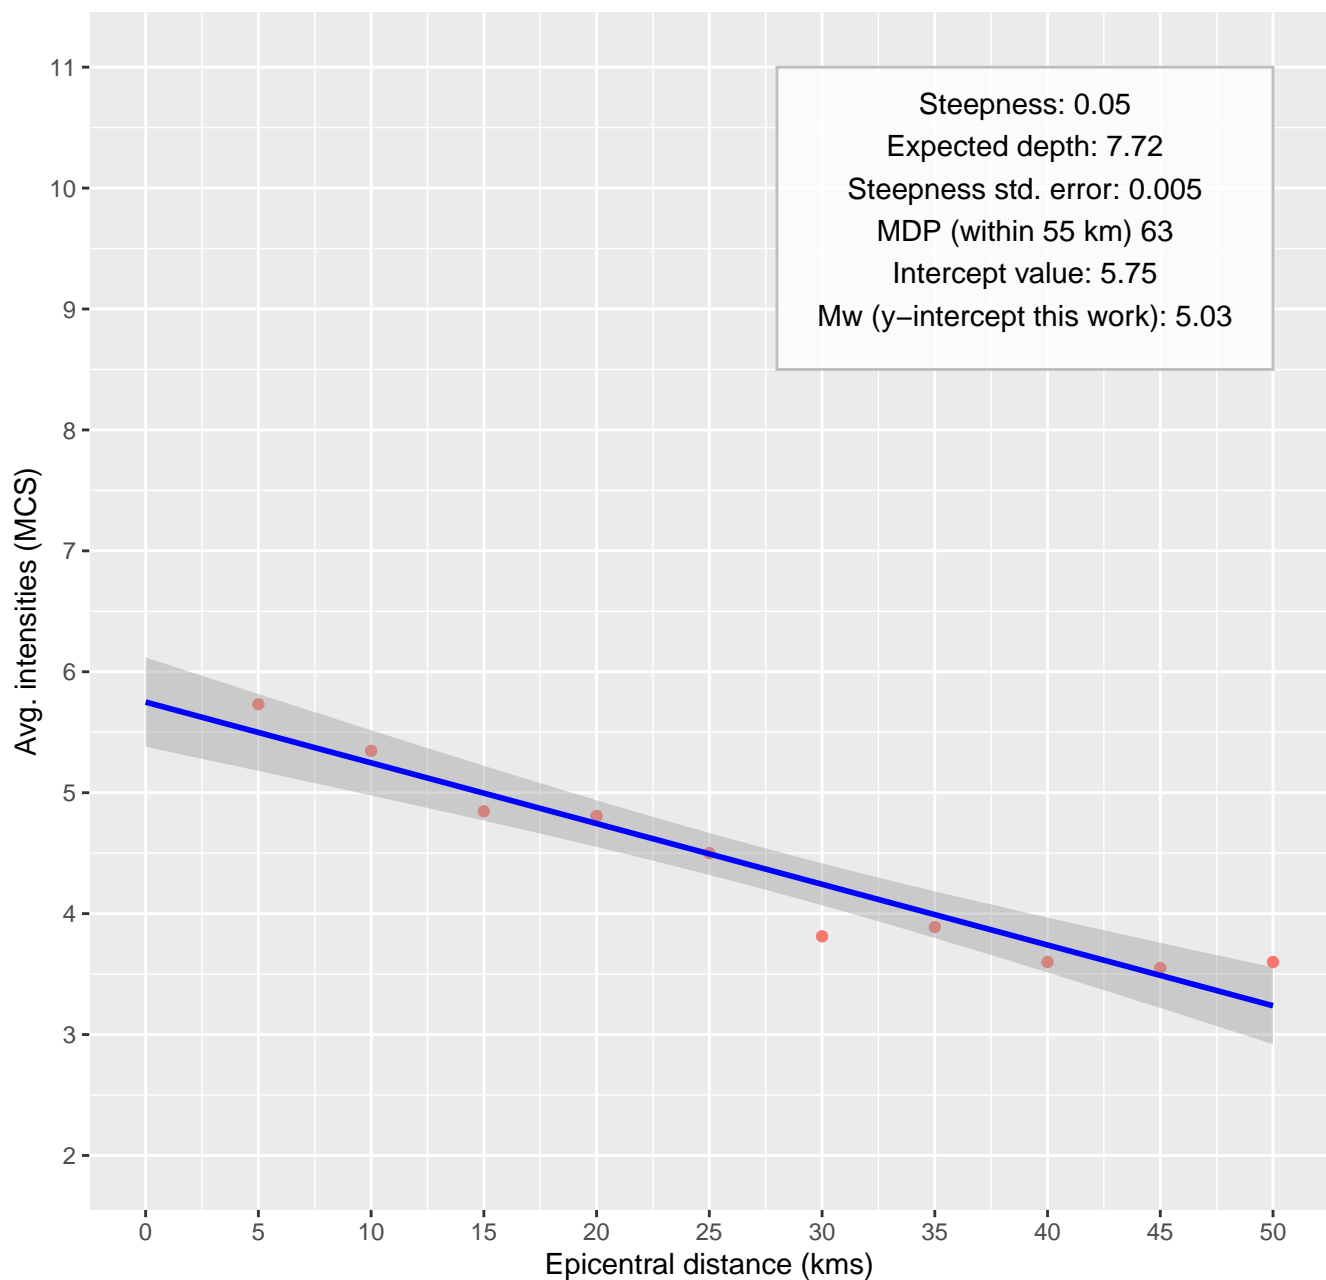

Supplement: Supplementary file 74 [file nhess-23-1007-2023-supplement.zip]

# DBMI\_ 19510515\_2254\_000 | 1951-05-15 – Lodigiano

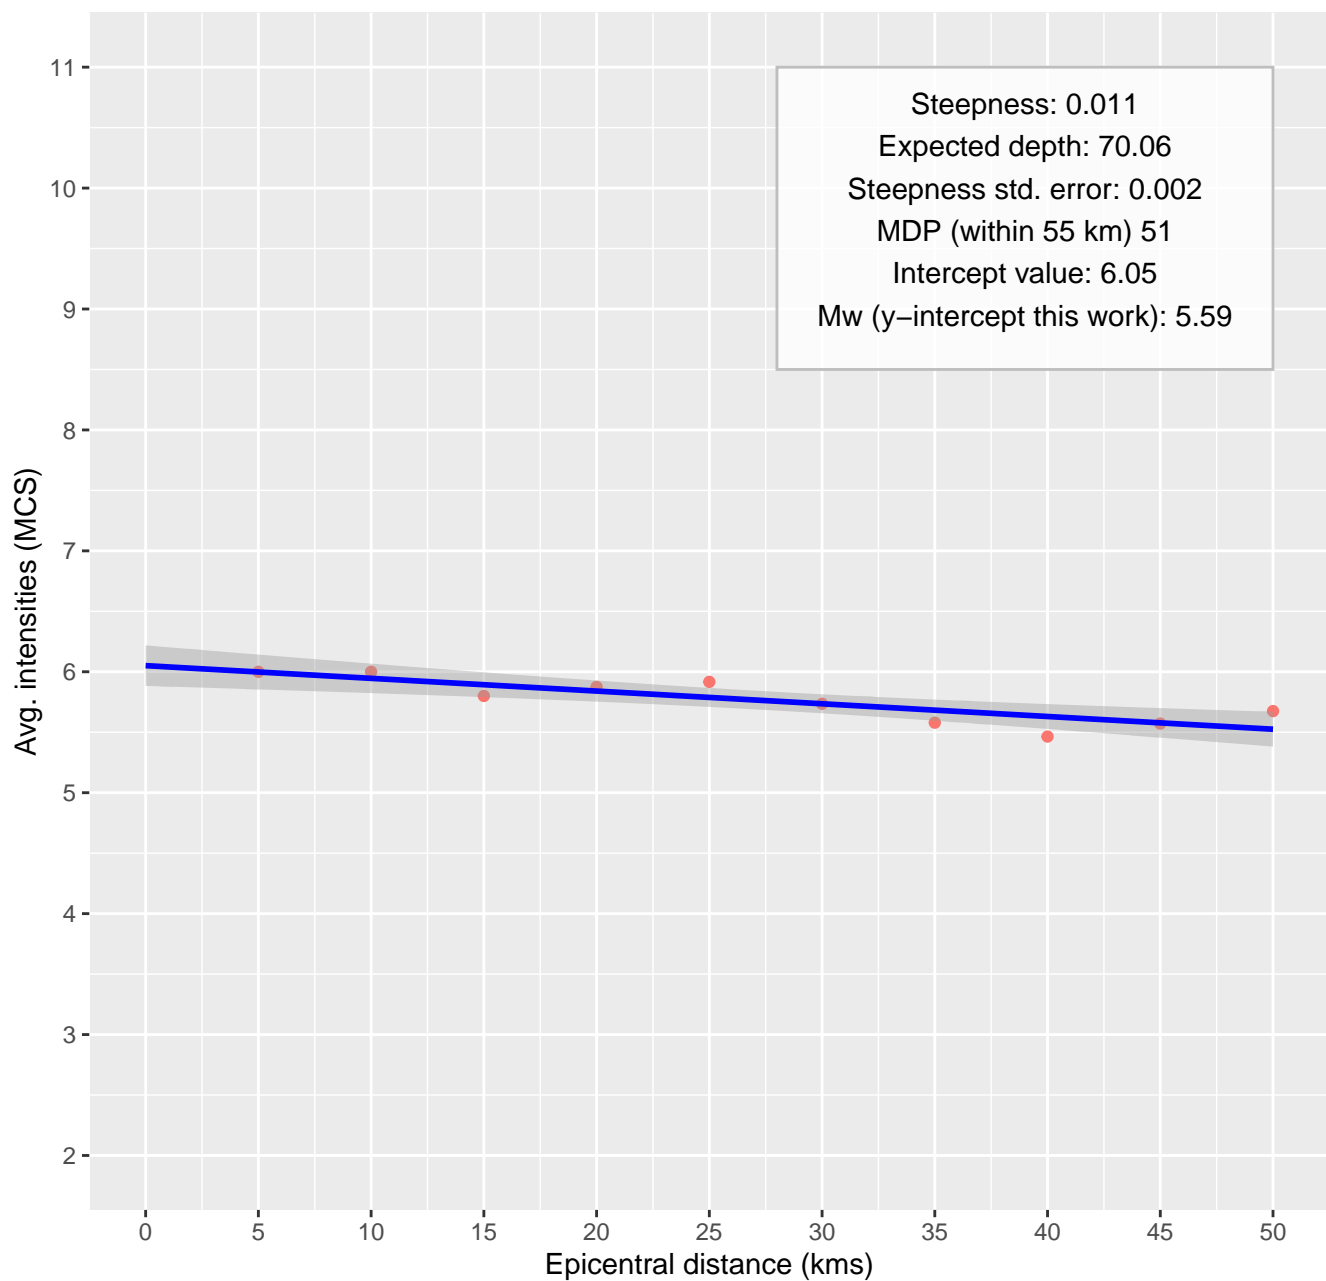

Supplement: Supplementary file 75 [file nhess-23-1007-2023-supplement.zip]

# DBMI\_ 19361018\_0310\_000 | 1936-10-18 – Alpago Cansiglio

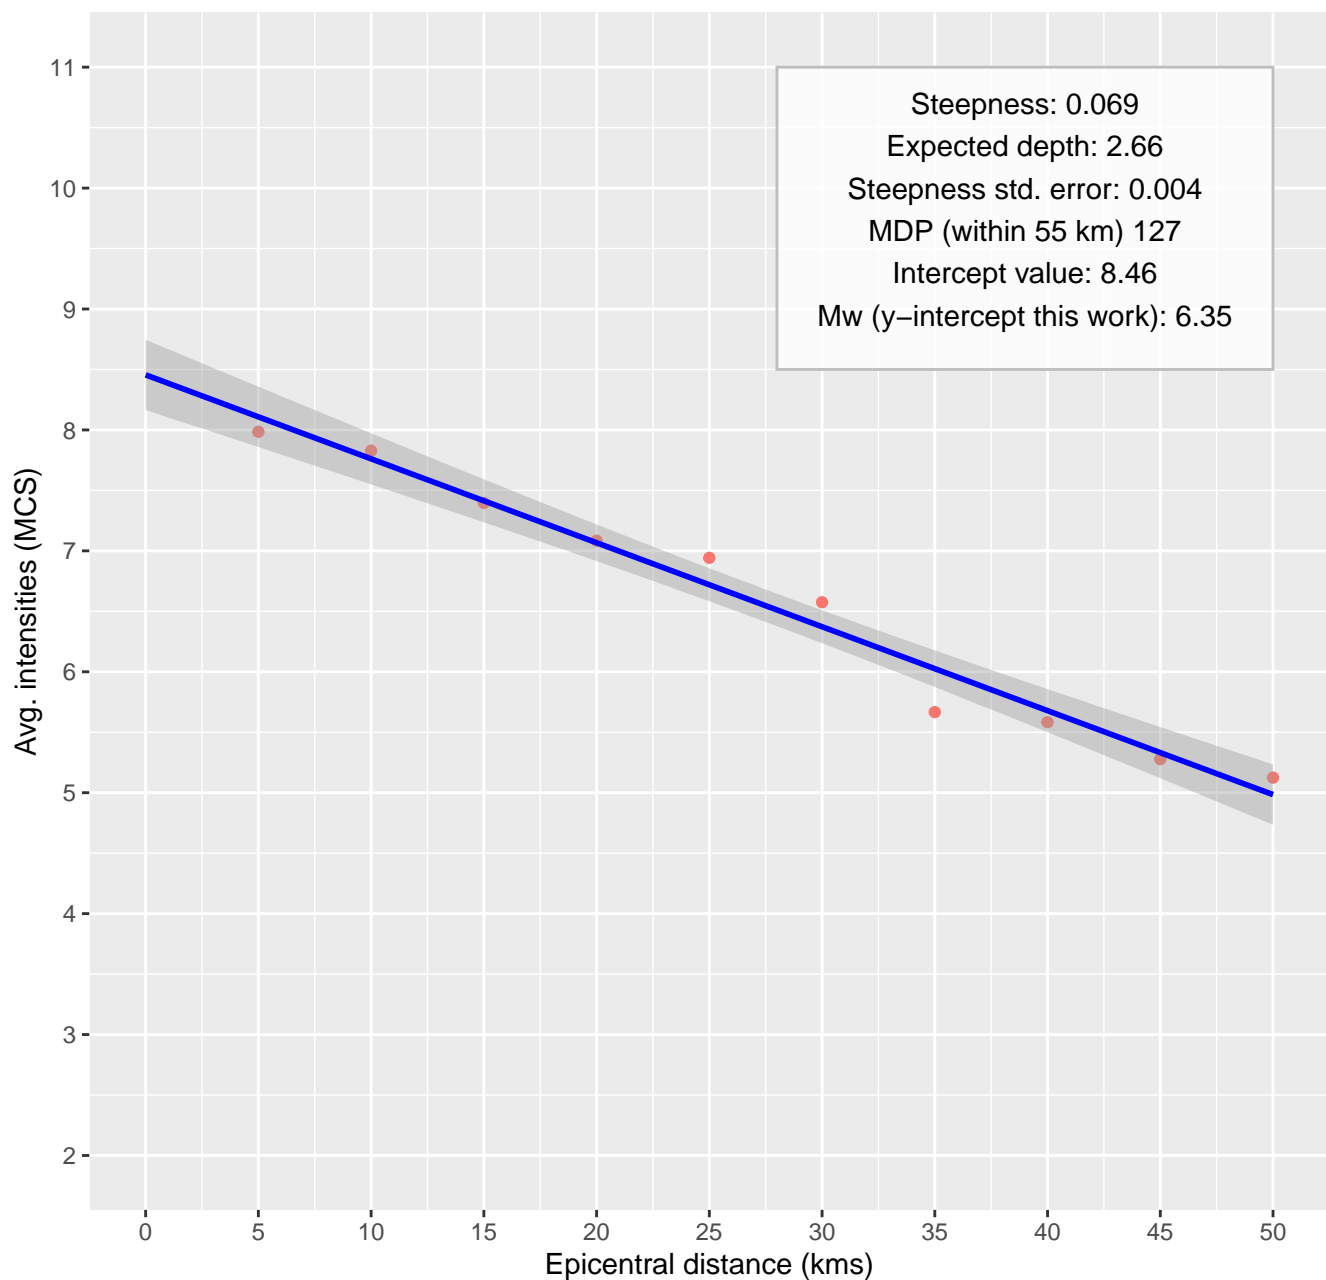

Supplement: Supplementary file 76 [file nhess-23-1007-2023-supplement.zip]

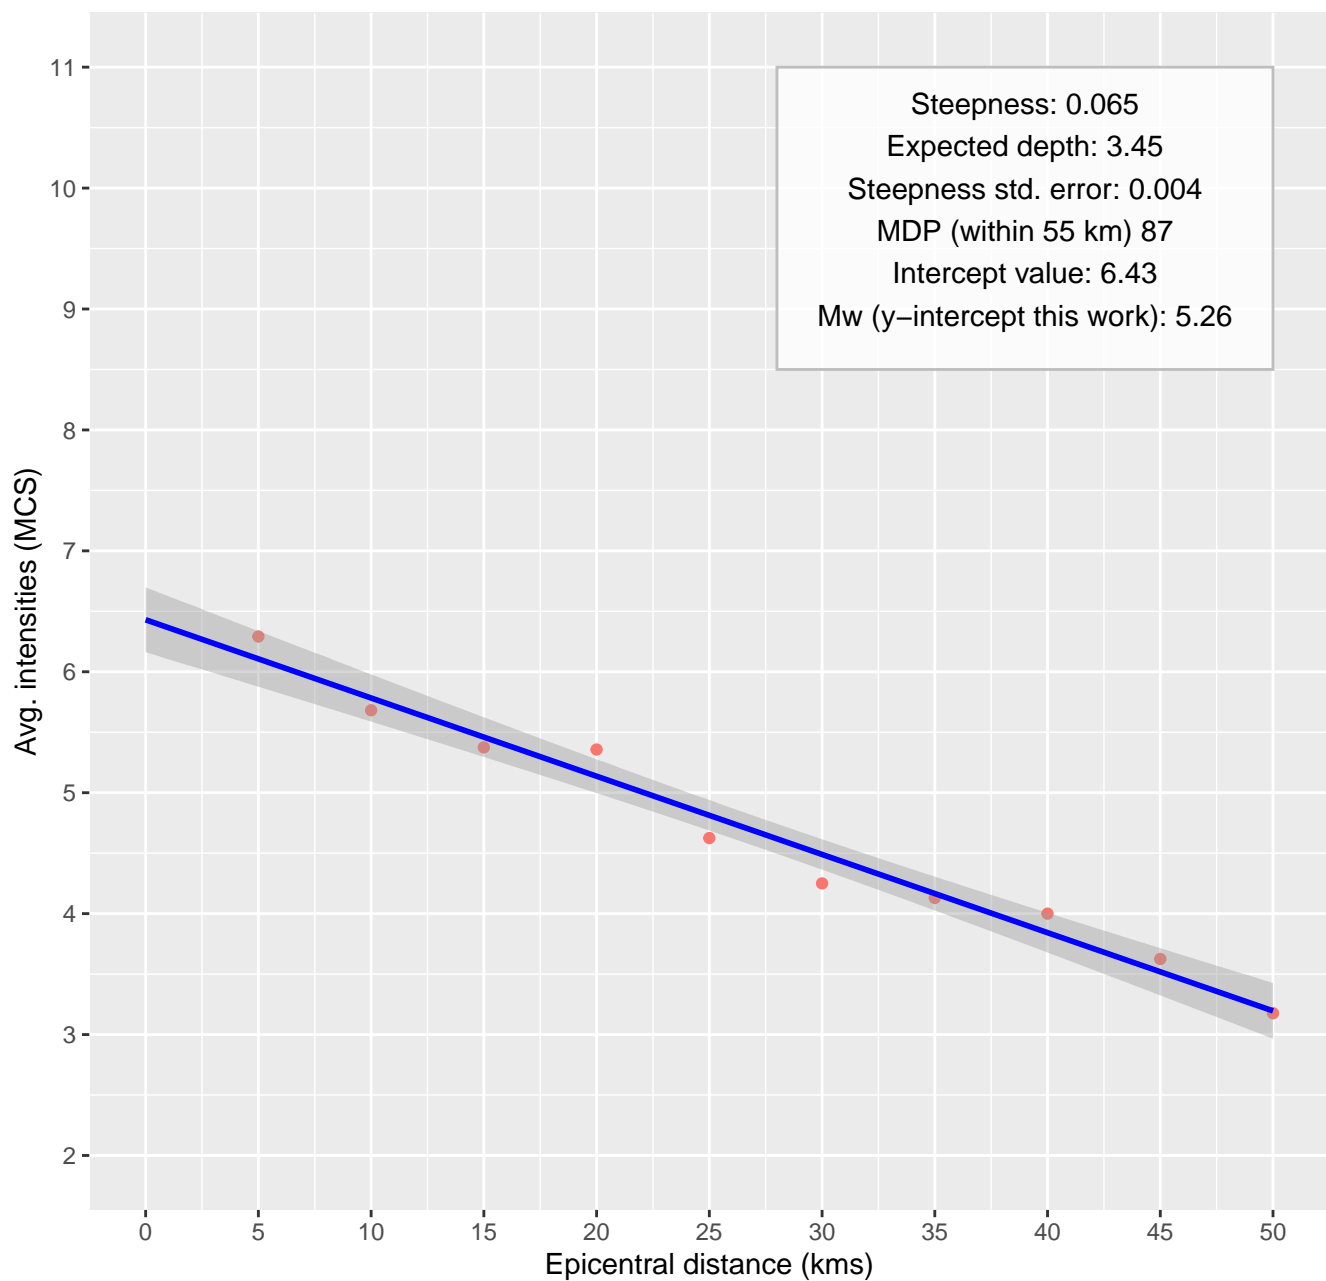

Supplement: Supplementary file 77 [file nhess-23-1007-2023-supplement.zip]

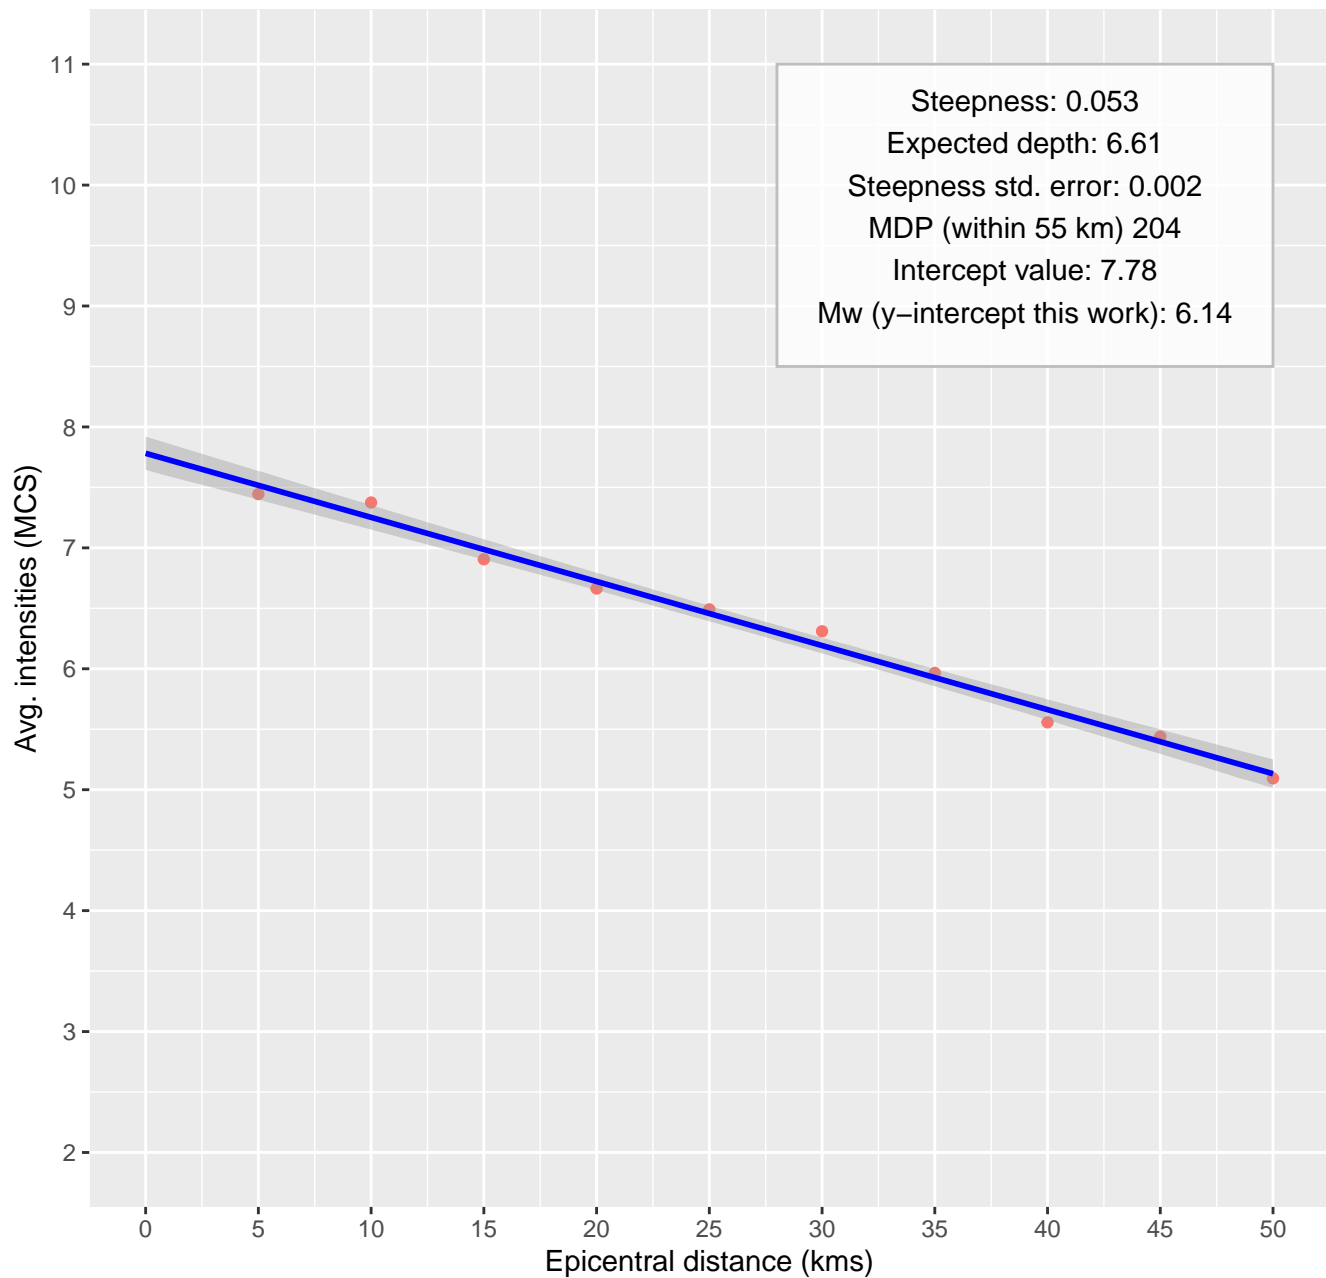

Supplement: Supplementary file 78 [file nhess-23-1007-2023-supplement.zip]

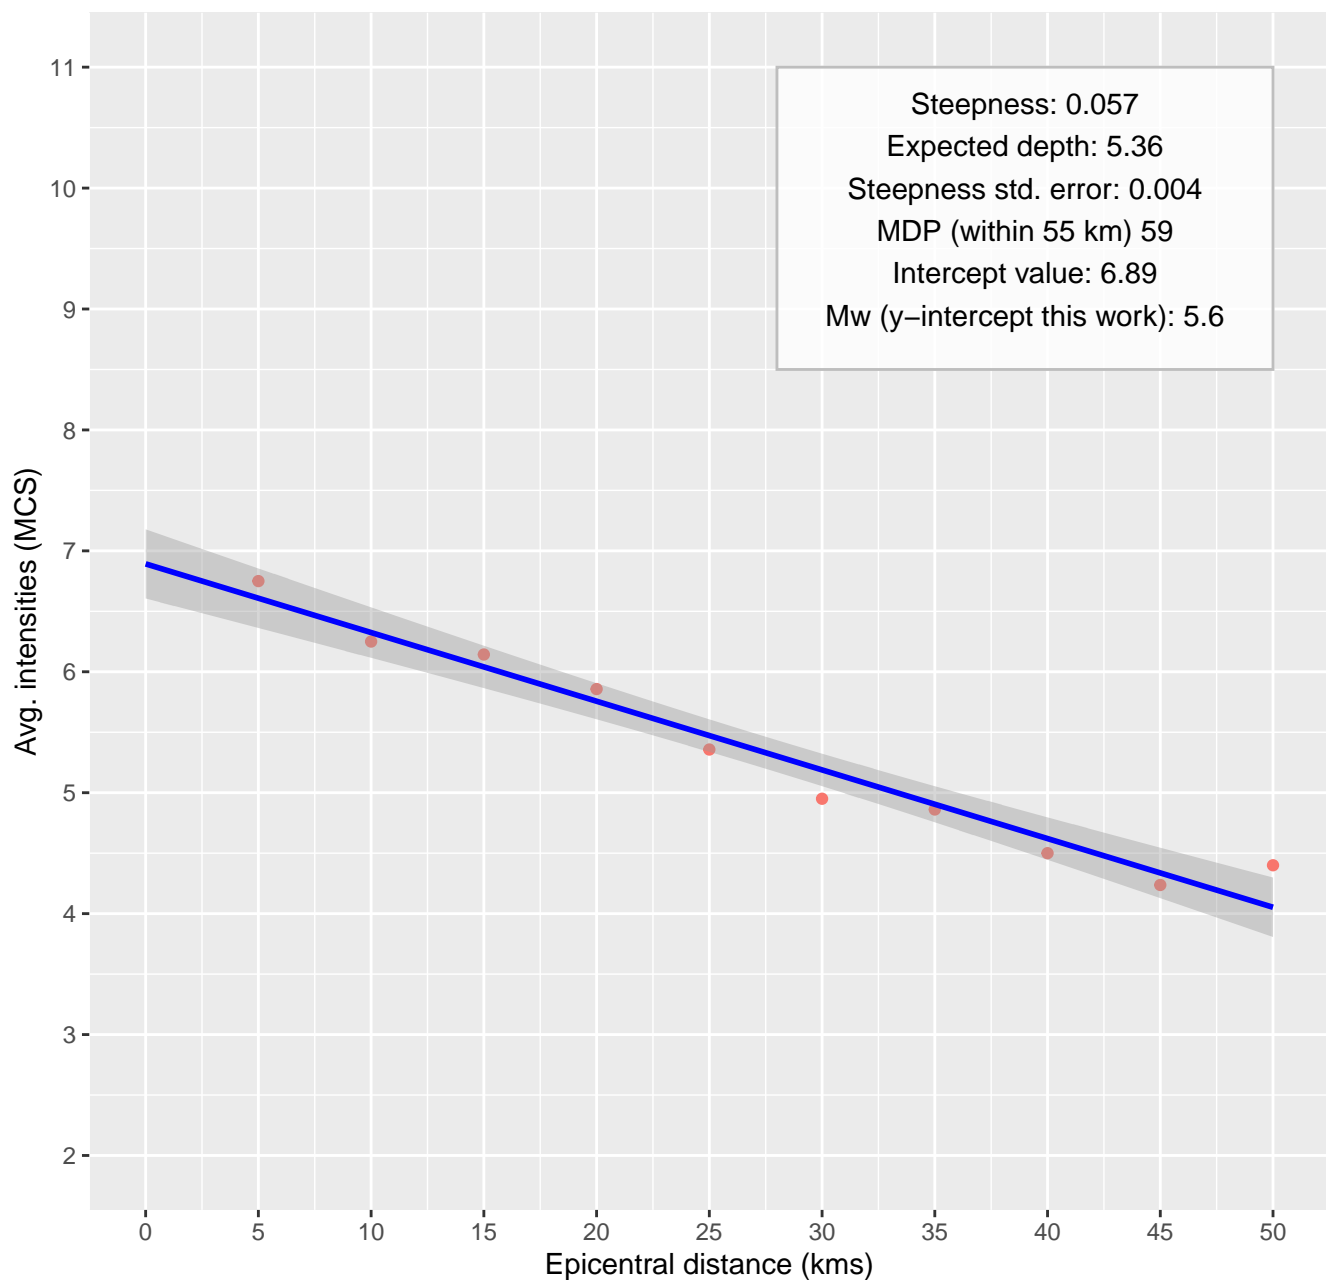

Supplement: Supplementary file 79 [file nhess-23-1007-2023-supplement.zip]

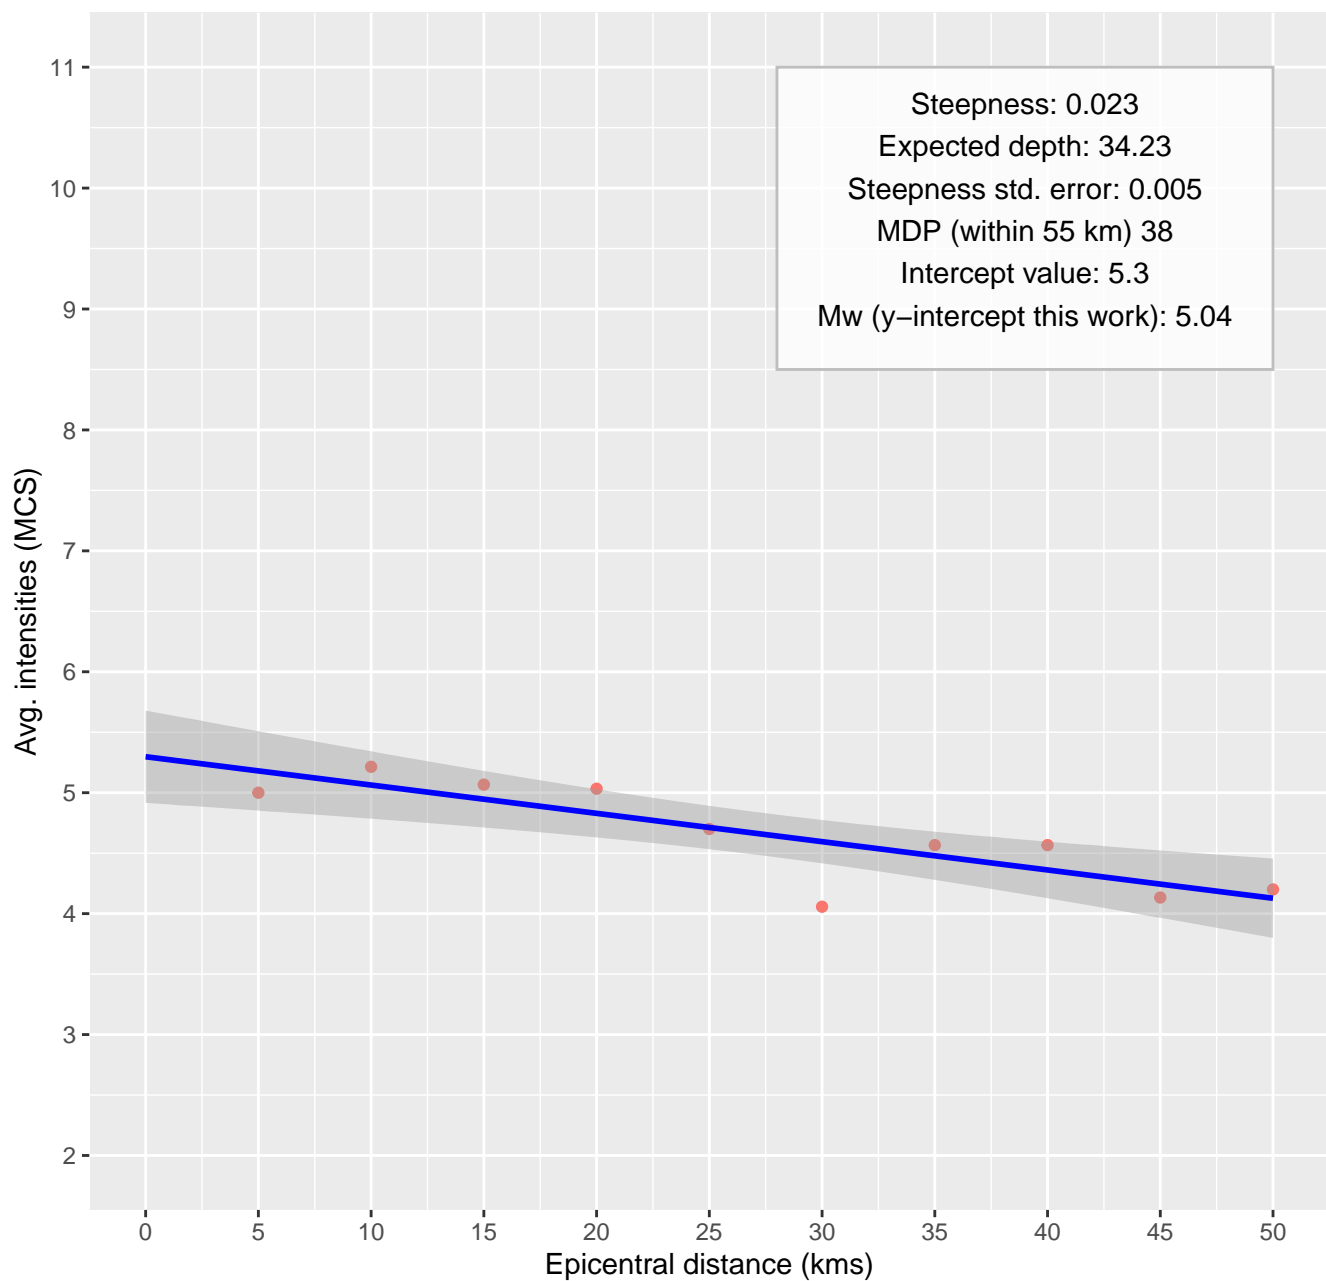

Supplement: Supplementary file 80 [file nhess-23-1007-2023-supplement.zip]

# DBMI\_ 18730312\_2004\_000 | 1873-03-12 – Appennino marchigiano

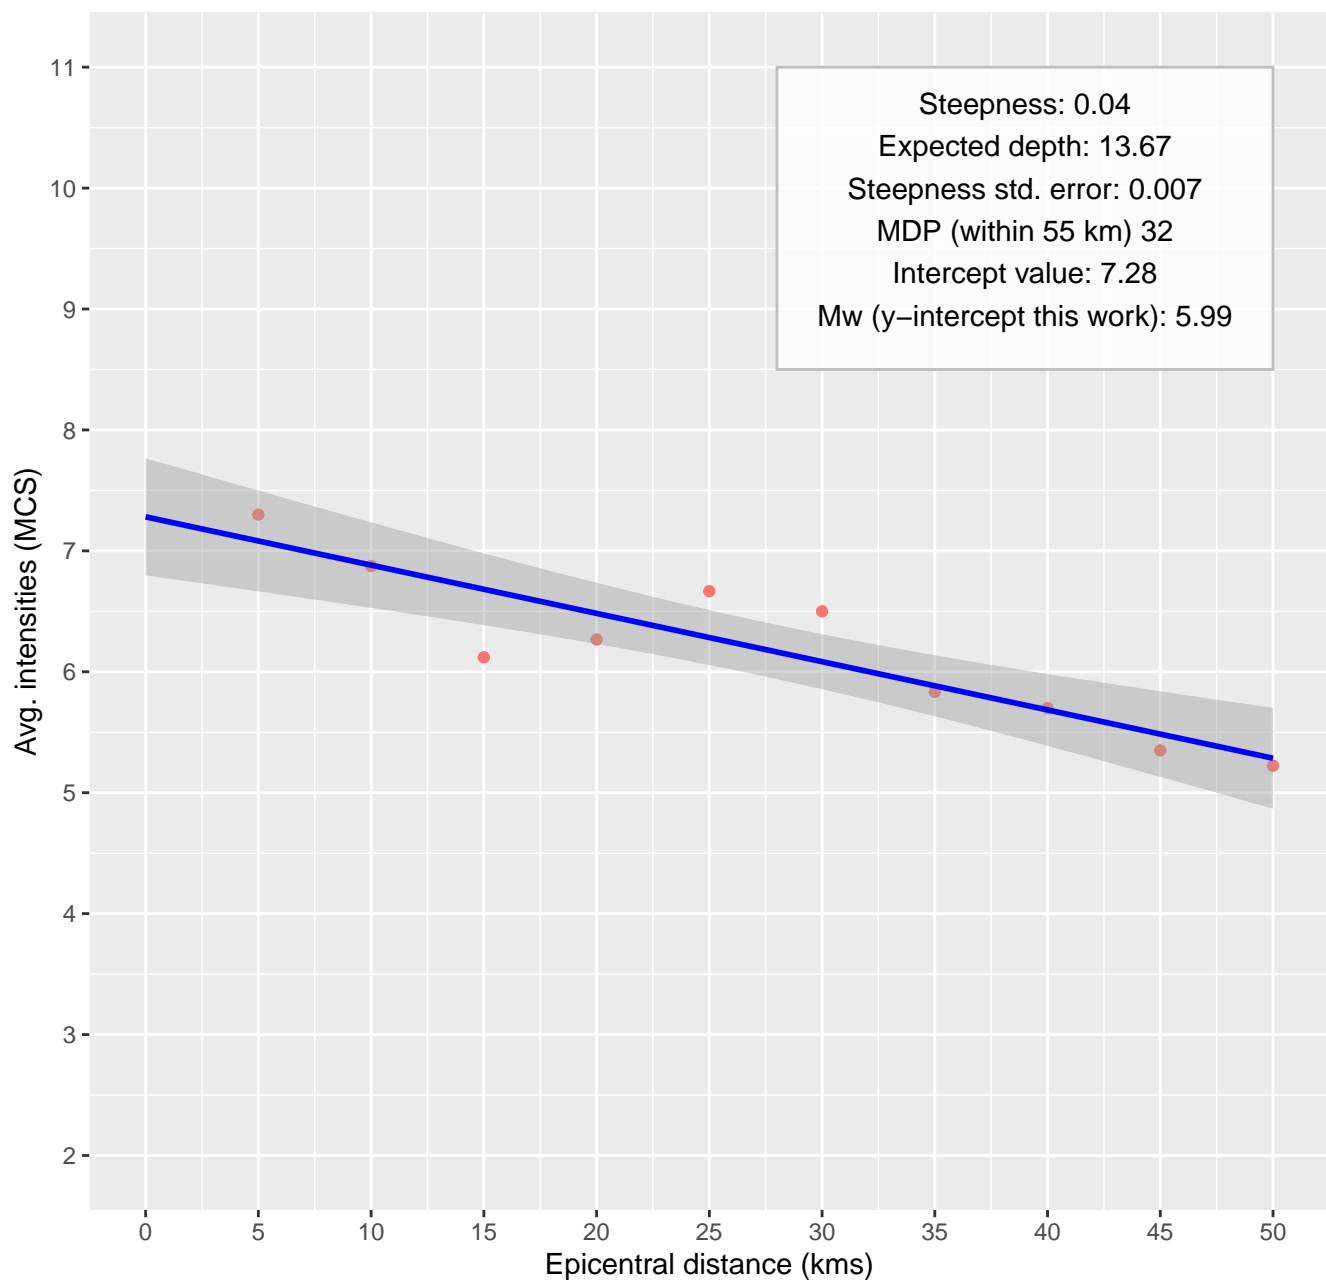

Supplement: Supplementary file 81 [file nhess-23-1007-2023-supplement.zip]

# DBMI\_ 19800105\_1432\_000 | 1980-01-05 – Torinese

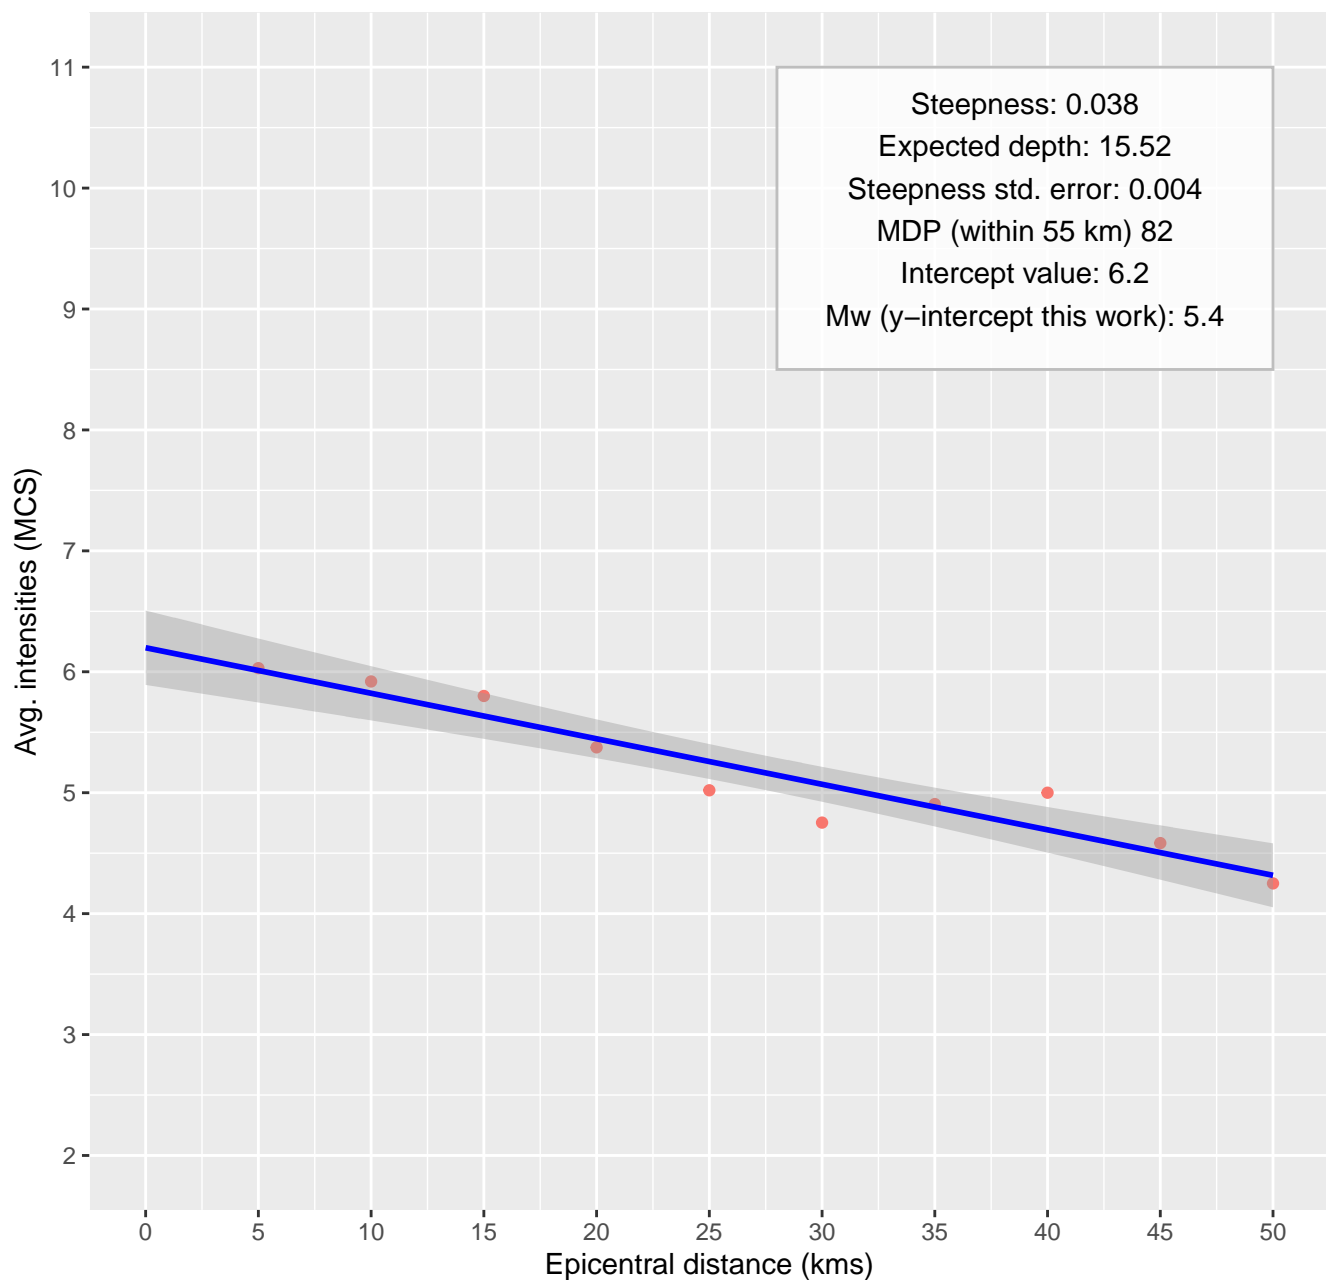

Supplement: Supplementary file 82 [file nhess-23-1007-2023-supplement.zip]

# DBMI\_ 19190910\_1657\_000 | 1919-09-10 – Val di Paglia

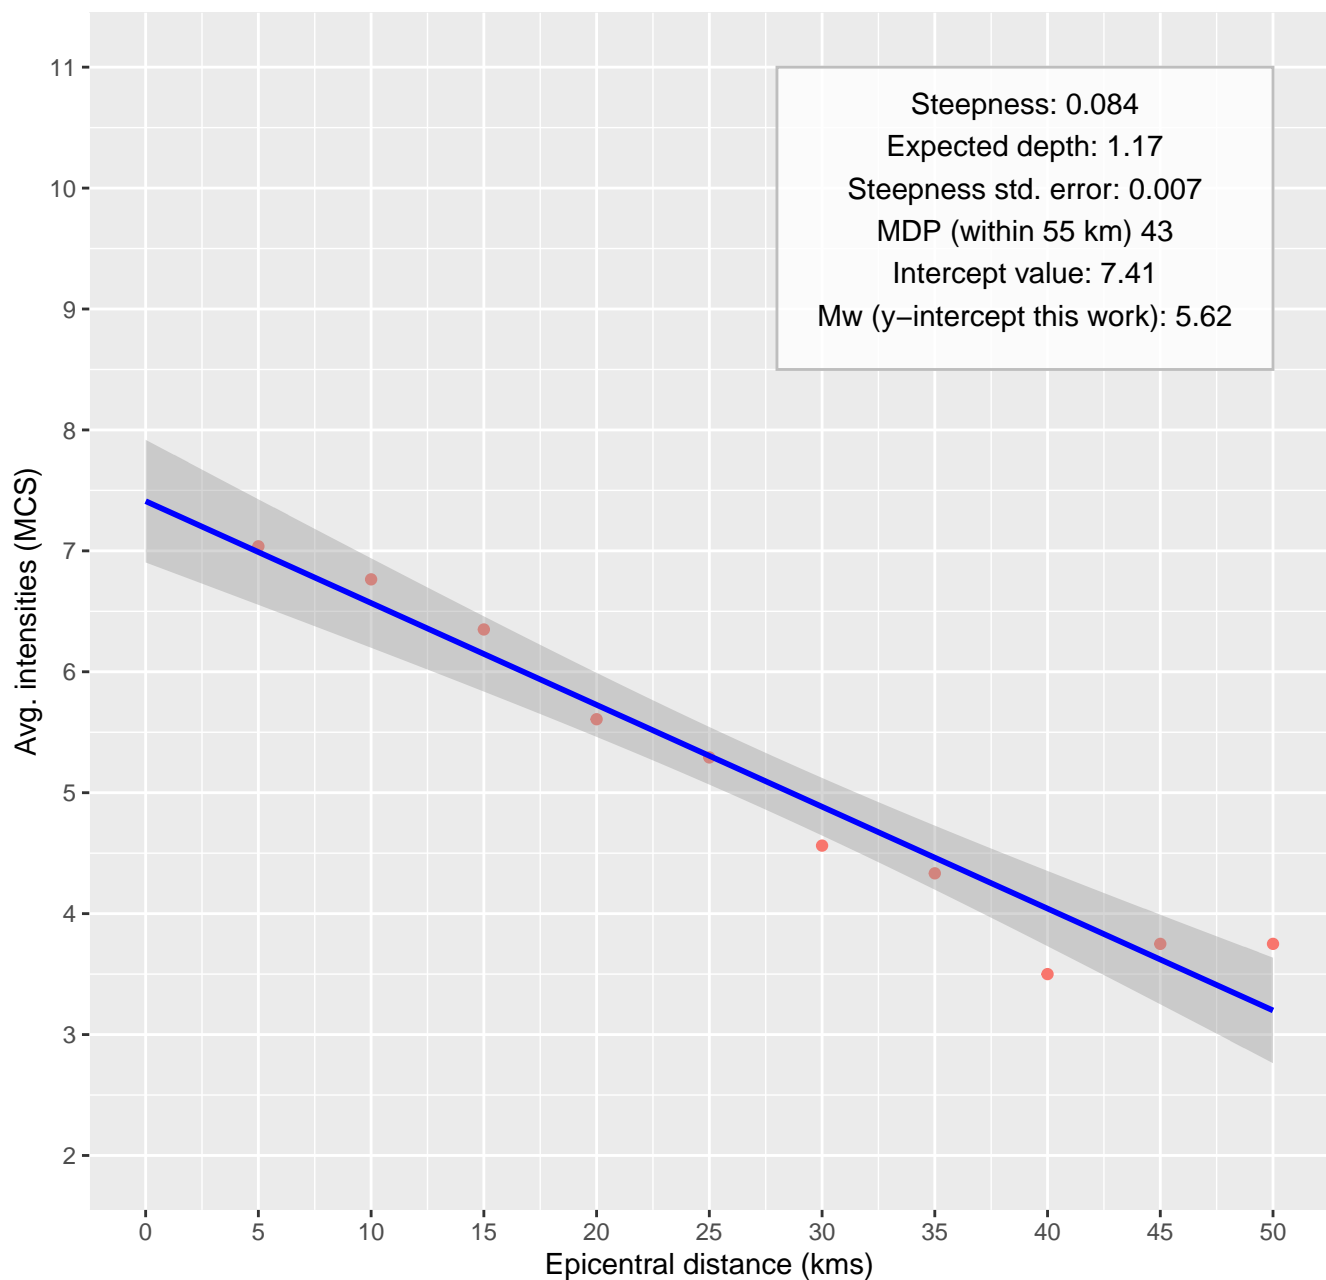

Supplement: Supplementary file 83 [file nhess-23-1007-2023-supplement.zip]

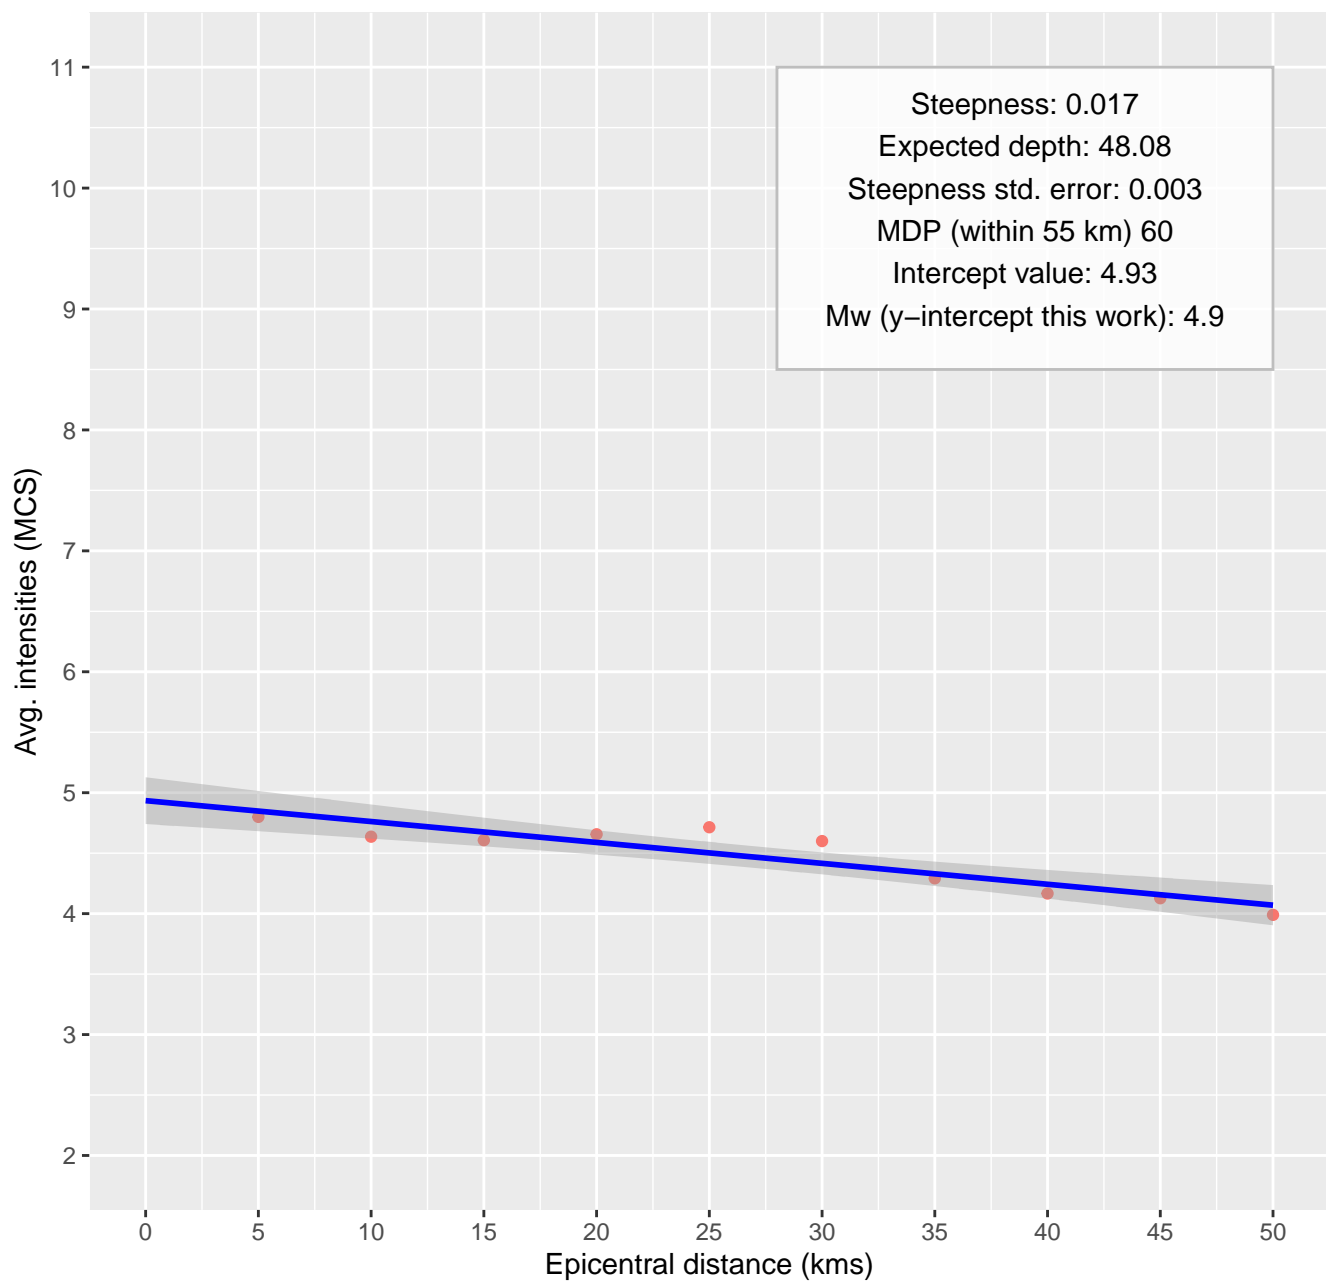

Supplement: Supplementary file 84 [file nhess-23-1007-2023-supplement.zip]

# DBMI\_ 19801202\_0558\_000 | 1980-12-02 – Bauges

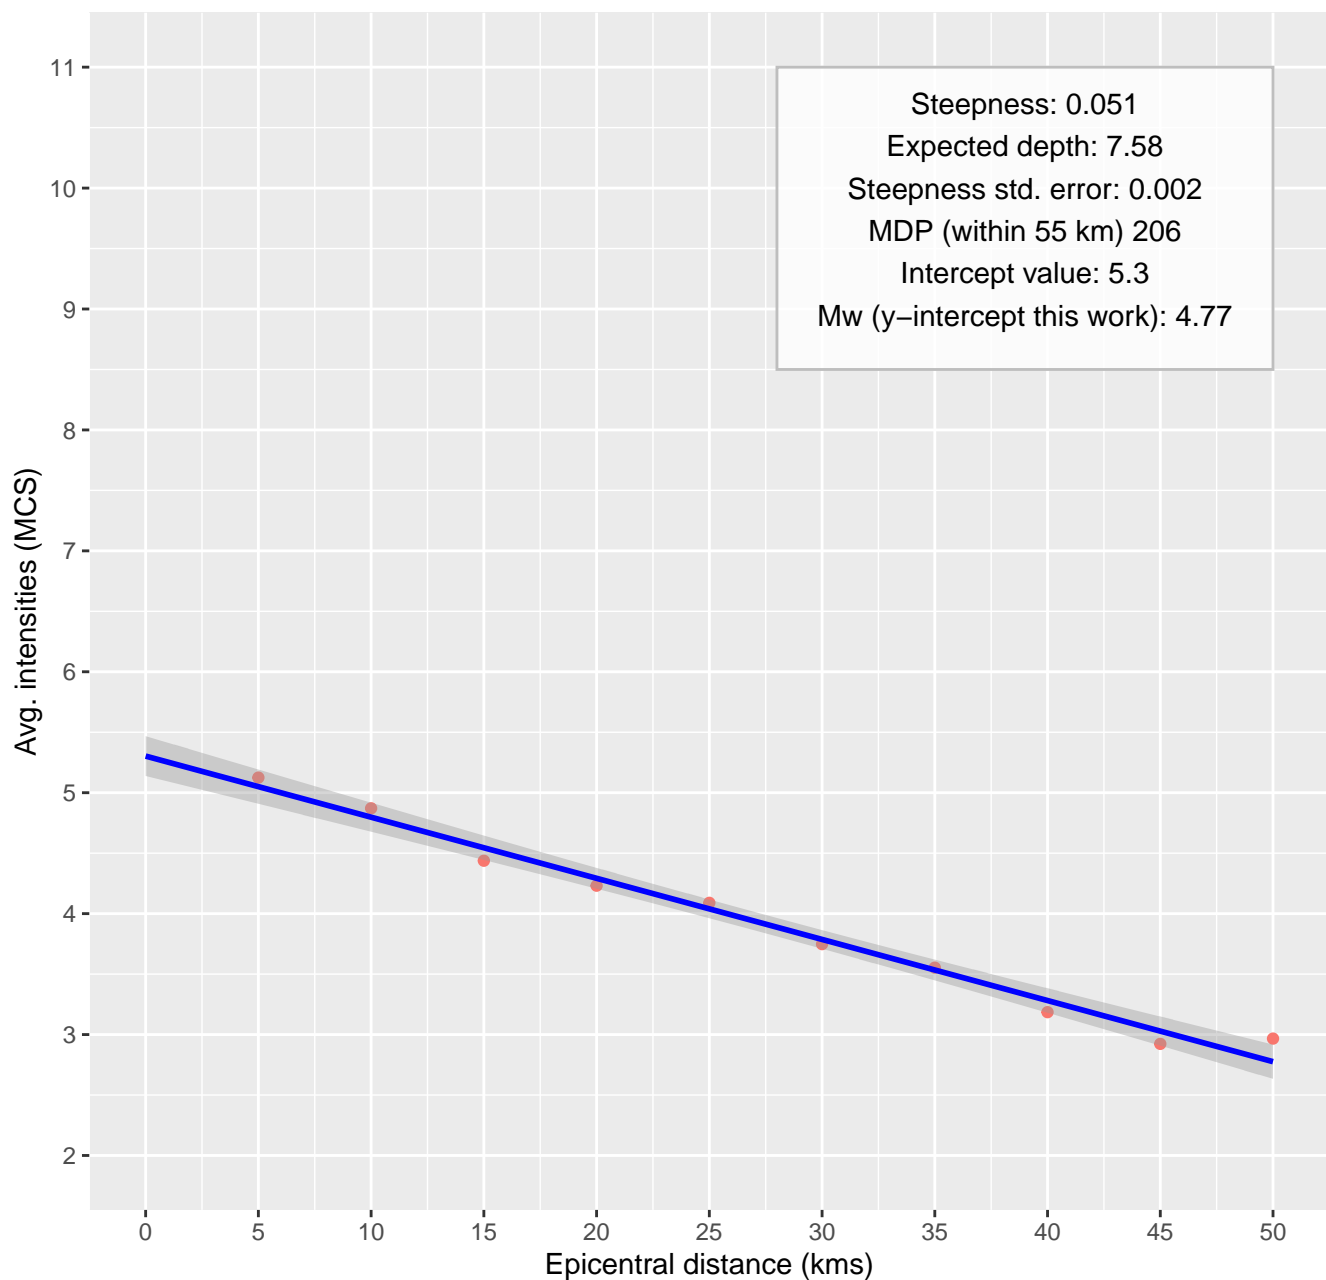

Supplement: Supplementary file 85 [file nhess-23-1007-2023-supplement.zip]

# DBMI\_ 15110326\_1440\_000 | 1511-03-26 – Friuli–Slovenia

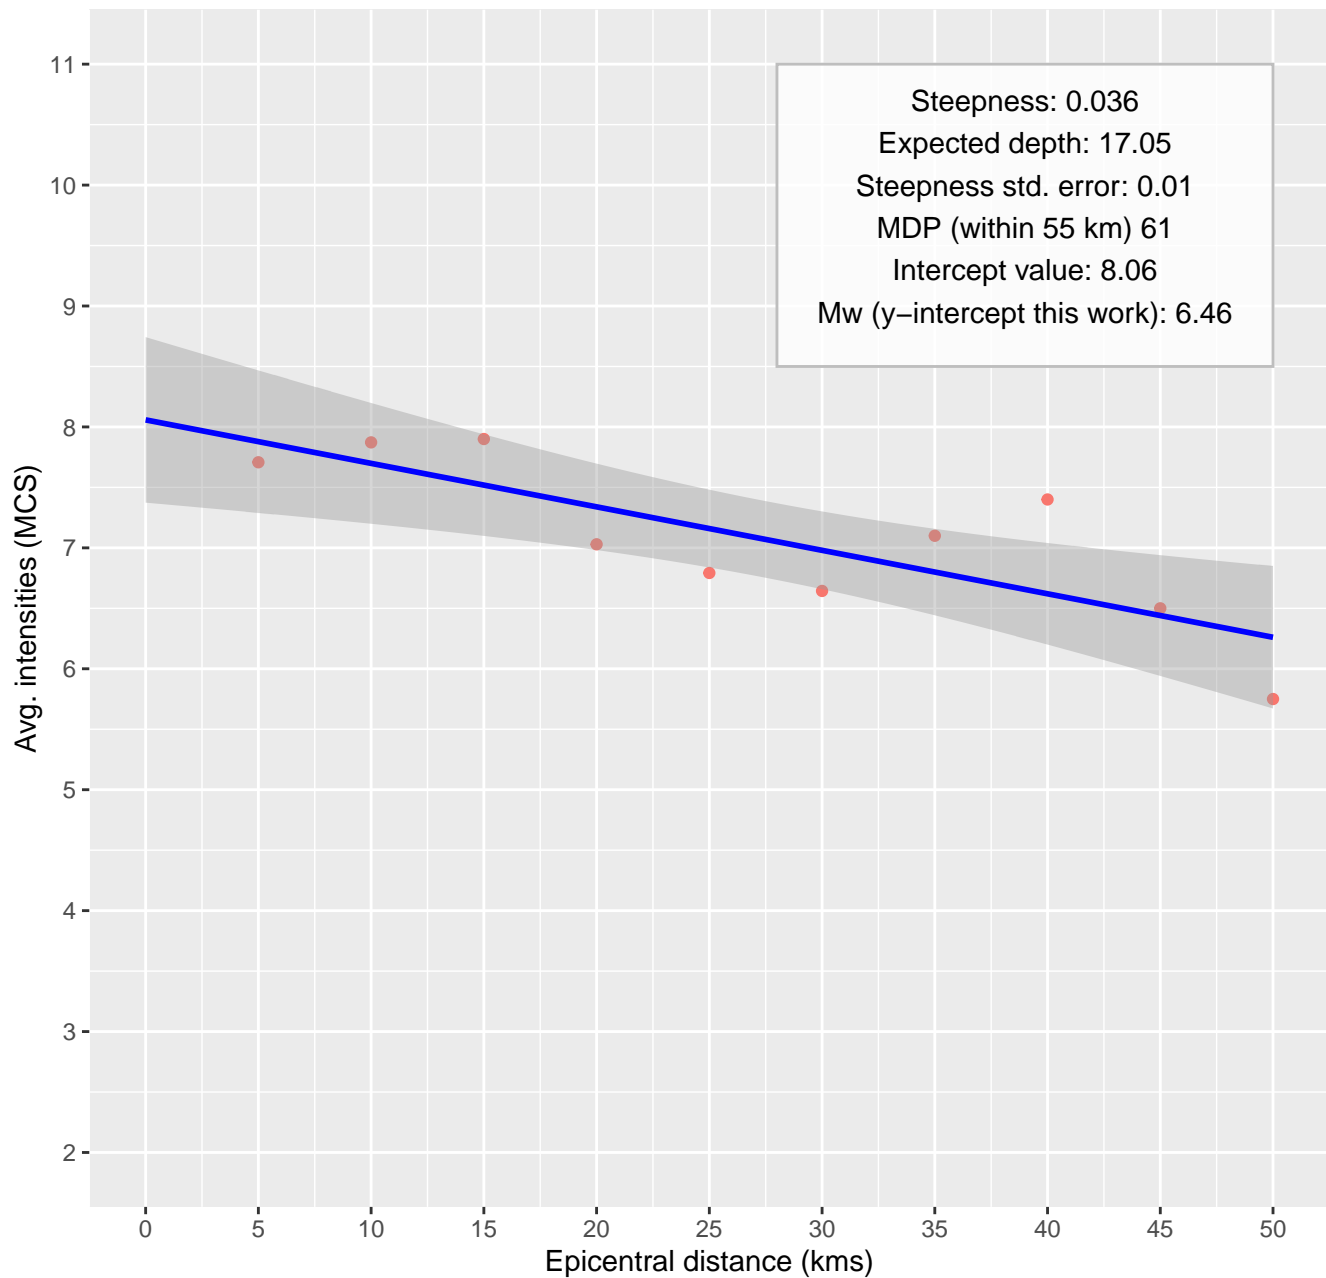

Supplement: Supplementary file 86 [file nhess-23-1007-2023-supplement.zip]

# DBMI\_ 19690811\_1355\_000 | 1969-08-11 – Lago Trasimeno

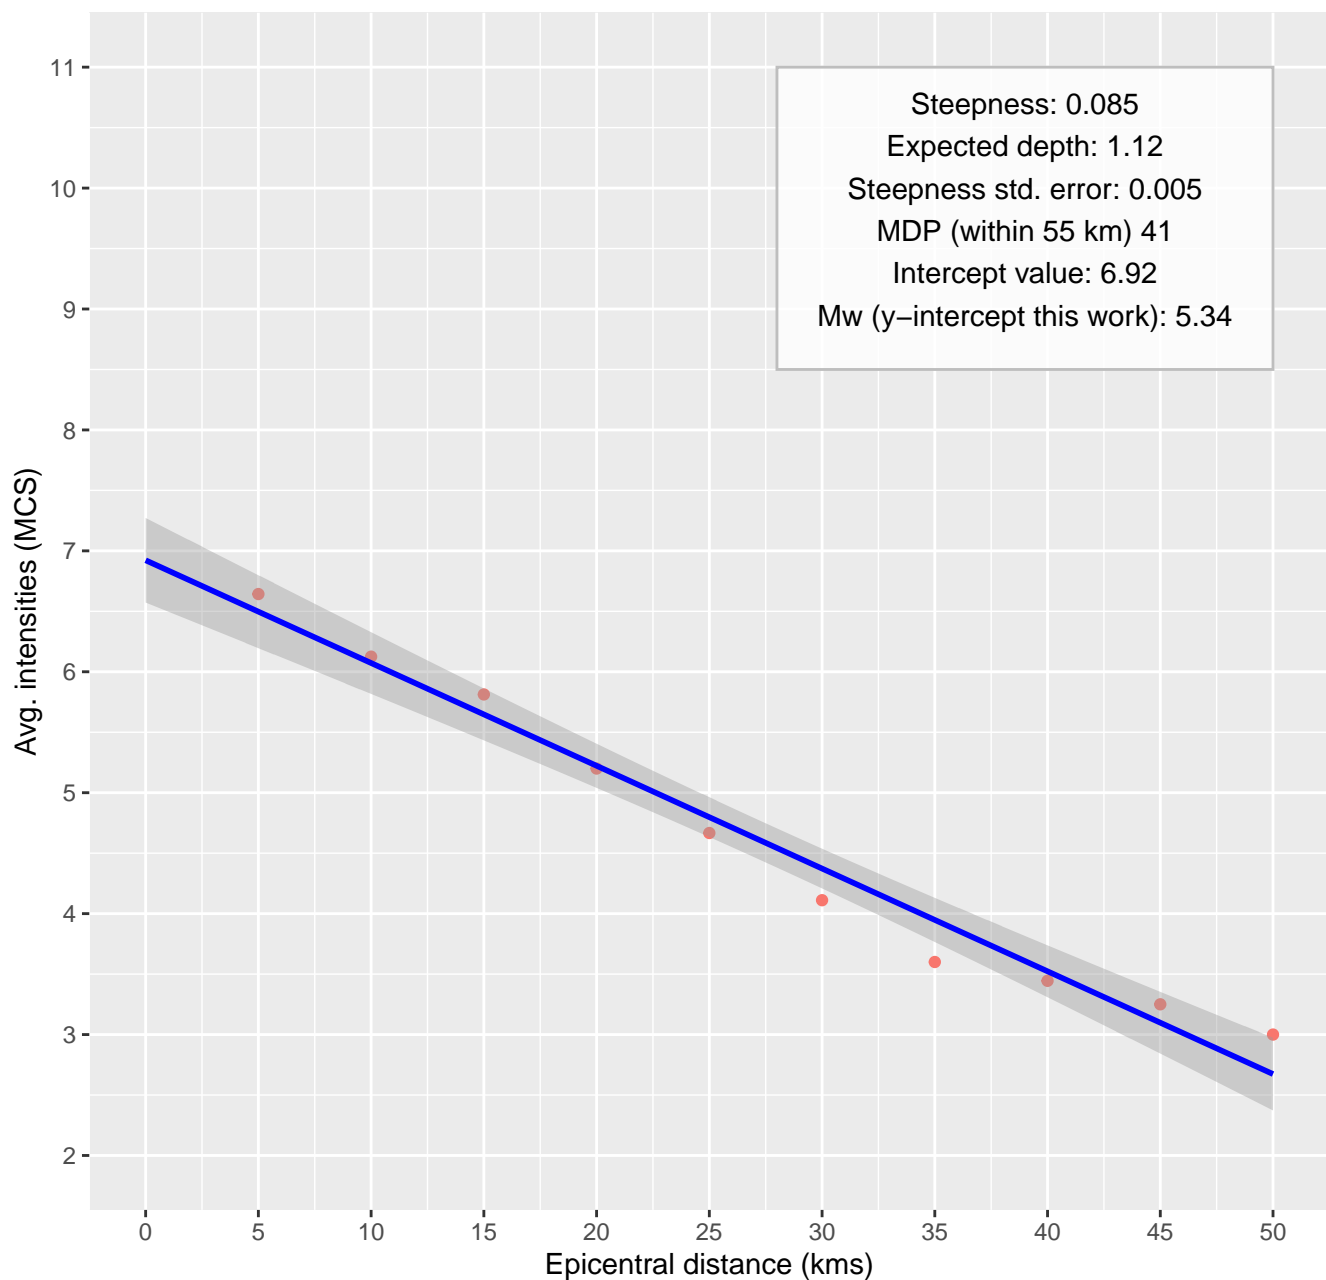

Supplement: Supplementary file 87 [file nhess-23-1007-2023-supplement.zip]

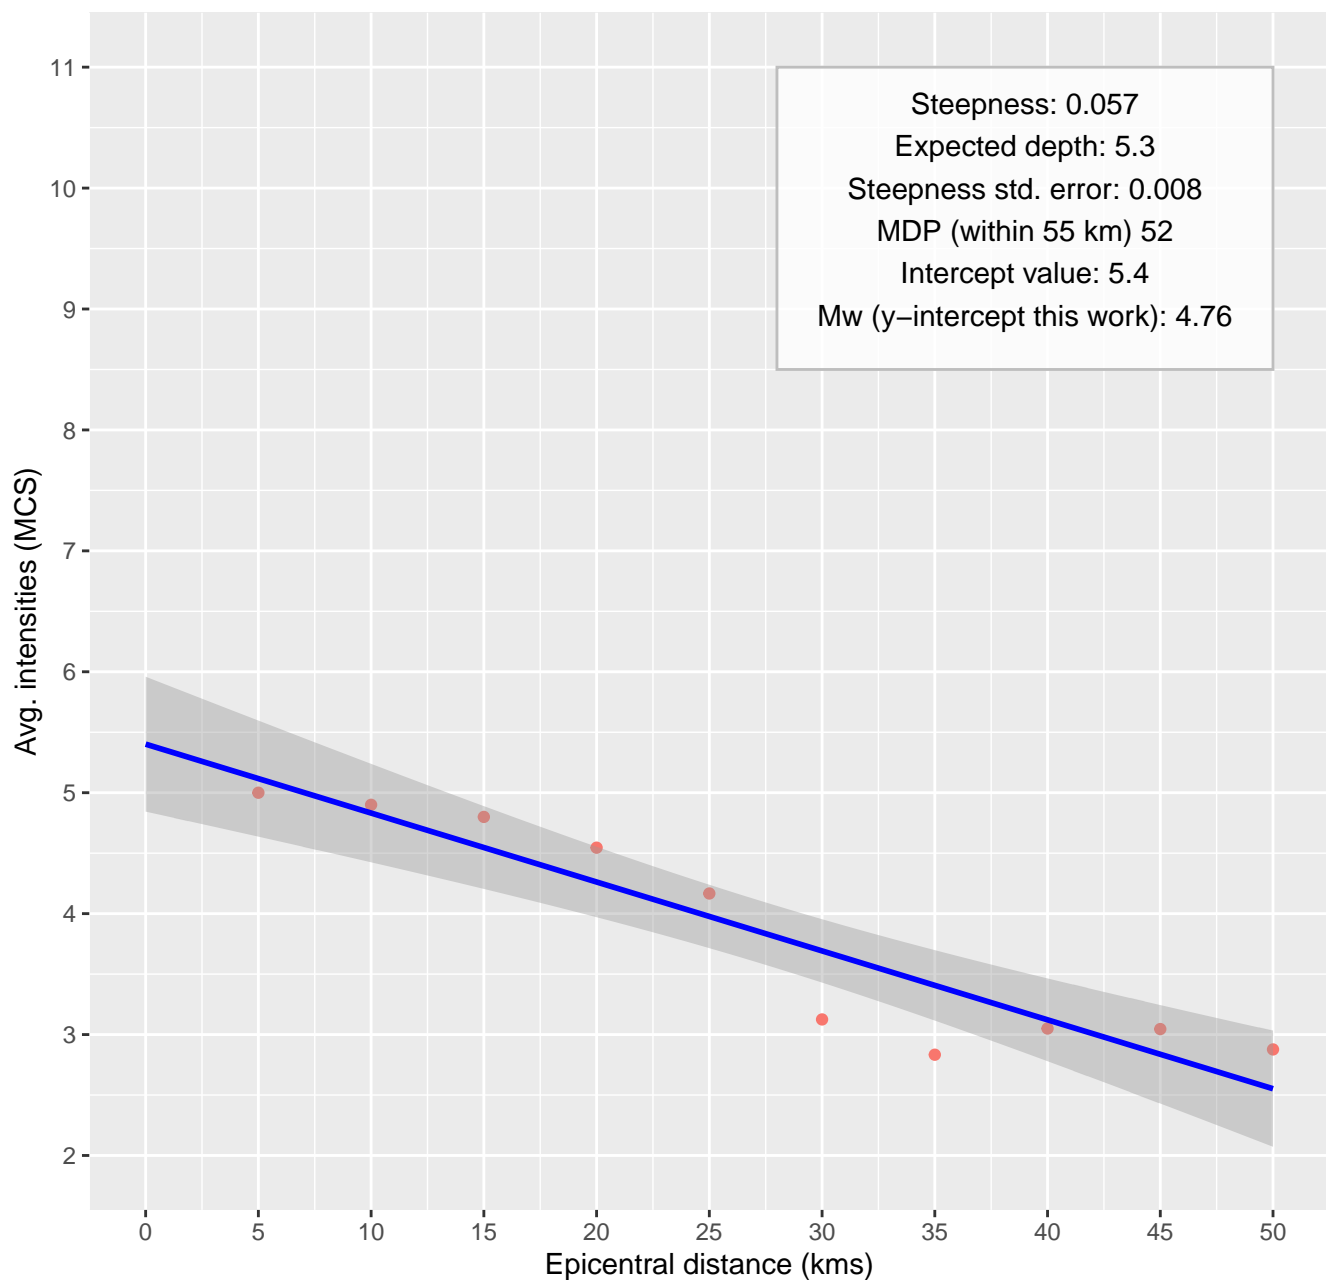

Supplement: Supplementary file 88 [file nhess-23-1007-2023-supplement.zip]

# DBMI\_ 19310414\_2213\_000 | 1931-04-14 – Valli Giudicarie

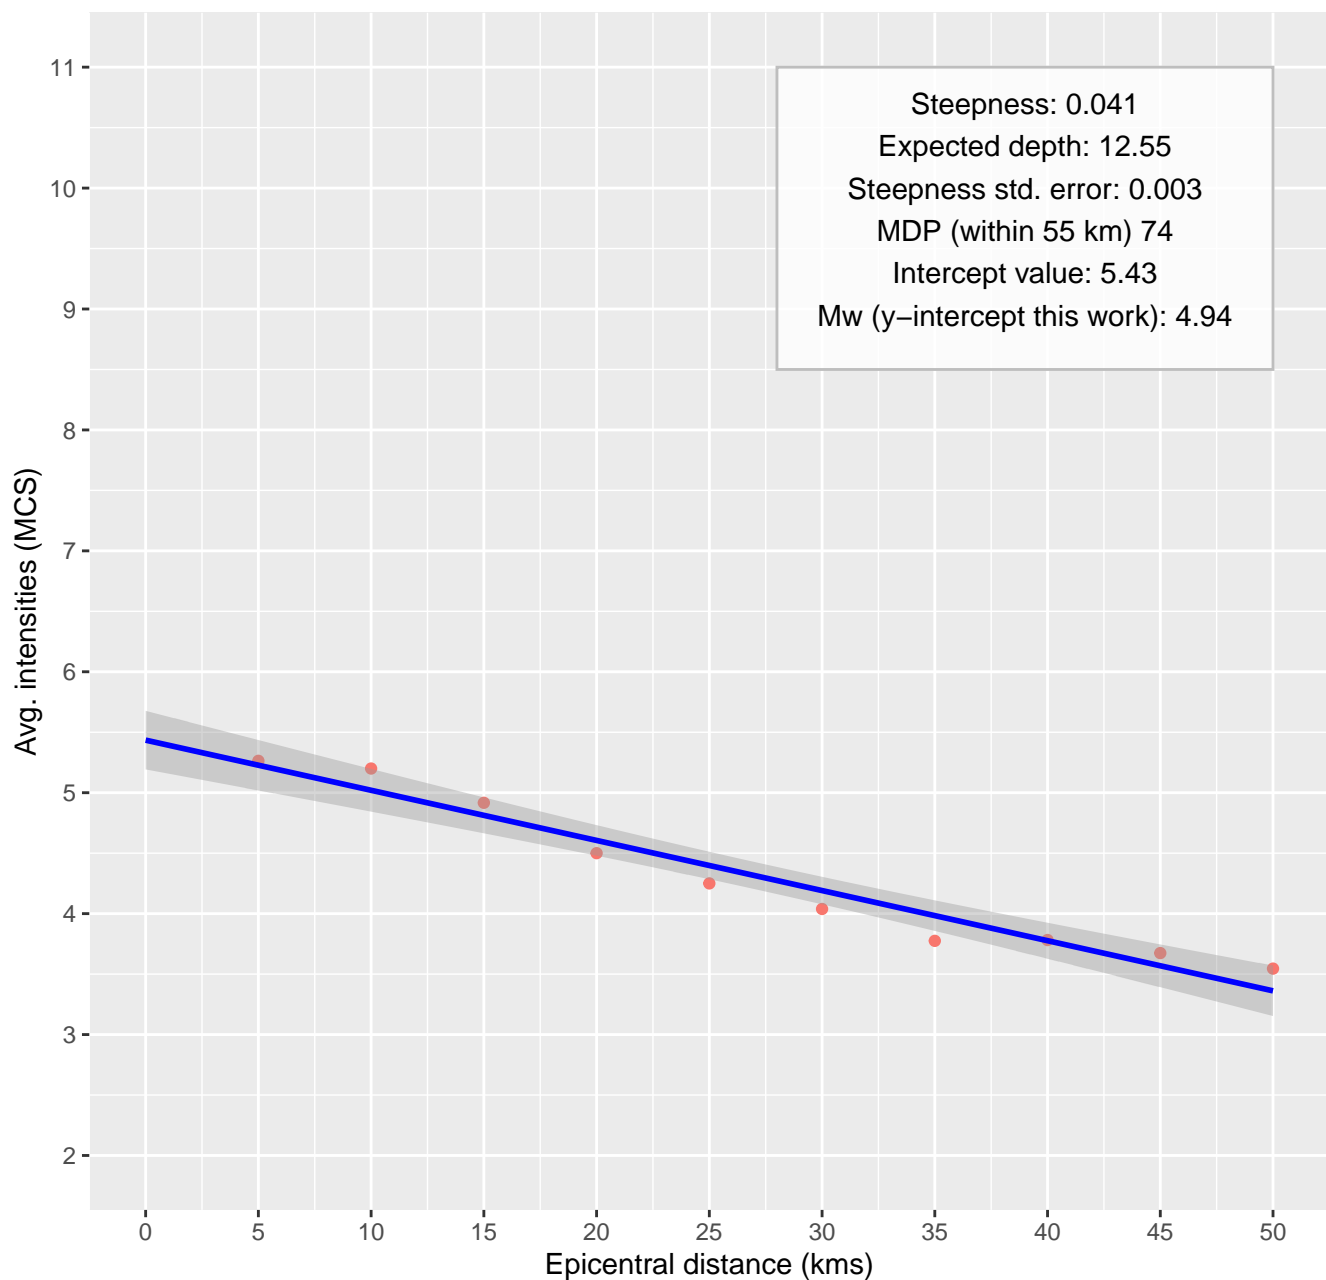

Supplement: Supplementary file 89 [file nhess-23-1007-2023-supplement.zip]

# DBMI\_ 19680125\_0956\_000 | 1968-01-25 – Valle del Belice

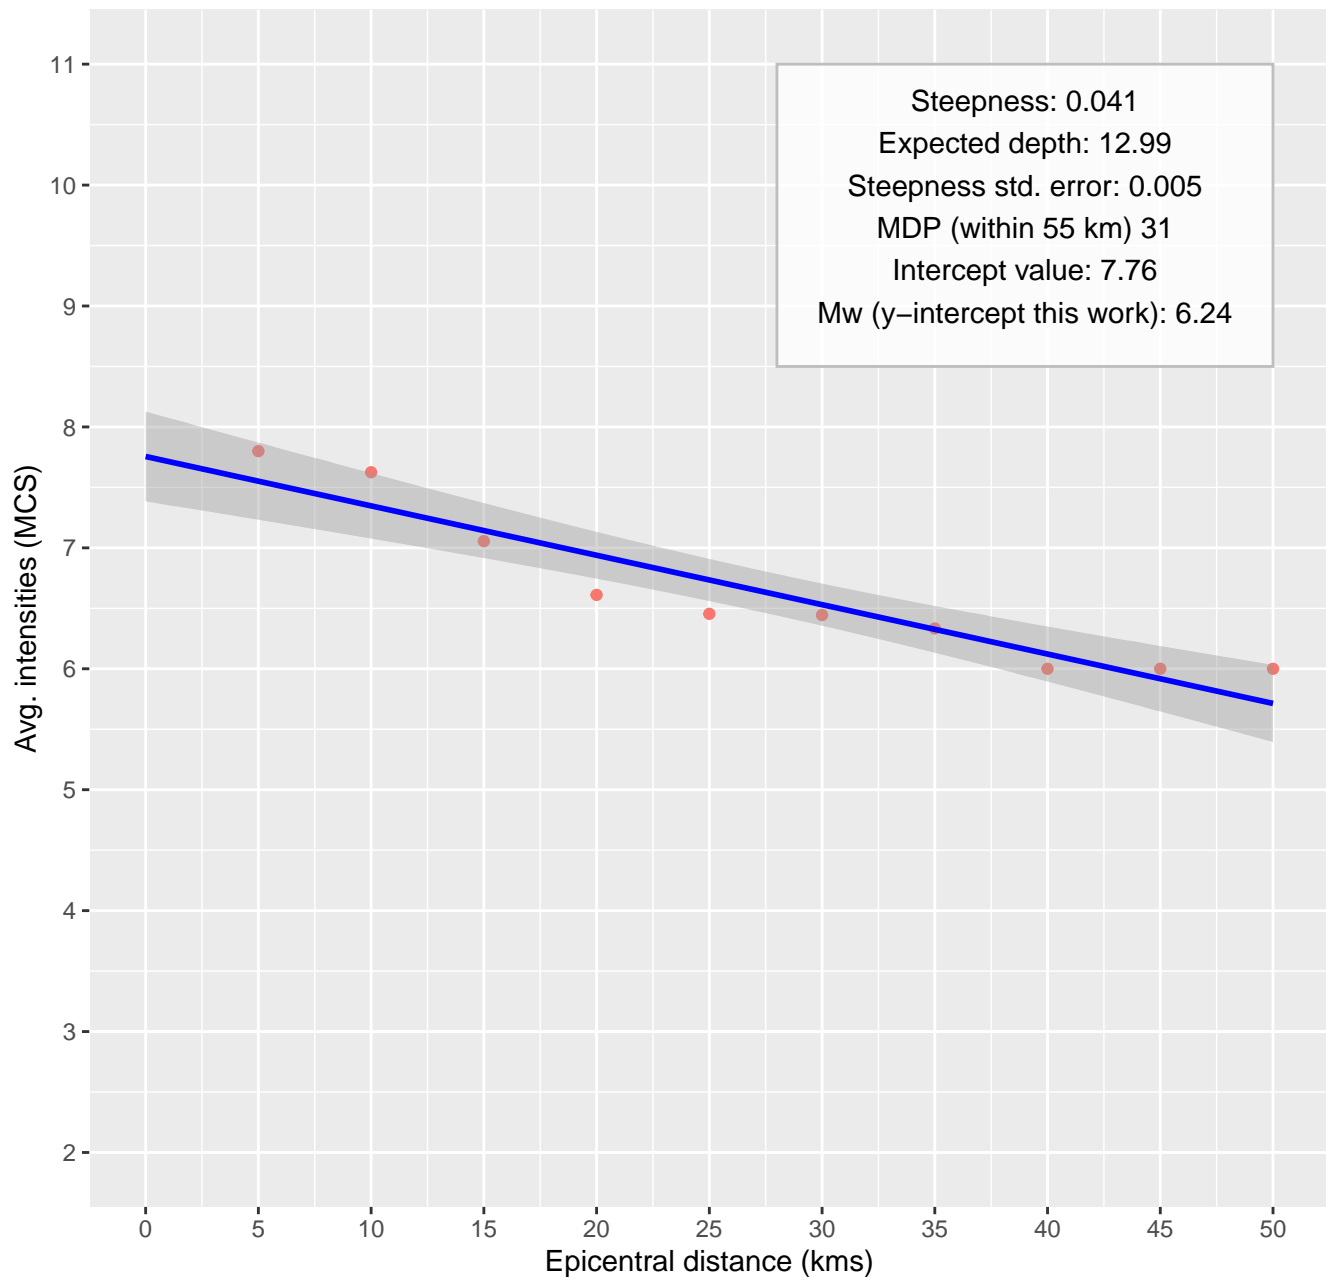

Supplement: Supplementary file 90 [file nhess-23-1007-2023-supplement.zip]

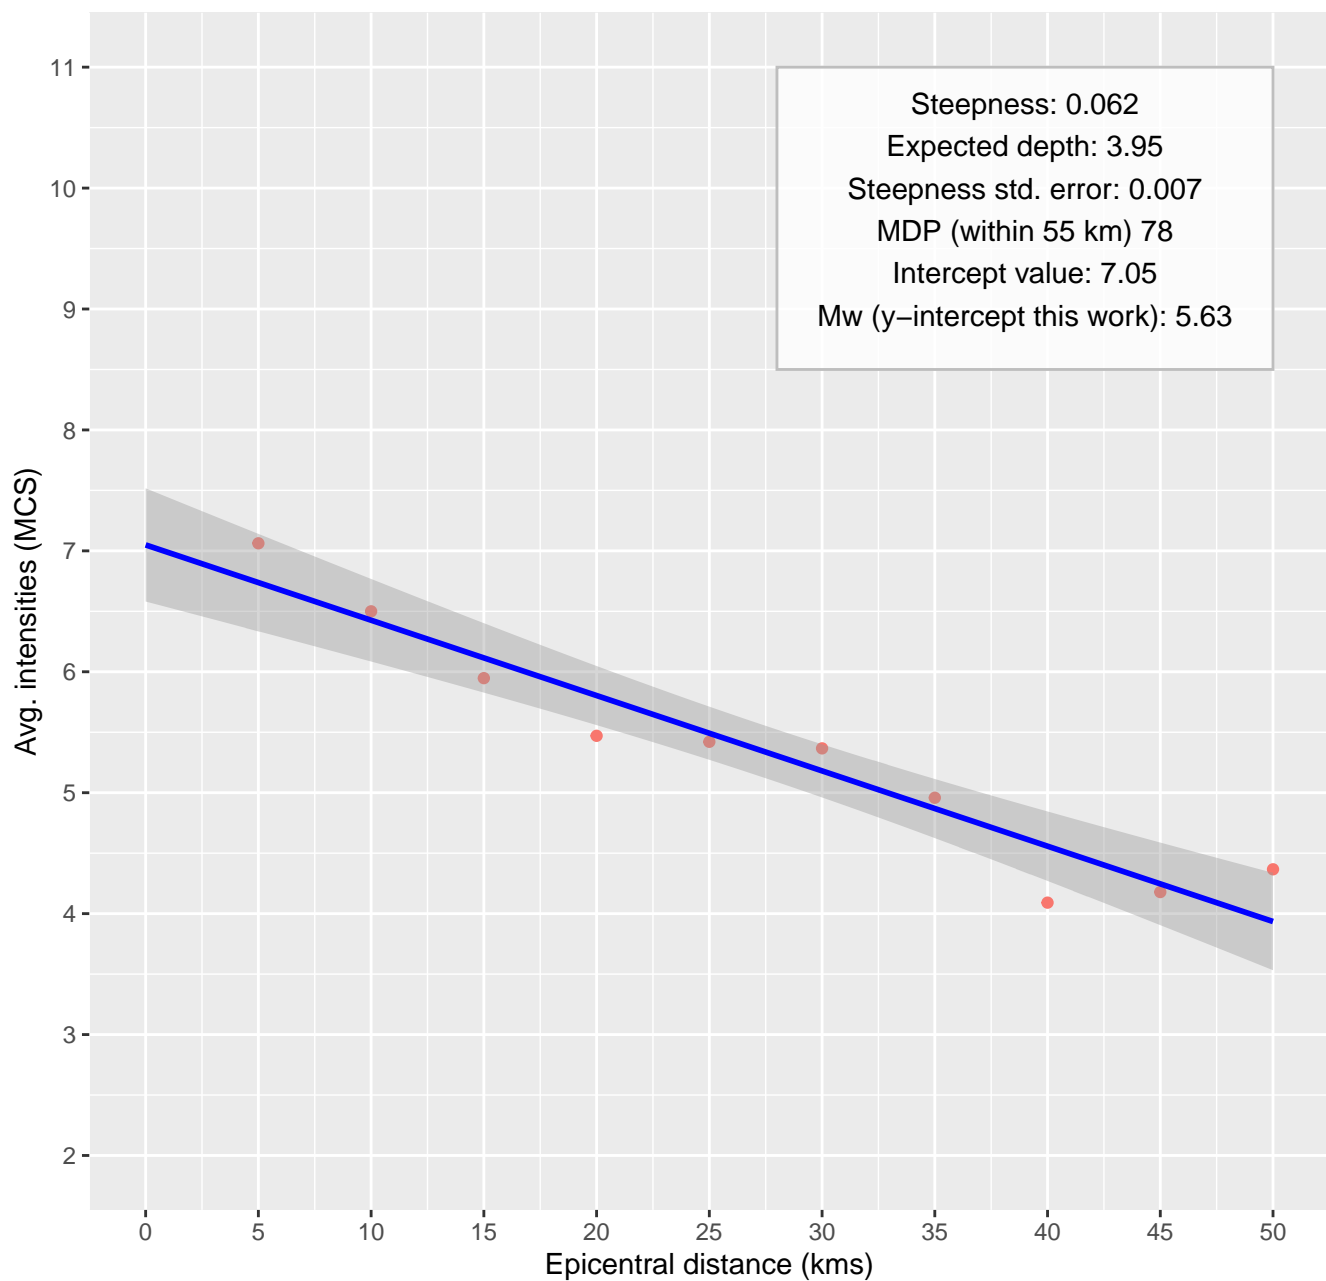

Supplement: Supplementary file 91 [file nhess-23-1007-2023-supplement.zip]

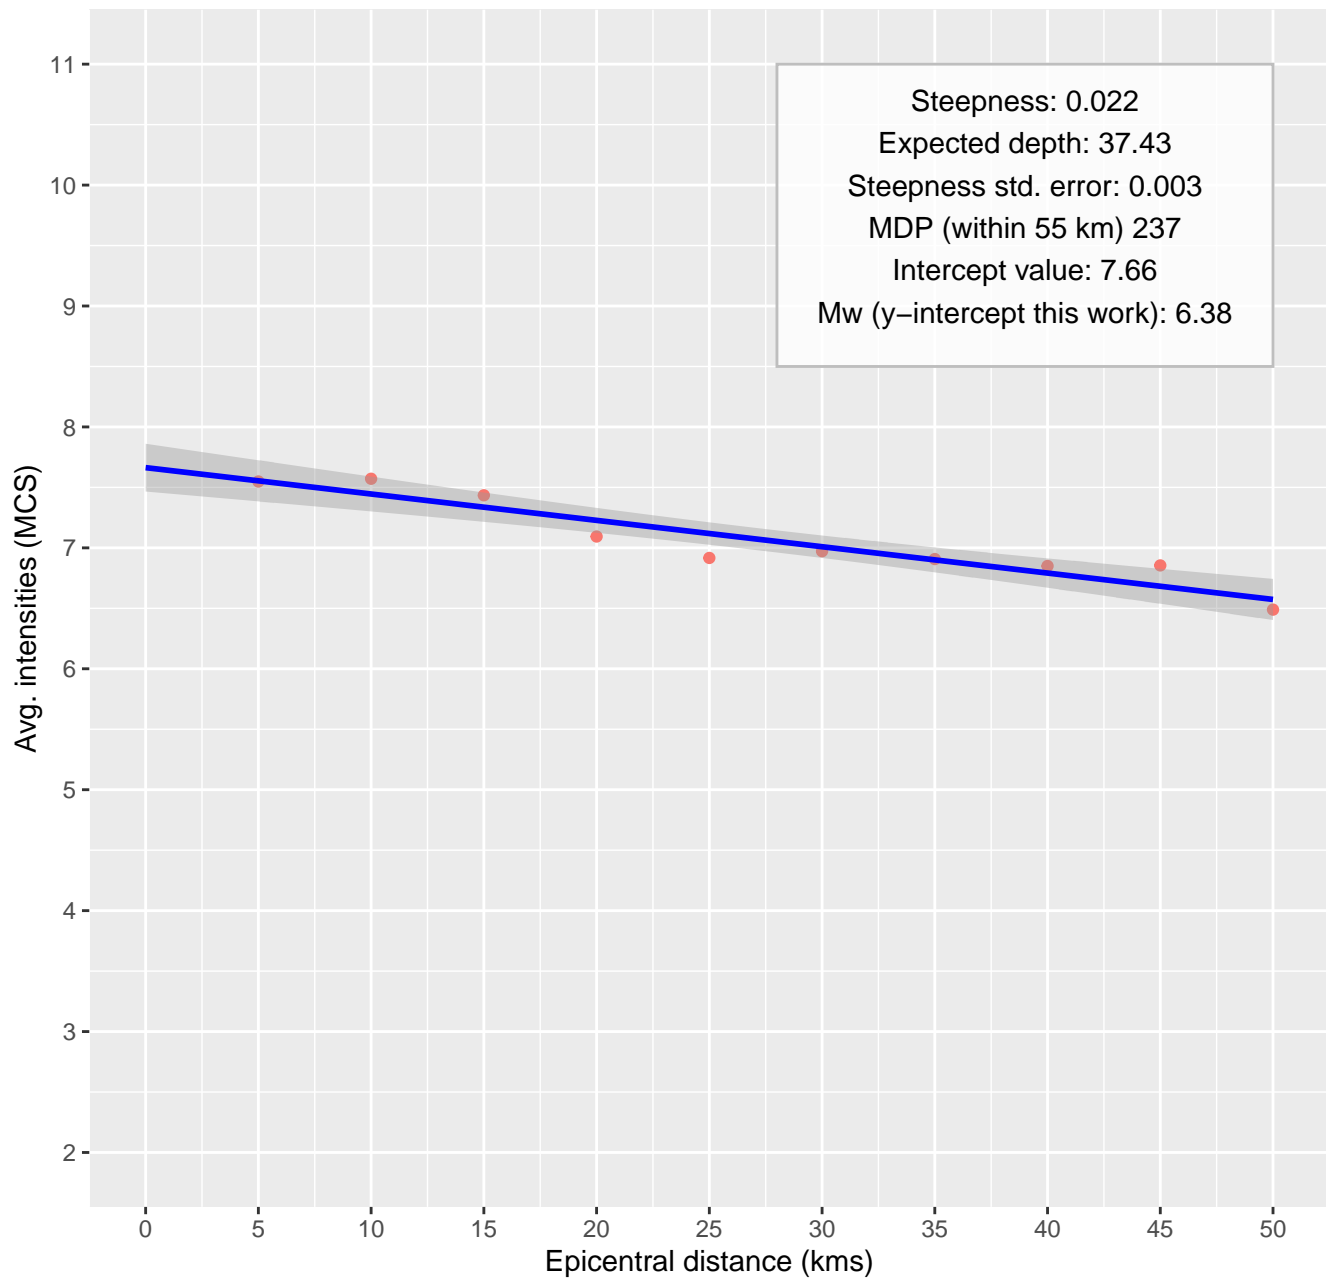

Supplement: Supplementary file 92 [file nhess-23-1007-2023-supplement.zip]

# DBMI\_ 19680418\_1938\_000 | 1968-04-18 – Liguria occidentale

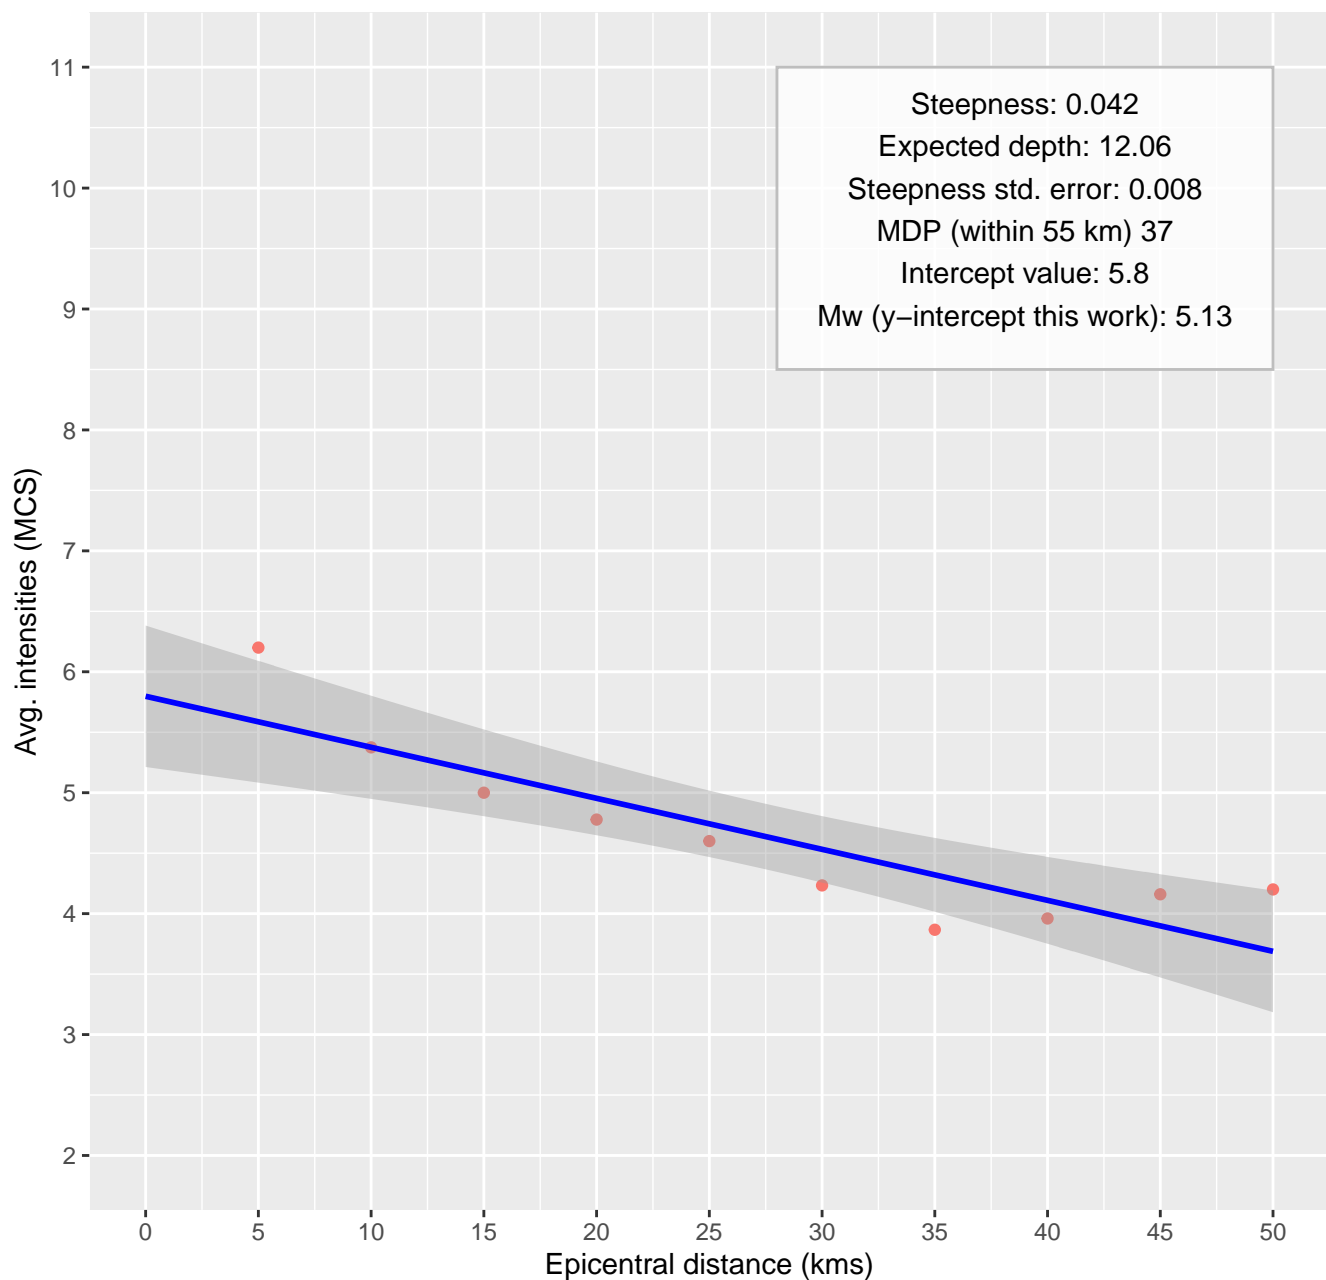

Supplement: Supplementary file 93 [file nhess-23-1007-2023-supplement.zip]

# DBMI\_ 19020804\_2236\_000 | 1902-08-04 – Lunigiana

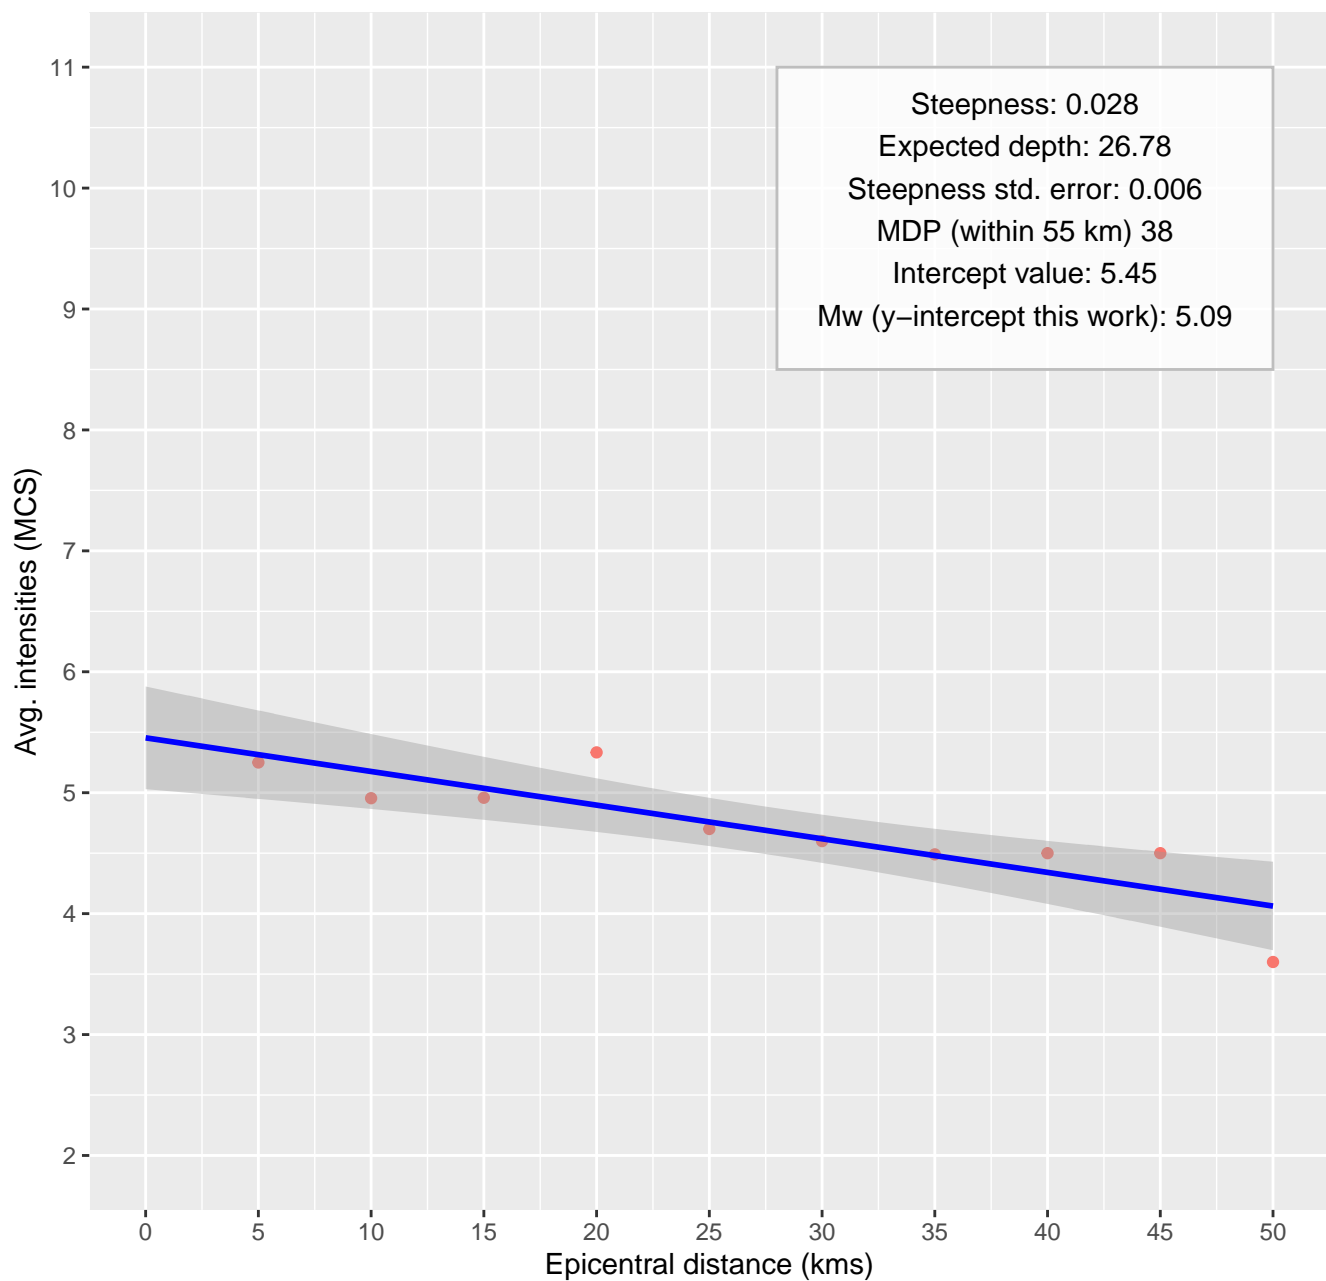

Supplement: Supplementary file 94 [file nhess-23-1007-2023-supplement.zip]

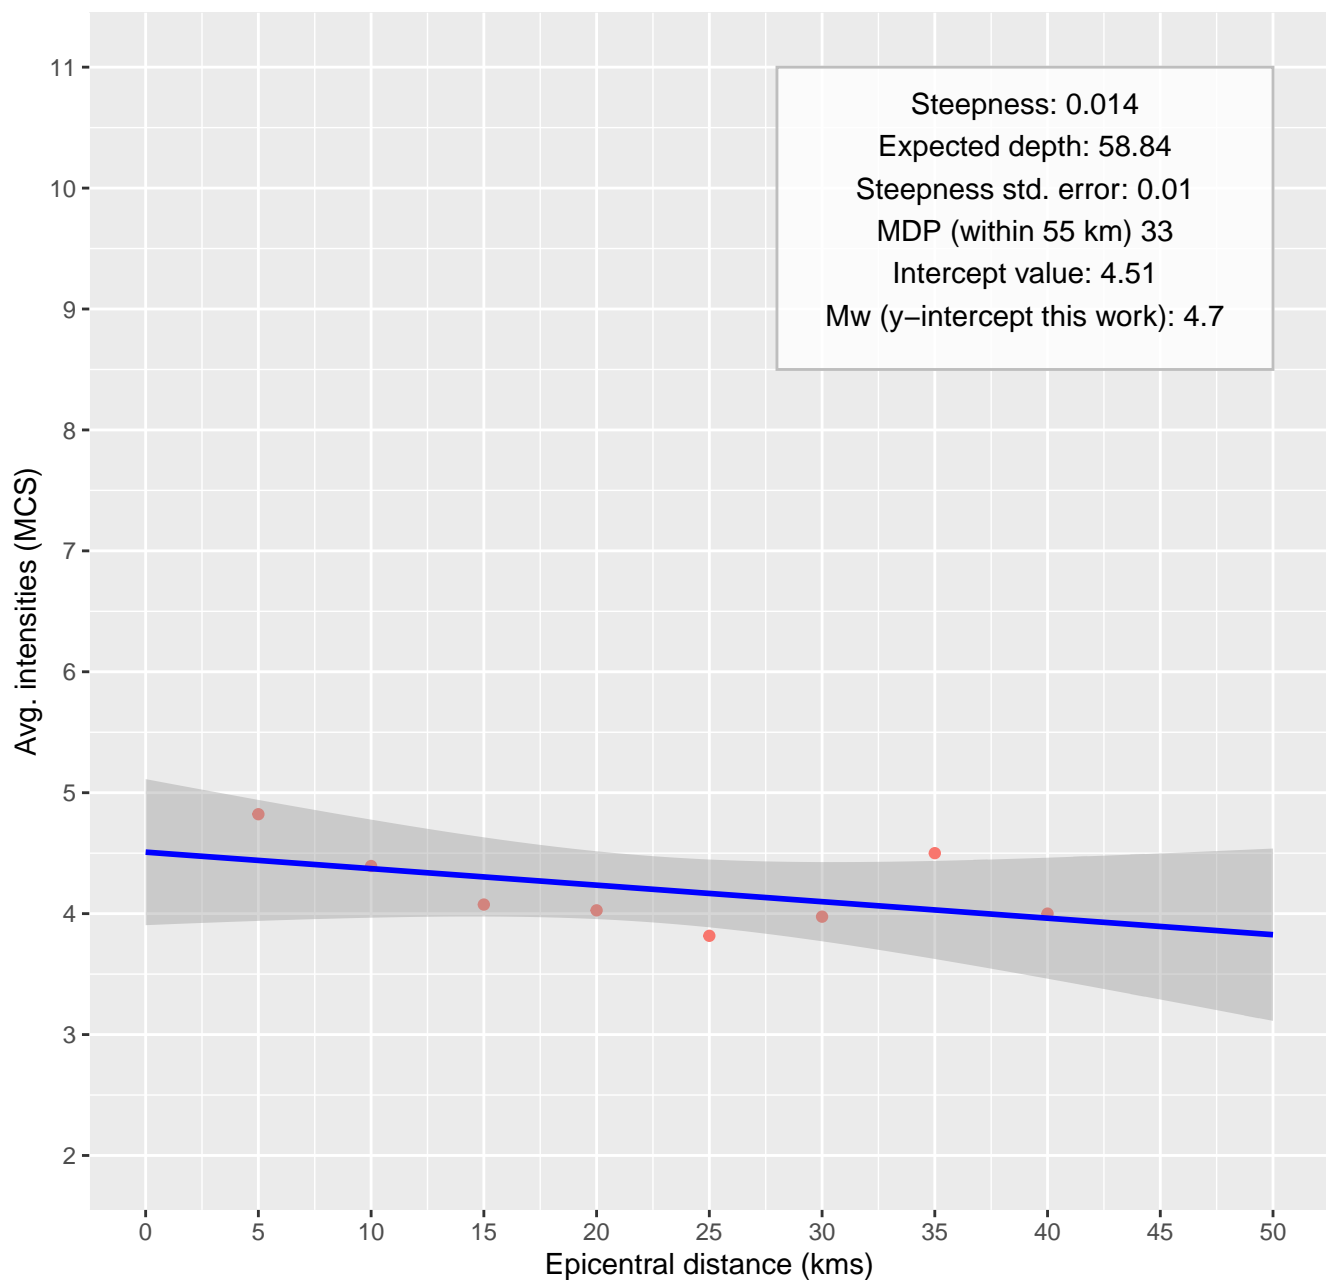

Supplement: Supplementary file 95 [file nhess-23-1007-2023-supplement.zip]

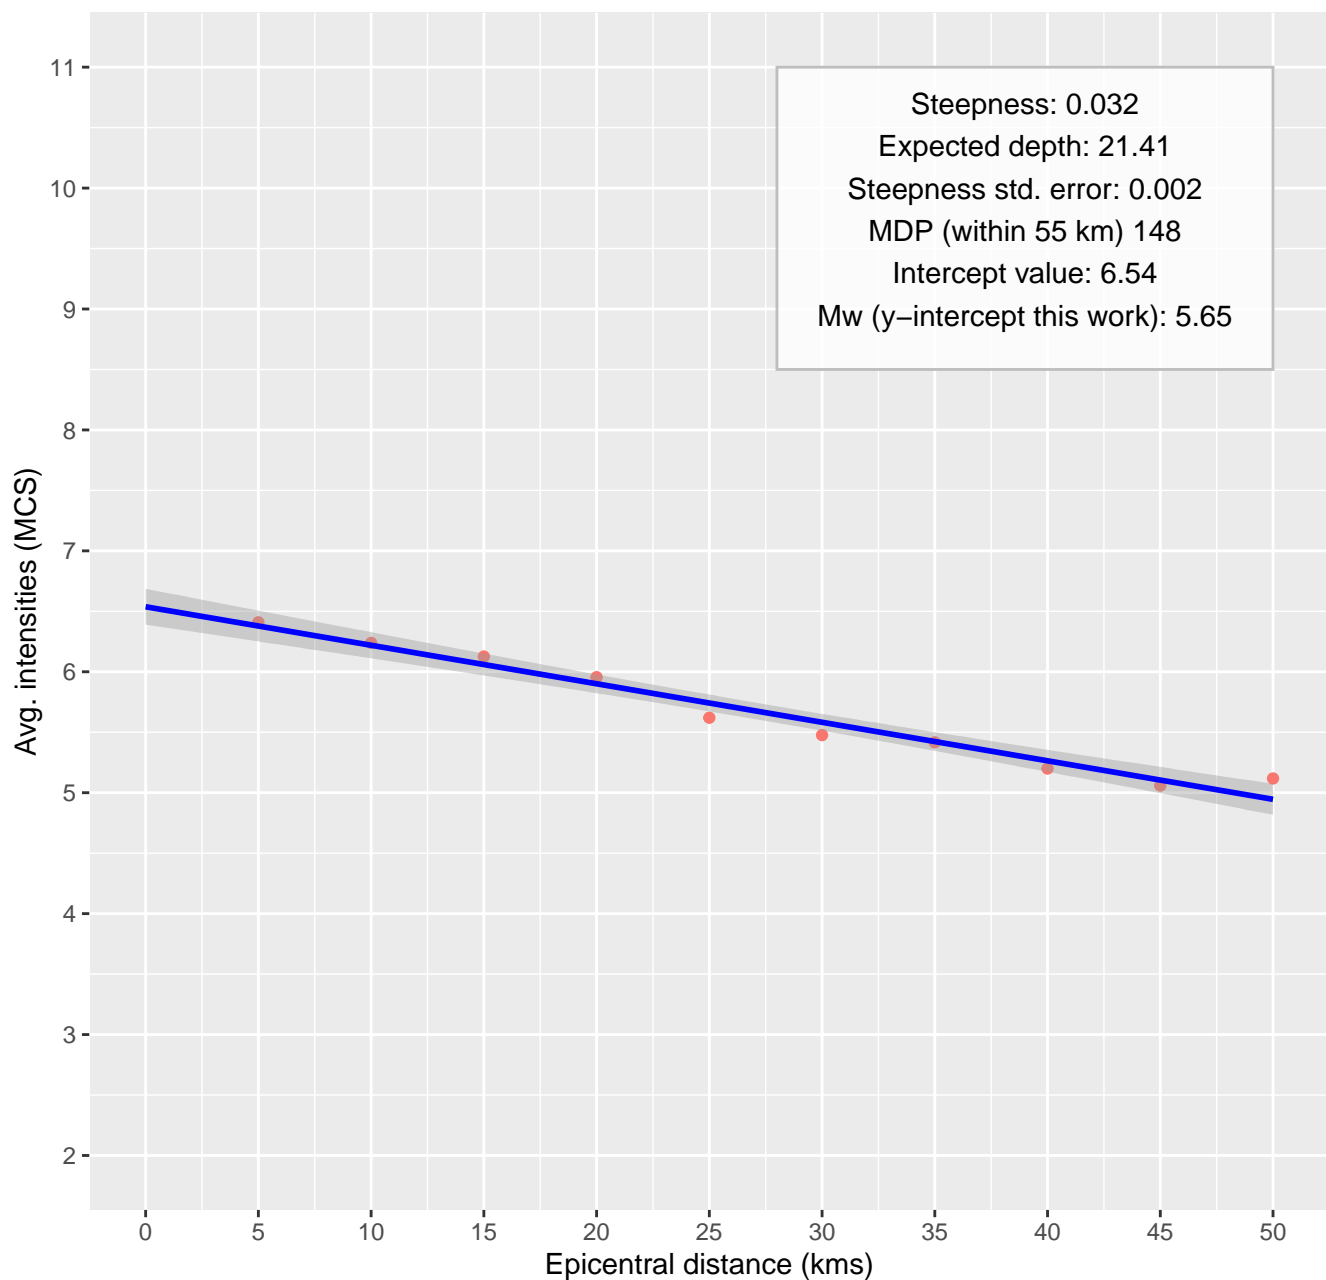

Supplement: Supplementary file 96 [file nhess-23-1007-2023-supplement.zip]

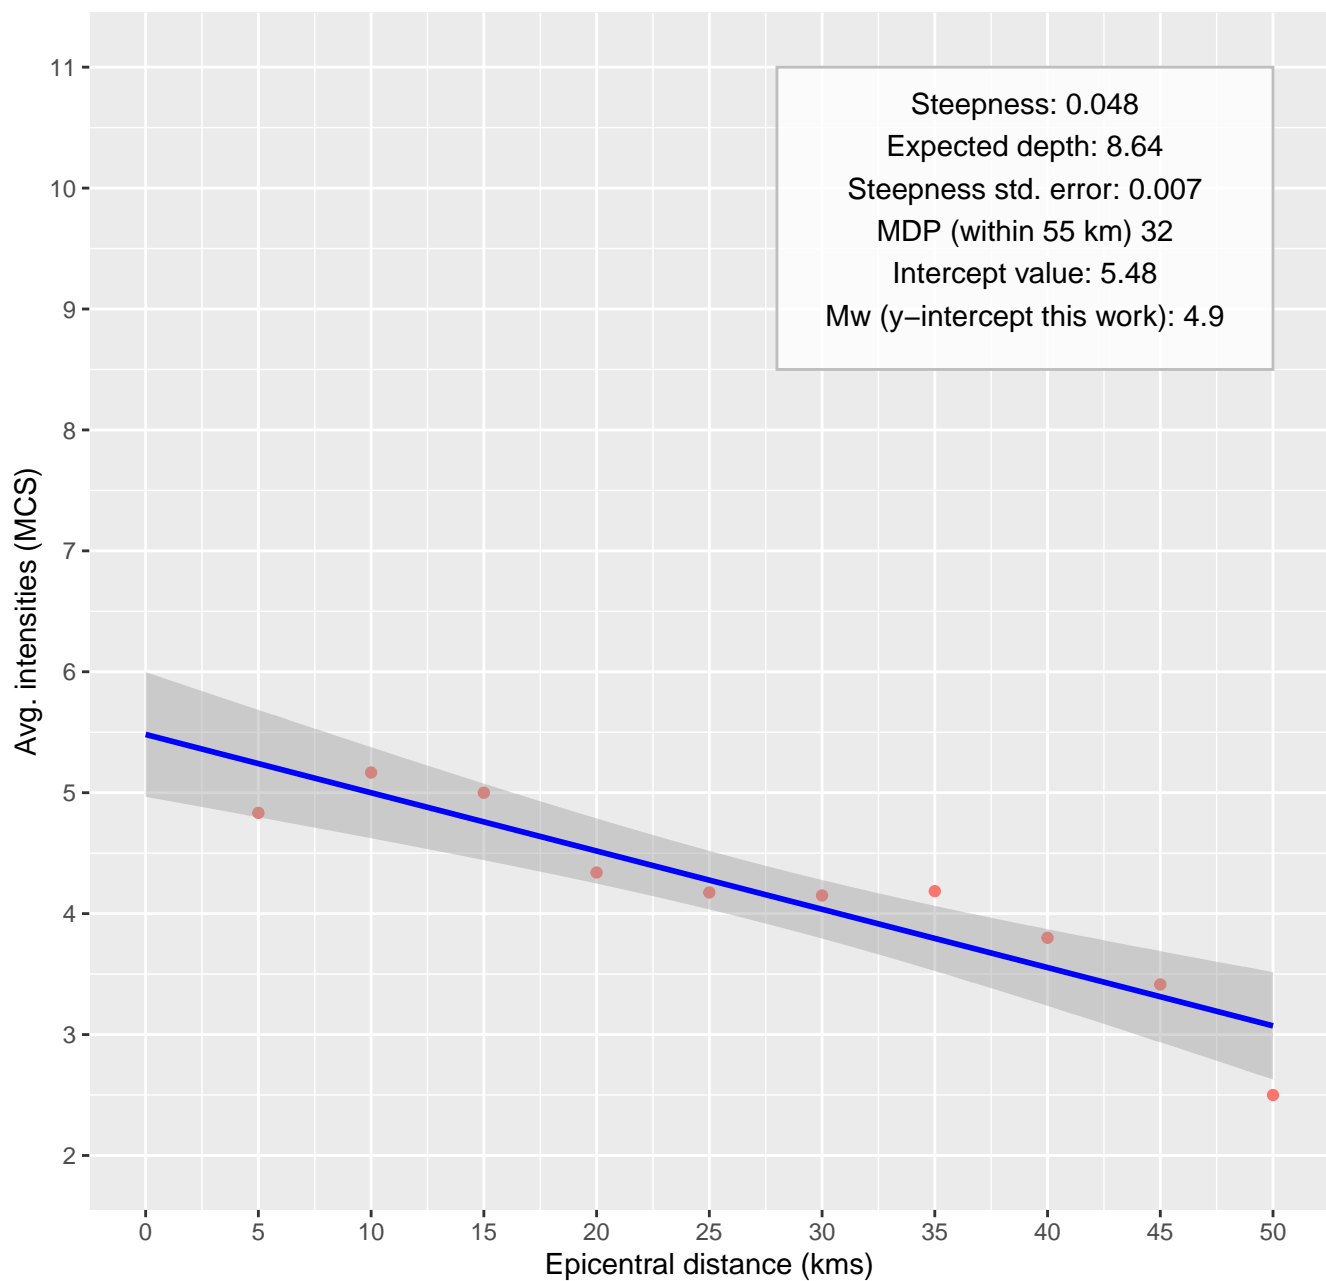

Supplement: Supplementary file 97 [file nhess-23-1007-2023-supplement.zip]

# DBMI\_ 17030114\_1800\_000 | 1703-01-14 – Valnerina

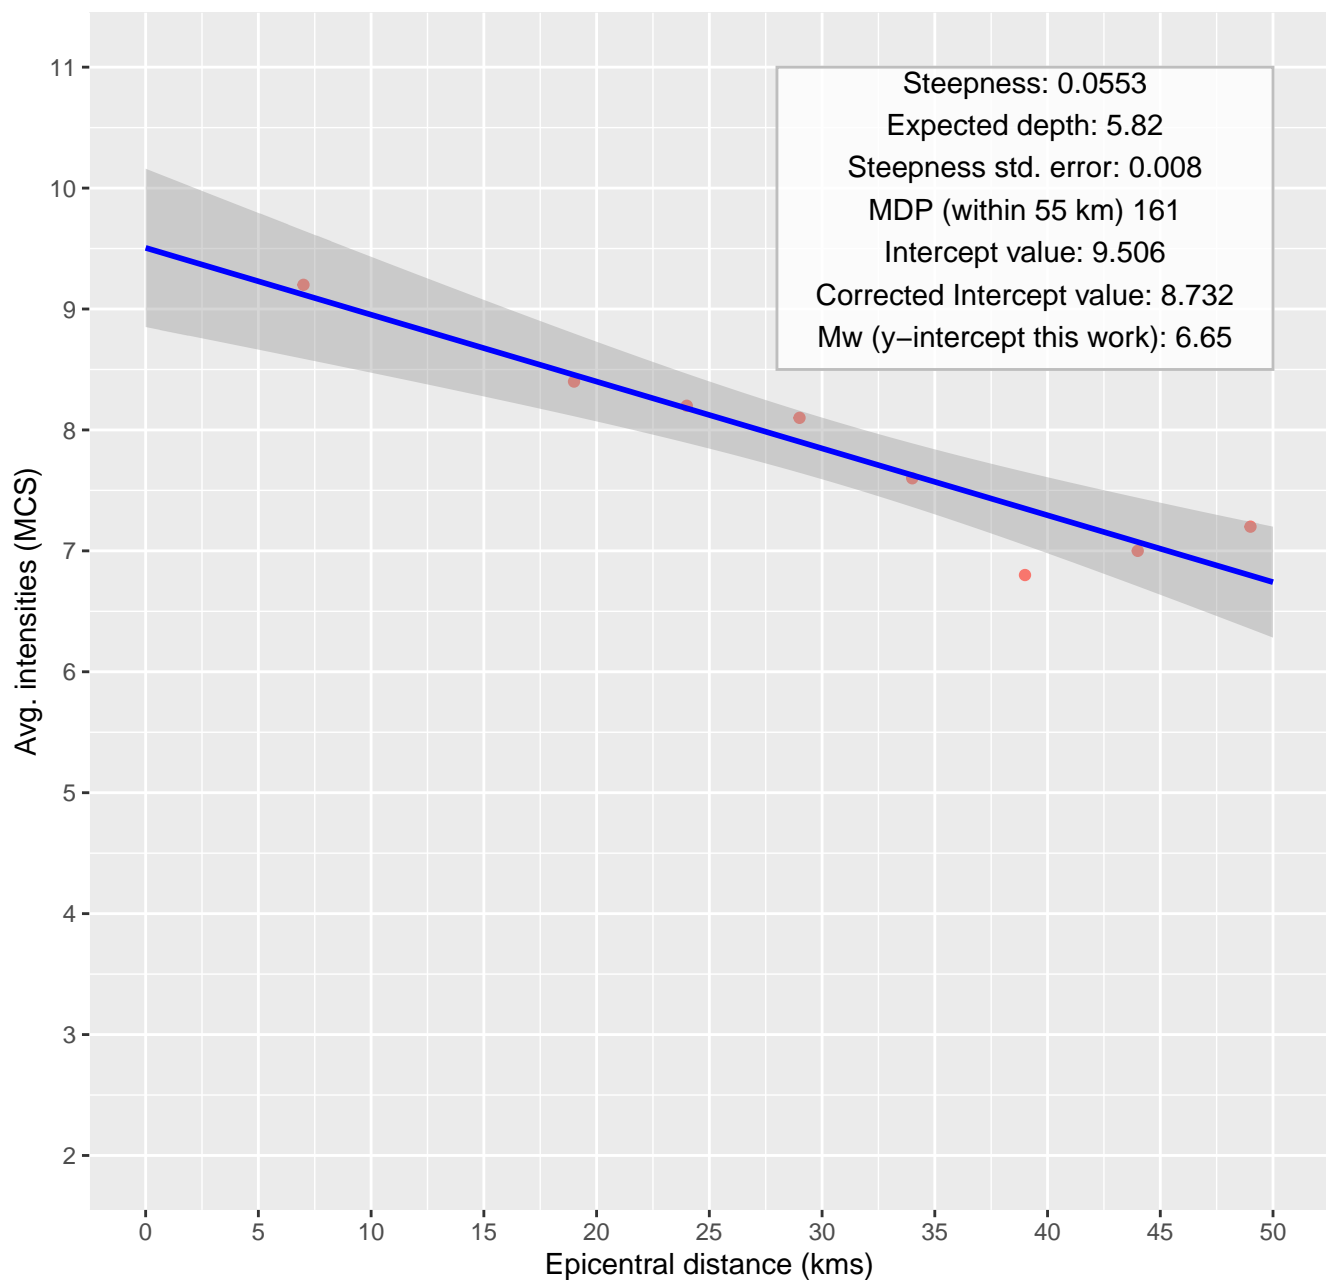

Supplement: Supplementary file 98 [file nhess-23-1007-2023-supplement.zip]

# DBMI\_ 19190629\_1506\_000 | 1919-06-29 – Mugello

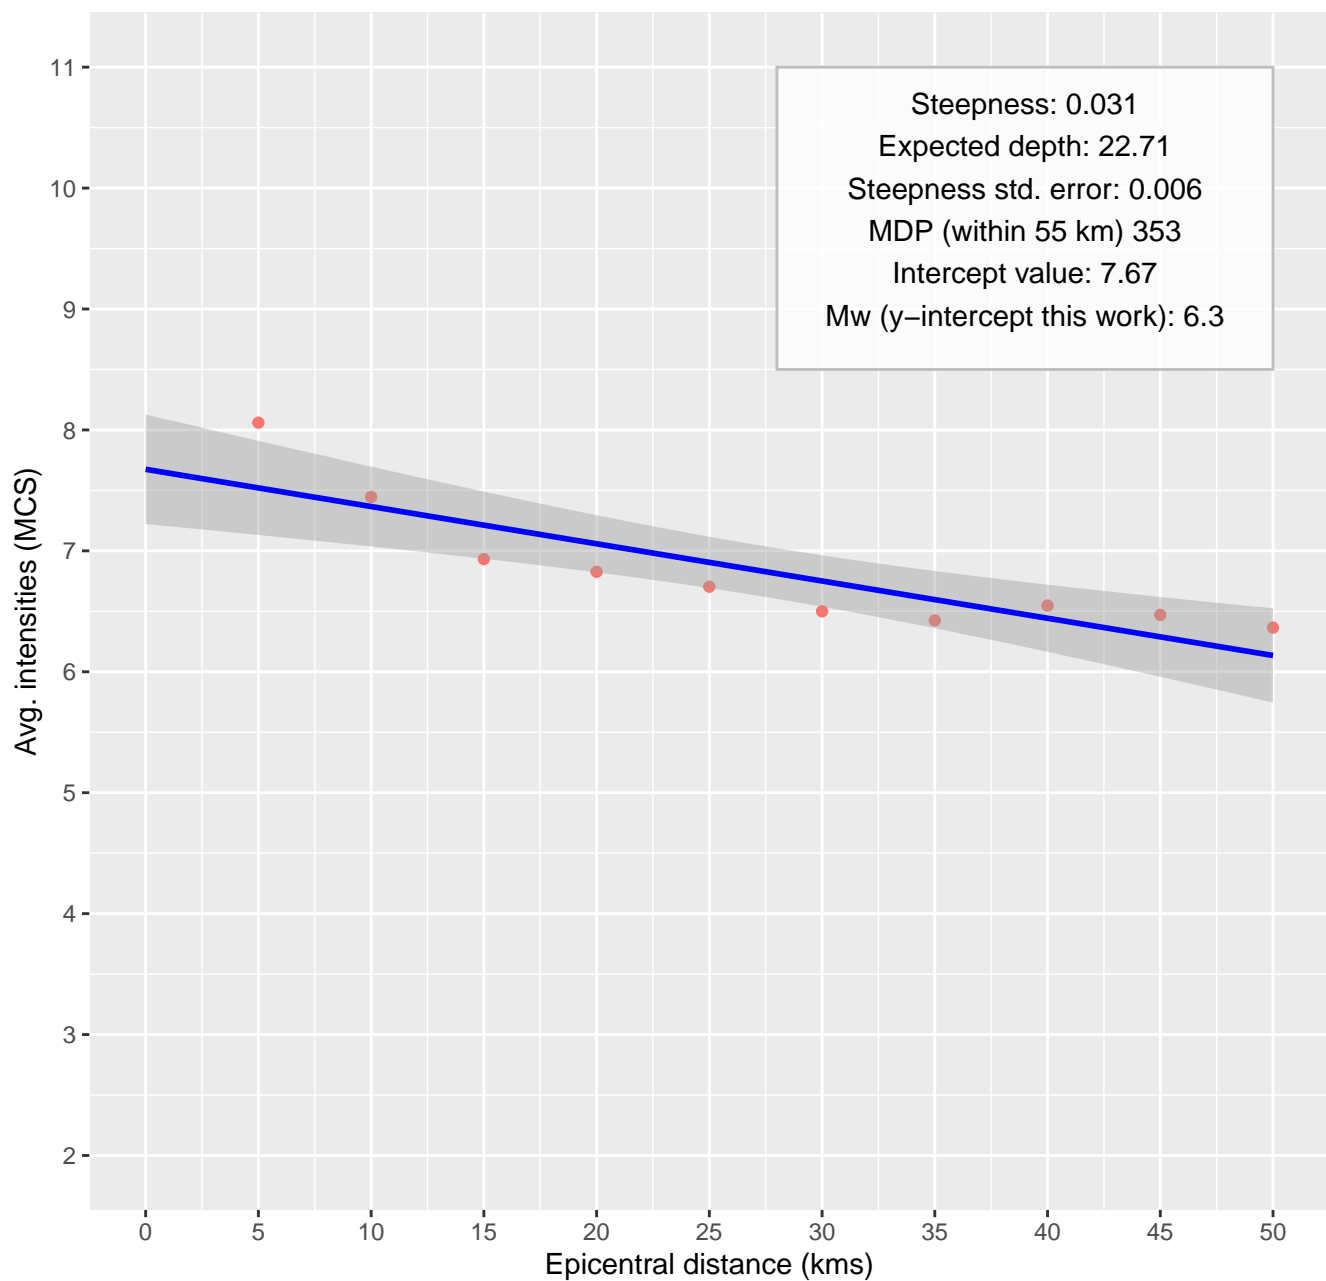

Supplement: Supplementary file 99 [file nhess-23-1007-2023-supplement.zip]
