# Supplementary figures and images for: Inferring the depth and magnitude of pre-instrumental earthquakes from intensity attenuation curves (part 2 of 3)
Source: Copernicus journal article supplement (doi:10.5194/nhess-23-1007-2023), 2023-03-06

# DBMI\_ 19311215\_0323\_000 | 1931-12-15 – Mugello

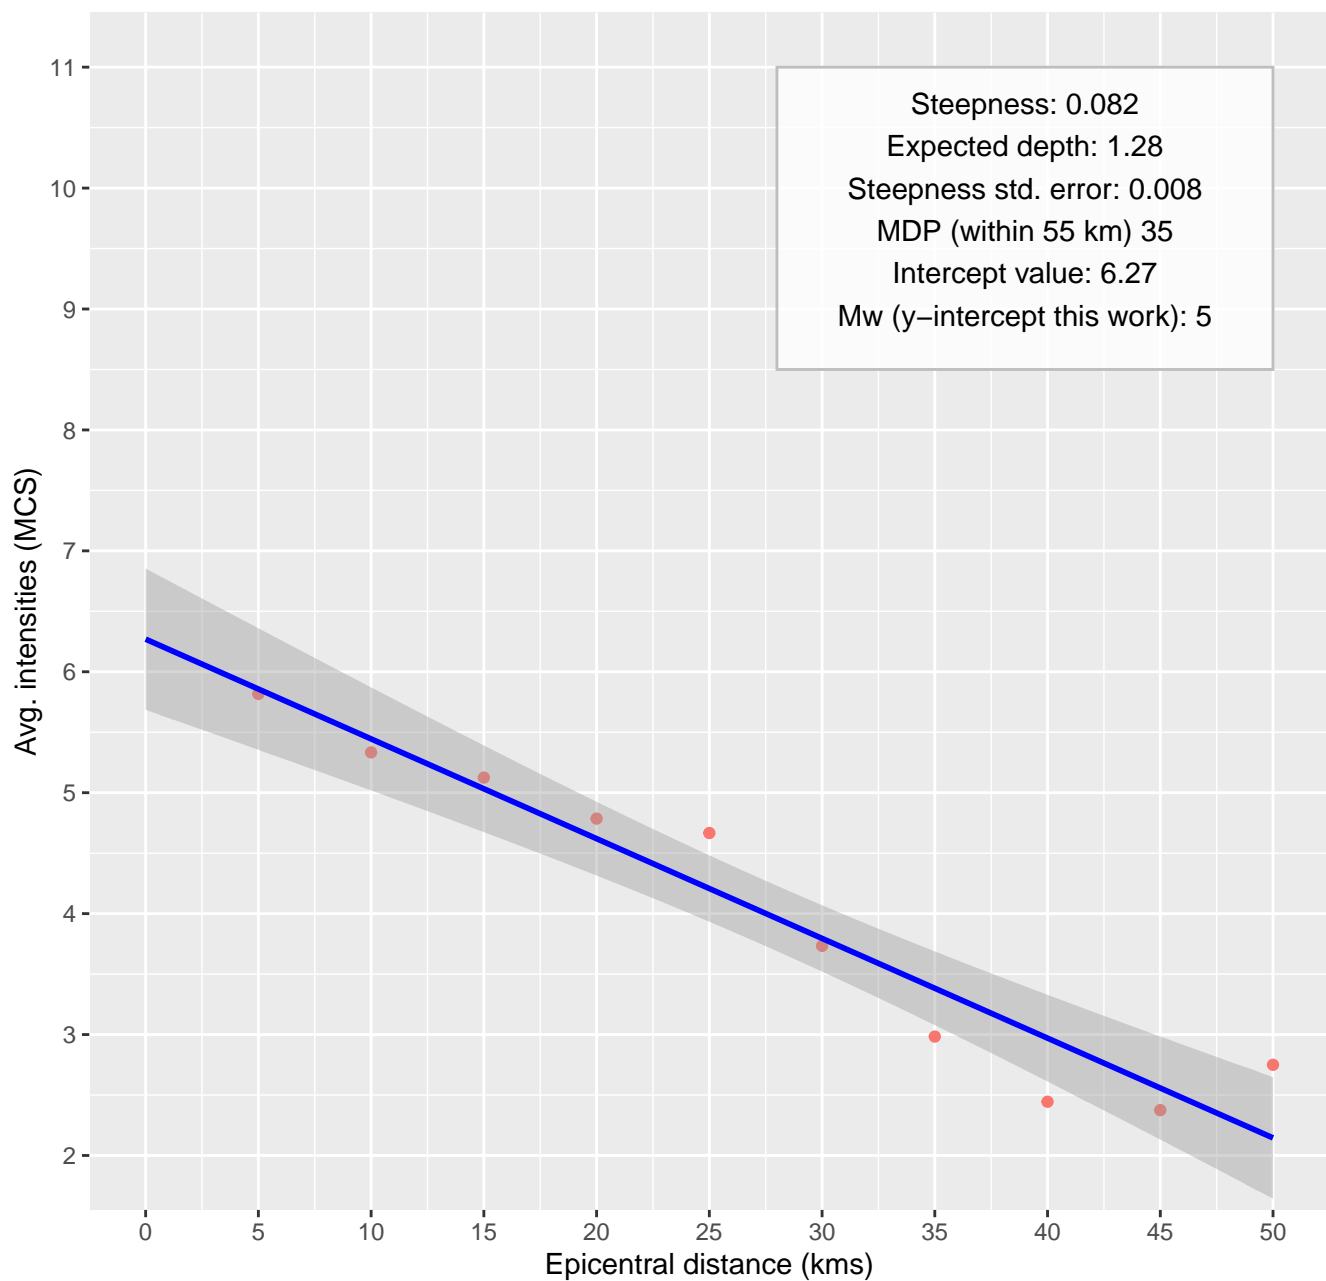

Supplement: Supplementary file 101 [file nhess-23-1007-2023-supplement.zip]

# DBMI\_18871114\_0548\_000 | 1887-11-14 – Fiorentino

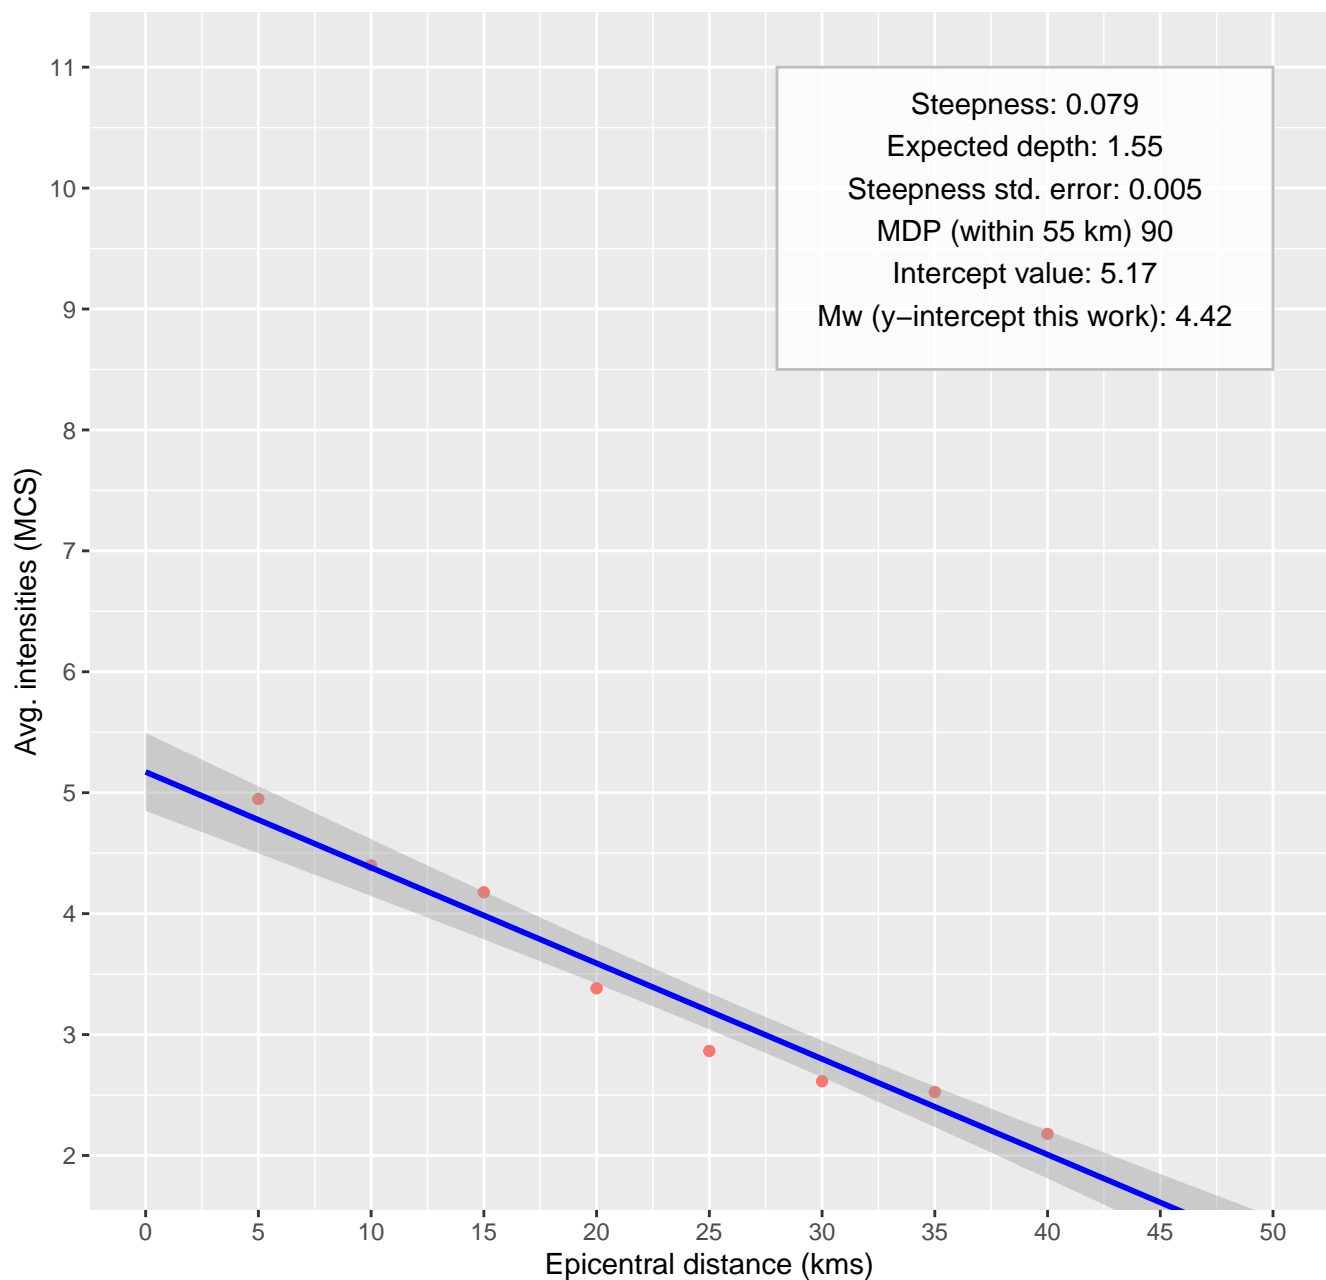

Supplement: Supplementary file 102 [file nhess-23-1007-2023-supplement.zip]

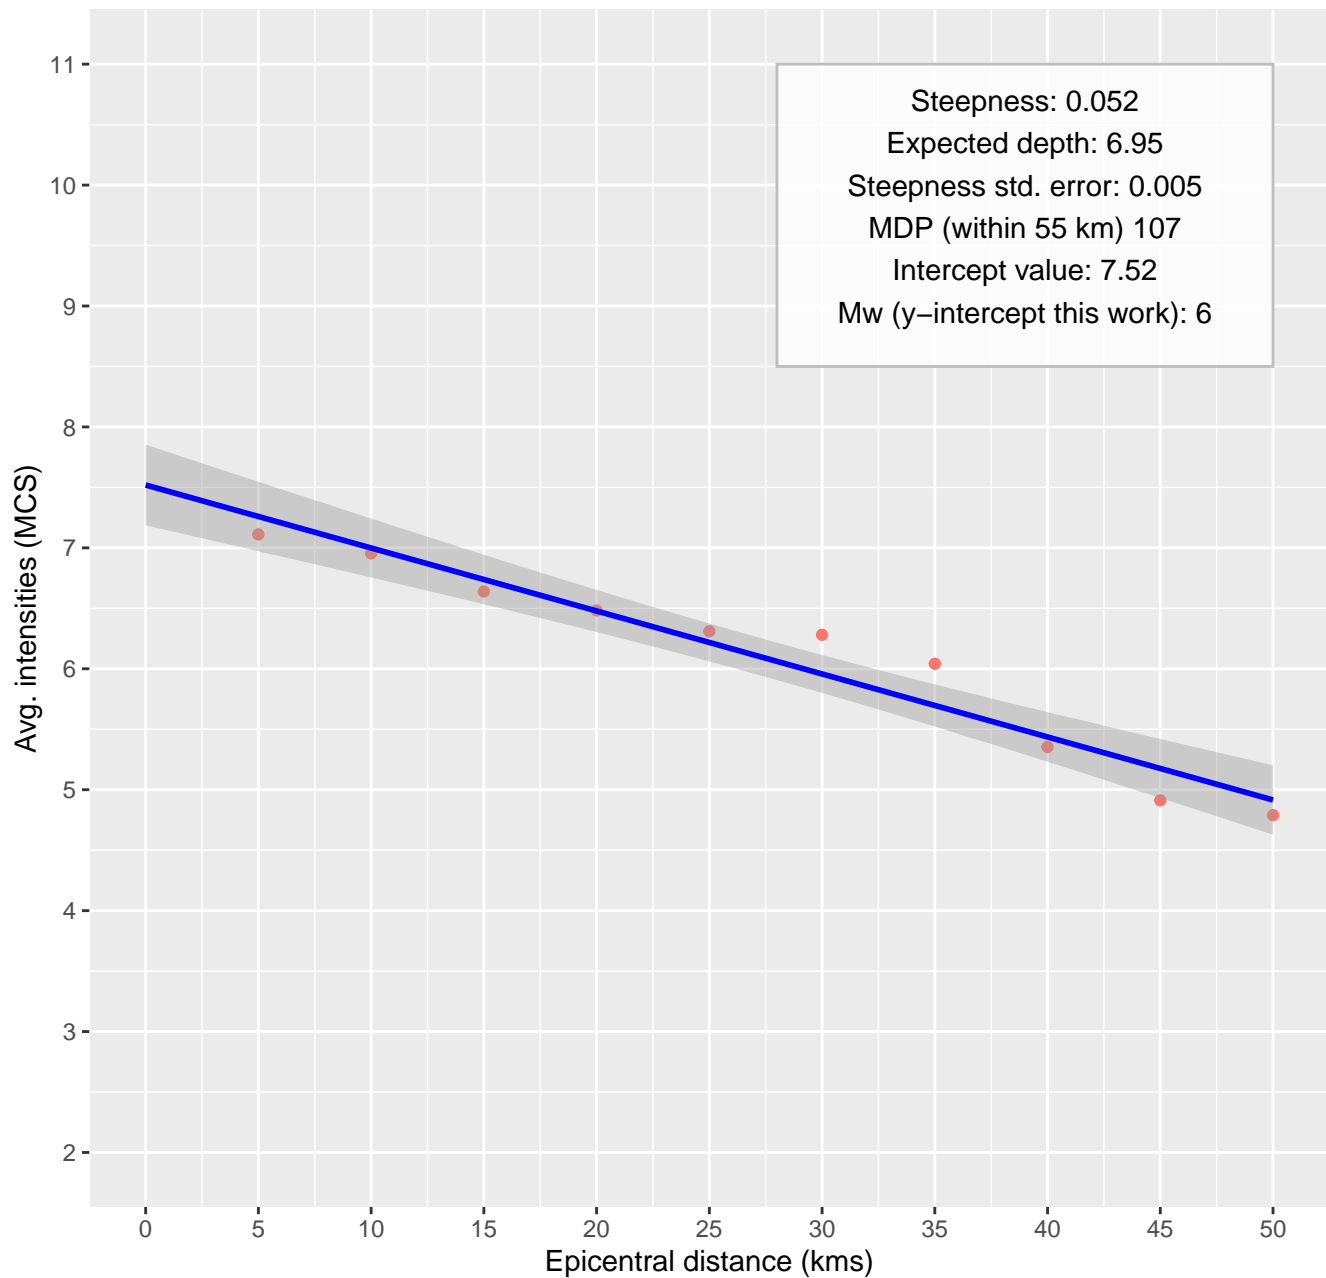

Supplement: Supplementary file 103 [file nhess-23-1007-2023-supplement.zip]

# DBMI\_ 18980220\_0457\_000 | 1898-02-20 – Valli del Natisone

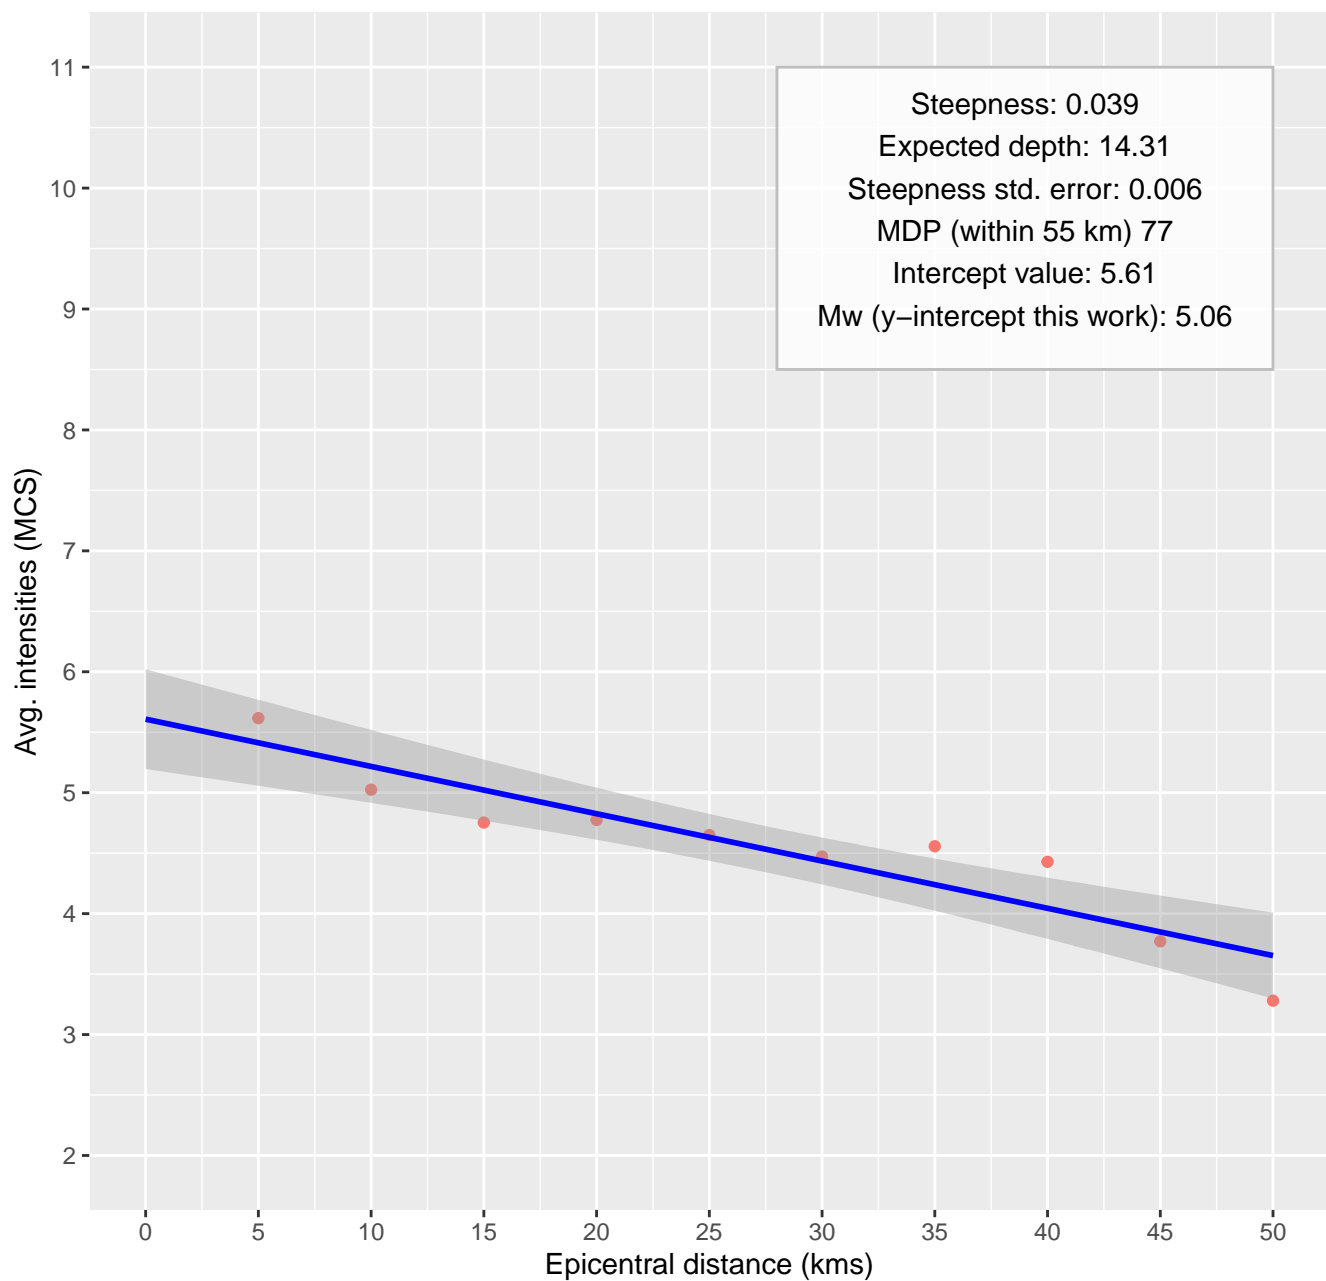

Supplement: Supplementary file 104 [file nhess-23-1007-2023-supplement.zip]

# DBMI\_ 19020619\_0923\_000 | 1902-06-19 – Alpi Retiche

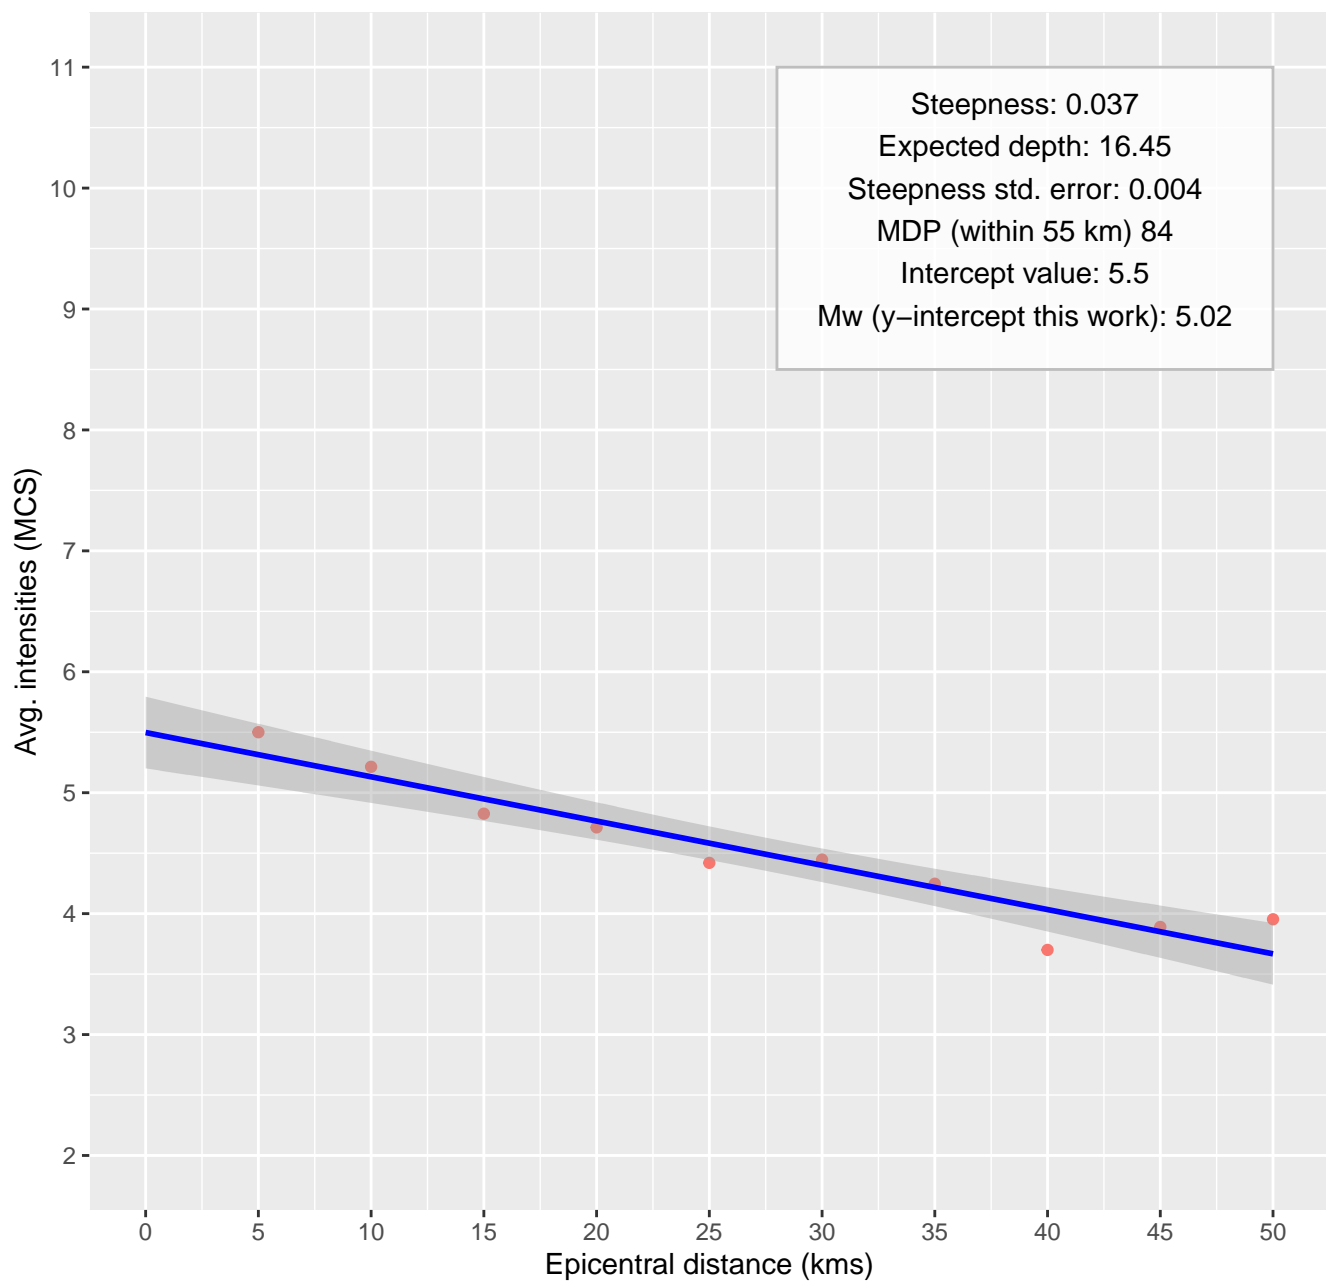

Supplement: Supplementary file 105 [file nhess-23-1007-2023-supplement.zip]

# DBMI\_ 19061110\_1755\_000 | 1906-11-10 – Alta Val di Taro

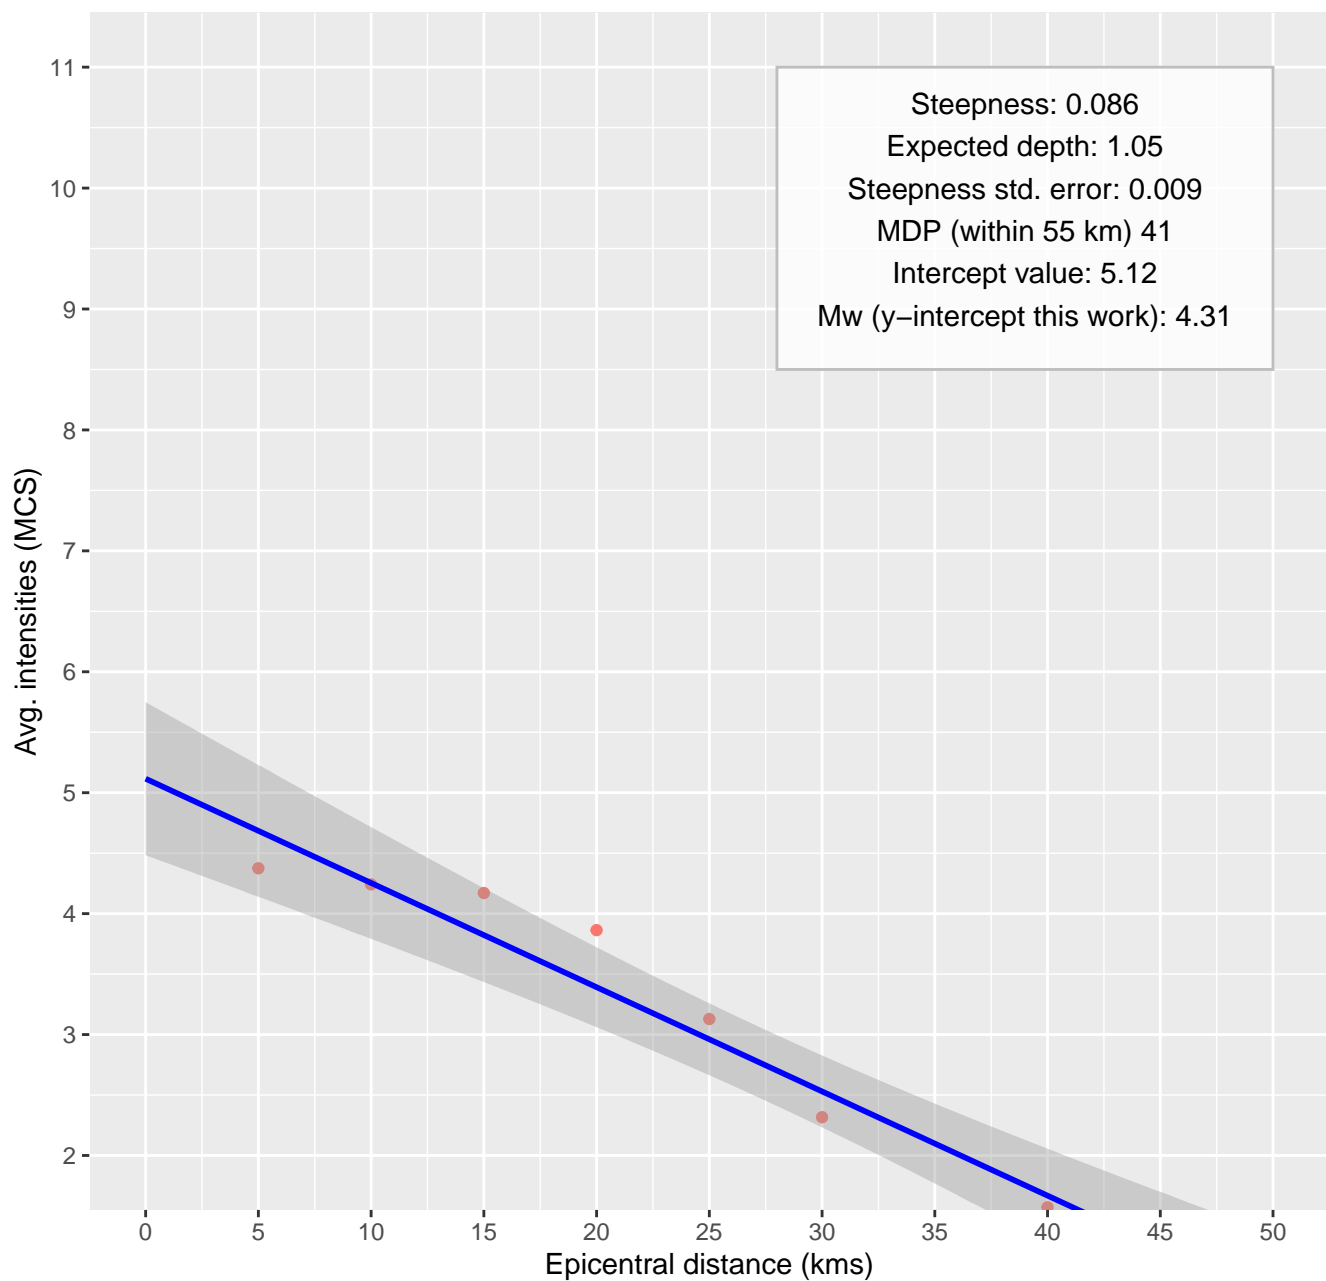

Supplement: Supplementary file 106 [file nhess-23-1007-2023-supplement.zip]

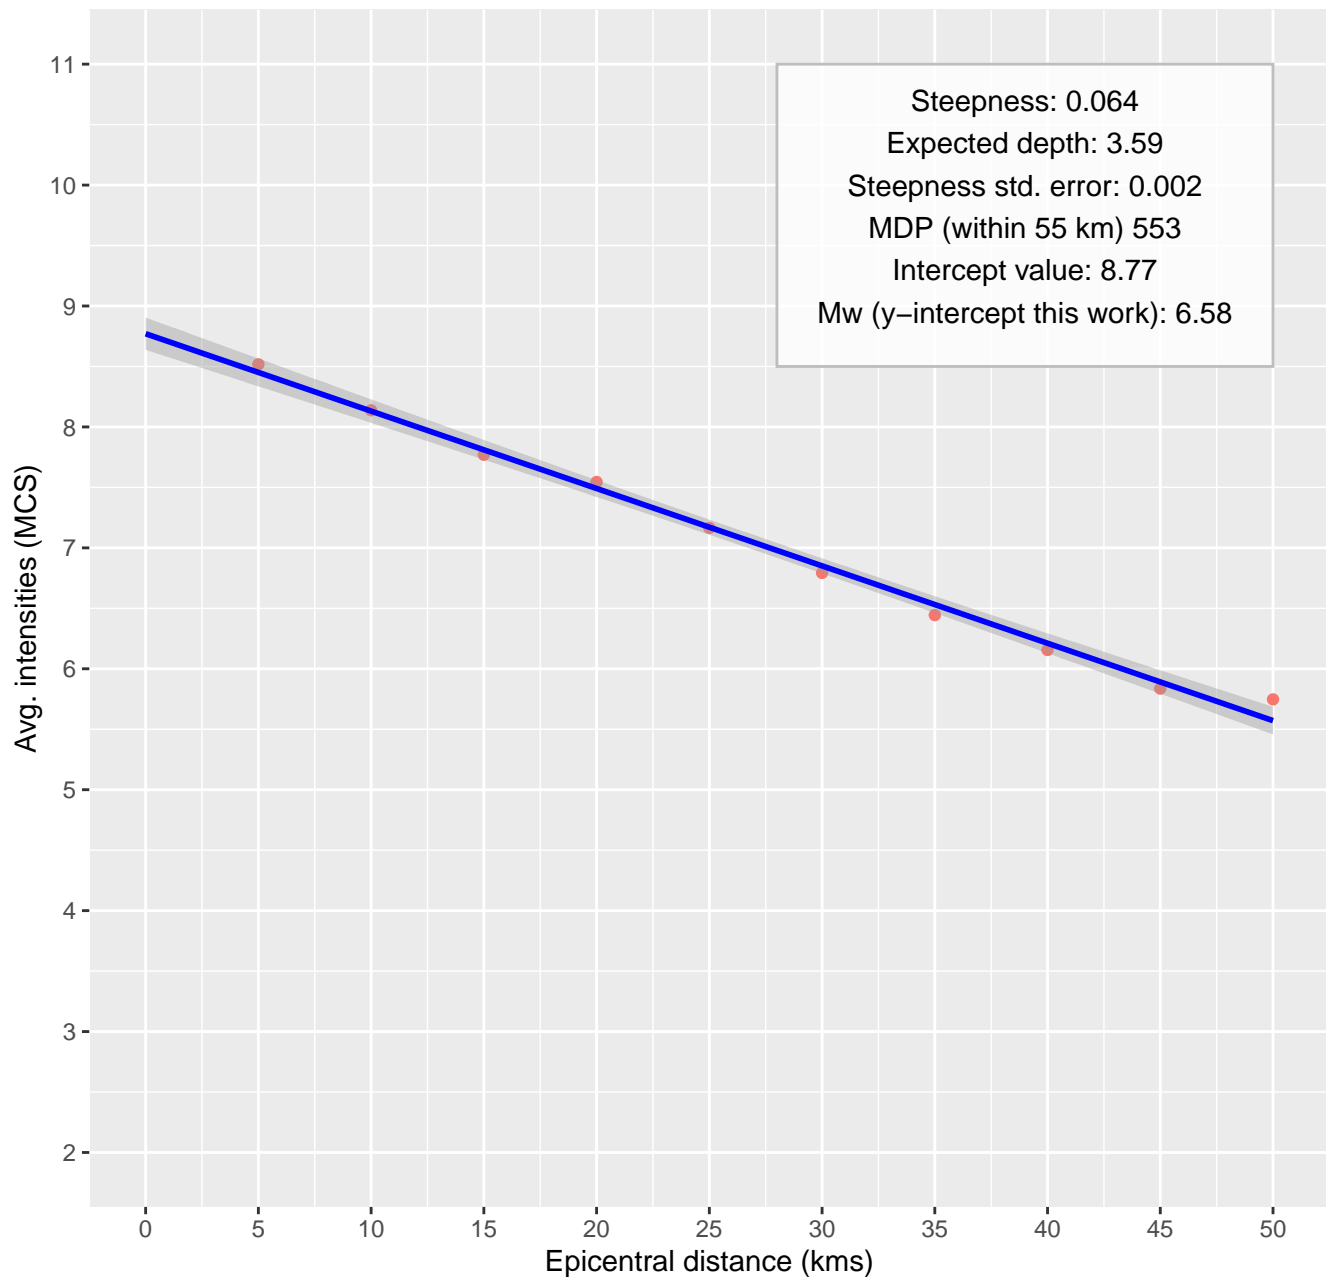

Supplement: Supplementary file 107 [file nhess-23-1007-2023-supplement.zip]

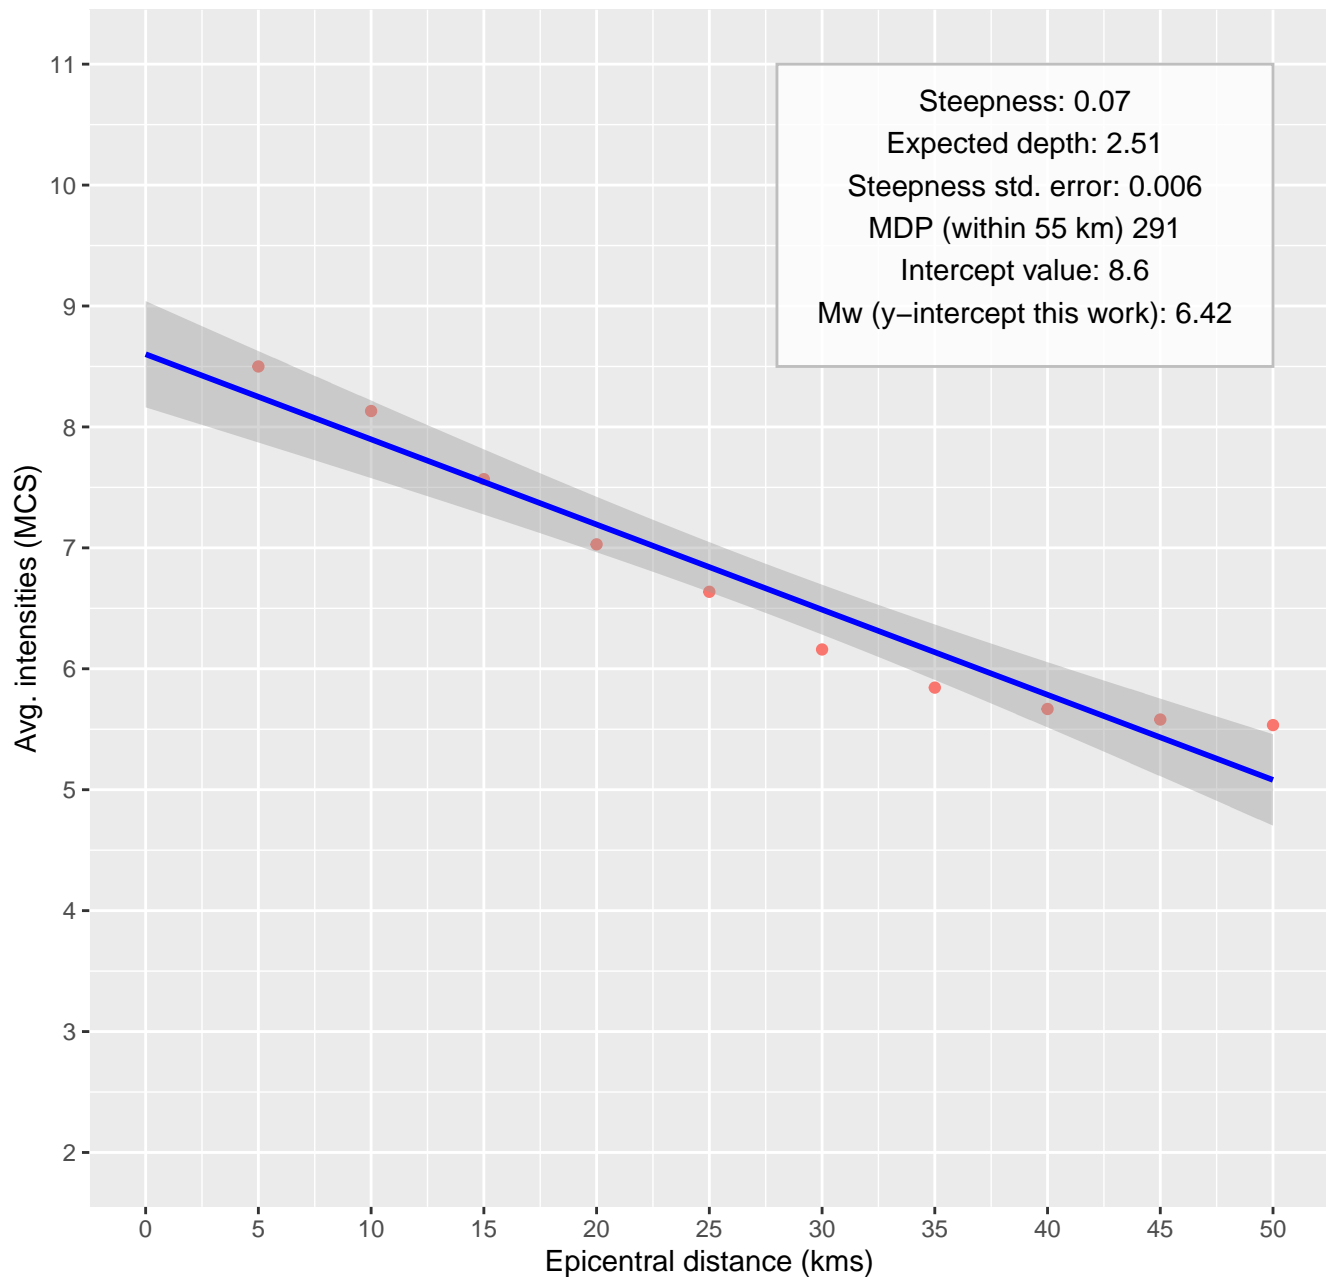

Supplement: Supplementary file 108 [file nhess-23-1007-2023-supplement.zip]

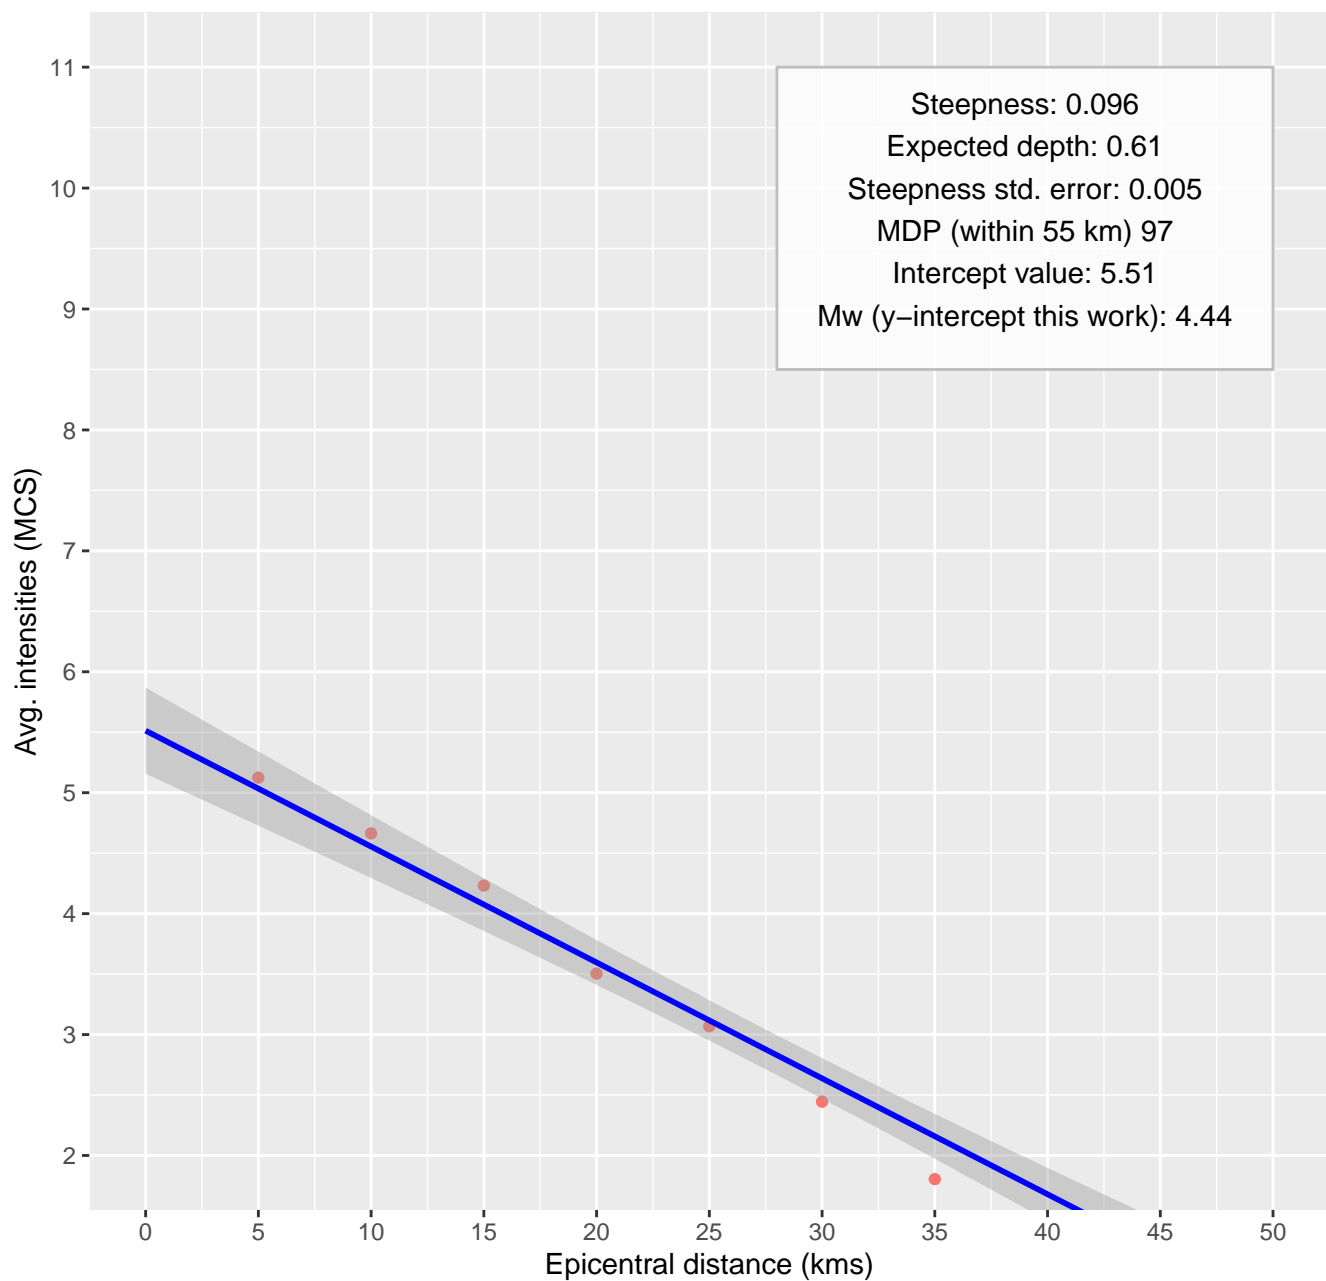

Supplement: Supplementary file 109 [file nhess-23-1007-2023-supplement.zip]

# DBMI\_ 18770824\_0245\_000 | 1877-08-24 – Lazio meridionale

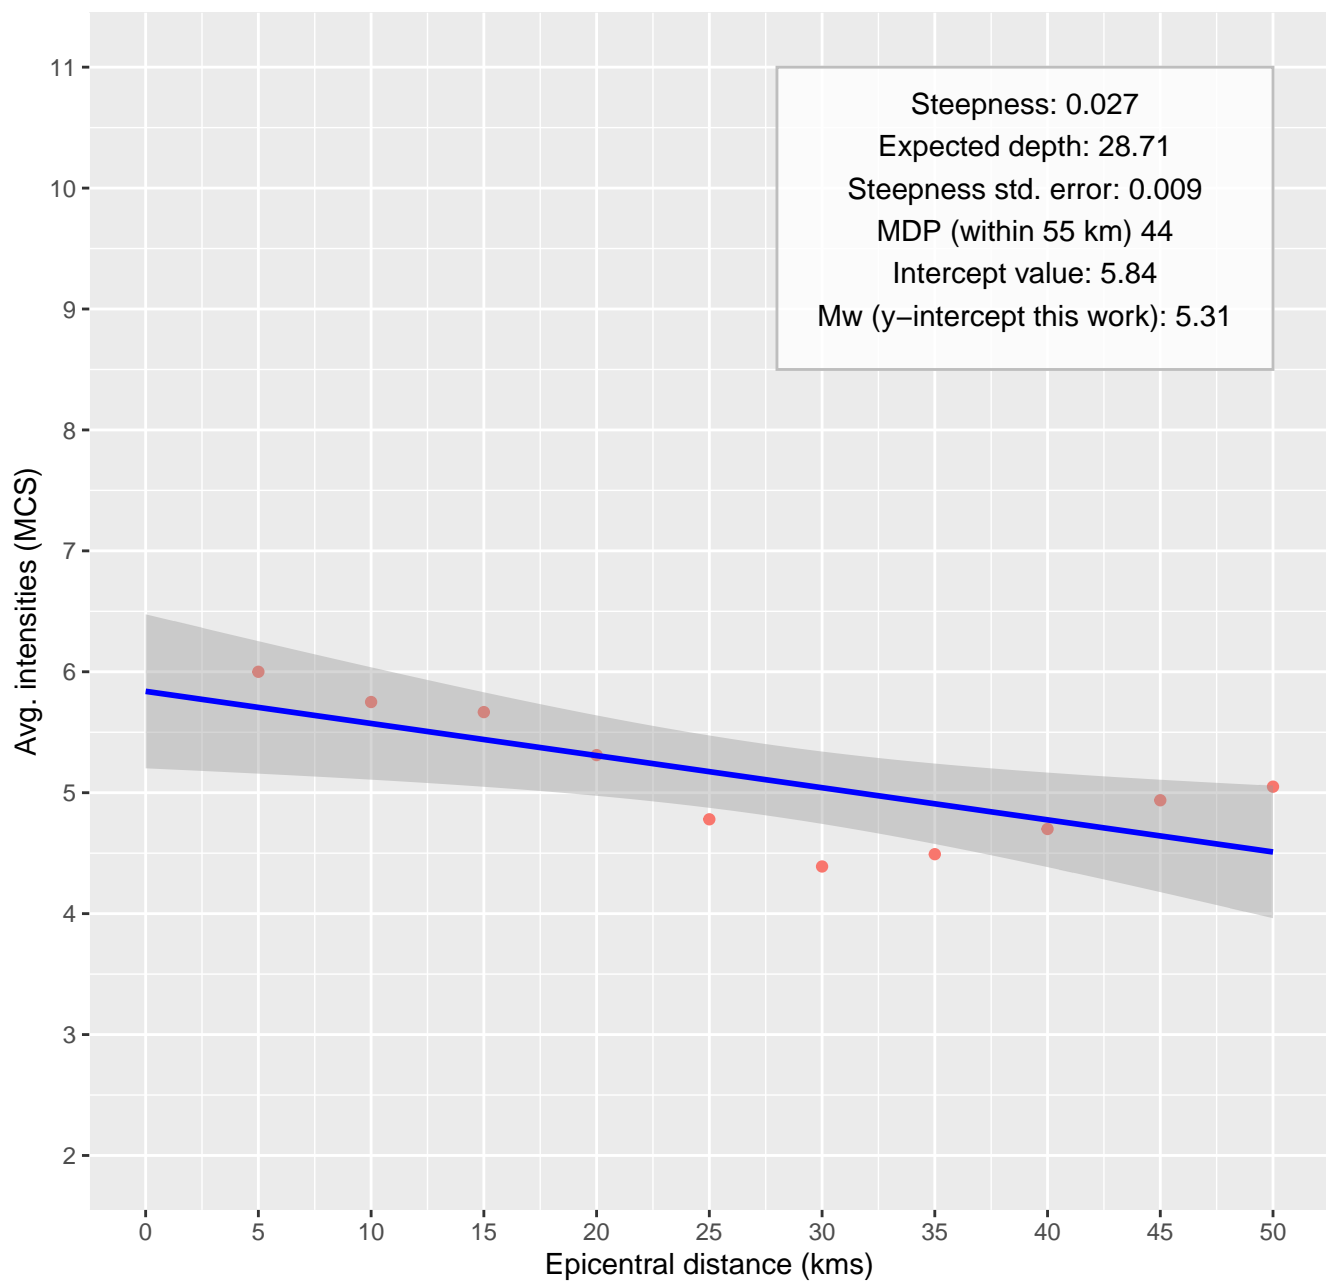

Supplement: Supplementary file 110 [file nhess-23-1007-2023-supplement.zip]

# DBMI\_19350219\_0001\_000 | 1935-02-19 – Cuneese

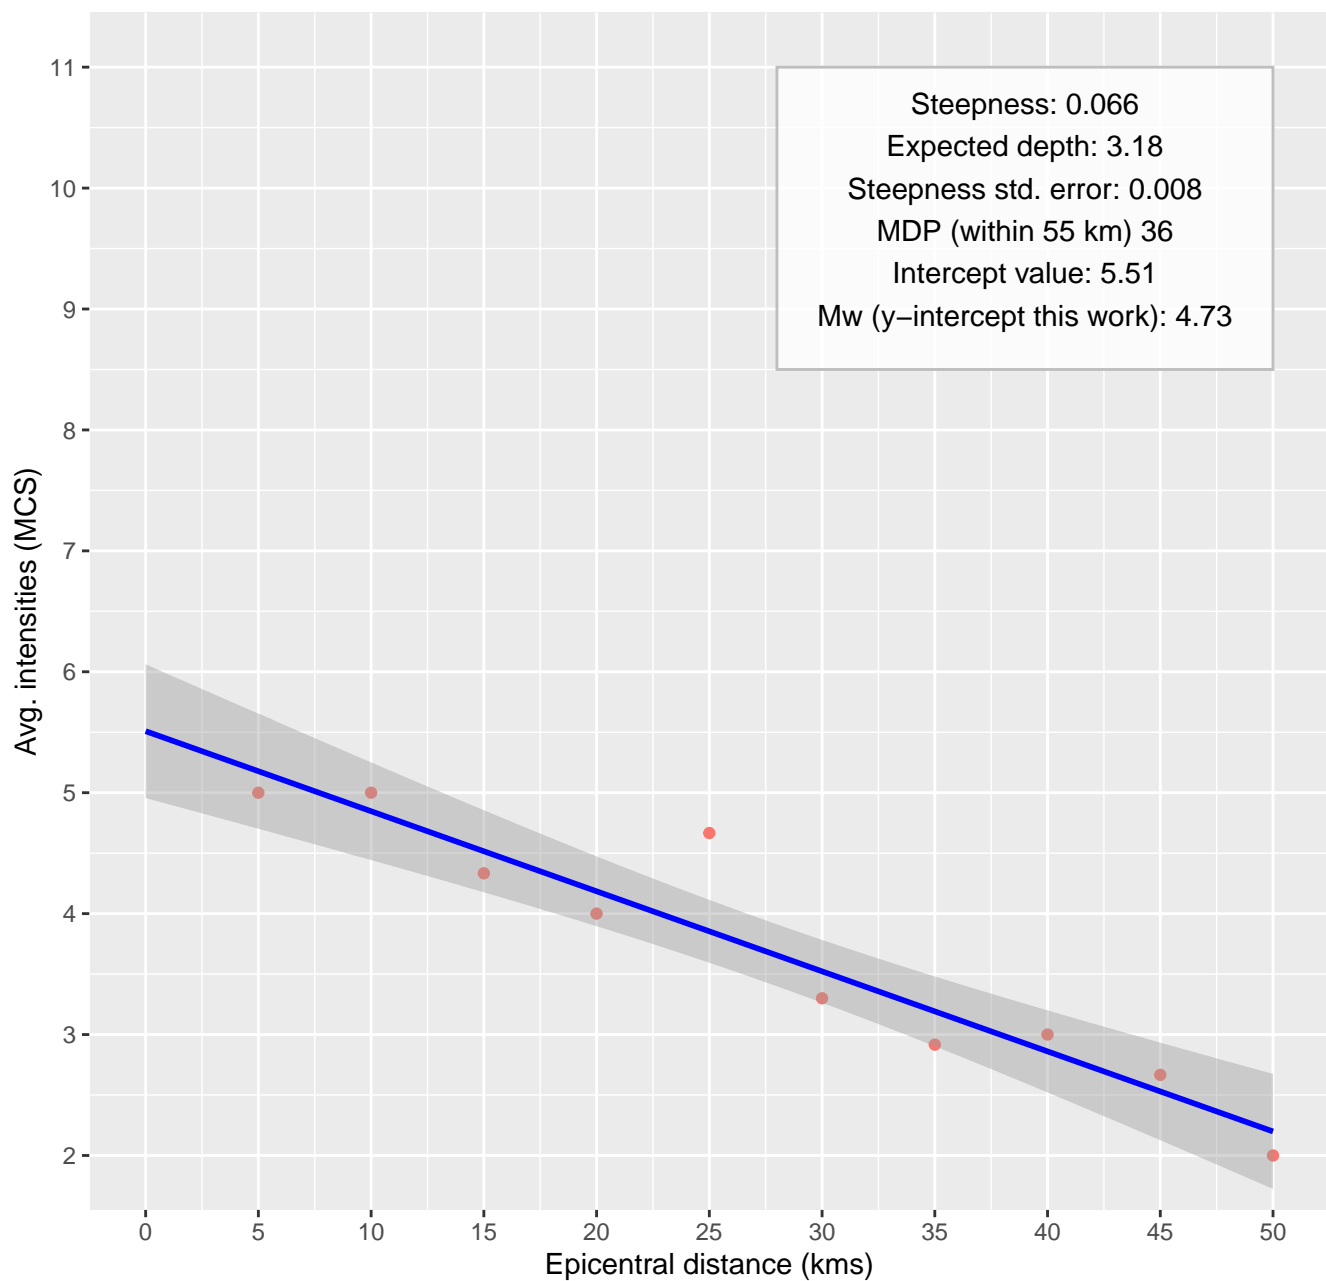

Supplement: Supplementary file 112 [file nhess-23-1007-2023-supplement.zip]

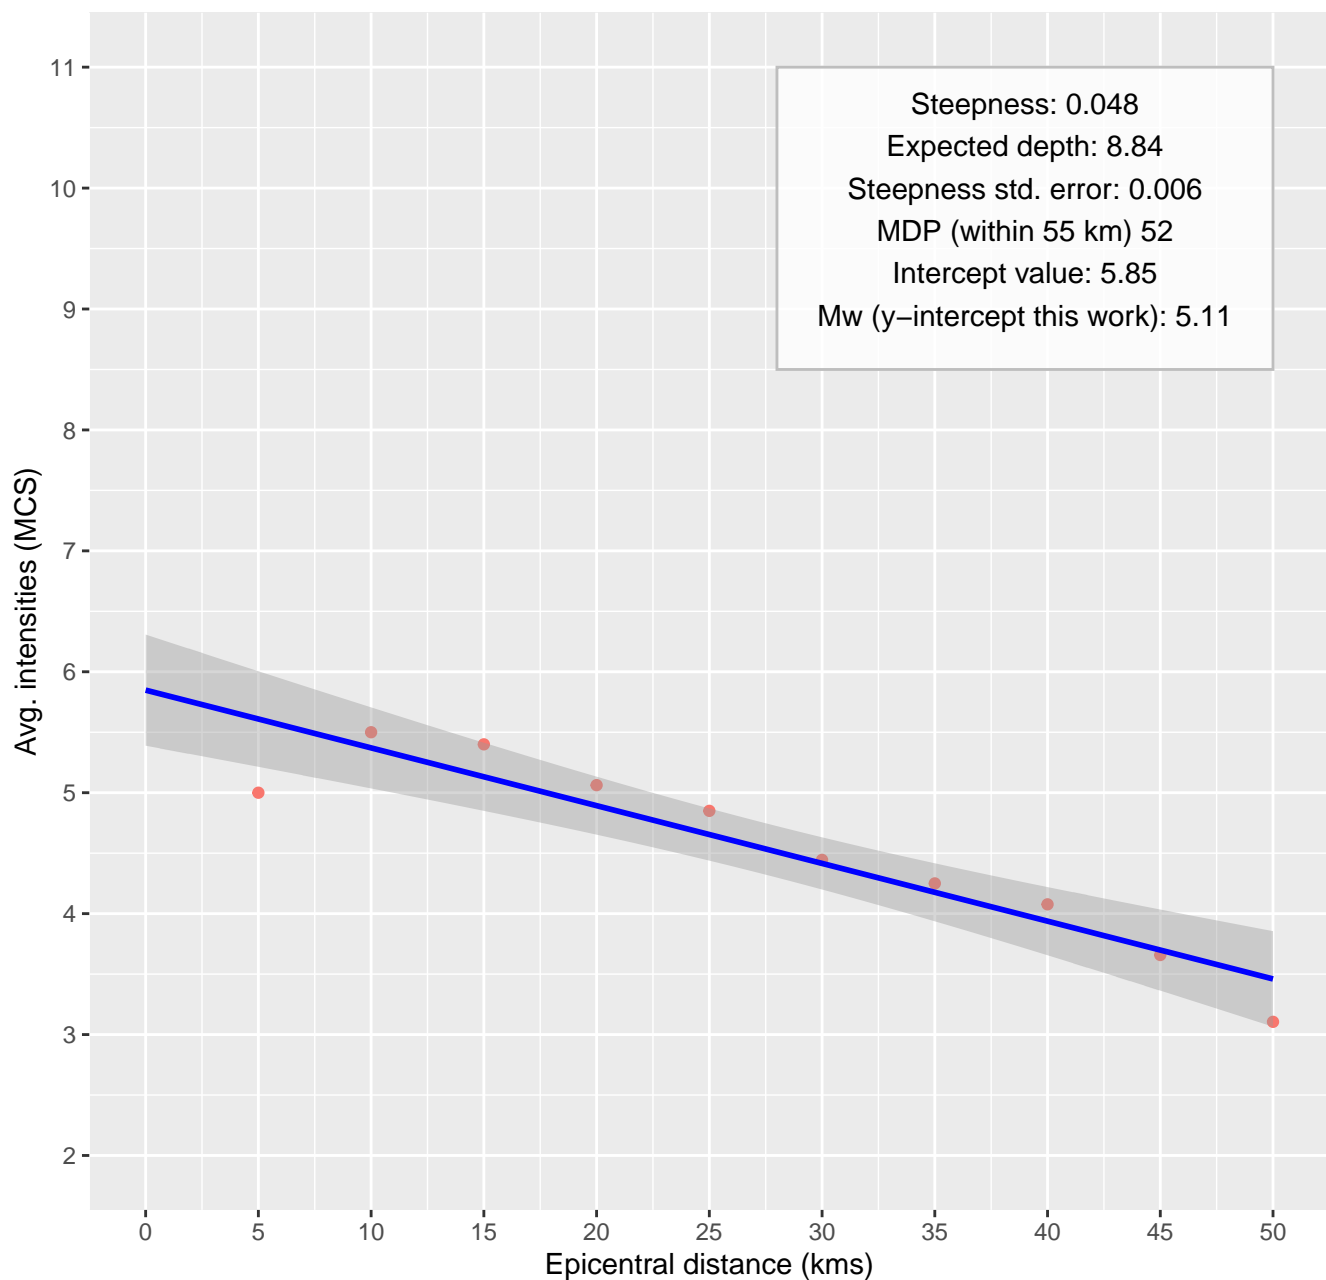

Supplement: Supplementary file 113 [file nhess-23-1007-2023-supplement.zip]

# DBMI\_ 19520118\_0136\_000 | 1952-01-18 – Pordenonese

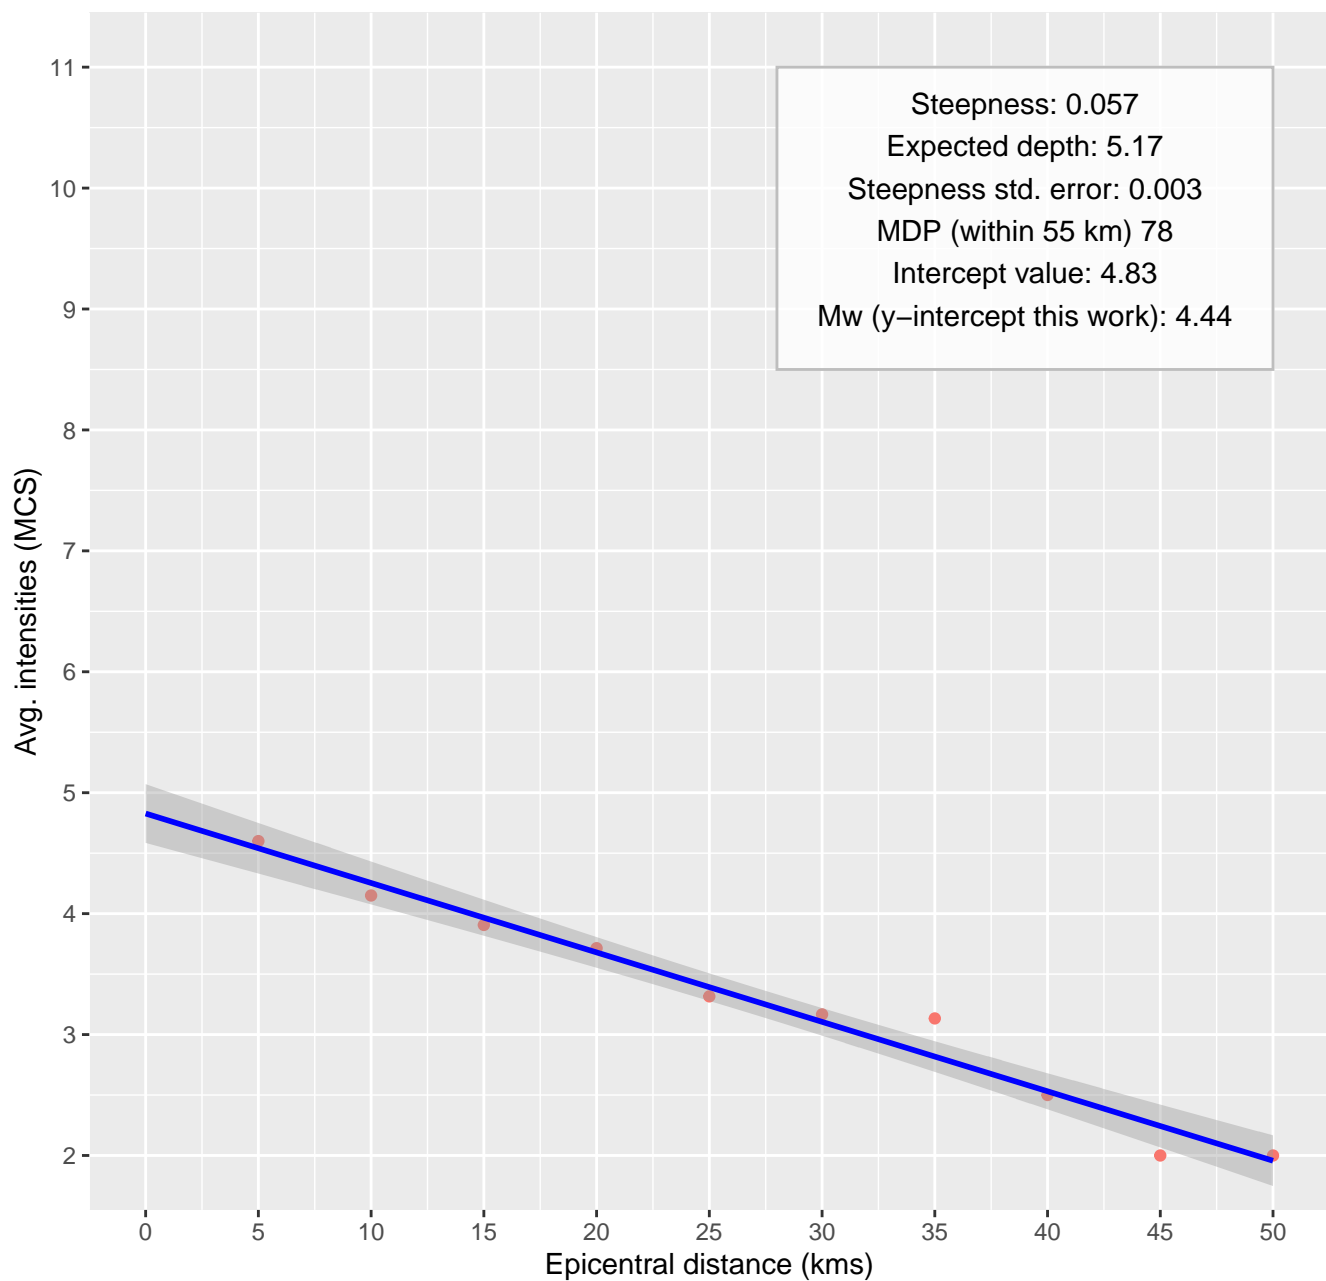

Supplement: Supplementary file 114 [file nhess-23-1007-2023-supplement.zip]

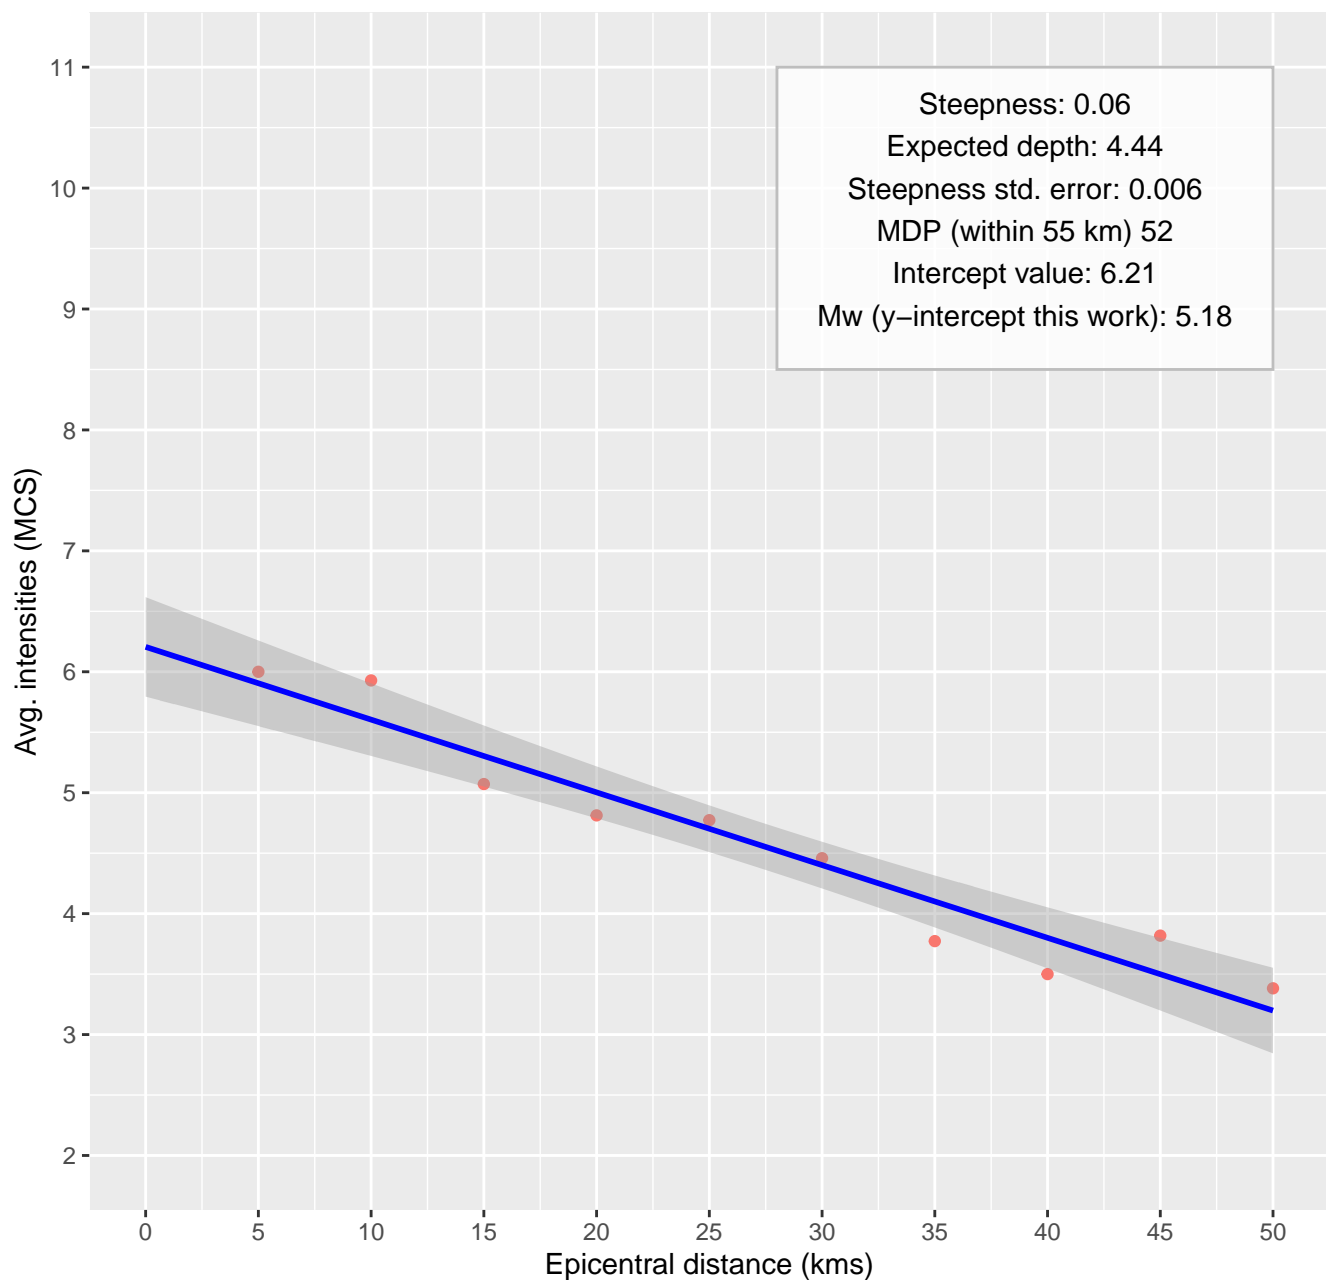

Supplement: Supplementary file 115 [file nhess-23-1007-2023-supplement.zip]

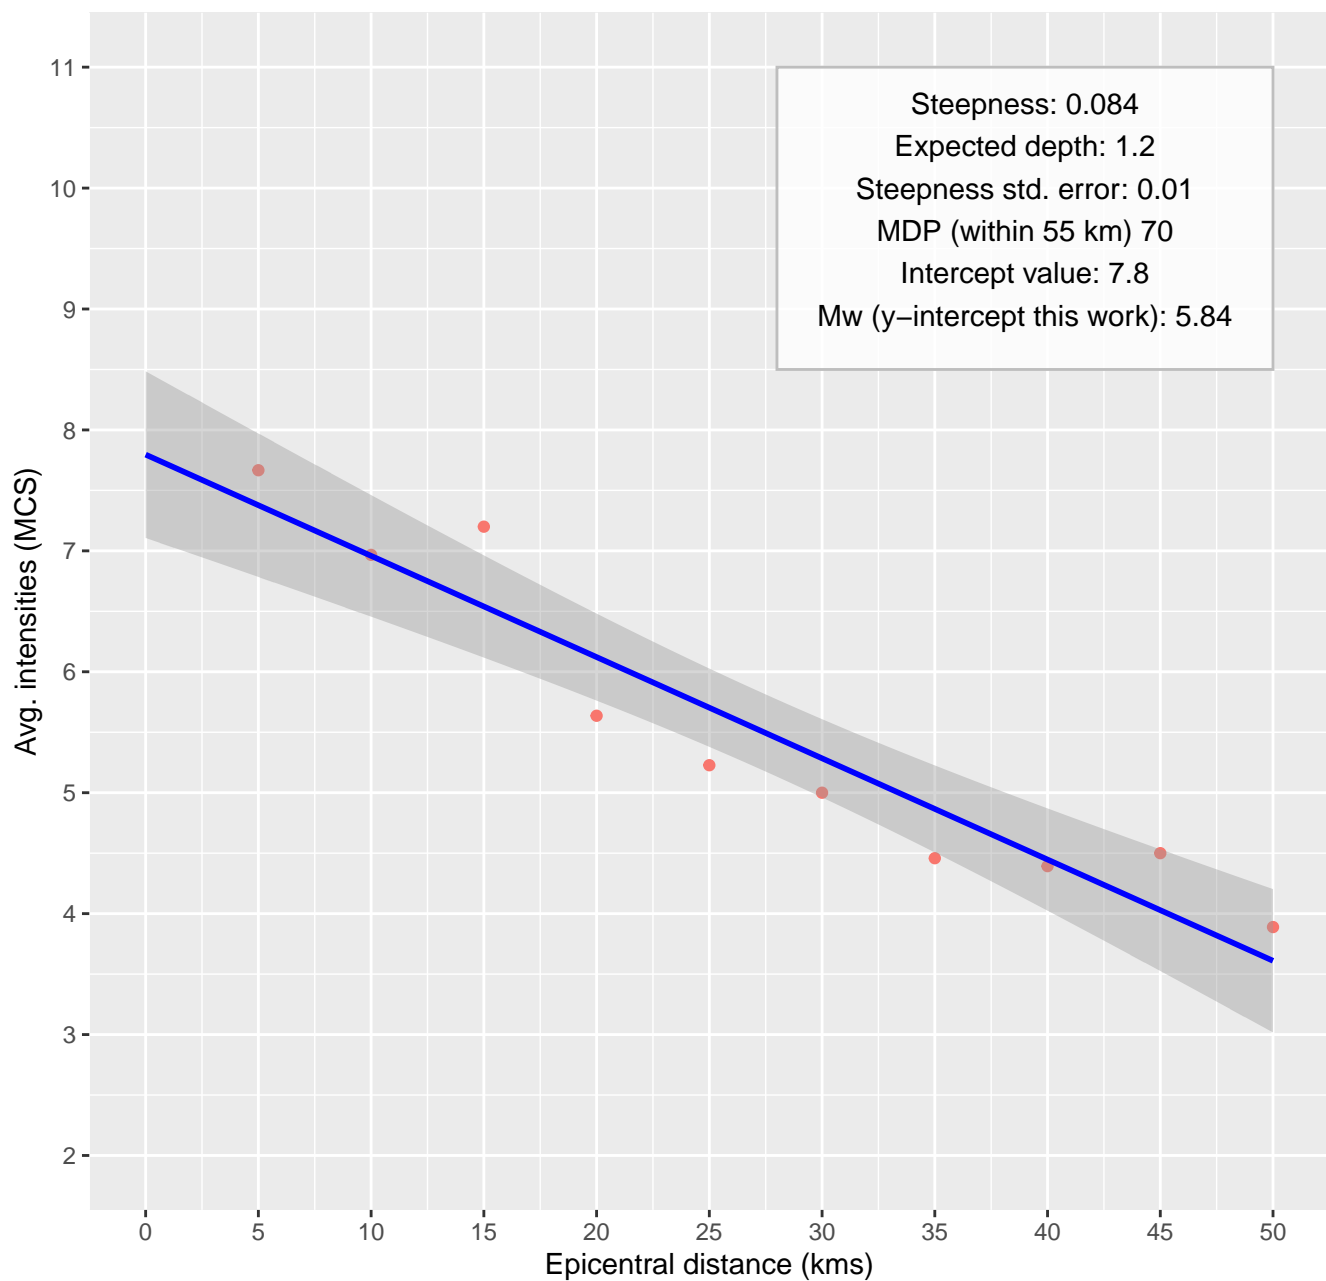

Supplement: Supplementary file 116 [file nhess-23-1007-2023-supplement.zip]

# DBMI\_ 19041117\_0502\_000 | 1904-11-17 - Pistoiese

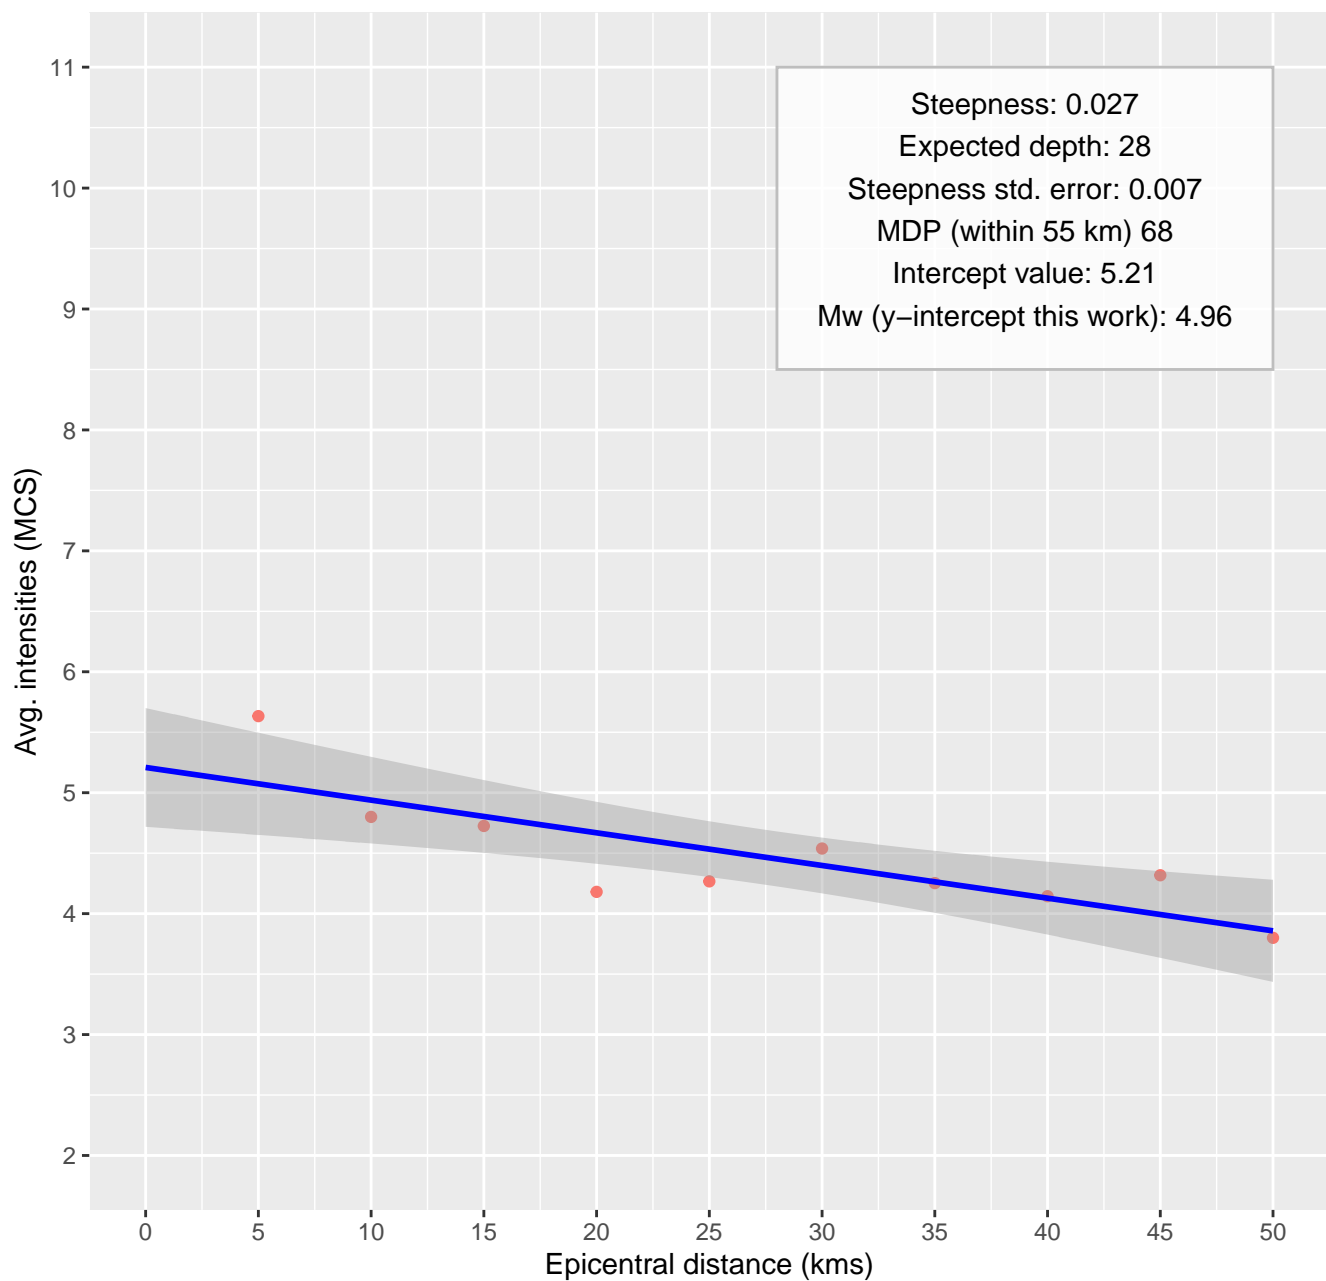

Supplement: Supplementary file 117 [file nhess-23-1007-2023-supplement.zip]

# DBMI\_ 19770605\_1359\_000 | 1977-06-05 – Monti Nebrodi

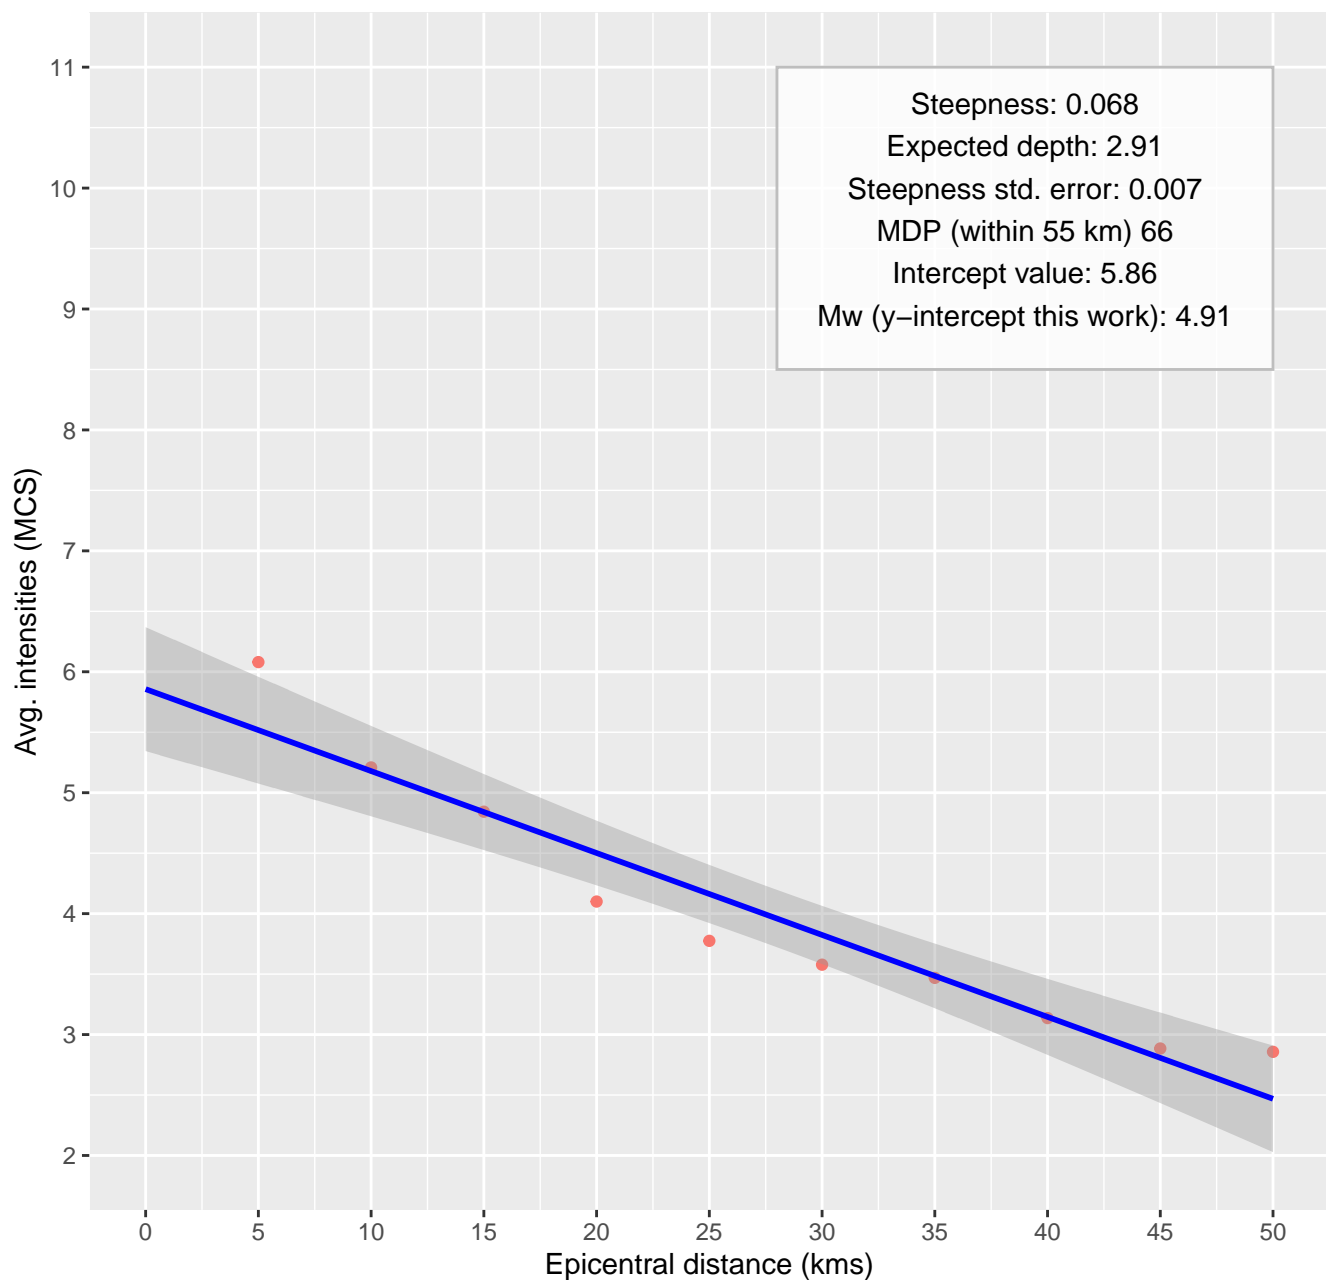

Supplement: Supplementary file 118 [file nhess-23-1007-2023-supplement.zip]

# DBMI\_ 17990728\_2205\_000 | 1799-07-28 – Appennino marchigiano

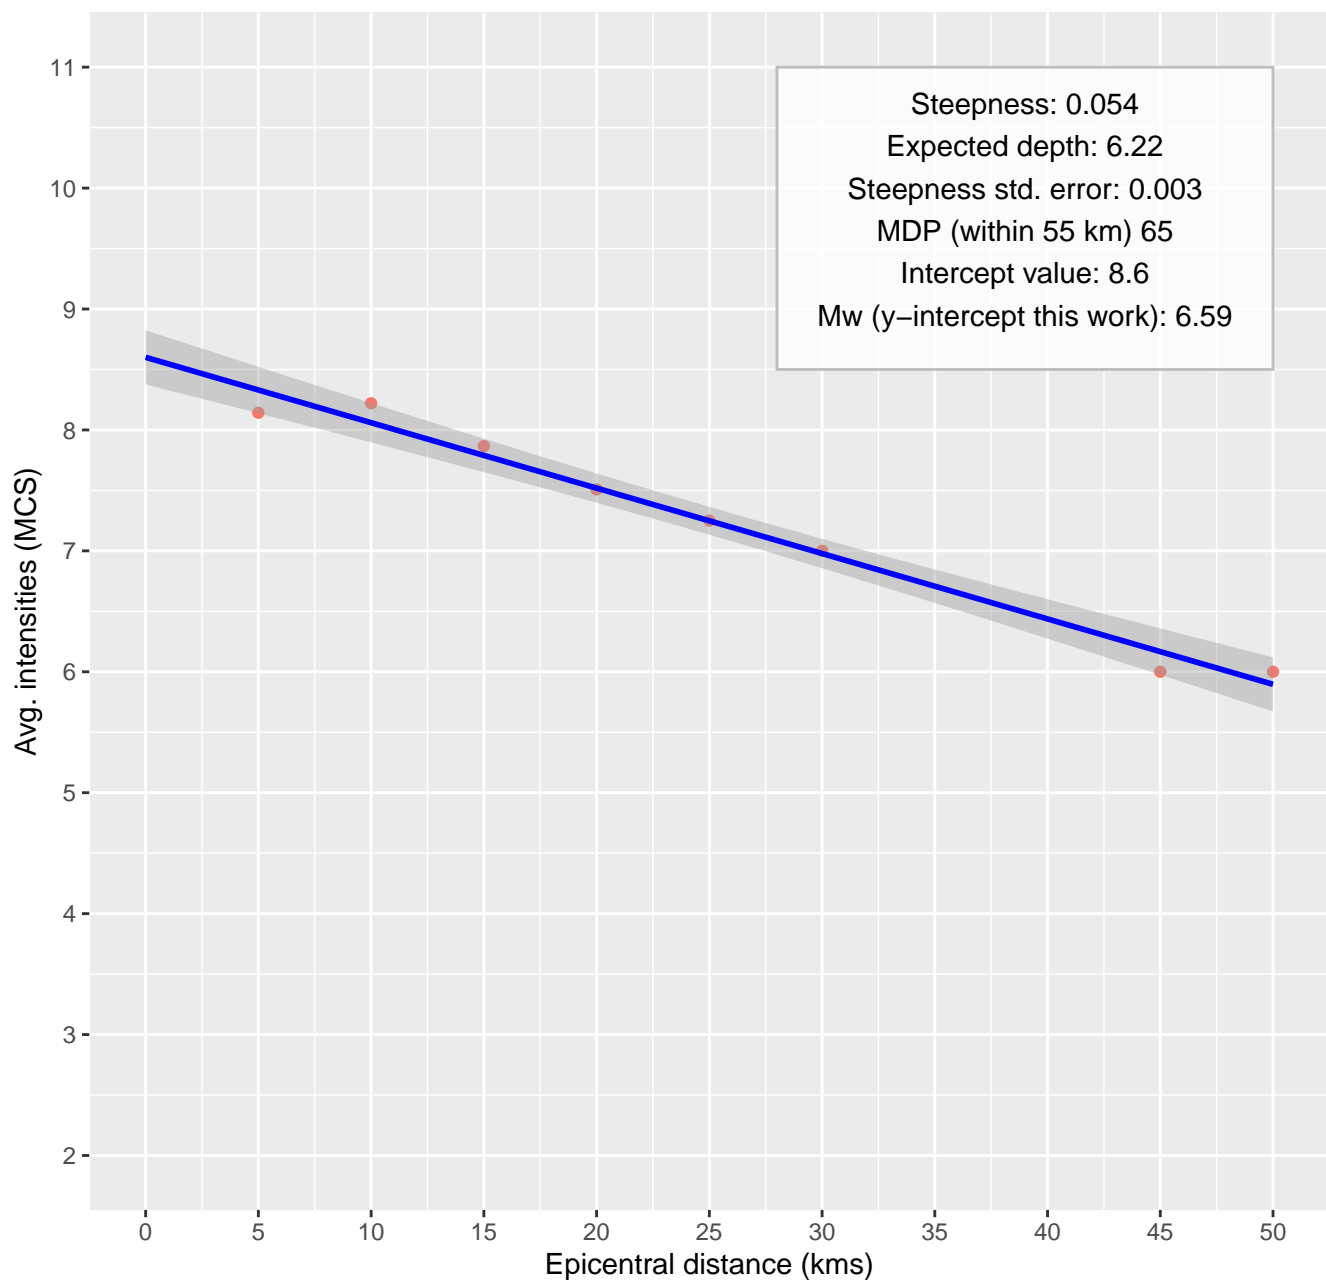

Supplement: Supplementary file 119 [file nhess-23-1007-2023-supplement.zip]

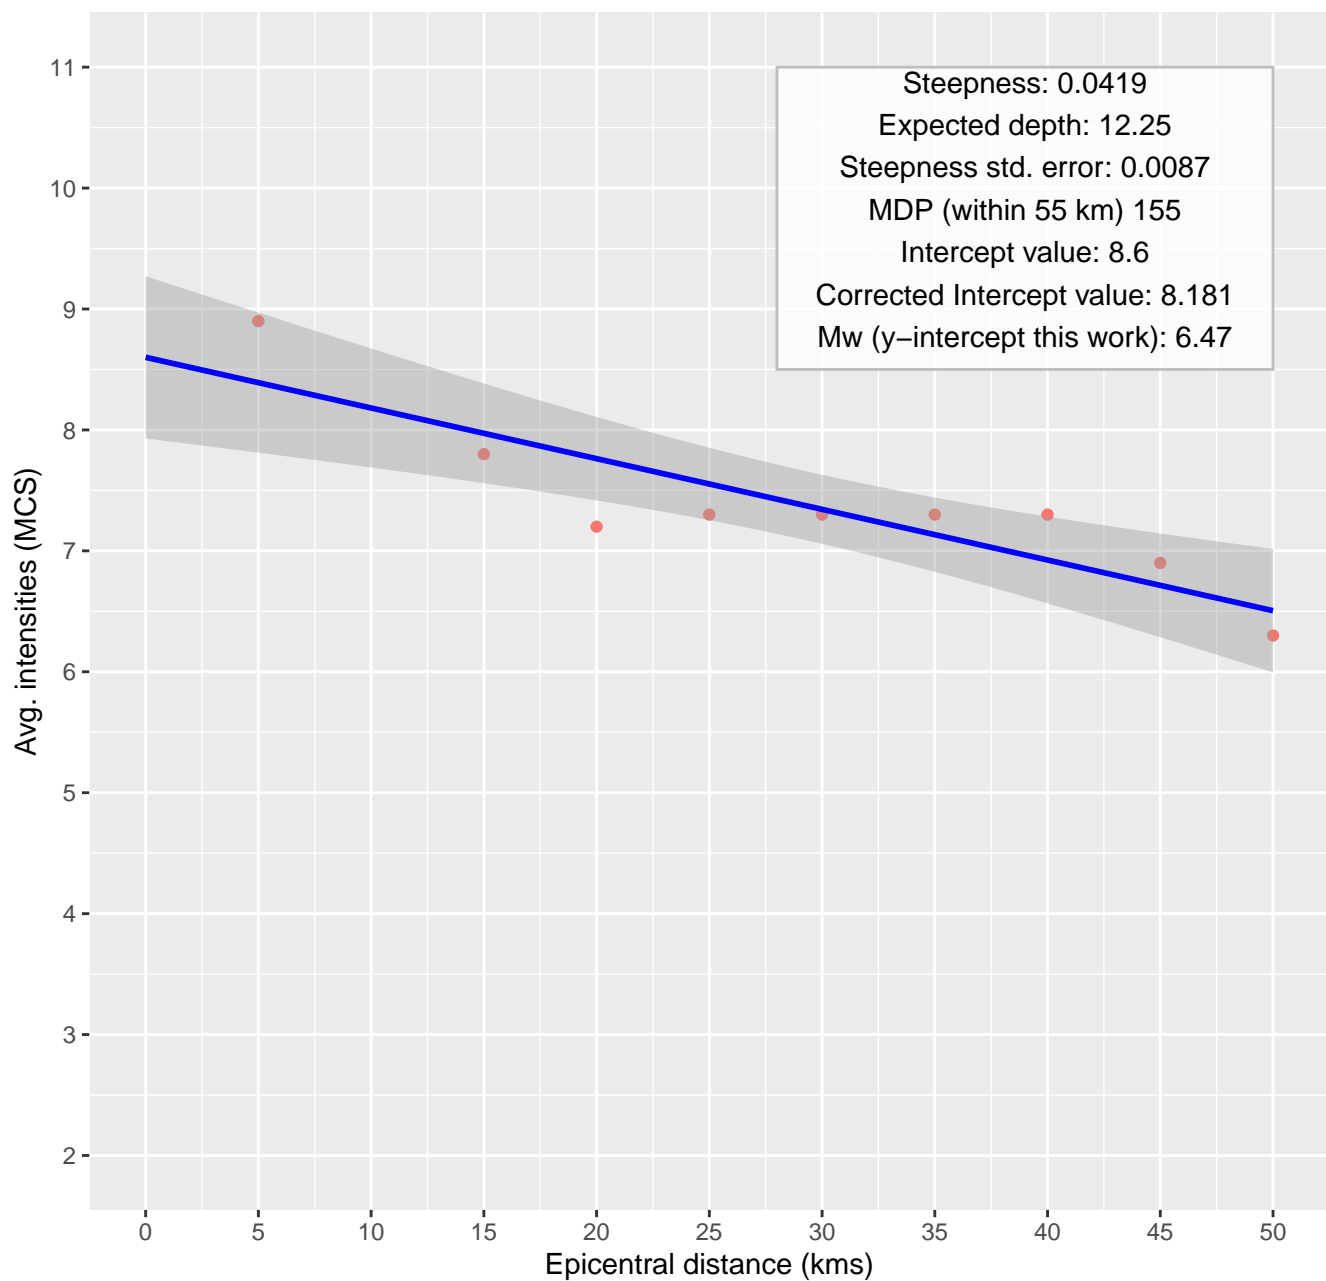

Supplement: Supplementary file 120 [file nhess-23-1007-2023-supplement.zip]

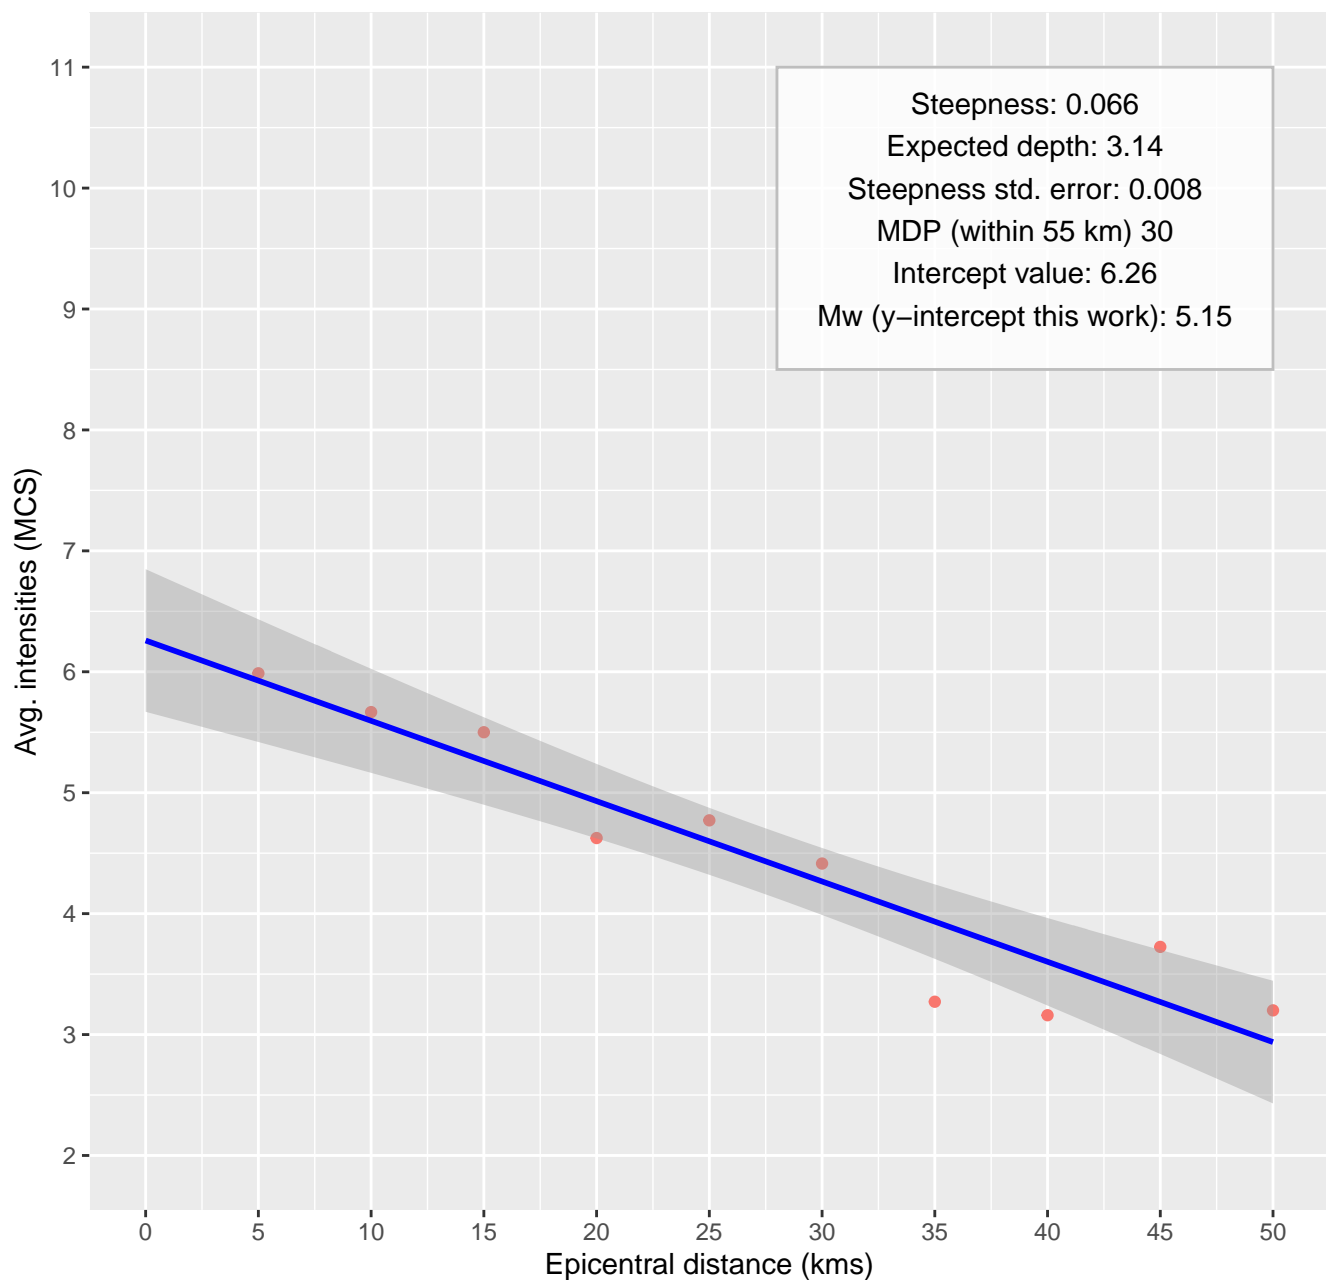

Supplement: Supplementary file 121 [file nhess-23-1007-2023-supplement.zip]

# DBMI\_ 16270730\_1050\_000 | 1627-07-30 – Capitanata

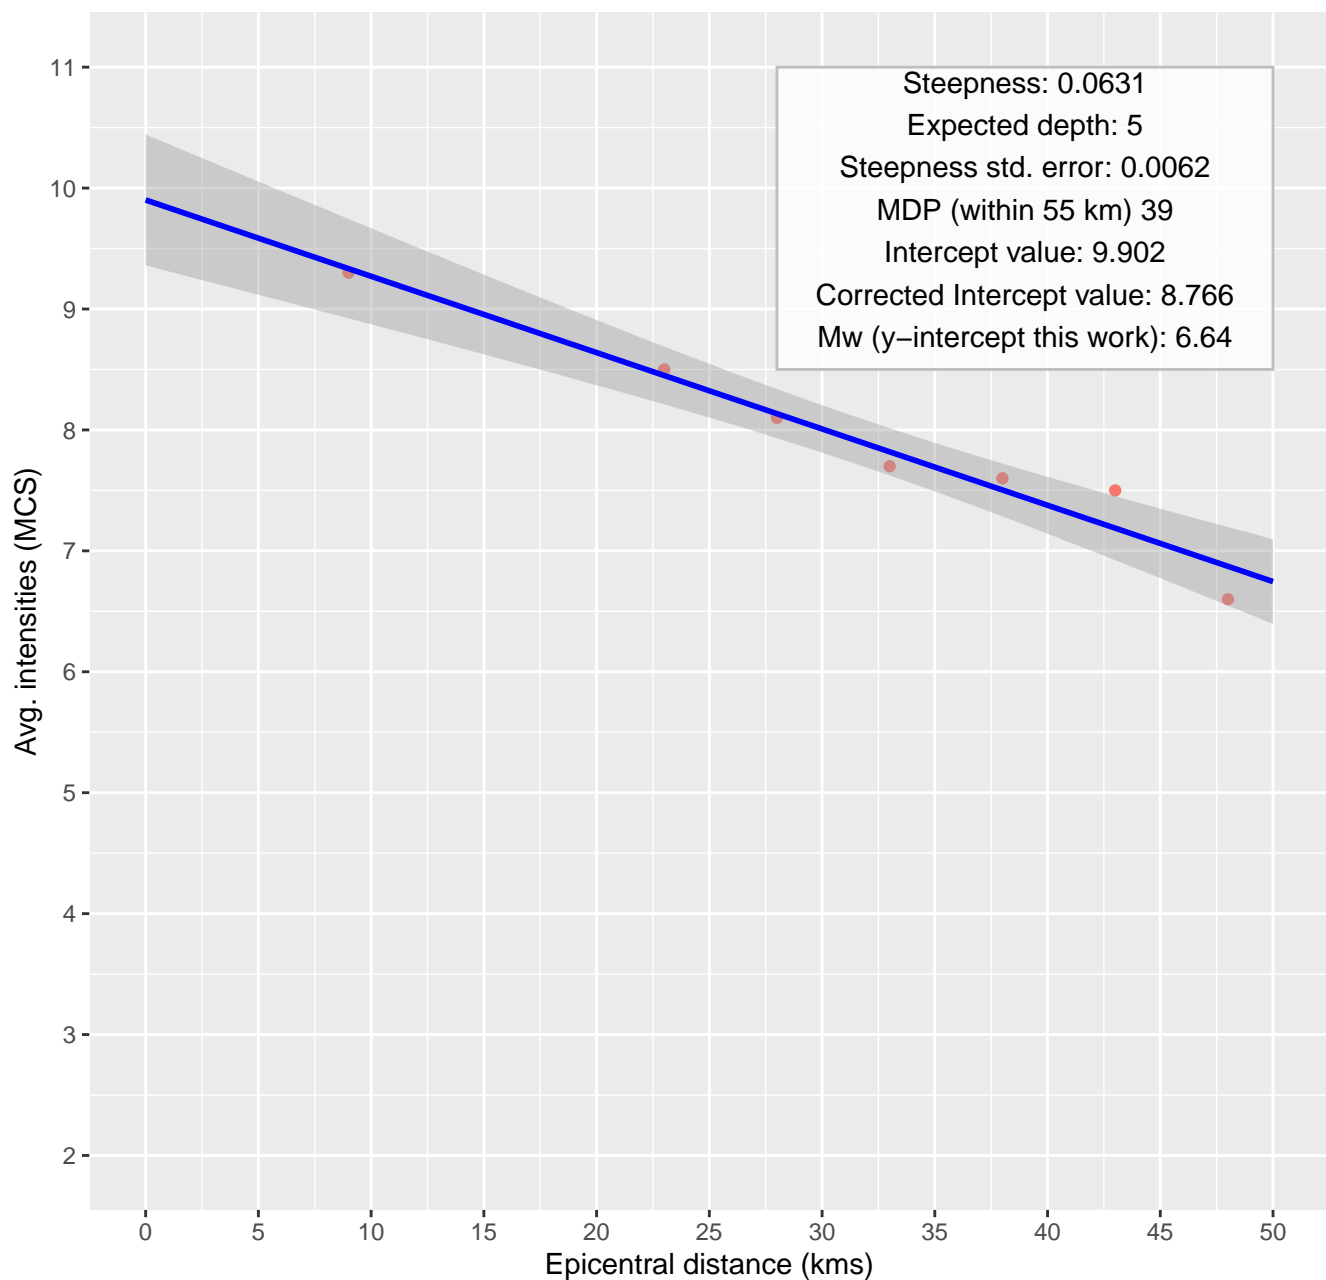

Supplement: Supplementary file 122 [file nhess-23-1007-2023-supplement.zip]

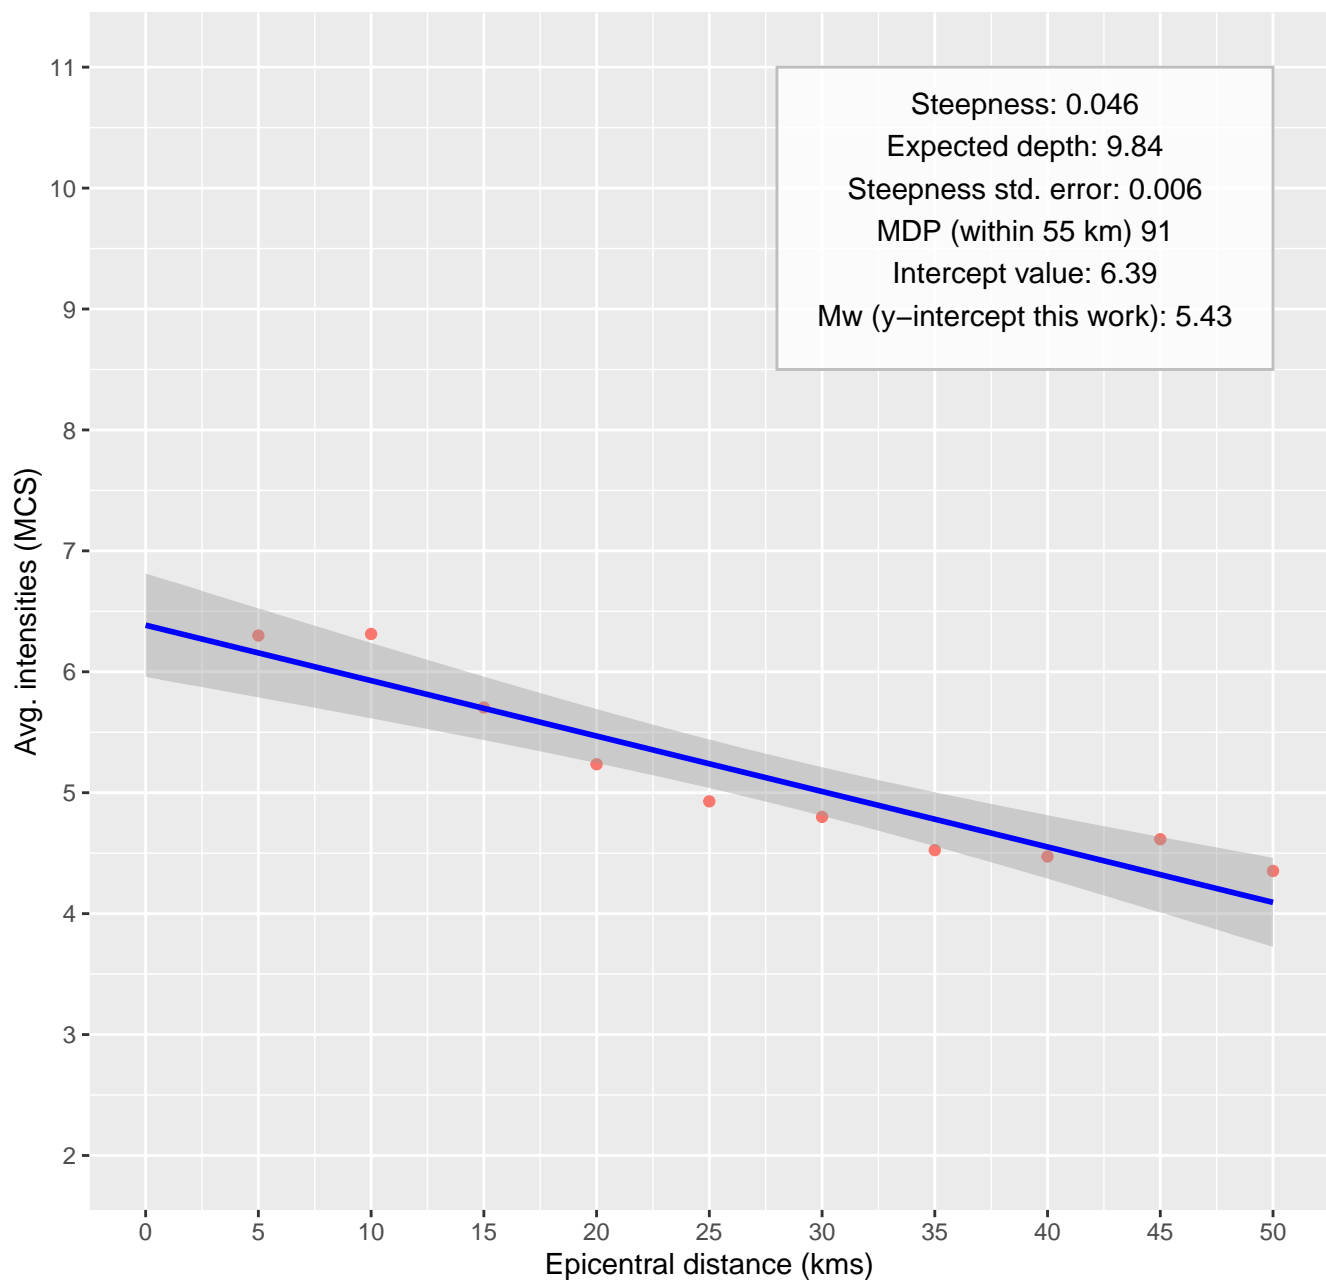

Supplement: Supplementary file 123 [file nhess-23-1007-2023-supplement.zip]

# DBMI\_ 19570430\_0605\_000 | 1957-04-30 – Alta Valtiberina

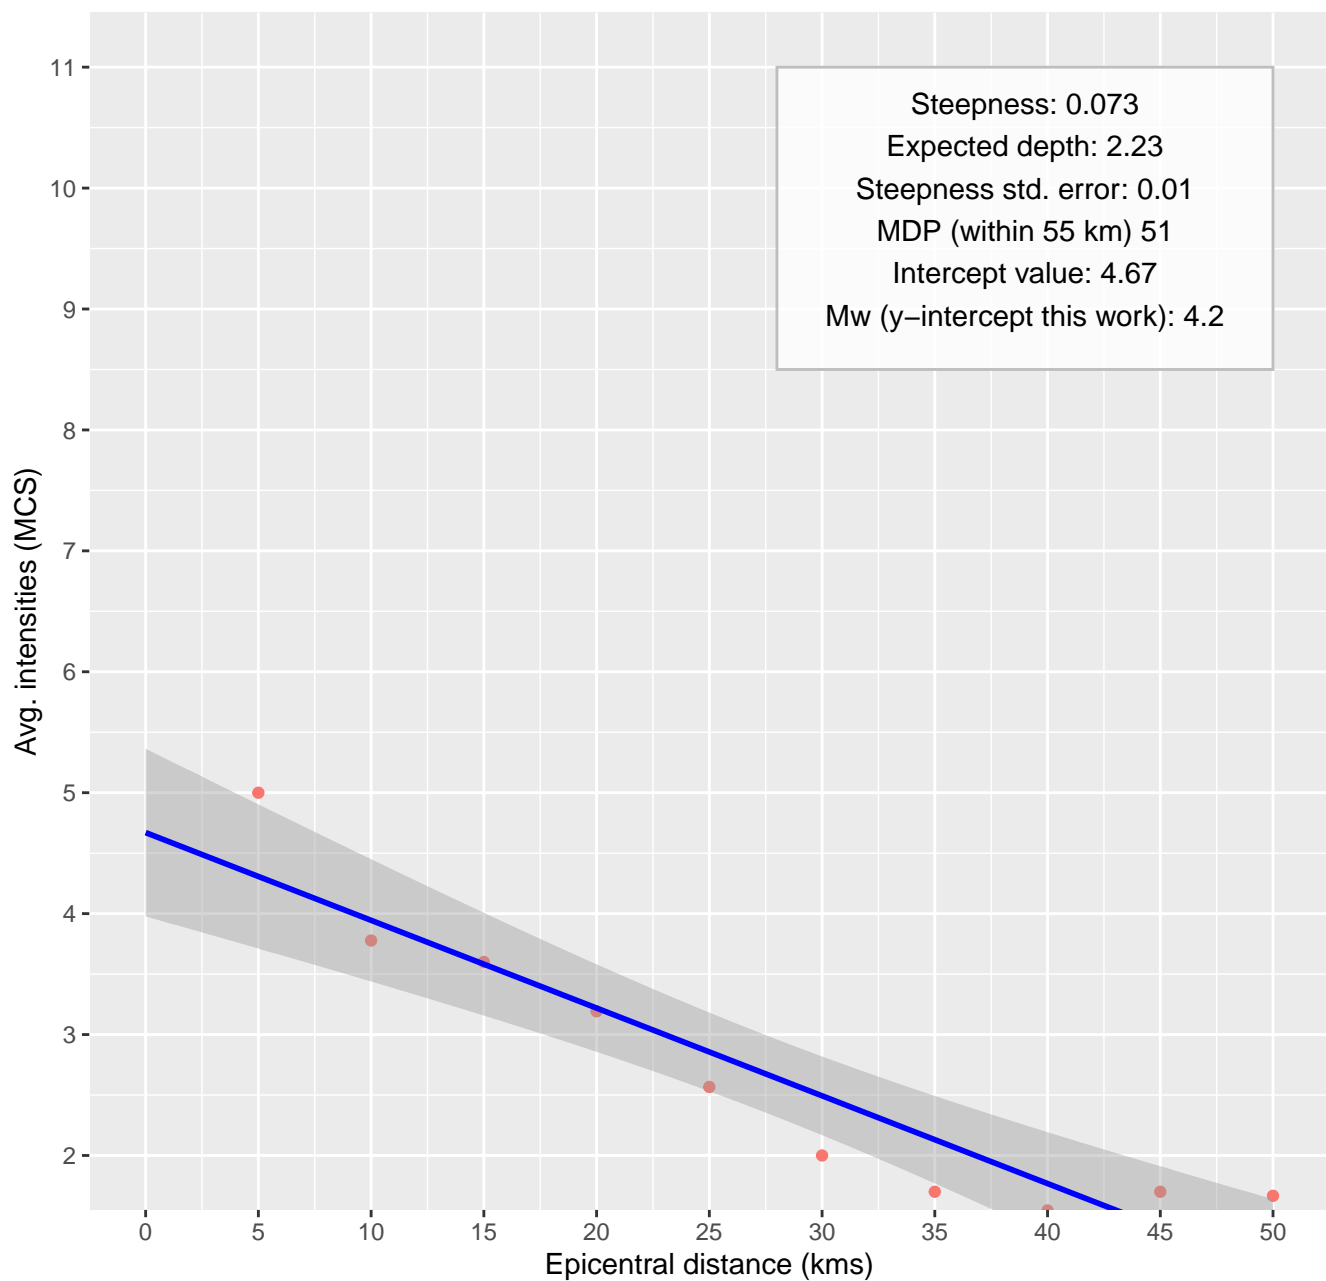

Supplement: Supplementary file 124 [file nhess-23-1007-2023-supplement.zip]

# DBMI\_ 19591223\_0929\_000 | 1959-12-23 – Piana di Catania

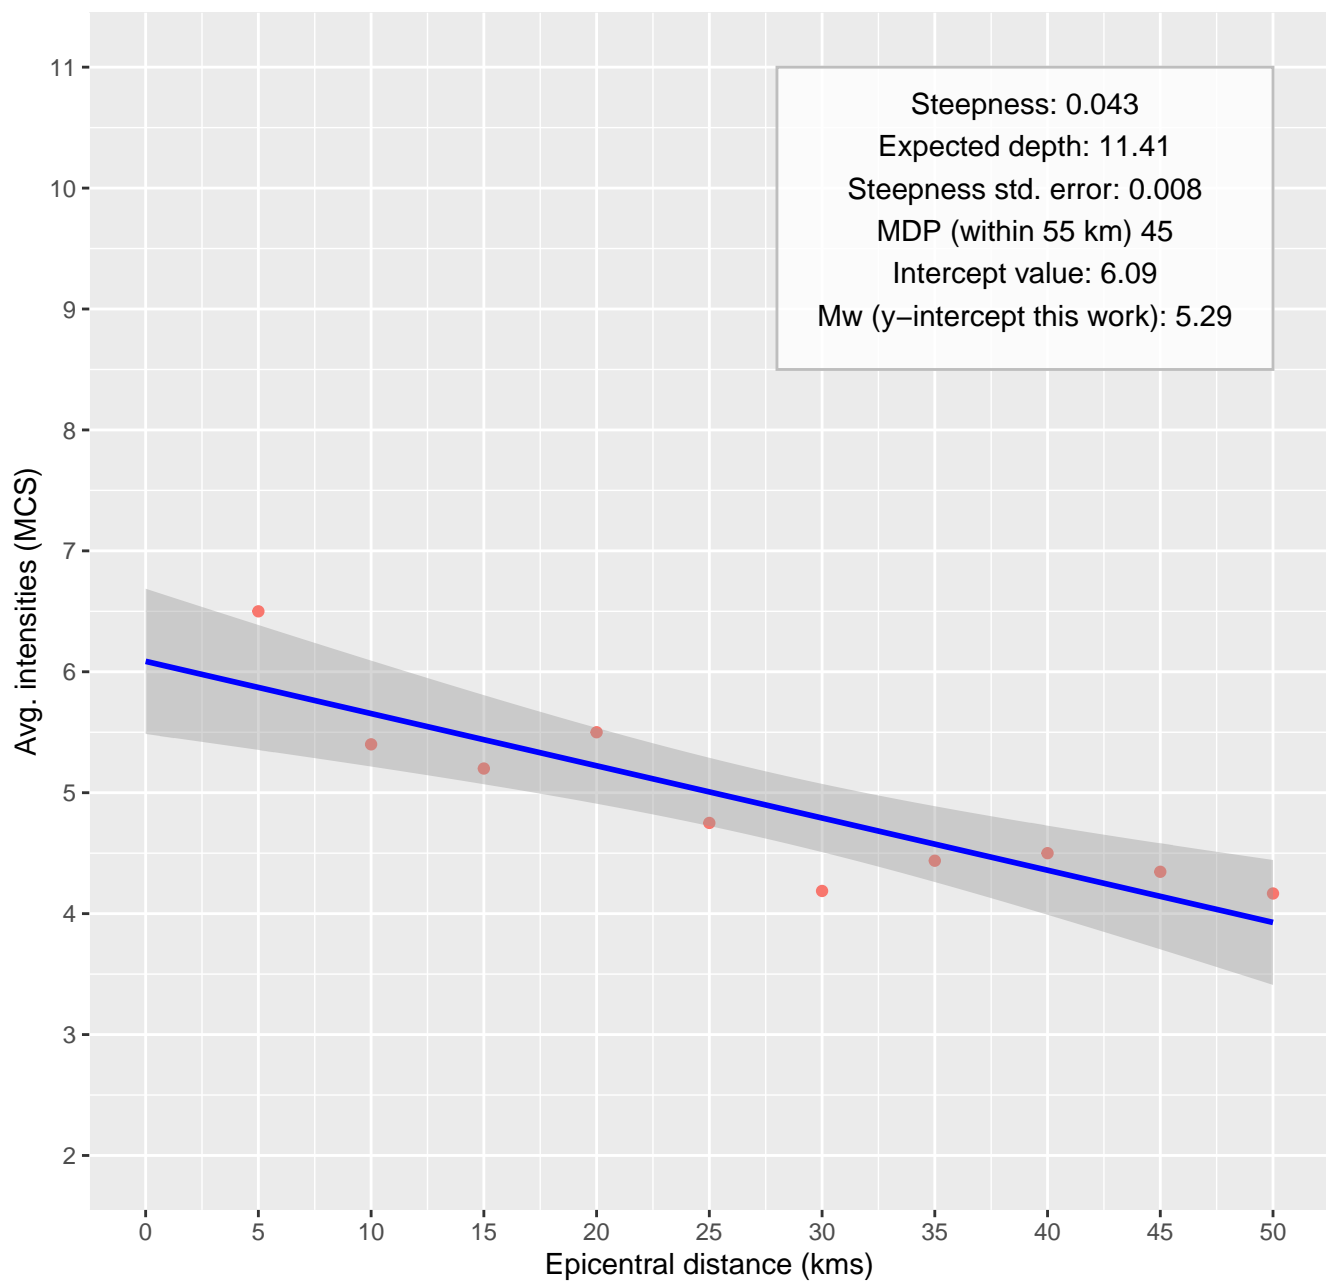

Supplement: Supplementary file 125 [file nhess-23-1007-2023-supplement.zip]

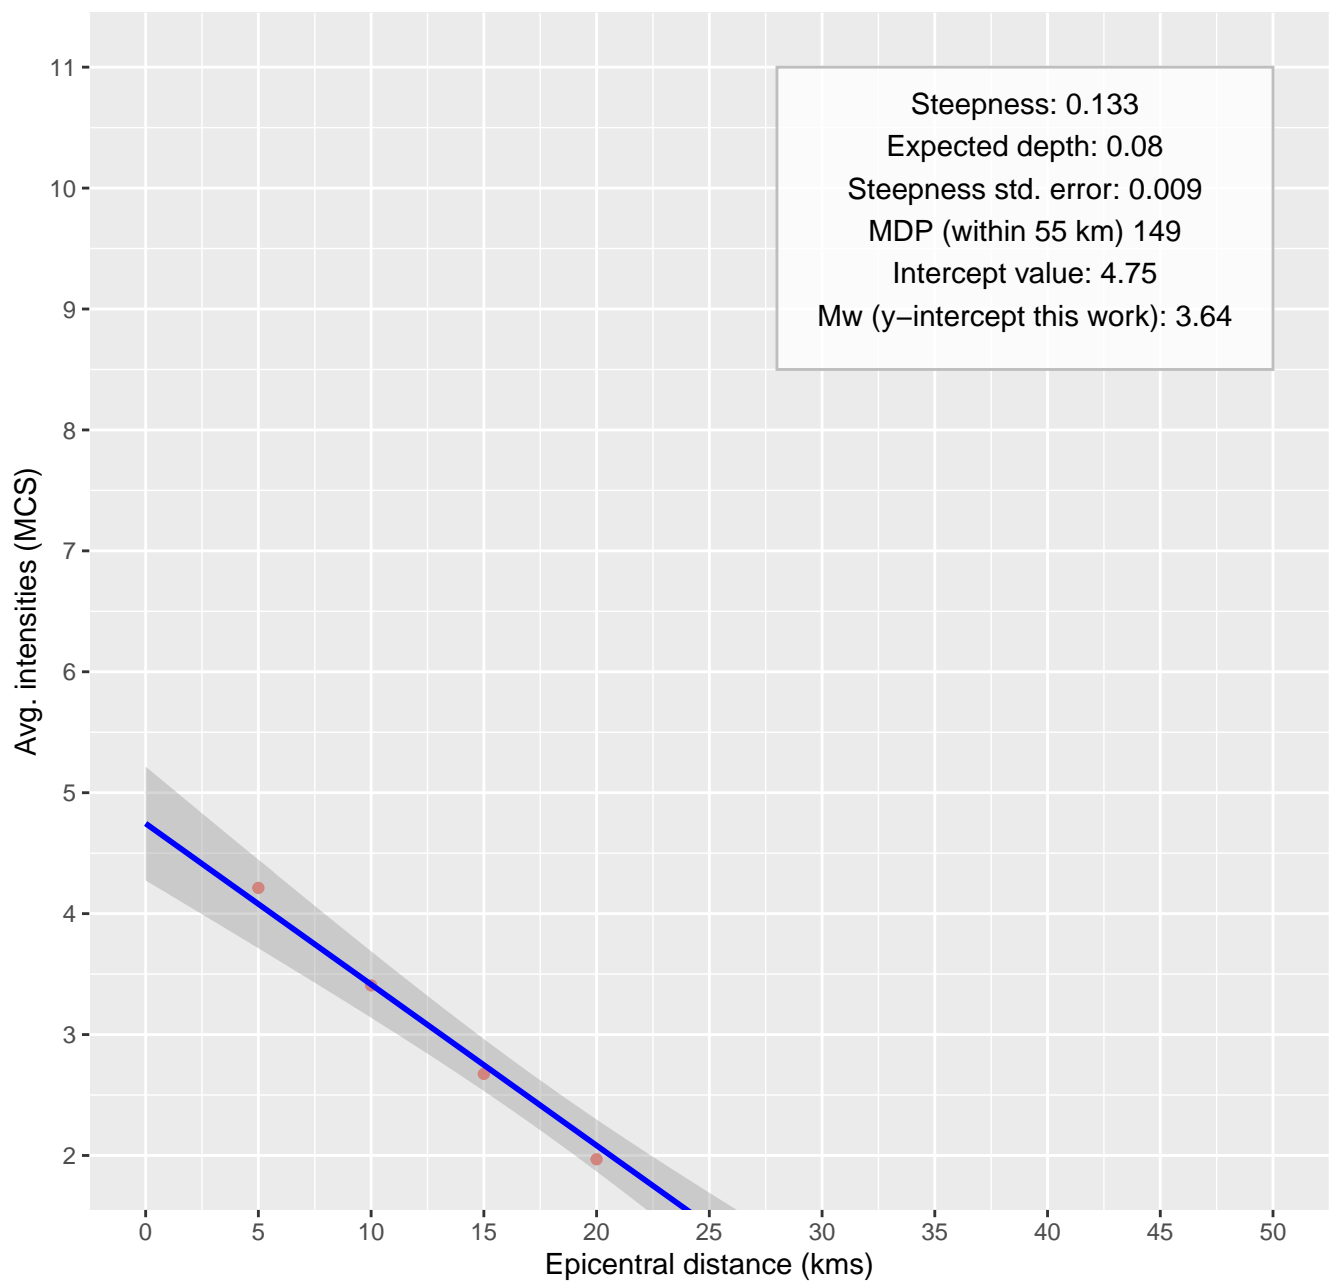

Supplement: Supplementary file 126 [file nhess-23-1007-2023-supplement.zip]

# DBMI\_ 19130721\_2235\_000 | 1913-07-21 – Appennino romagnolo

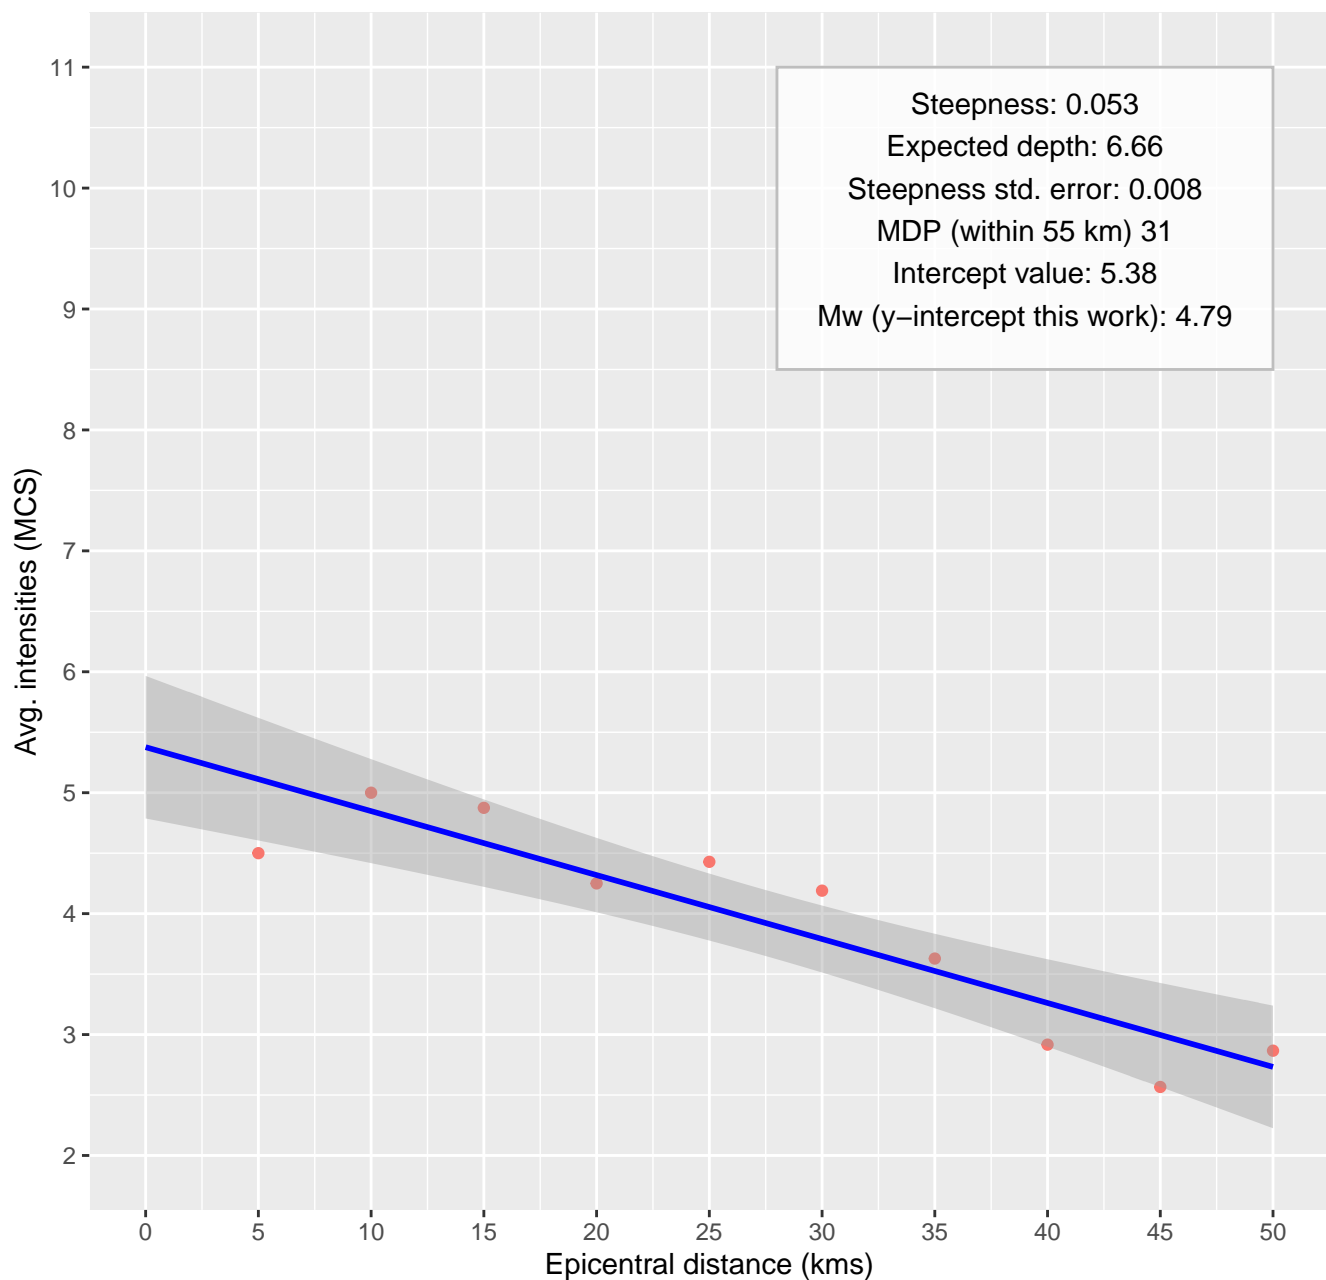

Supplement: Supplementary file 127 [file nhess-23-1007-2023-supplement.zip]

# DBMI\_ 19011030\_1449\_000 | 1901-10-30 – Garda occidentale

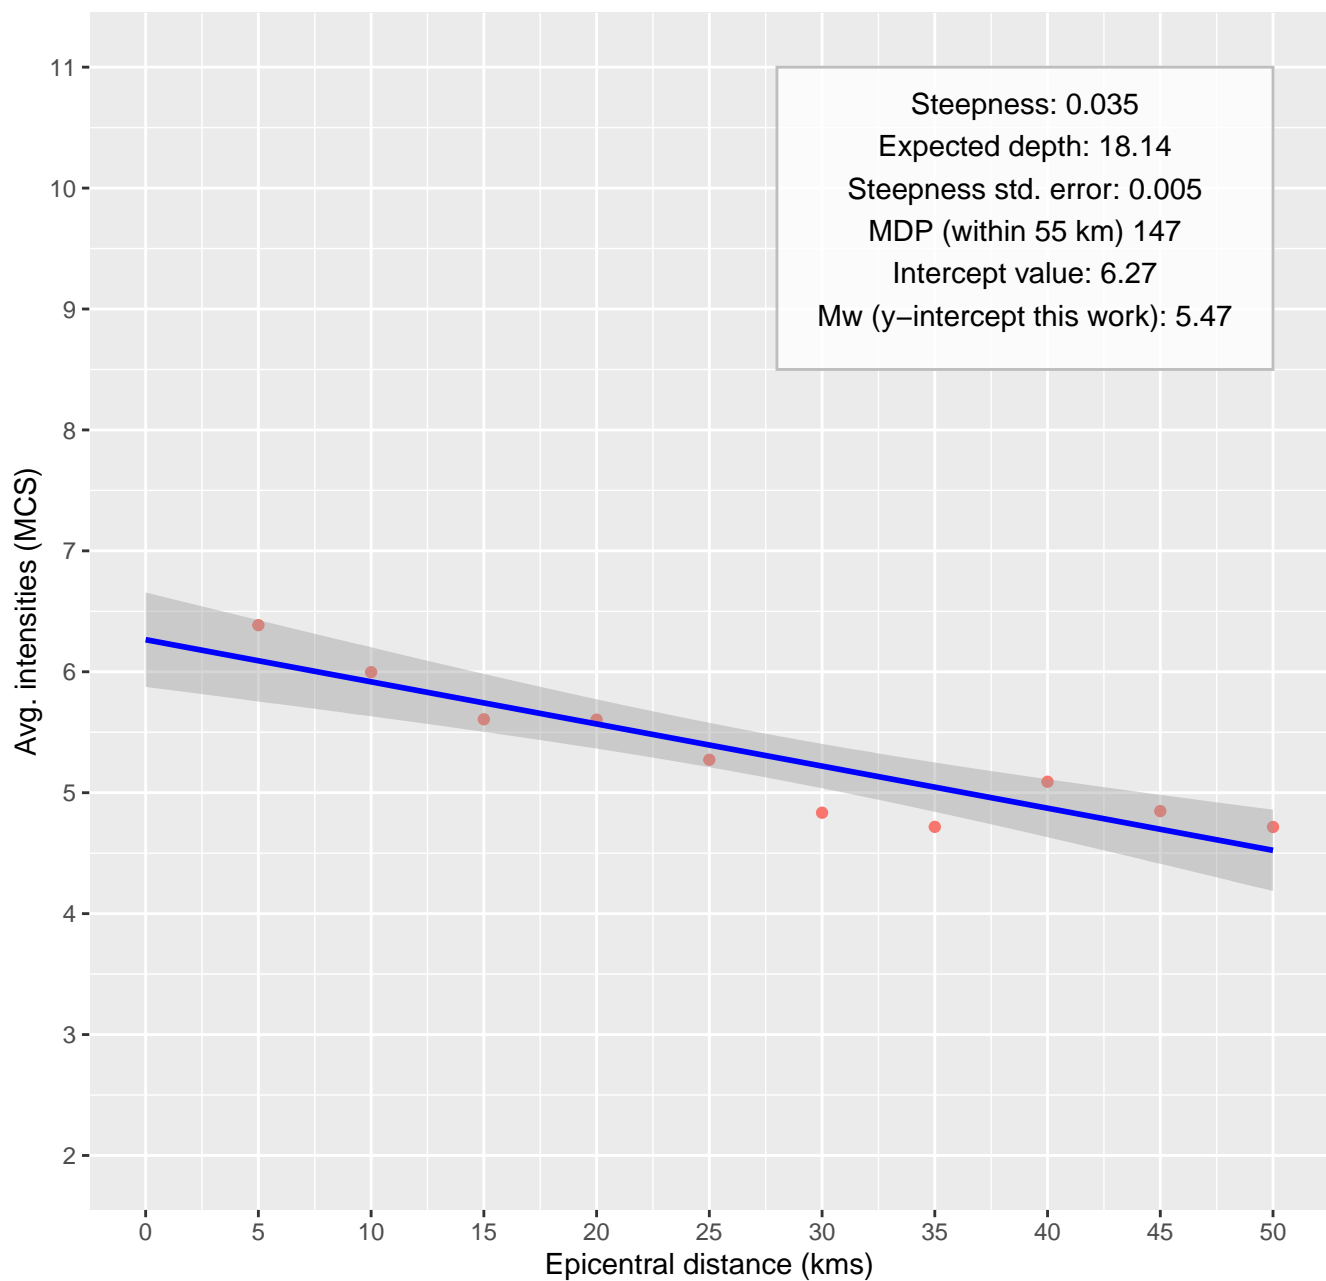

Supplement: Supplementary file 128 [file nhess-23-1007-2023-supplement.zip]

# DBMI\_ 19790209\_1444\_000 | 1979-02-09 – Bergamasco

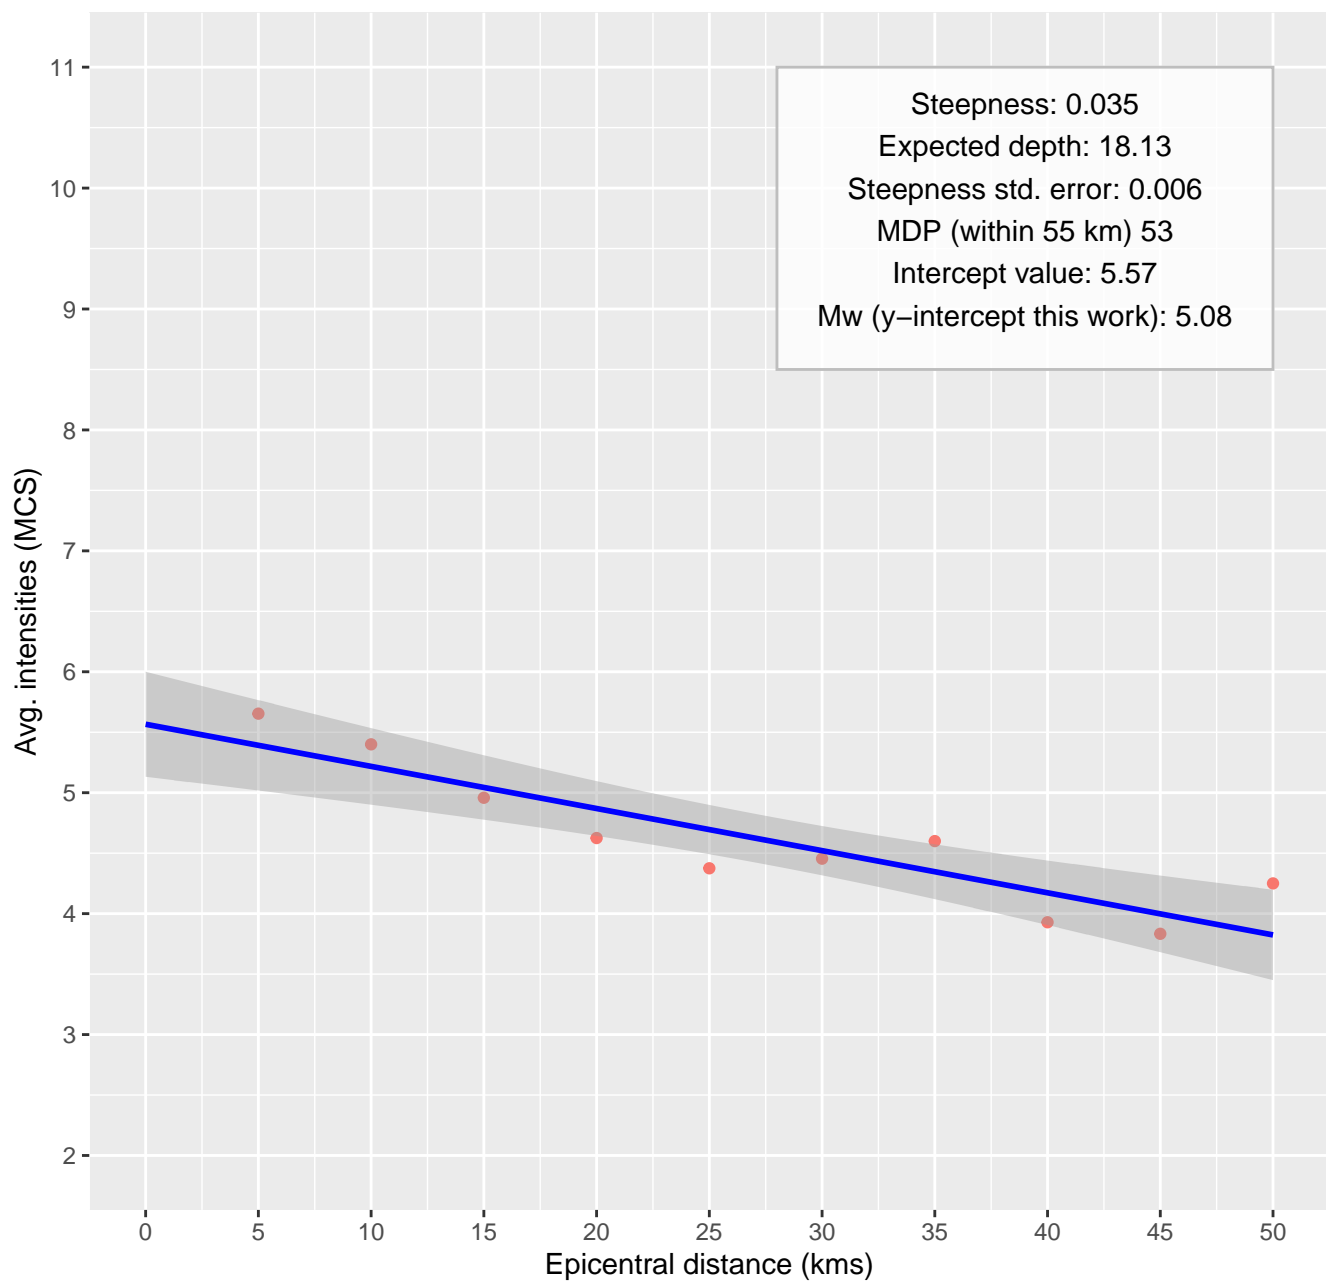

Supplement: Supplementary file 129 [file nhess-23-1007-2023-supplement.zip]

# DBMI\_ 19770724\_0955\_000 | 1977-07-24 – Irpinia

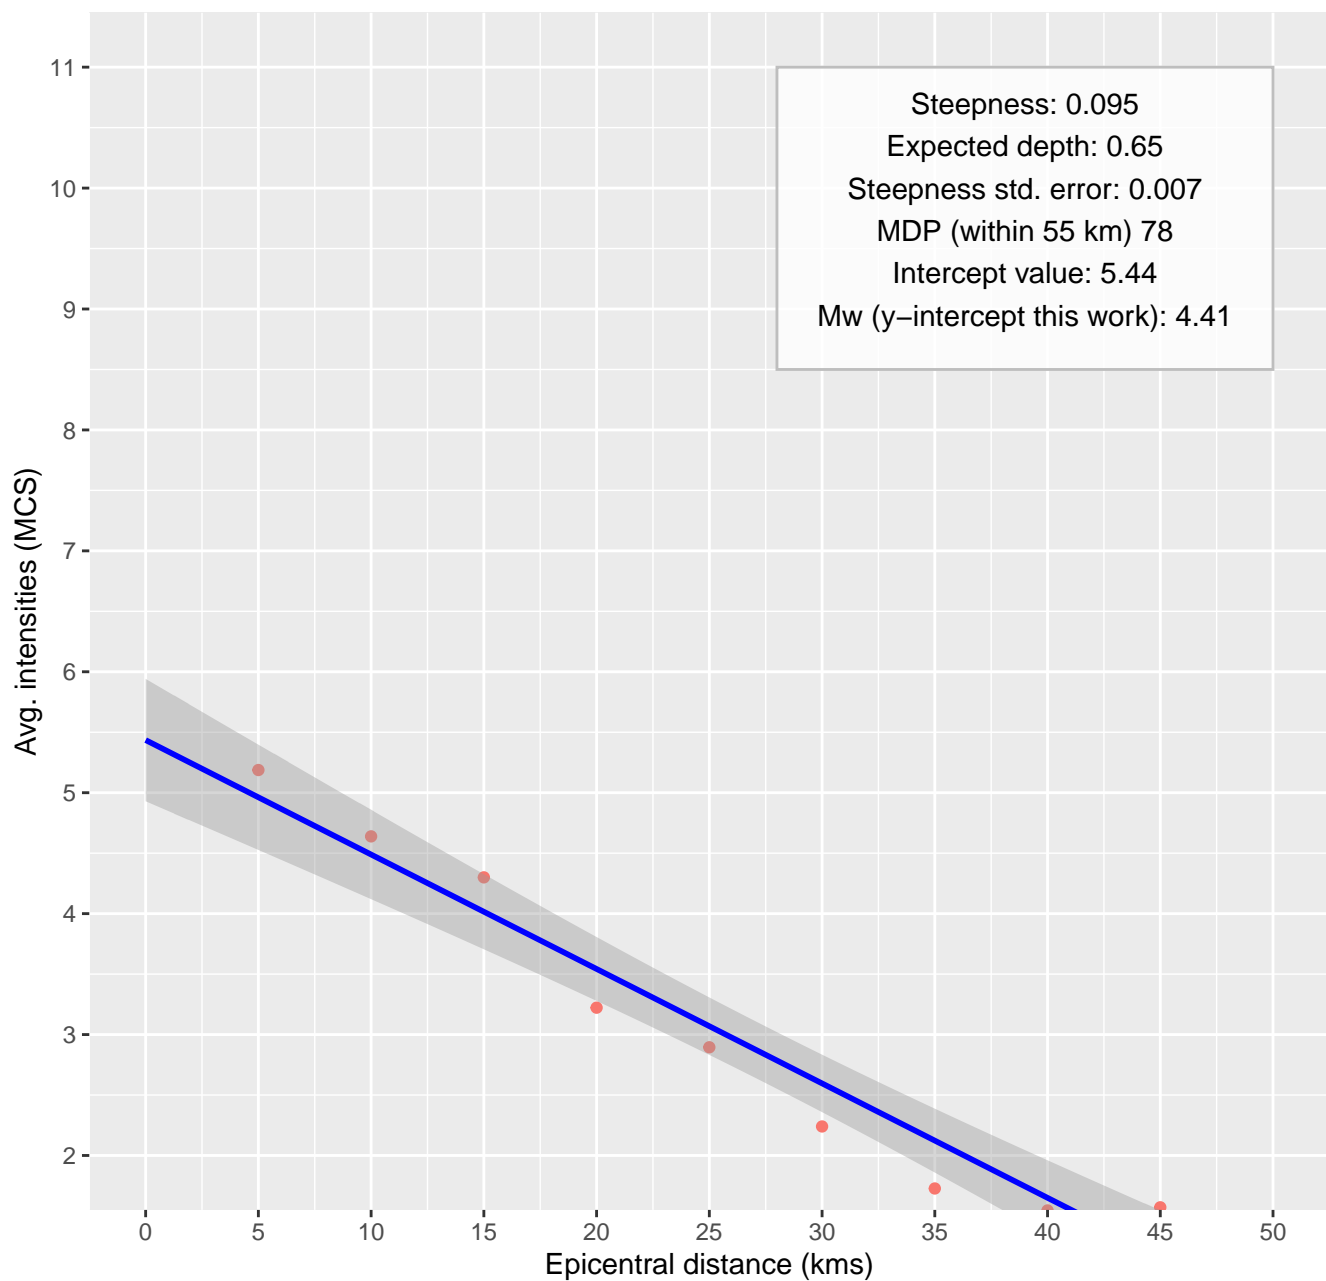

Supplement: Supplementary file 130 [file nhess-23-1007-2023-supplement.zip]

# DBMI\_ 19290420\_0109\_000 | 1929-04-20 – Bolognese

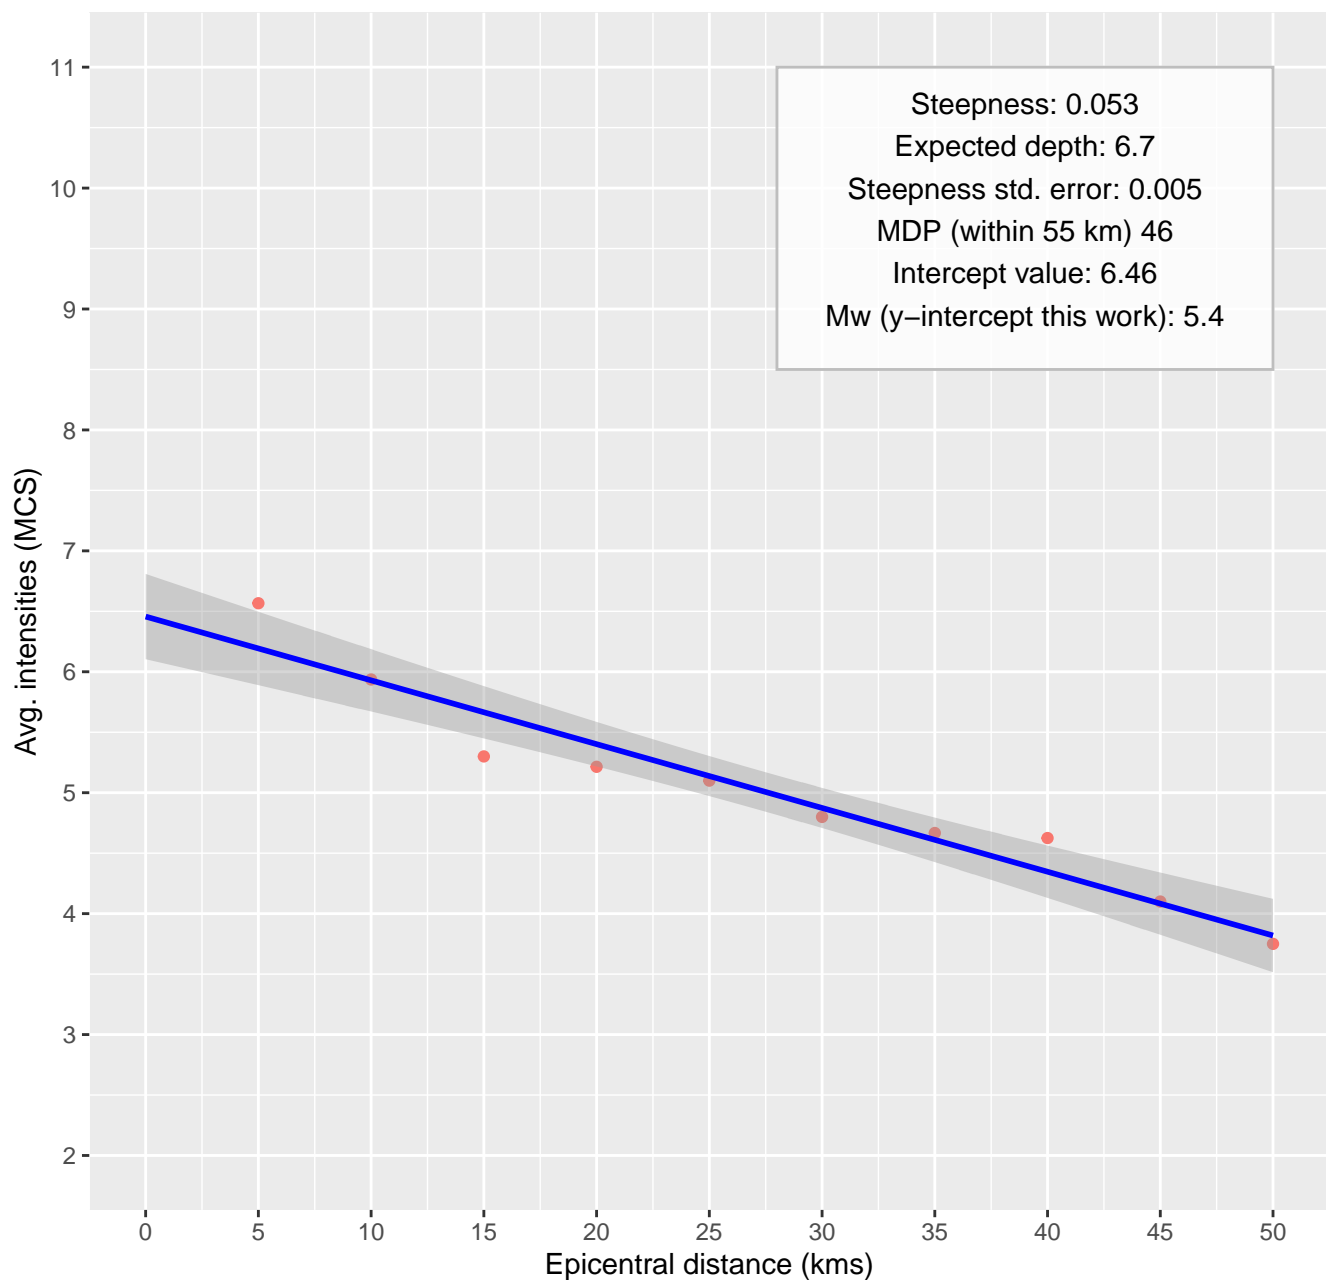

Supplement: Supplementary file 131 [file nhess-23-1007-2023-supplement.zip]

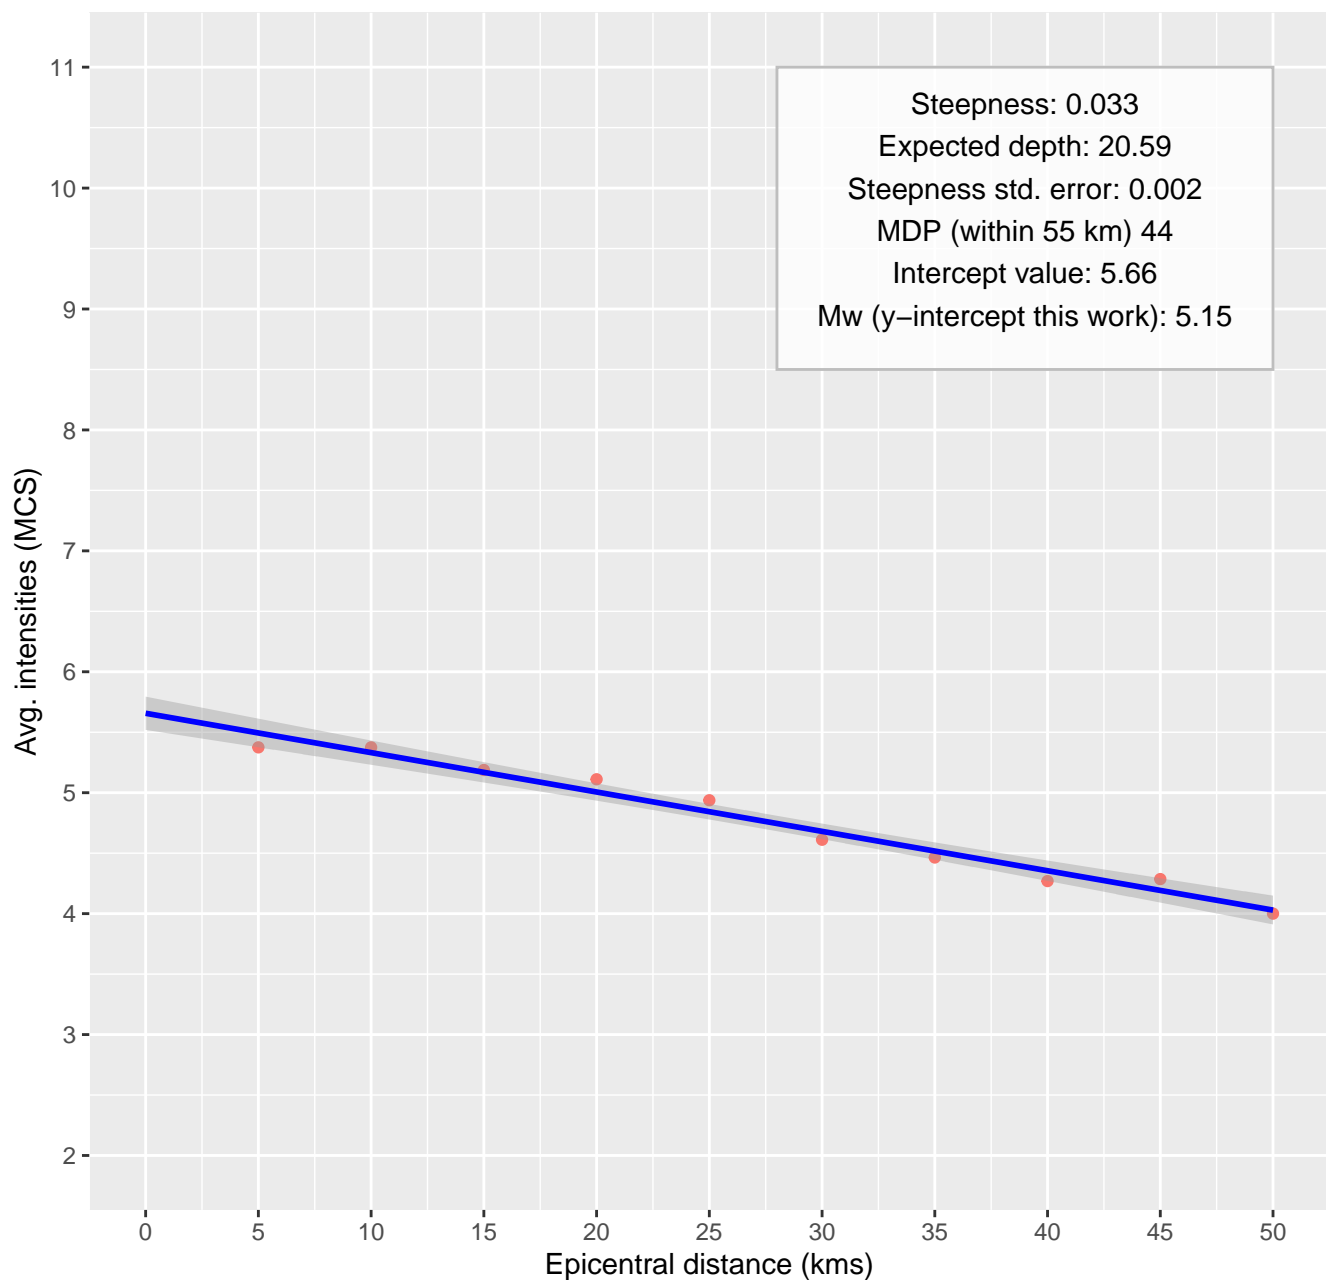

Supplement: Supplementary file 132 [file nhess-23-1007-2023-supplement.zip]

# DBMI\_ 17030202\_1105\_000 | 1703-02-02 – Aquilano

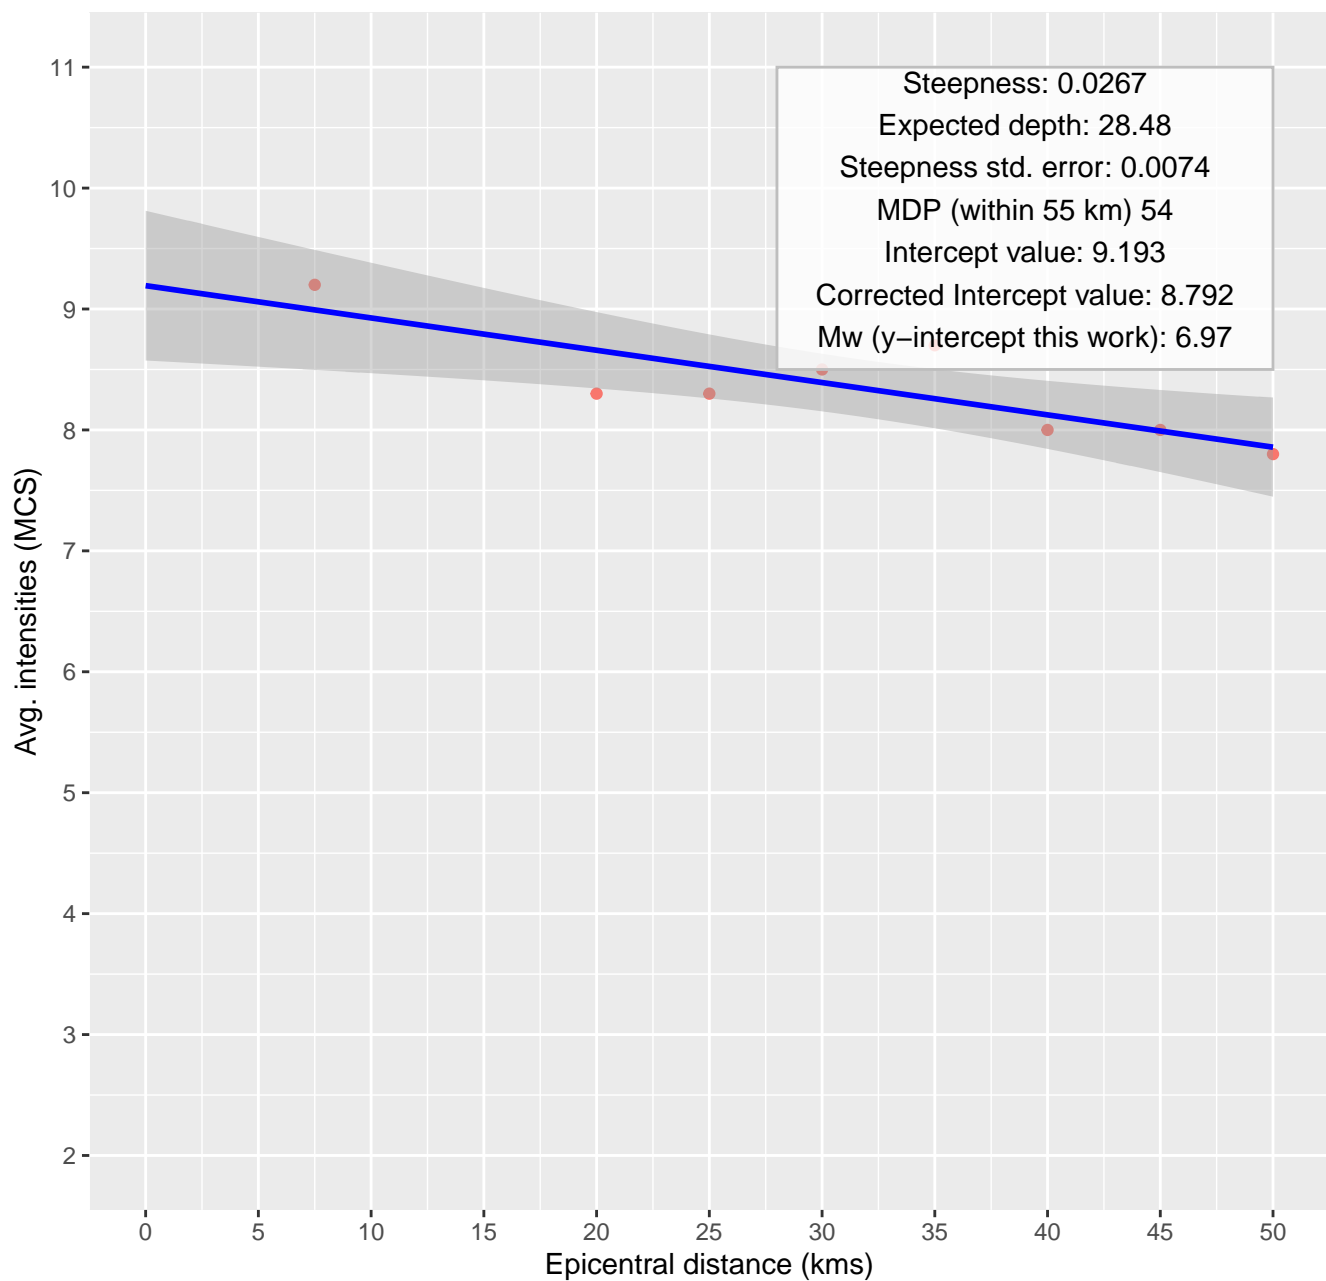

Supplement: Supplementary file 133 [file nhess-23-1007-2023-supplement.zip]

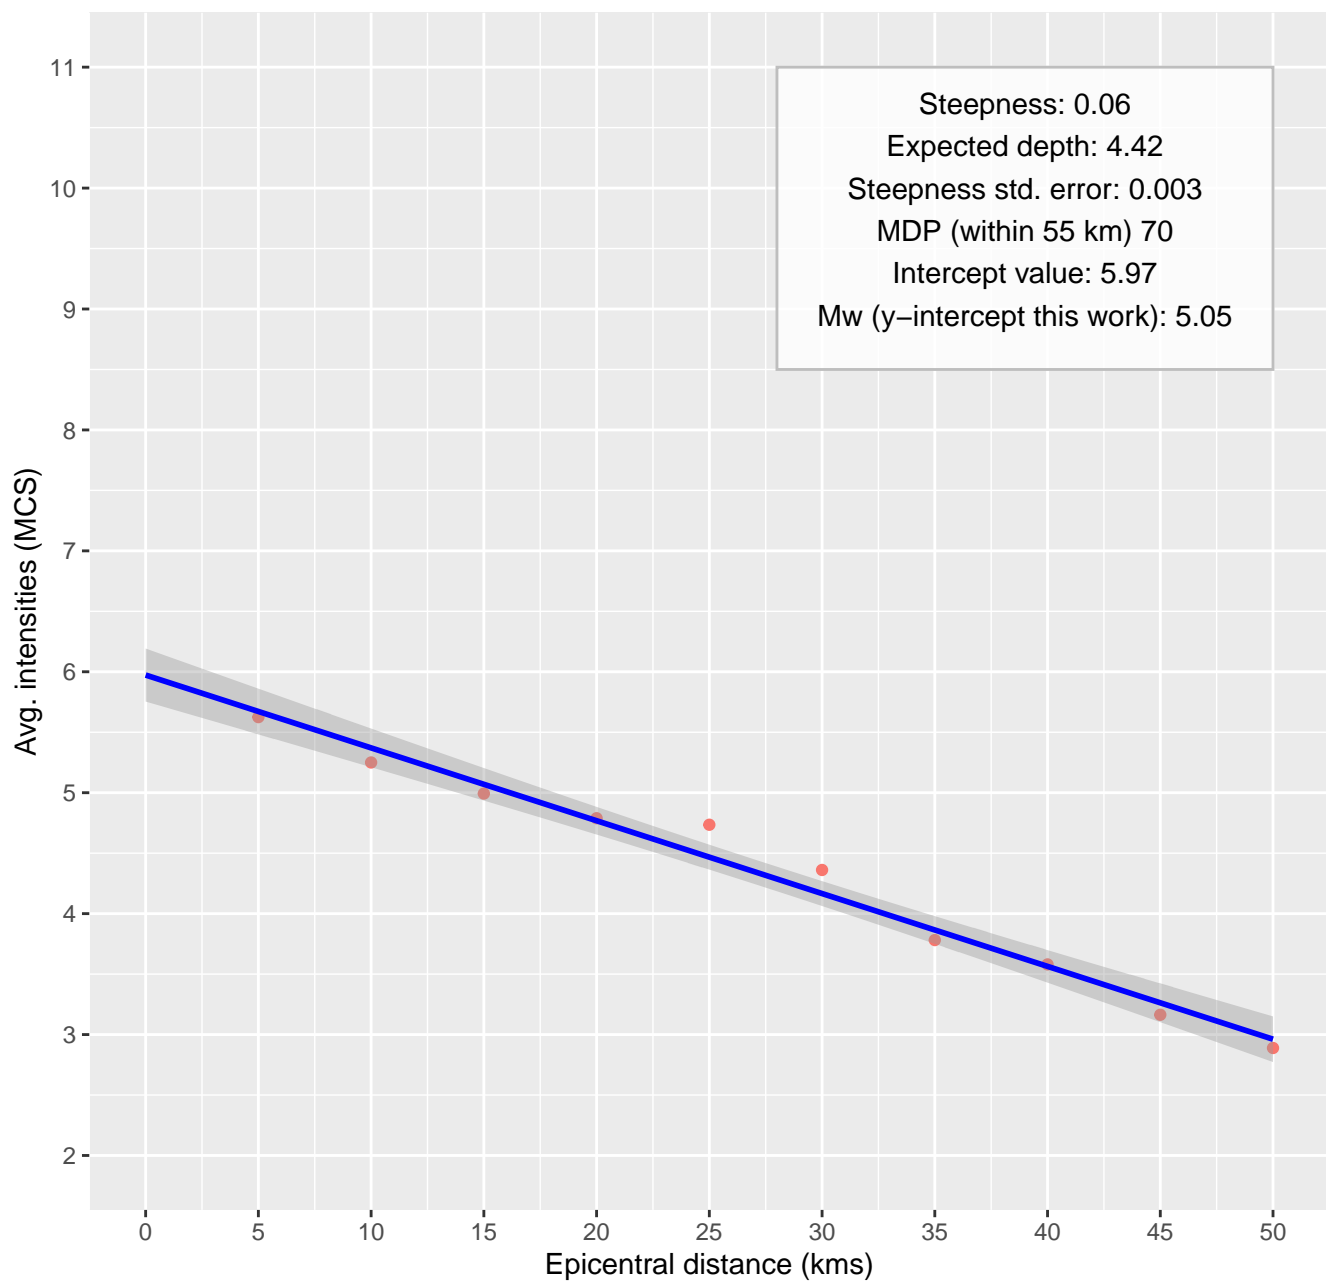

Supplement: Supplementary file 134 [file nhess-23-1007-2023-supplement.zip]

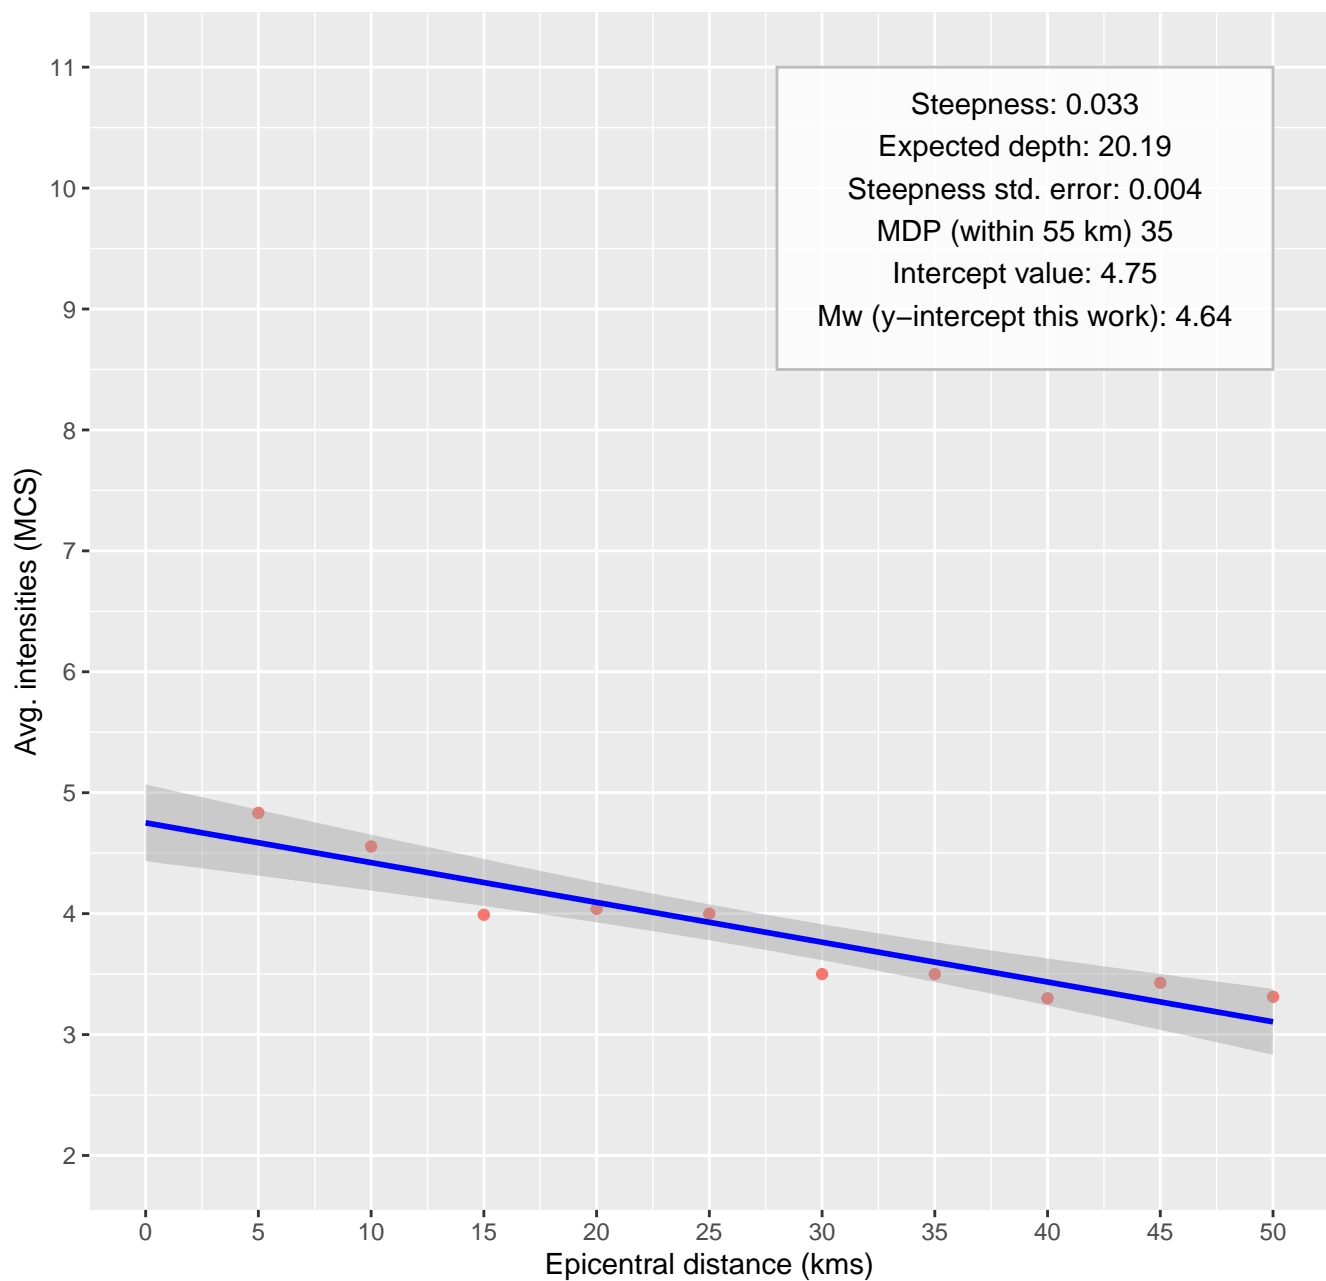

Supplement: Supplementary file 135 [file nhess-23-1007-2023-supplement.zip]

# DBMI\_ 19800607\_1835\_000 | 1980-06-07 – Garfagnana

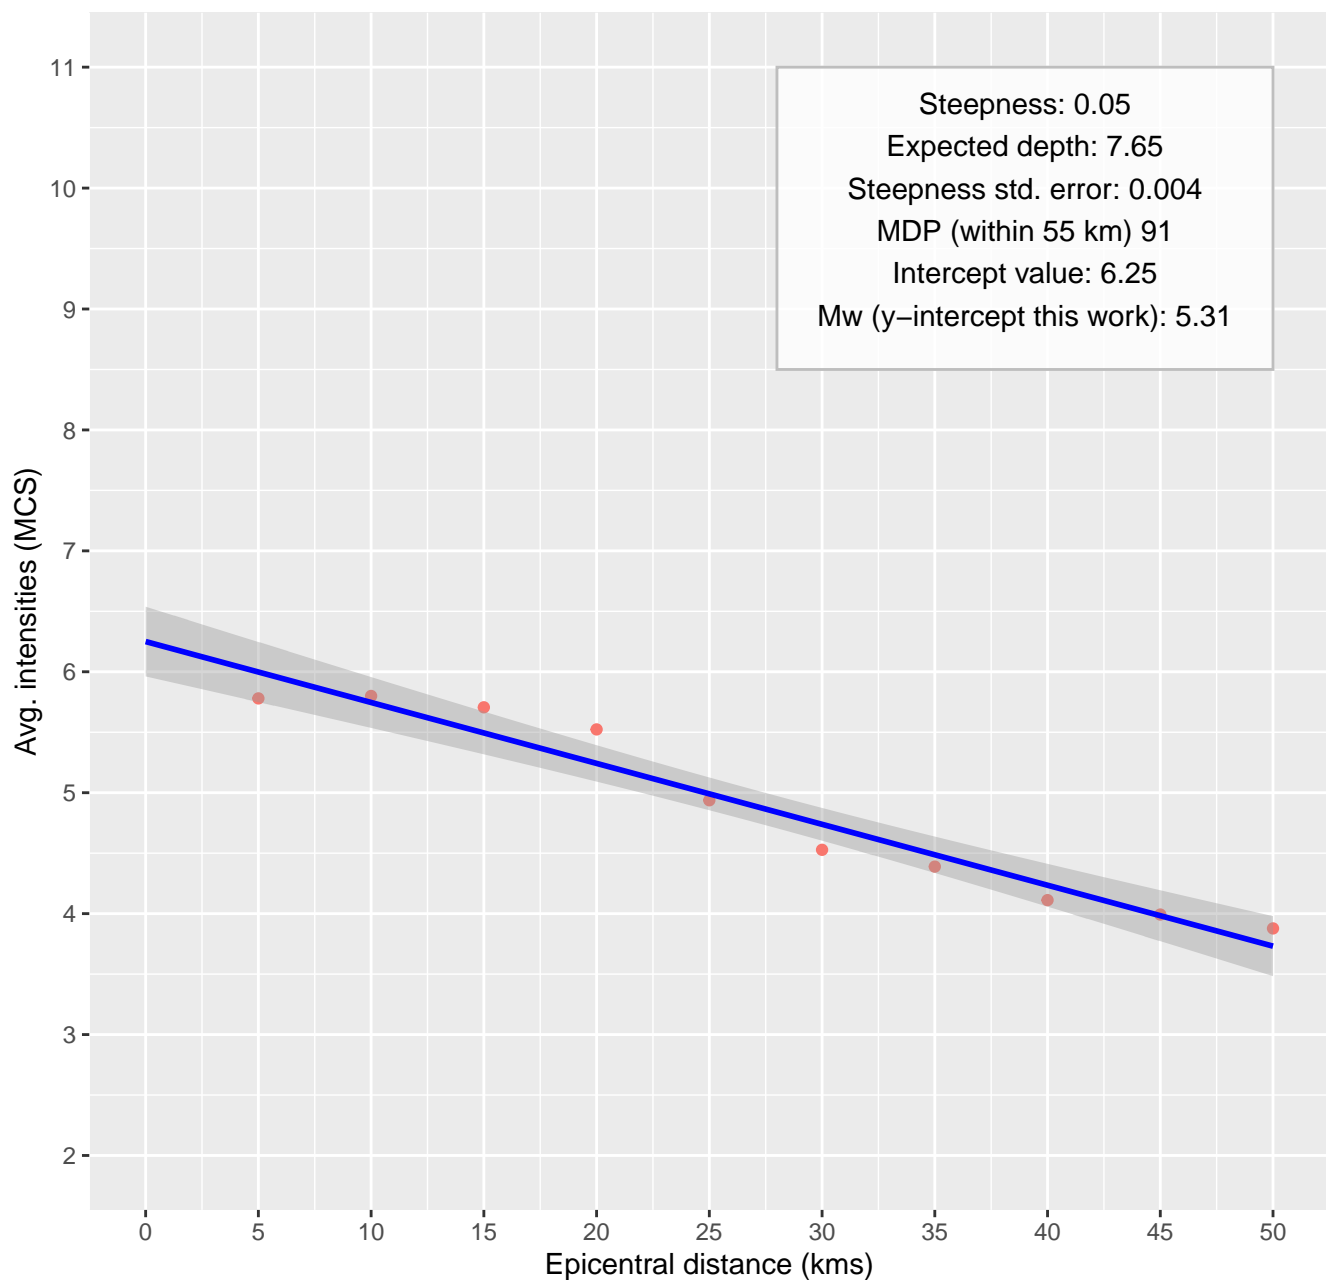

Supplement: Supplementary file 136 [file nhess-23-1007-2023-supplement.zip]

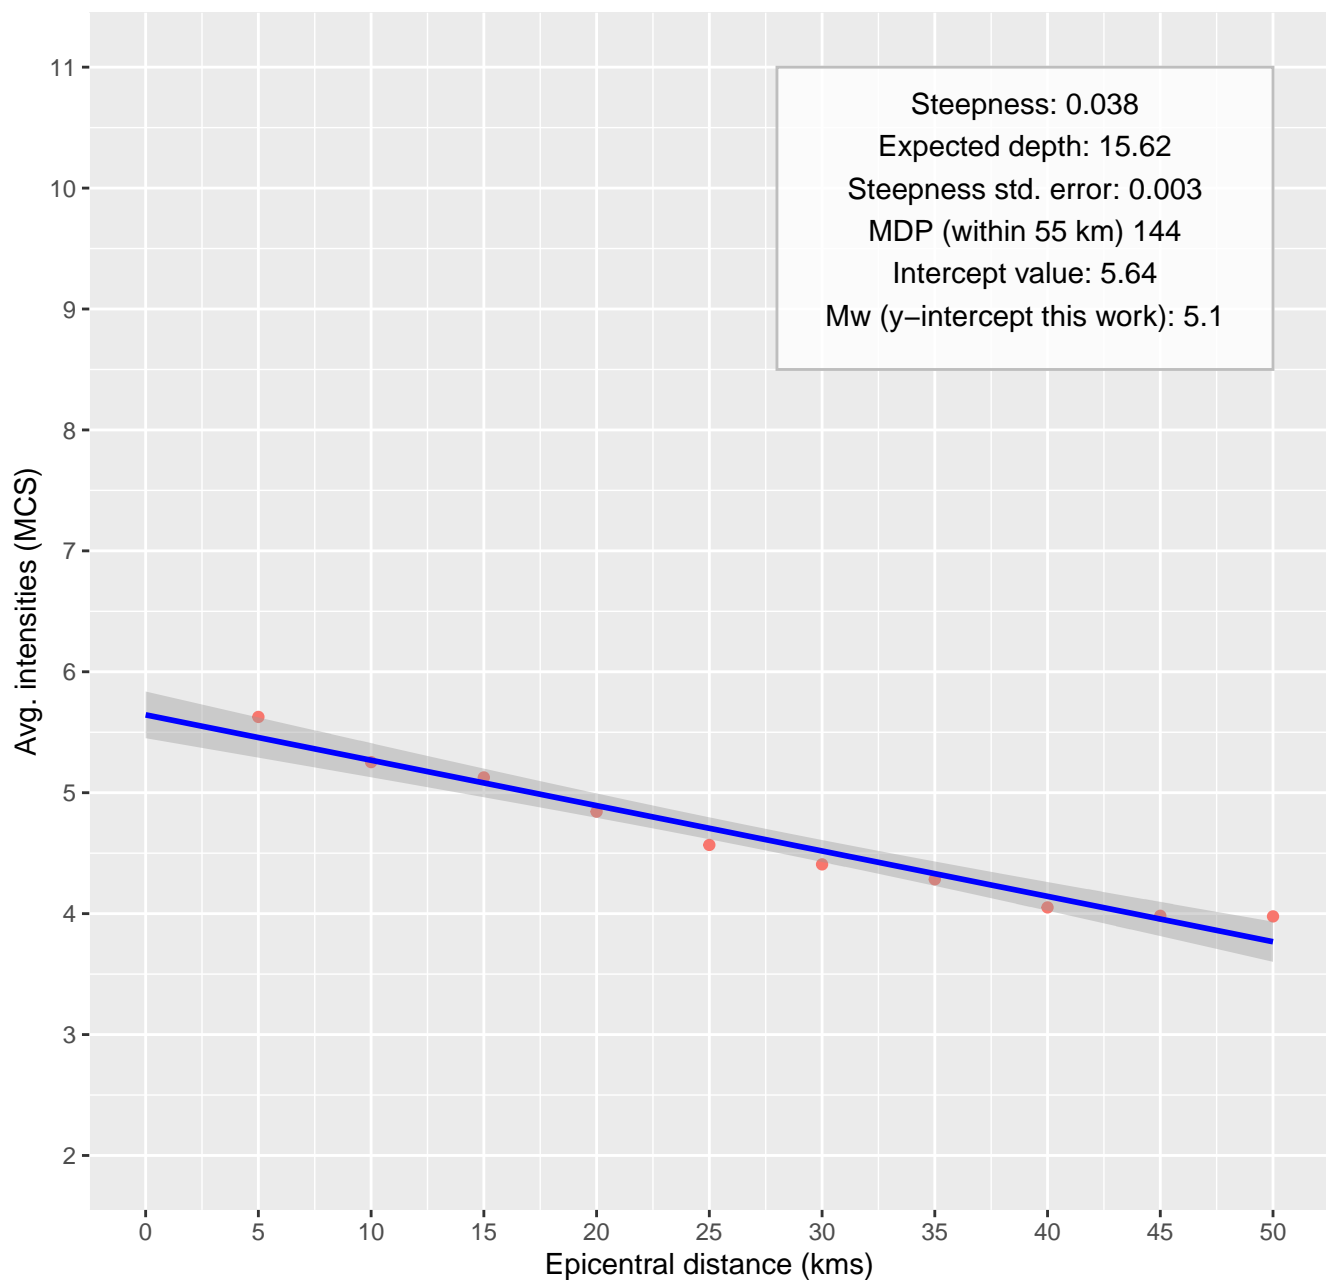

Supplement: Supplementary file 137 [file nhess-23-1007-2023-supplement.zip]

# DBMI\_ 18730712\_0606\_000 | 1873-07-12 – Val Comino

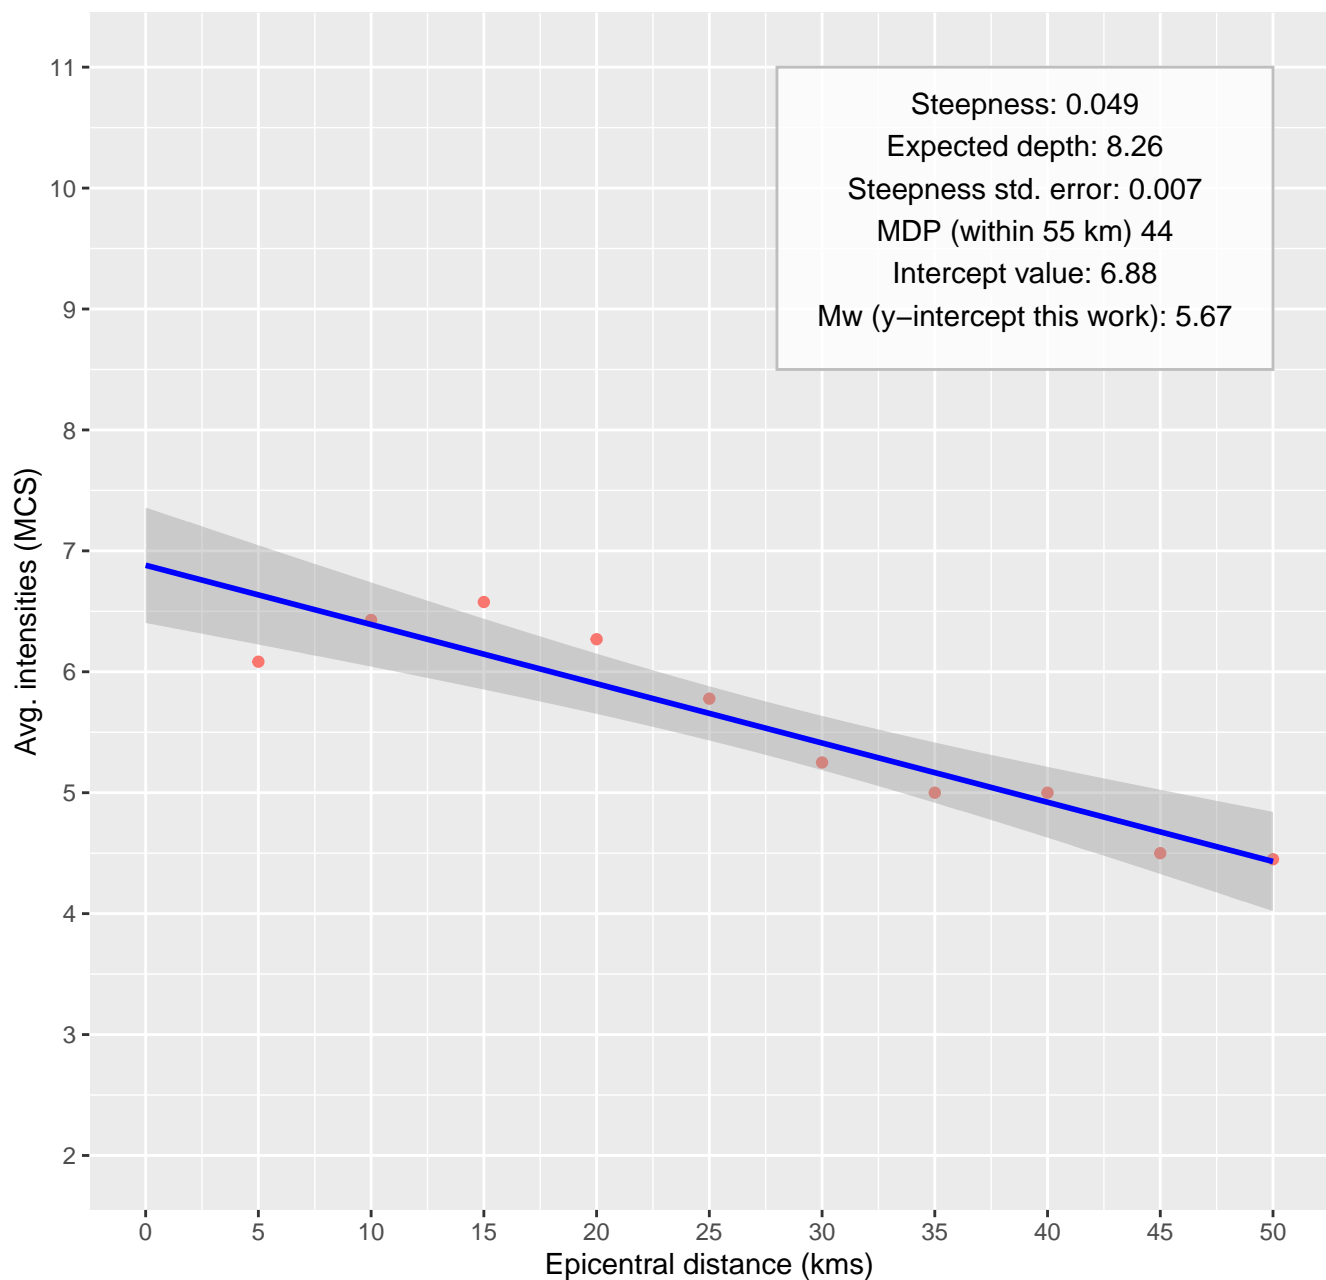

Supplement: Supplementary file 138 [file nhess-23-1007-2023-supplement.zip]

# DBMI\_ 19701231\_2204\_000 | 1970-12-31 – Liguria occidentale

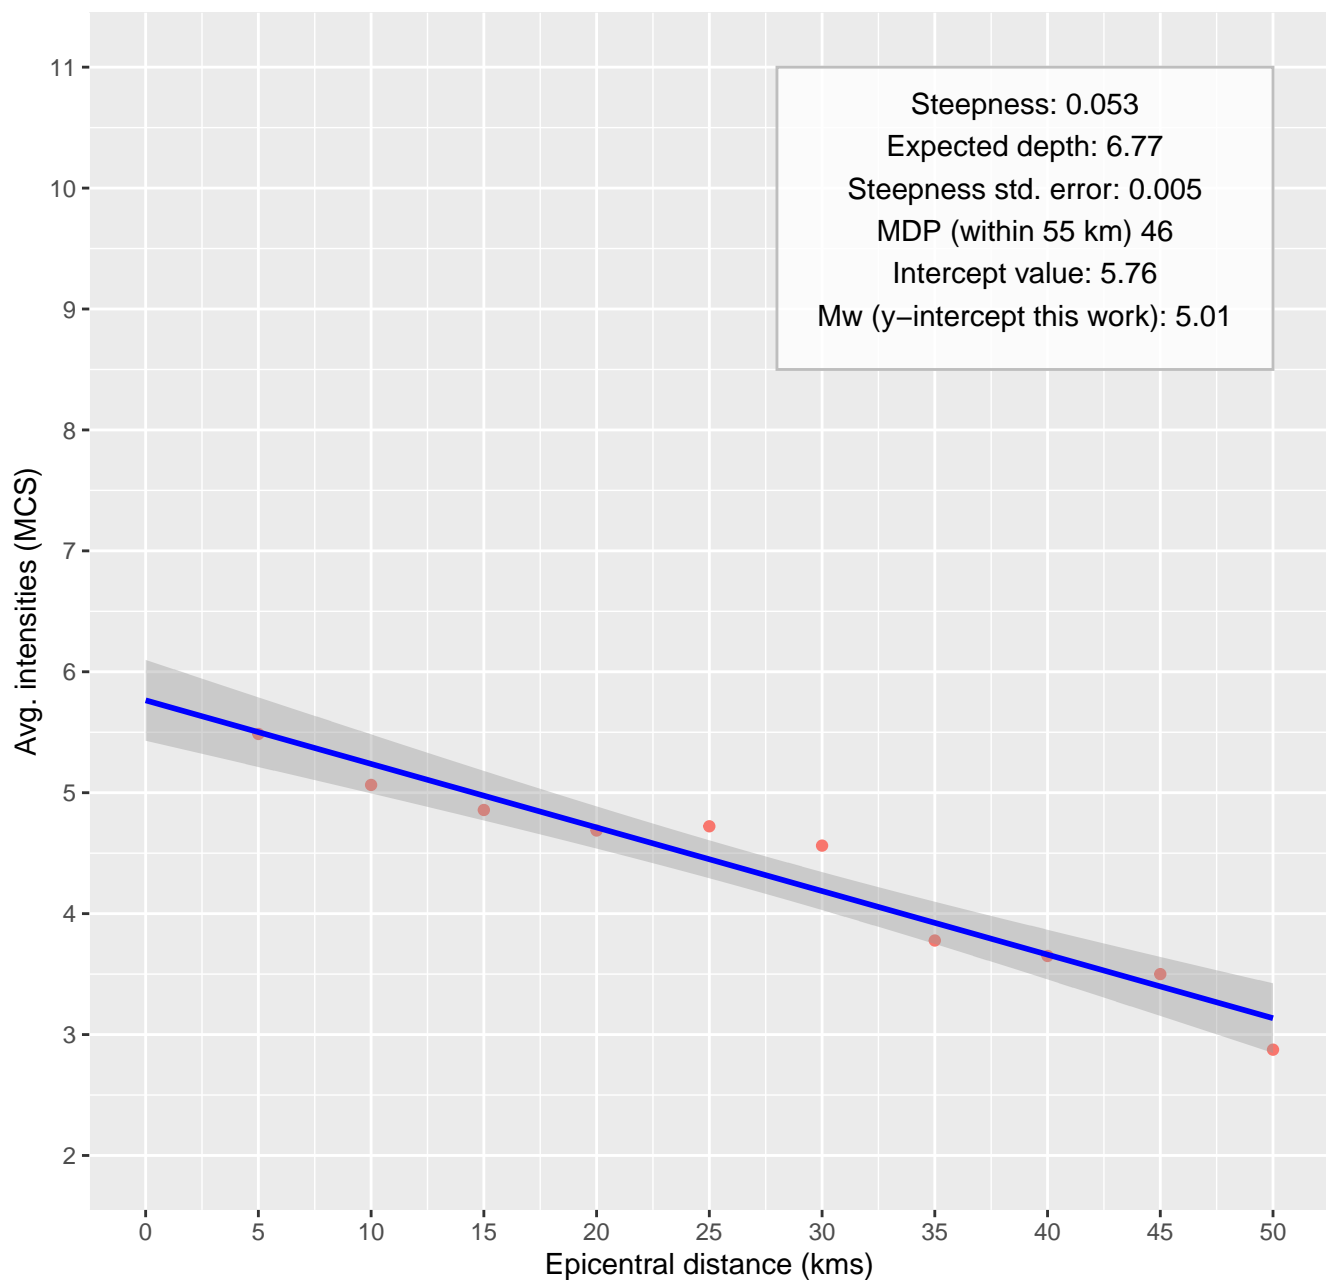

Supplement: Supplementary file 139 [file nhess-23-1007-2023-supplement.zip]

# DBMI\_ 19071023\_2028\_000 | 1907-10-23 – Aspromonte

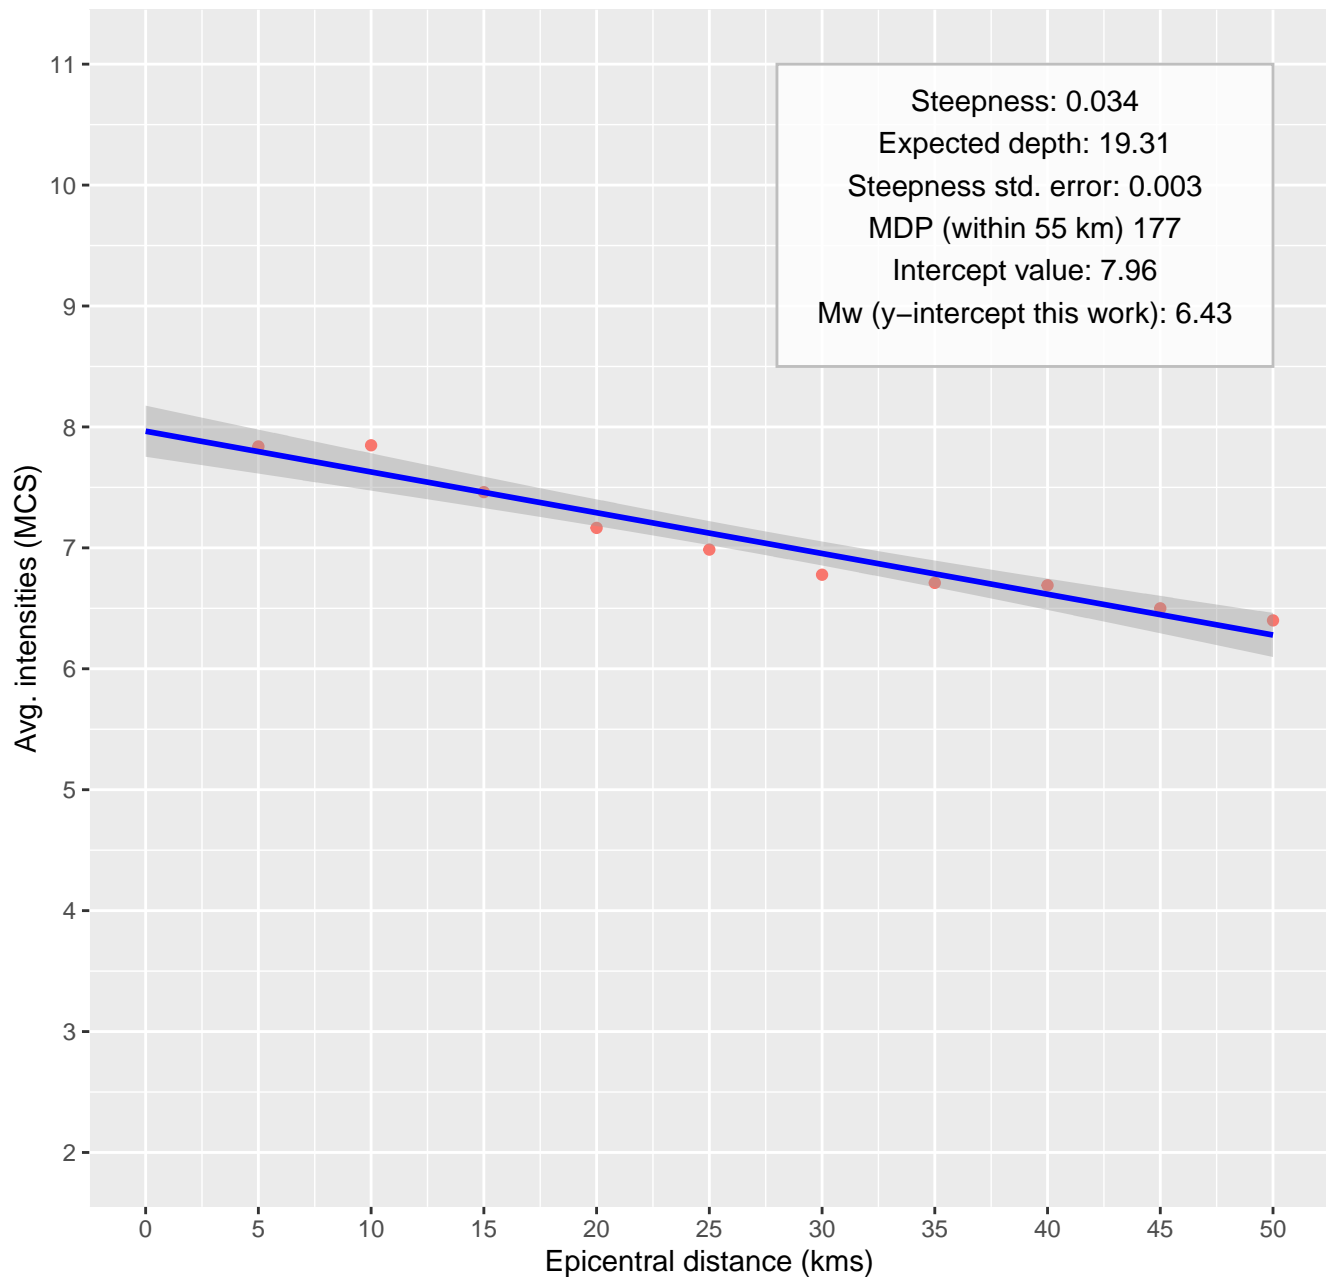

Supplement: Supplementary file 140 [file nhess-23-1007-2023-supplement.zip]

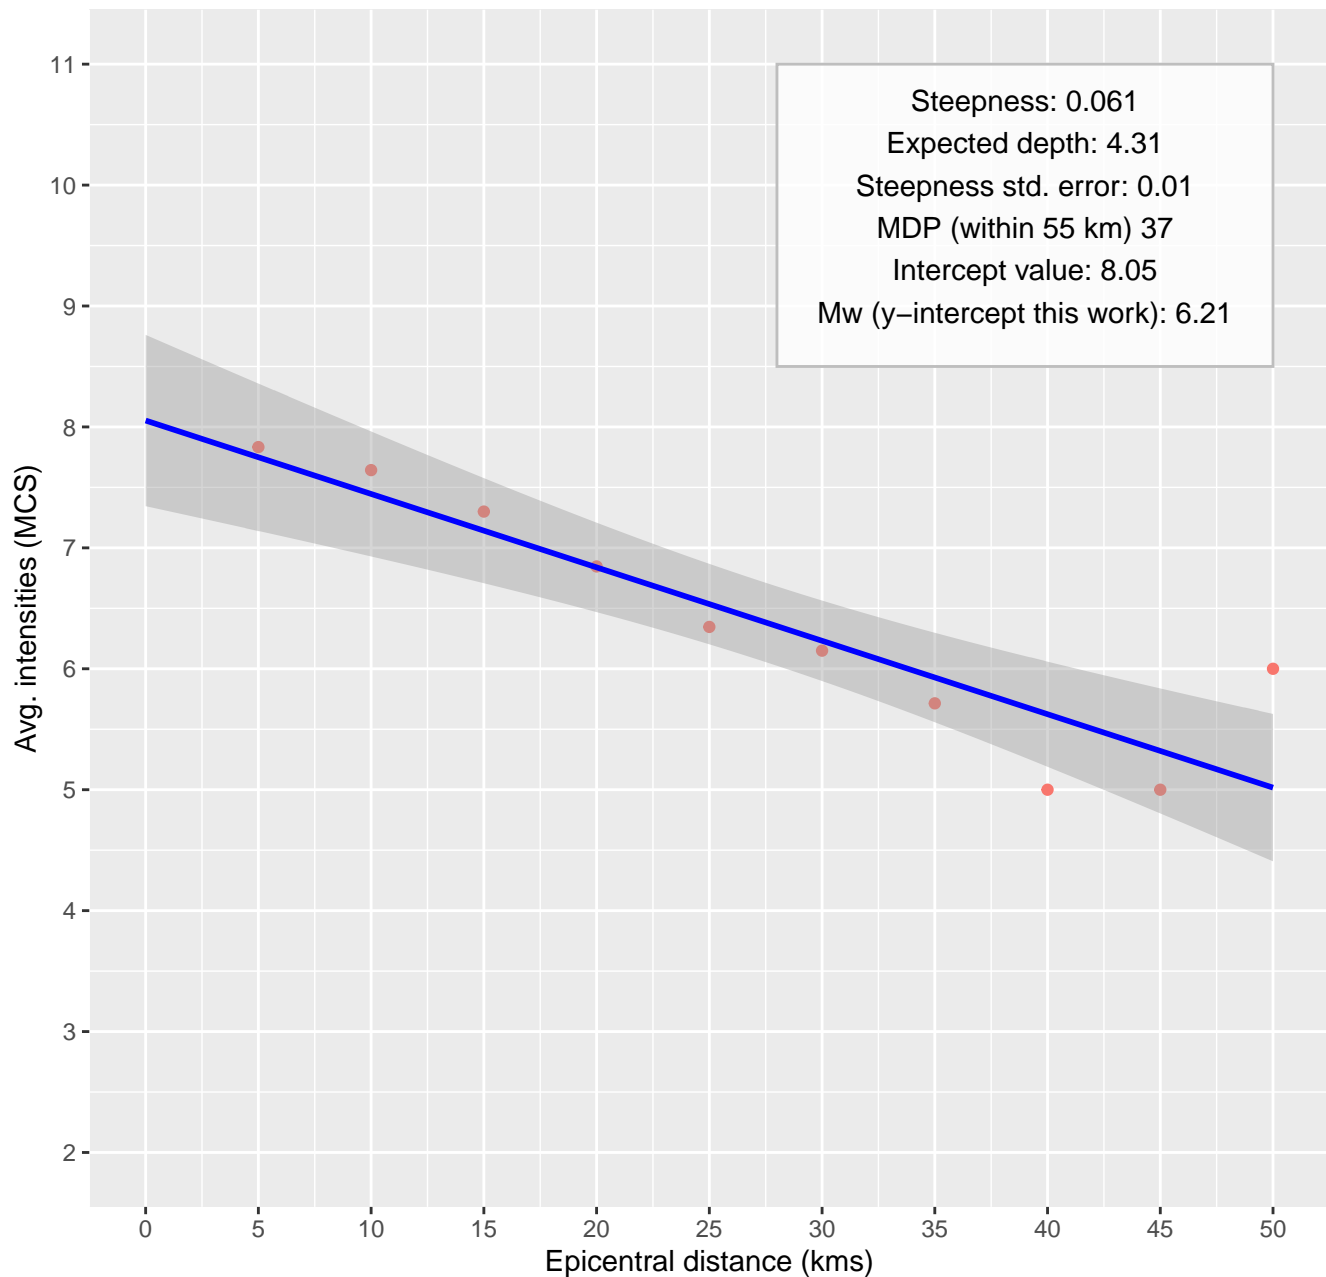

Supplement: Supplementary file 141 [file nhess-23-1007-2023-supplement.zip]

# DBMI\_ 19080710\_0213\_000 | 1908-07-10 – Carnia

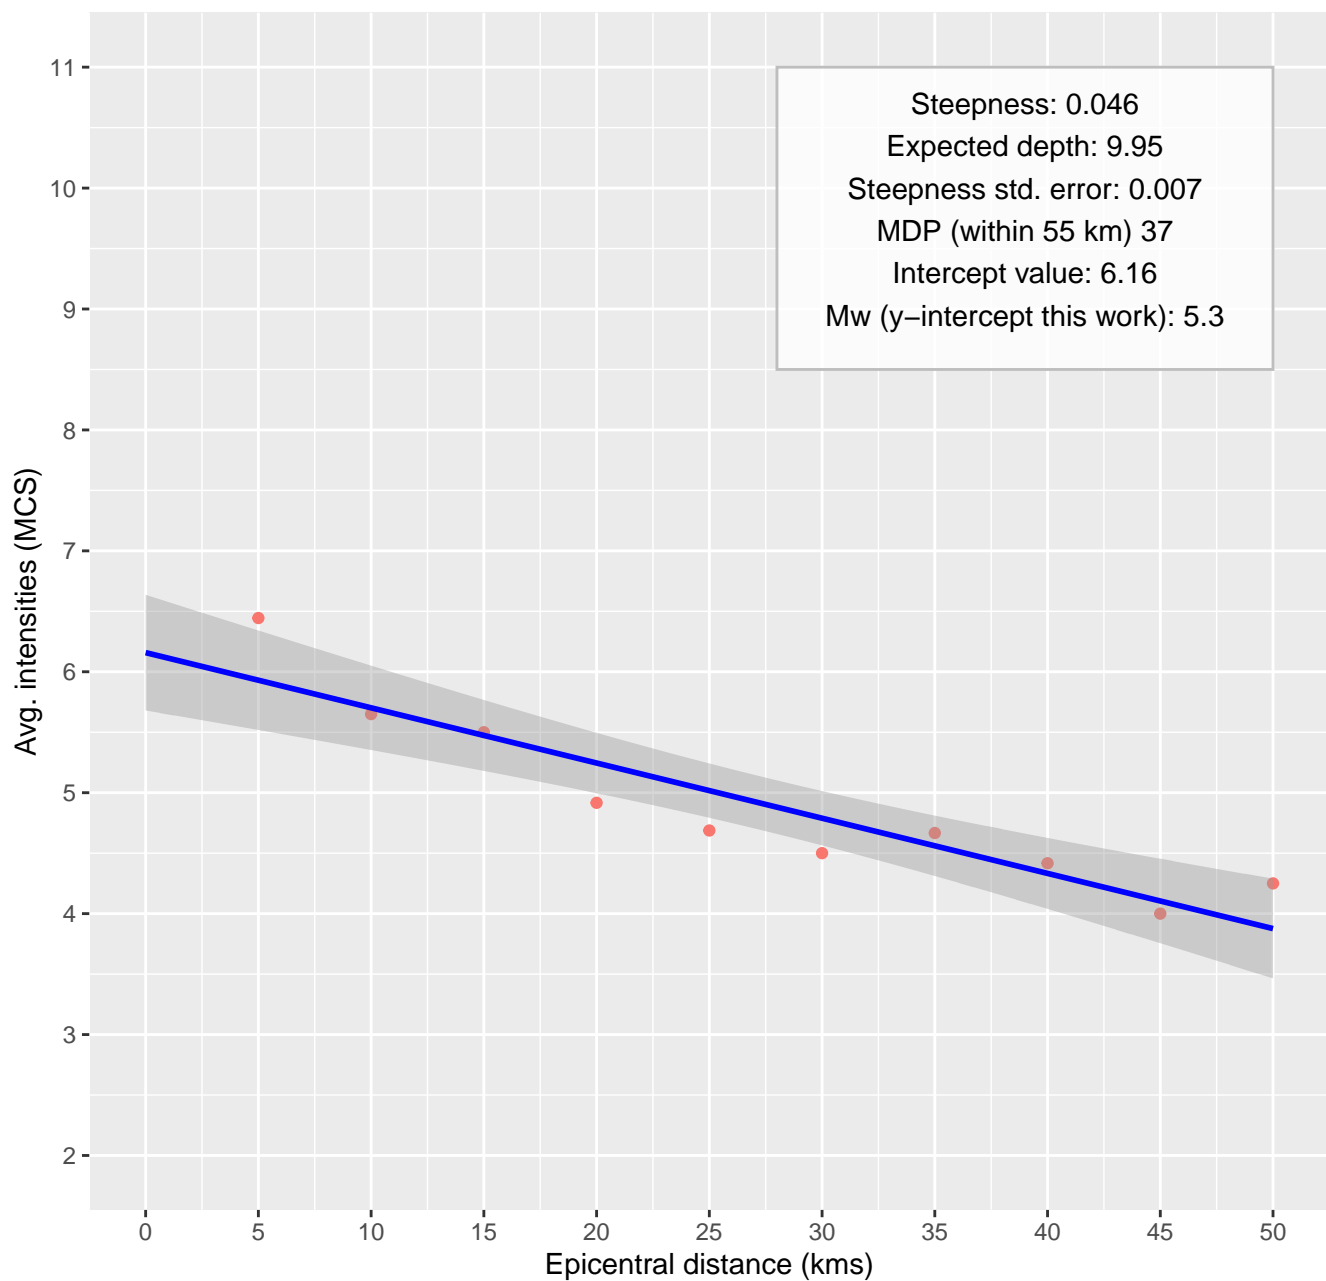

Supplement: Supplementary file 142 [file nhess-23-1007-2023-supplement.zip]

# DBMI\_ 19271028\_2149\_000 | 1927-10-28 – Alta Val di Taro

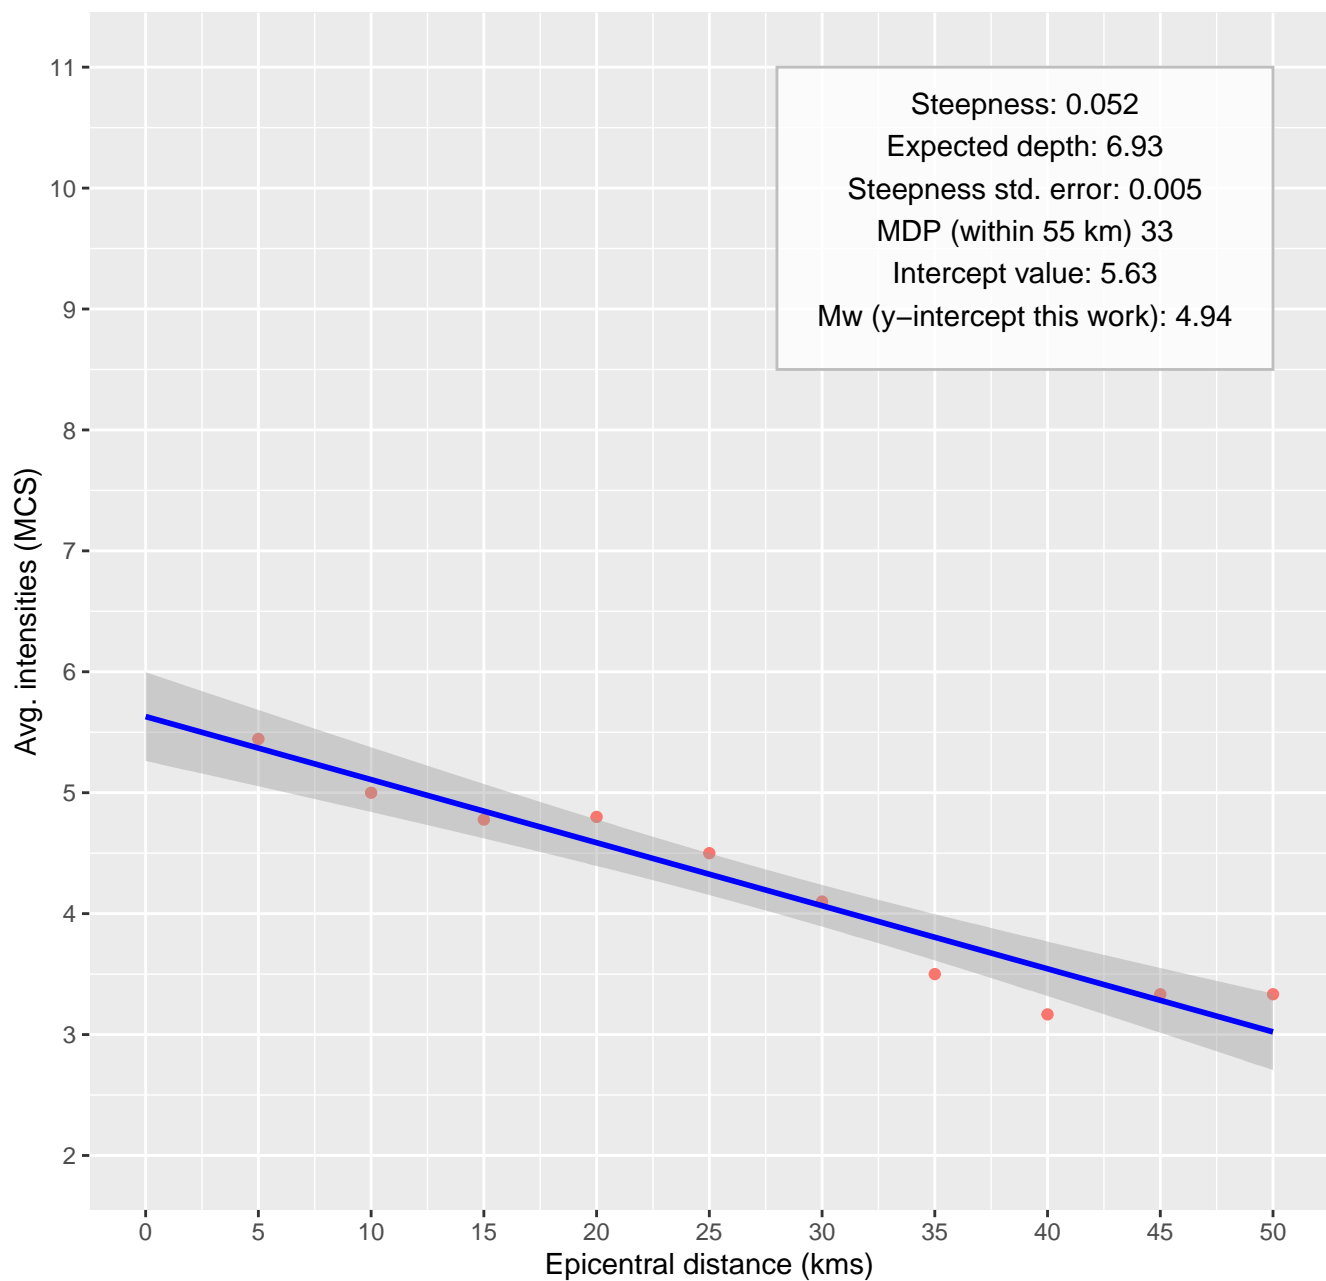

Supplement: Supplementary file 143 [file nhess-23-1007-2023-supplement.zip]

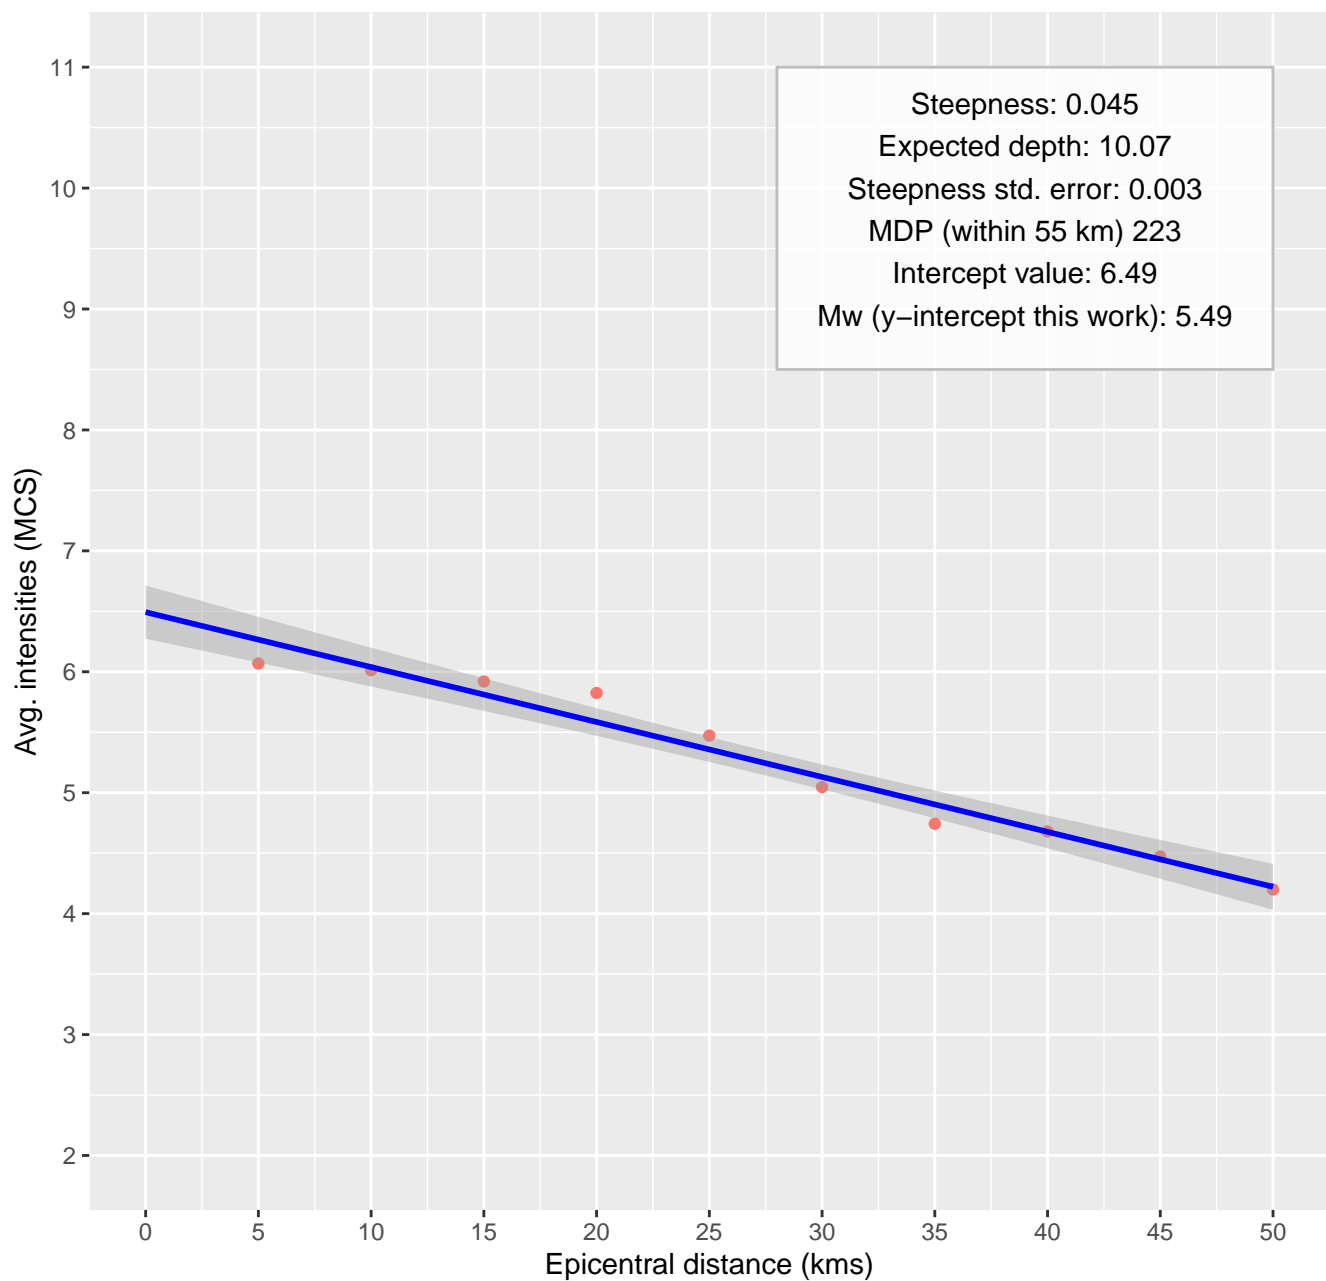

Supplement: Supplementary file 144 [file nhess-23-1007-2023-supplement.zip]

# DBMI\_ 19780415\_2333\_000 | 1978-04-15 – Golfo di Patti

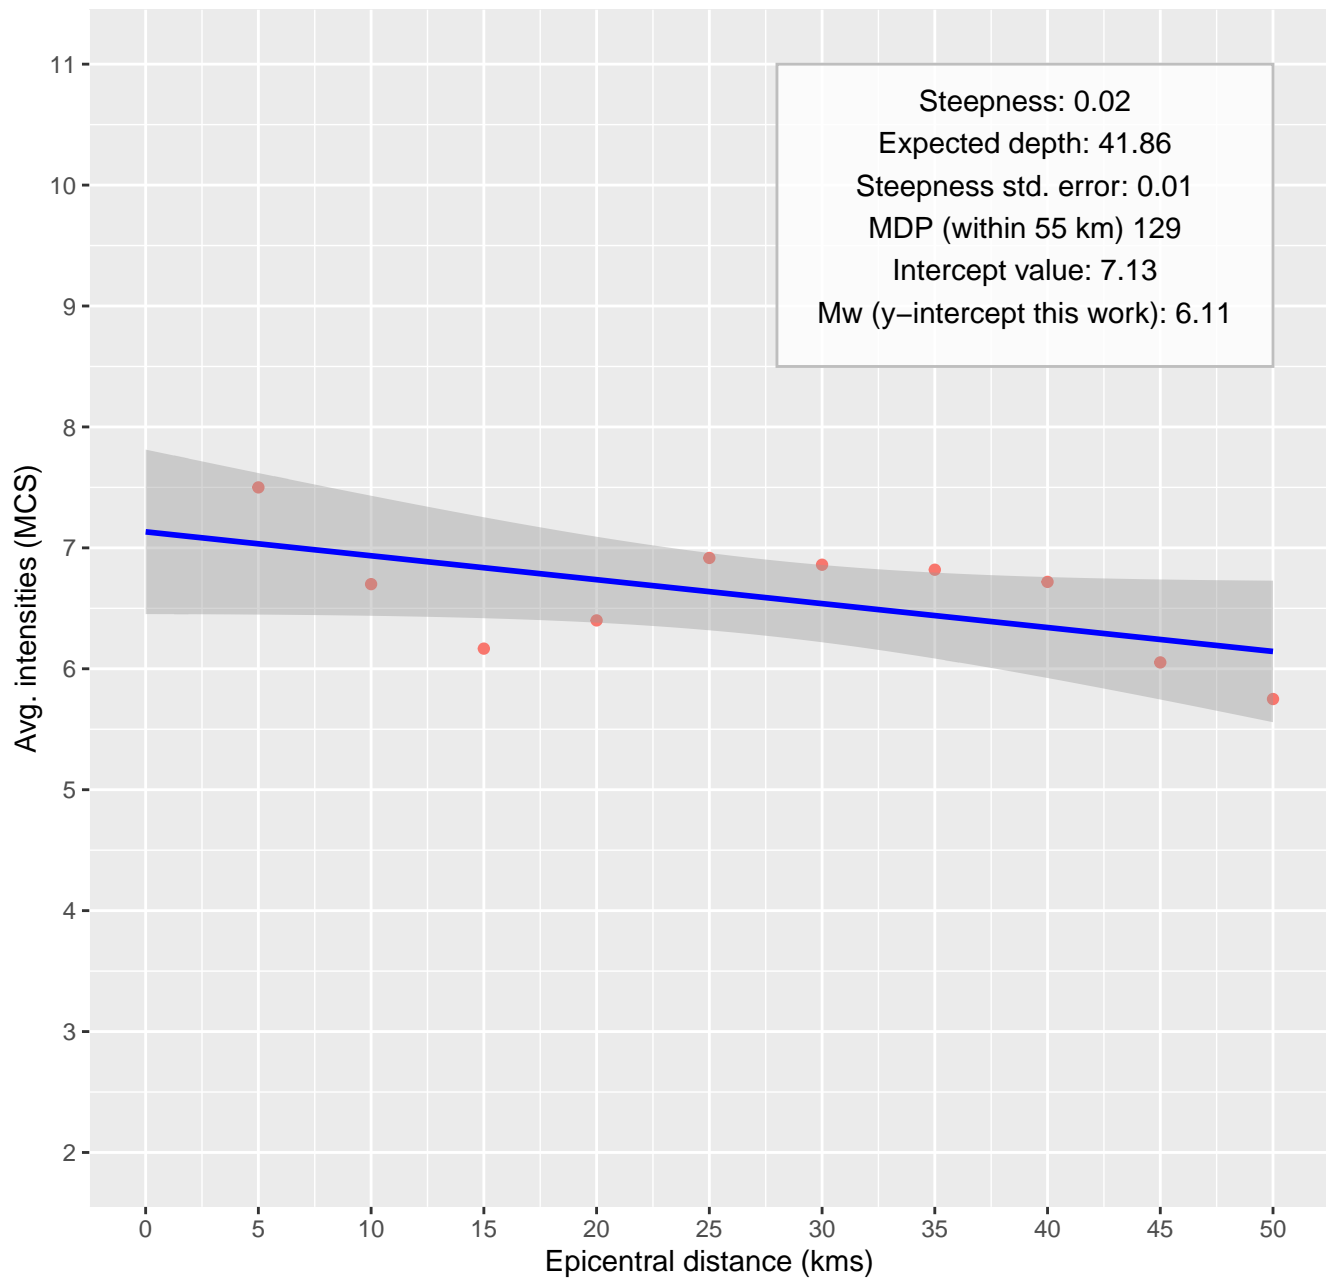

Supplement: Supplementary file 145 [file nhess-23-1007-2023-supplement.zip]

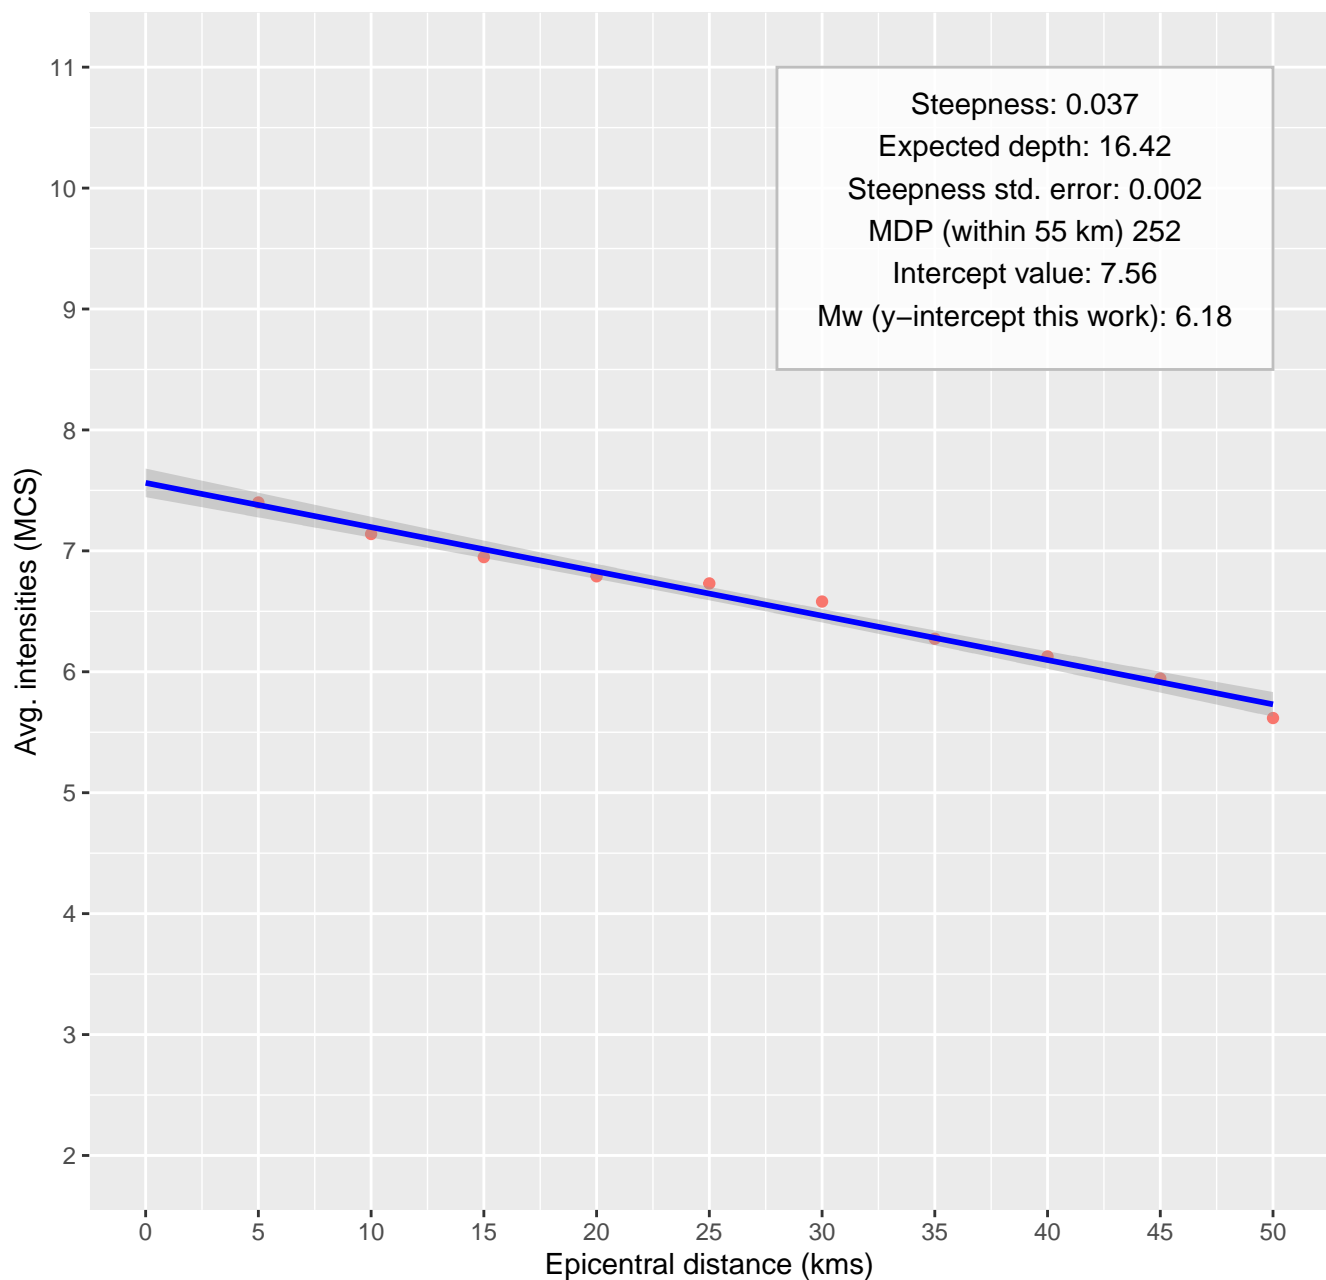

Supplement: Supplementary file 146 [file nhess-23-1007-2023-supplement.zip]

# DBMI\_ 18980304\_2105\_000 | 1898-03-04 – Parmense

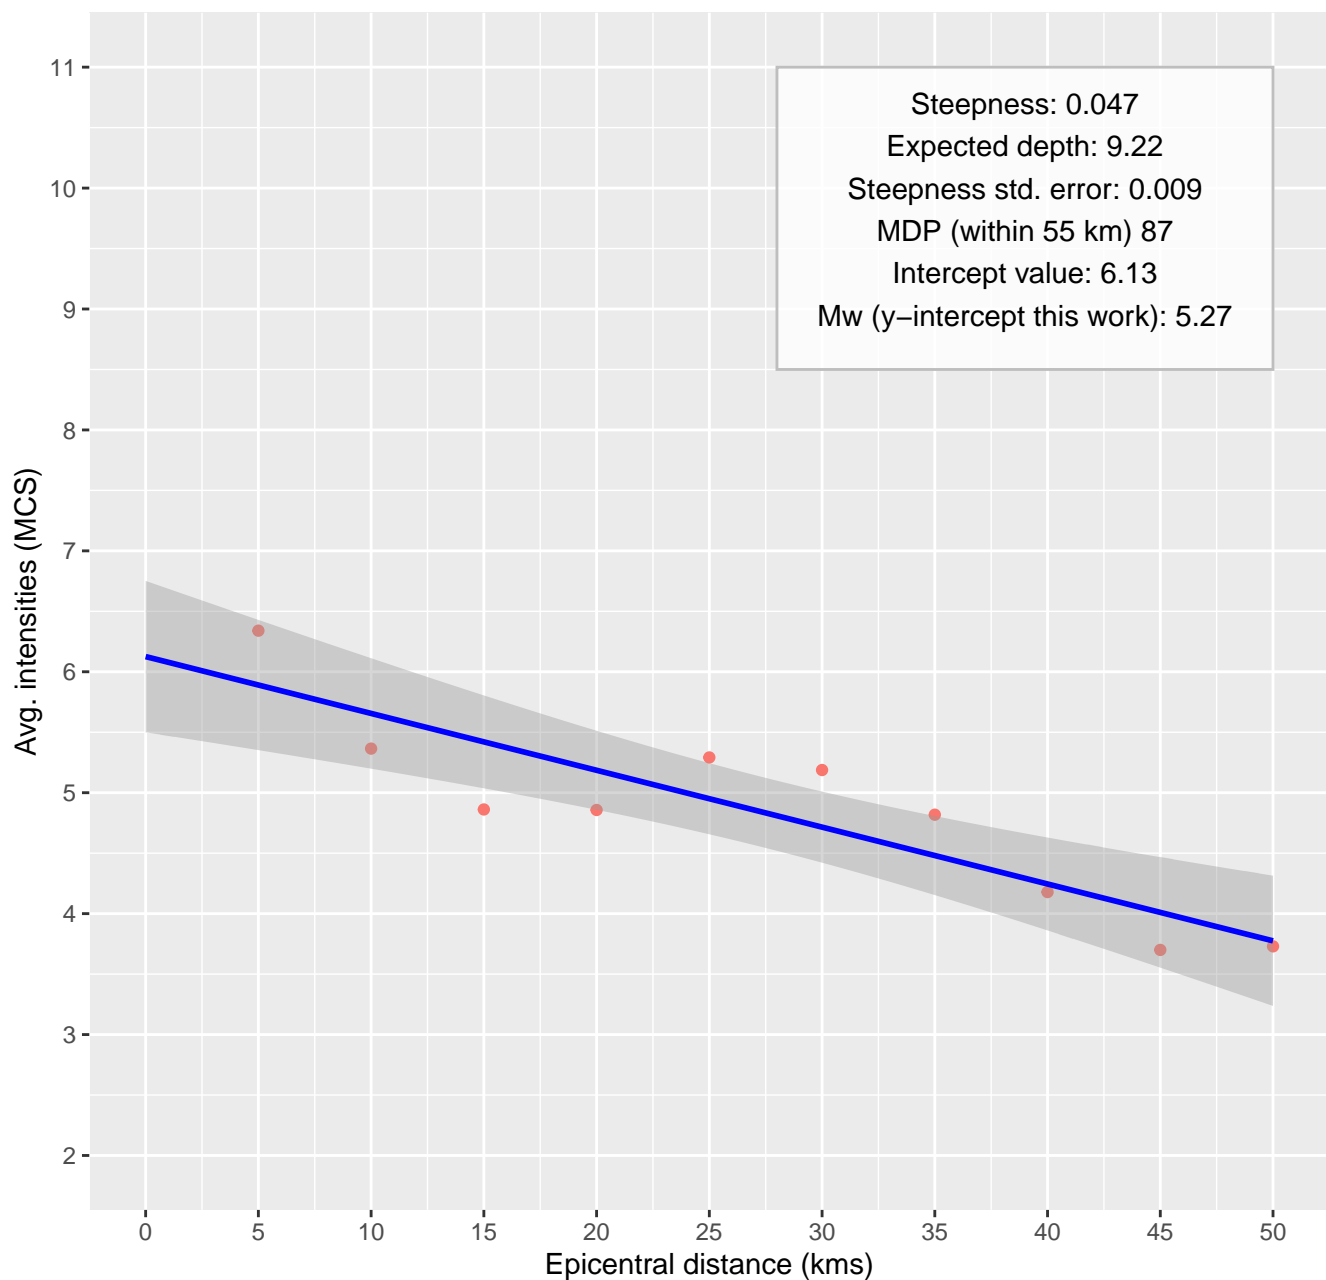

Supplement: Supplementary file 147 [file nhess-23-1007-2023-supplement.zip]

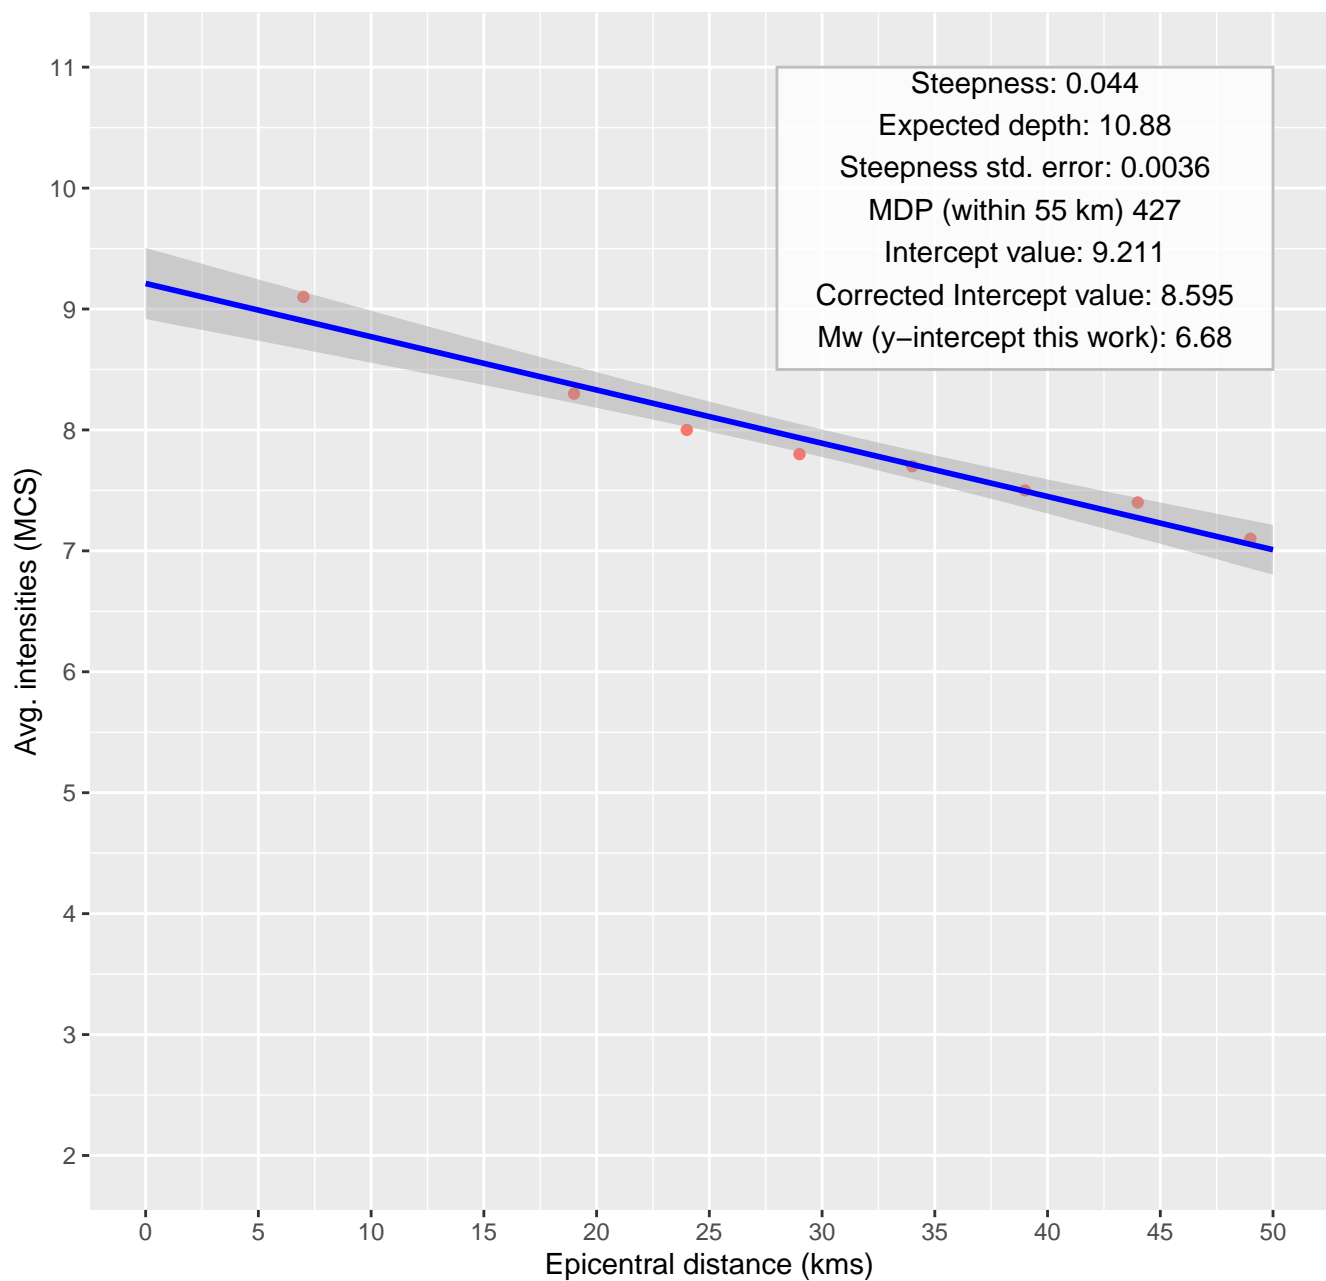

Supplement: Supplementary file 148 [file nhess-23-1007-2023-supplement.zip]

# DBMI\_ 19670403\_1636\_000 | 1967-04-03 – Reggio

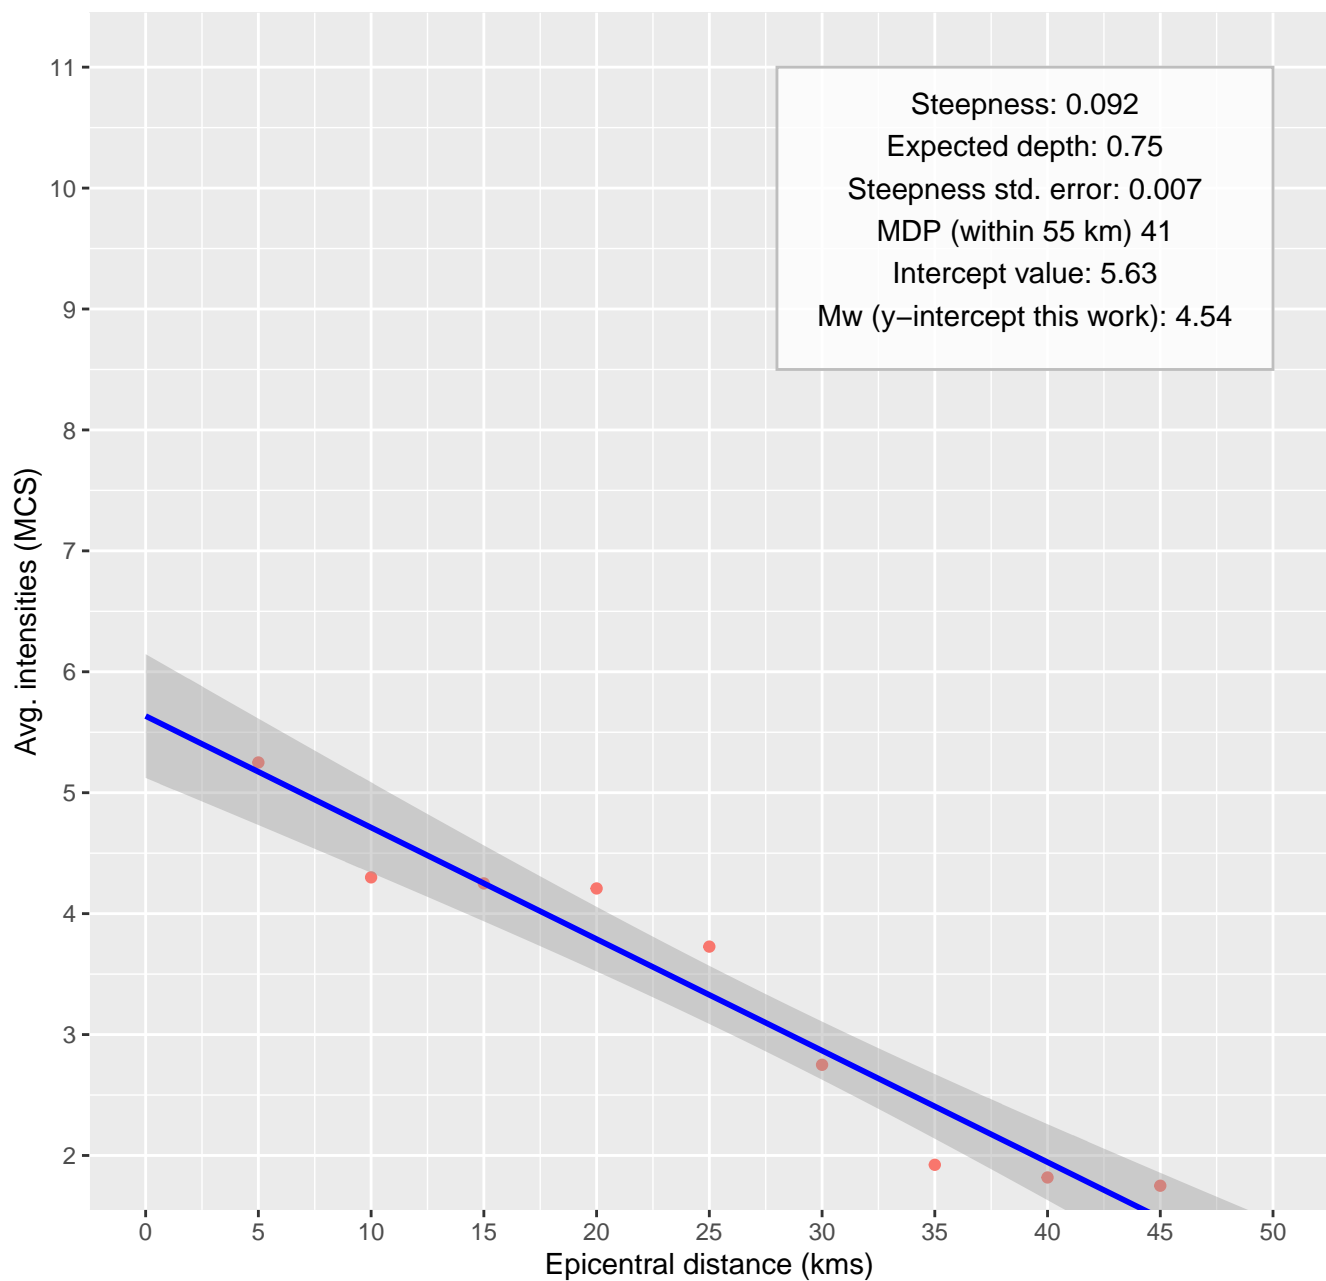

Supplement: Supplementary file 149 [file nhess-23-1007-2023-supplement.zip]

# DBMI\_ 19470217\_0012\_000 | 1947-02-17 – Alpi Cozie

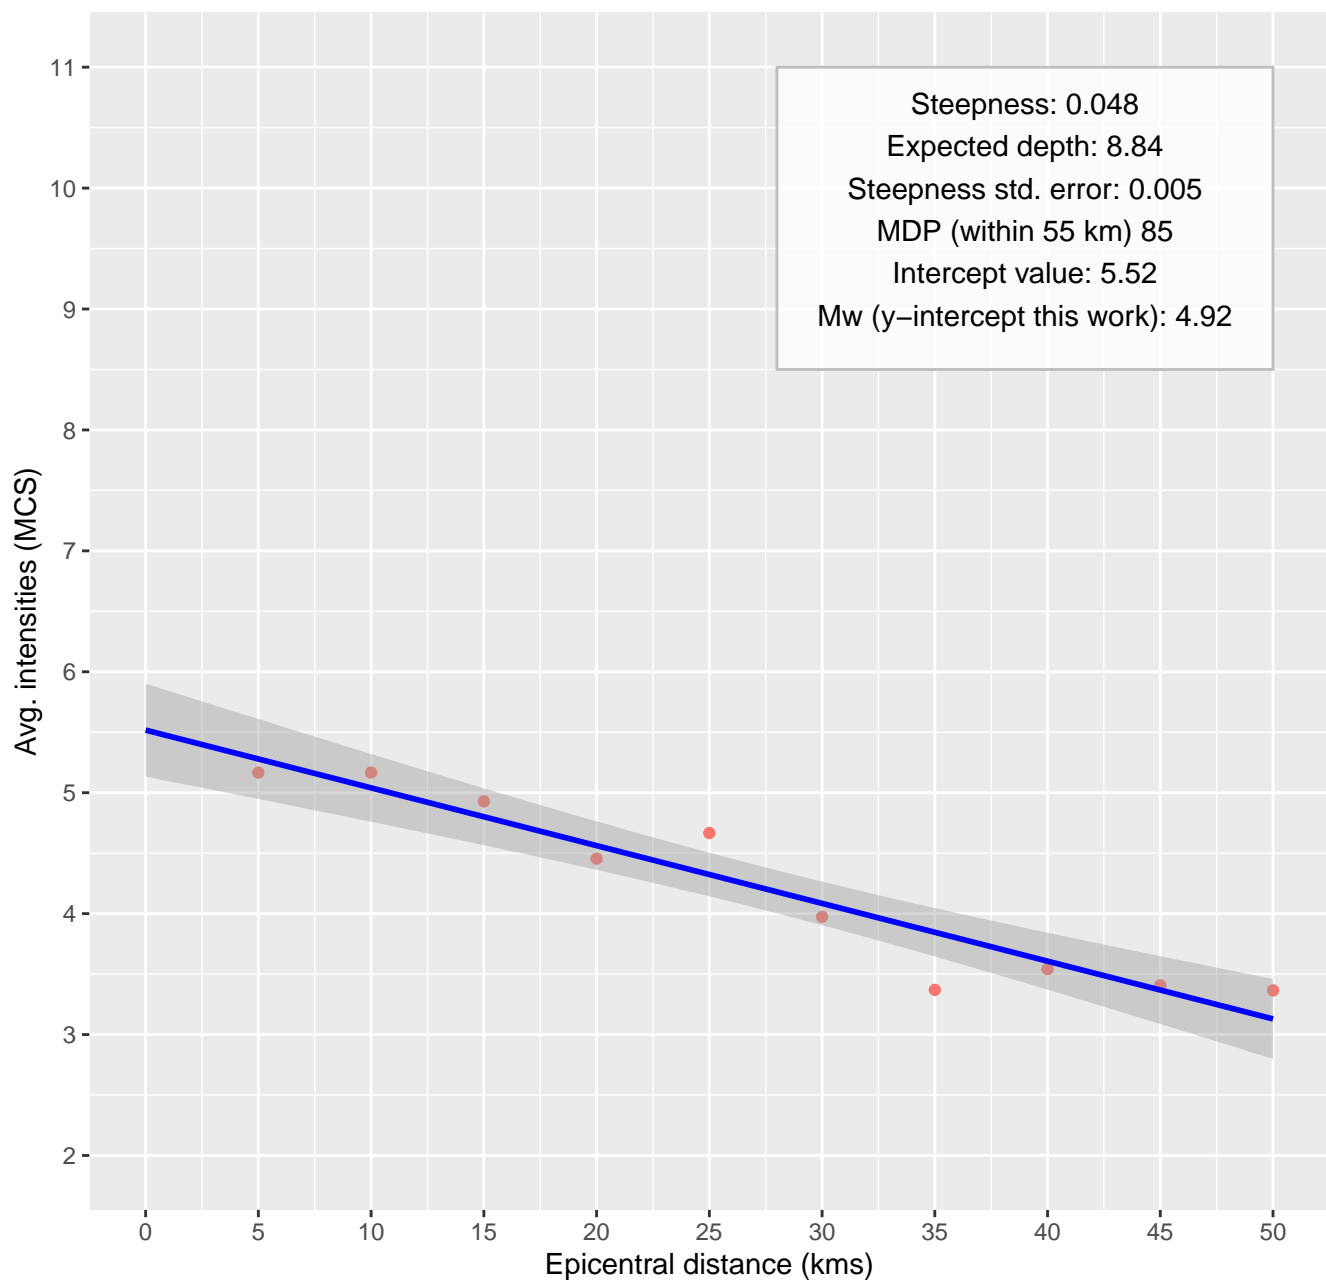

Supplement: Supplementary file 150 [file nhess-23-1007-2023-supplement.zip]

# DBMI\_ 18920105\_0000\_000 | 1892-01-05 – Garda occidentale

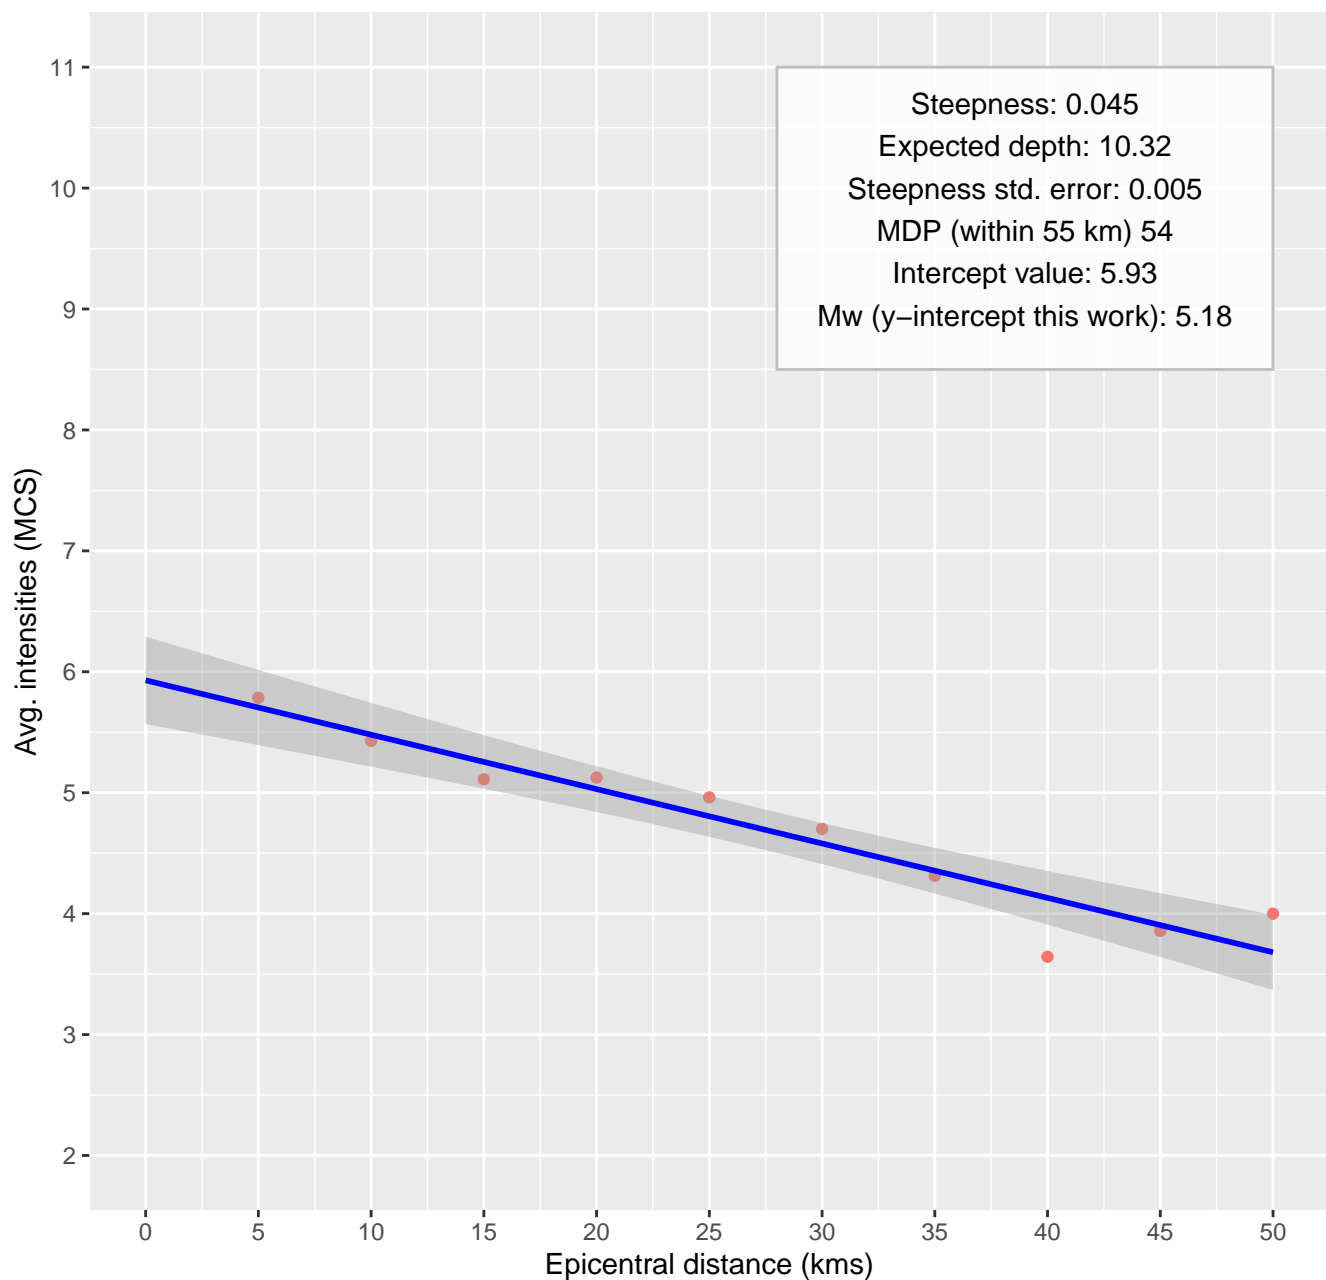

Supplement: Supplementary file 151 [file nhess-23-1007-2023-supplement.zip]

# DBMI\_ 19150326\_2337\_000 | 1915-03-26 – Perugia

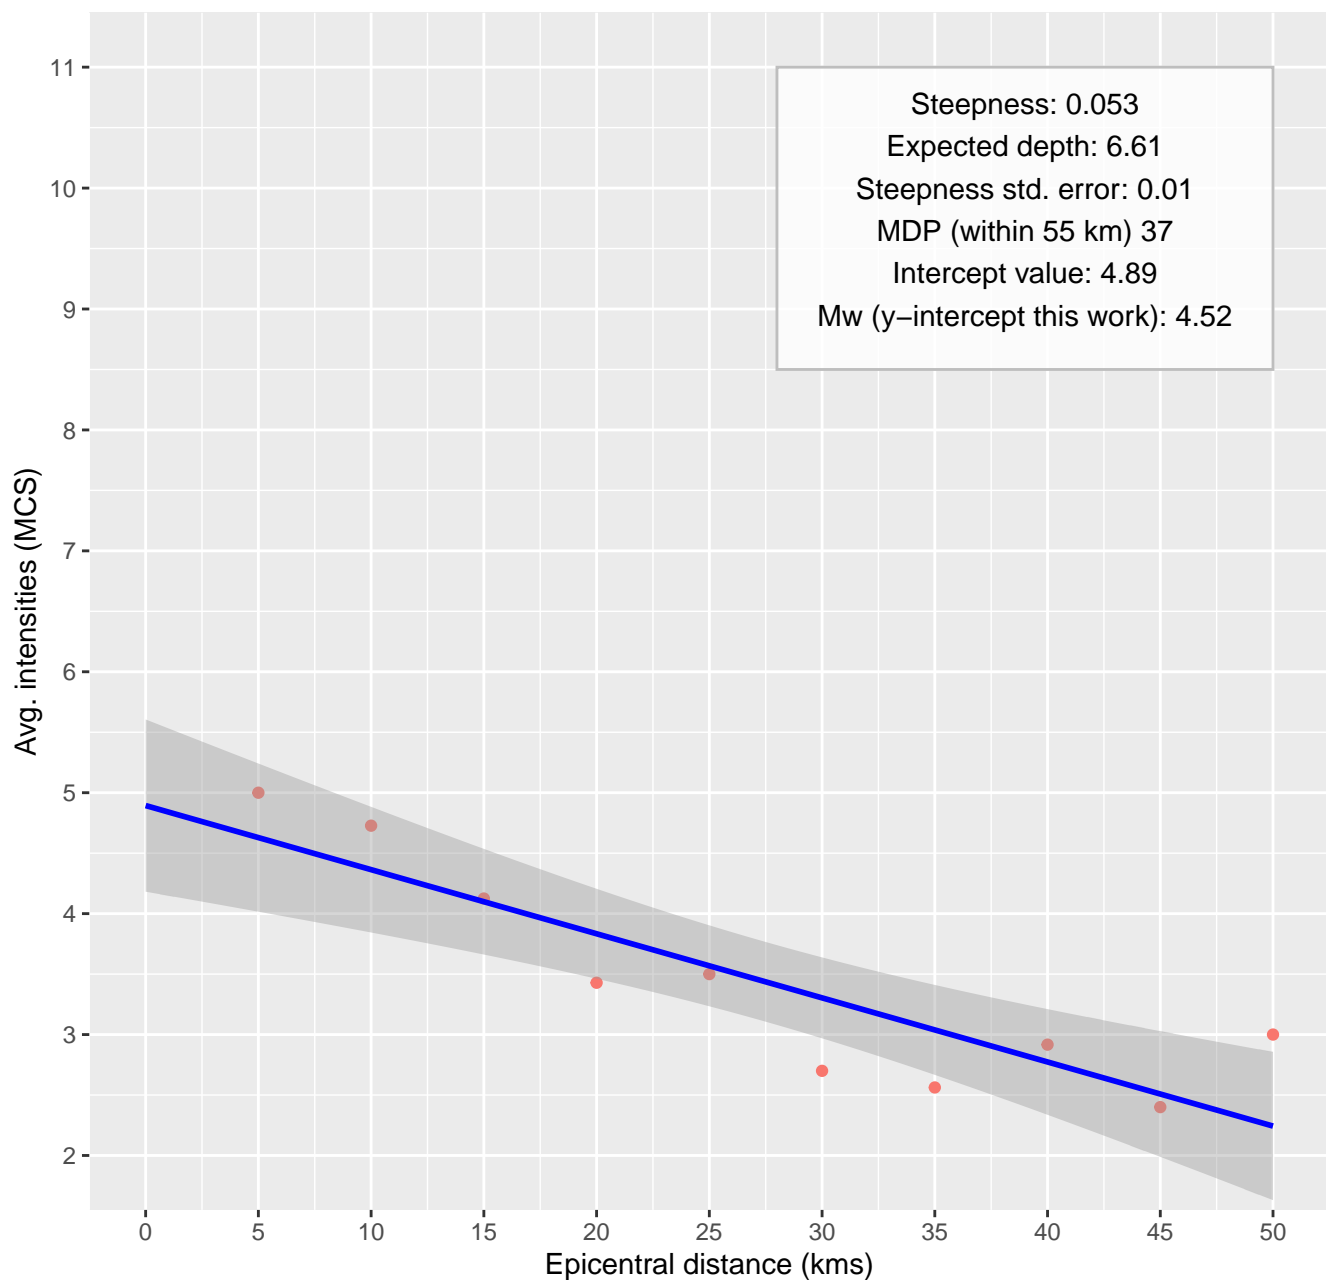

Supplement: Supplementary file 152 [file nhess-23-1007-2023-supplement.zip]

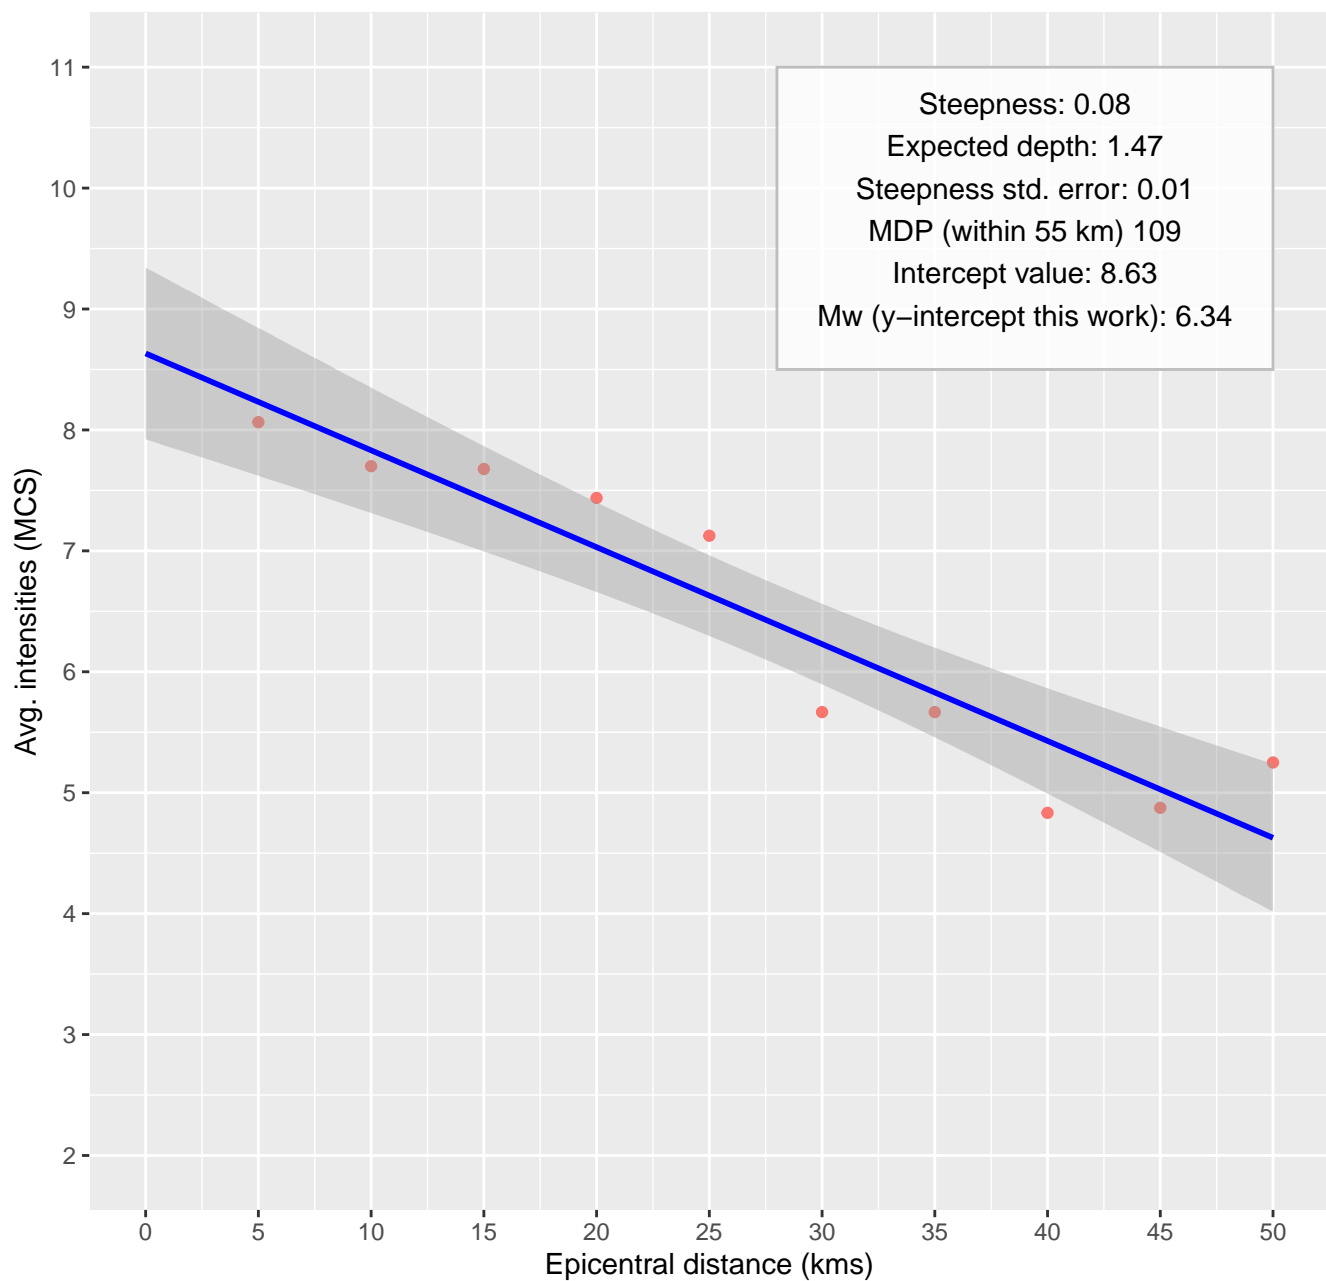

Supplement: Supplementary file 153 [file nhess-23-1007-2023-supplement.zip]

# DBMI\_ 18990626\_2317\_000 | 1899-06-26 – Valle del Bisenzio

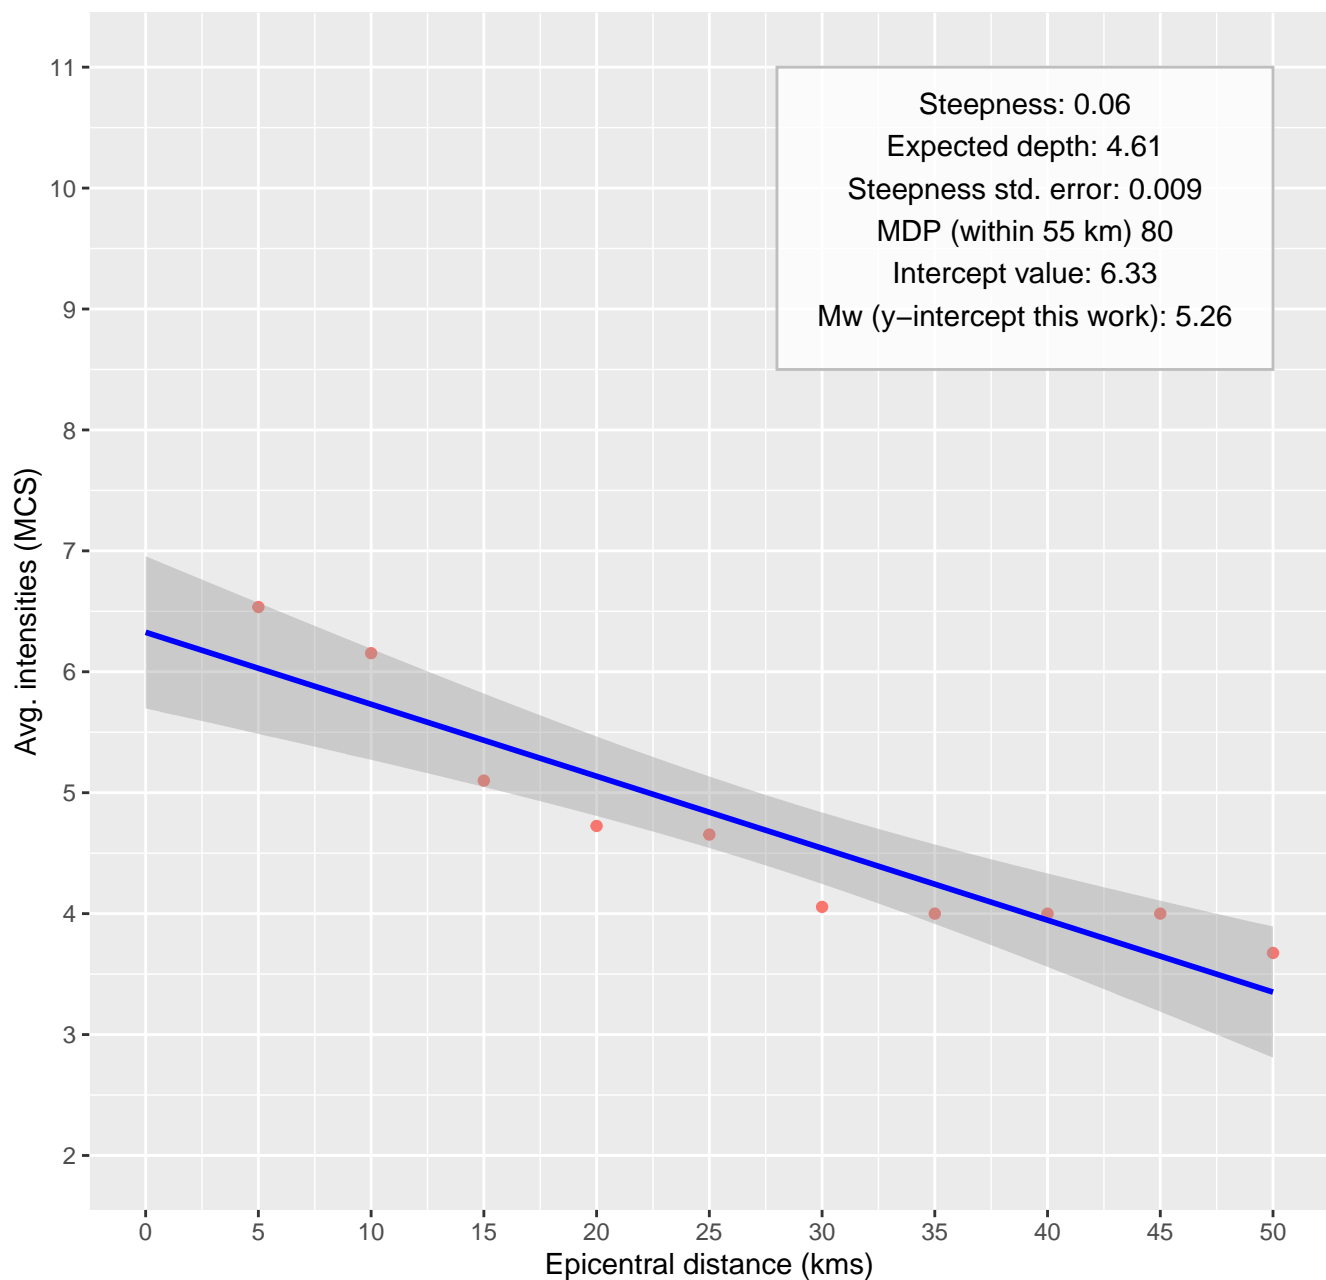

Supplement: Supplementary file 154 [file nhess-23-1007-2023-supplement.zip]

# DBMI\_ 19610508\_2245\_000 | 1961-05-08 – Forlivese

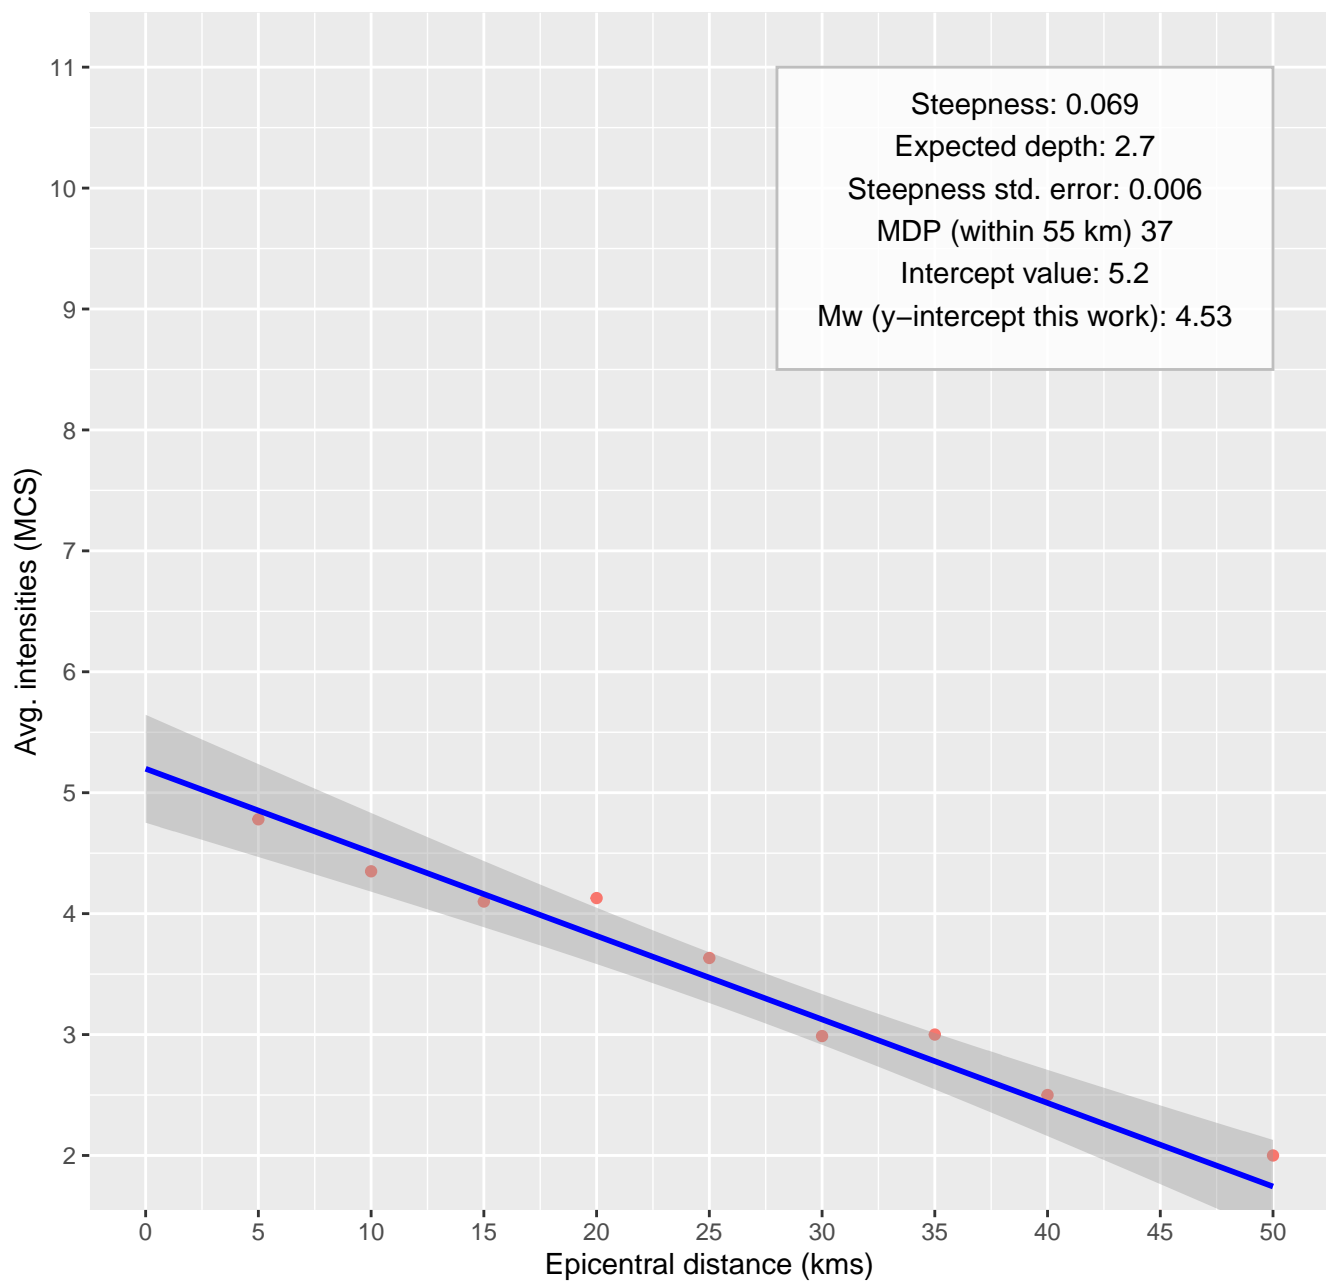

Supplement: Supplementary file 155 [file nhess-23-1007-2023-supplement.zip]

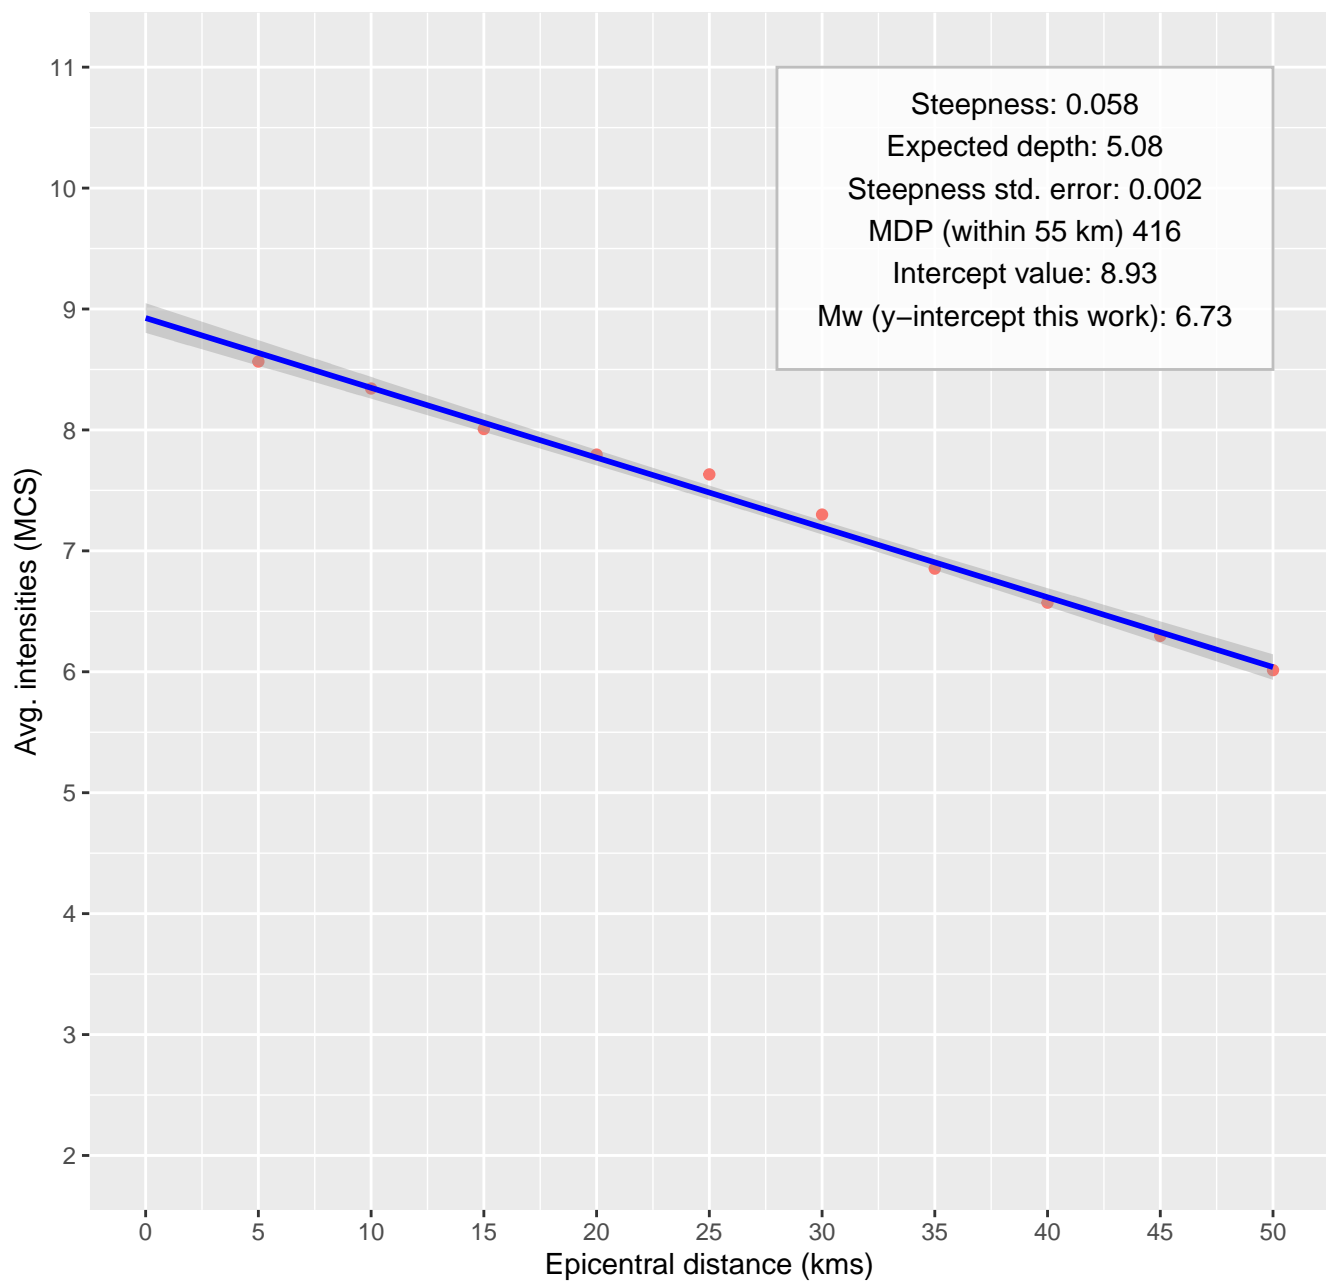

Supplement: Supplementary file 156 [file nhess-23-1007-2023-supplement.zip]

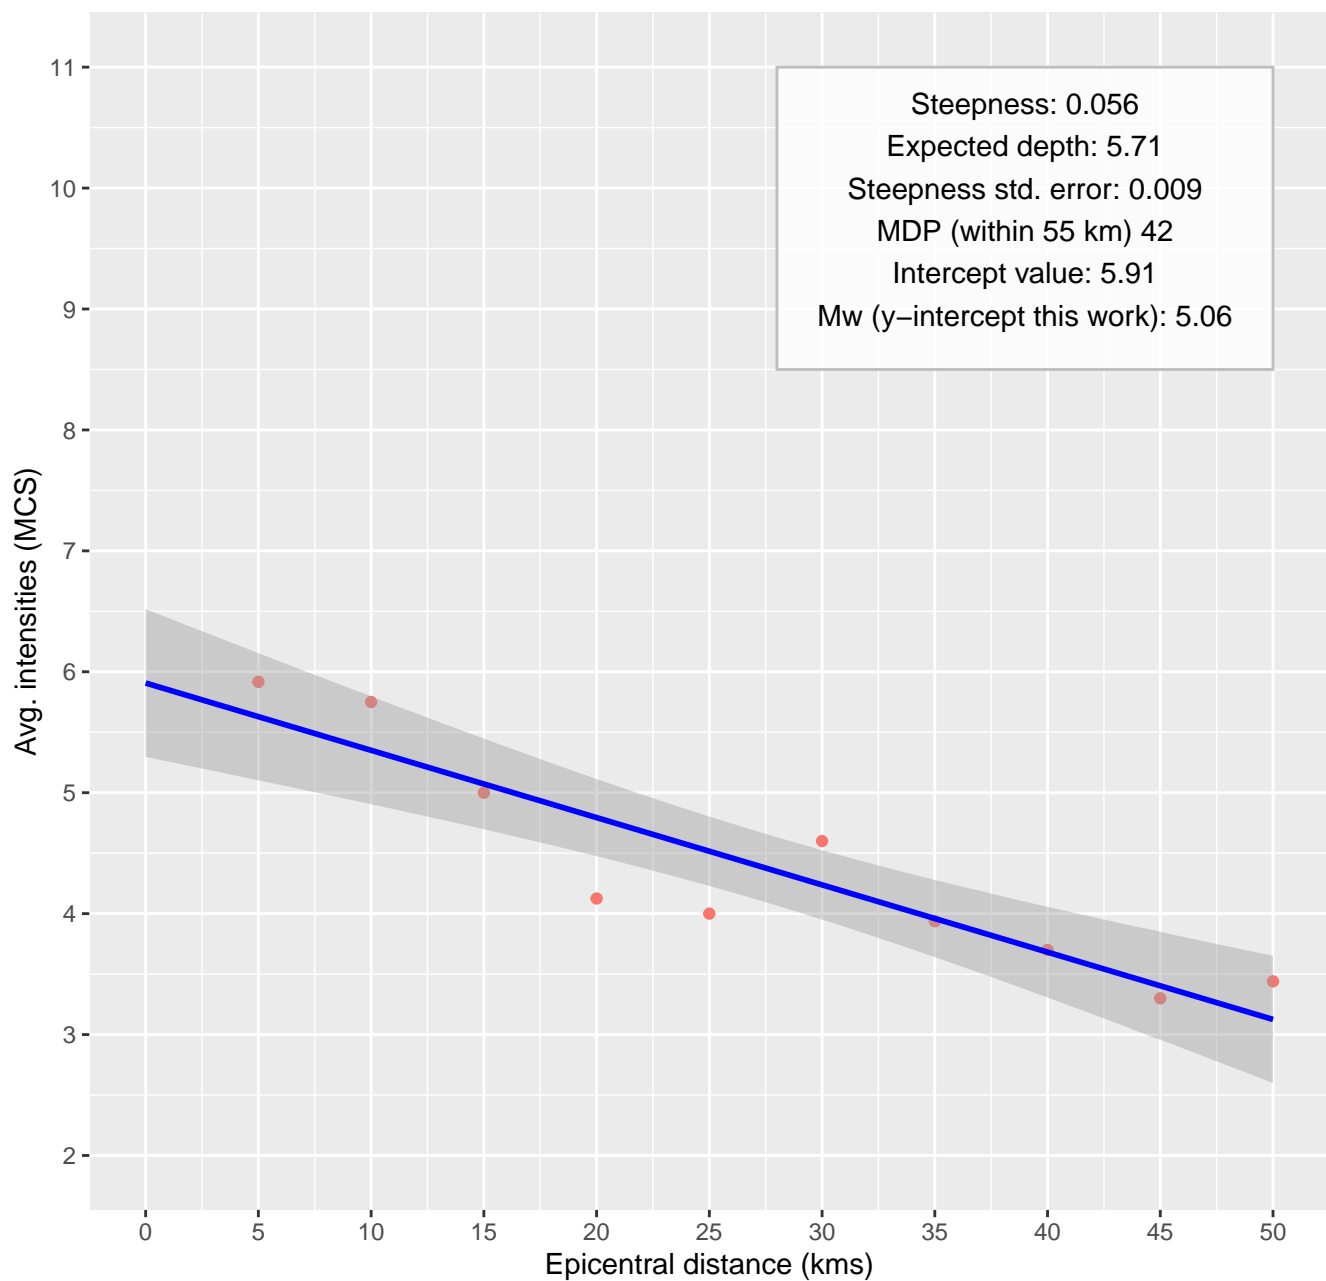

Supplement: Supplementary file 157 [file nhess-23-1007-2023-supplement.zip]

# DBMI\_ 19690809\_0920\_000 | 1969-08-09 – Appennino toscano-romagnolo

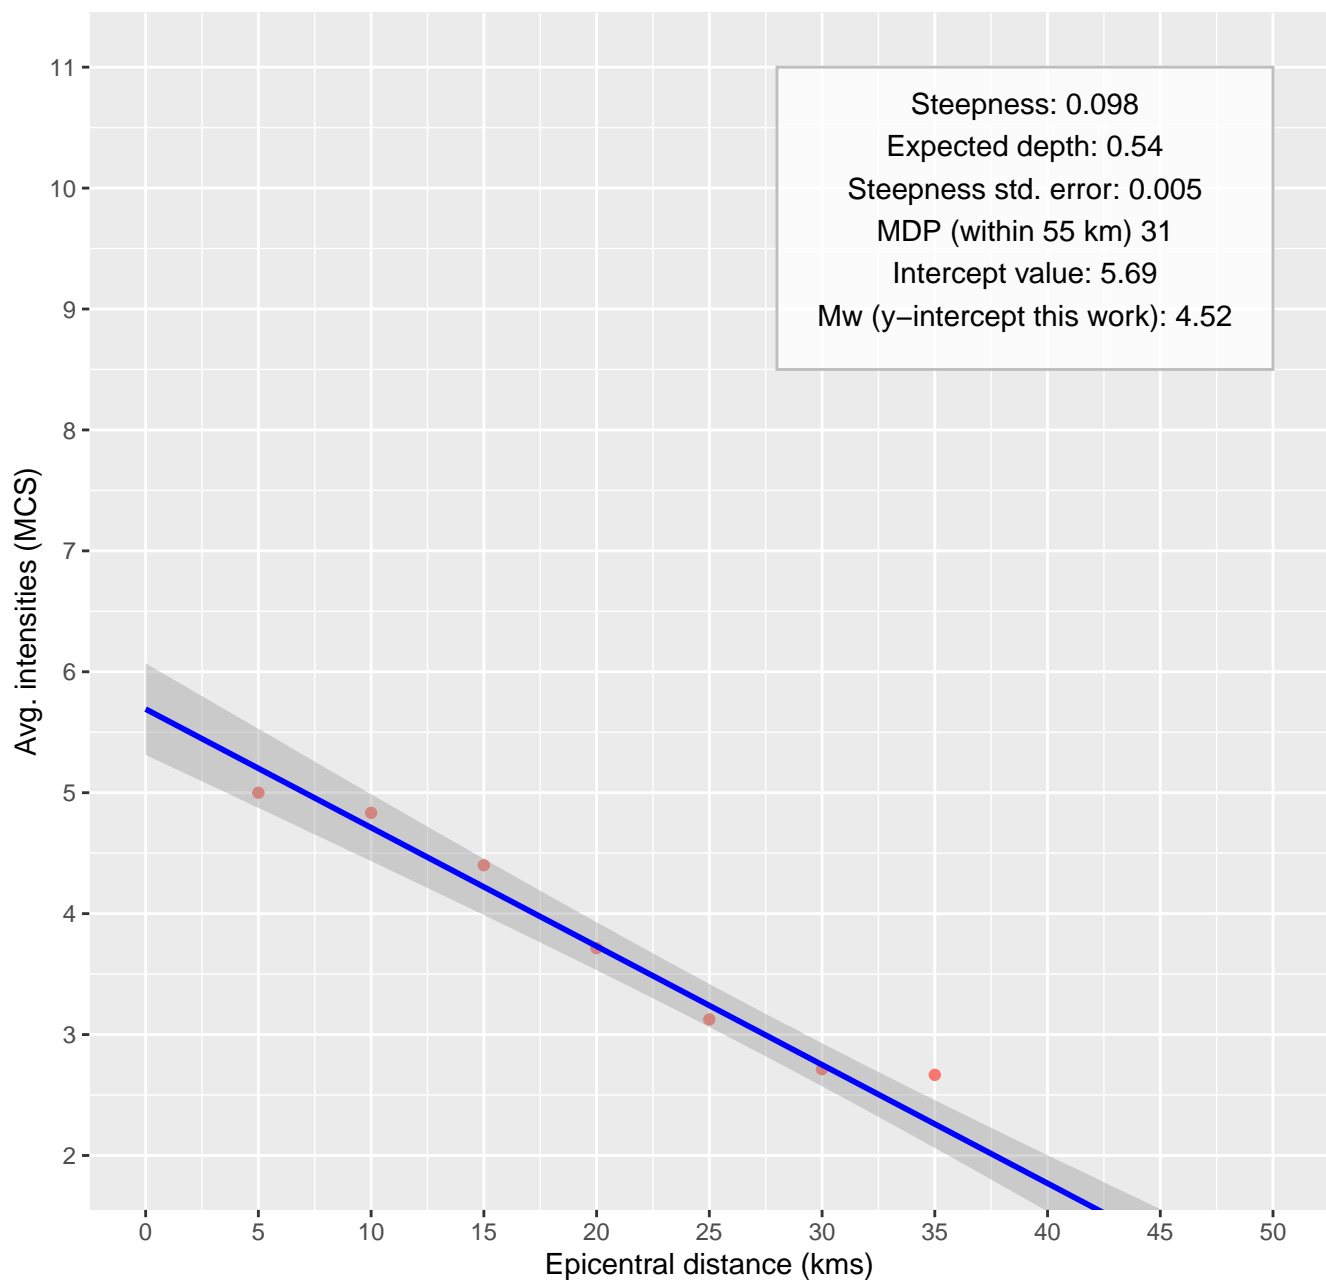

Supplement: Supplementary file 158 [file nhess-23-1007-2023-supplement.zip]

# DBMI\_ 18950413\_1501\_000 | 1895-04-13 – Monti Iblei ?

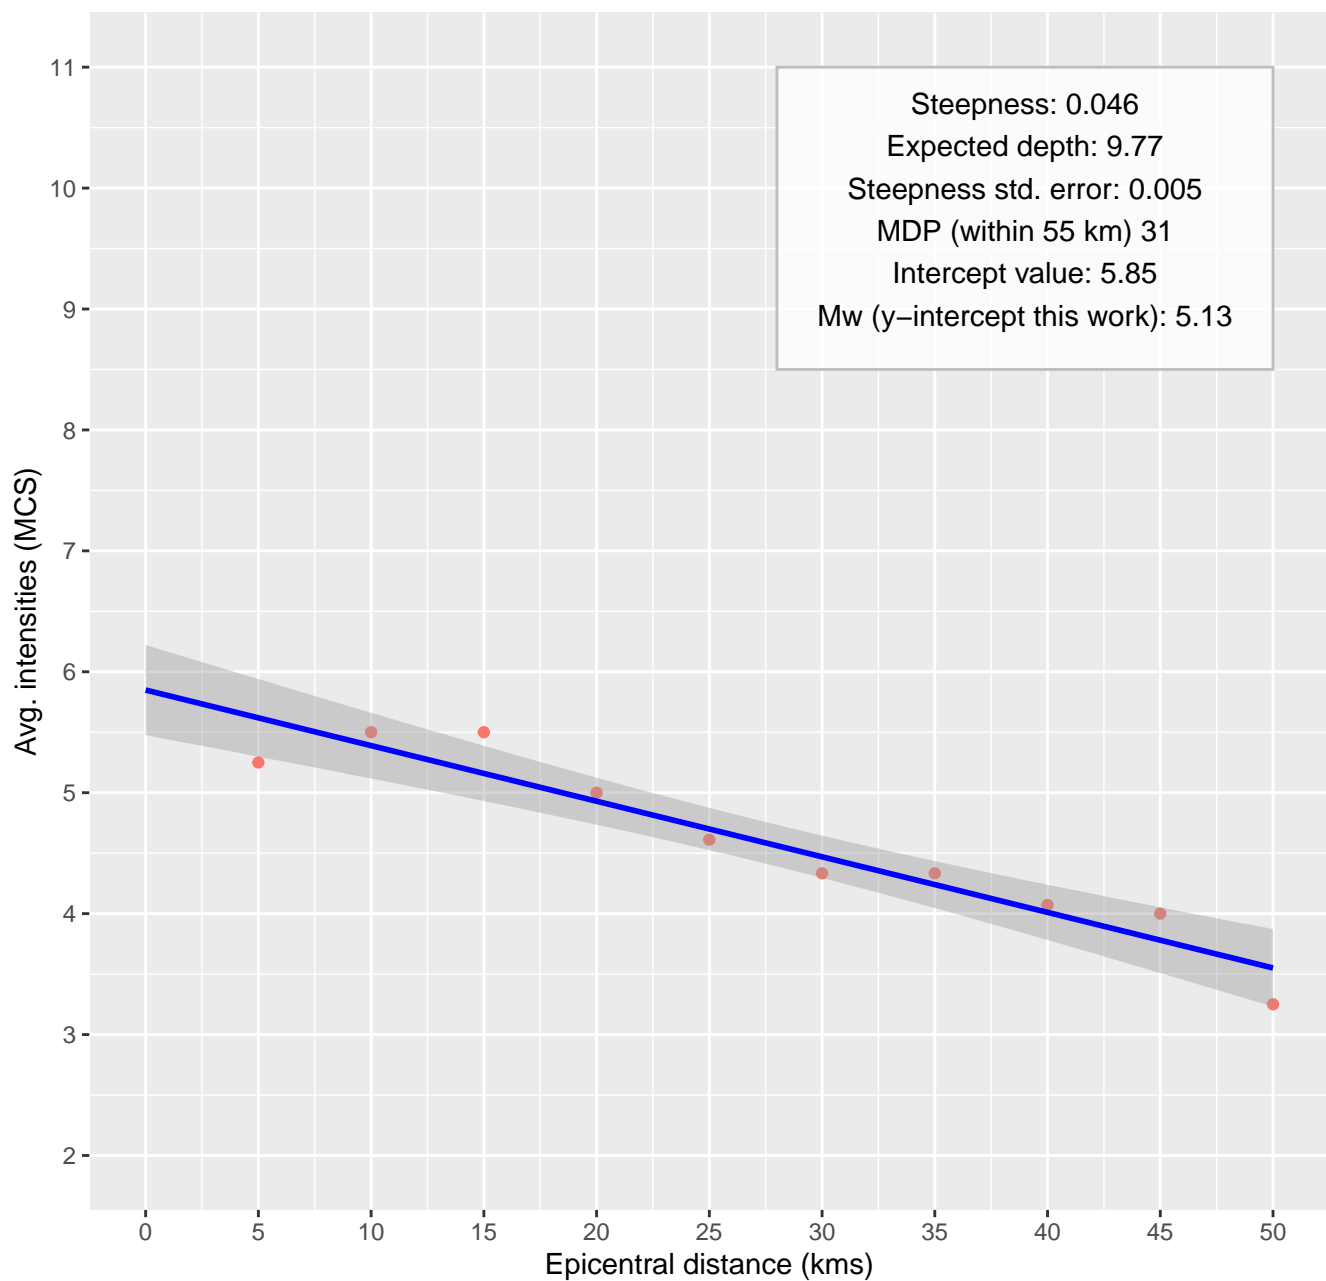

Supplement: Supplementary file 159 [file nhess-23-1007-2023-supplement.zip]

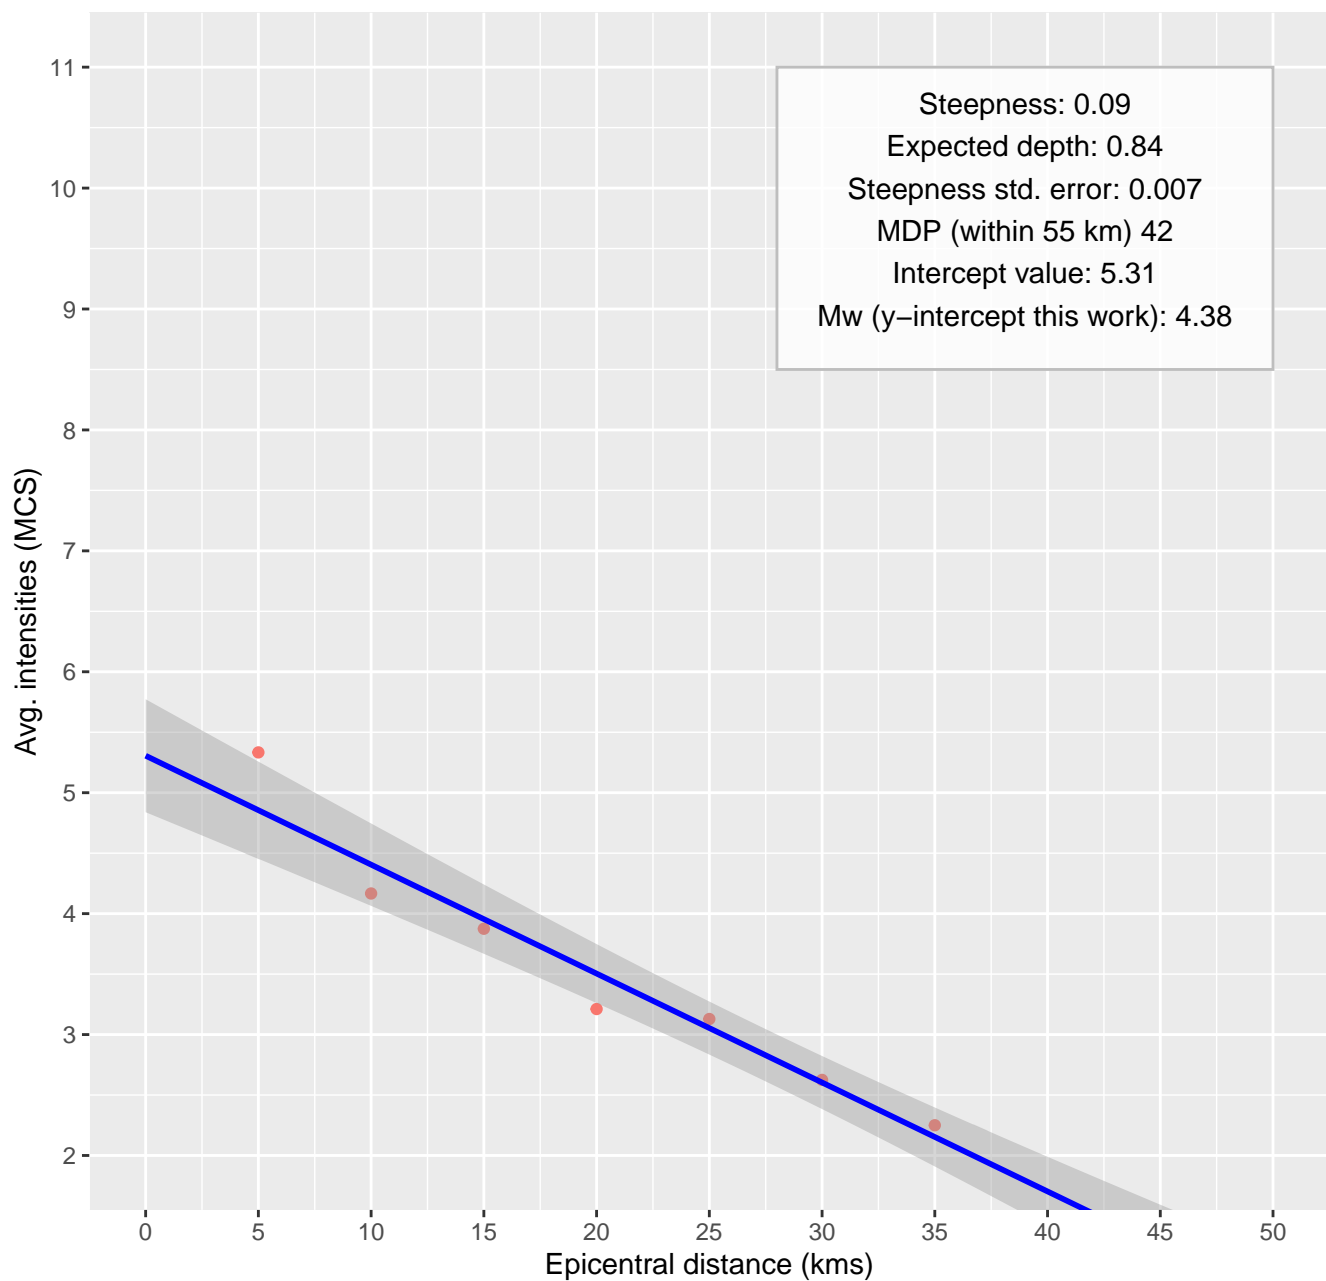

Supplement: Supplementary file 160 [file nhess-23-1007-2023-supplement.zip]

# DBMI\_ 18910509\_0016\_000 | 1891-05-09 – Val Roveto

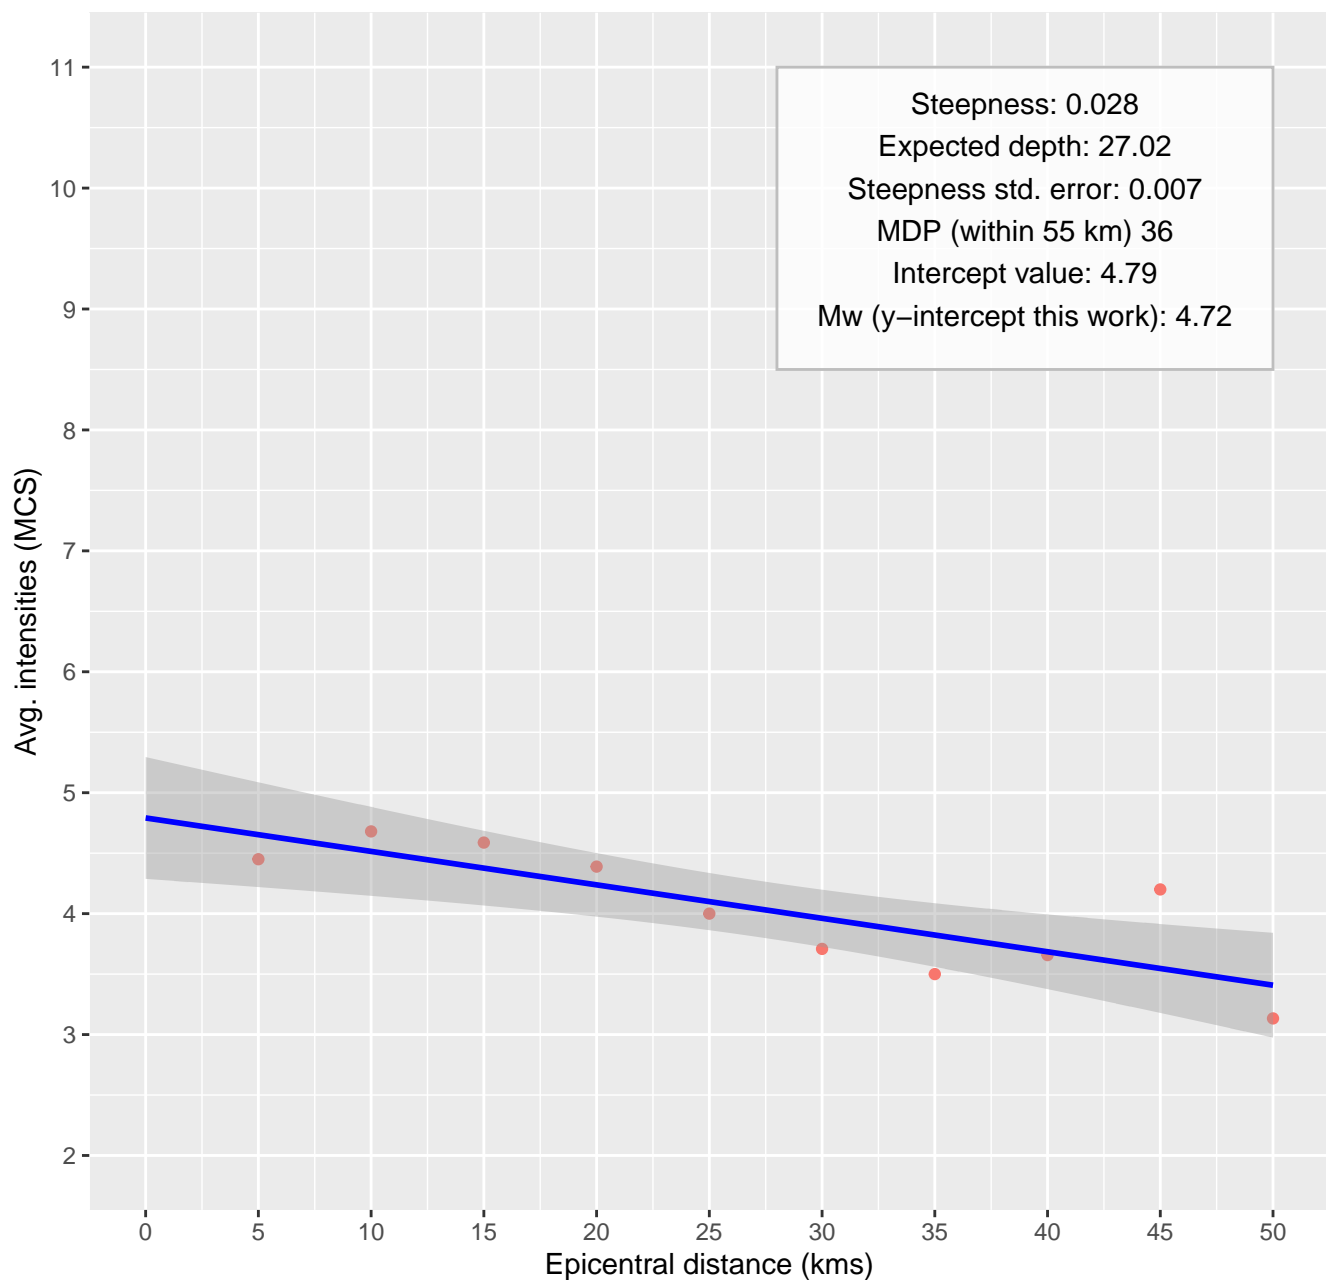

Supplement: Supplementary file 161 [file nhess-23-1007-2023-supplement.zip]

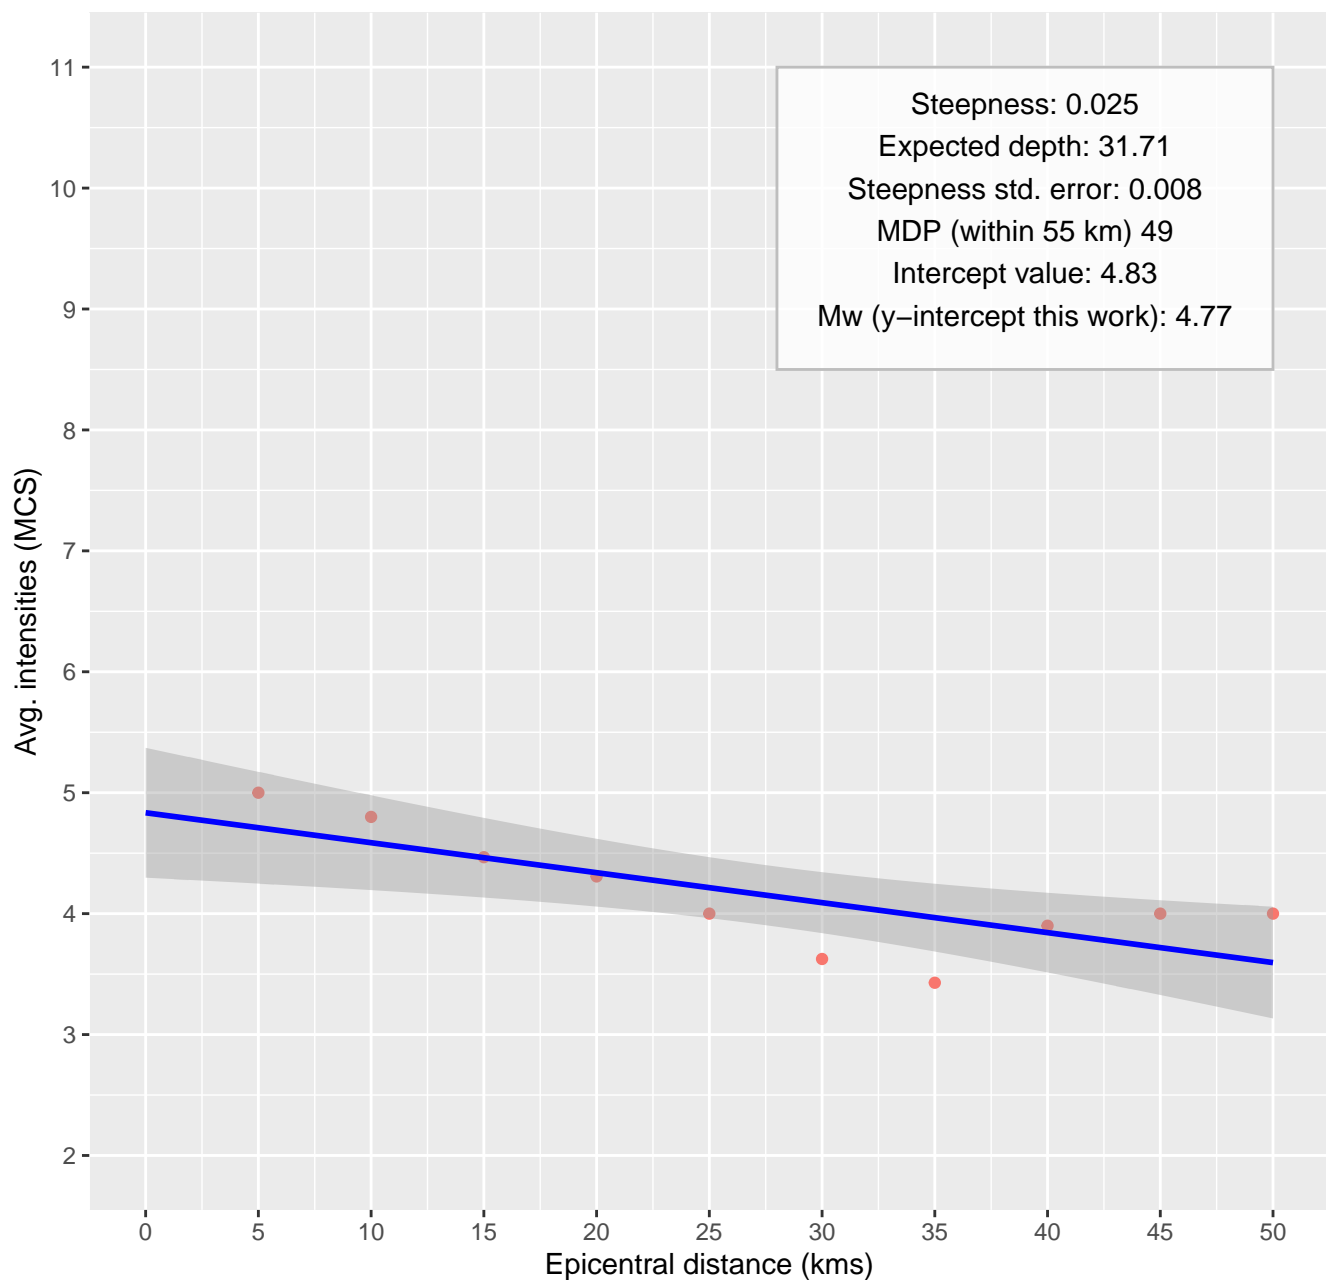

Supplement: Supplementary file 162 [file nhess-23-1007-2023-supplement.zip]

# DBMI\_ 19680115\_0201\_000 | 1968-01-15 – Valle del Belice

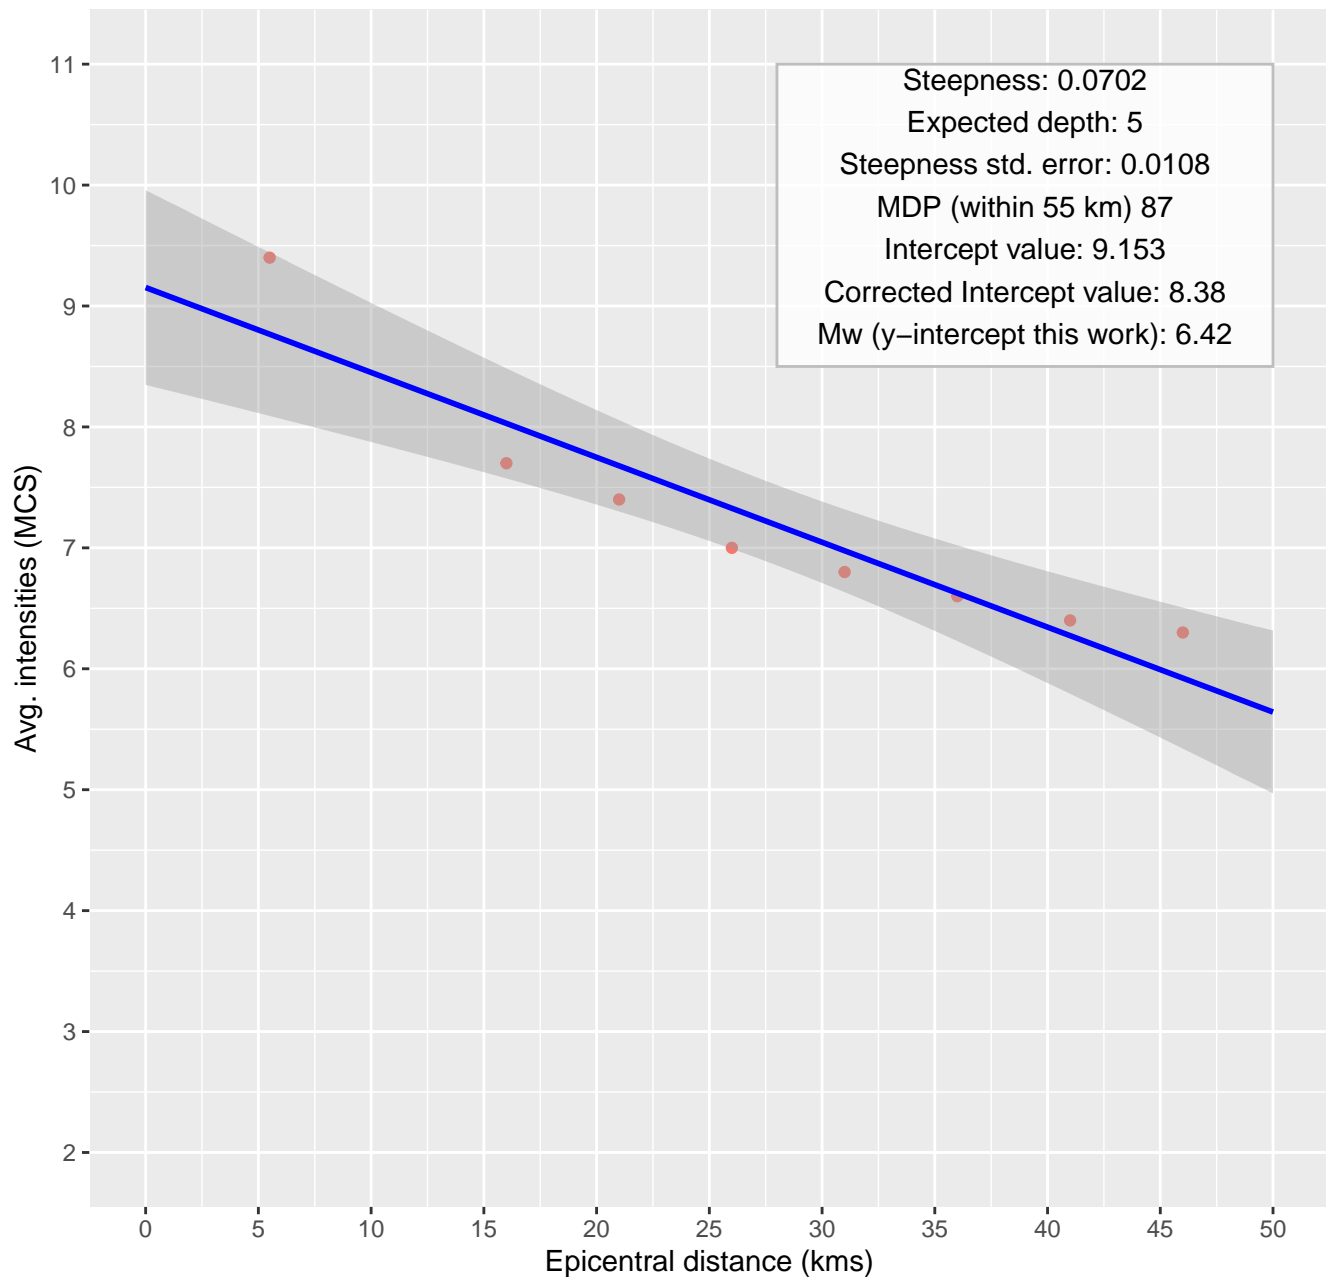

Supplement: Supplementary file 163 [file nhess-23-1007-2023-supplement.zip]

# DBMI\_ 18941127\_0507\_000 | 1894-11-27 – Bresciano

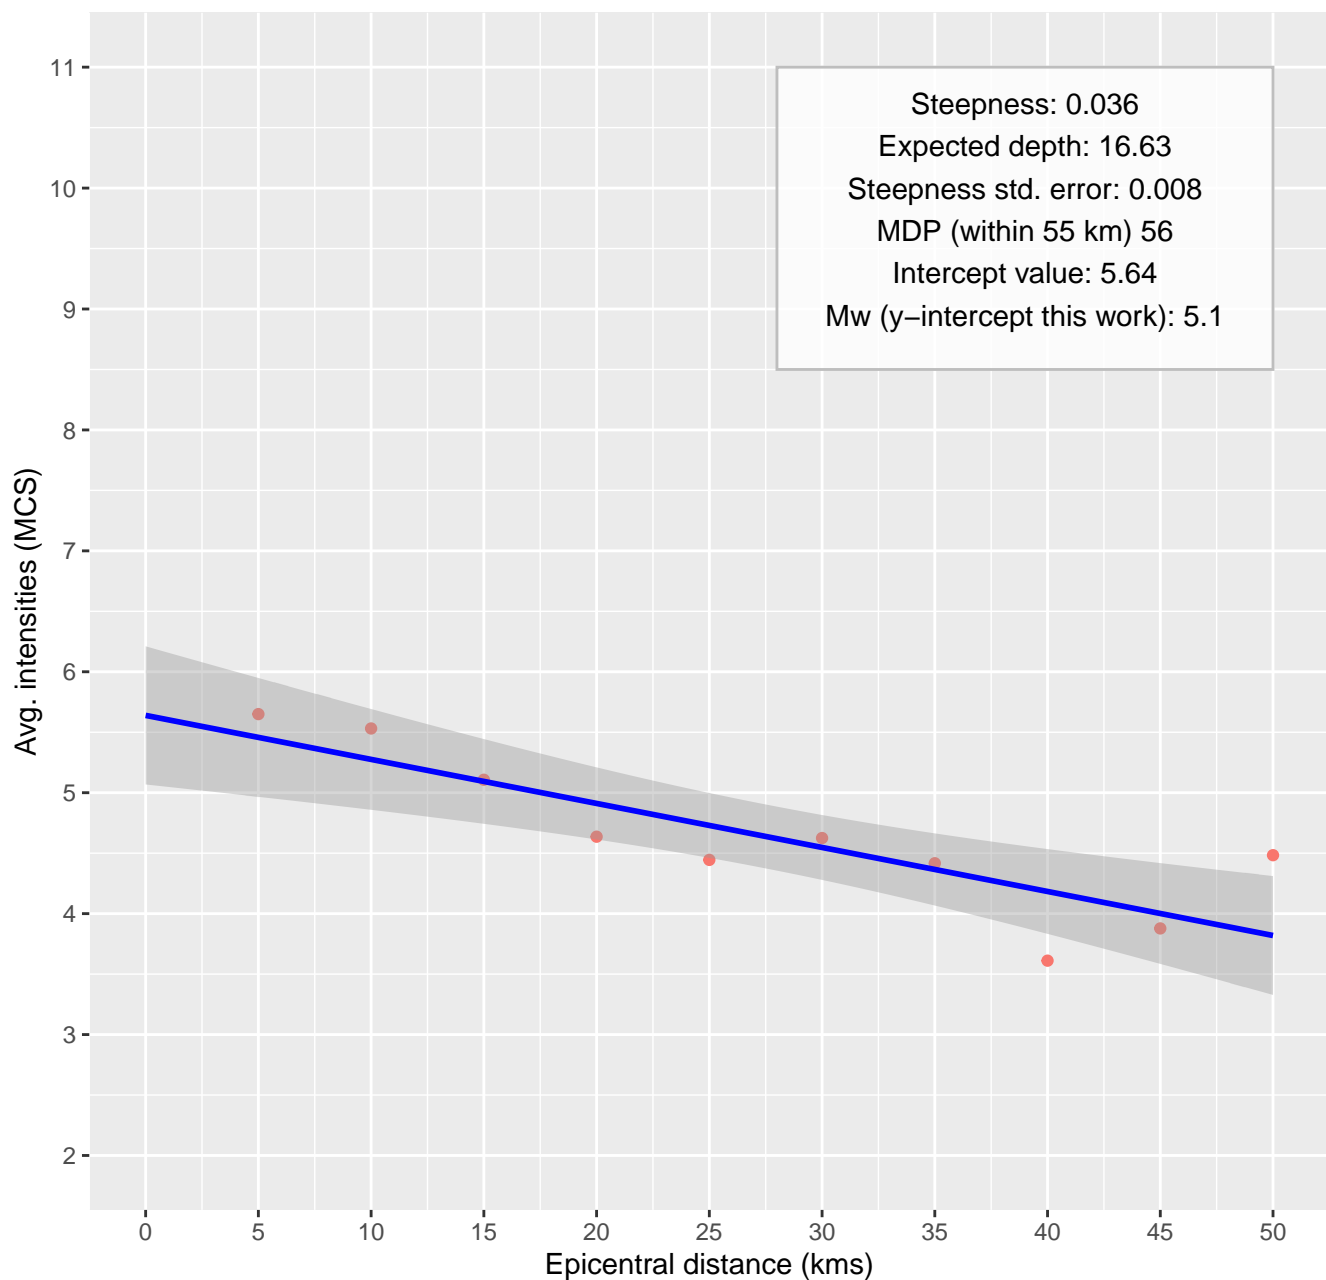

Supplement: Supplementary file 164 [file nhess-23-1007-2023-supplement.zip]

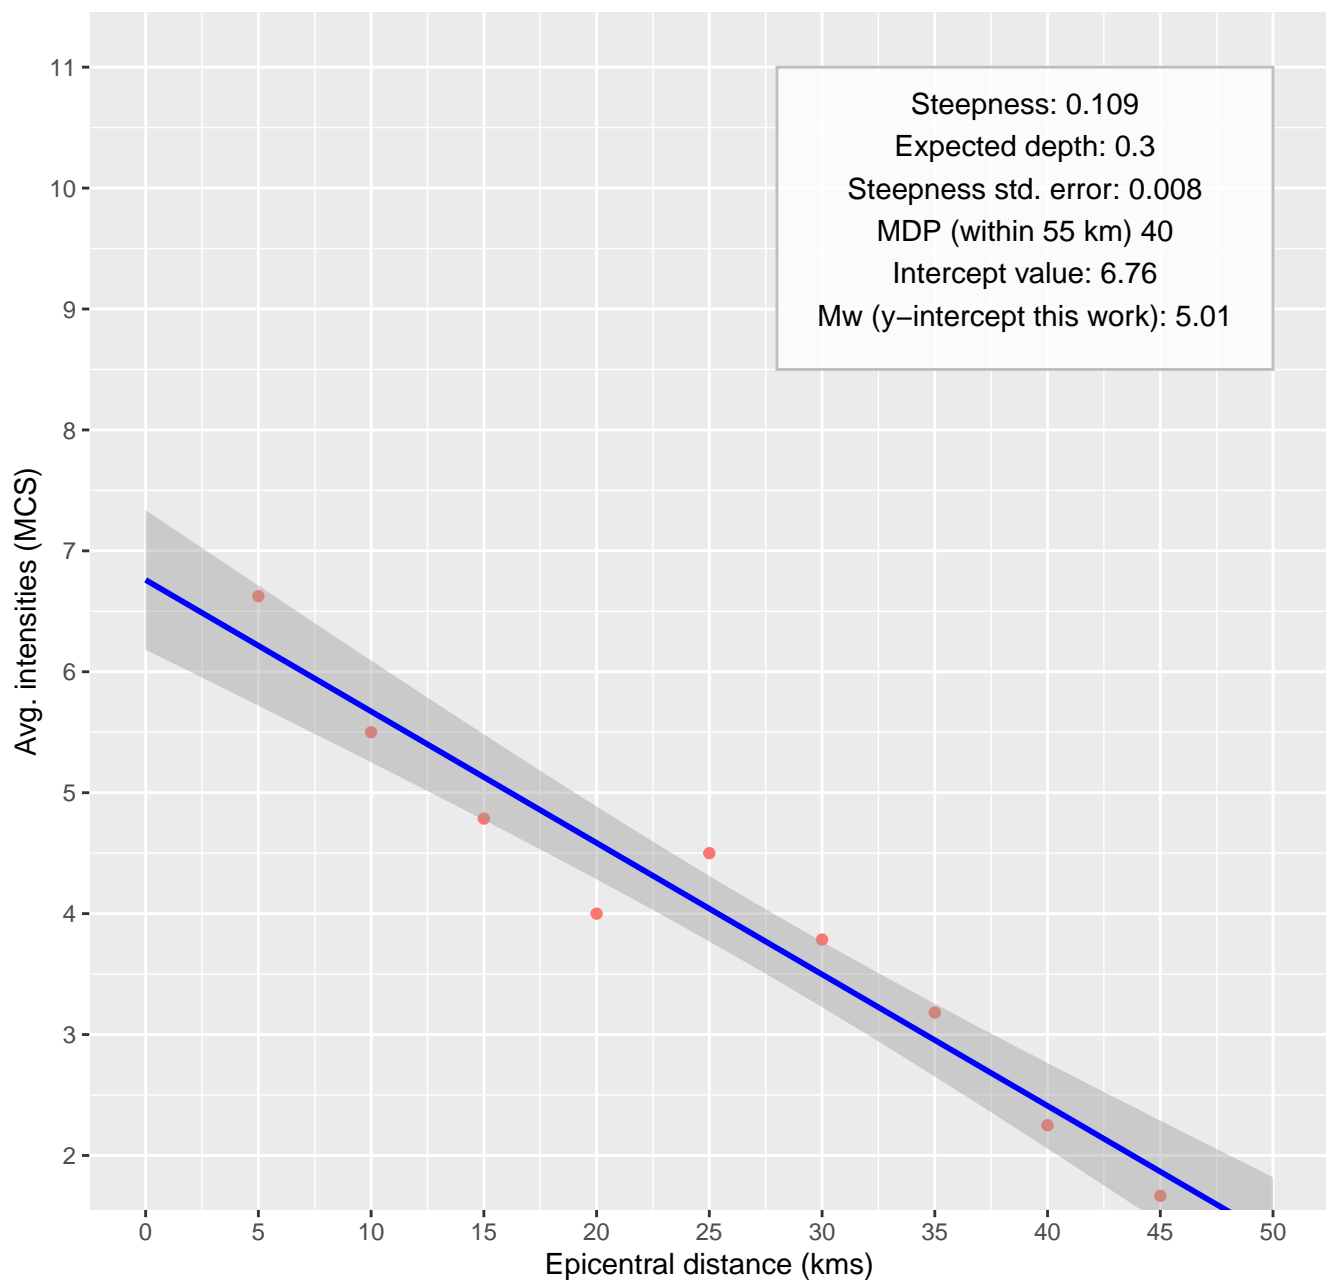

Supplement: Supplementary file 165 [file nhess-23-1007-2023-supplement.zip]

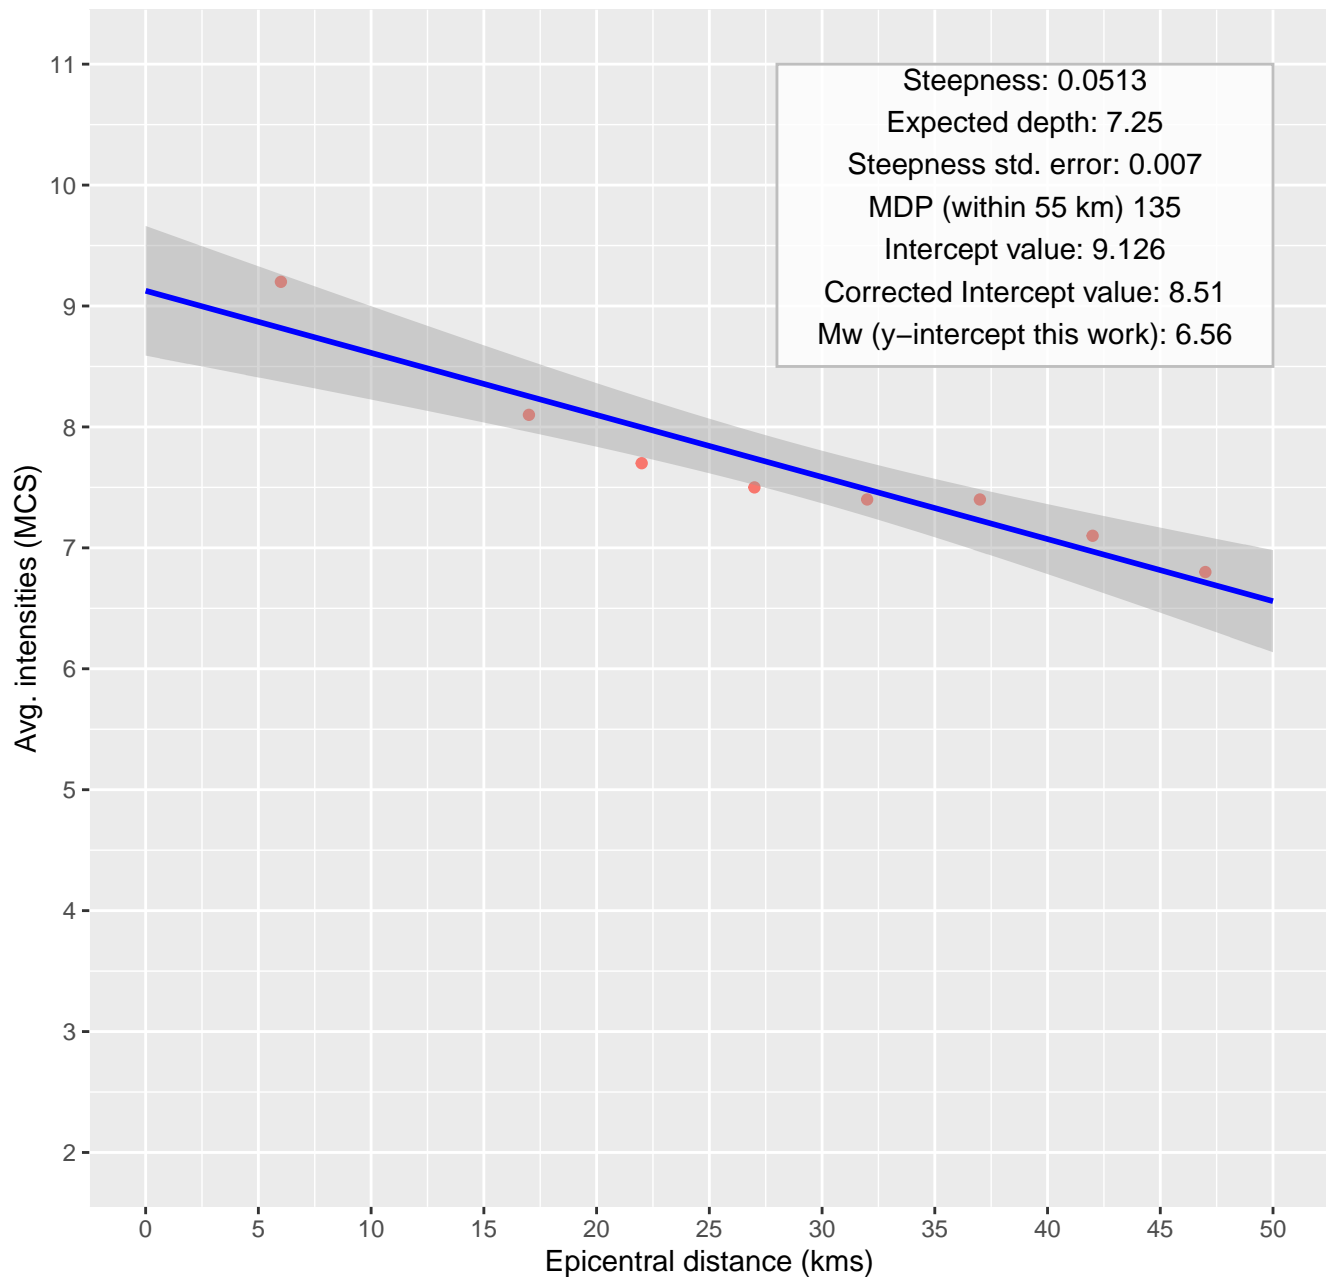

Supplement: Supplementary file 166 [file nhess-23-1007-2023-supplement.zip]

# DBMI\_ 19520704\_2035\_000 | 1952-07-04 – Appennino forlivese

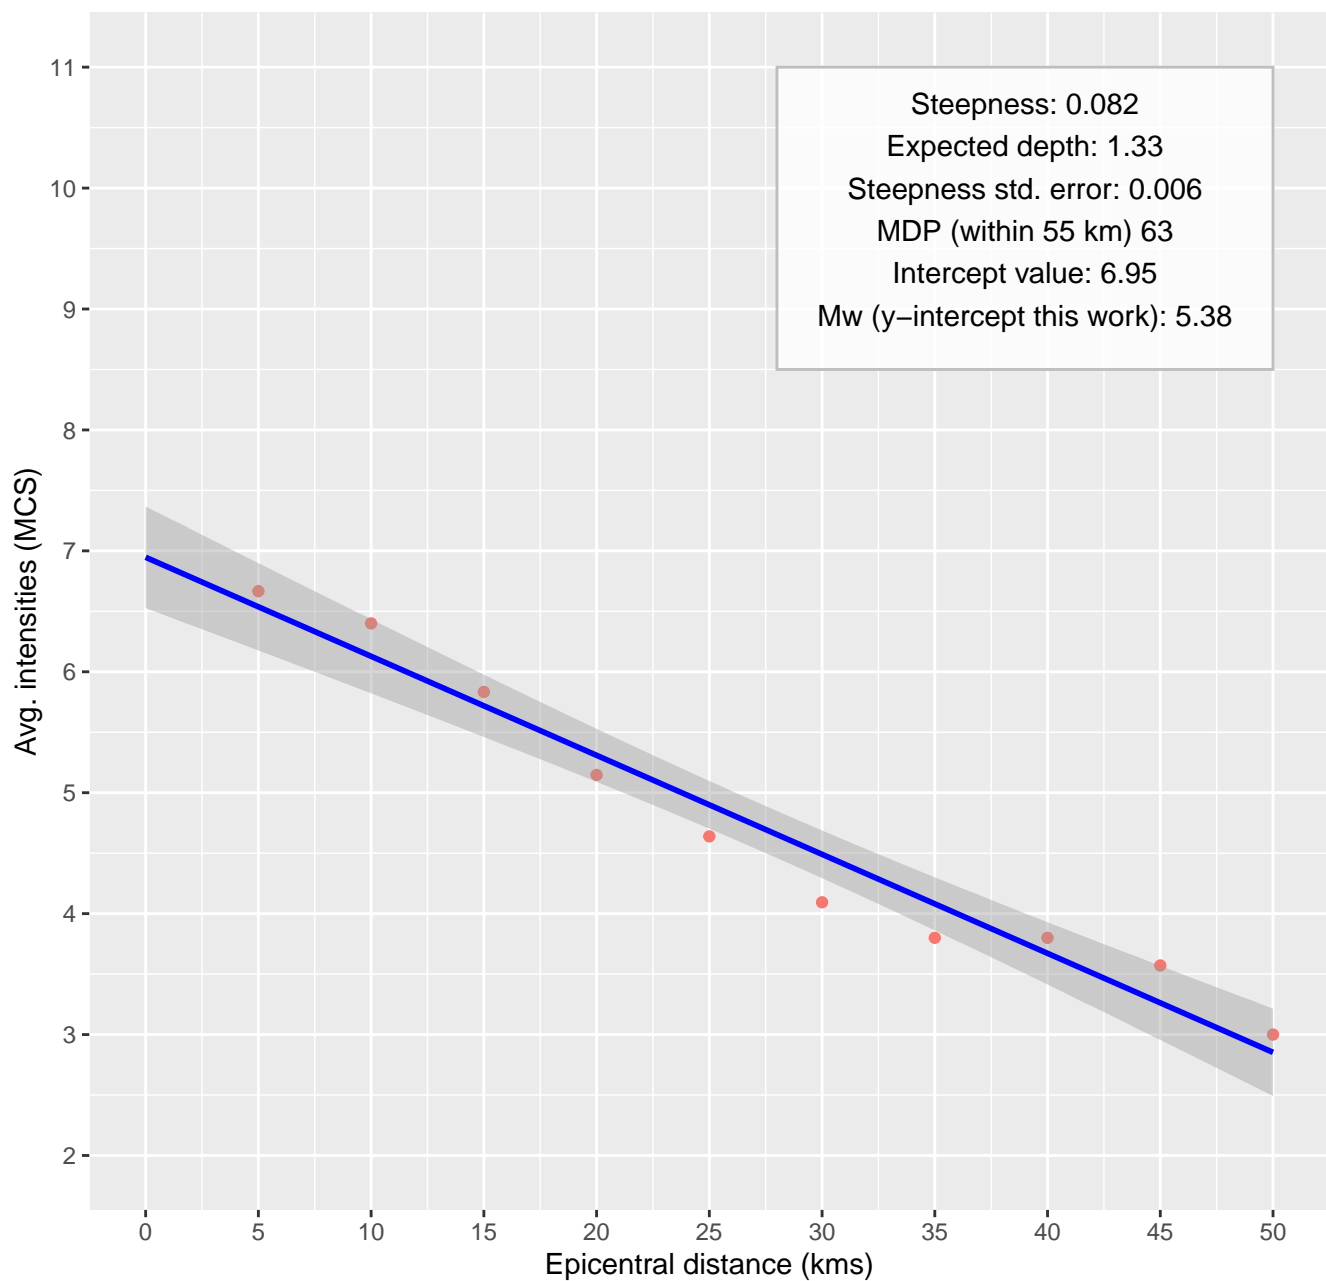

Supplement: Supplementary file 167 [file nhess-23-1007-2023-supplement.zip]

# DBMI\_ 18860905\_0000\_000 | 1886-09-05 – Torinese

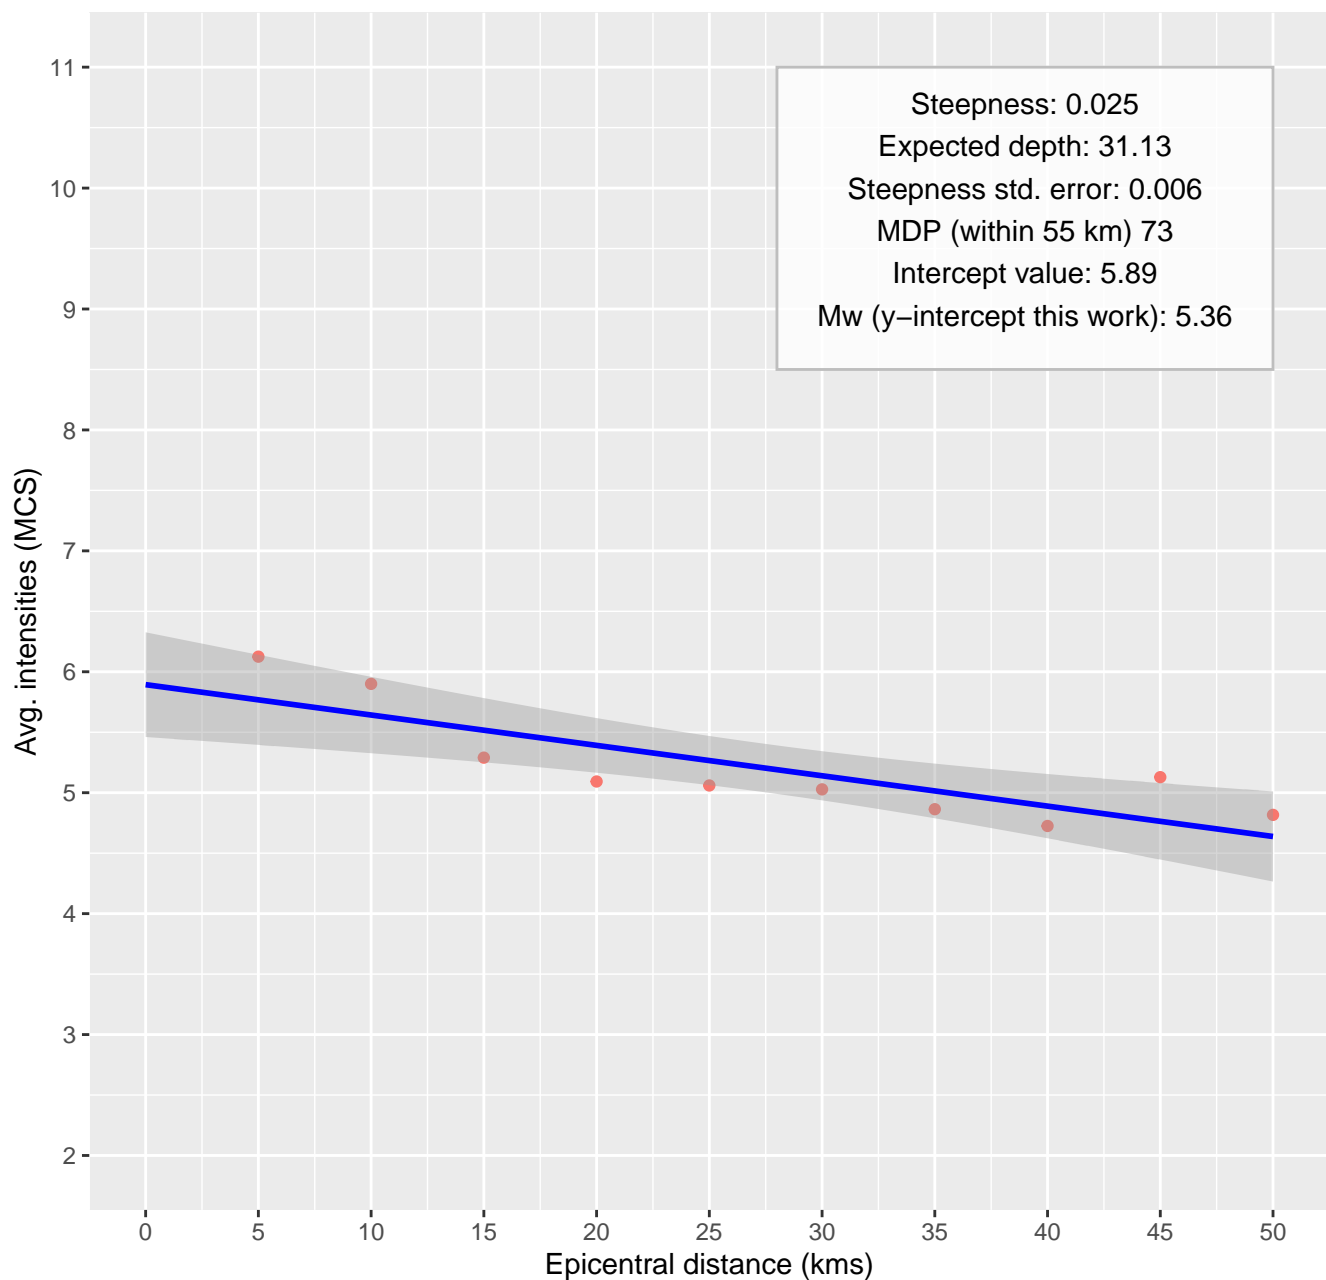

Supplement: Supplementary file 168 [file nhess-23-1007-2023-supplement.zip]

# DBMI\_ 19581027\_1009\_000 | 1958-10-27 – Catanzarese

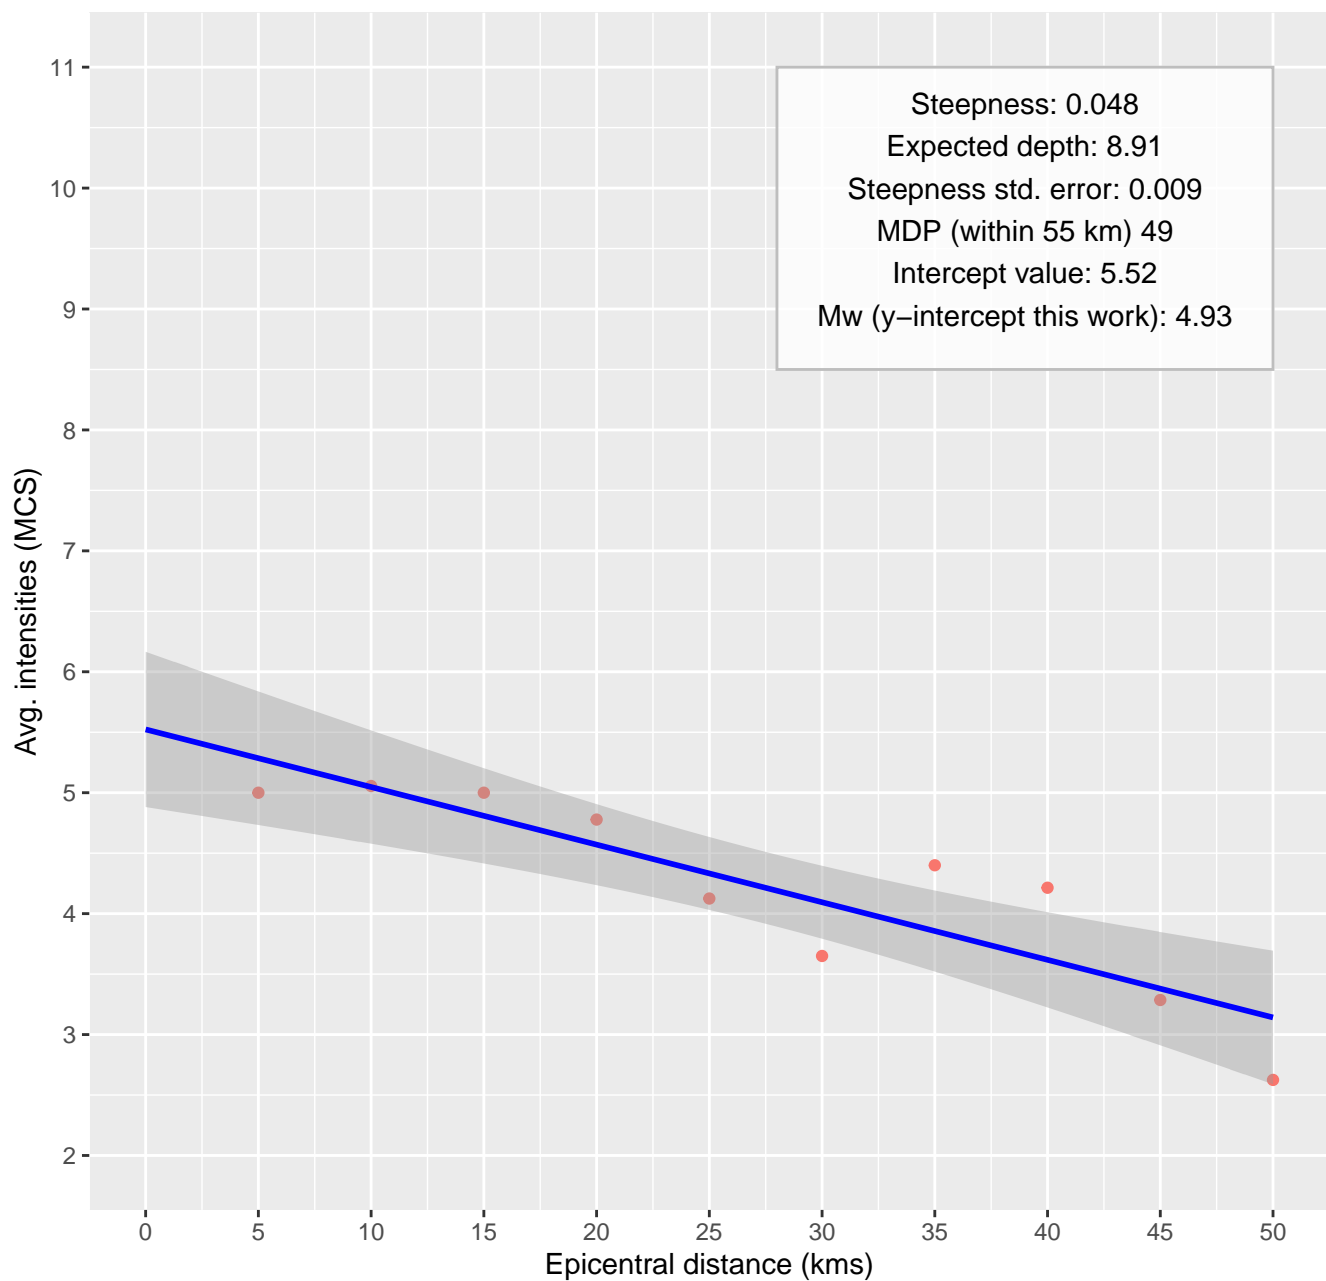

Supplement: Supplementary file 169 [file nhess-23-1007-2023-supplement.zip]

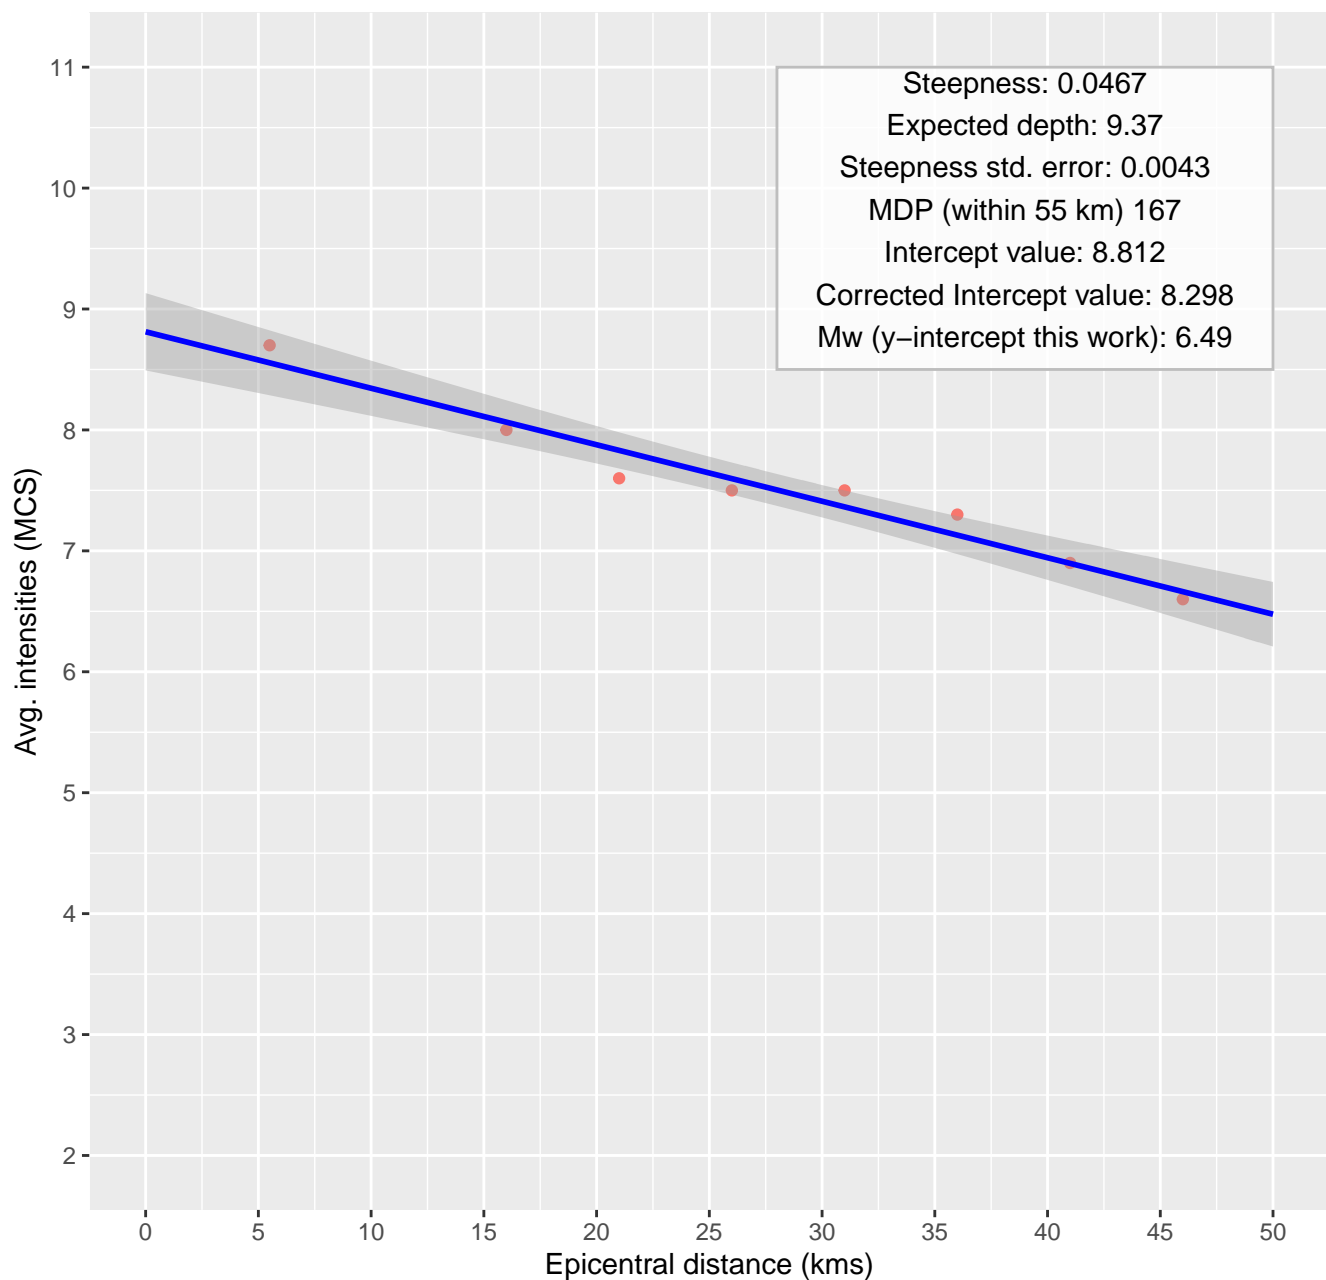

Supplement: Supplementary file 170 [file nhess-23-1007-2023-supplement.zip]

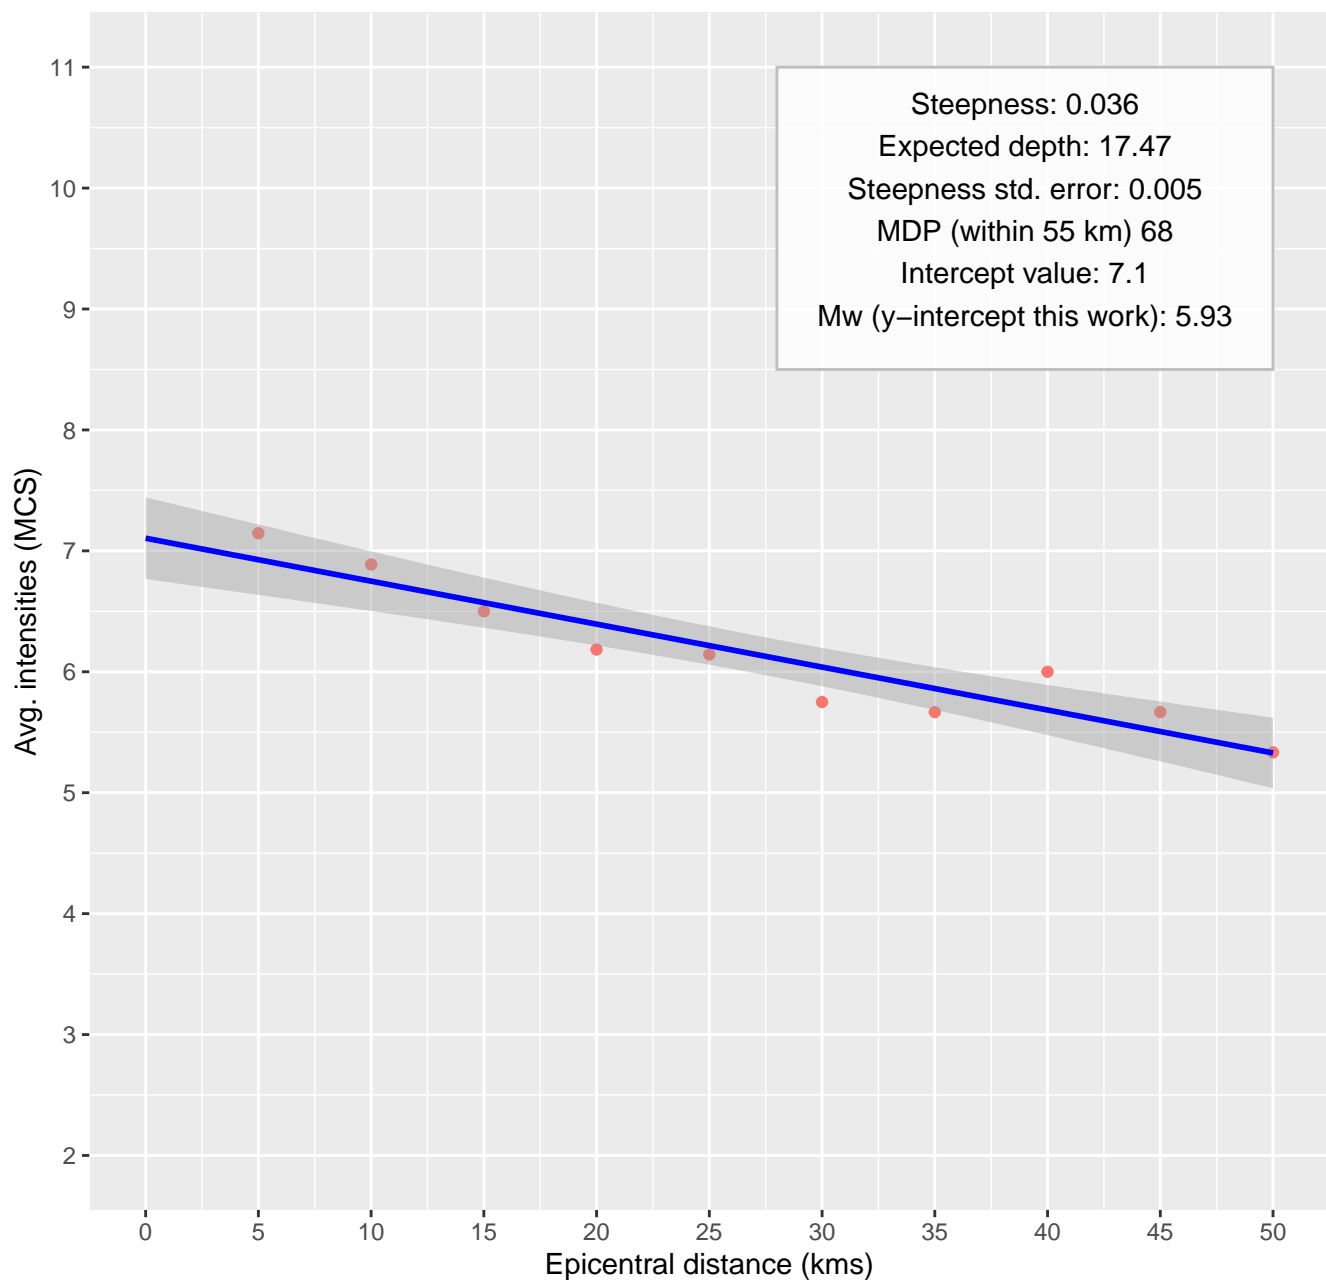

Supplement: Supplementary file 171 [file nhess-23-1007-2023-supplement.zip]

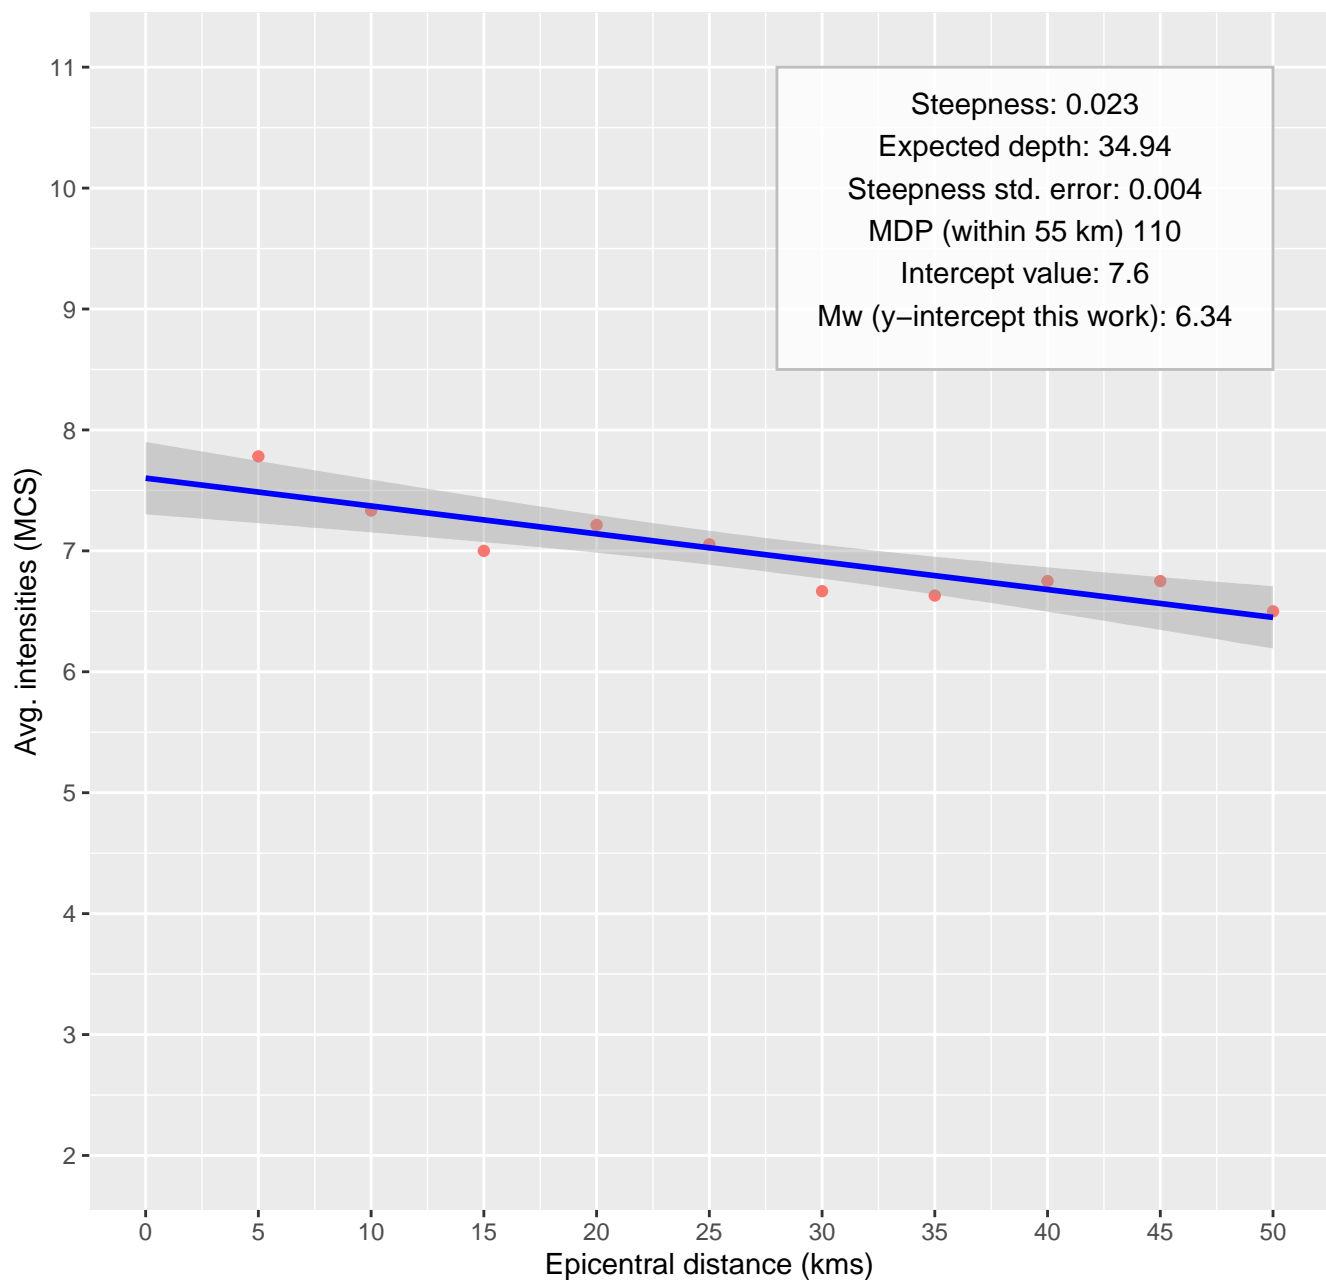

Supplement: Supplementary file 172 [file nhess-23-1007-2023-supplement.zip]

# DBMI\_ 19611123\_0112\_000 | 1961-11-23 – Prealpi bergamasche

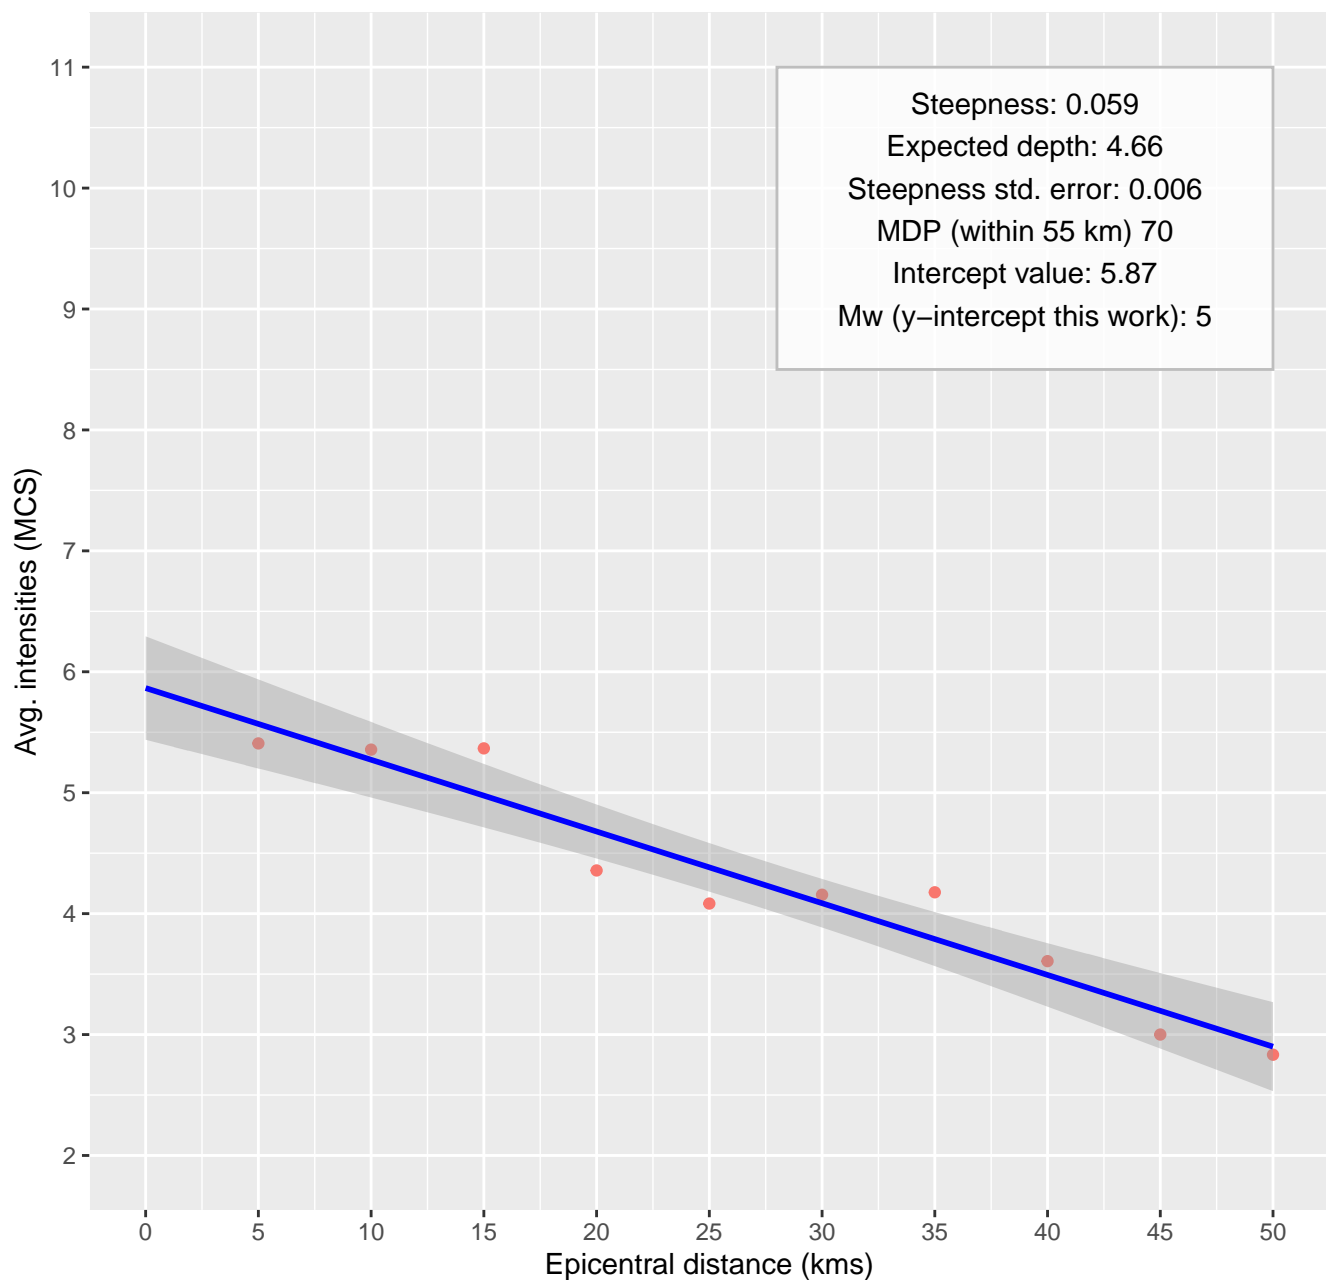

Supplement: Supplementary file 173 [file nhess-23-1007-2023-supplement.zip]

# DBMI\_ 16380608\_0945\_000 | 1638-06-08 – Crotonese

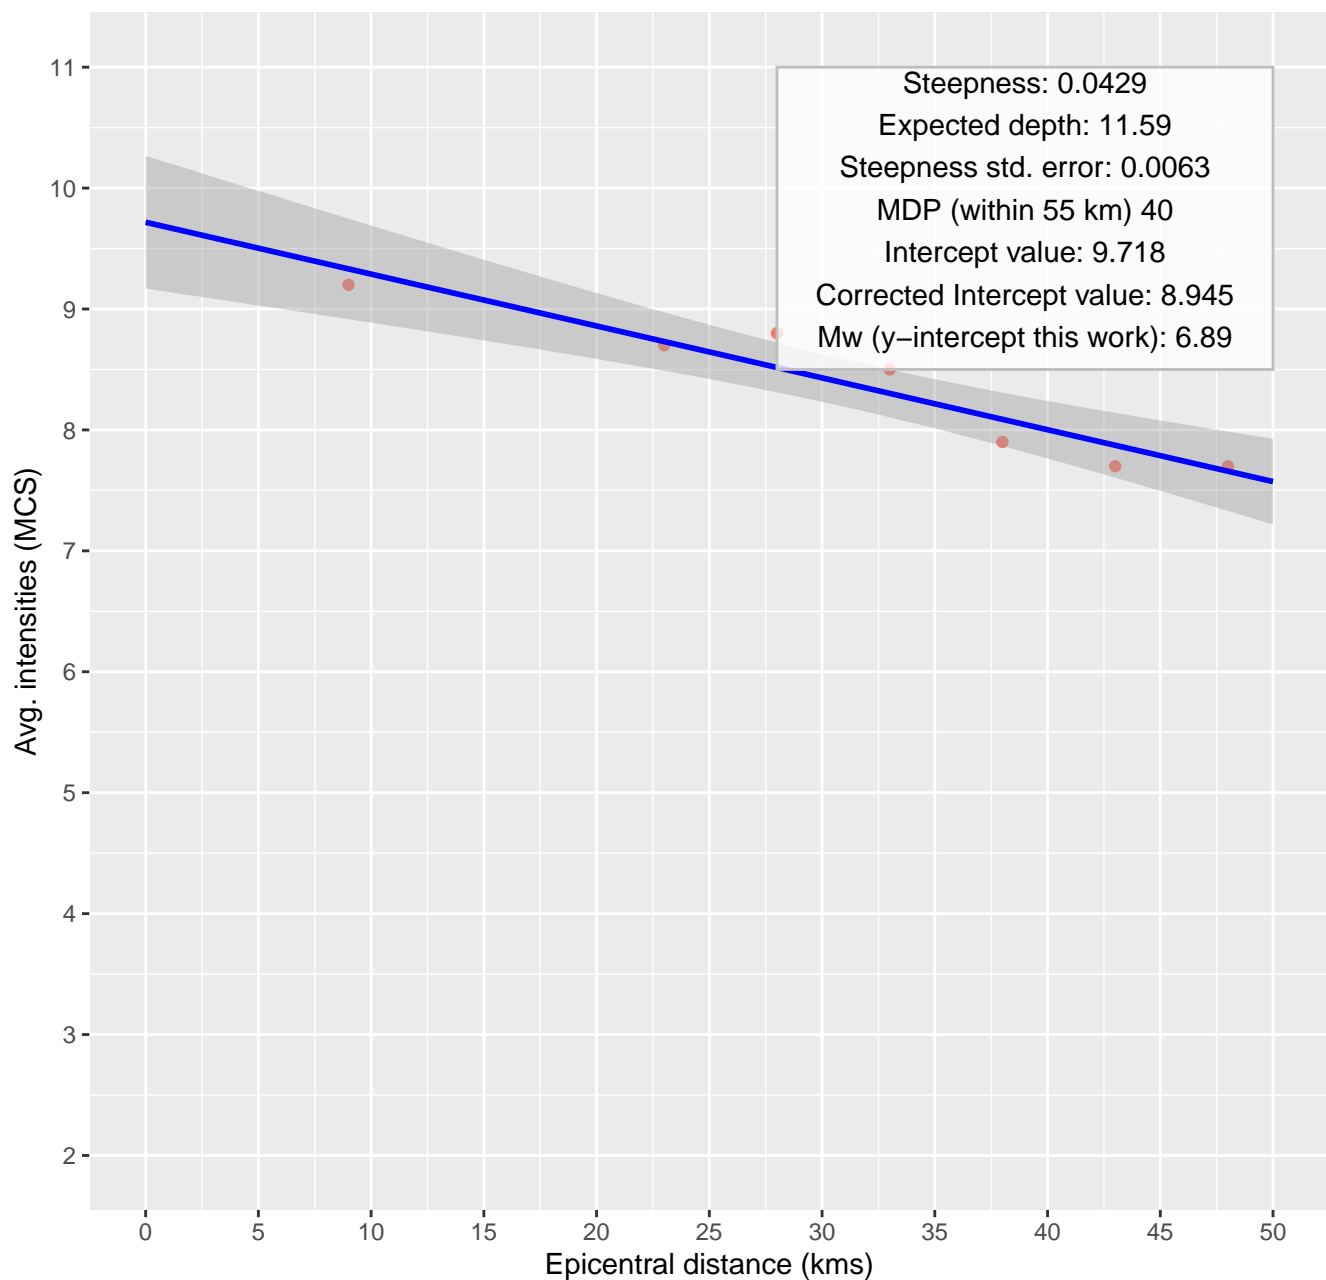

Supplement: Supplementary file 174 [file nhess-23-1007-2023-supplement.zip]

# DBMI\_ 19301030\_0713\_000 | 1930-10-30 – Senigallia

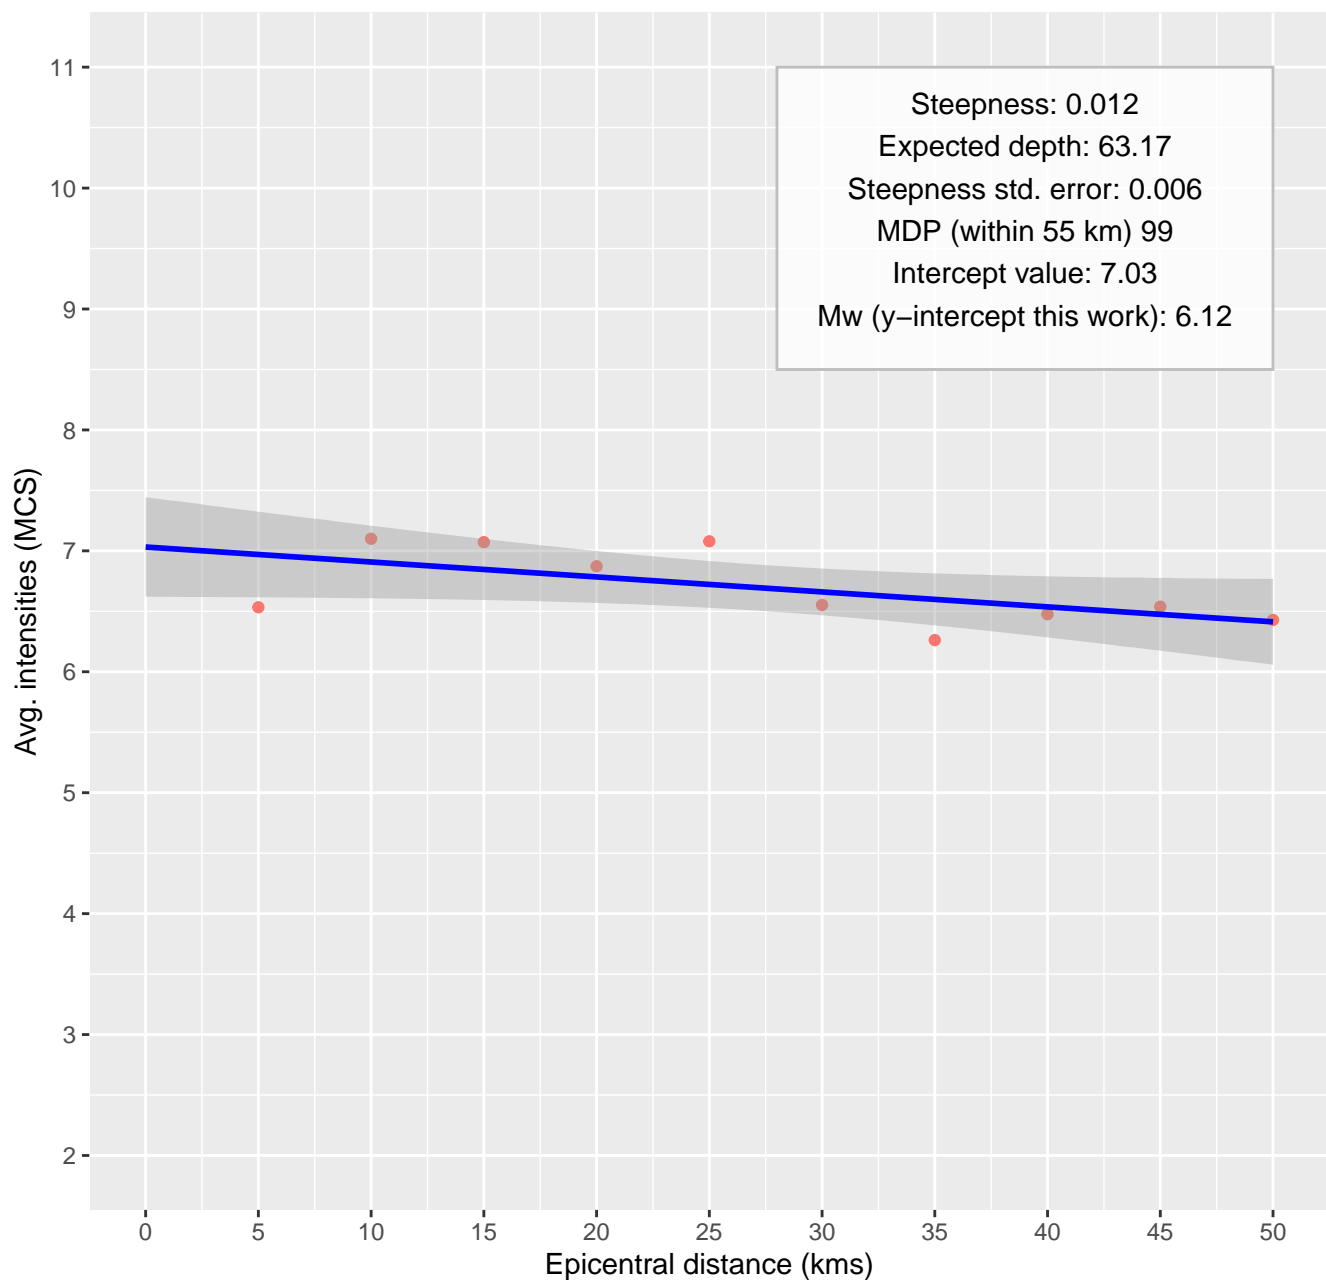

Supplement: Supplementary file 175 [file nhess-23-1007-2023-supplement.zip]

# DBMI\_ 19690702\_0755\_000 | 1969-07-02 – Monti della Tolfa

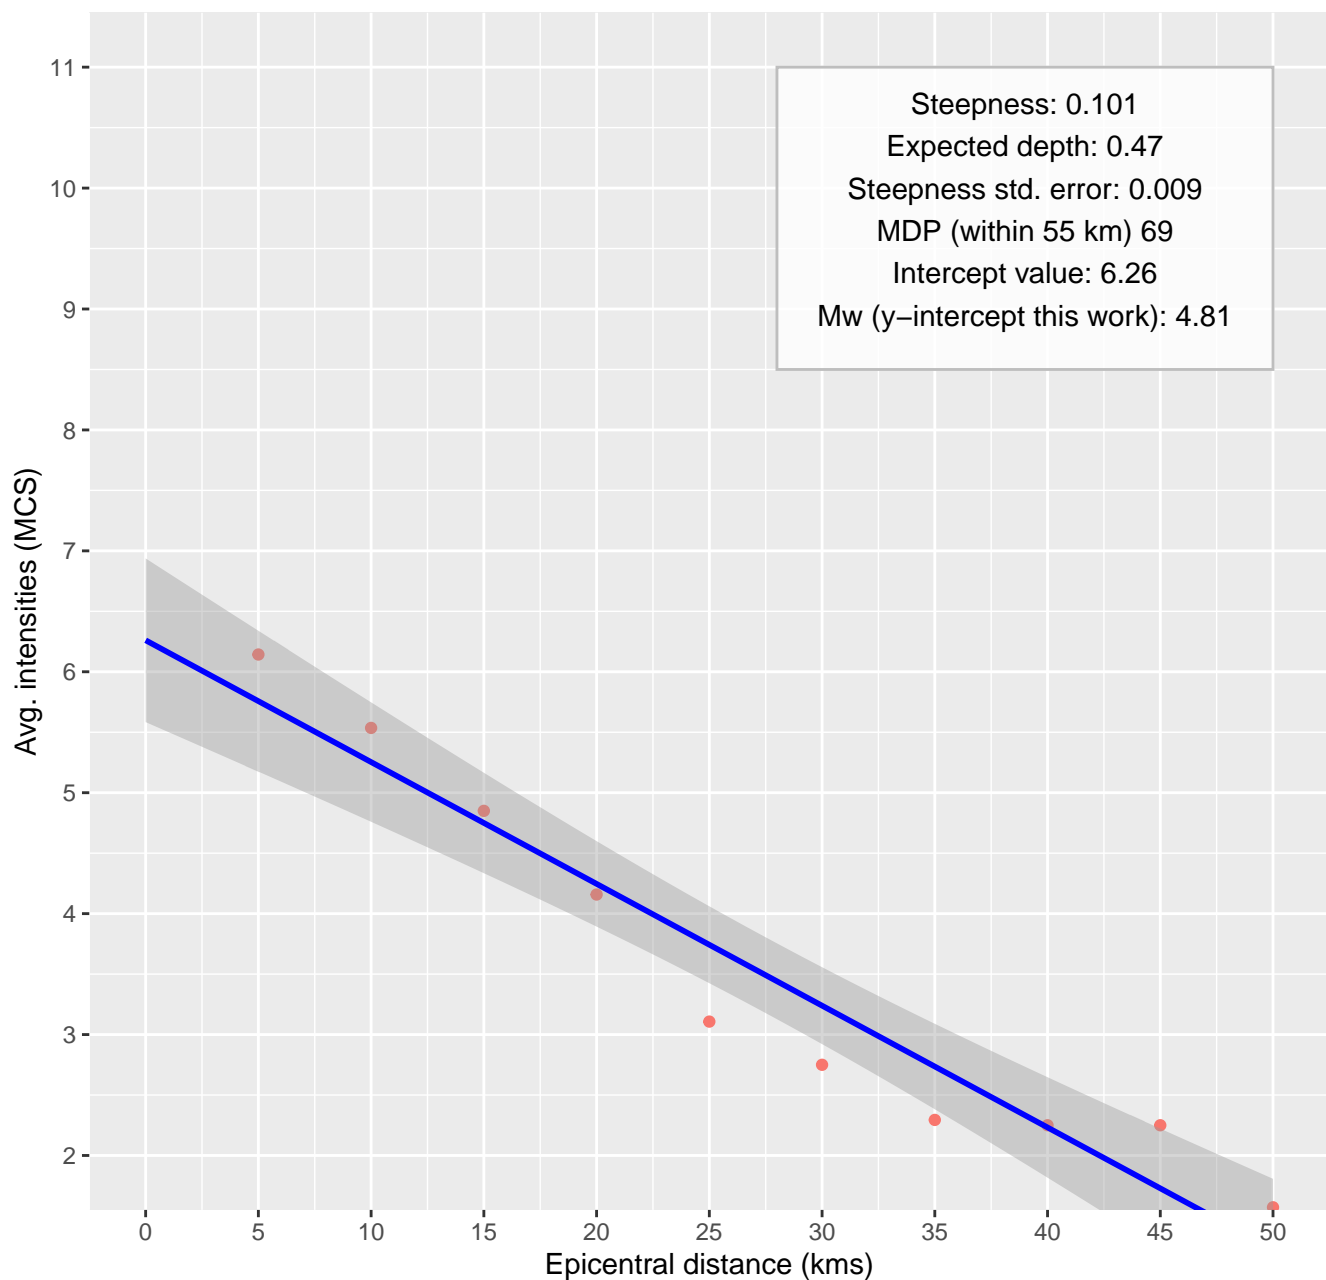

Supplement: Supplementary file 176 [file nhess-23-1007-2023-supplement.zip]

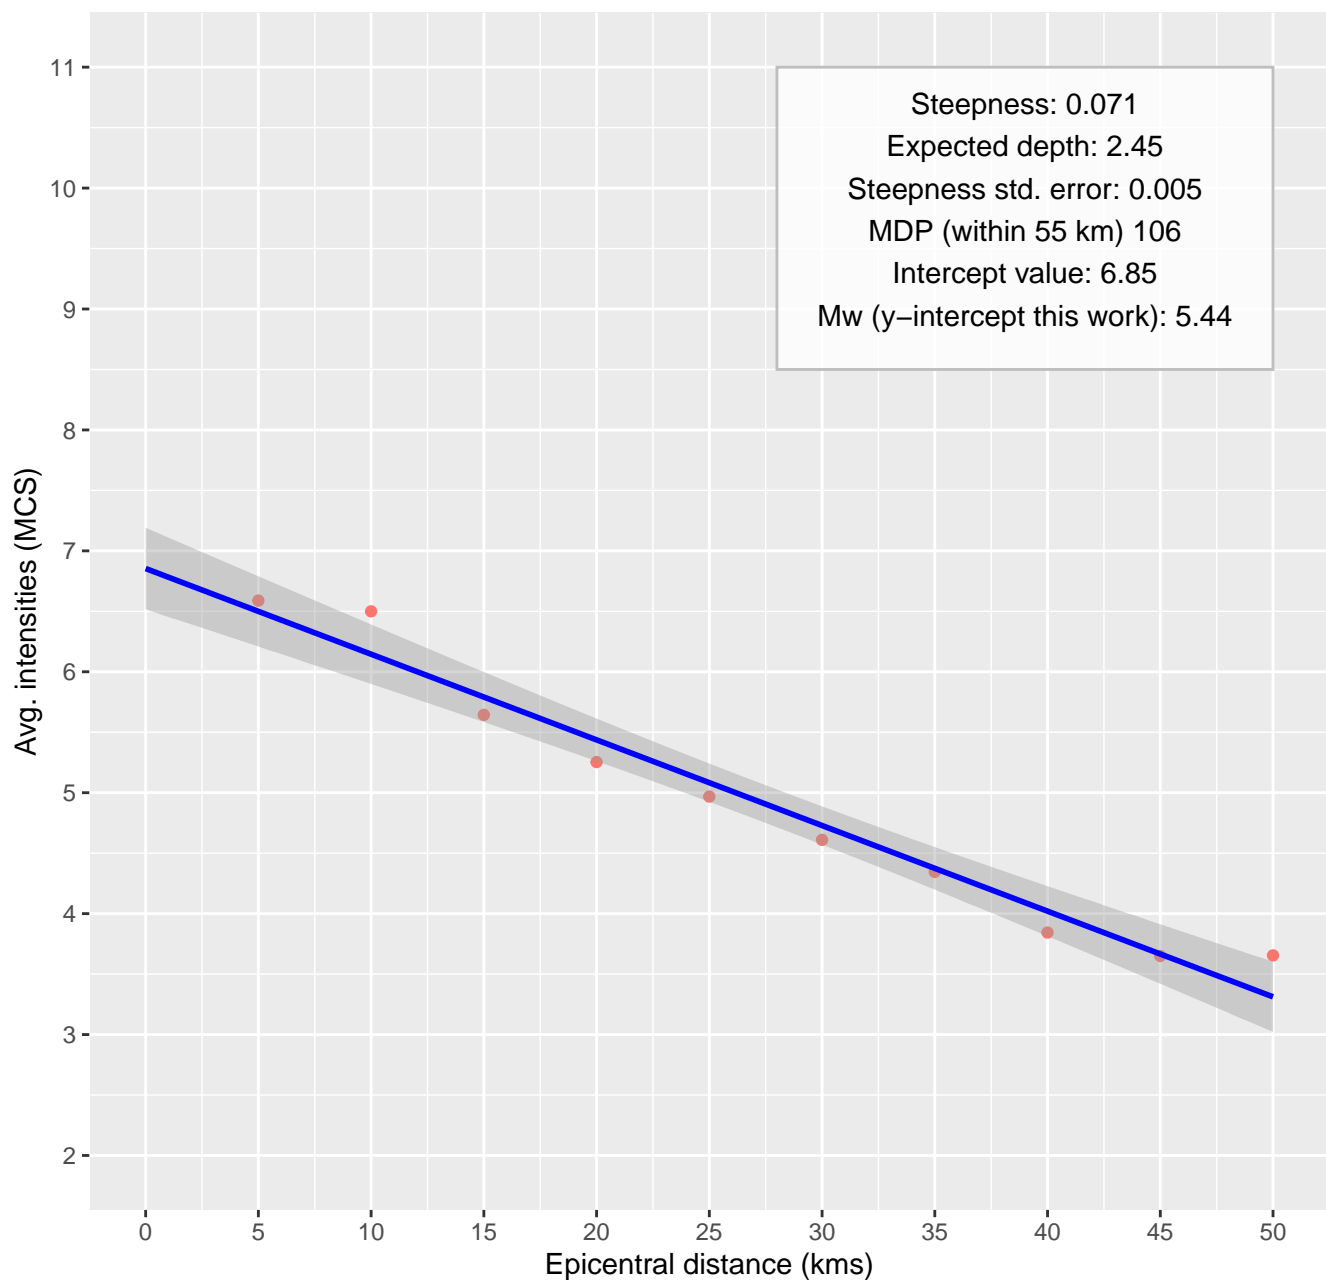

Supplement: Supplementary file 177 [file nhess-23-1007-2023-supplement.zip]

# DBMI\_ 17830328\_1855\_000 | 1783-03-28 – Calabria centrale

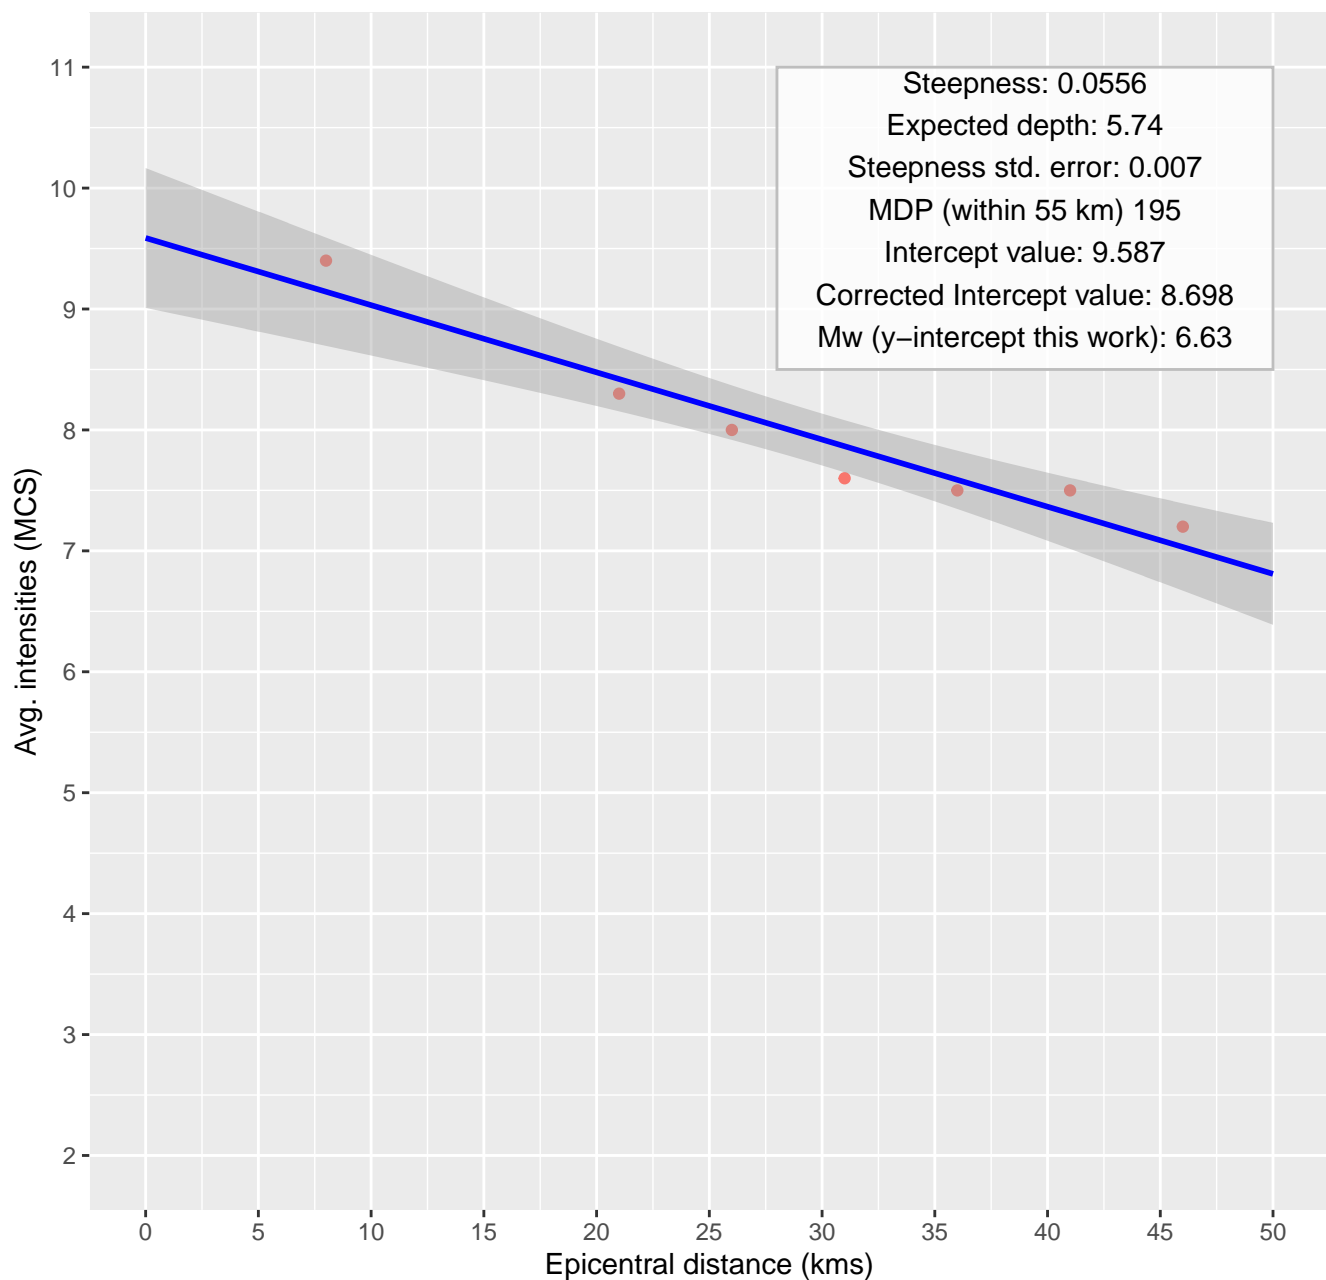

Supplement: Supplementary file 178 [file nhess-23-1007-2023-supplement.zip]

# DBMI\_ 16591105\_2215\_000 | 1659-11-05 – Calabria centrale

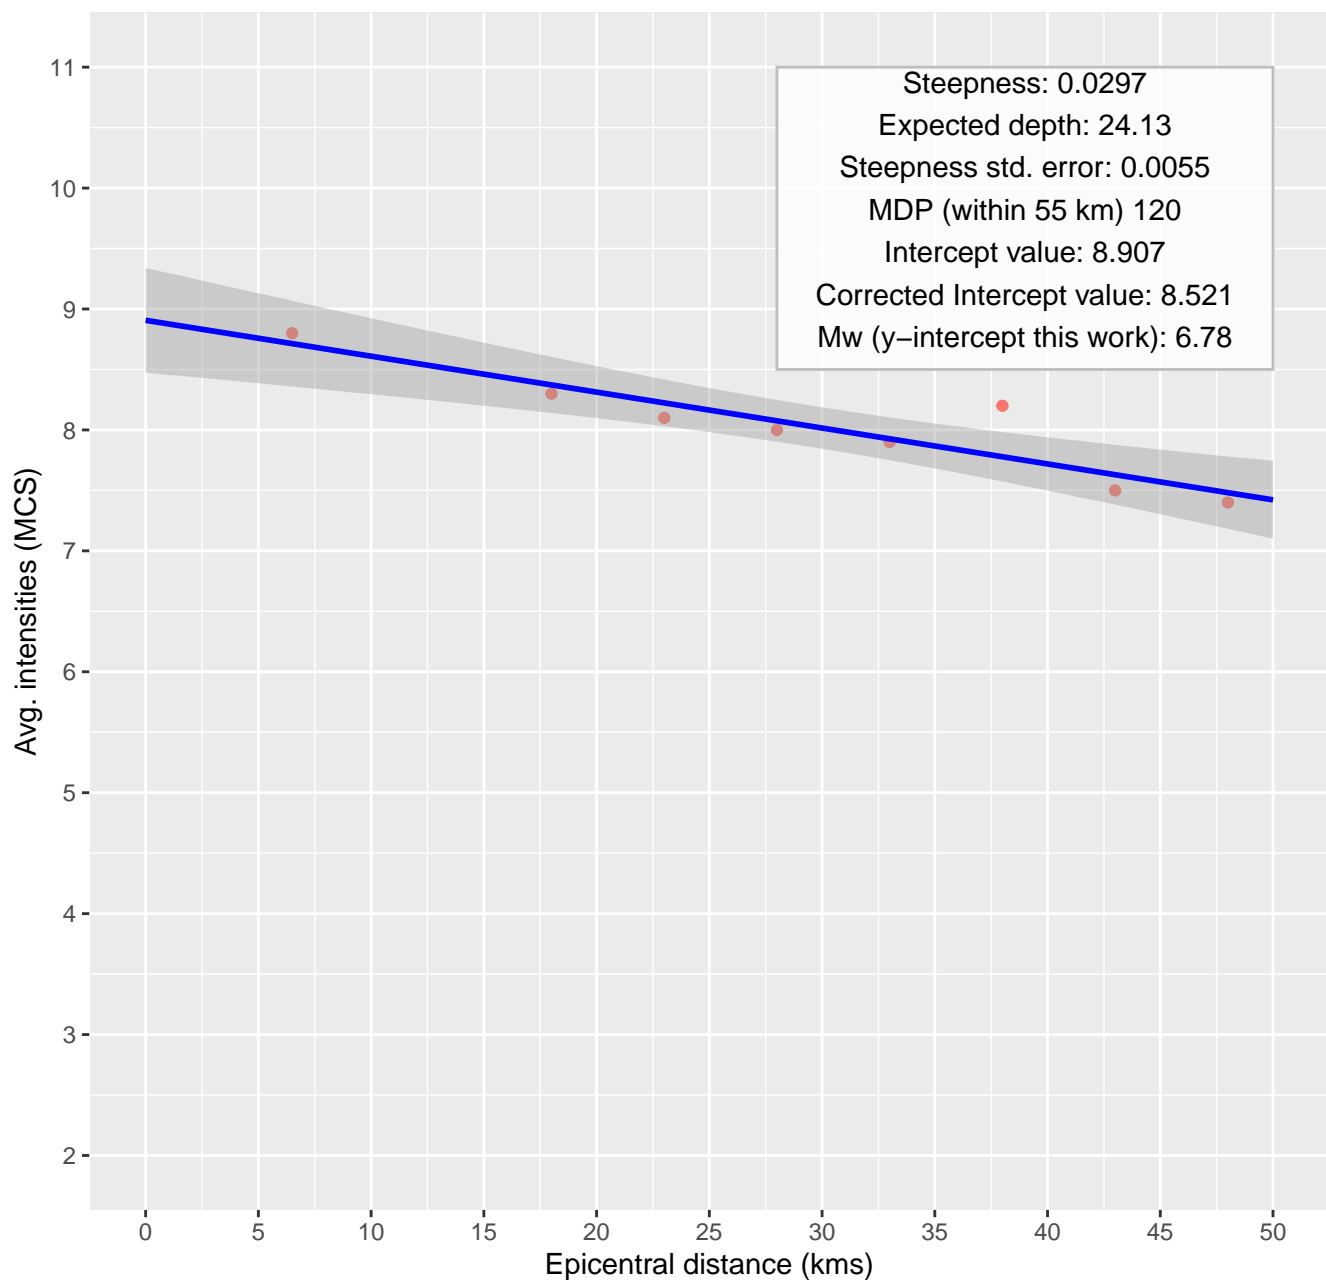

Supplement: Supplementary file 179 [file nhess-23-1007-2023-supplement.zip]

# DBMI\_ 18730629\_0358\_000 | 1873-06-29 – Alpago Cansiglio

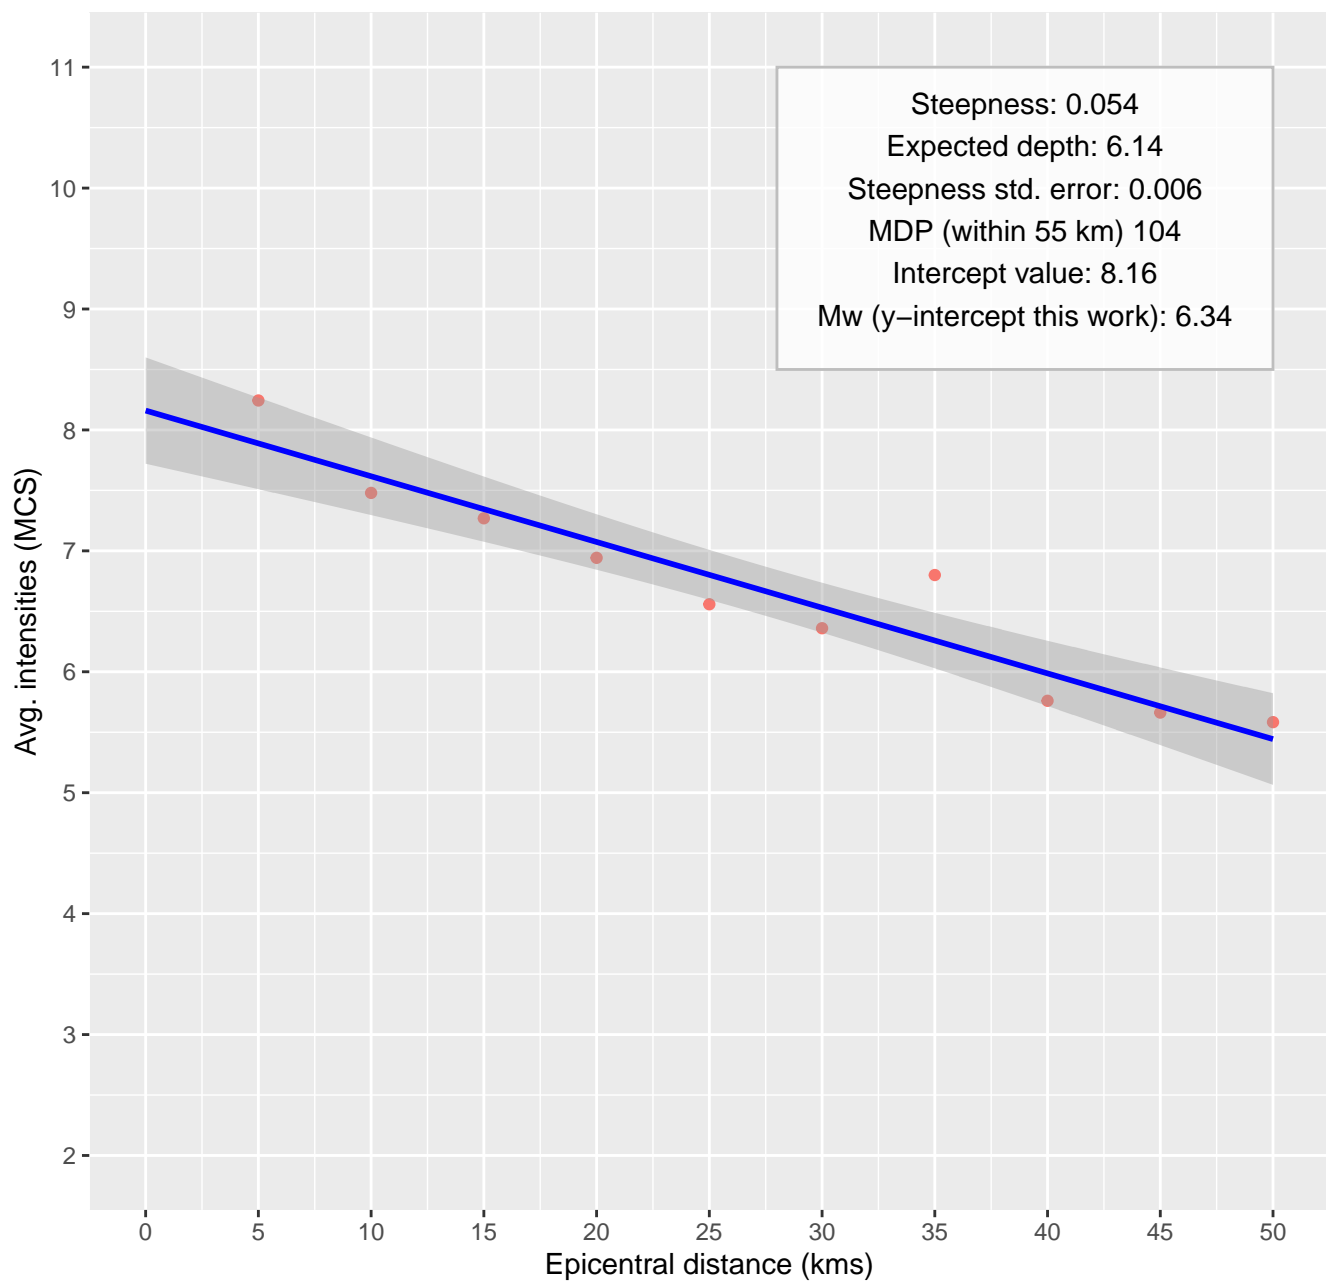

Supplement: Supplementary file 180 [file nhess-23-1007-2023-supplement.zip]

# DBMI\_ 18941116\_1752\_000 | 1894-11-16 – Calabria meridionale

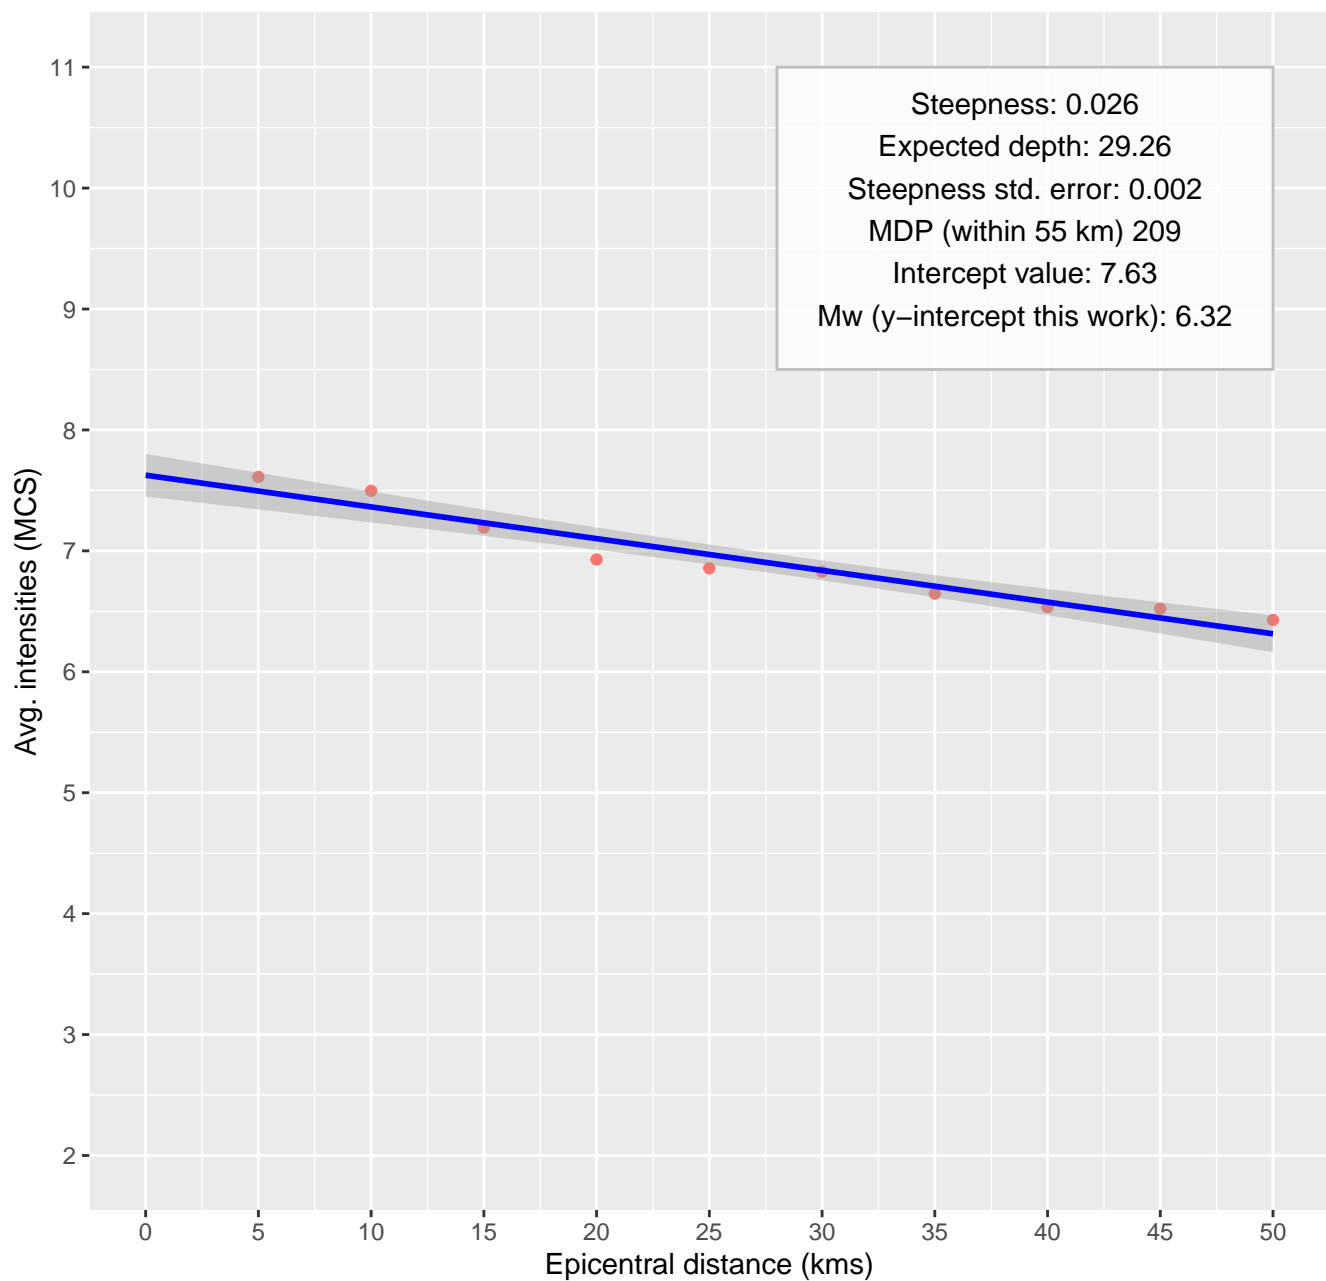

Supplement: Supplementary file 181 [file nhess-23-1007-2023-supplement.zip]

# DBMI\_ 18971218\_0724\_000 | 1897-12-18 – Alta Valtiberina

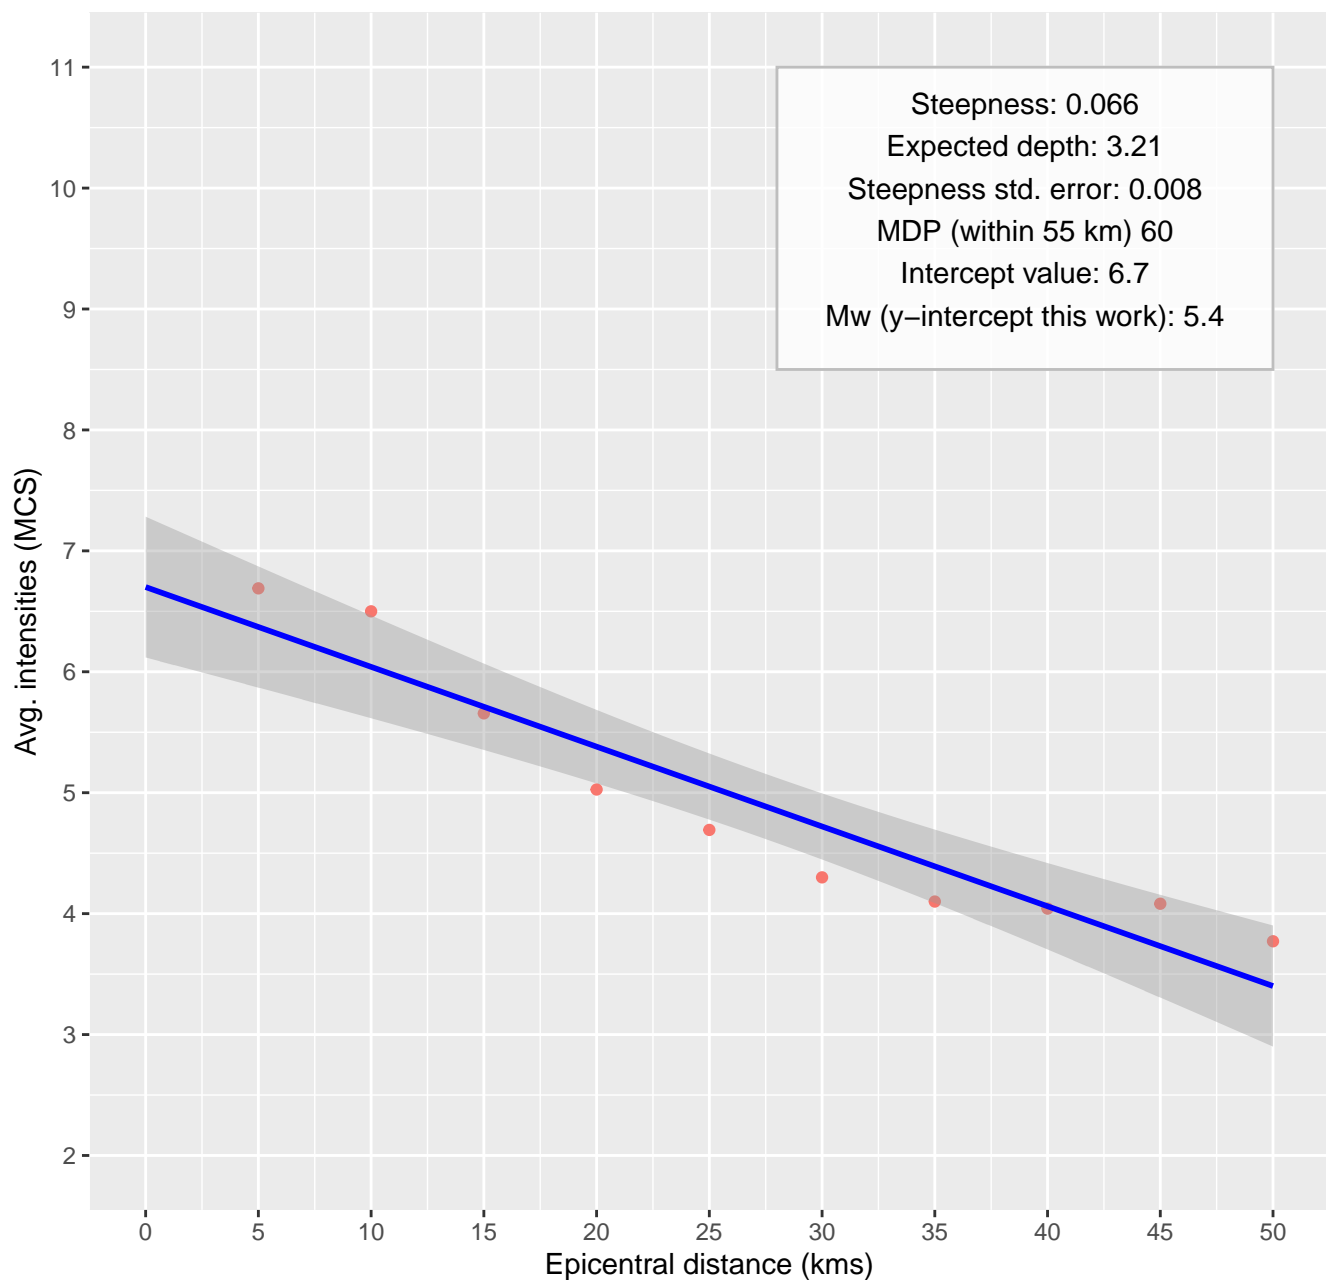

Supplement: Supplementary file 182 [file nhess-23-1007-2023-supplement.zip]

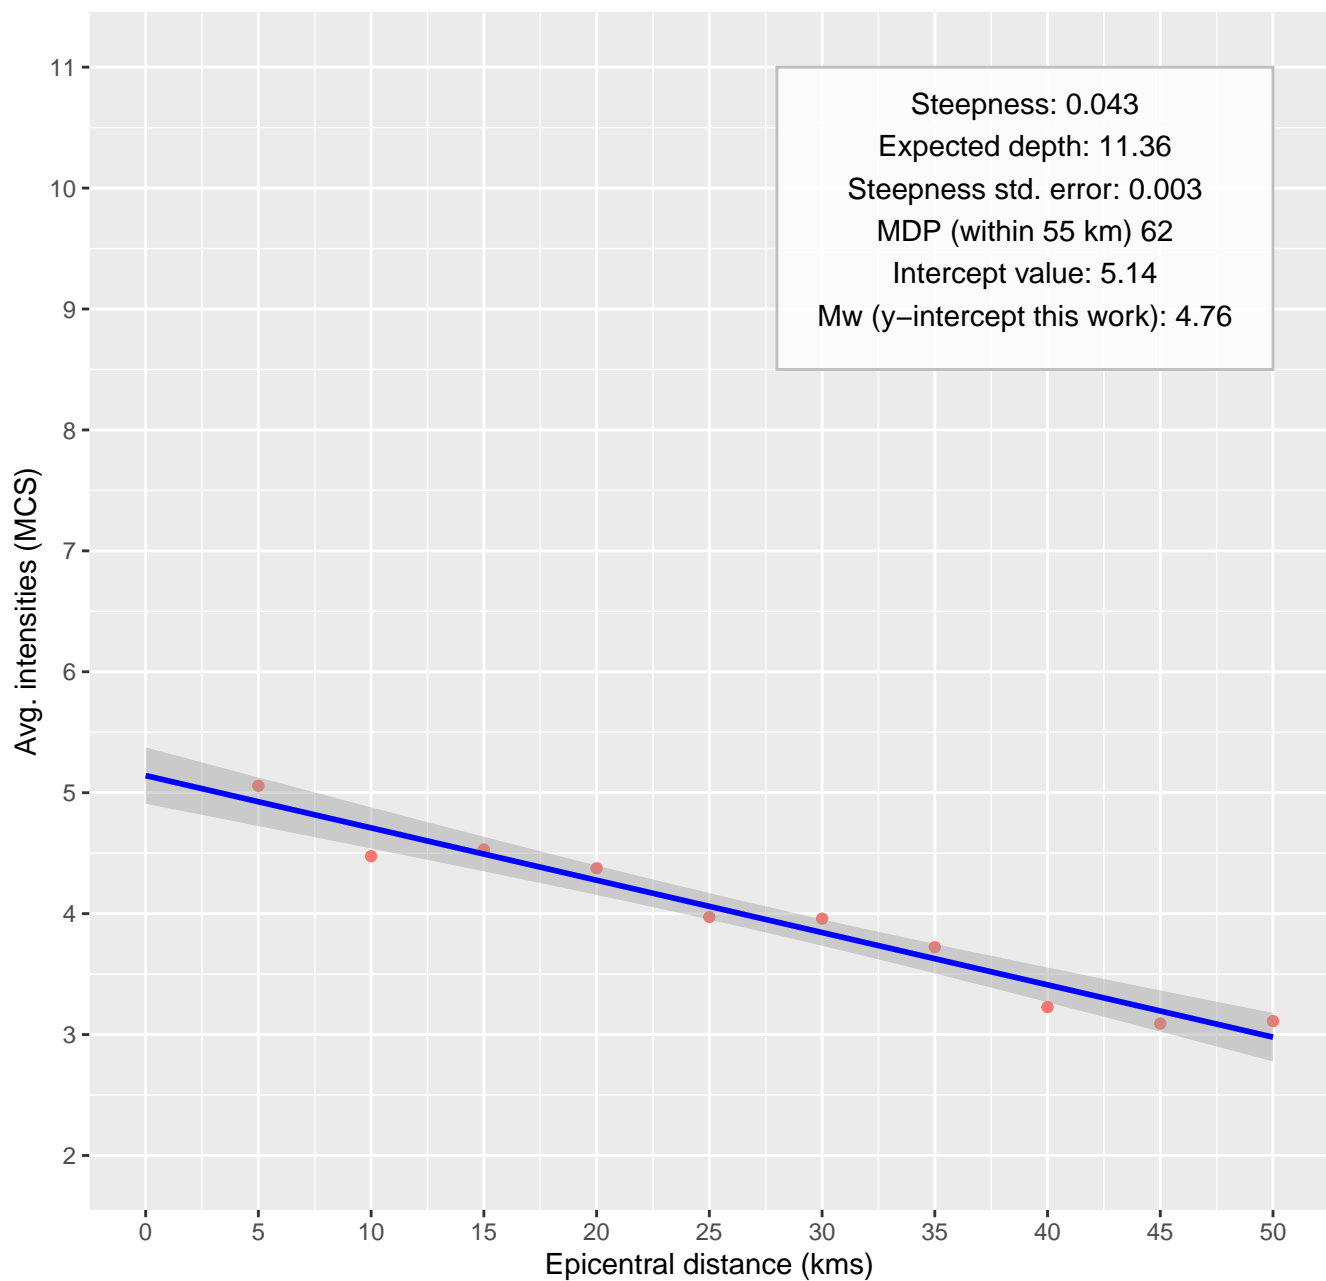

Supplement: Supplementary file 183 [file nhess-23-1007-2023-supplement.zip]

# DBMI\_ 18920305\_0000\_000 | 1892-03-05 – Valle d'Aosta

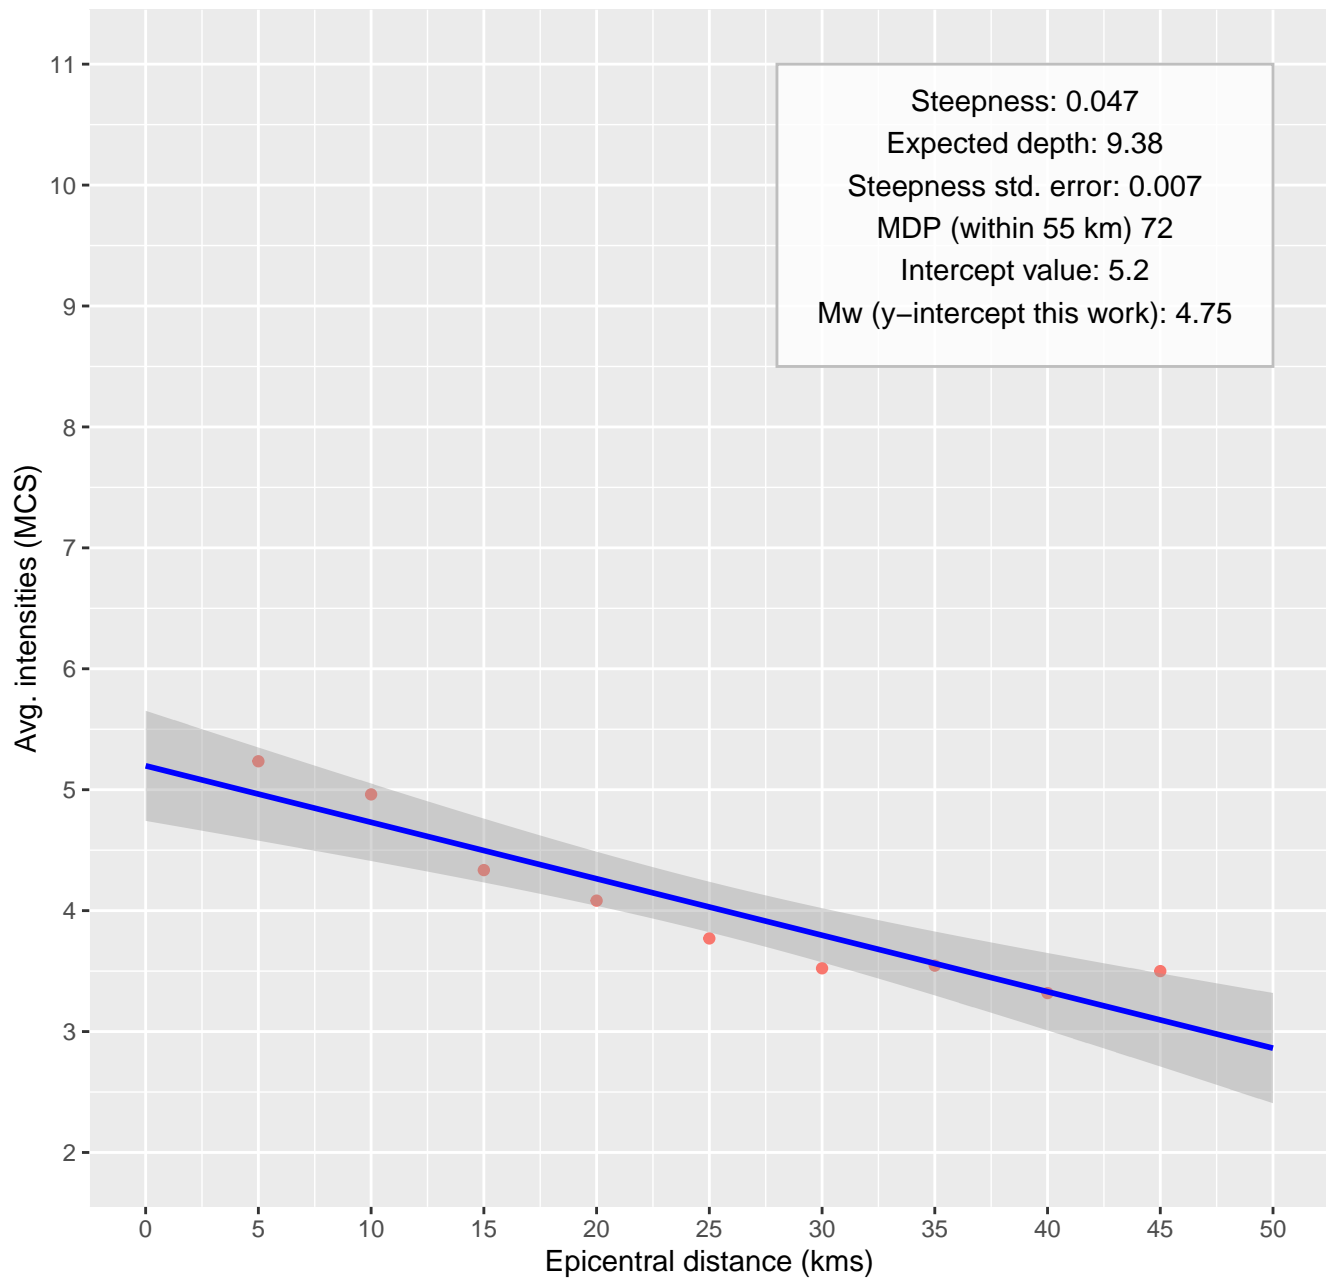

Supplement: Supplementary file 184 [file nhess-23-1007-2023-supplement.zip]

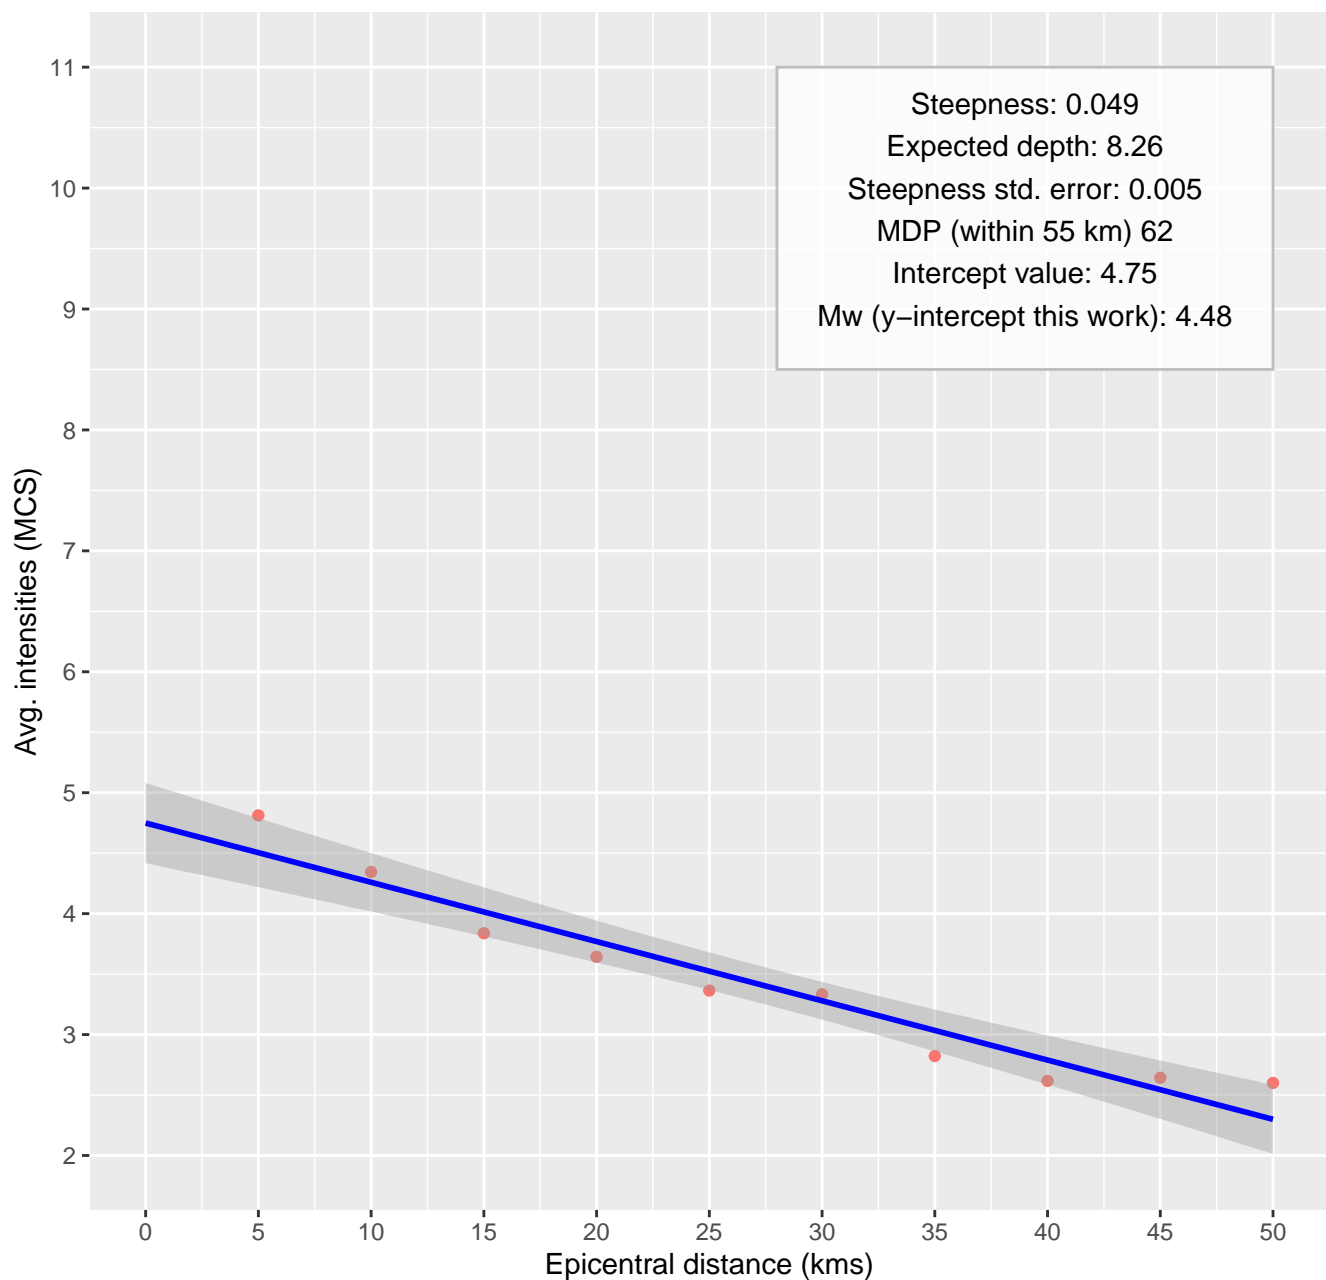

Supplement: Supplementary file 185 [file nhess-23-1007-2023-supplement.zip]

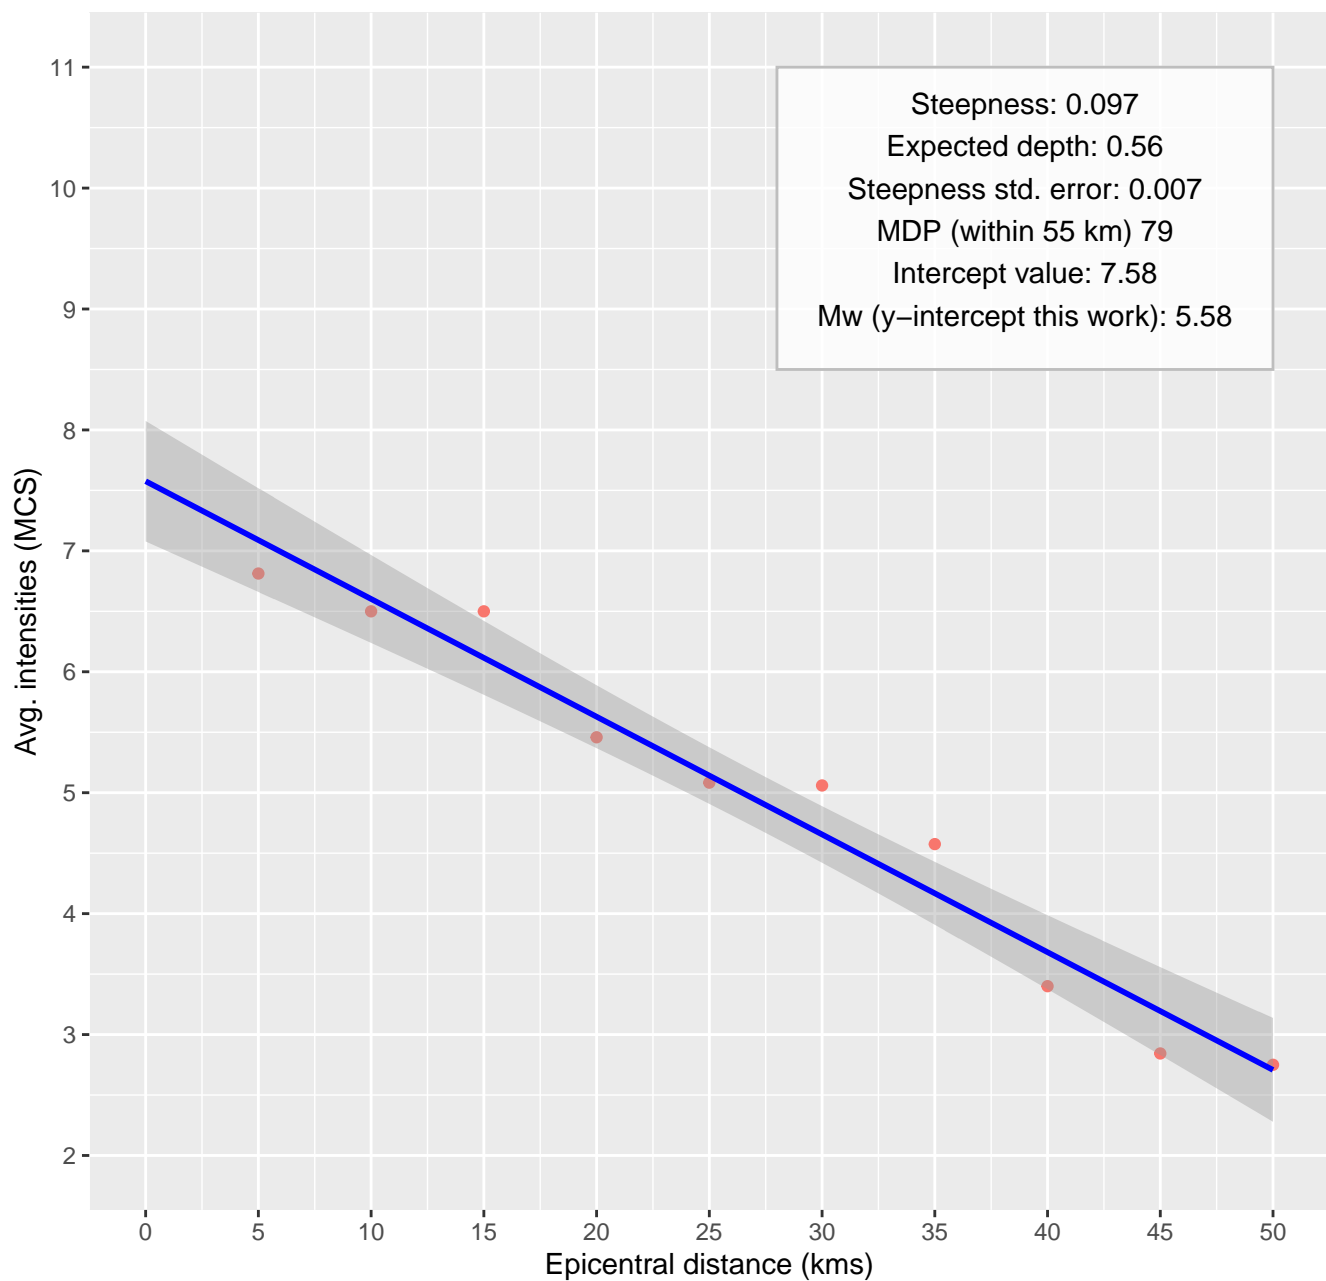

Supplement: Supplementary file 186 [file nhess-23-1007-2023-supplement.zip]

# DBMI\_ 17830207\_1310\_000 | 1783-02-07 – Calabria centrale

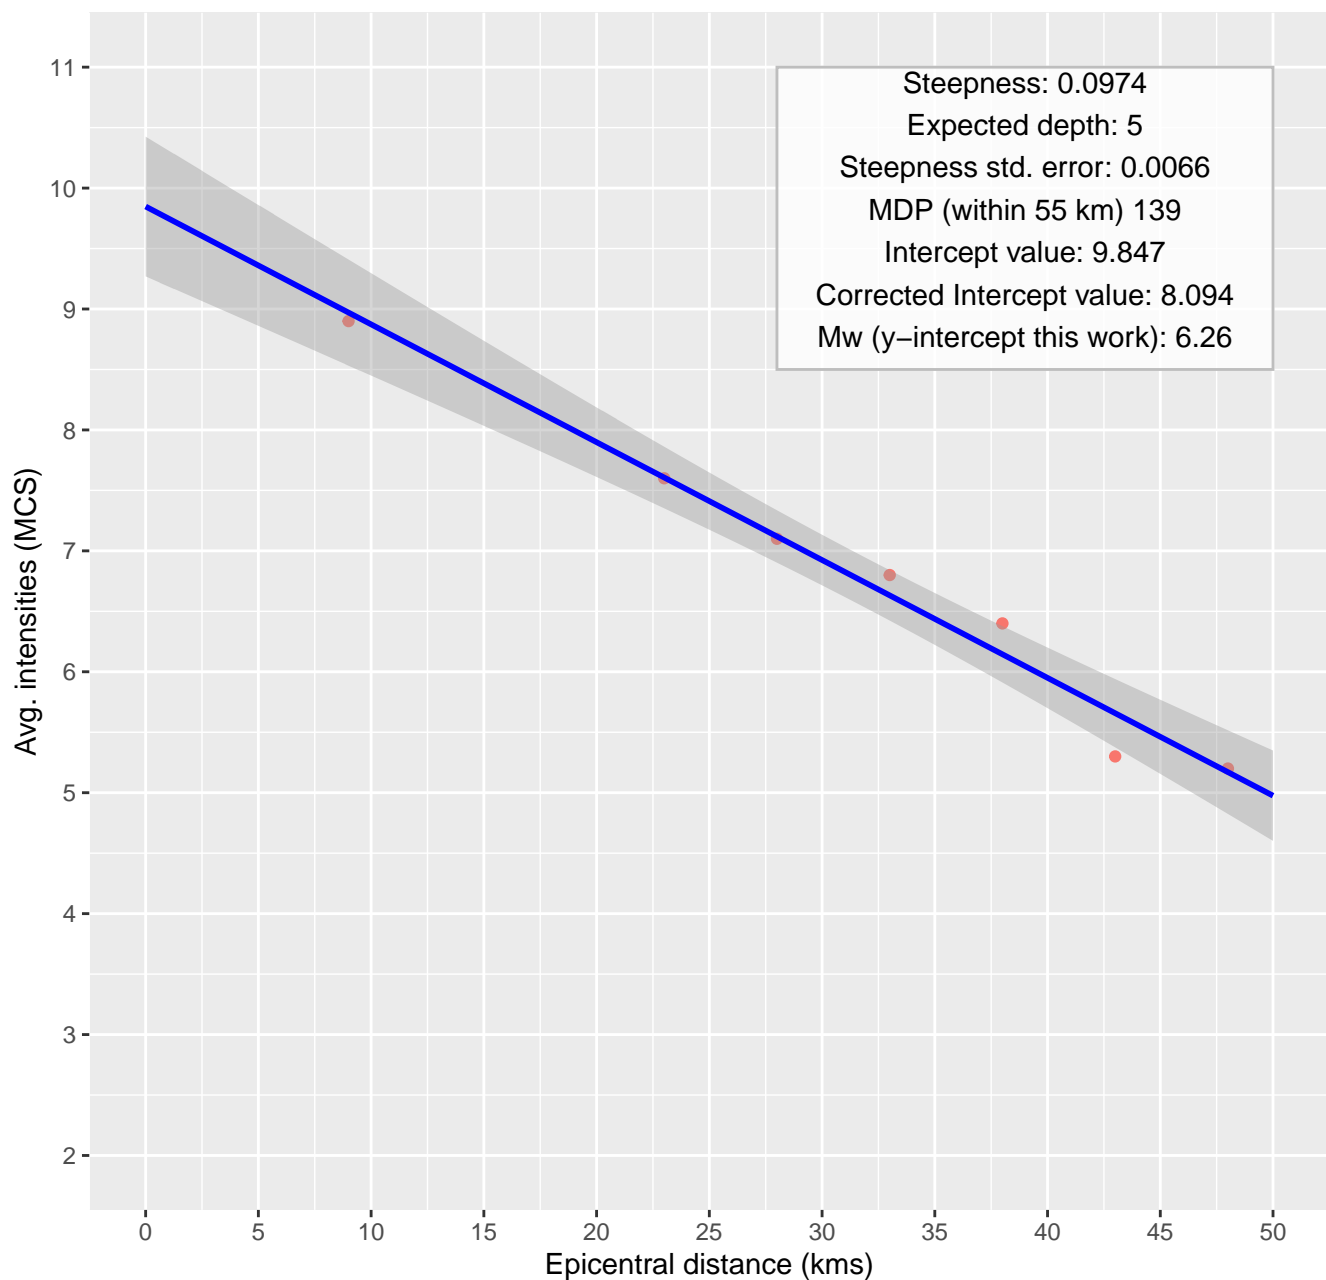

Supplement: Supplementary file 187 [file nhess-23-1007-2023-supplement.zip]

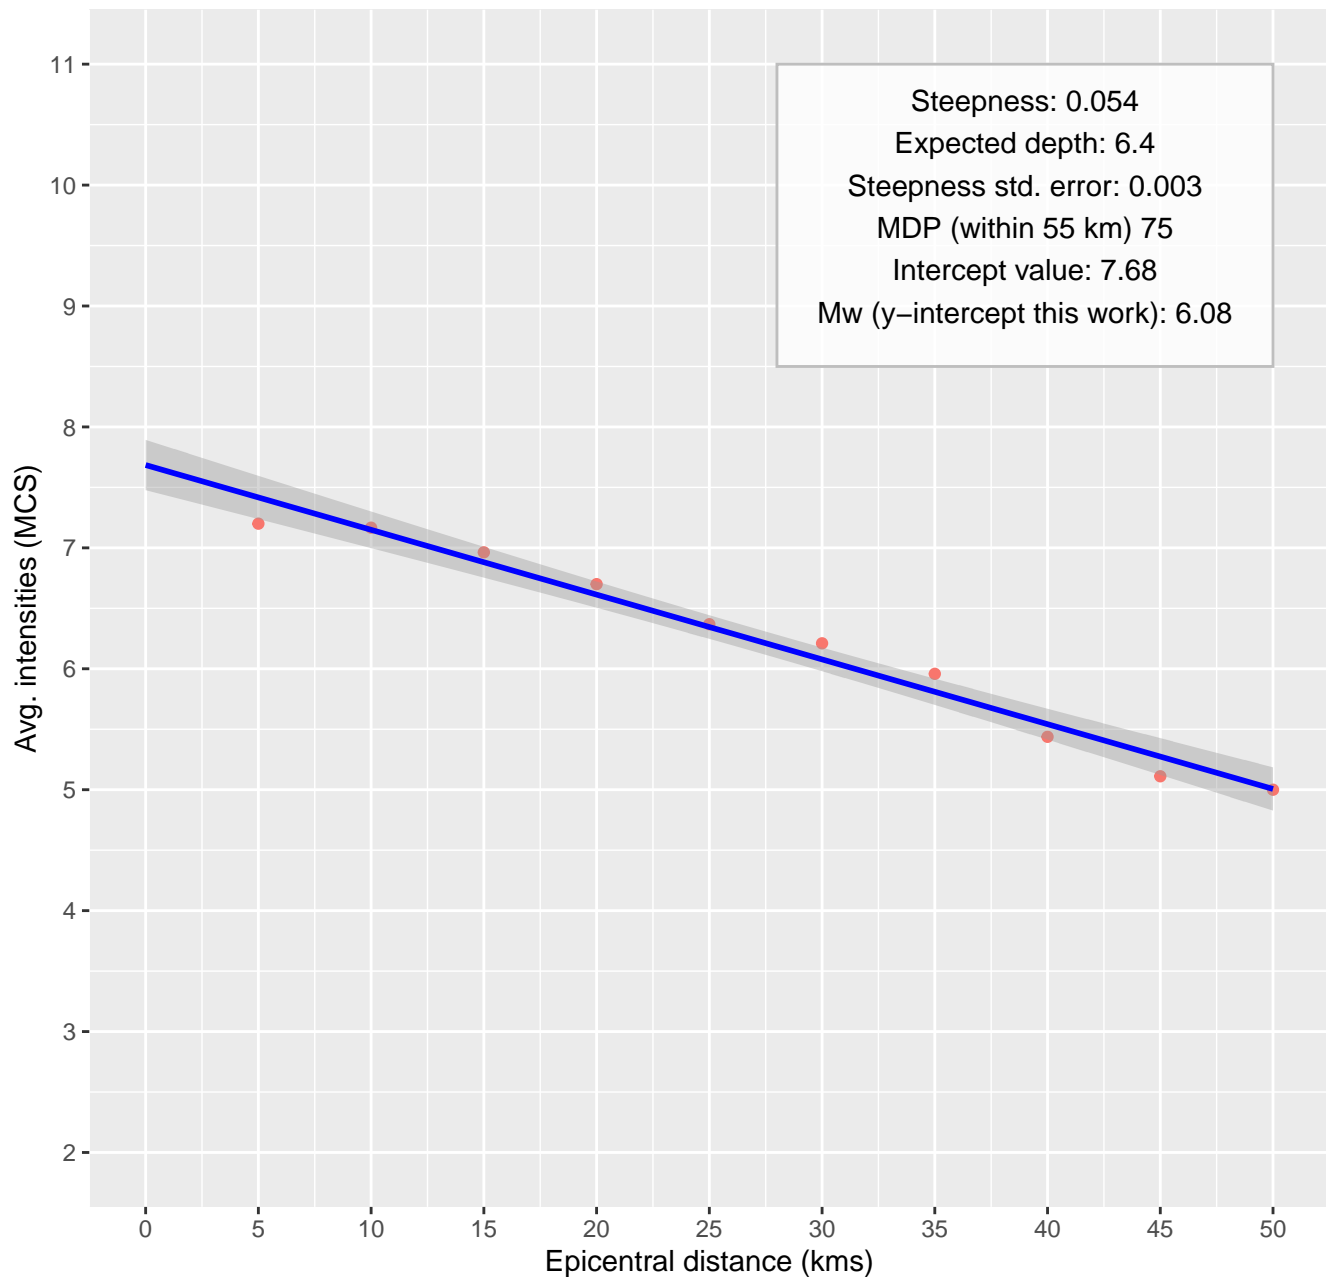

Supplement: Supplementary file 188 [file nhess-23-1007-2023-supplement.zip]

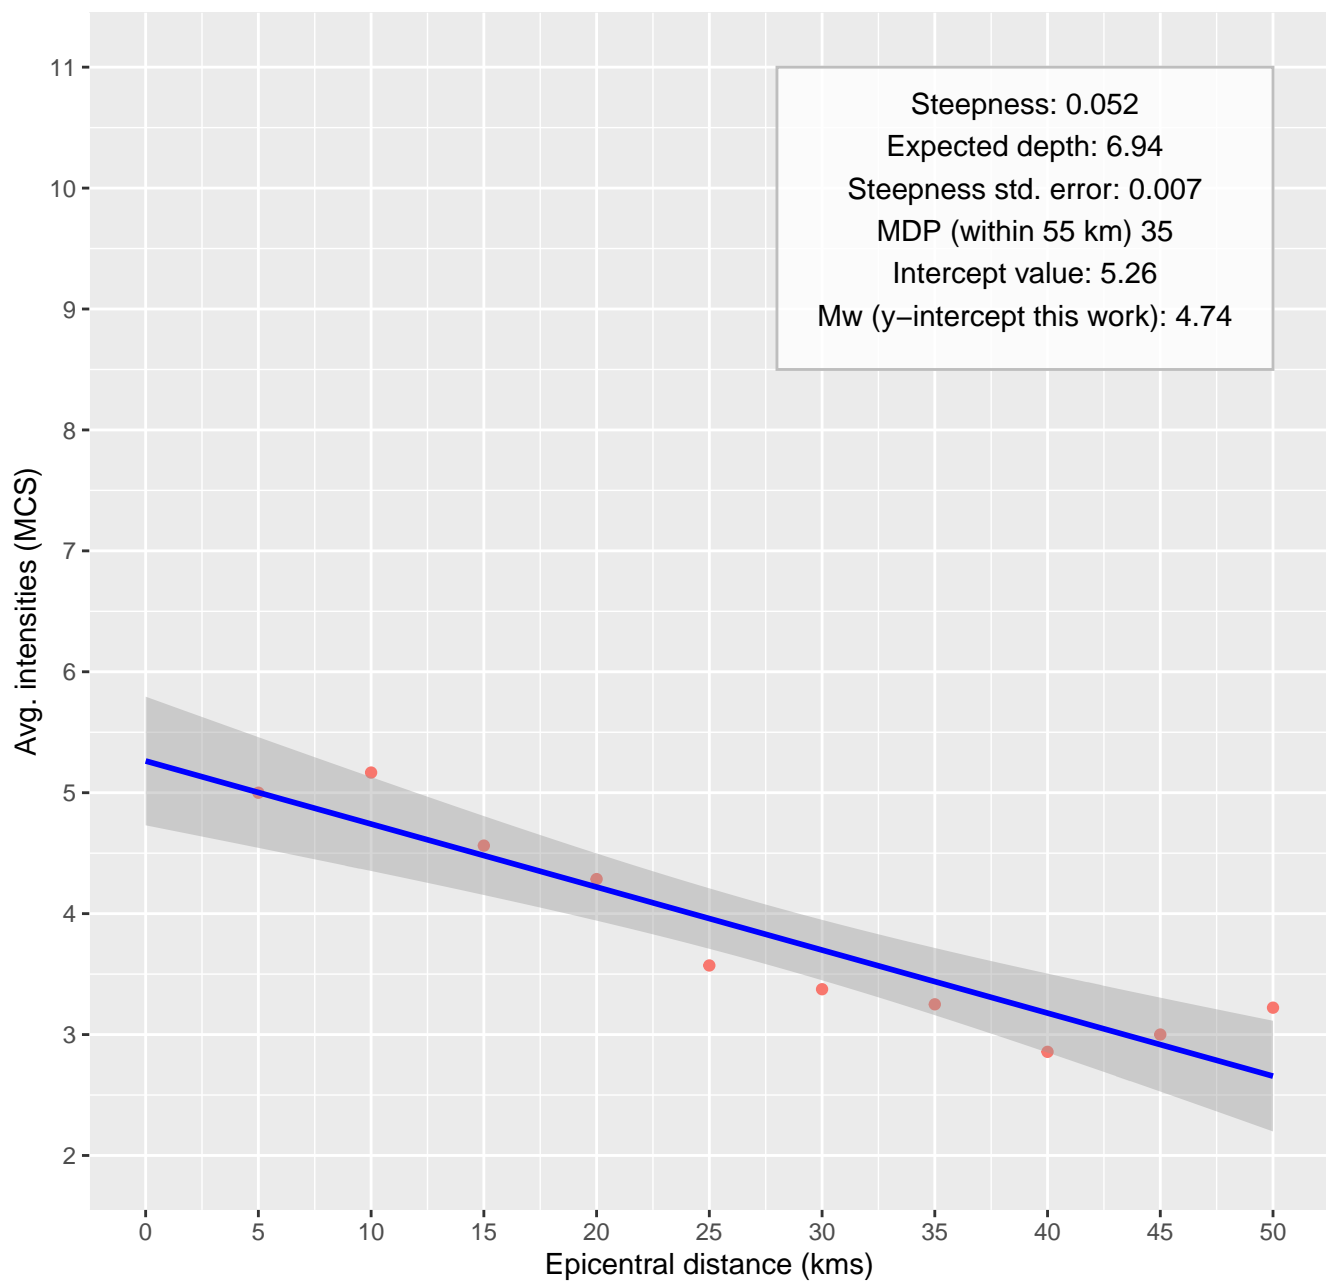

Supplement: Supplementary file 189 [file nhess-23-1007-2023-supplement.zip]

# DBMI\_ 19110219\_0718\_000 | 1911-02-19 – Forlivese

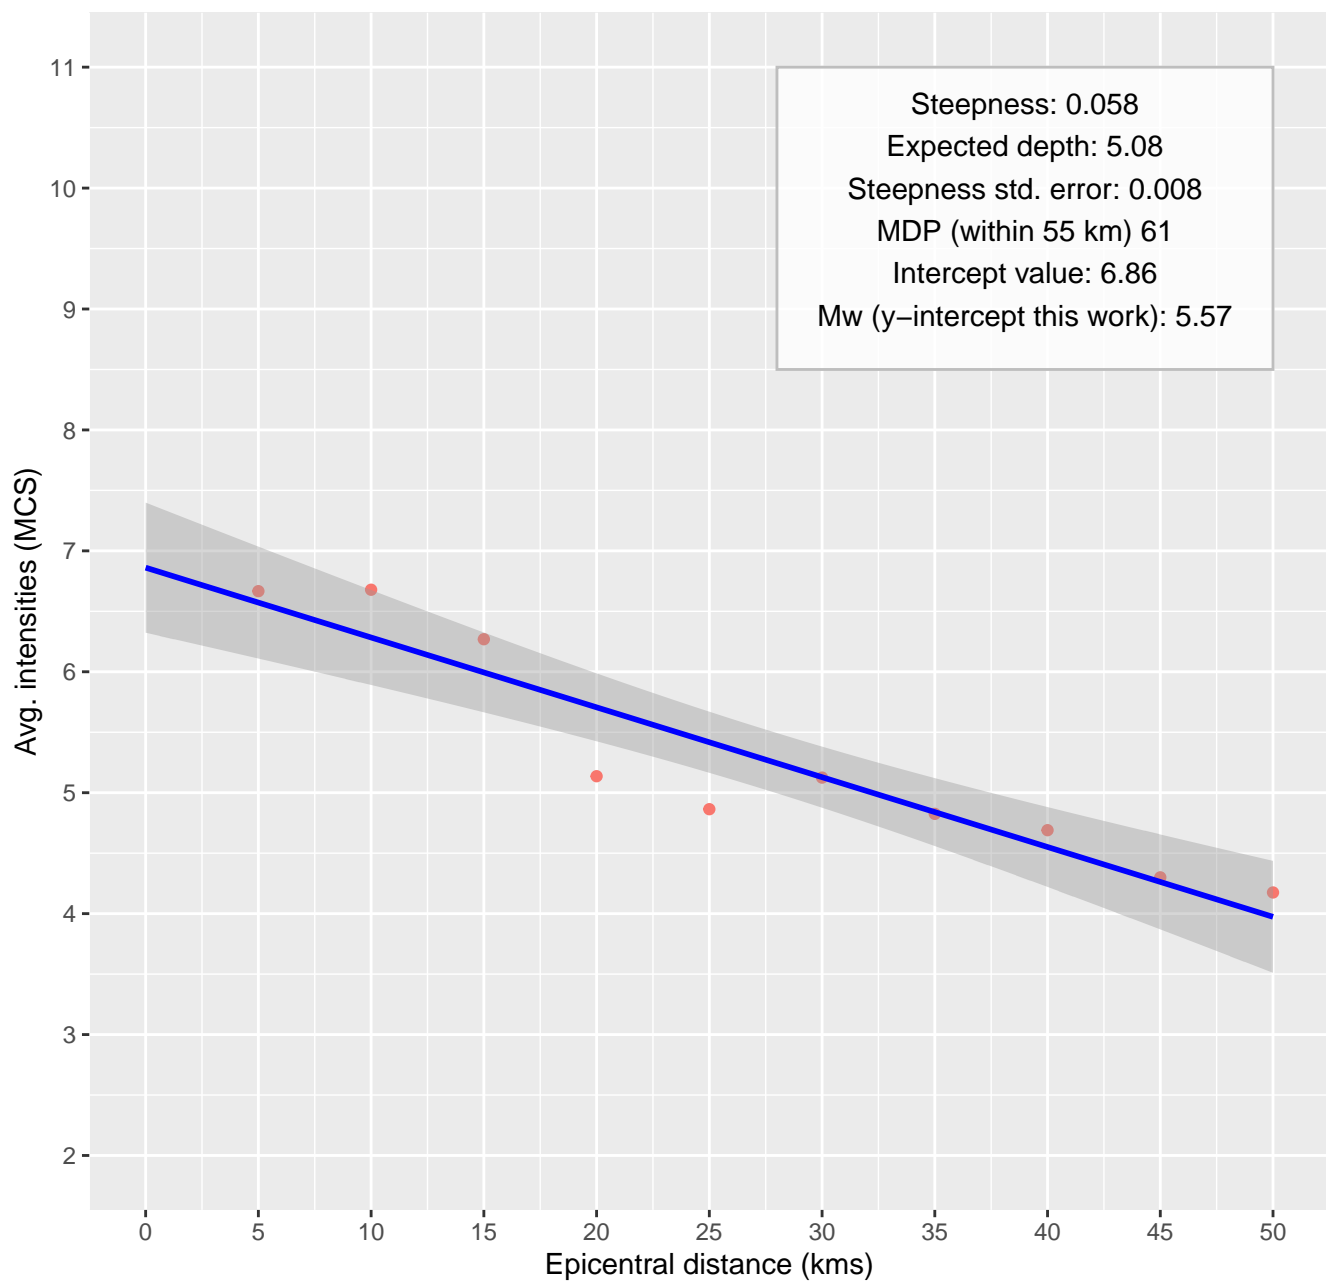

Supplement: Supplementary file 190 [file nhess-23-1007-2023-supplement.zip]

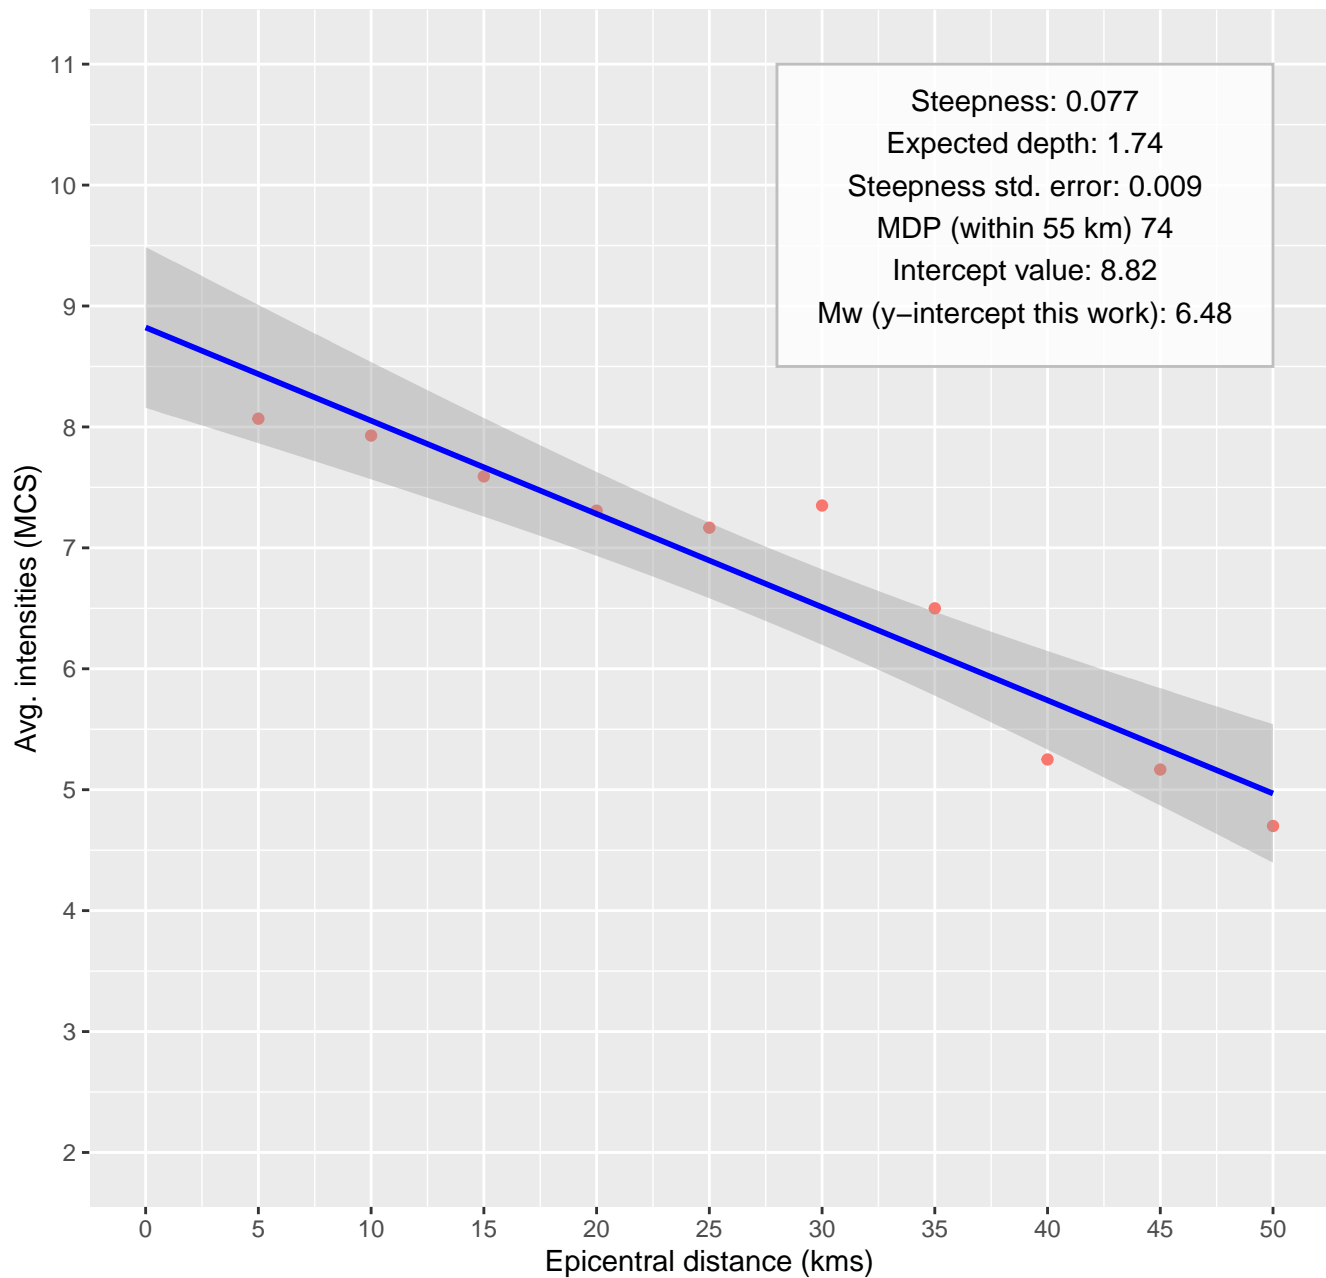

Supplement: Supplementary file 191 [file nhess-23-1007-2023-supplement.zip]

# DBMI\_ 17911013\_0120\_000 | 1791-10-13 – Calabria centrale

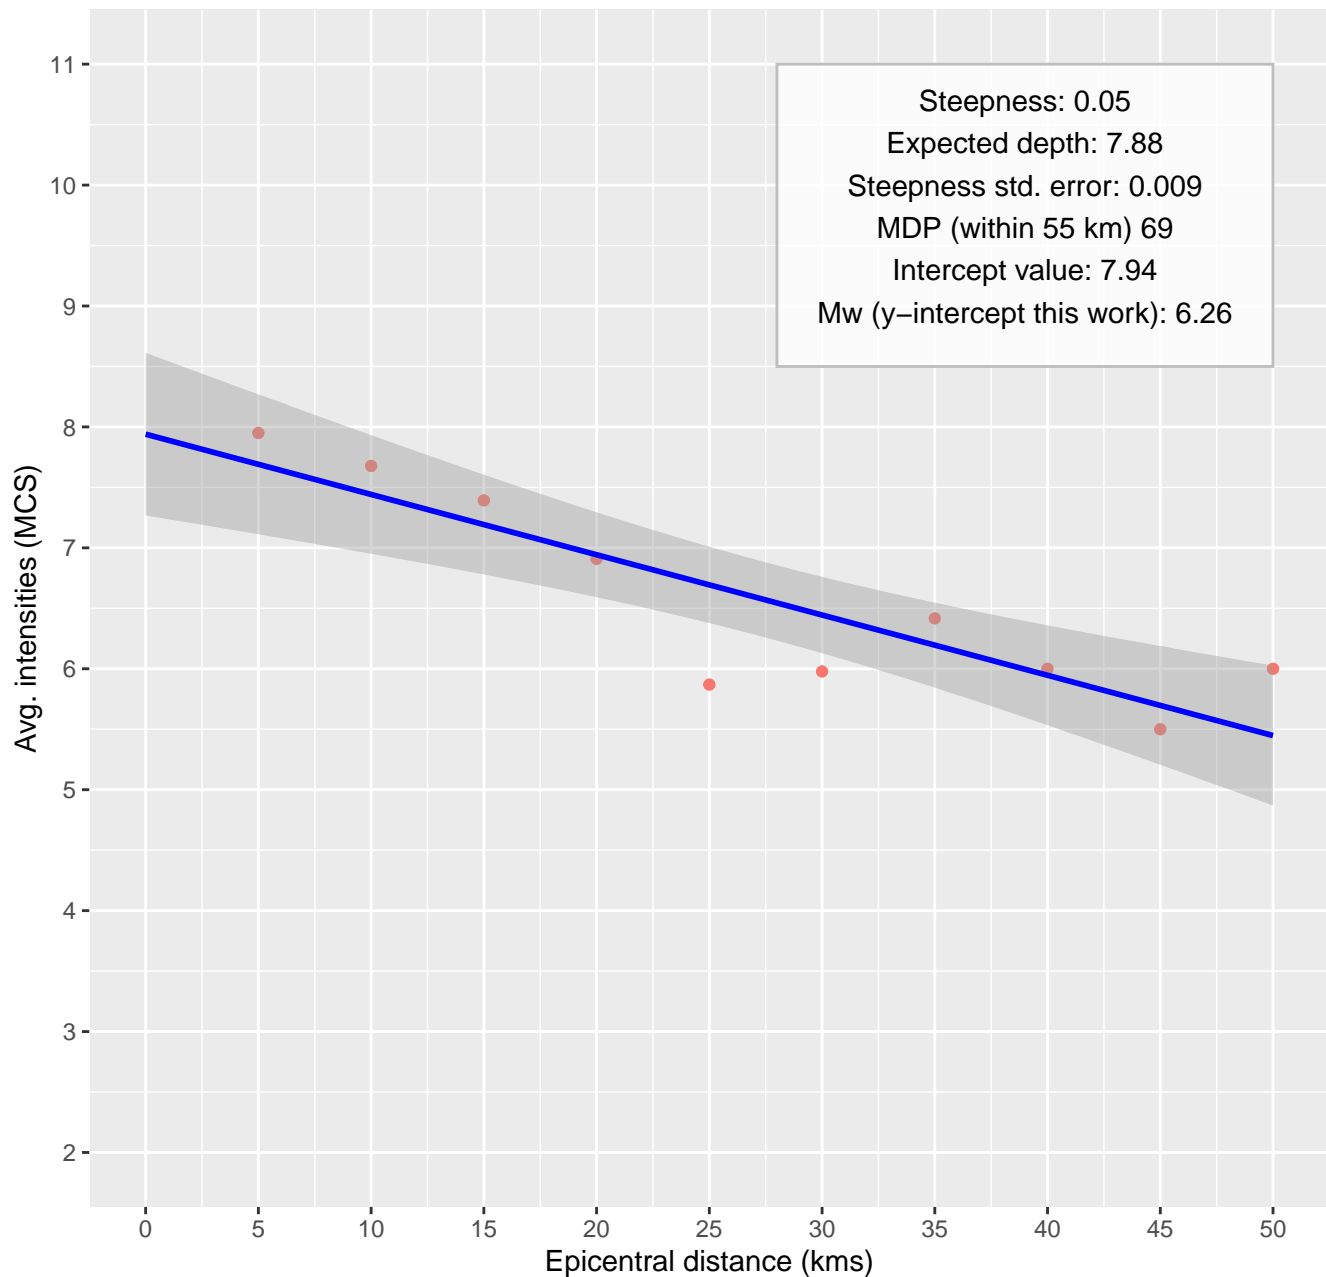

Supplement: Supplementary file 193 [file nhess-23-1007-2023-supplement.zip]

# DBMI\_ 19220608\_0747\_000 | 1922-06-08 – Valle del Chienti

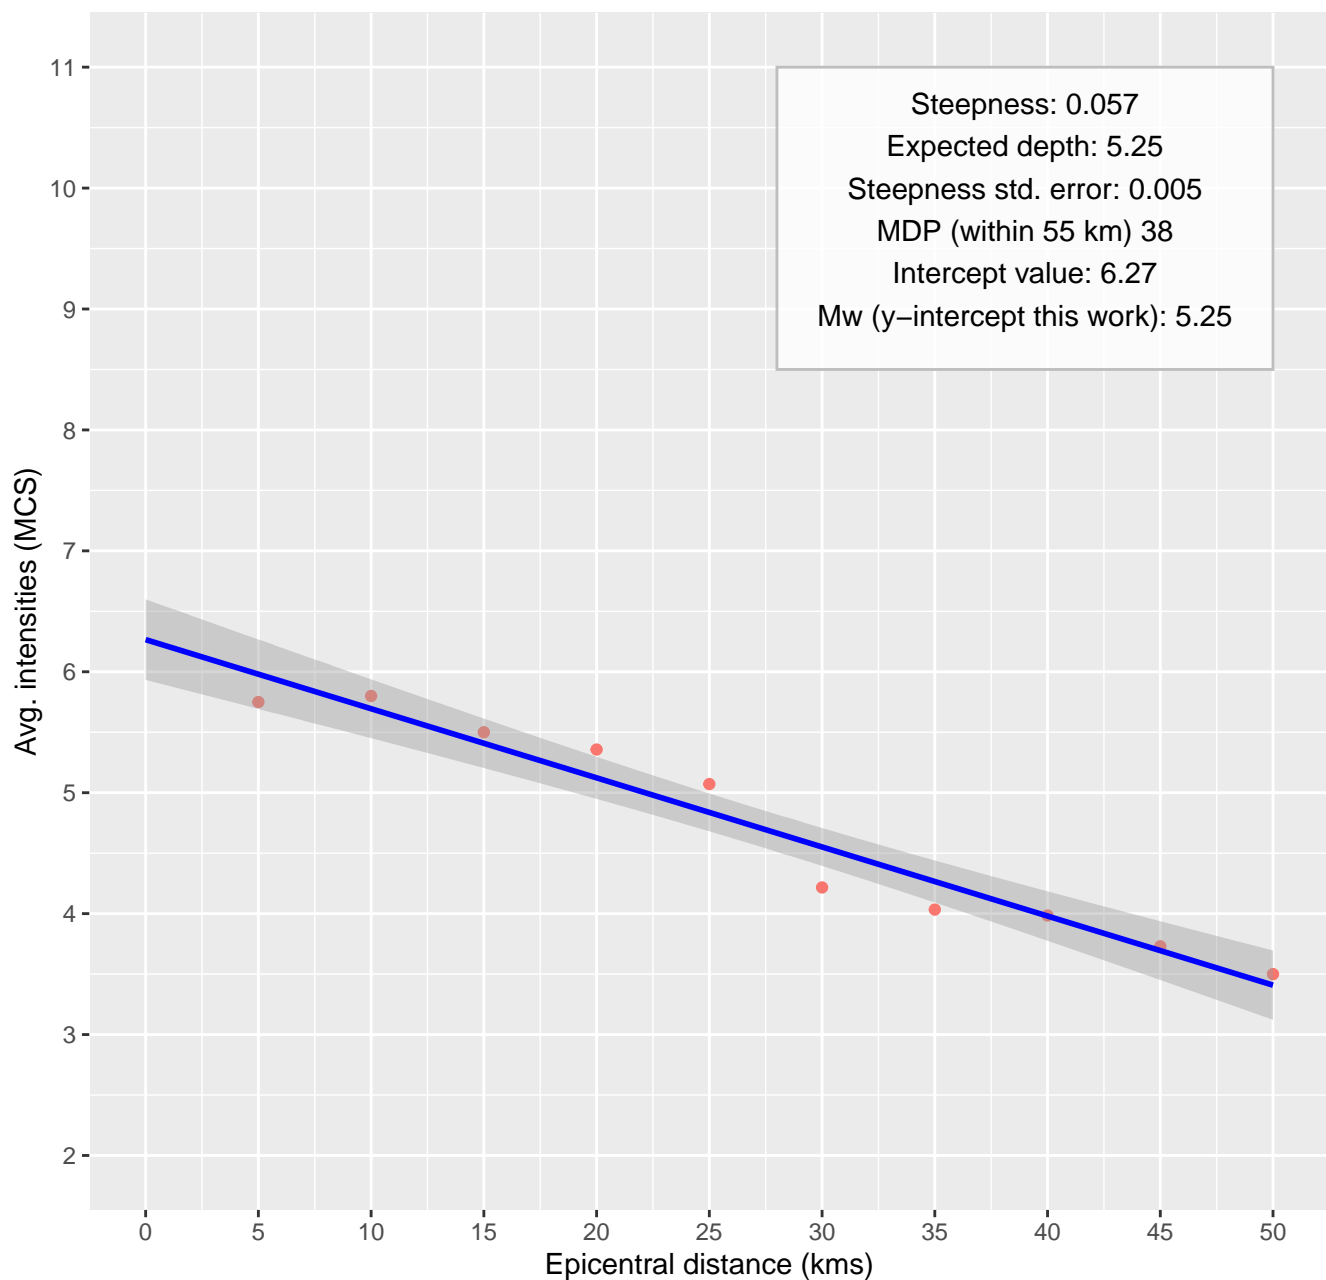

Supplement: Supplementary file 194 [file nhess-23-1007-2023-supplement.zip]

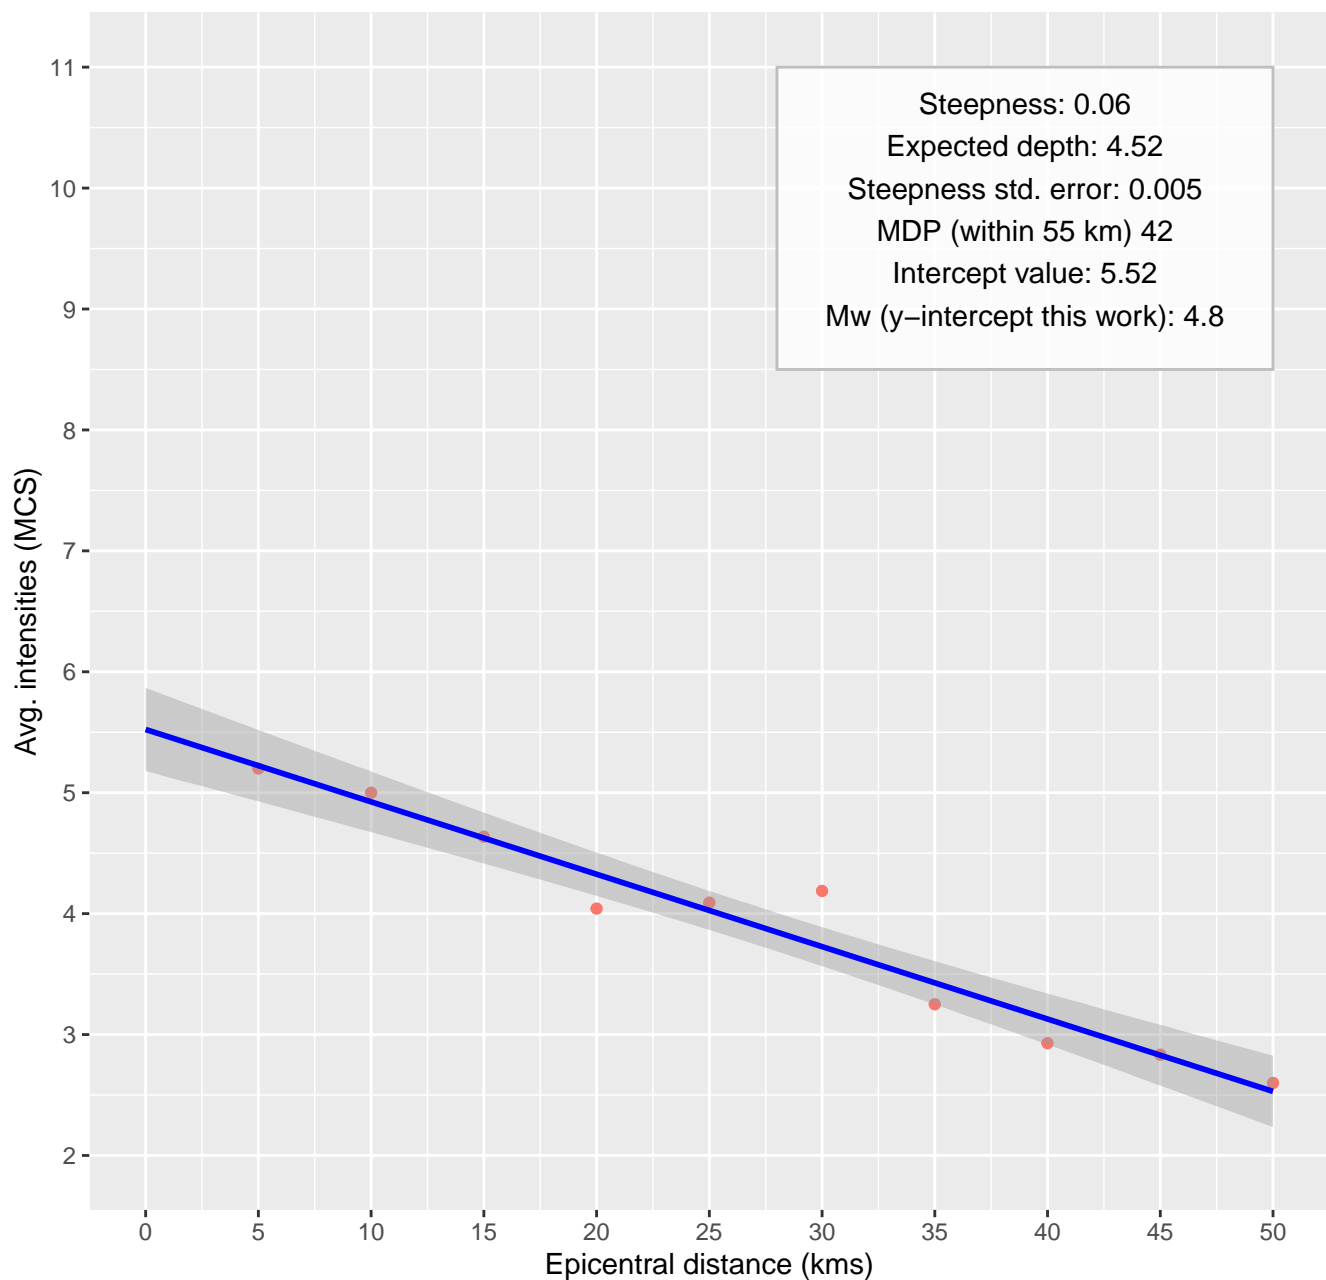

Supplement: Supplementary file 195 [file nhess-23-1007-2023-supplement.zip]

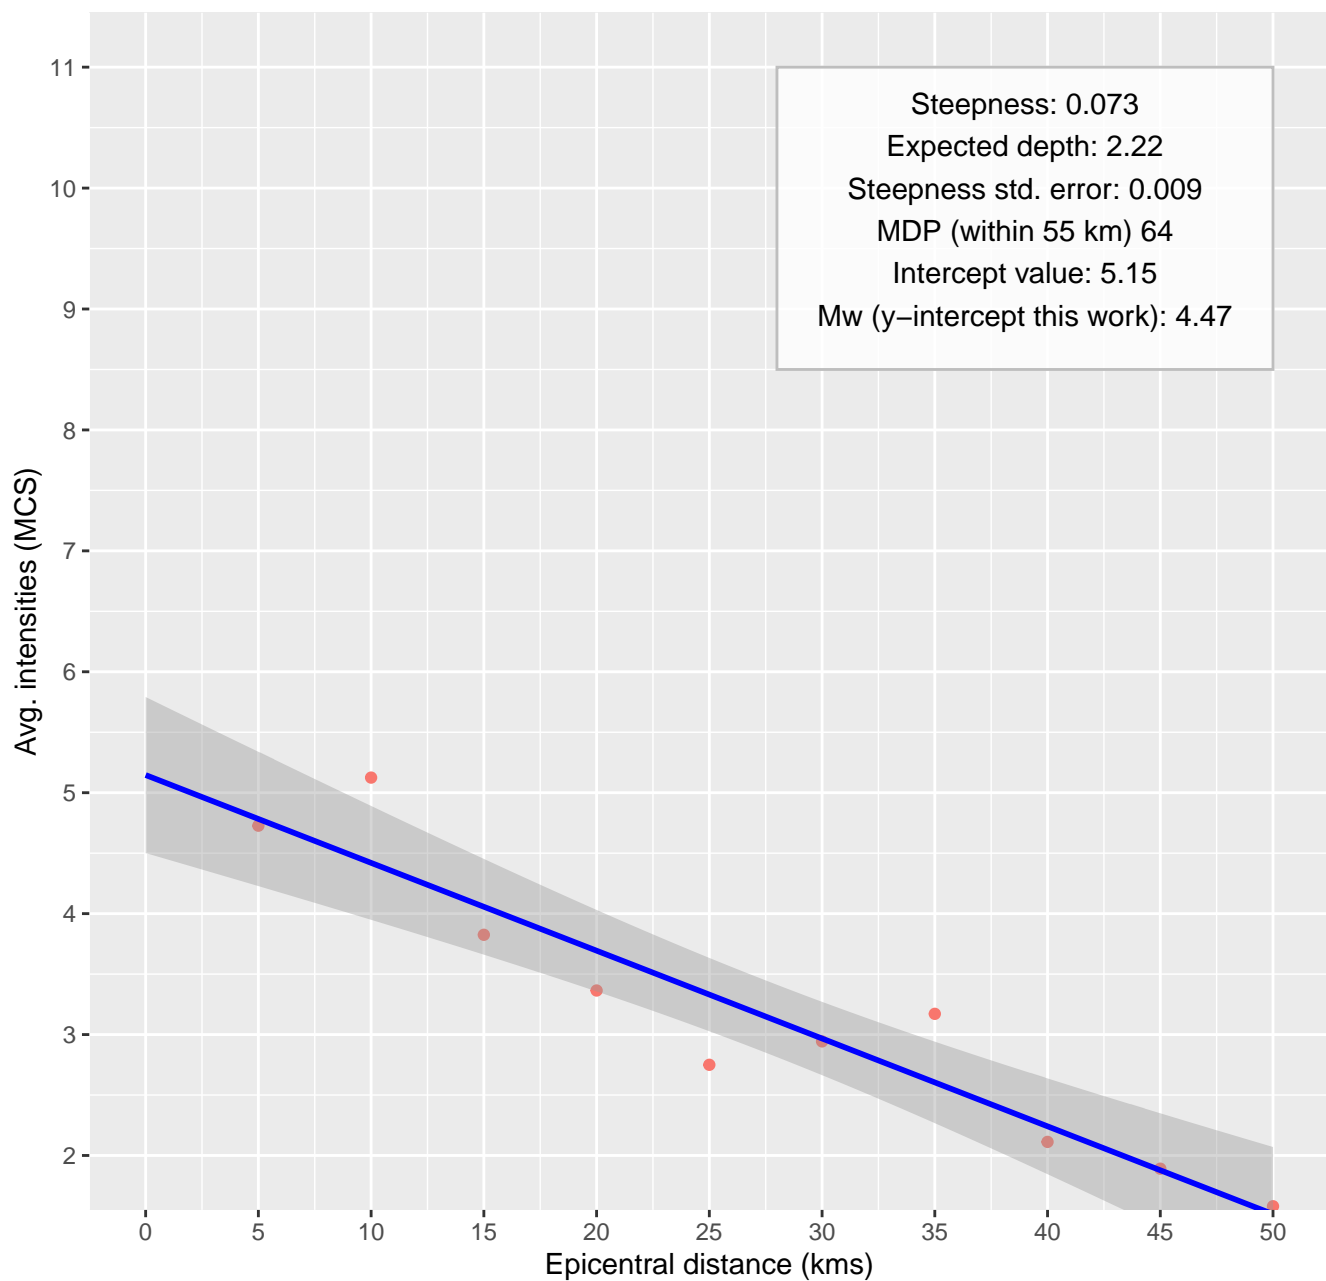

Supplement: Supplementary file 196 [file nhess-23-1007-2023-supplement.zip]

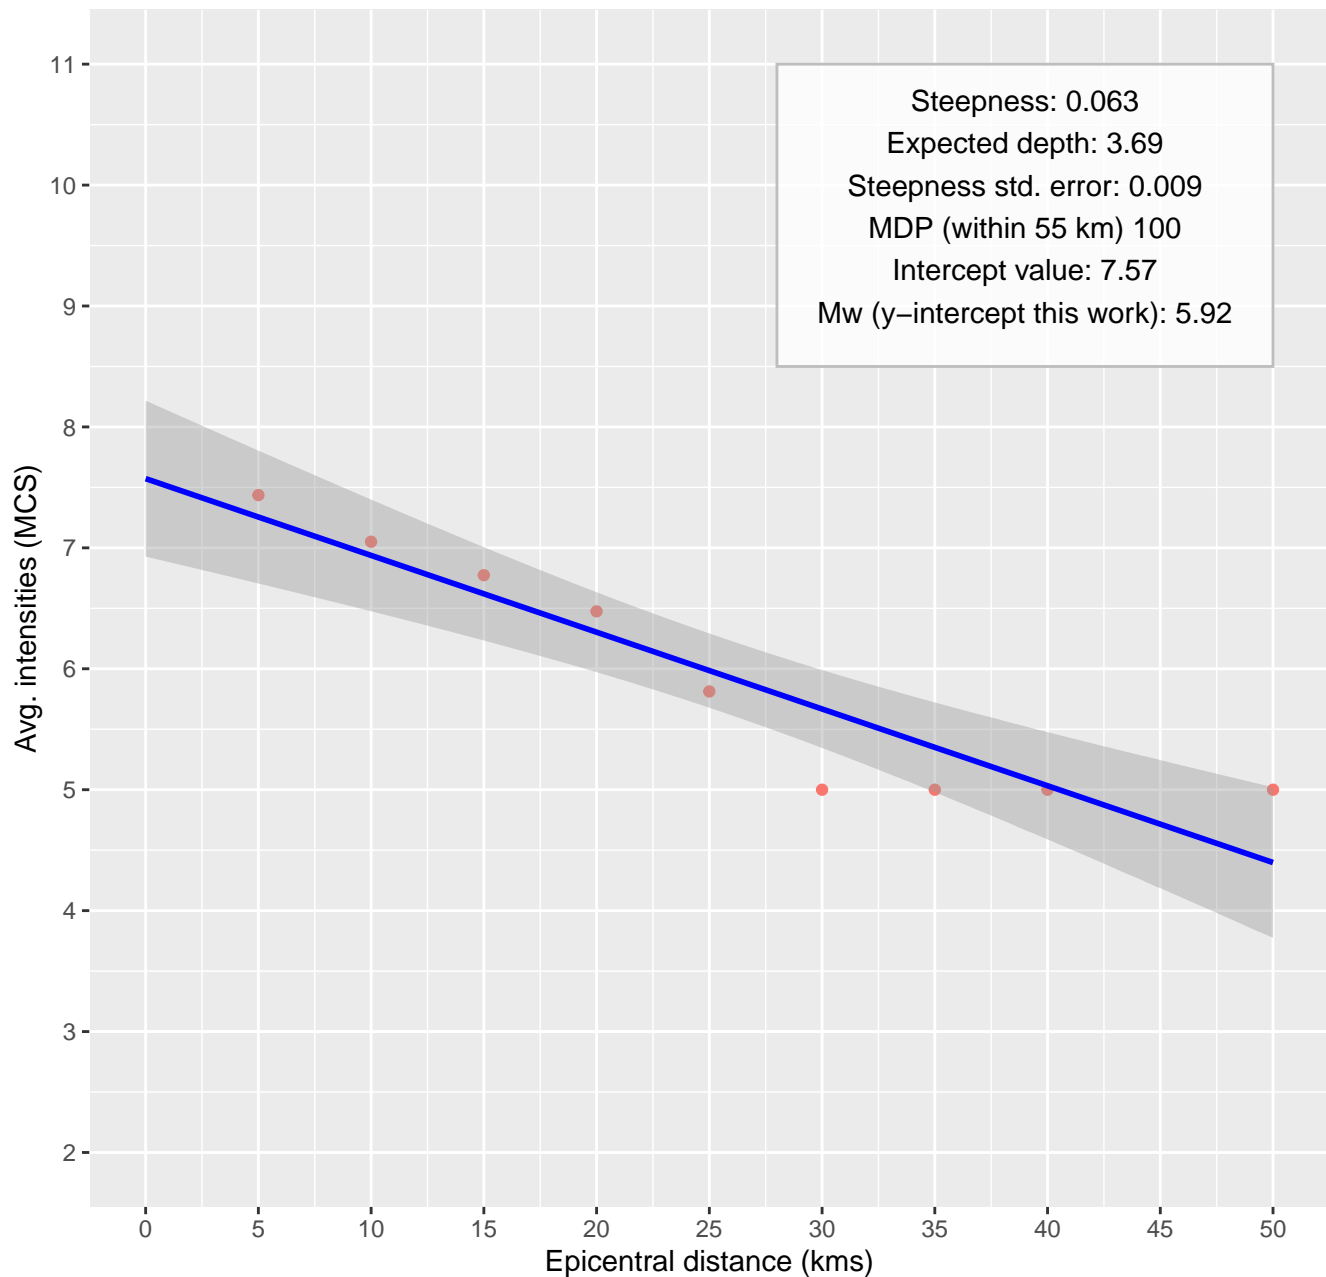

Supplement: Supplementary file 197 [file nhess-23-1007-2023-supplement.zip]

# DBMI\_ 18281009\_0220\_000 | 1828-10-09 – Oltrepò Pavese

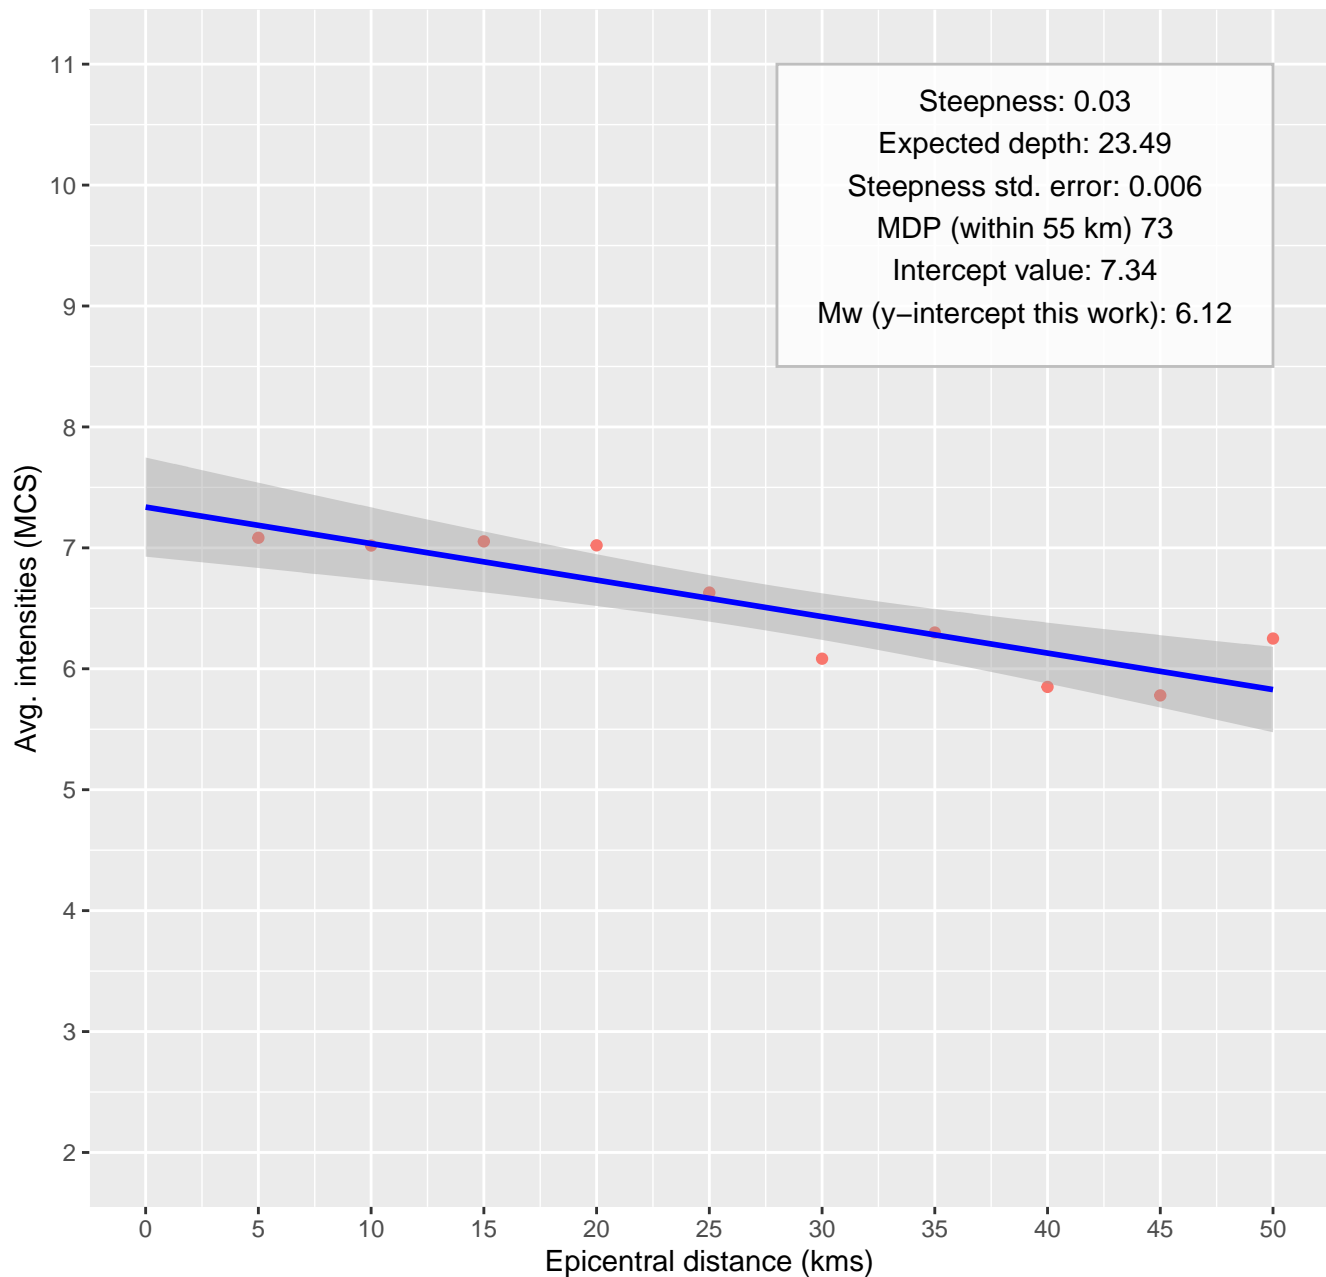

Supplement: Supplementary file 198 [file nhess-23-1007-2023-supplement.zip]

# DBMI\_ 19110410\_0943\_000 | 1911-04-10 – Colli Albani

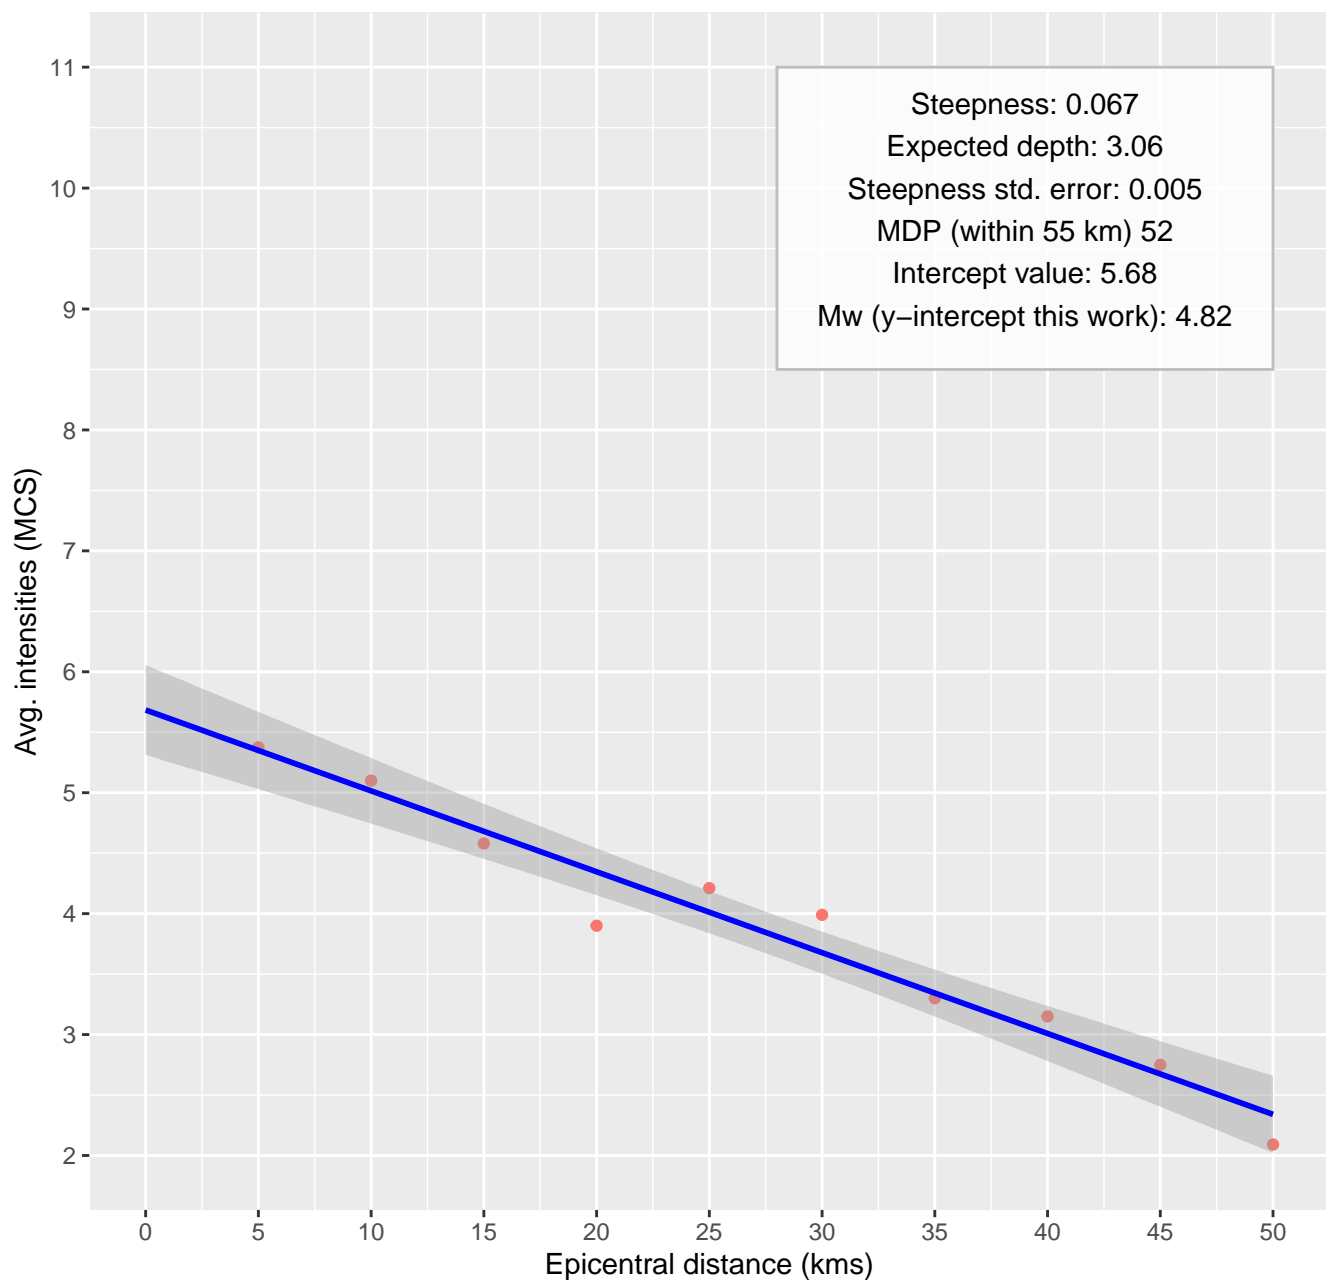

Supplement: Supplementary file 199 [file nhess-23-1007-2023-supplement.zip]

# DBMI\_ 19830210\_2230\_000 | 1983-02-10 – Prealpi Giulie

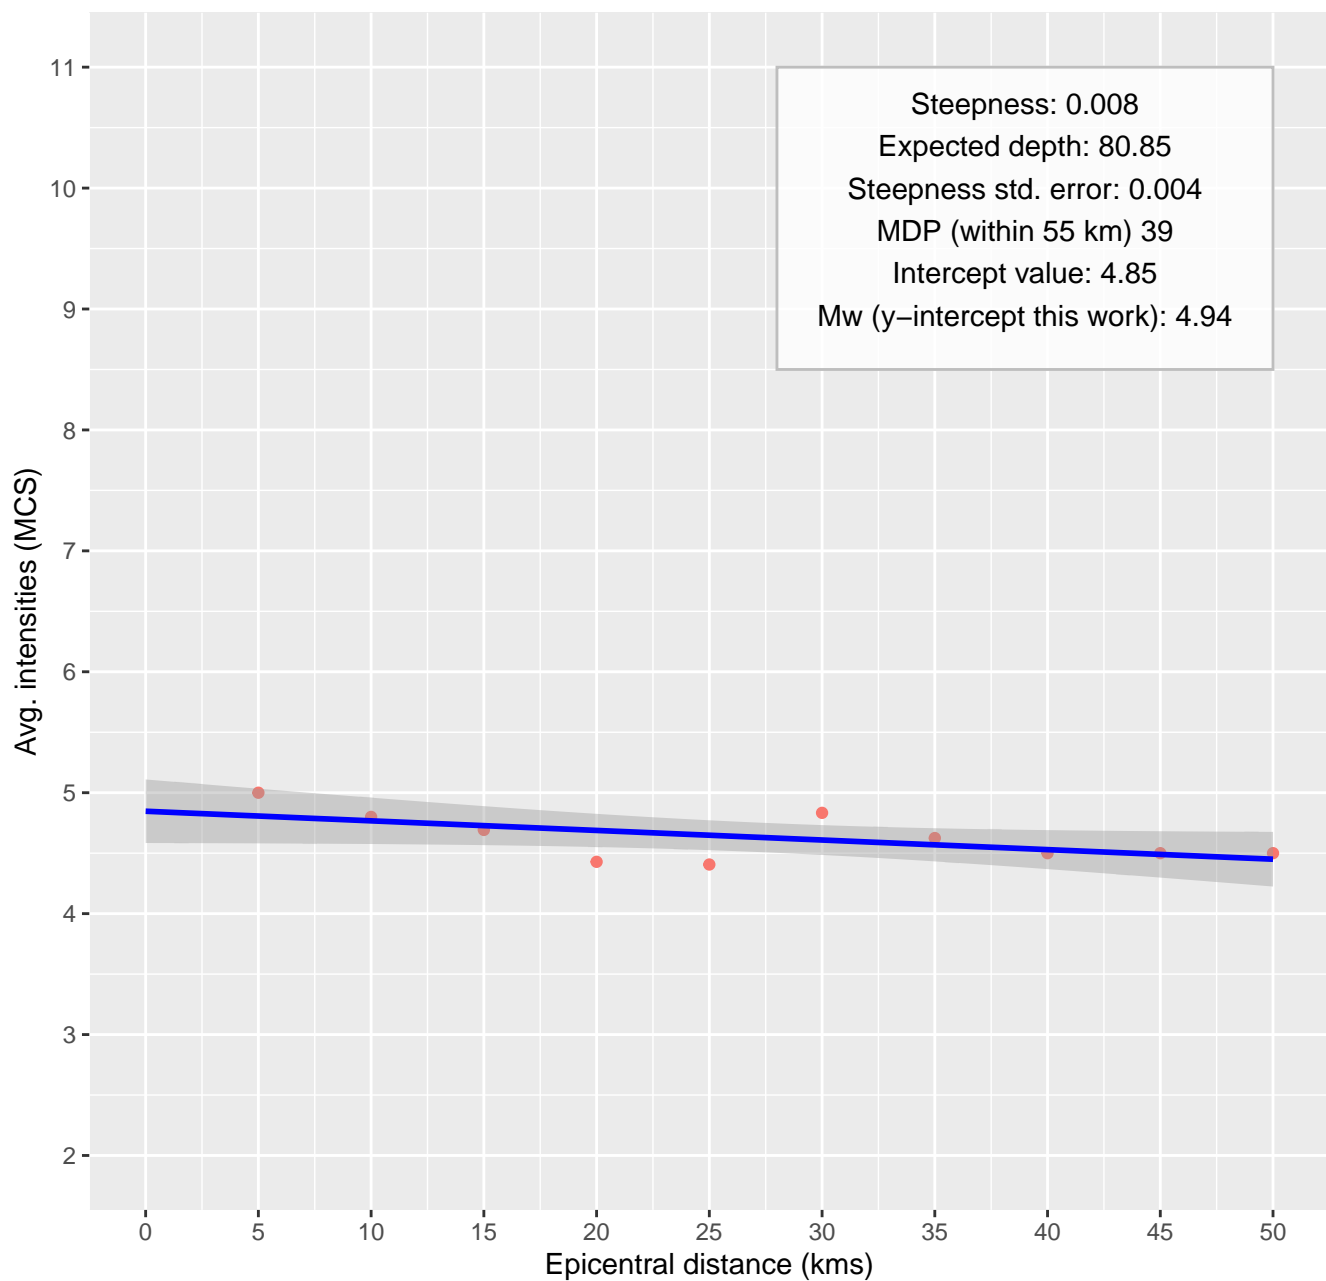

Supplement: Supplementary file 200 [file nhess-23-1007-2023-supplement.zip]

# DBMI\_ 19290410\_0543\_000 | 1929-04-10 – Bolognese

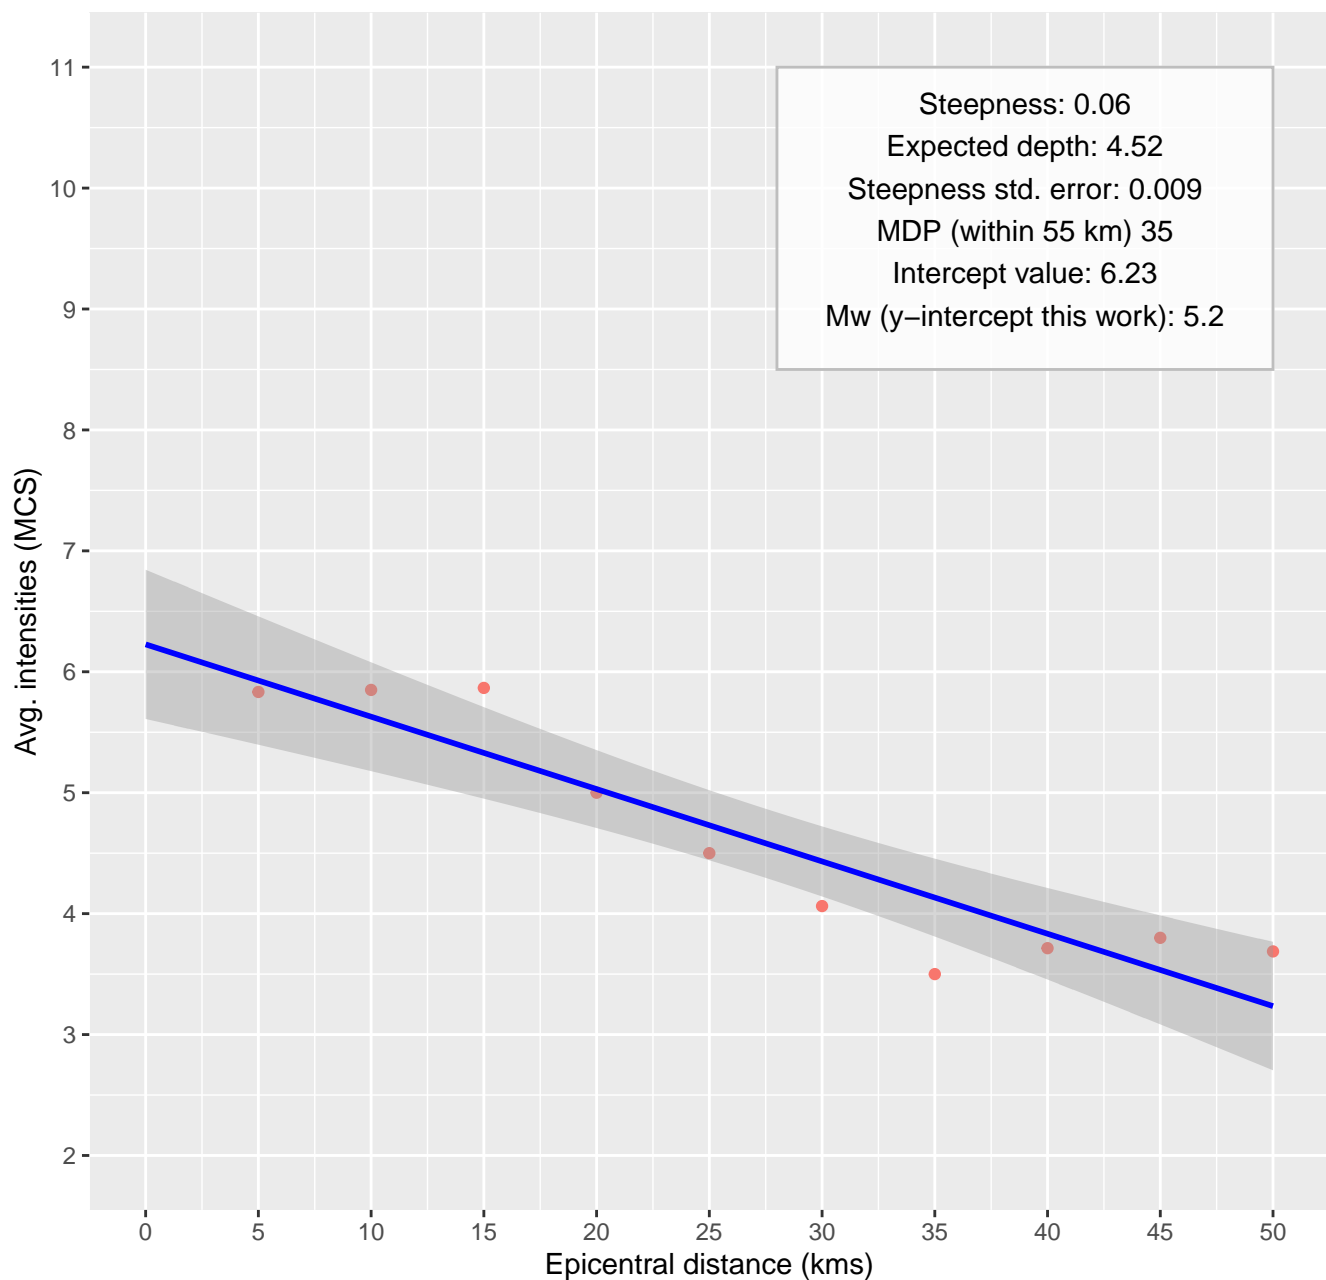

Supplement: Supplementary file 201 [file nhess-23-1007-2023-supplement.zip]

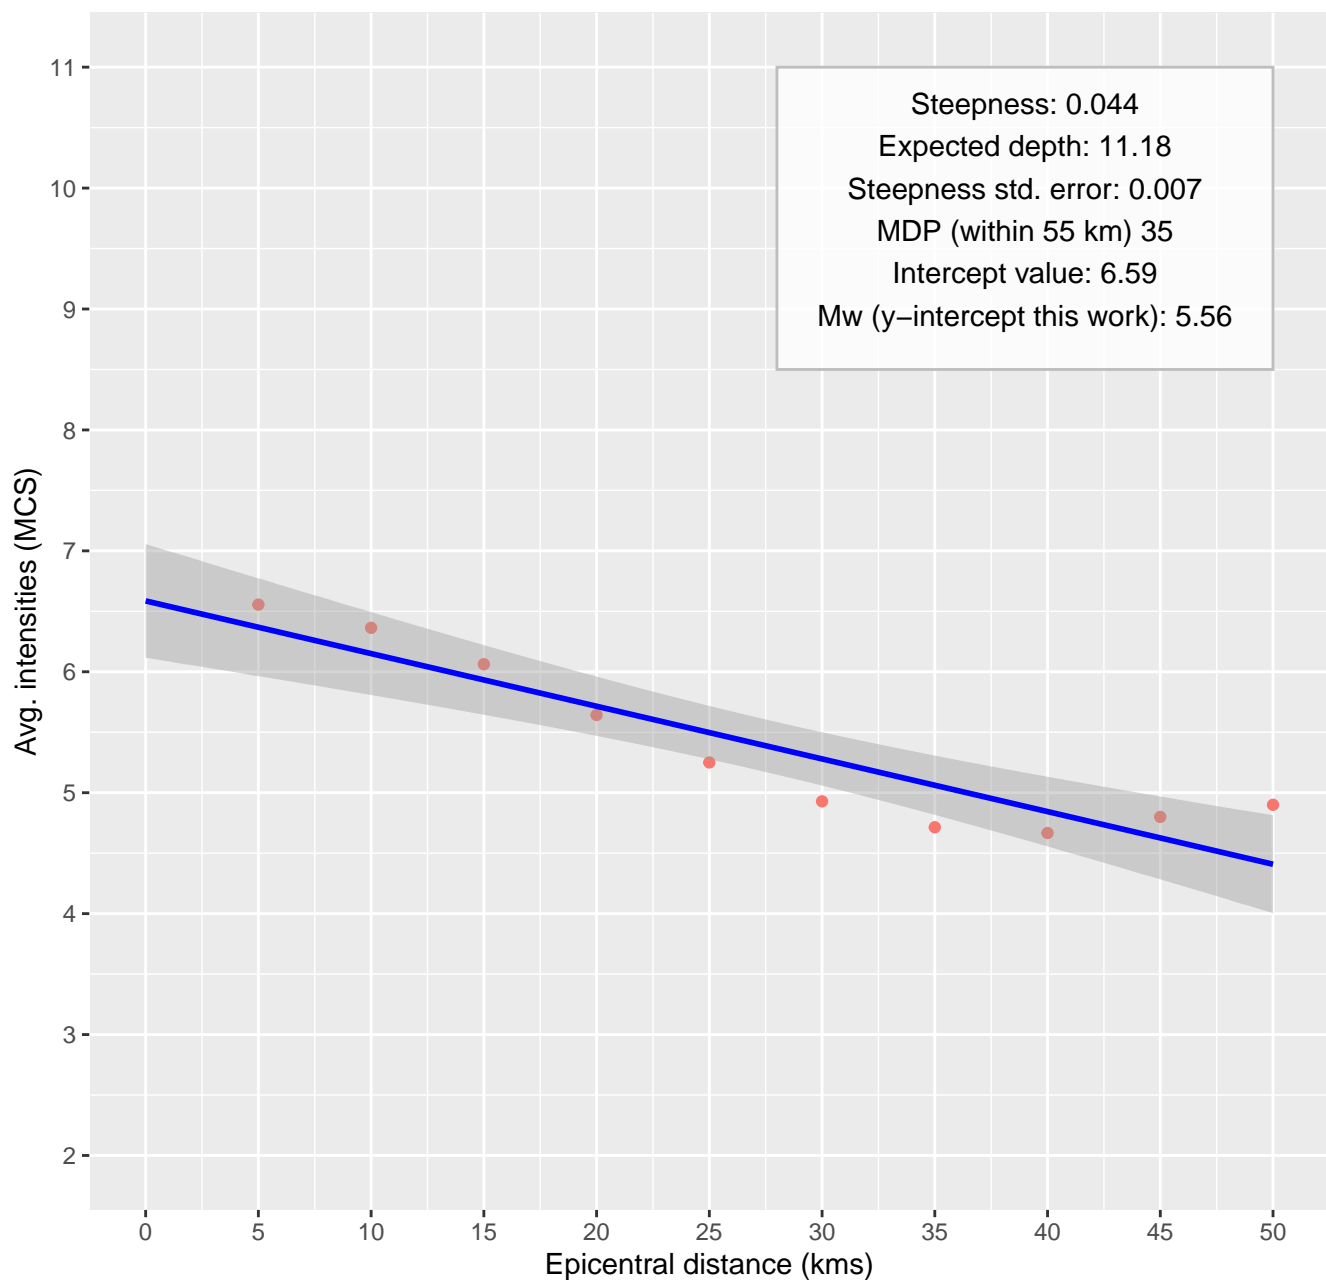

Supplement: Supplementary file 202 [file nhess-23-1007-2023-supplement.zip]
