# Supplementary figures and images for: Inferring the depth and magnitude of pre-instrumental earthquakes from intensity attenuation curves (part 3 of 3)
Source: Copernicus journal article supplement (doi:10.5194/nhess-23-1007-2023), 2023-03-06

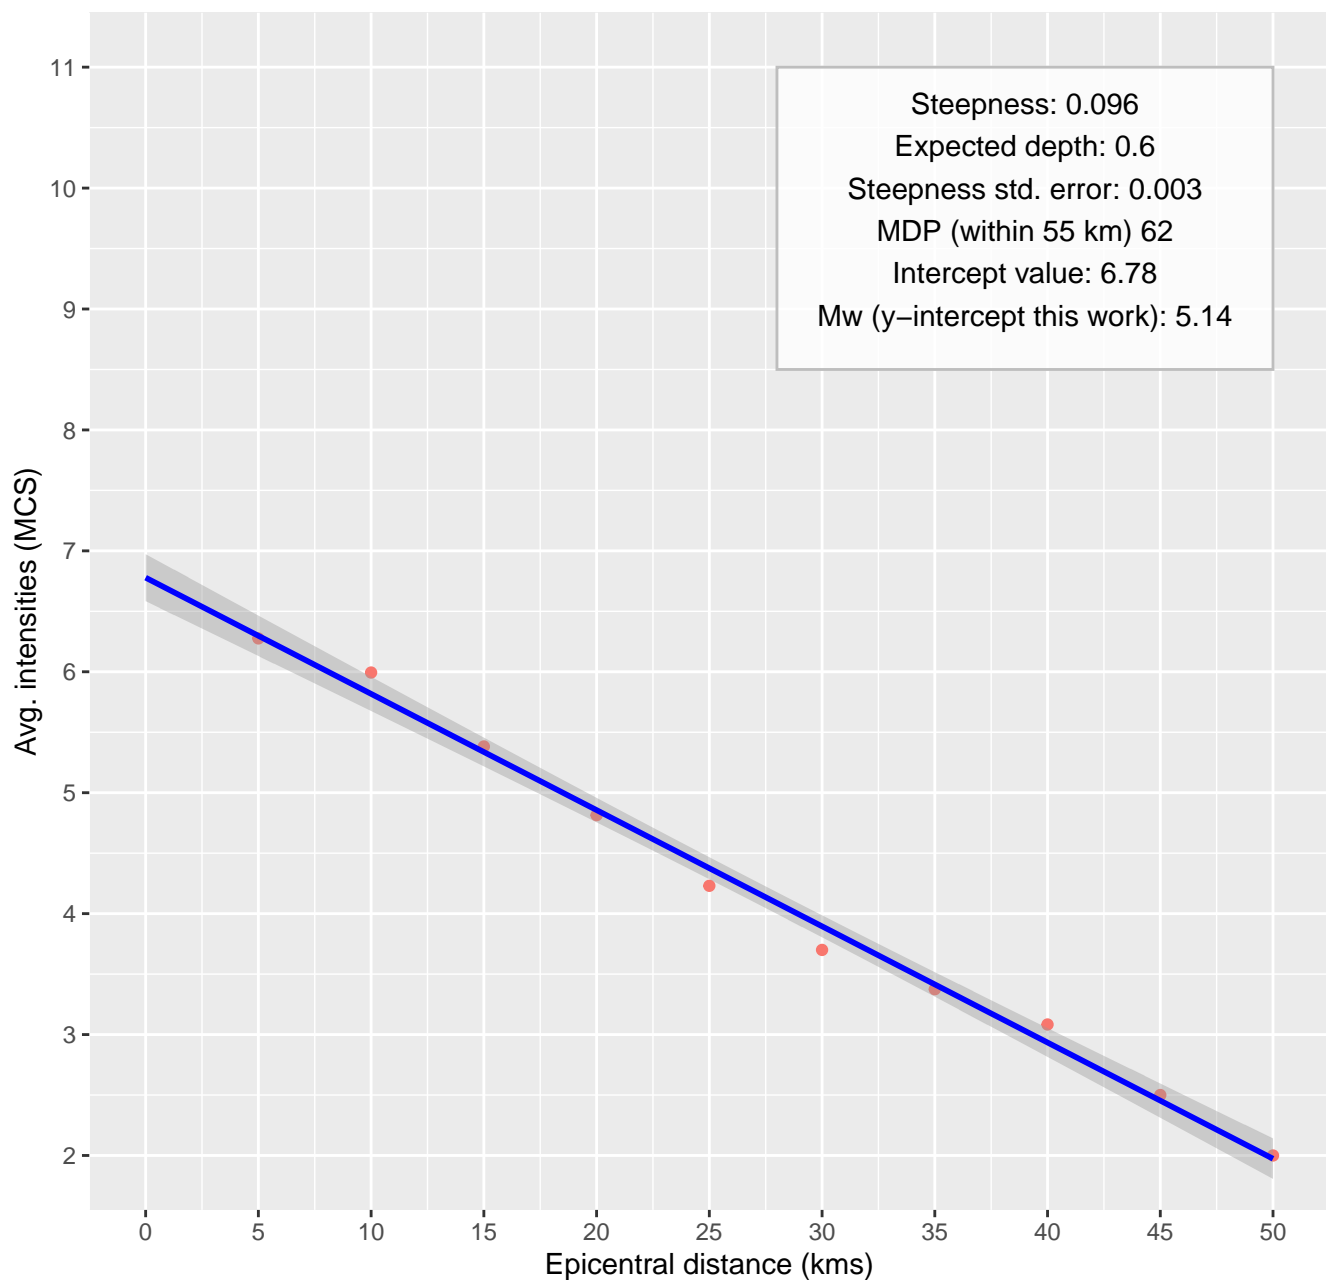

Supplement: Supplementary file 203 [file nhess-23-1007-2023-supplement.zip]

# DBMI\_ 17810603\_0000\_000 | 1781-06-03 – Cagliese

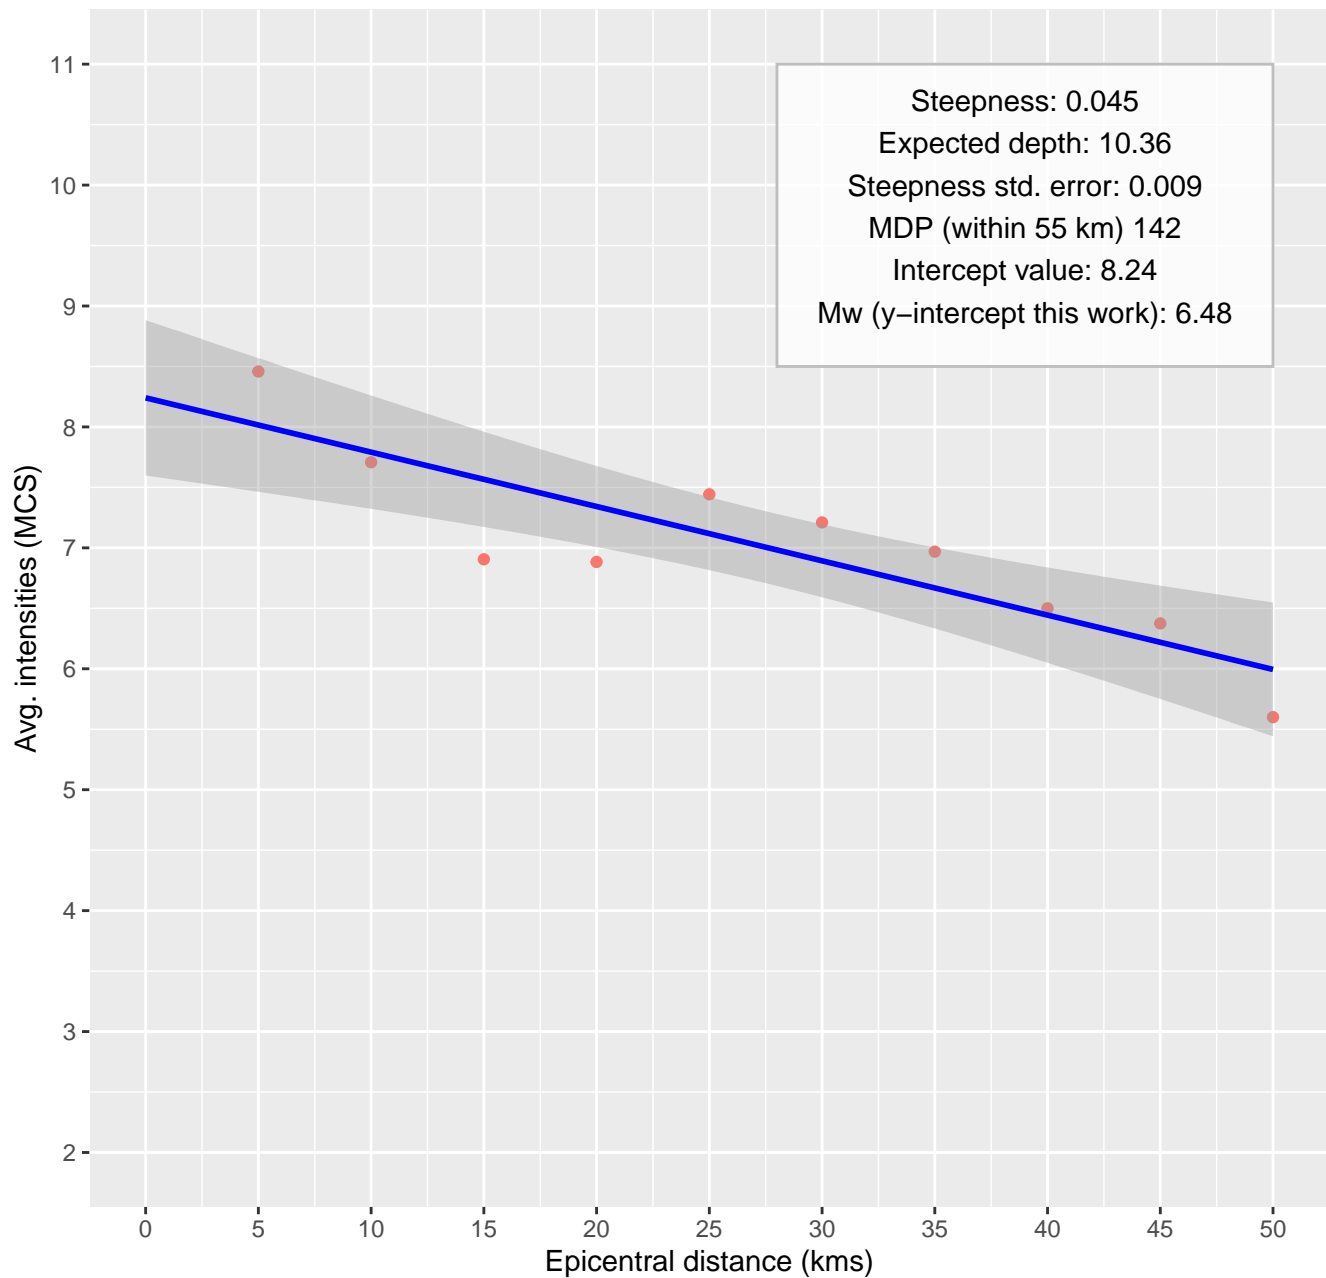

Supplement: Supplementary file 204 [file nhess-23-1007-2023-supplement.zip]

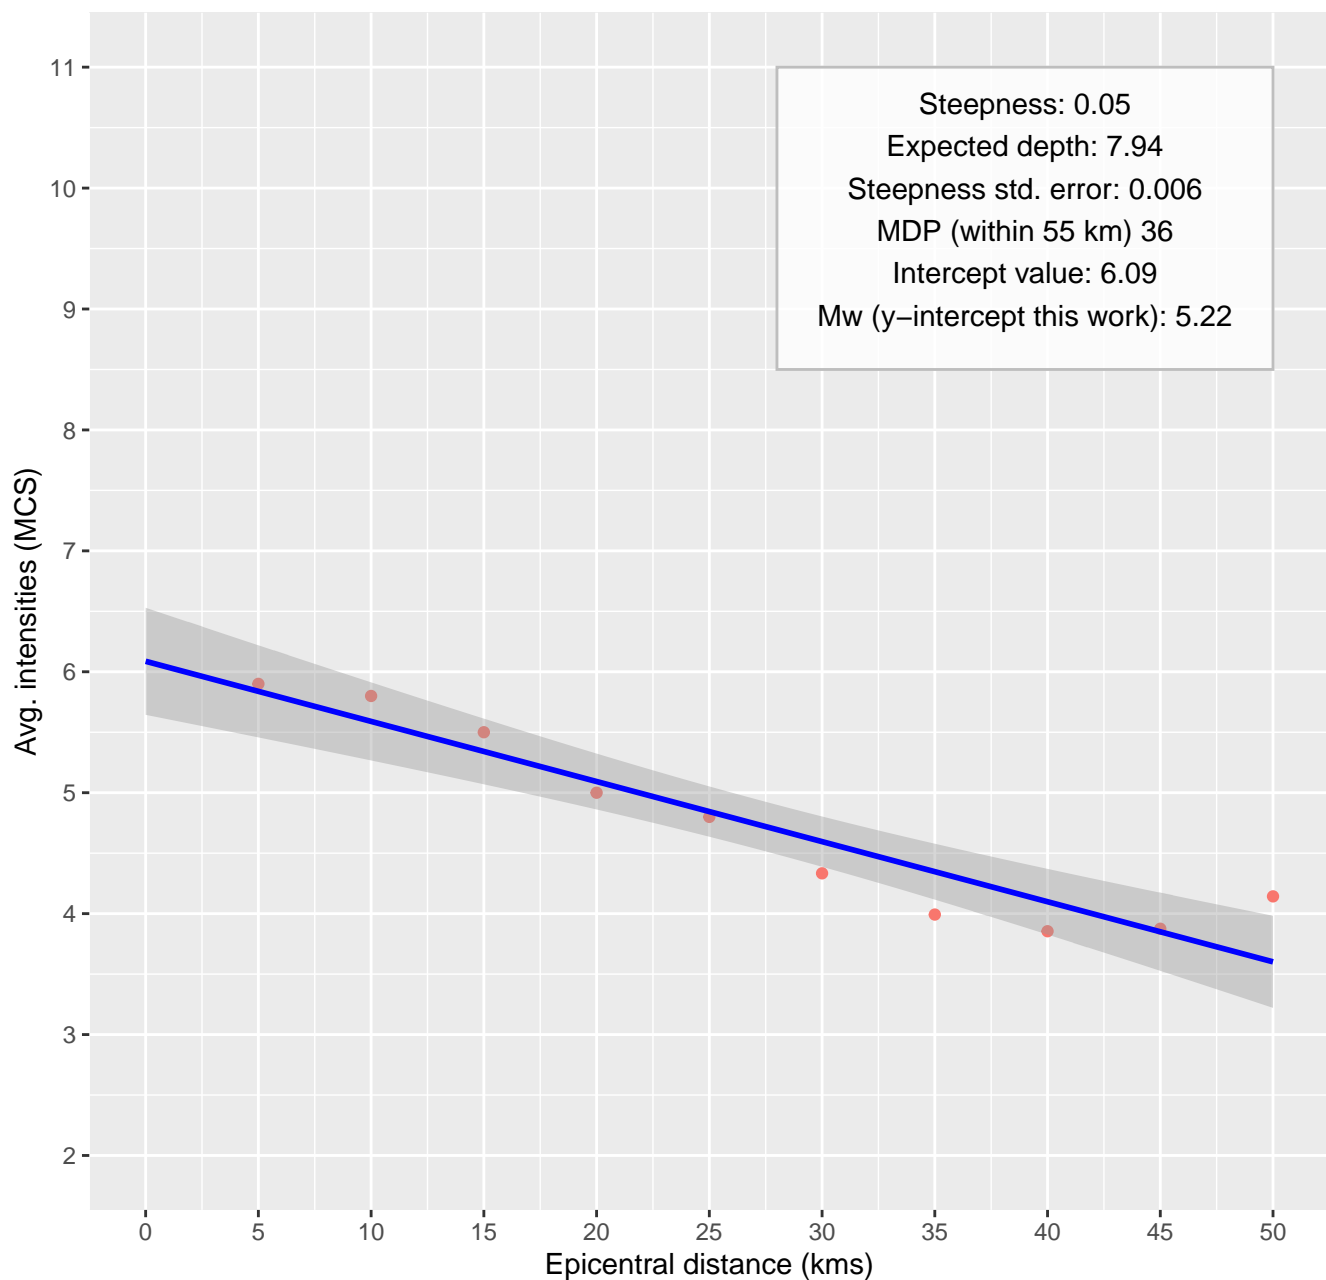

Supplement: Supplementary file 205 [file nhess-23-1007-2023-supplement.zip]

# DBMI\_ 16940908\_1140\_000 | 1694-09-08 – Irpinia–Basilicata

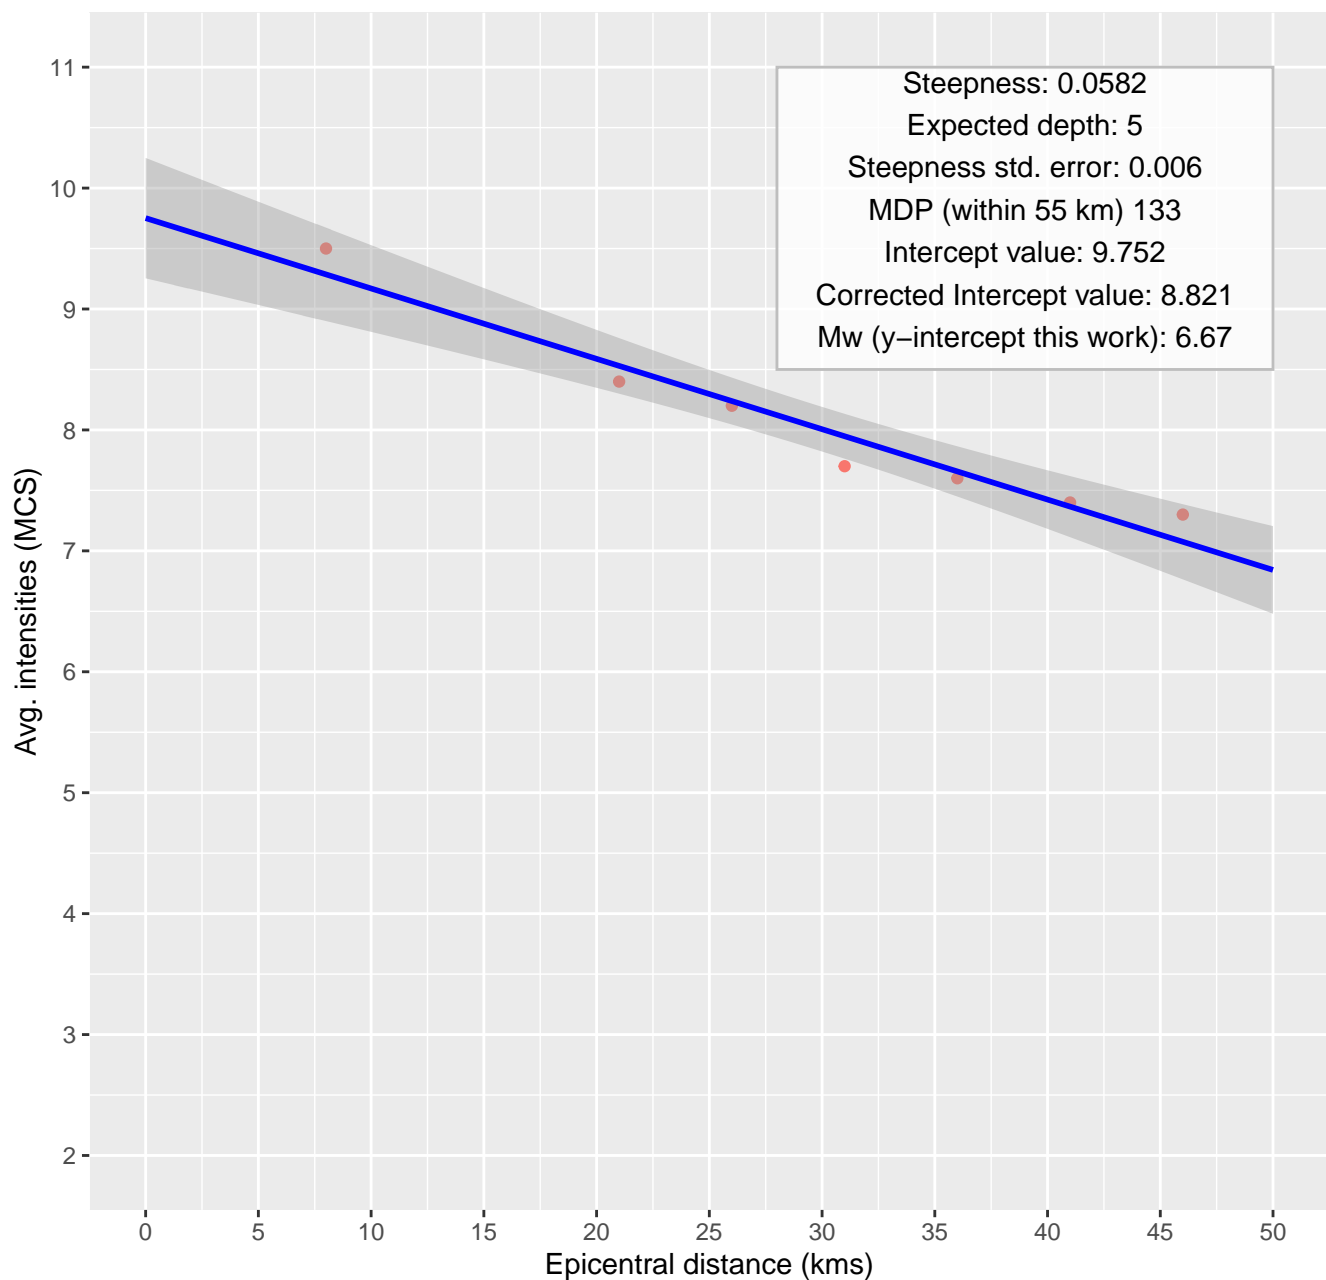

Supplement: Supplementary file 206 [file nhess-23-1007-2023-supplement.zip]

# DBMI\_ 19401016\_1317\_000 | 1940-10-16 – Val di Paglia

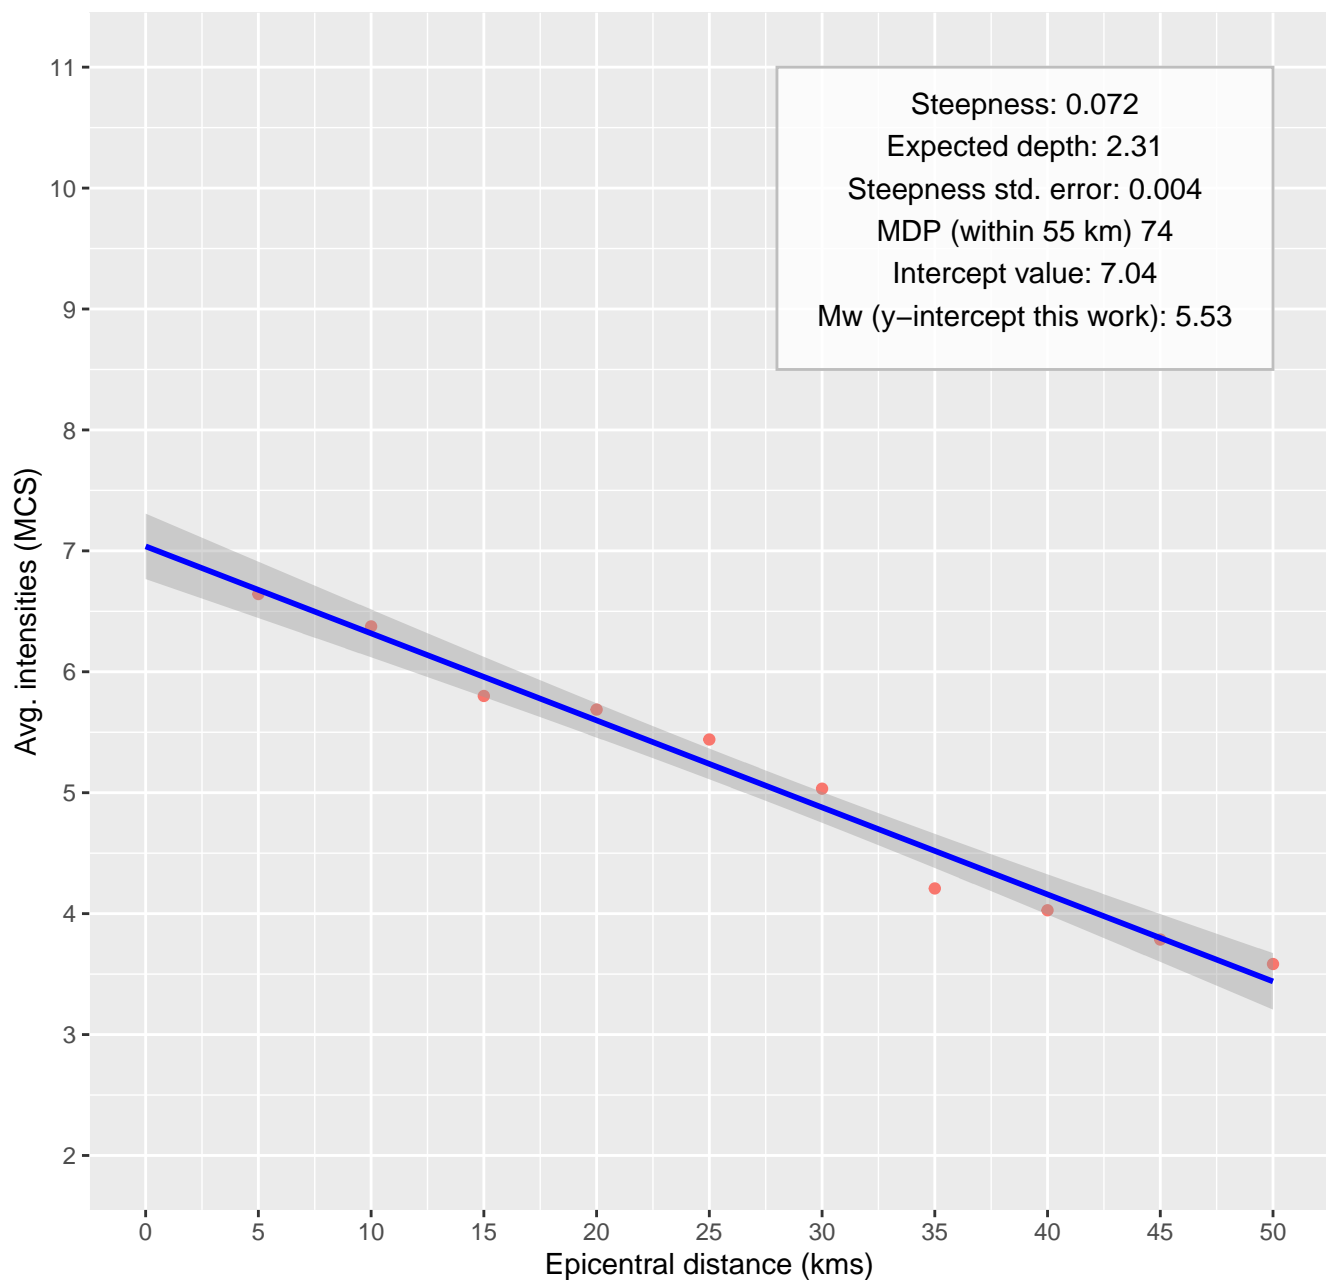

Supplement: Supplementary file 207 [file nhess-23-1007-2023-supplement.zip]

# DBMI\_ 19081228\_0420\_000 | 1908-12-28 – Stretto di Messina

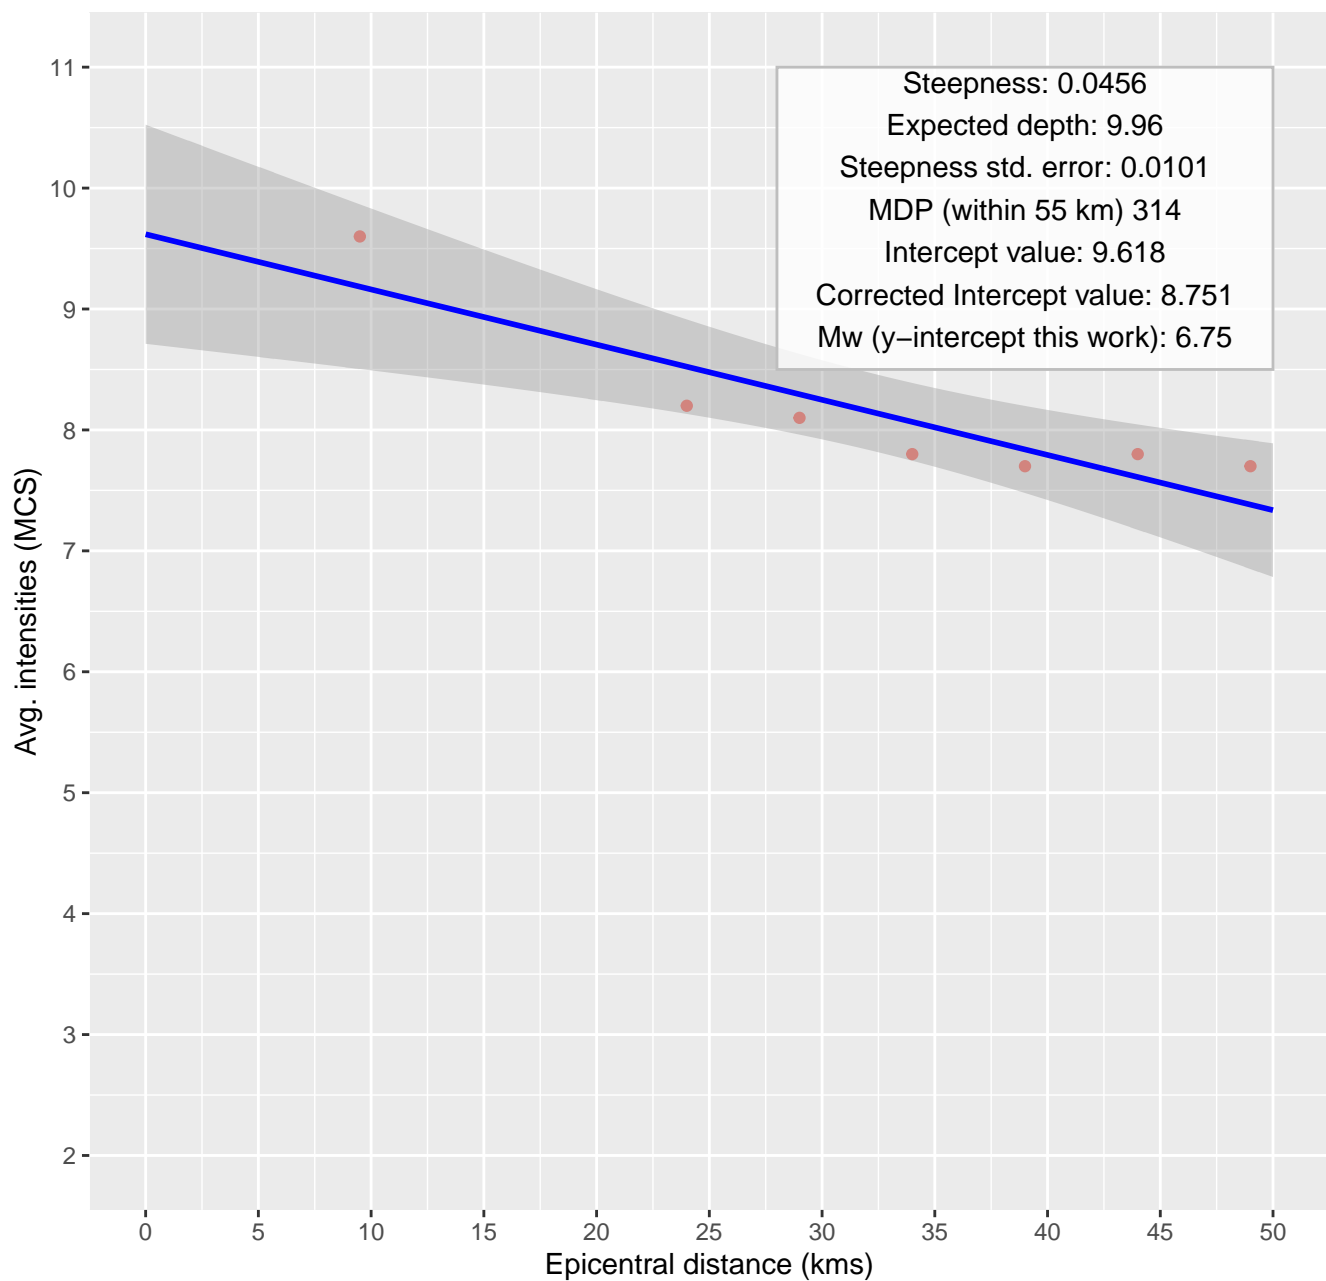

Supplement: Supplementary file 208 [file nhess-23-1007-2023-supplement.zip]

# DBMI\_ 18020512\_0930\_000 | 1802-05-12 – Valle dell'Oglio

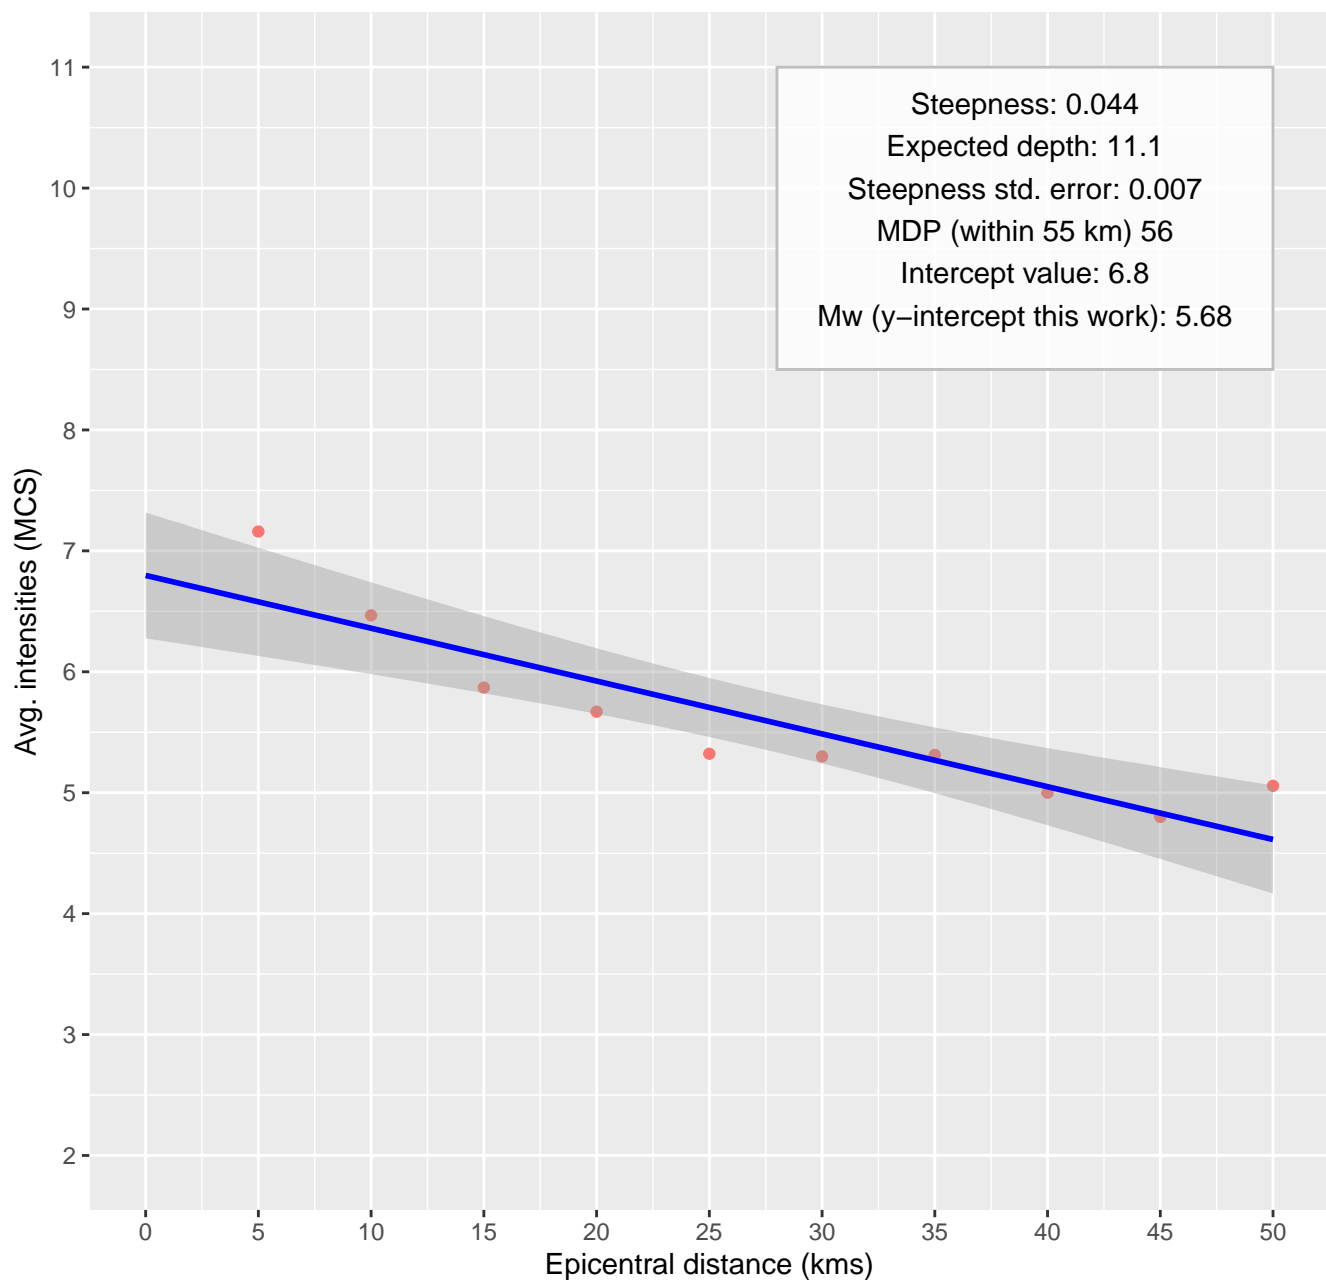

Supplement: Supplementary file 209 [file nhess-23-1007-2023-supplement.zip]

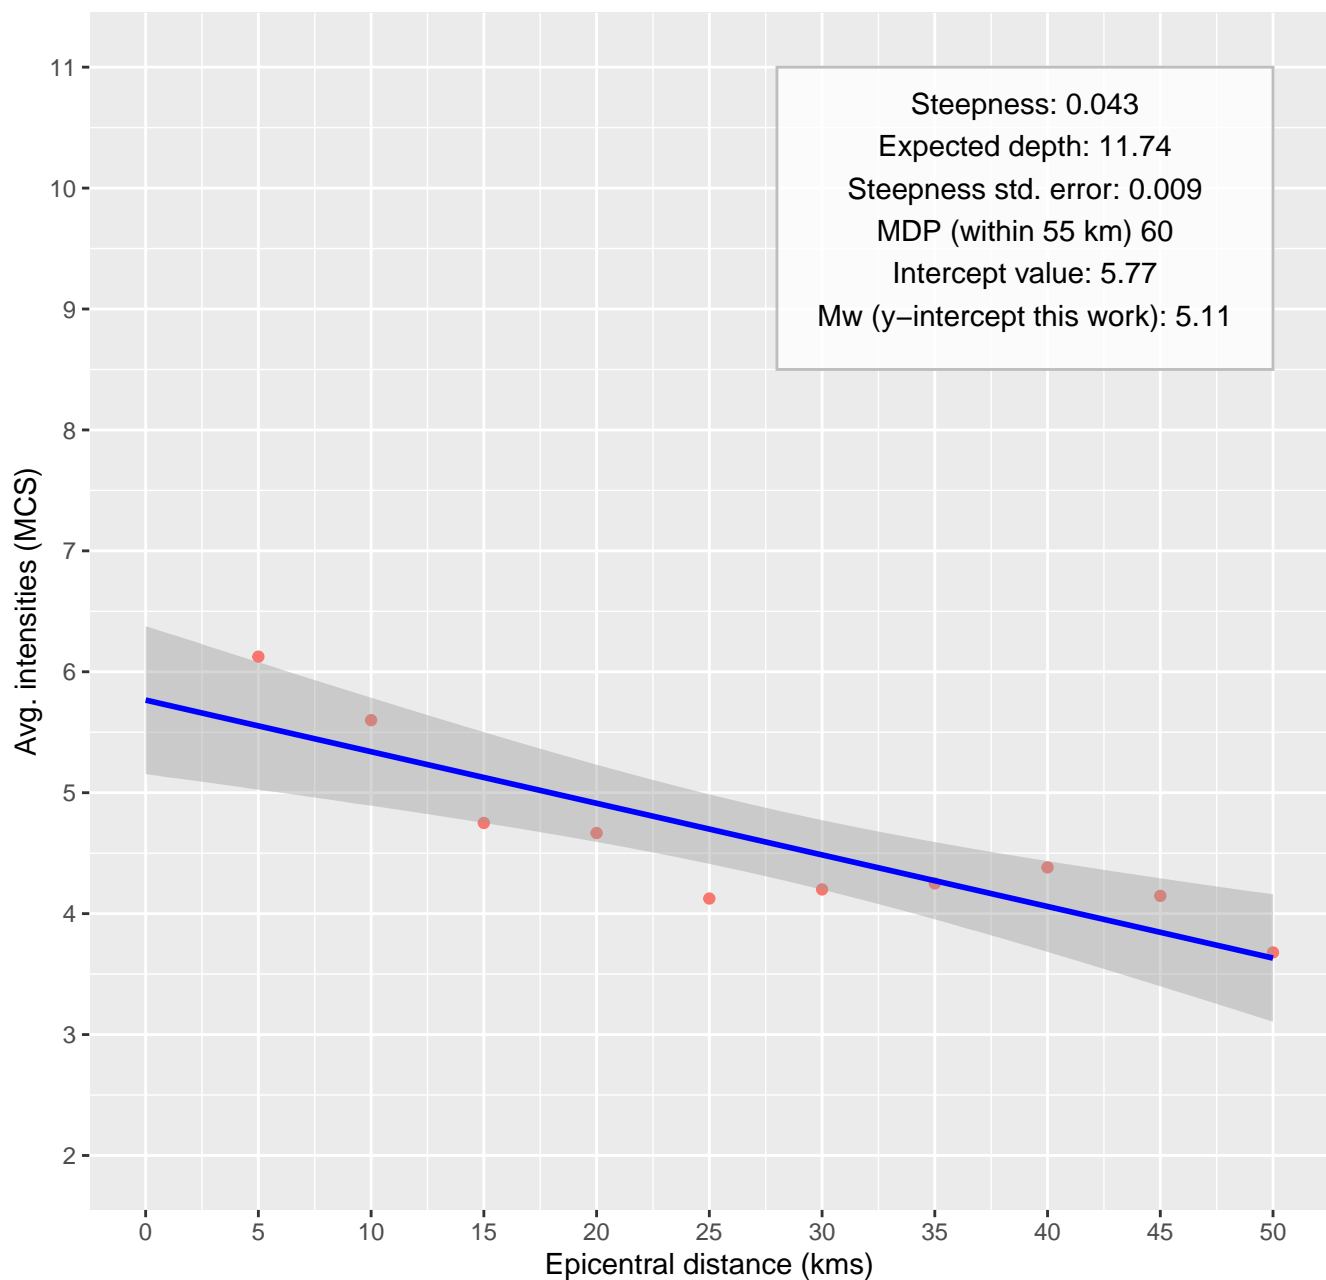

Supplement: Supplementary file 210 [file nhess-23-1007-2023-supplement.zip]
